# Supplementary material
Source: PubMed Central journal article supplement (PMC7726091)

Supplementary Materials for  
Enantioselective Intermolecular Radical C–H Amination

Li-Mei Jin,<sup>§</sup> Pan Xu,<sup>§</sup> Jingjing Xie and X. Peter Zhang\*

<sup>§</sup>These authors contributed equally to this work

Correspondence to: peter.zhang@bc.edu

**This PDF file includes:**

Materials and Methods

Supplementary Text

Tables S1 to S2

Figures S1 to S4

## Table of Contents

|                                                                                                |            |
|------------------------------------------------------------------------------------------------|------------|
| <b>1. General Considerations .....</b>                                                         | <b>S3</b>  |
| <b>2. Synthesis of Catalysts and Substrates .....</b>                                          | <b>S4</b>  |
| 2.1. Synthesis of [Co(P6)] (P6 = 2,6-DiPhS-QingPhyrin).....                                    | S4         |
| 2.2. Synthesis of Substrates .....                                                             | S7         |
| <b>3. Optimization of Reaction Conditions.....</b>                                             | <b>S9</b>  |
| <b>4. DFT-Generated Stereochemical Models for [Co(P6)]-Catalyzed C–H Amination .....</b>       | <b>S10</b> |
| 4.1. Computational Details and Simplifications .....                                           | S10        |
| 4.2. Transition States of Radical Substitution Step.....                                       | S10        |
| 4.3. Comparative Study on C–H Amination Reactions of Ethyl Benzene and Arylacetamide ....      | S26        |
| <b>5. General Procedure for [Co(P6)] Catalyzed C–H Amination with Fluoroaryl Azides....</b>    | <b>S28</b> |
| 5.1. Enantioselective C–H Amination of 1a with Various Fluoroaryl Azides.....                  | S28        |
| 5.2. Enantioselective C–H Amination of Various Arylacetate Esters with 2a .....                | S34        |
| 5.3. Enantioselective C–H Amination of Various Arylcrotonate Esters with 2a.....               | S43        |
| 5.4. Enantioselective C–H Amination of Various Aryltetrolate Esters with 2a.....               | S46        |
| <b>6. Characterization of <math>\alpha</math>-Co(III)-Aminyl Radicals by EPR and HRMS.....</b> | <b>S50</b> |
| 6.1. Procedure for EPR Experiment.....                                                         | S50        |
| 6.2. Procedure for HRMS Experiment.....                                                        | S55        |
| <b>7. Kinetic Isotope Effect (KIE) Experiment .....</b>                                        | <b>S56</b> |
| <b>8. Evaluation of Electronic Effect of C–H Substrates via Hammett Study .....</b>            | <b>S57</b> |
| <b>9. Trapping of Alkyl Radical Intermediate .....</b>                                         | <b>S58</b> |
| <b>10. Probing Allylic Radical via Olefin Isomerization .....</b>                              | <b>S59</b> |
| <b>11. Evaluation of Diastereoselectivity with Chiral C–H Substrates.....</b>                  | <b>S61</b> |
| <b>12. X-ray Crystallographic Information.....</b>                                             | <b>S62</b> |
| 12.1. Single-crystal X-ray Structure of P6 .....                                               | S62        |
| 12.2. Single-crystal X-ray Structure of 3ha .....                                              | S64        |
| 12.3. Single-crystal X-ray Structure of 3ma .....                                              | S66        |
| 12.4. Single-crystal X-ray Structure of 3va.....                                               | S68        |
| <b>13. Reference .....</b>                                                                     | <b>S70</b> |
| <b>Copies of NMR/HPLC Spectra.....</b>                                                         | <b>S71</b> |

## 1. General Considerations

Proton nuclear magnetic resonance ( $^1\text{H}$  NMR) spectra and carbon nuclear magnetic resonance ( $^{13}\text{C}$  NMR) spectra were recorded on a Varian 600-MHz or Bruker 500-MHz or Bruker 400-MHz instrument. Chemical shifts for protons are reported in parts per million downfield from tetramethylsilane and are referenced to residual protium in the NMR solvent ( $\text{CHCl}_3 = 7.26$  ppm,  $(\text{CH}_3)_2\text{CO} = 2.05$  ppm,  $(\text{CH}_3)_2\text{SO} = 2.5$  ppm). Chemical shifts for carbon are reported in parts per million downfield from tetramethylsilane and are referenced to the carbon resonances of the solvent residual peak ( $\text{CDCl}_3 = 77.00$  ppm). High-resolution mass spectrometry was performed on a Micromass LCT ESI-MS and JEOL Accu TOF Dart at the Mass Spectrometry Facility, Boston College. Infrared spectra were measured with a Nicolet Avatar 320 spectrometer with a Smart Miracle accessory. Optical rotations were measured on a Rudolph Research Analytical AUTOPOL® IV digital polarimeter. HPLC measurements were carried out on a Shimadzu HPLC system with Chiralcel OD-H, OJ-H, AD-H, IA, IB, IC, ID, IE, IF and Whelk columns. The UV-Vis absorption spectra in the range 200–700 nm were measured with an Evolution 300 UV-VIS spectrophotometer using quartz cuvettes with 1.0 dm optical path length.

Unless otherwise noted, all catalytic reactions were performed under an atmosphere of  $\text{N}_2$ , in oven-dried glassware following standard vacuum line techniques. Gas tight syringes were used to transfer liquid reagents and solvents in catalytic reactions. Anhydrous solvents as well as other commercial reagents were purchased from Sigma-Aldrich, Acros, Alfa Aesar, Strem, Oakwood Products Inc., TCI, or Matrix Scientific and used as received unless otherwise stated. All azides were synthesized according to the reported procedure (1, 2). Thin layer chromatography was performed on Merck TLC plates (silica gel 60 F254). Flash column chromatography was performed with ICN silica gel (60 Å, 230-400 mesh, 32-63  $\mu\text{m}$ ).

## 2. Synthesis of Catalysts and Substrates

### 2.1. Synthesis of [Co(P6)] (P6 = 2,6-DiPhS-QingPhyrin)

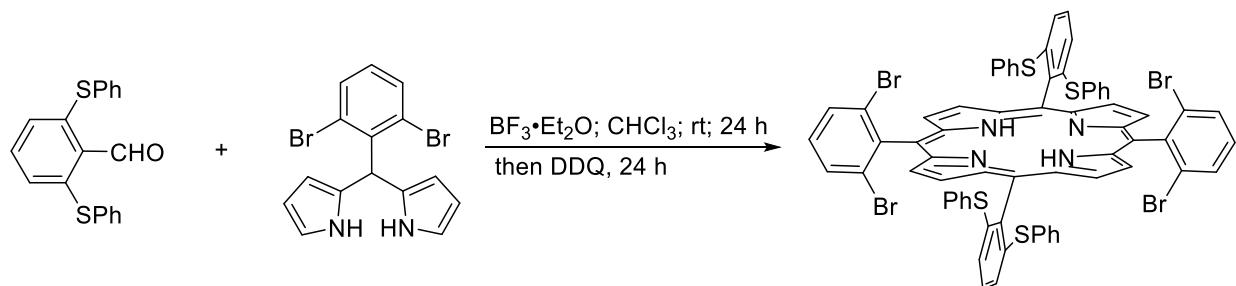

5,15-bis(2,6-bis(phenylthio)phenyl)-10,20-bis(2,6-dibromophenyl)porphyrin was synthesized through modified procedure of our reported method (3) : A mixture of 2,6-bis(phenylthio)benzaldehyde (4) (828 mg, 2.6 mmol), *meso*-(2,6-dibromophenyl)dipyrromethane (1 g, 2.6 mmol) in chloroform (300 mL) was purged with nitrogen for 5 min. Boron trifluoride diethyl etherate (0.26 mL) was added dropwise via a syringe and the flask was wrapped with aluminum foil to shield it from light. The solution was stirred under a nitrogen atmosphere at room temperature for 24 h, and then 2,3-dichloro-5,6-dicyano-1,4-benzoquinone (DDQ) (700 mg, 3 mmol) was added as powder at one time. After 24 h, 1 mL of triethylamine was added. The reaction solution was then allowed to sit in refrigerator for overnight to precipitate the product. The precipitate was then filtrated out through Büchner funnel. The residue was washed several times with methanol and then hexanes to afford the pure compound **5,15-bis(2,6-bis(phenylthio)phenyl)-10,20-bis(2,6-dibromophenyl)porphyrin** (510 mg, 29% yield). <sup>1</sup>H NMR (600 MHz, DMSO-*d*<sub>6</sub>): δ 8.77 (brs, 4H), 8.62 (m, 4H), 8.21 (d, *J* = 8.3 Hz, 4H), 7.76 (t, *J* = 8.4 Hz, 2H), 7.67 (t, *J* = 8.3 Hz, 2H), 7.30 (d, *J* = 8.3 Hz, 4H), 7.27 – 7.19 (m, 20H), -2.48 (s, 2H). <sup>13</sup>C NMR spectrum could not be obtained due to poor solubility of the compound. UV–vis (CHCl<sub>3</sub>), λ<sub>max</sub> nm (log ε): 432 (5.42), 524 (4.37), 560 (3.72), 598 (3.95), 654 (3.36). HRMS (ESI) ([M+H]<sup>+</sup>) Calcd. for C<sub>68</sub>H<sub>43</sub>Br<sub>4</sub>N<sub>4</sub>S<sub>4</sub>: 1358.9104; Found: 1358.9092.



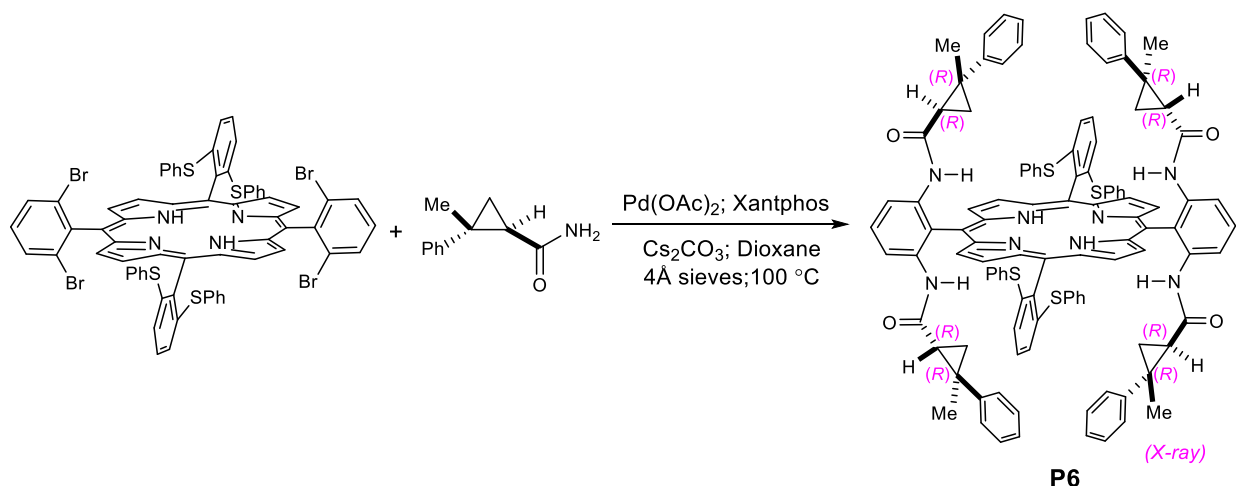

**P6** was synthesized according to our previously reported procedure (3). The 5,15-bis(2,6-bis(phenylthio)phenyl)-10,20-bis(2,6-dibromophenyl)porphyrin (360 mg, 0.26 mmol), (1*R*,2*R*)-2-methyl-2-phenylcyclopropane-1-carboxamide (5) (528 mg, 3 mmol), Pd(OAc)<sub>2</sub> (27 mg, 0.12 mmol), Xantphos (138 mg, 0.24 mmol), 4 Å molecular sieves and Cs<sub>2</sub>CO<sub>3</sub> (1.95 g, 6 mmol) were placed in an oven-dried, re-sealable Schlenk tube. The tube was capped with a Teflon screw cap, evacuated, and backfilled with nitrogen for three times. The screw cap was replaced with a rubber septum, and dioxane (24 mL) was added via syringe. The tube was purged with nitrogen for 1 min, and then the septum was replaced with the Teflon screw cap. The tube was sealed, and its contents were heated at 100 °C for 72 h with stirring. The resulting mixture was cooled to room temperature, diluted with ethyl acetate, filtered through a short pad of silica gel and concentrated in vacuo. The crude product was then purified by flash chromatography (silica gel, EtOAc/hexanes = 1/3, v/v) to give the desired product **P6** (300 mg, 66% yield). <sup>1</sup>H NMR (600 MHz, CDCl<sub>3</sub>): δ 8.96 – 8.91 (m, 8H), 8.51 (brs, 4H), 7.91 (brs, *J* = 8.0 Hz, 2H), 7.50 (t, *J* = 7.8 Hz, 2H), 7.21 – 7.15 (m, 24H), 6.83 (s, 4H), 6.33 (brs, 4H), 6.14 (brs, 8H), 6.01 (brs, 8H), 1.12 (brs, 12H), 0.71 (brs, 4H), 0.54 (brs, 4H), 0.36 (brs, 4H), -2.06 (s, 2H). <sup>13</sup>C NMR (150 MHz, CDCl<sub>3</sub>) δ 168.74, 144.36, 143.09, 138.88, 137.20, 133.54, 133.47, 130.21, 129.88, 129.28, 128.31, 127.31, 125.67, 125.14, 121.72, 118.26, 117.06, 108.19, 30.65, 28.83, 19.30, 18.96. UV–vis (CHCl<sub>3</sub>), λ<sub>max</sub> nm (log ε): 436 (5.28), 524 (4.29), 564 (3.70), 596 (3.9), 650 (3.47). HRMS (ESI) ([M+H]<sup>+</sup>) Calcd. for C<sub>112</sub>H<sub>91</sub>N<sub>8</sub>O<sub>4</sub>S<sub>4</sub>: 1739.6046; Found: 1739.6077.

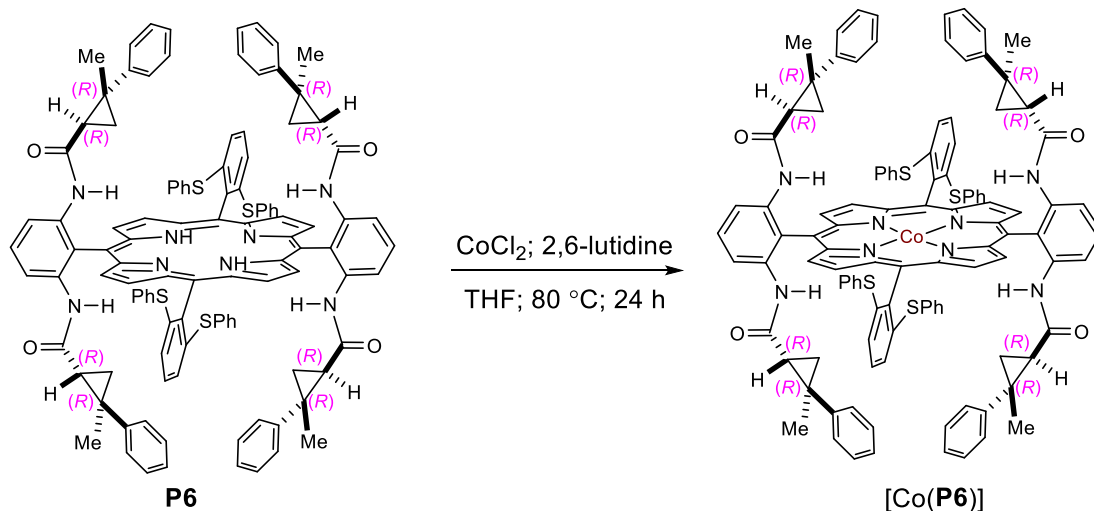

[Co(**P6**)] was synthesized according to our previously reported procedure (3). Free base porphyrin **P6** (230 mg, 0.13 mmol) and anhydrous  $\text{CoCl}_2$  (170 mg, 1.3 mmol) were placed in an oven-dried, re-sealable Schlenk tube. The tube was capped with a Teflon screw cap, evacuated, and backfilled with nitrogen. The screw cap was replaced with a rubber septum, 2,6-lutidine (139 mg, 1.3 mmol) and dry THF (5 mL) were added via syringe. The tube was purged with nitrogen for 1 min, and then the septum was replaced with the Teflon screw cap. The tube was sealed, and its contents were heated at 80 °C for 24 h with stirring. The resulting mixture was cooled to room temperature, diluted with ethyl acetate, and transferred to a separatory funnel. The mixture was washed with water 3 times and concentrated in vacuo. The pure compound [Co(**P6**)] was obtained after flash column chromatography (200 mg, 86% yield). UV–vis ( $\text{CHCl}_3$ ),  $\lambda_{\text{max}}$  nm (log  $\epsilon$ ): 426 (5.18), 532 (4.2), 570 (3.94). HRMS (ESI) ( $[\text{M}]^+$ ) Calcd. for  $\text{C}_{112}\text{H}_{89}\text{CoN}_8\text{O}_4\text{S}_4$ : 1796.5222, Found: 1796.5177.

## 2.2. Synthesis of Substrates

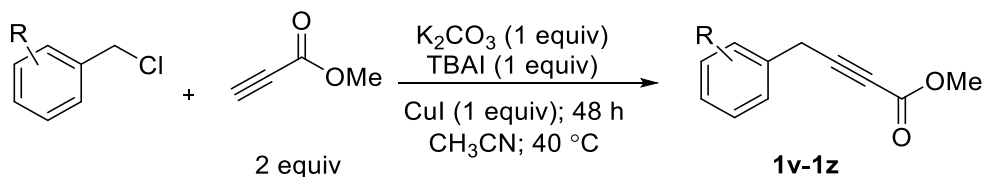

**1v-1z** were synthesized according to reported procedure (6). An oven-dried round-bottom flask with a stir bar was charged with CuI (5 mmol),  $K_2CO_3$  (5 mmol) and tetrabutylammonium iodide (5 mmol). The flask was placed under a nitrogen atmosphere, and then anhydrous acetonitrile (25 mL) was added via syringe. Next, the benzyl chloride (5 mmol) was added via syringe (if the benzyl chloride was a solid, it was added before the flask was placed under nitrogen), followed by methyl propiolate (10 mmol). The reaction mixture was stirred at  $40\text{ }^\circ\text{C}$  for 48 h, and then the reaction was quenched with saturated aqueous  $NH_4Cl$ . The reaction mixture was extracted twice with  $Et_2O$ , and the combined organic extracts were dried over anhydrous  $Na_2SO_4$ , filtered, and concentrated. The resulting residue was purified by column chromatography (hexanes/ethyl acetate, 40:1 to 20:1 gradient) to afford the products **1v-1z**.

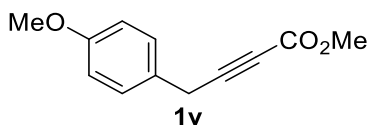

**Methyl 4-(4-methoxyphenyl)but-2-ynoate 1v**. Yellow oil. Yield: 81%.  $^1H$  NMR (500 MHz,  $CDCl_3$ )  $\delta$  7.22 (d,  $J = 8.3$  Hz, 2H), 6.86 (d,  $J = 8.1$  Hz, 2H), 3.79 (s, 3H), 3.77 (s, 3H), 3.68 (s, 2H).  $^{13}C$  NMR (125 MHz,  $CDCl_3$ )  $\delta$  158.76, 154.12, 129.01, 125.95, 114.18, 87.19, 74.27, 55.29, 52.60, 24.14. This compound is known.

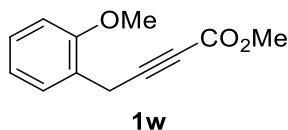

**Methyl 4-(2-methoxyphenyl)but-2-ynoate 1w**. Yellow oil. Yield: 73%.  $^1H$  NMR (600 MHz,  $CDCl_3$ )  $\delta$  7.40 (d,  $J = 7.3$  Hz, 1H), 7.25 (t,  $J = 7.1$  Hz, 1H), 6.94 (t,  $J = 7.5$  Hz, 1H), 6.85 (d,  $J = 8.2$  Hz, 1H), 3.83 (s, 3H), 3.76 (s, 3H), 3.70 (s, 2H).  $^{13}C$  NMR (150 MHz,  $CDCl_3$ )  $\delta$  156.64, 154.18,

128.91, 128.47, 122.44, 120.56, 110.11, 87.19, 74.21, 55.28, 52.59, 19.45. This compound is known.

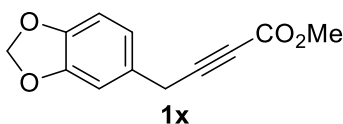

**Methyl 4-(benzo[d][1,3]dioxol-5-yl)but-2-ynoate 1x.** Yellow oil. Yield: 80%.  $^1\text{H}$  NMR (600 MHz,  $\text{CDCl}_3$ )  $\delta$  6.80 (s, 1H), 6.80 – 6.75 (m, 2H), 5.94 (s, 2H), 3.77 (s, 3H), 3.64 (s, 2H).  $^{13}\text{C}$  NMR (150 MHz,  $\text{CDCl}_3$ )  $\delta$  154.03, 147.94, 146.74, 127.55, 121.02, 108.52, 108.36, 101.24, 86.75, 74.41, 52.62, 24.65. IR (neat,  $\text{cm}^{-1}$ ): 2898, 2237, 1708, 1487, 1241, 1034, 750. HRMS (DART) ( $[\text{M}+\text{H}]^+$ ) Calcd. for:  $\text{C}_{12}\text{H}_{11}\text{O}_4$ : 219.06519, Found: 219.06505.

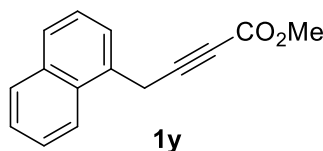

**Methyl 4-(naphthalen-1-yl)but-2-ynoate 1y.** Yellow oil. Yield: 73%.  $^1\text{H}$  NMR (500 MHz,  $\text{CDCl}_3$ )  $\delta$  7.95 (d,  $J = 8.4$  Hz, 1H), 7.89 (d,  $J = 8.4$  Hz, 1H), 7.81 (d,  $J = 8.2$  Hz, 1H), 7.61 – 7.56 (m, 2H), 7.53 (m, 1H), 7.45 (dd,  $J = 8.3, 7.0$  Hz, 1H), 4.13 (s, 2H), 3.77 (s, 3H).  $^{13}\text{C}$  NMR (150 MHz,  $\text{CDCl}_3$ )  $\delta$  154.08, 133.72, 131.17, 129.81, 128.83, 128.20, 126.53, 126.10, 125.97, 125.53, 122.99, 86.35, 75.27, 52.64, 22.88. This compound is known.

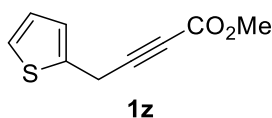

**Methyl 4-(thiophen-2-yl)but-2-ynoate 1z.** Yellow oil. Yield: 49%.  $^1\text{H}$  NMR (600 MHz,  $\text{CDCl}_3$ )  $\delta$  7.18 (d,  $J = 5.0$  Hz, 1H), 6.96 (m, 1H), 6.93 (m, 1H), 3.89 (s, 2H), 3.76 (s, 3H).  $^{13}\text{C}$  NMR (150 MHz,  $\text{CDCl}_3$ )  $\delta$  153.79, 135.77, 126.93, 125.86, 124.72, 85.34, 74.04, 52.60, 19.73. IR (neat,  $\text{cm}^{-1}$ ): 2953, 2238, 1707, 1433, 1249, 1078, 699. HRMS (DART) ( $[\text{M}+\text{H}]^+$ ) Calcd. for:  $\text{C}_9\text{H}_9\text{O}_2\text{S}$ : 181.03178, Found: 181.03123.

### 3. Optimization of Reaction Conditions

**Table S1. Optimization of Reaction Conditions using [Co(P6)]<sup>a</sup>**

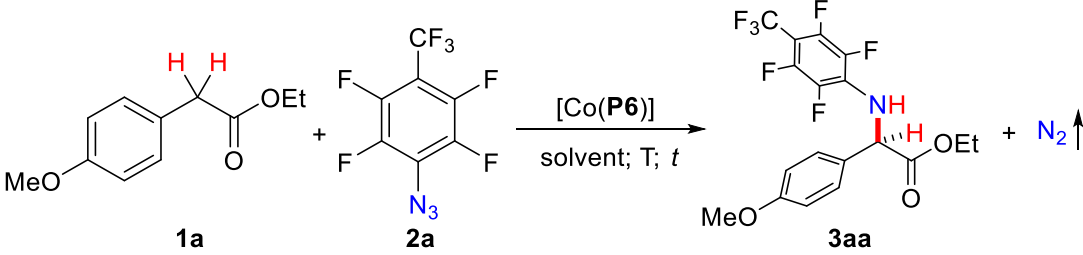

| entry          | temp (°C) | solvent                                  | yield (%) <sup>b</sup> | ee (%) <sup>c</sup> |
|----------------|-----------|------------------------------------------|------------------------|---------------------|
| 1              | 40        | benzene                                  | 43                     | 97                  |
| 2              | 60        | benzene                                  | 80                     | 88                  |
| 3              | 40        | fluobenzene                              | 12                     | 92                  |
| 4              | 40        | hexane                                   | 26                     | 95                  |
| 5              | 40        | $\alpha,\alpha,\alpha$ -trifluorotoluene | 25                     | 96                  |
| 6 <sup>d</sup> | 40        | $\alpha,\alpha,\alpha$ -trifluorotoluene | 68                     | 97                  |
| 7 <sup>e</sup> | 40        | $\alpha,\alpha,\alpha$ -trifluorotoluene | 95                     | 97                  |
| 8 <sup>e</sup> | 20        | $\alpha,\alpha,\alpha$ -trifluorotoluene | 38                     | 97                  |

<sup>a</sup> Carried out with **1a** (0.10 mmol) and **2a** (0.15 mmol) in the presence of 4Å MS by [Co(P6)] (2 mol %) in solvent (0.5 mL) for 24 h. <sup>b</sup> Isolated yields. <sup>c</sup> Determined by chiral HPLC. <sup>d</sup> [Co(P6)] (4 mol %) and 24 h. <sup>e</sup> [Co(P6)] (4 mol %) and 48 h.

## 4. DFT-Generated Stereochemical Models for [Co(P6)]-Catalyzed C–H Amination

### 4.1. Computational Details and Simplifications

The calculations were performed using the Gaussian 09 D.01 program. Considering the time cost and computing resource for the large system with [Co(P6)], all the structures were optimized at the BP86 (7, 8) level of density functional theory with the basis set LANL2DZ (9, 10) in the gas phase at room temperature. Frequency calculations were performed to verify the transition states. Intrinsic reaction coordinate (IRC) (11) calculations were carried out to make sure that every transition state links relevant intermediates. Due to the large size and conformational complexity of the system under investigation, no efforts have been made to improve the accuracy of single point energies at the B3LYP6 (10)/def2-tzvp (9, 10) level of theory along with Grimme's dispersion correction (D3BJ) (12) and SMD (13) model (in trifluorotoluene).

### 4.2. Transition States of Radical Substitution Step

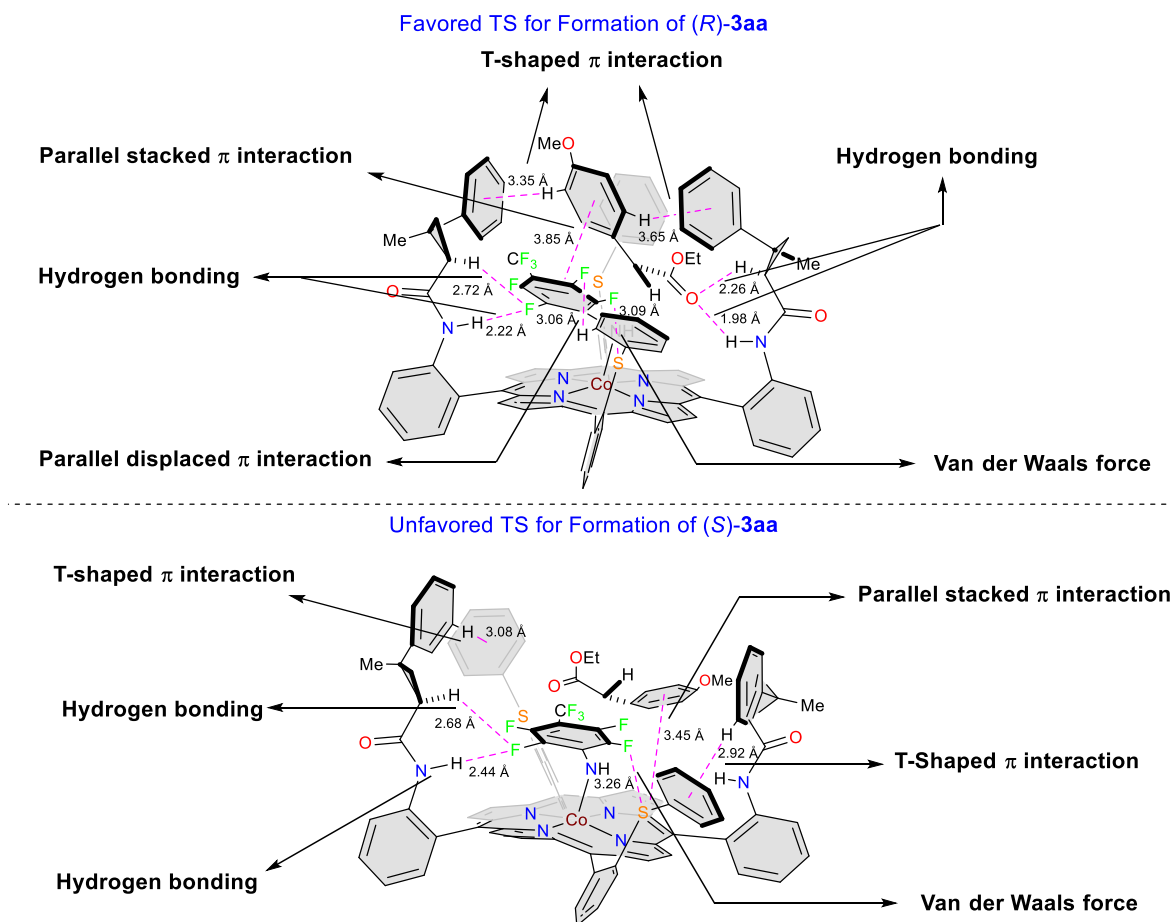

**Figure S1.** DFT-generated stereochemical models for [Co(P6)]-catalyzed C–H amination. Substituents at Bottom Side Omitted for Clarity

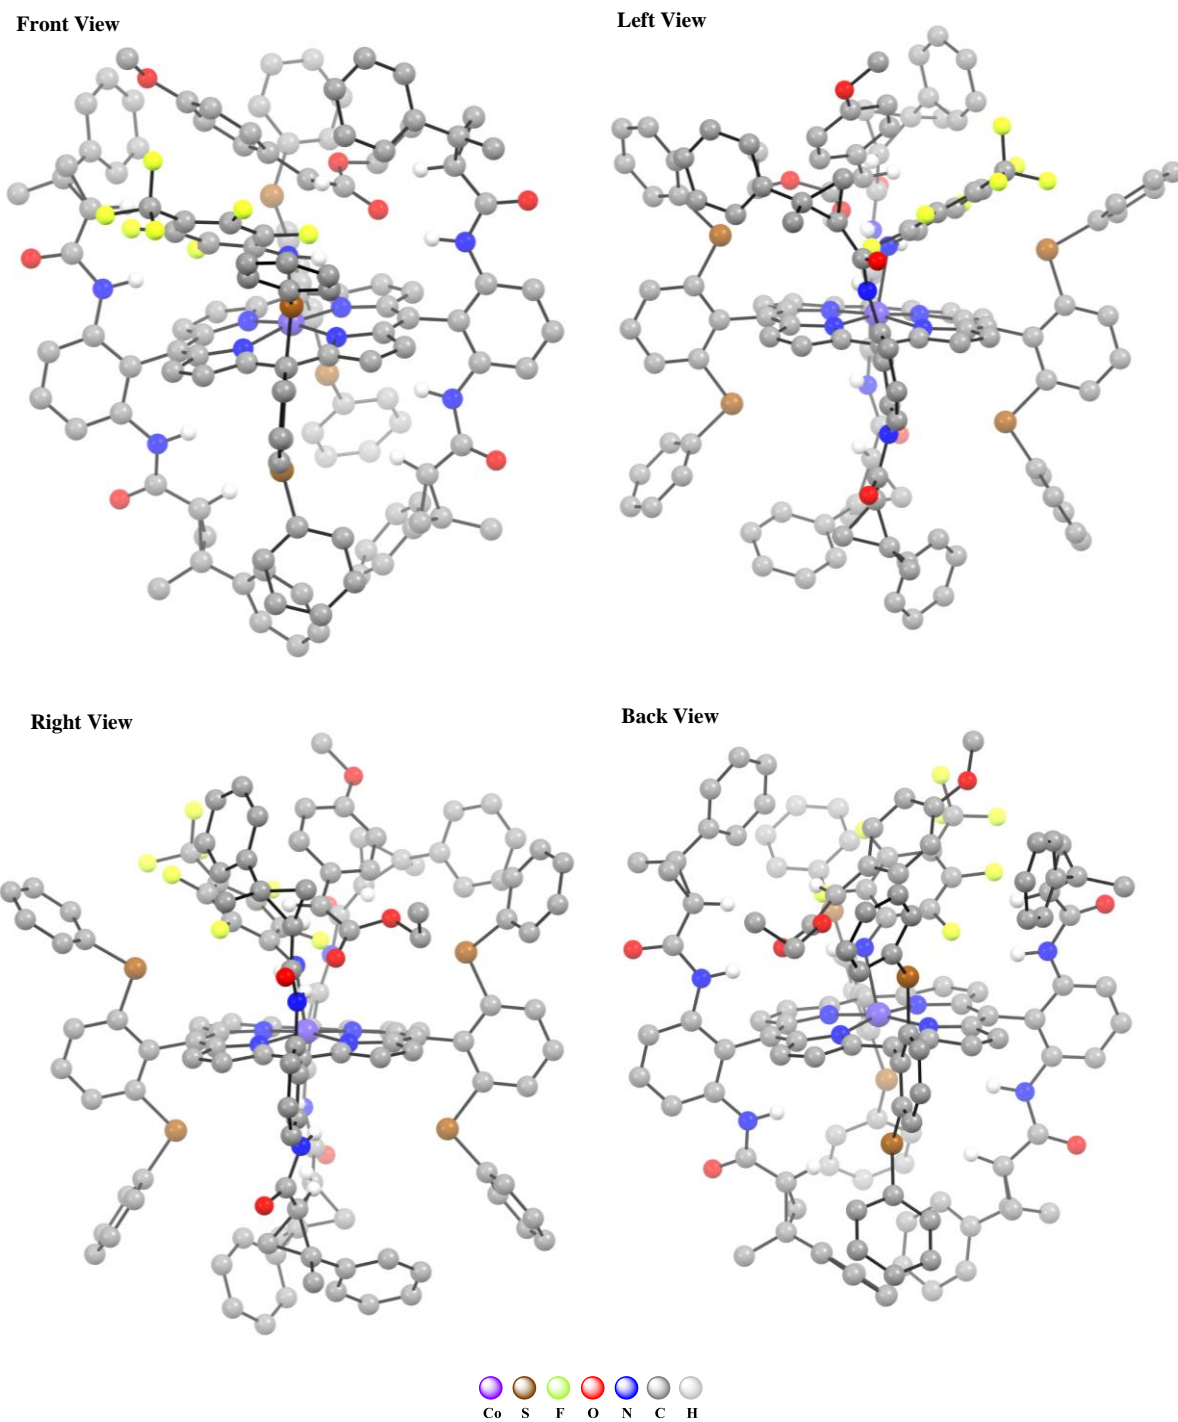

**Figure S2.** Favored transition state structure for formation of (*R*)-**3aa**; ball and stick model; most hydrogen atoms have been omitted for clarity.

Front View

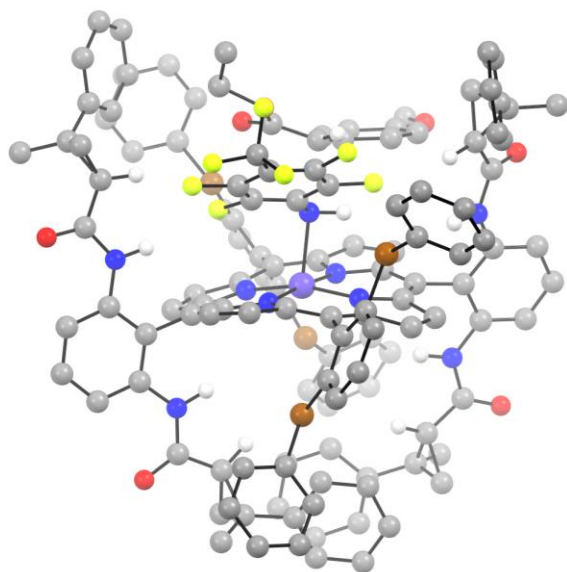

Left View

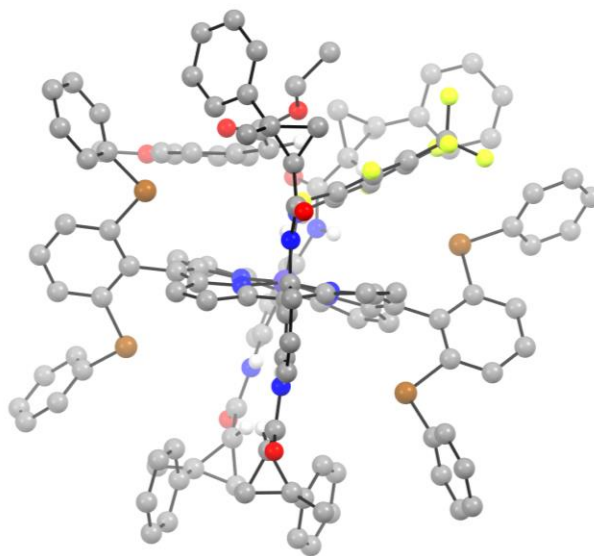

Right View

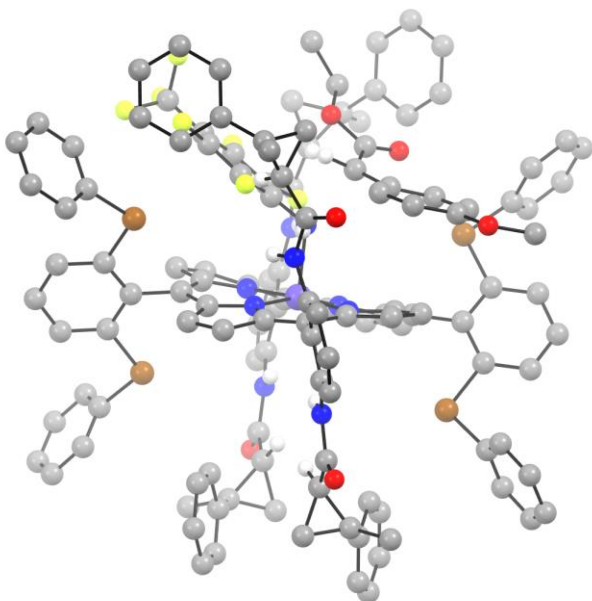

Back View

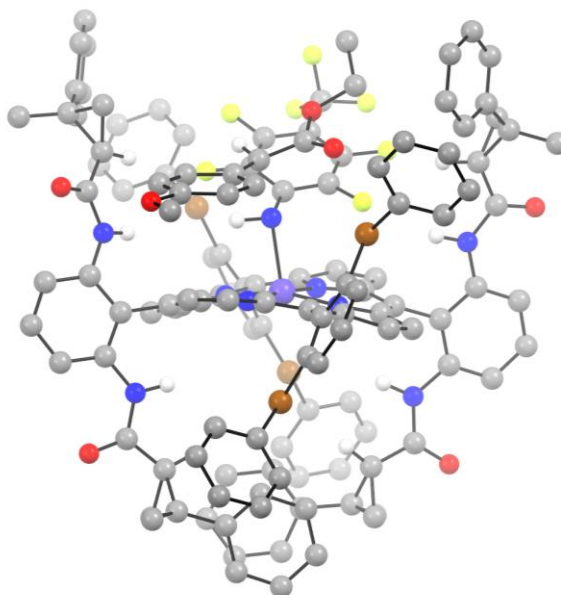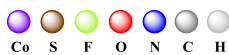

**Figure S3.** Unfavored transition state structure for formation of (*S*)-**3aa**; ball and stick model; most hydrogen atoms have been omitted for clarity.



## XYZ Coordinate

TS for (R)-3aa

G = -6916.656735

|   | XYZ Coordinate |           |           |
|---|----------------|-----------|-----------|
|   | X              | Y         | Z         |
| H | 3.976490       | 10.686526 | -1.150360 |
| C | 3.452595       | 9.728580  | -1.051731 |
| H | 4.120114       | 8.975292  | -2.990130 |
| H | 2.643873       | 10.186610 | 0.924963  |
| C | 3.532687       | 8.767128  | -2.088676 |
| H | -2.462585      | 8.381398  | -2.408236 |
| C | 2.702126       | 9.448721  | 0.116639  |
| H | -7.920704      | 5.468117  | -3.940280 |
| C | -2.146599      | 7.387165  | -2.071996 |
| H | -0.113768      | 8.016713  | -1.619362 |
| C | 2.861821       | 7.525884  | -1.963311 |
| H | -4.094531      | 6.484705  | -2.416280 |
| C | -7.393807      | 5.356411  | -2.986075 |
| C | 2.029393       | 8.209409  | 0.248964  |
| H | -8.920198      | 6.398950  | -1.827709 |
| C | -0.823055      | 7.184263  | -1.631024 |
| C | -3.066722      | 6.318785  | -2.082186 |
| C | -7.956677      | 5.877269  | -1.795890 |
| C | 2.107861       | 7.256476  | -0.795863 |
| C | -6.147167      | 4.683749  | -2.948805 |
| H | 2.929211       | 6.772489  | -2.754345 |
| H | -5.702723      | 4.281310  | -3.865401 |
| H | 1.453989       | 7.979934  | 1.152289  |
| F | 4.377872       | 4.693775  | -3.973472 |
| F | 4.805698       | 2.748731  | -5.039284 |
| C | -7.276203      | 5.718735  | -0.562638 |
| C | -0.415801      | 5.897862  | -1.205639 |
| C | -2.653956      | 5.035231  | -1.653464 |
| C | -5.470589      | 4.531870  | -1.714244 |
| H | -0.737749      | 3.756086  | -3.623267 |
| C | 4.811375       | 3.355291  | -3.775792 |
| H | -7.709877      | 6.116041  | 0.362171  |
| C | -6.033224      | 5.041725  | -0.517753 |
| S | 1.305305       | 5.592469  | -0.582441 |
| C | -1.313972      | 4.786838  | -1.219645 |
| F | 3.777990       | 0.576868  | -4.039908 |

|   |           |           |           |
|---|-----------|-----------|-----------|
| S | -3.856971 | 3.607513  | -1.650560 |
| C | -0.655394 | 2.747471  | -3.220966 |
| H | -0.514916 | 1.391603  | -4.983270 |
| F | 6.191309  | 3.455366  | -3.390243 |
| H | -1.126431 | -1.832494 | -8.568992 |
| C | 3.994315  | 2.635634  | -2.742022 |
| C | -0.544911 | 1.556316  | -3.907124 |
| O | 3.145484  | -1.919783 | -6.820483 |
| H | -7.208174 | 0.127533  | -5.689756 |
| C | -0.996501 | -1.693265 | -7.489602 |
| H | -5.503138 | 4.909207  | 0.431451  |
| H | 1.177504  | -1.916178 | -7.563351 |
| C | 3.509965  | 1.311131  | -2.886388 |
| C | 0.298806  | -1.742079 | -6.941698 |
| C | -2.130908 | -1.493043 | -6.679813 |
| H | -3.135793 | -1.518781 | -7.099678 |
| F | 4.292937  | 4.507153  | -1.216800 |
| C | -0.909172 | 3.389129  | -0.797918 |
| C | 3.738711  | 3.254104  | -1.490602 |
| H | -7.633353 | 2.718209  | -1.203523 |
| C | -0.668078 | 2.426430  | -1.800650 |
| C | -7.350563 | -0.924674 | -5.378611 |
| C | 2.966286  | -2.029173 | -5.563944 |
| C | -8.026706 | 1.776304  | -1.600795 |
| C | 0.472354  | -1.555400 | -5.541928 |
| H | 5.663737  | -1.947225 | -6.071621 |
| H | -6.188692 | 1.288074  | -2.666764 |
| C | -7.209709 | 0.965236  | -2.426410 |
| H | 7.697061  | 4.360349  | 1.490944  |
| H | -8.427476 | -1.160464 | -5.473482 |
| H | -1.446208 | 5.060827  | 1.451477  |
| C | 2.784339  | 0.668792  | -1.868642 |
| C | -9.352216 | 1.382835  | -1.301211 |
| C | -1.962976 | -1.283690 | -5.284714 |
| H | -6.776702 | -1.575428 | -6.057323 |
| H | -9.986178 | 2.017755  | -0.670813 |
| N | 1.747856  | -1.733937 | -4.930750 |
| C | -0.482298 | 0.494300  | -2.911693 |
| C | -0.652210 | -1.254053 | -4.703189 |
| F | 2.431793  | -0.669778 | -2.057509 |
| C | -7.700811 | -0.255899 | -2.952462 |
| C | 4.040670  | -2.536647 | -4.645815 |
| C | 2.987182  | 2.619664  | -0.500129 |

|   |            |            |             |
|---|------------|------------|-------------|
| C | 5.516128   | -2.401453  | -5.085910   |
| C | -6.907218  | -1.117994  | -3.919214   |
| N | -3.105451  | -1.113106  | -4.437270   |
| C | -9.854260  | 0.164756   | -1.823409   |
| H | 4.329334   | -3.811389  | -7.169811   |
| C | 7.062568   | 4.098447   | 2.346431    |
| C | -1.242315  | 4.005026   | 1.622203    |
| H | 5.212937   | 4.772991   | 1.399216    |
| N | -0.513393  | 1.033788   | -1.604784   |
| C | -9.032258  | -0.645705  | -2.637593   |
| C | -0.939694  | 3.048118   | 0.568002    |
| C | 2.451767   | 1.302890   | -0.638707   |
| C | -4.392115  | -1.623136  | -4.680771   |
| H | -2.930726  | -0.704106  | -3.514144   |
| C | -0.481404  | -0.877493  | -3.247414   |
| O | -4.687322  | -2.262791  | -5.742367   |
| C | 5.665030   | 4.330241   | 2.294032    |
| H | -10.881030 | 5 -0.14834 | 1 -1.597567 |
| H | 6.237586   | -2.120728  | -4.311169   |
| H | 1.762657   | -1.710419  | -3.905902   |
| H | 3.844669   | -2.440024  | -3.571726   |
| H | 8.715506   | 3.360380   | 3.564863    |
| F | 2.813252   | 3.248581   | 0.740274    |
| C | -5.397909  | -1.404625  | -3.583534   |
| C | 4.621965   | -4.523421  | -6.381282   |
| C | 7.634478   | 3.539160   | 3.514692    |
| H | -9.419876  | -1.590761  | -3.039780   |
| C | 4.896511   | -3.796397  | -5.055064   |
| H | -5.022273  | -0.962062  | -2.652428   |
| H | 5.676032   | 1.789883   | 0.444728    |
| C | -1.221674  | 3.316930   | 2.815465    |
| C | -6.485488  | -2.504807  | -3.434905   |
| H | 3.814004   | -5.269905  | -6.261500   |
| N | -0.731743  | 1.758552   | 1.110951    |
| H | 7.366008   | 1.197459   | -1.269760   |
| N | 1.794905   | 0.623315   | 0.392632    |
| H | 5.534225   | -5.063321  | -6.699521   |
| C | 4.850656   | 4.009176   | 3.405428    |
| C | -0.388773  | -1.878934  | -2.263765   |
| H | -1.409101  | 3.691952   | 3.820407    |
| C | o -0.30553 | 6 0.05526  | 2 0.128075  |
| H | 1.623766   | 1.273480   | 1.186666    |
| C | 5.720565   | 0.760838   | 0.067573    |

|   |           |           |           |
|---|-----------|-----------|-----------|
| H | -6.433672 | -3.303134 | -4.182842 |
| C | 6.815344  | 3.220692  | 4.624455  |
| H | 8.061144  | 0.405246  | -3.412168 |
| H | -7.001930 | 1.204856  | 1.339229  |
| C | 6.693103  | 0.424785  | -0.887633 |
| C | -0.915065 | 1.927479  | 2.502935  |
| H | 3.770922  | 4.198473  | 3.360876  |
| C | 5.291149  | -4.750539 | -3.943607 |
| C | 5.414504  | 3.451196  | 4.584836  |
| H | 3.826431  | 1.313165  | 1.761924  |
| H | -6.743851 | -2.810125 | -2.415572 |
| H | -0.468330 | -3.699355 | -3.595720 |
| N | -0.285285 | -1.679348 | -0.868238 |
| C | -6.915710 | 1.257230  | 2.429304  |
| C | -0.375001 | -3.299350 | -2.586668 |
| H | 3.245051  | -5.231818 | -3.367490 |
| C | 3.827116  | 0.236378  | 1.547337  |
| H | -5.102482 | -0.080433 | 2.388232  |
| H | -7.166847 | 2.223964  | 2.878615  |
| C | 8.617818  | -0.395876 | -2.891933 |
| H | 7.263668  | 2.800319  | 5.533218  |
| C | 4.306201  | -5.457131 | -3.203386 |
| H | 9.284327  | 0.037855  | -2.123176 |
| C | 4.823917  | -0.219591 | 0.614359  |
| H | 7.427883  | -4.499566 | -4.273411 |
| C | -5.704907 | 0.534641  | 3.068638  |
| C | 6.661053  | -5.044989 | -3.709830 |
| O | -5.506437 | 2.060514  | 4.960674  |
| H | 5.117733  | 4.970591  | 6.934923  |
| H | 3.675896  | 5.207614  | 5.905459  |
| C | -4.958413 | 1.222580  | 4.173037  |
| H | 9.206686  | -0.976971 | -3.615541 |
| C | -0.880110 | 0.910467  | 3.478787  |
| C | 6.782846  | -0.923478 | -1.332758 |
| C | 4.191331  | 4.487995  | 6.569144  |
| C | 3.204338  | -0.504686 | 2.661072  |
| C | 4.548473  | 3.202826  | 5.807484  |
| O | 2.365148  | 0.041794  | 3.440067  |
| N | -3.602537 | 0.866281  | 4.259234  |
| O | 7.690993  | -1.375141 | -2.287535 |
| H | -8.730216 | -0.357243 | 1.001498  |
| C | -0.206804 | -2.981344 | -0.333551 |
| N | -0.437775 | -0.960249 | 1.851318  |

|   |           |           |           |
|---|-----------|-----------|-----------|
| C | -0.246353 | -3.980289 | -1.396289 |
| H | 3.365774  | -3.557651 | 3.837868  |
| C | -8.387336 | -1.301899 | 1.438683  |
| C | -7.186259 | 0.018220  | 3.273734  |
| H | -3.232576 | 0.284925  | 3.501145  |
| H | 2.180294  | -2.260785 | 4.272129  |
| C | -8.789123 | -2.527379 | 0.855168  |
| C | -7.546083 | -1.283564 | 2.580854  |
| C | -1.262294 | 1.278733  | 4.895780  |
| H | 1.346133  | 1.228825  | 4.653656  |
| H | -9.437252 | -2.517283 | -0.029019 |
| C | -2.654995 | 1.301891  | 5.236261  |
| C | 4.680211  | -6.443421 | -2.261218 |
| C | 3.243686  | -2.497329 | 4.101891  |
| O | 3.689155  | -1.785169 | 2.850767  |
| C | -0.651286 | -0.439777 | 3.145448  |
| C | 4.949118  | -1.577969 | 0.154525  |
| C | 7.039944  | -6.033134 | -2.770778 |
| C | 5.908206  | -1.921360 | -0.802544 |
| C | -8.355393 | -3.754663 | 1.408105  |
| C | -7.108214 | -2.522802 | 3.122738  |
| N | 1.083290  | 1.664953  | 5.550831  |
| C | -0.303808 | 1.674601  | 5.887056  |
| H | 3.533361  | 4.269142  | 7.426209  |
| C | 3.496260  | 2.037387  | 5.684304  |
| H | 3.521552  | 1.497599  | 4.733656  |
| C | -3.087454 | 1.725742  | 6.519762  |
| C | -0.307832 | -2.352102 | 2.045533  |
| C | -7.507418 | -3.747909 | 2.543259  |
| H | 3.907682  | -6.978942 | -1.697061 |
| C | -0.189003 | -3.322817 | 1.033135  |
| H | -0.211066 | -5.056333 | -1.233581 |
| C | -7.872426 | 0.189512  | 4.637972  |
| C | 4.746740  | 1.907561  | 6.588754  |
| H | -7.552525 | 1.123664  | 5.127180  |
| C | 6.049282  | -6.741749 | -2.047973 |
| H | -8.666574 | -4.705886 | 0.959794  |
| H | -6.448420 | -2.523615 | 4.000005  |
| H | 4.268446  | -2.336617 | 0.550226  |
| H | 5.519696  | 1.198301  | 6.272922  |
| H | -4.154654 | 1.764597  | 6.740064  |
| H | -8.969484 | 0.207917  | 4.493752  |
| C | 2.149145  | 2.117658  | 6.344540  |

|   |           |           |           |
|---|-----------|-----------|-----------|
| H | 8.101805  | -6.254100 | -2.607765 |
| C | -0.746919 | 2.092241  | 7.175653  |
| C | -2.124104 | 2.117613  | 7.468679  |
| H | -7.159106 | -4.694572 | 2.971137  |
| S | -3.003196 | -4.471961 | 1.527823  |
| C | -0.642617 | -1.507127 | 4.138086  |
| C | 4.128047  | -2.093482 | 5.288065  |
| H | 6.004292  | -2.945931 | -1.176250 |
| H | 3.858977  | -2.708549 | 6.167875  |
| C | -0.420084 | -2.686267 | 3.458892  |
| H | -0.001985 | 2.399213  | 7.910093  |
| H | 4.544800  | 1.943790  | 7.664467  |
| H | -2.451372 | 2.447986  | 8.461386  |
| H | -4.834561 | -6.169394 | -0.048220 |
| H | -7.636130 | -0.656788 | 5.310126  |
| C | -0.197923 | -4.793103 | 1.389104  |
| H | 6.337844  | -7.520029 | -1.331012 |
| H | 5.194314  | -2.268388 | 5.060347  |
| O | 2.014718  | 2.561872  | 7.533978  |
| H | -0.791190 | -1.349987 | 5.205964  |
| H | 3.982687  | -1.033995 | 5.558246  |
| C | -5.021525 | -6.399284 | 1.005969  |
| C | -4.265073 | -5.749961 | 2.010617  |
| S | 2.609544  | -4.706670 | 1.111845  |
| C | -1.436040 | -5.477979 | 1.610171  |
| C | 0.997340  | -5.570341 | 1.434706  |
| H | -0.364026 | -3.700130 | 3.853486  |
| C | -6.014185 | -7.340625 | 1.375732  |
| C | -4.498939 | -6.028630 | 3.379800  |
| H | -6.599696 | -7.844062 | 0.597984  |
| H | -3.913412 | -5.510216 | 4.146722  |
| C | -1.469258 | -6.870743 | 1.857967  |
| C | 3.827723  | -5.716697 | 2.090533  |
| C | -6.245380 | -7.632095 | 2.742217  |
| C | -5.487477 | -6.975063 | 3.743609  |
| C | 0.967477  | -6.968908 | 1.655599  |
| H | 5.306037  | -5.577071 | 0.491424  |
| H | 2.570671  | -6.021955 | 3.853141  |
| C | 5.104442  | -5.920577 | 1.511858  |
| H | -2.423835 | -7.378646 | 2.019432  |
| C | 3.558142  | -6.177751 | 3.404851  |
| C | -0.267866 | -7.610906 | 1.875221  |
| H | -7.012060 | -8.362485 | 3.025620  |

|   |           |           |          |
|---|-----------|-----------|----------|
| H | -5.666606 | -7.193474 | 4.802585 |
| H | 1.896982  | -7.545689 | 1.653986 |
| C | 6.113301  | -6.582237 | 2.253111 |
| C | 4.565016  | -6.858317 | 4.128550 |
| H | -0.298544 | -8.693334 | 2.044469 |
| C | 5.847547  | -7.057222 | 3.559311 |
| H | 7.100974  | -6.731686 | 1.801826 |
| H | 4.349299  | -7.220893 | 5.140435 |
| H | 6.627518  | -7.577052 | 4.127177 |

TS for (S)-**3aa**

G = -6916.653518

| XYZ Coordinate |           |           |           |
|----------------|-----------|-----------|-----------|
|                | X         | Y         | Z         |
| H              | -7.758415 | -8.005923 | 2.128014  |
| H              | -8.206499 | -6.152954 | 0.483397  |
| C              | -6.956134 | -7.313903 | 1.846361  |
| H              | -8.775079 | -4.330560 | 4.082358  |
| C              | -7.208533 | -6.273309 | 0.920008  |
| H              | -9.346176 | -2.086041 | 5.069431  |
| C              | -7.986309 | -3.696712 | 4.504261  |
| C              | -8.305867 | -2.433019 | 5.057083  |
| C              | -5.664486 | -7.458279 | 2.412106  |
| H              | -5.464275 | -8.259170 | 3.133206  |
| C              | -6.172742 | -5.381230 | 0.546098  |
| F              | -6.478084 | -2.866330 | -1.982084 |
| C              | -6.639925 | -4.133647 | 4.486475  |
| H              | -6.362846 | -4.576396 | -0.169538 |
| H              | -6.386412 | -5.104951 | 4.047120  |
| F              | -7.516535 | -0.870842 | -1.673557 |
| C              | -7.282893 | -1.615418 | 5.590459  |
| C              | -6.324229 | -1.465610 | -2.192859 |
| F              | -6.364314 | -1.275924 | -3.582387 |
| C              | -4.627326 | -6.564643 | 2.050764  |
| C              | -4.884244 | -5.535797 | 1.110167  |
| H              | -7.529743 | -0.634682 | 6.017082  |
| F              | -5.767816 | -1.952505 | 0.559673  |
| C              | -5.620026 | -3.315013 | 5.025729  |
| C              | -5.929405 | -2.046468 | 5.580130  |
| H              | -3.821108 | -7.058287 | -0.527779 |
| H              | -3.628170 | -6.665284 | 2.488628  |

|   |           |           |           |
|---|-----------|-----------|-----------|
| H | -5.629276 | -1.342029 | 8.271755  |
| C | -5.089270 | -0.920741 | -1.534109 |
| C | -4.838912 | -1.207982 | -0.165901 |
| H | -4.577352 | -3.656932 | 5.006482  |
| C | -2.891256 | -6.623193 | -0.903312 |
| H | -7.075243 | 7.118790  | -3.409169 |
| S | -3.541023 | -4.325131 | 0.672843  |
| C | -4.675587 | -1.507218 | 7.735632  |
| H | -2.377015 | -8.372141 | -2.085757 |
| H | -4.393398 | -2.568021 | 7.873398  |
| C | -4.867883 | -1.188164 | 6.245627  |
| H | -1.542687 | 2.323790  | 6.131610  |
| H | -6.425386 | 5.459736  | -5.180072 |
| C | -2.073995 | -7.363413 | -1.782247 |
| F | -4.332953 | 0.341601  | -3.495036 |
| H | -5.604443 | 2.876766  | -5.187182 |
| C | -4.152436 | -0.068103 | -2.171891 |
| C | -6.048198 | 6.735415  | -3.449854 |
| C | -1.495352 | 2.826097  | 5.159783  |
| C | -2.506663 | -5.317490 | -0.515928 |
| C | -5.682864 | 5.801029  | -4.447341 |
| C | -3.697278 | -0.731309 | 0.481536  |
| H | -5.374740 | 0.614103  | 4.967039  |
| C | -4.715638 | 0.249319  | 5.761905  |
| H | -2.651758 | 1.333734  | 4.123579  |
| O | -0.263279 | 4.555990  | 6.230652  |
| H | 0.236841  | 9.769339  | -2.971809 |
| F | -3.501233 | -1.030886 | 1.843231  |
| C | -2.094399 | 2.271502  | 4.026845  |
| H | -3.895430 | -0.870693 | 8.184196  |
| C | -4.769368 | 3.096535  | -5.860090 |
| C | -0.814142 | 4.073810  | 5.045892  |
| H | -1.233044 | 10.957812 | -1.311497 |
| H | 0.763482  | 6.015188  | 7.242621  |
| H | -4.872127 | 2.724355  | -6.884809 |
| C | -3.628864 | -0.782953 | 5.357483  |
| C | 0.436978  | 5.853148  | 6.205491  |
| H | -3.666445 | -1.155582 | 4.326683  |
| C | -0.099270 | 9.252599  | -2.065758 |
| C | -5.087430 | 7.179313  | -2.507556 |
| H | -5.367732 | 7.903871  | -1.733498 |
| H | -0.246853 | 6.664559  | 5.892288  |
| C | -0.928570 | 9.920359  | -1.131334 |



|   |           |           |           |
|---|-----------|-----------|-----------|
| C | -0.864604 | -6.820284 | -2.262661 |
| H | -4.395083 | 0.993692  | 6.498752  |
| C | -3.035799 | 0.442932  | -1.495033 |
| C | -2.737863 | 0.119578  | -0.141866 |
| C | -4.355688 | 5.297000  | -4.520109 |
| C | -1.316319 | -4.712192 | -1.025856 |
| C | -2.039548 | 2.926108  | 2.745102  |
| C | -0.722489 | 4.735353  | 3.787496  |
| C | -3.962083 | 4.376451  | -5.661379 |
| C | -3.343111 | 2.982841  | -5.267087 |
| C | 0.288087  | 7.909340  | -1.840609 |
| H | -0.218958 | -7.408590 | -2.920835 |
| H | -3.275503 | 2.787145  | -4.190984 |
| H | 0.917069  | 7.381583  | -2.565523 |
| C | -2.805466 | 2.366043  | 1.657899  |
| C | -2.264425 | -0.623697 | 5.963627  |
| C | -0.490740 | -5.510276 | -1.884335 |
| H | -3.499539 | 1.560259  | 1.921561  |
| C | -1.315941 | 4.161501  | 2.652298  |
| H | -4.221453 | 5.814218  | -7.269777 |
| C | -1.373351 | 9.242002  | 0.029397  |
| C | -3.764320 | 6.677744  | -2.567270 |
| H | 1.315287  | 5.817490  | 5.533873  |
| H | -0.419785 | -5.036563 | 1.517586  |
| H | -2.026580 | -3.481939 | -3.342156 |
| F | -2.233988 | 1.371830  | -2.165432 |
| O | -2.074834 | -0.028889 | 7.076244  |
| C | -0.907425 | -3.292388 | -0.701193 |
| H | -0.183083 | 5.682483  | 3.686574  |
| C | -3.402682 | 5.746878  | -3.569566 |
| C | -3.435306 | 5.134481  | -6.889324 |
| H | -2.023211 | 9.751517  | 0.750264  |
| C | -0.180034 | -3.979286 | 1.618661  |
| C | -1.439015 | -2.605209 | -3.073885 |
| C | -2.296219 | 2.330309  | -6.122809 |
| N | -1.641231 | 0.690329  | 0.523523  |
| O | -2.377480 | 2.321923  | -7.395220 |
| C | -0.149626 | 7.238506  | -0.671692 |
| H | -1.427218 | -1.502103 | 4.267393  |
| H | -3.144009 | 4.435295  | -7.689964 |
| C | -0.933861 | -2.331334 | -1.735067 |
| C | -0.349968 | -2.995862 | 0.560064  |
| N | -1.210194 | -1.156737 | 5.207975  |

|   |           |            |             |
|---|-----------|------------|-------------|
| H | -1.573820 | 0.281880   | 1.477165    |
| C | -0.985687 | 7.899046   | 0.261438    |
| C | -3.265007 | 3.179155   | 0.500396    |
| H | -1.238380 | 4.656459   | 1.679579    |
| H | -3.018406 | 7.003362   | -1.834446   |
| C | 0.323774  | -3.313299  | 2.718362    |
| C | -0.972588 | -1.600797  | -3.896109   |
| S | 0.271494  | 5.444286   | -0.418889   |
| N | -1.240281 | 1.734377   | -5.415874   |
| O | -2.764687 | 4.239430   | 0.047646    |
| H | 0.587628  | -3.716890  | 3.695741    |
| H | -1.312416 | 1.736021   | -4.391998   |
| N | -0.259625 | -1.087010  | -1.707776   |
| H | -2.377560 | 5.358324   | -3.606198   |
| O | -4.452792 | 2.615370   | -0.004251   |
| H | -2.557241 | 5.751519   | -6.620029   |
| N | 0.092760  | -1.723904  | 0.989190    |
| H | -1.107717 | -1.483407  | -4.970409   |
| H | -7.063031 | 3.348557   | -0.075096   |
| S | 1.135833  | -4.785270  | -2.429105   |
| C | 1.384414  | -6.003724  | -4.981163   |
| H | 0.686762  | -5.228193  | -5.314683   |
| C | 0.476325  | -1.915899  | 2.335408    |
| C | 1.766287  | -6.066627  | -3.618588   |
| C | -0.212441 | -0.683335  | -3.058388   |
| H | -0.362835 | -1.473753  | 7.740798    |
| C | 0.152574  | -1.284935  | 5.635780    |
| C | 1.920056  | -6.938359  | -5.900245   |
| H | -1.337019 | 7.364241   | 1.149845    |
| H | 1.628828  | -6.888540  | -6.955569   |
| C | o 0.36715 | 0 -0.07396 | 1 -0.118604 |
| C | 2.687922  | -7.043874  | -3.171642   |
| C | 0.446138  | -1.492133  | 7.009347    |
| C | 2.837635  | -7.923645  | -5.459145   |
| H | -4.940772 | 4.443159   | -0.980436   |
| C | -5.143036 | 3.366316   | -1.110321   |
| C | -6.629730 | 3.021154   | -1.036427   |
| C | 3.222834  | -7.973251  | -4.097323   |
| C | -0.085811 | 1.091760   | -5.957569   |
| C | 0.913763  | -0.907942  | 3.219290    |
| H | 2.988906  | -7.065848  | -2.119313   |
| C | 0.559848  | 0.384145   | -3.564837   |
| H | -0.532226 | 1.576336   | -8.027265   |

|   |           |           |           |
|---|-----------|-----------|-----------|
| H | 3.255968  | -8.641855 | -6.173978 |
| C | 1.196387  | -1.254294 | 4.661601  |
| C | 0.181324  | 1.098735  | -7.355824 |
| N | 1.115036  | 1.332091  | -1.303128 |
| H | 3.941455  | -8.726077 | -3.754041 |
| N | 1.131461  | 0.861431  | 1.448554  |
| C | 1.147372  | 0.416402  | 2.788577  |
| H | -6.803667 | 1.936619  | -1.146046 |
| C | 1.189316  | 1.312624  | -2.712646 |
| C | 0.819269  | 0.452153  | -5.052300 |
| C | 1.980203  | 5.547793  | 0.315527  |
| H | 2.068307  | 7.725793  | 0.355192  |
| H | -7.162572 | 3.541967  | -1.853343 |
| C | 1.798777  | 2.506061  | -0.927110 |
| C | 1.780907  | -1.701004 | 7.404912  |
| C | 1.599564  | 2.190241  | 1.503080  |
| C | 1.965858  | 2.977786  | 0.389988  |
| C | 2.595867  | 6.794238  | 0.579257  |
| C | 1.967407  | 2.445137  | -3.202442 |
| C | 1.555752  | 1.495464  | 3.678679  |
| H | -4.681489 | 3.045477  | -2.061691 |
| C | 2.332537  | 3.187348  | -2.100962 |
| C | 1.349982  | 0.478488  | -7.837676 |
| C | 1.822550  | 2.590322  | 2.885555  |
| H | 2.009321  | -1.857323 | 8.465411  |
| C | 2.640290  | 4.312555  | 0.615645  |
| C | 2.541472  | -1.525479 | 5.088180  |
| H | 1.626647  | 1.404545  | 4.761459  |
| H | 2.180436  | 2.632795  | -4.254054 |
| C | 2.007855  | -0.159498 | -5.577639 |
| C | 2.830575  | -1.737571 | 6.464179  |
| H | 1.549713  | 0.484972  | -8.915605 |
| H | 3.735063  | -4.871241 | 0.344824  |
| H | 2.916284  | 4.105844  | -2.065840 |
| C | 2.270426  | -0.147571 | -6.974395 |
| H | 2.167350  | 3.578093  | 3.185156  |
| H | 2.609751  | -0.758888 | -3.676212 |
| H | 3.628135  | -3.547021 | -1.768091 |
| N | 2.910357  | -0.770998 | -4.655830 |
| C | 3.894900  | 6.832317  | 1.128778  |
| H | 3.245099  | -1.404670 | 3.132044  |
| N | 3.558795  | -1.591260 | 4.090160  |
| C | 4.629947  | -4.779803 | -0.282069 |

|   |          |           |           |
|---|----------|-----------|-----------|
| C | 4.570418 | -4.026565 | -1.479323 |
| C | 3.973917 | 4.391552  | 1.128791  |
| H | 4.371298 | 7.798185  | 1.333667  |
| H | 3.861391 | -1.932848 | 6.761829  |
| H | 3.181018 | -0.619472 | -7.345149 |
| H | 4.659639 | -4.755699 | -4.779442 |
| C | 4.594192 | 5.636137  | 1.390911  |
| C | 4.171795 | -1.328471 | -4.911185 |
| C | 5.834185 | -5.420097 | 0.096737  |
| C | 4.907584 | -1.946963 | 4.252376  |
| H | 5.879193 | -6.011038 | 1.019665  |
| H | 4.508318 | -1.447944 | -2.722158 |
| O | 4.673629 | -1.419452 | -6.079119 |
| C | 5.708661 | -3.896447 | -2.313817 |
| S | 4.915770 | 2.799323  | 1.342761  |
| C | 5.562528 | -4.121165 | -4.852404 |
| C | 4.910112 | -1.790364 | -3.684203 |
| C | 5.656910 | -3.171892 | -3.648229 |
| H | 5.099922 | -2.065989 | 2.045079  |
| O | 5.430258 | -2.181487 | 5.391063  |
| C | 5.685193 | -2.074562 | 2.972809  |
| H | 5.524982 | -3.556827 | -5.799049 |
| H | 5.615025 | 5.668918  | 1.782525  |
| H | 5.785874 | 0.082978  | 1.032909  |
| C | 6.980540 | -5.292145 | -0.727391 |
| H | 6.444340 | -4.789755 | -4.869450 |
| C | 6.915766 | -4.536478 | -1.920174 |
| H | 6.632220 | 0.993968  | -1.133254 |
| C | 6.793421 | -0.181941 | 0.691030  |
| C | 6.454602 | -1.875397 | -3.783866 |
| C | 6.354793 | 3.339156  | 2.389356  |
| C | 7.272910 | 0.333251  | -0.537415 |
| H | 7.718841 | 3.484760  | 0.698017  |
| C | 7.157845 | -1.539173 | 2.848384  |
| C | 6.901894 | -3.037936 | 2.994427  |
| H | 7.920617 | -5.778598 | -0.439537 |
| H | 5.232574 | 3.214418  | 4.252354  |
| C | 7.611610 | 3.577946  | 1.783557  |
| H | 7.028881 | -3.682411 | 2.119031  |
| H | 6.863241 | -1.644016 | -4.773583 |
| C | 6.204765 | 3.427743  | 3.795224  |
| C | 7.600356 | -1.033682 | 1.485667  |
| H | 7.026112 | -1.514315 | -2.923313 |

|   |           |           |           |
|---|-----------|-----------|-----------|
| H | 7.114328  | -3.488331 | 3.970017  |
| H | 7.807631  | -4.431518 | -2.551069 |
| H | 7.538537  | 0.306917  | 3.955673  |
| C | 7.791011  | -0.768143 | 4.016501  |
| H | 7.443090  | -1.161942 | 4.985762  |
| C | 8.573441  | 0.003507  | -0.988215 |
| C | 8.723820  | 3.919496  | 2.591916  |
| C | 8.903103  | -1.363658 | 1.020835  |
| C | 7.318657  | 3.775529  | 4.596799  |
| H | 8.947422  | 0.404969  | -1.937951 |
| C | 9.387610  | -0.851383 | -0.203823 |
| C | 8.578026  | 4.022833  | 3.996322  |
| H | 8.892879  | -0.858777 | 3.968209  |
| H | 9.698619  | 4.097158  | 2.123743  |
| H | 7.204991  | 3.839186  | 5.685092  |
| H | 9.533792  | -2.030347 | 1.623099  |
| H | 10.393930 | -1.118523 | -0.548805 |
| H | 9.440960  | 4.283844  | 4.620000  |

### 4.3. Comparative Study on Intermolecular C–H Amination Reactions of Ethyl Benzene and Arylacetamide

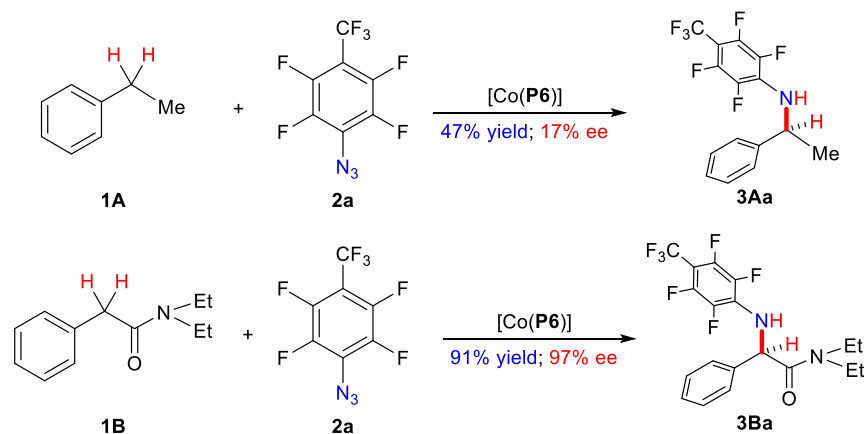

An oven dried Schlenk tube was charged with catalyst ([Co(P6)], 4 mol %) and 4 Å molecular sieves. The Schlenk tube was then evacuated and back filled with nitrogen. The Teflon screw cap was replaced with a rubber septum and **1A** or **1B** (0.1 mmol), azide **2a** (1.5 equiv) and  $\alpha,\alpha,\alpha$ -trifluorotoluene (0.5 mL) were added. The Schlenk tube was then purged with nitrogen for 30 s and the rubber septum was replaced with a Teflon screw cap. The mixture was then stirred at 40 °C for 48 h. Following completion of the reaction, the reaction mixture was concentrated and then directly purified by flash chromatography give the product **3Aa** or **3Ba**.

**3Aa**: Yield: 47%.  $[\alpha]_D^{20} = -8^\circ$  ( $c = 1.0$ ,  $\text{CHCl}_3$ ).  $^1\text{H NMR}$  (600 MHz,  $\text{CDCl}_3$ ):  $\delta$  7.34 (t,  $J = 7.4$  Hz, 2H), 7.30 – 7.22 (m, 3H), 5.01 (m, 1H), 4.43 (d,  $J = 8.6$  Hz, 1H), 1.58 (d,  $J = 6.7$  Hz, 1H).  $^{13}\text{C NMR}$  (126 MHz,  $\text{CDCl}_3$ )  $\delta$  144.78 (dm,  $J = 258.9$  Hz), 143.60, 136.66 (dm,  $J = 240.3$  Hz), 130.29 (m), 128.88, 127.70, 125.43, 121.51 (q,  $J = 272.8$  Hz), 96.52 (m), 54.54 (t,  $J = 4.3$  Hz), 24.58.  $^{19}\text{F NMR}$  (564 MHz,  $\text{CDCl}_3$ )  $\delta$  -55.01 (t,  $J = 20.8$  Hz, 3F), -143.31 (m, 2F), -158.97 (m, 2F). IR (neat,  $\text{cm}^{-1}$ ): 3340, 2930, 1656, 1512, 1334, 1237, 1133, 984, 872. HRMS (DART) ( $[\text{M}]^+$ ) Calcd. for:  $\text{C}_{15}\text{H}_{10}\text{F}_7\text{N}$ : 337.06960, Found: 337.06953. HPLC analysis: ee = 17%. IA (98% hexane: 2% isopropanol, 0.8 ml/min):  $t_{\text{major}} = 5.57$  min,  $t_{\text{minor}} = 5.38$  min.

**3Ba**: Yield: 91%.  $[\alpha]_D^{20} = -135^\circ$  ( $c = 1.0$ ,  $\text{CHCl}_3$ ).  $^1\text{H NMR}$  (600 MHz,  $\text{CDCl}_3$ )  $\delta$  7.39 (m, 2H), 7.35 (t,  $J = 7.4$  Hz, 2H), 7.31 (m, 1H), 6.07 (br, 1H), 5.61 (d,  $J = 8.6$  Hz, 1H), 3.47 (dq,  $J = 13.9$ , 7.1 Hz, 1H), 3.34 (m, 2H), 3.19 (dq,  $J = 14.4$ , 7.0 Hz, 1H), 1.10 (t,  $J = 7.0$  Hz, 3H), 0.94 (t,  $J = 7.0$  Hz, 3H).  $^{13}\text{C NMR}$  (150 MHz,  $\text{CDCl}_3$ )  $\delta$  168.35, 144.78 (dm,  $J = 256.0$  Hz), 137.34, 137.20 (dm,

$J = 239.8$  Hz), 129.70 (m), 129.26, 128.81, 127.48, 121.50 (q,  $J = 272.7, 272.3$  Hz), 97.04 (m), 58.24 (t,  $J = 3.9$  Hz), 41.28, 40.91, 13.47, 12.47.  $^{19}\text{F}$  NMR (564 MHz,  $\text{CDCl}_3$ )  $\delta$  -55.07 (t,  $J = 20.9$  Hz, 3F), -143.50 (m, 2F), -157.60 (m, 2F). IR (neat,  $\text{cm}^{-1}$ ): 3340, 2979, 1652, 1506, 1334, 1133, 979, 883. HRMS (DART) ( $[\text{M}+\text{H}]^+$ ) Calcd. for:  $\text{C}_{19}\text{H}_{18}\text{F}_7\text{N}_2\text{O}$ : 423.13033, Found: 423.13019. HPLC analysis: ee = 97%. IA (80% hexane: 20% isopropanol, 0.5 ml/min):  $t_{\text{major}} = 7.60$  min,  $t_{\text{minor}} = 8.19$  min.

## 5. General Procedure for [Co(P6)] Catalyzed C–H Amination with Fluoroaryl Azides

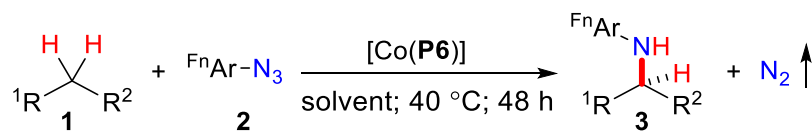

An oven dried Schlenk tube was charged with catalyst ([Co(**P6**)], 4 mol %) and 4 Å molecular sieves. The Schlenk tube was then evacuated and back filled with nitrogen. The Teflon screw cap was replaced with a rubber septum and C–H substrate (0.1 mmol), azide (1.2 or 1.5 equiv) and solvent ( $\alpha,\alpha,\alpha$ -trifluorotoluene or benzene) (0.5 mL) were added. The Schlenk tube was then purged with nitrogen for 30 s and the rubber septum was replaced with a Teflon screw cap. The mixture was then stirred at 40 °C for 48 h. Following completion of the reaction, the reaction mixture was concentrated and then directly purified by flash chromatography.

### 5.1. Enantioselective C–H Amination of 1a with Various Fluoroaryl Azides

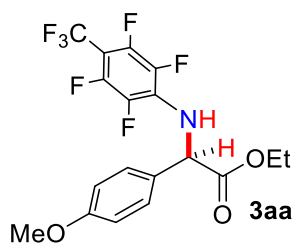

**Ethyl (R)-2-(4-methoxyphenyl)-2-((2,3,5,6-tetrafluoro-4-(trifluoromethyl)phenyl)amino)acetate **3aa**** was obtained through the general procedure using 1.5 equiv of azide with  $\alpha,\alpha,\alpha$ -trifluorotoluene as solvent. Yield: 95%.  $[\alpha]_D^{20} = -90^\circ$  ( $c = 1.0$ ,  $\text{CHCl}_3$ ).  $^1\text{H NMR}$  (600 MHz,  $\text{CDCl}_3$ ):  $\delta$  7.29 (d,  $J = 8.4$  Hz, 2H), 6.88 (d,  $J = 7.8$  Hz, 2H), 5.42 (m, 2H), 4.25 (m, 2H), 3.80 (s, 3H), 1.22 (t,  $J = 7.1$  Hz, 3H).  $^{13}\text{C NMR}$  (150 MHz,  $\text{CDCl}_3$ )  $\delta$  171.03, 160.00, 144.77 (dm,  $J = 249.9$  Hz), 136.93 (dm,  $J = 241.6$  Hz), 129.25 (t,  $J = 11.1$  Hz), 128.65, 128.15, 121.44 (q,  $J = 272.8$  Hz), 114.50, 97.39 (m), 62.30, 60.06, 55.25.  $^{19}\text{F NMR}$  (564 MHz,  $\text{CDCl}_3$ )  $\delta$  -55.11 (t,  $J = 20.9$  Hz, 3F), -143.03 (m, 2F), -158.56 (m, 2F). IR (neat,  $\text{cm}^{-1}$ ): 3387, 2915, 2848, 1737, 1657, 1509, 1332, 1235, 1176, 1131, 713. HRMS (ESI-negative) ( $[\text{M}-\text{H}]^-$ ) Calcd. for:  $\text{C}_{18}\text{H}_{13}\text{F}_7\text{NO}_3$ : 424.0784, Found: 424.0793. HPLC analysis: ee = 97%. Whelk (99.5% hexane: 0.5% isopropanol, 1 ml/min):  $t_{\text{major}} = 7.48$  min,  $t_{\text{minor}} = 9.68$  min.



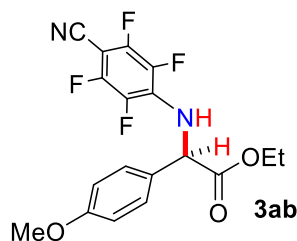

**Ethyl (R)-2-((4-cyano-2,3,5,6-tetrafluorophenyl)amino)-2-(4-methoxyphenyl)acetate 3ab** was obtained through the general procedure using 1.5 equiv of azide with  $\alpha,\alpha,\alpha$ -trifluorotoluene as solvent. Yield: 53%.  $[\alpha]_D^{20} = -200^\circ$  ( $c = 1.0$ ,  $\text{CHCl}_3$ ).  $^1\text{H NMR}$  (600 MHz,  $\text{CDCl}_3$ )  $\delta$  7.26 (d,  $J = 8.6$  Hz, 2H), 6.87 (d,  $J = 8.5$  Hz, 2H), 5.66 (br, 1H), 5.42 (d,  $J = 7.5$  Hz, 1H), 4.20 (m, 2H), 3.79 (s, 3H), 1.20 (t,  $J = 7.1$  Hz, 3H).  $^{13}\text{C NMR}$  (100 MHz,  $\text{CDCl}_3$ )  $\delta$  170.71, 160.08, 147.58 (dm,  $J = 254.7$  Hz), 135.99 (dm,  $J = 245.8$  Hz), 131.30 (m), 128.30, 128.11, 114.55, 108.53 (t,  $J = 3.6$  Hz), 80.82 (t,  $J = 17.7$  Hz), 62.49, 59.95, 55.27, 13.93.  $^{19}\text{F NMR}$  (470 MHz,  $\text{CDCl}_3$ )  $\delta$  -134.81 (m, 2F), -157.67 (m, 2F). IR (neat,  $\text{cm}^{-1}$ ): 3383, 2983, 2235, 1737, 1656, 1510, 1178, 837. HRMS (DART) ( $[\text{M}+\text{NH}_4]^+$ ) Calcd. for:  $\text{C}_{18}\text{H}_{18}\text{F}_4\text{N}_3\text{O}_3$ : 400.12788, Found: 400.12793. HPLC analysis: ee = 90%. IC (90% hexane: 10% isopropanol, 0.8 ml/min):  $t_{\text{major}} = 22.20$  min,  $t_{\text{minor}} = 23.52$  min.

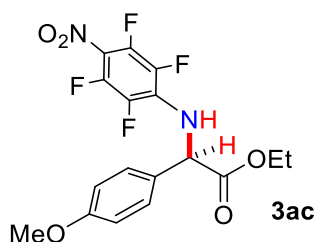

**Ethyl (R)-2-(4-methoxyphenyl)-2-((2,3,5,6-tetrafluoro-4-nitrophenyl)amino)acetate 3ac** was obtained through the general procedure using 1.5 equiv of azide with  $\alpha,\alpha,\alpha$ -trifluorotoluene as solvent. Yield: 60%.  $[\alpha]_D^{20} = -245^\circ$  ( $c = 1.0$ ,  $\text{CHCl}_3$ ).  $^1\text{H NMR}$  (600 MHz,  $\text{CDCl}_3$ )  $\delta$  7.26 (d,  $J = 8.2$  Hz, 2H), 6.88 (d,  $J = 9.0$  Hz, 2H), 5.65 (d,  $J = 8.4$  Hz, 1H), 5.41 (d,  $J = 8.4$  Hz, 1H), 4.22 (m, 2H), 3.79 (s, 3H), 1.21 (t,  $J = 6.9$  Hz, 3H).  $^{13}\text{C NMR}$  (150 MHz,  $\text{CDCl}_3$ )  $\delta$  173.34, 162.77, 144.86 (dm,  $J = 261.3$  Hz), 138.83 (dm,  $J = 243.6$  Hz), 132.97 (t,  $J = 10.7$  Hz), 130.86, 130.74, 122.72, 117.22, 65.19, 62.63, 57.90, 16.61.  $^{19}\text{F NMR}$  (564 MHz,  $\text{CDCl}_3$ )  $\delta$  -146.96 (m, 2F), -158.46 (m, 2F). IR (neat,  $\text{cm}^{-1}$ ): 3379, 2983, 1737, 1640, 1549, 1334, 1177, 1027, 769. HRMS (DART) ( $[\text{M}+\text{H}]^+$ ) Calcd. for:  $\text{C}_{17}\text{H}_{15}\text{F}_4\text{N}_2\text{O}_5$ : 403.09116, Found: 403.09007. HPLC analysis: ee = 96%. IC (90% hexane: 10% isopropanol, 0.8 ml/min):  $t_{\text{major}} = 18.12$  min,  $t_{\text{minor}} = 18.83$  min.

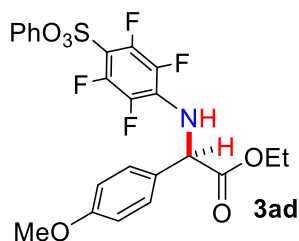

**Ethyl (R)-2-(4-methoxyphenyl)-2-((2,3,5,6-tetrafluoro-4-(phenoxysulfonyl)phenyl amino) acetate 3ad** was obtained through the general procedure using 1.5 equiv of azide with  $\alpha,\alpha,\alpha$ -trifluorotoluene as solvent. Yield: 60%.  $[\alpha]_D^{20} = -67^\circ$  ( $c = 1.0$ ,  $\text{CHCl}_3$ ).  $^1\text{H NMR}$  (500 MHz,  $\text{CDCl}_3$ )  $\delta$  7.33 (t,  $J = 7.5$  Hz, 2H), 7.27 – 7.32 (m, 3H), 7.13 (d,  $J = 8.0$  Hz, 2H), 6.89 (d,  $J = 8.2$  Hz, 2H), 5.67 (d,  $J = 7.3$  Hz, 1H), 5.42 (d,  $J = 7.3$  Hz, 1H), 4.21 (m, 2H), 3.81 (s, 3H), 1.21 (t,  $J = 7.1$  Hz, 3H).  $^{13}\text{C NMR}$  (100 MHz,  $\text{CDCl}_3$ )  $\delta$  170.70, 160.08, 149.10, 145.45 (dm,  $J = 260.8$  Hz), 136.93 (dm,  $J = 246.1$  Hz), 131.71 (m), 129.92, 128.28, 128.13, 127.59, 121.70, 114.55, 102.01 (m), 62.50, 59.93, 55.29, 13.93.  $^{19}\text{F NMR}$  (470 MHz,  $\text{CDCl}_3$ )  $\delta$  -136.72 (m, 2F), -157.89 (m, 2F). IR (neat,  $\text{cm}^{-1}$ ): 3383, 2936, 1737, 1636, 1501, 1200, 1144, 777. HRMS (DART) ( $[\text{M}+\text{NH}_4]^+$ ) Calcd. for:  $\text{C}_{23}\text{H}_{23}\text{F}_4\text{N}_2\text{O}_6\text{S}$ : 531.12075, Found: 531.12103. HPLC analysis: ee = 87%. ODH (95% hexane: 5% isopropanol, 0.8 ml/min):  $t_{\text{major}} = 25.48$  min,  $t_{\text{minor}} = 27.93$  min.

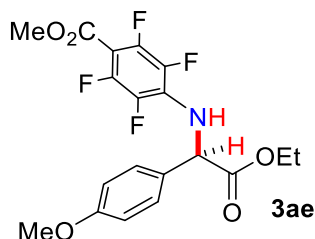

**Methyl (R)-4-((2-ethoxy-1-(4-methoxyphenyl)-2-oxoethyl)amino)-2,3,5,6-tetrafluorobenzoate 3ae** was obtained through the general procedure using 1.5 equiv of azide with  $\alpha,\alpha,\alpha$ -trifluorotoluene as solvent. Yield: 87%.  $[\alpha]_D^{20} = -212^\circ$  ( $c = 1.0$ ,  $\text{CHCl}_3$ ).  $^1\text{H NMR}$  (600 MHz,  $\text{CDCl}_3$ )  $\delta$  7.27 (d,  $J = 8.6$  Hz, 2H), 6.86 (d,  $J = 8.6$  Hz, 2H), 5.40 (m, 2H), 4.19 (m, 2H), 3.87 (s, 3H), 3.78 (s, 3H), 1.20 (t,  $J = 7.1$  Hz, 3H).  $^{13}\text{C NMR}$  (125 MHz,  $\text{CDCl}_3$ )  $\delta$  171.07, 160.90 (t,  $J = 3.0$  Hz), 159.92, 146.17 (dm,  $J = 253.4$  Hz), 136.84 (dm,  $J = 238.9$  Hz), 129.07 (m), 128.75, 128.14, 114.43, 99.86 (t,  $J = 14.3$  Hz), 62.22, 60.13, 55.24, 52.52, 13.94.  $^{19}\text{F NMR}$  (564 MHz,  $\text{CDCl}_3$ )  $\delta$  -140.24 (m, 2F), -159.03 (m, 2F). IR (neat,  $\text{cm}^{-1}$ ): 3385, 2957, 2840, 1731, 1652, 1512, 1232, 1180, 1026. HRMS (DART) ( $[\text{M}+\text{NH}_4]^+$ ) Calcd. for:  $\text{C}_{19}\text{H}_{21}\text{F}_4\text{N}_2\text{O}_5$ : 433.13811, Found: 433.13813. HPLC

analysis: ee = 96%. IC (90% hexane: 10% isopropanol, 0.8 ml/min):  $t_{major}$  = 18.16 min,  $t_{minor}$  = 19.37 min.

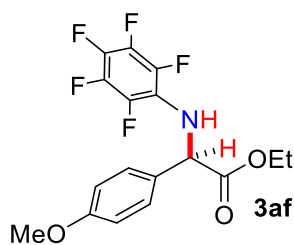

**Ethyl (*R*)-2-(4-methoxyphenyl)-2-((perfluorophenyl)amino)acetate 3af** was obtained through the general procedure using 1.5 equiv of azide with  $\alpha,\alpha,\alpha$ -trifluorotoluene as solvent. Yield: 72%.  $[\alpha]_D^{20}$  =  $-60^\circ$  ( $c$  = 0.5,  $\text{CHCl}_3$ ).  $^1\text{H}$  NMR (500 MHz,  $\text{CDCl}_3$ ):  $\delta$  7.26 (d,  $J$  = 8.5 Hz, 2H), 6.85 (d,  $J$  = 8.5 Hz, 2H), 5.26 (d,  $J$  = 9.0 Hz, 1H), 4.88 (br, 1H), 4.19 (m, 2H), 3.78 (s, 3H), 1.21 (t,  $J$  = 7.0 Hz, 3H).  $^{13}\text{C}$  NMR (125 MHz,  $\text{CDCl}_3$ ):  $\delta$  171.50, 159.81, 138.32 (dm,  $J$  = 238.8 Hz), 137.95 (dm,  $J$  = 246.0 Hz), 134.22 (dm,  $J$  = 244.1 Hz), 128.86, 128.19, 121.56 (m), 114.35, 62.01, 60.88 (t,  $J$  = 3.6 Hz), 55.22, 13.96.  $^{19}\text{F}$  NMR (376 MHz,  $\text{CFCl}_3$ ,  $\text{CDCl}_3$ ):  $\delta$ . -158.03 (m, 2F), -164.50 (m, 2F), -170.12 (m, 1F). IR (neat,  $\text{cm}^{-1}$ ): 3379, 2938, 1736, 1611, 1511, 1247, 1176, 1022, 967, 836. HRMS (ESI-negative) ( $[\text{M}-\text{H}]^-$ ) Calcd. for:  $\text{C}_{17}\text{H}_{13}\text{F}_5\text{NO}_3$ : 374.0816, Found: 374.0826. HPLC analysis: ee = 95%. Whelk (99% hexane: 1% isopropanol, 1 ml/min):  $t_{major}$  = 6.59 min,  $t_{minor}$  = 7.90 min.

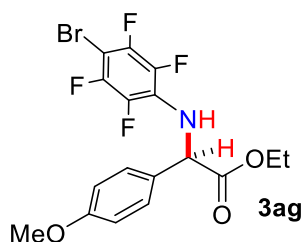

**Ethyl (*R*)-2-((4-bromo-2,3,5,6-tetrafluorophenyl)amino)-2-(4-methoxyphenyl)acetate 3ag** was obtained through the general procedure using 1.5 equiv of azide with  $\alpha,\alpha,\alpha$ -trifluorotoluene as solvent. Yield: 64%.  $[\alpha]_D^{20}$  =  $-54^\circ$  ( $c$  = 1.0,  $\text{CHCl}_3$ ).  $^1\text{H}$  NMR (500 MHz,  $\text{CDCl}_3$ ):  $\delta$  7.28 (d,  $J$  = 8.5 Hz, 2H), 6.86 (d,  $J$  = 8.0 Hz, 2H), 5.34 (d,  $J$  = 8.5 Hz, 1H), 5.13 (d,  $J$  = 8.5 Hz, 1H), 4.24 (m, 2H), 3.78 (s, 3H), 1.21 (t,  $J$  = 7.0 Hz, 3H).  $^{13}\text{C}$  NMR (125 MHz,  $\text{CDCl}_3$ ):  $\delta$  171.35, 159.84, 145.08 (dm,  $J$  = 243.0 Hz), 138.01 (dm,  $J$  = 241.7 Hz), 131.11, 128.91, 128.18, 125.34 (t,  $J$  = 12.3 Hz), 114.37,

86.91 (t,  $J = 23.0$  Hz), 62.07, 60.50 (t,  $J = 3.9$  Hz), 55.22, 13.96.  $^{19}\text{F}$  NMR (376 MHz,  $\text{CFCl}_3$ ,  $\text{CDCl}_3$ ):  $\delta$  -136.17 (m, 2F), -156.76 (m, 2F). IR (neat,  $\text{cm}^{-1}$ ): 3382, 2936, 1735, 1641, 1494, 1248, 1177, 1032, 947, 833, 796, 622, 529. HRMS (ESI-negative) ( $[\text{M}-\text{H}]^-$ ) Calcd. for:  $\text{C}_{17}\text{H}_{13}\text{BrF}_4\text{NO}_3$ : 434.0015, Found: 434.0026. HPLC analysis: ee = 95%. ADH (99% hexane: 1% isopropanol, 1 ml/min):  $t_{\text{major}} = 7.79$  min,  $t_{\text{minor}} = 8.46$  min.

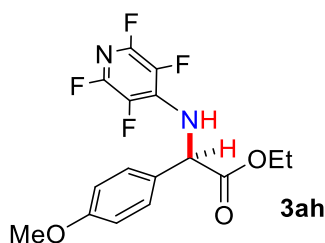

**Ethyl (R)-2-(4-methoxyphenyl)-2-((perfluoropyridin-4-yl)amino)acetate 3ah** was obtained through the general procedure using 1.5 equiv of azide with  $\alpha,\alpha,\alpha$ -trifluorotoluene as solvent. Yield: 87%.  $[\alpha]_D^{20} = -97^\circ$  ( $c = 1.0$ ,  $\text{CHCl}_3$ ).  $^1\text{H}$  NMR (500 MHz,  $\text{CDCl}_3$ ):  $\delta$  7.29 (d,  $J = 9.0$  Hz, 2H), 6.89 (d,  $J = 8.5$  Hz, 2H), 5.74 (m, 1H), 5.47 (d,  $J = 7.5$  Hz, 1H), 4.27 (m, 2H), 3.80 (s, 3H), 1.22 (t,  $J = 7.5$  Hz, 3H).  $^{13}\text{C}$  NMR (125 MHz,  $\text{CDCl}_3$ ):  $\delta$  170.69, 160.07, 144.05 (td,  $J = 15.5$ , 235.4 Hz), 135.76 (m), 131.47 (dm,  $J = 246.4$  Hz), 128.38, 128.13, 114.54, 62.45, 59.61 (t,  $J = 3.8$  Hz), 55.28, 13.93.  $^{19}\text{F}$  NMR (376 MHz,  $\text{CFCl}_3$ ,  $\text{CDCl}_3$ ):  $\delta$  -93.85 (m, 2F), -162.63 (m, 2F). IR (neat,  $\text{cm}^{-1}$ ): 3386, 2939, 1736, 1646, 1479, 1248, 1151, 1030, 940, 836, 727, 624. HRMS (ESI-negative) ( $[\text{M}-\text{H}]^-$ ) Calcd. for:  $\text{C}_{16}\text{H}_{13}\text{F}_4\text{N}_2\text{O}_3$ : 357.0862, Found: 357.0873. HPLC analysis: ee = 93%. Whelk (97% hexane: 3% isopropanol, 1 ml/min):  $t_{\text{major}} = 8.47$  min,  $t_{\text{minor}} = 9.62$  min.

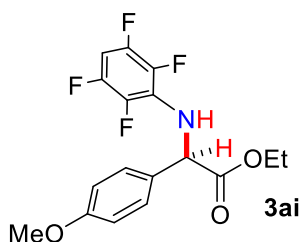

**Ethyl (R)-2-(4-methoxyphenyl)-2-((2,3,5,6-tetrafluorophenyl)amino)acetate 3ai** was obtained through the general procedure using 1.5 equiv of azide with  $\alpha,\alpha,\alpha$ -trifluorotoluene as solvent. Yield: 34%.  $[\alpha]_D^{20} = -110^\circ$  ( $c = 0.5$ ,  $\text{CHCl}_3$ ).  $^1\text{H}$  NMR (500 MHz,  $\text{CDCl}_3$ ):  $\delta$  7.29 (d,  $J = 8.5$  Hz, 2H), 6.86 (d,  $J = 8.0$  Hz, 2H), 6.39 (m, 1H), 5.36 (d,  $J = 9.0$  Hz, 1H), 5.08 (d,  $J = 8.8$  Hz, 1H), 4.25 (dq,  $J =$

10.8, 7.1 Hz, 1H), 4.14 (dq,  $J = 10.8, 7.1$  Hz, 1H), 3.78 (s, 3H), 1.21 (t,  $J = 7.0$  Hz, 3H).  $^{13}\text{C}$  NMR (125 MHz,  $\text{CDCl}_3$ ):  $\delta$  171.54, 159.76, 146.32 (dm,  $J = 243.0$  Hz), 137.70 (dm,  $J = 238.6$  Hz), 129.19, 128.21, 126.28 (m), 114.32, 94.68 (t,  $J = 23.1$  Hz), 61.97, 60.59 (t,  $J = 4.1$  Hz), 55.24, 13.98.  $^{19}\text{F}$  NMR (376 MHz,  $\text{CFCl}_3$ ,  $\text{CDCl}_3$ ):  $\delta$  -141.45 (m, 2F), -158.70 (m, 2F). IR (neat,  $\text{cm}^{-1}$ ): 3384, 2937, 1735, 1651, 1610, 1510, 1459, 1248, 1176, 1031, 920, 797, 711. HRMS (ESI-negative) ( $[\text{M}-\text{H}]^-$ ) Calcd. for:  $\text{C}_{17}\text{H}_{14}\text{F}_4\text{NO}_3$ : 356.0910, Found: 356.0918. HPLC analysis: ee = 91%. Whelk (99% hexane: 1% isopropanol, 1 ml/min):  $t_{\text{major}} = 7.23$  min,  $t_{\text{minor}} = 8.94$  min.

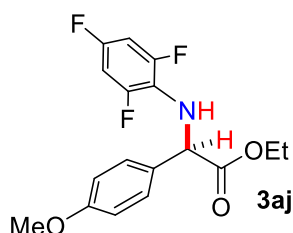

**Ethyl (R)-2-(4-methoxyphenyl)-2-((2,4,6-trifluorophenyl)amino)acetate 3aj** was obtained through the general procedure using 1.5 equiv of azide with  $\alpha,\alpha,\alpha$ -trifluorotoluene as solvent. Yield: 30%.  $[\alpha]_D^{20} = -76^\circ$  ( $c = 0.5$ ,  $\text{CHCl}_3$ ).  $^1\text{H}$  NMR (500 MHz,  $\text{CDCl}_3$ ):  $\delta$  7.28 (d,  $J = 7.8$  Hz, 2H), 6.84 (d,  $J = 7.5$  Hz, 2H), 6.55 (t,  $J = 7.8$  Hz, 2H), 5.23 (d,  $J = 8.8$  Hz, 1H), 4.64 (d,  $J = 9.4$  Hz, 1H), 4.17 (m, 2H), 3.77 (s, 3H), 1.20 (t,  $J = 7.0$  Hz, 3H).  $^{13}\text{C}$  NMR (125 MHz,  $\text{CDCl}_3$ ):  $\delta$  172.01, 159.58, 156.15 – 154.11 (m, 2C), 129.53, 128.24, 120.23 (m), 114.14, 100.18 (m), 61.66, 61.44 (t,  $J = 3.8$  Hz), 55.20, 14.00.  $^{19}\text{F}$  NMR (376 MHz,  $\text{CFCl}_3$ ,  $\text{CDCl}_3$ ):  $\delta$  -120.48 (t,  $J = 8.6$  Hz, 1F), -124.21 (m, 2F). IR (neat,  $\text{cm}^{-1}$ ): 3457, 2962, 1735, 1609, 1508, 1442, 1247, 1175, 1114, 1032, 995, 833, 571. HRMS (ESI-negative) ( $[\text{M}-\text{H}]^-$ ) Calcd. for:  $\text{C}_{17}\text{H}_{15}\text{F}_3\text{NO}_3$ : 338.1004, Found: 338.1000. HPLC analysis: ee = 49%. OJH (99% hexane: 1% isopropanol, 1 ml/min):  $t_{\text{major}} = 12.51$  min,  $t_{\text{minor}} = 18.37$  min.

## 5.2. Enantioselective C–H Amination of Various Arylacetate Esters with 2a

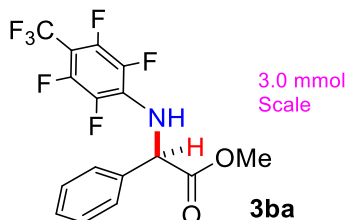

**Methyl (*R*)-2-phenyl-2-((2,3,5,6-tetrafluoro-4-(trifluoromethyl)phenyl)amino)acetate 3ba** was obtained through the general procedure on 3 mmol scale using 1.5 equiv of azide with  $\alpha,\alpha,\alpha$ -trifluorotoluene as solvent. Yield: 75%.  $[\alpha]_D^{20} = -97^\circ$  ( $c = 1.0$ ,  $\text{CHCl}_3$ ).  $^1\text{H NMR}$  (500 MHz,  $\text{CDCl}_3$ ):  $\delta$  7.36 (m, 5H), 5.49 (m, 2 H), 3.76 (s, 3H).  $^{13}\text{C NMR}$  (125 MHz,  $\text{CDCl}_3$ ):  $\delta$  171.29, 144.86 (dm,  $J = 254.75$  Hz), 137.03 (dm,  $J = 239.38$  Hz), 136.50, 129.20, 129.07, 126.93, 121.41 (q,  $J = 271.1$  Hz), 97.60 (m), 60.54 (t,  $J = 4.1$  Hz), 53.21.  $^{19}\text{F NMR}$  (376 MHz,  $\text{CFCl}_3$ ,  $\text{CDCl}_3$ ):  $\delta$  -55.60 (t,  $J = 20.7$  Hz, 3F), -143.31 (m, 2F), -158.98 (m, 2F). IR (neat,  $\text{cm}^{-1}$ ): 3390, 2959, 1742, 1656, 1508, 1331, 1293, 1236, 1177, 1129, 1069, 967, 875, 698. HRMS (ESI-negative) ( $[\text{M}-\text{H}]^-$ ) Calcd. for:  $\text{C}_{16}\text{H}_9\text{F}_7\text{NO}_2$ : 380.0522, Found: 380.0527. HPLC analysis: ee = 96%. ODH (99% hexane: 1% isopropanol, 1 ml/min):  $t_{\text{major}} = 5.99$  min,  $t_{\text{minor}} = 7.16$  min.

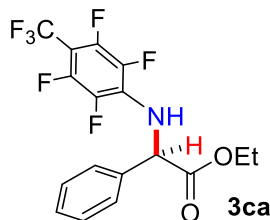

**Ethyl (*R*)-2-phenyl-2-((2,3,5,6-tetrafluoro-4-(trifluoromethyl)phenyl)amino)acetate 3ca** was obtained through the general procedure using 1.5 equiv of azide with  $\alpha,\alpha,\alpha$ -trifluorotoluene as solvent. Yield: 82%.  $[\alpha]_D^{20} = -84^\circ$  ( $c = 1.0$ ,  $\text{CHCl}_3$ ).  $^1\text{H NMR}$  (500 MHz,  $\text{CDCl}_3$ ):  $\delta$  7.38 – 7.34 (m, 5H), 5.48 (m, 2H), 4.27 (m, 2H), 1.22 (t,  $J = 7.0$  Hz, 3H).  $^{13}\text{C NMR}$  (125 MHz,  $\text{CDCl}_3$ ):  $\delta$  170.77, 144.84 (dm,  $J = 257.5$  Hz), 136.96 (dm,  $J = 241.3$  Hz), 136.65, 129.12, 128.96, 126.88, 121.42 (q,  $J = 269.9$  Hz), 62.43, 60.61 (t,  $J = 4$  Hz), 13.92.  $^{19}\text{F NMR}$  (376 MHz,  $\text{CFCl}_3$ ,  $\text{CDCl}_3$ ):  $\delta$  -55.58 (t,  $J = 20.7$  Hz, 3F), -143.38 (m, 2F), -159.05 (m, 2F). IR (neat,  $\text{cm}^{-1}$ ): 3396, 2973, 1736, 1505, 1291, 1134, 954, 696. HRMS (ESI-negative) ( $[\text{M}-\text{H}]^-$ ) Calcd. for:  $\text{C}_{17}\text{H}_{11}\text{F}_7\text{NO}_2$ : 394.0678, Found:

394.0687. HPLC analysis: ee = 95%. ODH (97% hexane: 3% isopropanol, 1 ml/min):  $t_{major}$  = 8.38 min,  $t_{minor}$  = 9.16 min.

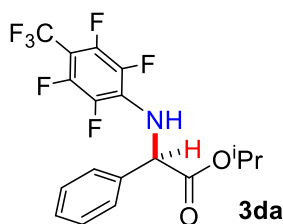

**Isopropyl (*R*)-2-phenyl-2-((2,3,5,6-tetrafluoro-4-(trifluoromethyl)phenyl)amino)acetate 3da** was obtained through the general procedure using 1.5 equiv of azide with  $\alpha,\alpha,\alpha$ -trifluorotoluene as solvent. Yield: 61%.  $[\alpha]_D^{20} = -199^\circ$  ( $c = 1.0$ ,  $\text{CHCl}_3$ ).  $^1\text{H NMR}$  (500 MHz,  $\text{CDCl}_3$ ):  $\delta$  7.40 – 7.31 (m, 5H), 5.52 – 5.40 (m, 2H), 5.06 (p,  $J = 6.2$  Hz, 1H), 1.29 (d,  $J = 6.3$  Hz, 3H), 1.06 (d,  $J = 6.2$  Hz, 3H).  $^{13}\text{C NMR}$  (62.5 MHz,  $\text{CDCl}_3$ ):  $\delta$  170.26, 144.86 (dm,  $J = 253.9$  Hz), 136.95 (dm,  $J = 240.7$  Hz), 136.76, 129.27 (m), 129.04, 128.85, 126.80, 121.44 (q,  $J = 271.3$  Hz), 97.30 (m), 70.34, 60.72, 21.60, 21.15.  $^{19}\text{F NMR}$  (376 MHz,  $\text{CFCl}_3$ ,  $\text{CDCl}_3$ ): -55.56 (t,  $J = 21.1$  Hz, 3F), -143.46 (m, 2F), -159.13 (m, 2F). IR (neat,  $\text{cm}^{-1}$ ): 3391, 2990, 1733, 1652, 1506, 1330, 1291, 1139, 1099, 957, 878, 710. HRMS (ESI-negative) ( $[\text{M}-\text{H}]^-$ ) Calcd. for:  $\text{C}_{18}\text{H}_{13}\text{F}_7\text{NO}_2$ : 408.0835, Found: 408.0842. HPLC analysis: ee = 97%. Whelk (100% hexane, 1 ml/min):  $t_{major}$  = 8.14 min,  $t_{minor}$  = 8.74 min.

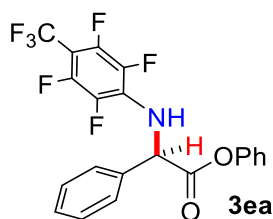

**Phenyl (*R*)-2-phenyl-2-((2,3,5,6-tetrafluoro-4-(trifluoromethyl)phenyl)amino)acetate 3ea** was obtained through the general procedure using 1.5 equiv of azide with  $\alpha,\alpha,\alpha$ -trifluorotoluene as solvent. Yield: 50%.  $[\alpha]_D^{20} = -92^\circ$  ( $c = 0.5$ ,  $\text{CHCl}_3$ ).  $^1\text{H NMR}$  (500 MHz,  $\text{CDCl}_3$ ):  $\delta$  7.52 – 7.40 (m, 5H), 7.37 – 7.33 (m, 2H), 7.24 (t,  $J = 7.5$  Hz, 1H), 6.99 – 6.93 (m, 2H), 5.74 (d,  $J = 8.0$  Hz, 1H), 5.39 (d,  $J = 8.0$  Hz, 1H).  $^{13}\text{C NMR}$  (125 MHz,  $\text{CDCl}_3$ ):  $\delta$  169.63, 150.20, 144.83 (dm,  $J = 240.9$  Hz), 137.03 (dm,  $J = 240.5$  Hz), 135.99, 129.55, 129.44, 129.41, 129.01 (m), 127.11, 126.46, 121.37 (q,  $J = 272.9$  Hz), 120.90, 97.89 (m), 60.88.  $^{19}\text{F NMR}$  (376 MHz,  $\text{CDCl}_3$ ):  $\delta$  -55.12 (t,  $J =$

20.9 Hz, 3F), -142.60 (m, 2F), -158.48 (m, 2F). IR (neat,  $\text{cm}^{-1}$ ): 3394, 2924, 1759, 1656, 1509, 1332, 1236, 1190, 1130, 979, 958, 880, 713, 687. HRMS (ESI-negative) ( $[\text{M}-\text{H}]^-$ ) Calcd. for:  $\text{C}_{21}\text{H}_{11}\text{F}_7\text{NO}_2$ : 442.0678, Found: 442.0683. HPLC analysis: ee = 94%. ADH (99% hexane: 1% isopropanol, 0.7 ml/min):  $t_{\text{major}} = 17.11$  min,  $t_{\text{minor}} = 10.23$  min.

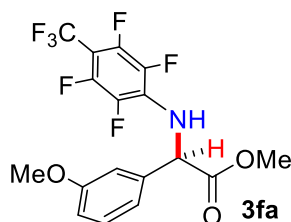

**Methyl (R)-2-(3-methoxyphenyl)-2-((2,3,5,6-tetrafluoro-4-(trifluoromethyl)phenyl)amino)acetate 3fa** was obtained through the general procedure using 1.5 equiv of azide with  $\alpha,\alpha,\alpha$ -trifluorotoluene as solvent. Yield: 61%.  $[\alpha]_D^{20} = -93^\circ$  ( $c = 1.0$ ,  $\text{CHCl}_3$ ).  $^1\text{H}$  NMR (500 MHz,  $\text{CDCl}_3$ ):  $\delta$  7.29 (t,  $J = 7.5$  Hz, 1H), 6.95 (d,  $J = 7.5$  Hz, 1H), 6.89 (m, 2H), 5.45 (m, 2H), 3.81 (s, 3H), 3.77 (s, 3H).  $^{13}\text{C}$  NMR (125 MHz,  $\text{CDCl}_3$ ):  $\delta$  171.18, 160.09, 144.91 (dm,  $J = 250.8$  Hz), 137.93, 136.94 (dm,  $J = 223.4$  Hz), 130.26, 129.04 (m), 121.39 (q,  $J = 272.6$  Hz), 119.09, 114.28, 112.79, 97.62 (m), 60.47 (t,  $J = 4.1$  Hz), 55.30, 53.24.  $^{19}\text{F}$  NMR (376 MHz,  $\text{CFCl}_3$ ,  $\text{CDCl}_3$ ):  $\delta$  -55.60 (t,  $J = 20.7$  Hz, 3F), -143.29 (m, 2F), -158.94 (m, 2F). IR (neat,  $\text{cm}^{-1}$ ): 3390, 2959, 1743, 1657, 1508, 1330, 1235, 1129, 970, 714. HRMS (ESI-negative) ( $[\text{M}-\text{H}]^-$ ) Calcd. for:  $\text{C}_{17}\text{H}_{11}\text{F}_7\text{NO}_3$ : 410.0627, Found: 410.0634. HPLC analysis: ee = 93%. ADH (99% hexane: 1% isopropanol, 1 ml/min):  $t_{\text{major}} = 6.40$  min,  $t_{\text{minor}} = 7.14$  min.

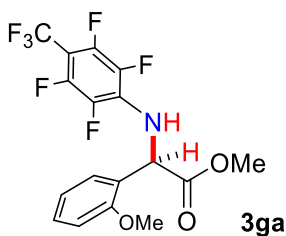

**Methyl (R)-2-(2-methoxyphenyl)-2-((2,3,5,6-tetrafluoro-4-(trifluoromethyl)phenyl)amino)acetate 3ga** was obtained through the general procedure using 1.5 equiv of azide with  $\alpha,\alpha,\alpha$ -trifluorotoluene as solvent. Yield: 52%.  $[\alpha]_D^{20} = -152^\circ$  ( $c = 0.6$ ,  $\text{CHCl}_3$ ).  $^1\text{H}$  NMR (500 MHz,  $\text{CDCl}_3$ ):  $\delta$  7.34 (dt,  $J = 2.0, 7.8$  Hz, 1H), 7.28 (d,  $J = 7.5$  Hz, 1H), 6.97 (dt,  $J = 0.5, 7.5$  Hz, 1H),



6.93 (d,  $J = 8.0$  Hz, 1H), 5.69 (d,  $J = 9.5$  Hz, 1H), 5.46 (d,  $J = 9.0$  Hz, 1H), 3.87 (s, 3H), 3.73 (s, 3H).  $^{13}\text{C}$  NMR (125 MHz,  $\text{CDCl}_3$ ):  $\delta$  171.45, 156.99, 144.80 (dm,  $J = 255.4$  Hz), 137.18 (dm,  $J = 239.1$  Hz), 130.37, 130.02 (m), 129.57, 124.92, 121.48 (q,  $J = 271.4$  Hz), 121.12, 111.38, 97.42 (m), 57.73 (t,  $J = 4.5$  Hz), 55.62, 52.93.  $^{19}\text{F}$  NMR (376 MHz,  $\text{CFCl}_3$ ,  $\text{CDCl}_3$ ):  $\delta$  -55.55 (t,  $J = 20.9$  Hz, 3F), -143.77 (m, 2F), -159.09 (m, 2F). IR (neat,  $\text{cm}^{-1}$ ): 3389, 2956, 2844, 1746, 1655, 1509, 1331, 1236, 1128, 967, 874, 754, 713. HRMS (ESI-negative) ( $[\text{M}-\text{H}]^-$ ) Calcd. for:  $\text{C}_{17}\text{H}_{11}\text{F}_7\text{NO}_3$ : 410.0627, Found: 410.0622. HPLC analysis: ee = 95%. Whelk (99.5% hexane: 0.5% isopropanol, 1 ml/min):  $t_{\text{major}} = 8.27$  min,  $t_{\text{minor}} = 11.14$  min.

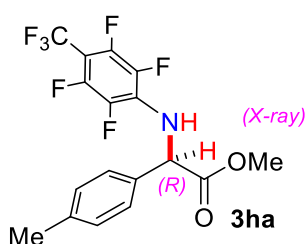

**Methyl (R)-2-((2,3,5,6-tetrafluoro-4-(trifluoromethyl)phenyl)amino)-2-(p-tolyl)acetate 3ha** was obtained through the general procedure using 1.5 equiv of azide with  $\alpha,\alpha,\alpha$ -trifluorotoluene as solvent. Yield: 70%.  $[\alpha]_D^{20} = -88^\circ$  ( $c = 0.5$ ,  $\text{CHCl}_3$ ).  $^1\text{H}$  NMR (400 MHz,  $\text{CDCl}_3$ ):  $\delta$  7.25 (d,  $J = 8.4$  Hz, 2H), 7.17 (d,  $J = 8.0$  Hz, 2H), 5.45 (m, 2H), 3.75 (s, 3H), 2.34 (s, 3H).  $^{13}\text{C}$  NMR (125 MHz,  $\text{CDCl}_3$ ):  $\delta$  171.46, 144.75 (dm,  $J = 258.8$  Hz), 139.06, 136.89 (dm,  $J = 237.8$  Hz), 133.51, 129.88, 129.27 (m), 126.82, 121.42 (q,  $J = 269.8$  Hz), 97.35 (m), 60.29 (t,  $J = 4.0$  Hz), 53.15, 21.13.  $^{19}\text{F}$  NMR (376 MHz,  $\text{CFCl}_3$ ,  $\text{CDCl}_3$ ):  $\delta$  -55.59 (t,  $J = 20.7$  Hz, 3F), -143.39 (m, 2F), -158.97 (m, 2F). IR (neat,  $\text{cm}^{-1}$ ): 3374, 2957, 2924, 1738, 1656, 1505, 1456, 1291, 1176, 1139, 1010, 968, 874, 711, 619. HRMS (ESI-negative) ( $[\text{M}-\text{H}]^-$ ) Calcd. for:  $\text{C}_{17}\text{H}_{11}\text{F}_7\text{NO}_2$ : 394.0678, Found: 394.0692. HPLC analysis: ee = 94%. OJH (99% hexane: 1% isopropanol, 1 ml/min):  $t_{\text{major}} = 8.52$  min,  $t_{\text{minor}} = 5.25$  min.

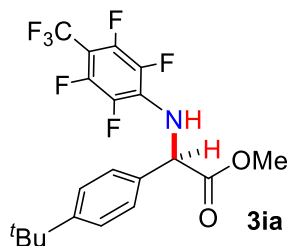

**Methyl (*R*)-2-(4-(*tert*-butyl)phenyl)-2-((2,3,5,6-tetrafluoro-4-(trifluoromethyl)phenyl)amino)acetate **3ia**** was obtained through the general procedure using 1.5 equiv of azide with  $\alpha,\alpha,\alpha$ -trifluorotoluene as solvent. Yield: 57%.  $[\alpha]_D^{20} = -76^\circ$  ( $c = 1.0$ ,  $\text{CHCl}_3$ ).  $^1\text{H NMR}$  (500 MHz,  $\text{CDCl}_3$ ):  $\delta$  7.39 (d,  $J = 8.5$  Hz, 2H), 7.29 (d,  $J = 8.5$  Hz, 2H), 5.49 (d,  $J = 8.0$  Hz, 1H), 5.37 (d,  $J = 8.0$  Hz, 1H), 3.76 (s, 3H), 1.32 (s, 9H).  $^{13}\text{C NMR}$  (125 MHz,  $\text{CDCl}_3$ ):  $\delta$  171.46, 152.16, 144.88 (dm,  $J = 256.2$  Hz), 136.99 (dm,  $J = 239.3$  Hz), 133.36, 129.26 (m), 126.58, 126.19, 121.46 (q,  $J = 271.0$  Hz), 97.22 (m), 60.27 (t,  $J = 4.1$  Hz), 53.09, 34.64, 31.19.  $^{19}\text{F NMR}$  (376 MHz,  $\text{CFCl}_3$ ,  $\text{CDCl}_3$ ):  $\delta$  -55.55 (t,  $J = 21.1$  Hz, 3F), -143.42 (m, 2F), -159.16 (m, 2F). IR (neat,  $\text{cm}^{-1}$ ): 3408, 2974, 1738, 1656, 1546, 1505, 1462, 1328, 1133, 1082, 1008, 962, 875, 712, 667. HRMS (ESI-negative) ( $[\text{M}-\text{H}]^-$ ) Calcd. for:  $\text{C}_{20}\text{H}_{17}\text{F}_7\text{NO}_2$ : 436.1147, Found: 436.1165. HPLC analysis: ee = 88%. Whelk (100% hexane, 0.8 ml/min):  $t_{\text{major}} = 10.65$  min,  $t_{\text{minor}} = 11.36$  min.

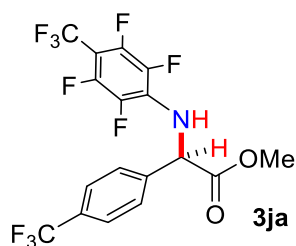

**Methyl (*R*)-2-((2,3,5,6-tetrafluoro-4-(trifluoromethyl)phenyl)amino)-2-(4-(trifluoromethyl)phenyl)acetate **3ja**** was obtained through the general procedure using 1.5 equiv of azide with  $\alpha,\alpha,\alpha$ -trifluorotoluene as solvent. Yield: 41%.  $[\alpha]_D^{20} = -65^\circ$  ( $c = 0.7$ ,  $\text{CHCl}_3$ ).  $^1\text{H NMR}$  (500 MHz,  $\text{CDCl}_3$ ):  $\delta$  7.64 (d,  $J = 8.0$  Hz, 2H), 7.51 (d,  $J = 8.0$  Hz, 2H), 5.67 – 5.49 (m, 2H), 3.79 (s, 3H).  $^{13}\text{C NMR}$  (125 MHz,  $\text{CDCl}_3$ ):  $\delta$  170.55, 144.79 (dm,  $J = 255.0$  Hz), 140.50, 136.85 (tdd,  $J = 4.9, 15.2, 239.4$  Hz), 131.28 (q,  $J = 32.6$  Hz), 128.57 (m), 127.34, 126.19 (q,  $J = 3.8$  Hz), 123.73 (q,  $J = 270.6$  Hz), 121.31 (q,  $J = 273.5$  Hz), 98.05 (m), 60.05, 53.56.  $^{19}\text{F NMR}$  (376 MHz,  $\text{CFCl}_3$ ,  $\text{CDCl}_3$ ):  $\delta$  -55.66 (t,  $J = 20.9$  Hz, 3F), -63.32 (s, 3F), -142.80 (m, 2F), -159.00 (m, 2F). IR (neat,  $\text{cm}^{-1}$ ): 3392, 2963,

1745, 1658, 1509, 1322, 1124, 1067, 968, 876, 713. HRMS (ESI-negative) ( $[M-H]^-$ ) Calcd. for:  $C_{17}H_8F_{10}NO_2$ : 448.0395, Found: 448.0407. HPLC analysis: ee = 92%. ADH (99% hexane: 1% isopropanol, 1 ml/min):  $t_{major} = 5.94$  min,  $t_{minor} = 5.67$  min.

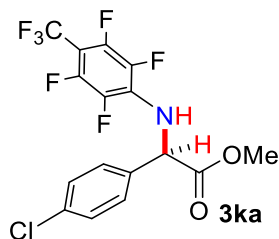

**Methyl (R)-2-(4-chlorophenyl)-2-((2,3,5,6-tetrafluoro-4-(trifluoromethyl)phenyl) amino) acetate 3ka** was obtained through the general procedure using 1.5 equiv of azide with  $\alpha,\alpha,\alpha$ -trifluorotoluene as solvent. Yield: 60%.  $[\alpha]_D^{20} = -125^\circ$  ( $c = 0.8$ ,  $CHCl_3$ ).  $^1H$  NMR (500 MHz,  $CDCl_3$ ):  $\delta$  7.36–7.30 (m, 4H), 5.53 (br, 1H), 5.47 (d,  $J = 8.0$  Hz, 1H), 3.77 (s, 3H).  $^{13}C$  NMR (125 MHz,  $CDCl_3$ ):  $\delta$  170.89, 144.83 (dm,  $J = 254.6$  Hz), 136.90 (dm,  $J = 240.6$  Hz), 135.04, 129.41, 128.68 (m), 128.25, 121.32 (q,  $J = 272.7$  Hz), 97.96 (m), 59.79 (t,  $J = 4.1$  Hz), 53.41.  $^{19}F$  NMR (376 MHz,  $CFCl_3$ ,  $CDCl_3$ ):  $\delta$  -55.64 (t,  $J = 20.7$  Hz, 3F), -143.00 (m, 2F), -158.92 (m, 2F). IR (neat,  $cm^{-1}$ ): 3390, 2959, 1743, 1656, 1509, 1332, 1131, 968, 876, 770, 712. HRMS (ESI-negative) ( $[M-H]^-$ ) Calcd. for:  $C_{16}H_8ClF_7NO_2$ : 414.0132, Found: 414.0145. HPLC analysis: ee = 93%. OJH (99% hexane: 1% isopropanol, 1 ml/min):  $t_{major} = 12.07$  min,  $t_{minor} = 7.60$  min.

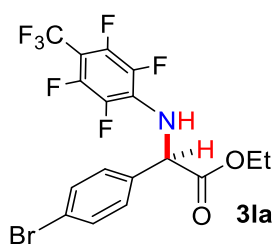

**Ethyl (R)-2-(4-bromophenyl)-2-((2,3,5,6-tetrafluoro-4-(trifluoromethyl)phenyl)amino)acetate 3la** was obtained through the general procedure using 1.5 equiv of azide with  $\alpha,\alpha,\alpha$ -trifluorotoluene as solvent. Yield: 67%.  $[\alpha]_D^{20} = -178^\circ$  ( $c = 0.5$ ,  $CHCl_3$ ).  $^1H$  NMR (600 MHz,  $CDCl_3$ ):  $\delta$  7.50 (d,  $J = 8.0$  Hz, 2H), 7.25 (d,  $J = 8.0$  Hz, 2H), 5.53 (br, 1H), 5.42 (d,  $J = 8.0$  Hz, 1H), 4.22 (m, 2H), 1.22 (t,  $J = 7.0$  Hz, 3H).  $^{13}C$  NMR (125 MHz,  $CDCl_3$ ):  $\delta$  170.30, 144.80 (dm,  $J = 243.9$  Hz), 136.77 (dm,  $J = 248.0$  Hz), 132.31, 128.80 (m), 128.51, 123.11, 121.33 (q,  $J =$

265.1 Hz), 97.82 (m), 62.72, 59.98 (t,  $J = 4.0$  Hz), 13.92.  $^{19}\text{F}$  NMR (376 MHz,  $\text{CFCl}_3$ ,  $\text{CDCl}_3$ ):  $\delta$  -55.62 (t,  $J = 21.1$  Hz, 3F), -143.05 (m, 2F), -158.99 (m, 2F). IR (neat,  $\text{cm}^{-1}$ ): 3391, 2990, 1733, 1652, 1506, 1456, 1330, 1291, 1139, 1099, 957, 878, 710, 630. HRMS (ESI-negative) ( $[\text{M}-\text{H}]^-$ ) Calcd. for:  $\text{C}_{17}\text{H}_{10}\text{BrF}_7\text{NO}_2$ : 471.9783, Found: 471.9796. HPLC analysis: ee = 92%. Whelk (99.5% hexane: 0.5% isopropanol, 1 ml/min):  $t_{\text{major}} = 6.48$  min,  $t_{\text{minor}} = 6.99$  min.

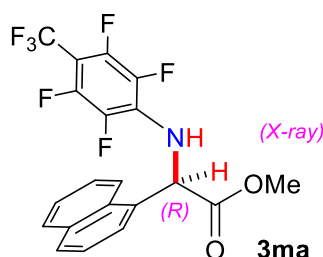

**Methyl (R)-2-(naphthalen-1-yl)-2-((2,3,5,6-tetrafluoro-4-(trifluoromethyl)phenyl)amino)acetate 3ma** was obtained through the general procedure using 1.5 equiv of azide with  $\alpha,\alpha,\alpha$ -trifluorotoluene as solvent. Yield: 68%.  $[\alpha]_D^{20} = -68^\circ$  ( $c = 1.0$ ,  $\text{CHCl}_3$ ).  $^1\text{H}$  NMR (500 MHz,  $\text{CDCl}_3$ ):  $\delta$  8.20 (d,  $J = 8.5$  Hz, 1H), 7.92 (d,  $J = 8.0$  Hz, 1H), 7.90 – 7.88 (m, 1H), 7.63 – 7.56 (m, 2H), 7.48 (m, 2H), 6.31 (d,  $J = 8.0$  Hz, 1H), 5.36 (br, 1H), 3.75 (s, 3H).  $^{13}\text{C}$  NMR (125 MHz,  $\text{CDCl}_3$ ):  $\delta$  171.75, 144.82 (dm,  $J = 255.1$  Hz), 136.94 (dm,  $J = 241.0$  Hz), 134.19, 132.20, 130.84, 129.98, 129.28 (m), 129.12, 127.20, 126.30, 125.33, 125.15, 122.82, 121.43 (q,  $J = 272.5$  Hz), 97.46 (m), 57.56, 53.19.  $^{19}\text{F}$  NMR (376 MHz,  $\text{CFCl}_3$ ,  $\text{CDCl}_3$ ):  $\delta$  -55.61 (t,  $J = 20.7$  Hz, 3F), -143.22 (m, 2F), -159.29 (m, 2F). IR (neat,  $\text{cm}^{-1}$ ): 3396, 2967, 1748, 1660, 1510, 1331, 1285, 1121, 998, 961, 792, 775, 714. HRMS (ESI-negative) ( $[\text{M}-\text{H}]^-$ ) Calcd. for:  $\text{C}_{20}\text{H}_{11}\text{F}_7\text{NO}_2$ : 430.0678, Found: 430.0687. HPLC analysis: ee = 88%. Whelk (99.5% hexane: 0.5% isopropanol, 1 ml/min):  $t_{\text{major}} = 8.91$  min,  $t_{\text{minor}} = 10.80$  min.

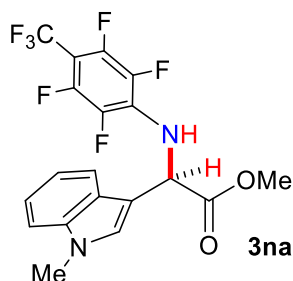

**Methyl (R)-2-(1-methyl-1H-indol-2-yl)-2-((2,3,5,6-tetrafluoro-4-(trifluoromethyl)phenyl)amino)acetate 3na** was obtained through the general procedure using 1.5 equiv of azide with  $\alpha,\alpha,\alpha$ -trifluorotoluene as solvent. Yield: 90%.  $[\alpha]_D^{20} = -53^\circ$  ( $c = 1.0$ ,  $\text{CHCl}_3$ ).  $^1\text{H NMR}$  (500 MHz,  $\text{CDCl}_3$ ):  $\delta$  7.70 (d,  $J = 8.0$  Hz, 1H), 7.34 (d,  $J = 8.0$  Hz, 1H), 7.29 (t,  $J = 7.5$  Hz, 1H), 7.19 (t,  $J = 7.5$  Hz, 1H), 7.15 (s, 1H), 5.80 (d,  $J = 8.0$  Hz, 1H), 5.35 (br, 1H), 3.79 (s, 3H), 3.76 (s, 3H).  $^{13}\text{C NMR}$  (125 MHz,  $\text{CDCl}_3$ ):  $\delta$  171.74, 144.76 (dm,  $J = 244.3$  Hz), 137.02 (dm,  $J = 240.6$  Hz), 137.19, 129.60 (m), 128.28, 125.36, 122.48, 121.45 (q,  $J = 271.0$  Hz), 120.25, 118.87, 109.78, 109.43, 97.01 (m), 54.25 (t,  $J = 4.5$  Hz), 53.00, 32.95.  $^{19}\text{F NMR}$  (376 MHz,  $\text{CFCl}_3$ ,  $\text{CDCl}_3$ ):  $\delta$  -55.06 (t,  $J = 21.1$  Hz, 3F), -143.12 (m, 2F), -158.69 (m, 2F). IR (neat,  $\text{cm}^{-1}$ ): 3367, 2954, 1732, 1655, 1508, 1330, 1237, 1125, 943, 876, 742, 713. HRMS (ESI-negative) ( $[\text{M}-\text{H}]^-$ ) Calcd. for:  $\text{C}_{19}\text{H}_{12}\text{F}_7\text{N}_2\text{O}_2$ : 433.0787, Found: 433.0792. HPLC analysis: ee = 93%. ADH (99% hexane: 1% isopropanol, 1 ml/min):  $t_{\text{major}} = 9.05$  min,  $t_{\text{minor}} = 15.23$  min.

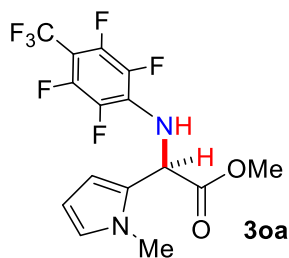

**Methyl (R)-2-(1-methyl-1H-pyrrol-2-yl)-2-((2,3,5,6-tetrafluoro-4-(trifluoromethyl)phenyl)amino)acetate 3oa** was obtained through the general procedure using 1.5 equiv of azide with  $\alpha,\alpha,\alpha$ -trifluorotoluene as solvent. Yield: 75%.  $[\alpha]_D^{20} = -106^\circ$  ( $c = 0.5$ ,  $\text{CHCl}_3$ ).  $^1\text{H NMR}$  (500 MHz,  $\text{CDCl}_3$ ):  $\delta$  6.65 (t,  $J = 2.0$  Hz, 1H), 6.08 (m, 2H), 5.59 (d,  $J = 9.0$  Hz, 1H), 4.97 (m, 1H), 3.79 (s, 3H), 3.71 (s, 3H).  $^{13}\text{C NMR}$  (125 MHz,  $\text{CDCl}_3$ ):  $\delta$  170.55, 144.87 (dm,  $J = 254.3$  Hz), 137.19 (dm,  $J = 240.5$  Hz), 129.30 (m), 126.63, 124.30, 121.38 (q,  $J = 271.9$  Hz), 108.14, 107.53, 98.04 (m),

53.72 (t,  $J = 4.8$  Hz), 53.13, 33.92.  $^{19}\text{F}$  NMR (376 MHz,  $\text{CFCl}_3$ ,  $\text{CDCl}_3$ ):  $\delta$  -55.63 (t,  $J = 20.7$  Hz, 3F), -143.12 (m, 2F), -158.84 (m, 2F). IR (neat,  $\text{cm}^{-1}$ ): 3389, 2958, 1746, 1655, 1509, 1332, 1232, 1129, 1080, 965, 876, 713. HRMS (ESI-negative) ( $[\text{M}-\text{H}]^-$ ) Calcd. for:  $\text{C}_{15}\text{H}_{10}\text{F}_7\text{N}_2\text{O}_2$ : 383.0630, Found: 383.0637. HPLC analysis: ee = 98%. ADH (99% hexanes: 1% isopropanol, 1 ml/min):  $t_{\text{major}} = 5.91$  min,  $t_{\text{minor}} = 6.54$  min.

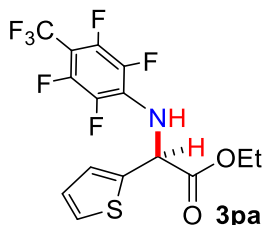

**Methyl (S)-2-((2,3,5,6-tetrafluoro-4-(trifluoromethyl)phenyl)amino)-2-(thiophen-2-yl)acetate 3pa** was obtained through the general procedure using 1.5 equiv of azide with  $\text{PhCF}_3$  as solvent. Yield: 88%.  $[\alpha]_D^{20} = -120^\circ$  ( $c = 0.2$ ,  $\text{CHCl}_3$ ).  $^1\text{H}$  NMR (500 MHz,  $\text{CDCl}_3$ ):  $\delta$  7.30 (dd,  $J = 1.0, 5.0$  Hz, 1H), 7.10 (d,  $J = 3.5$  Hz, 1H), 6.98 (dd,  $J = 3.5, 5.0$  Hz, 1H), 5.74 (d,  $J = 8.5$  Hz, 1H), 5.38 (d,  $J = 8.0$  Hz, 1H), 4.28 (m, 2H), 1.28 (t,  $J = 7.5$  Hz, 3H).  $^{13}\text{C}$  NMR (125 MHz,  $\text{CDCl}_3$ ):  $\delta$  169.85, 144.86 (dm,  $J = 254.1$  Hz), 139.18, 137.18 (dm,  $J = 240.9$  Hz), 128.91 (m), 127.24, 126.46, 126.38, 121.38 (q,  $J = 272.1$  Hz), 97.98 (m), 62.78, 56.44 (t,  $J = 4.6$  Hz), 13.97.  $^{19}\text{F}$  NMR (376 MHz,  $\text{CFCl}_3$ ,  $\text{CDCl}_3$ ):  $\delta$  -55.16 (t,  $J = 21.1$  Hz, 3F), -142.63 (m, 2F), -157.89 (m, 2F). IR (neat,  $\text{cm}^{-1}$ ): 3384, 2984, 1740, 1655, 1508, 1334, 1231, 1132, 978, 713. HRMS (ESI-negative) ( $[\text{M}-\text{H}]^-$ ) Calcd. for:  $\text{C}_{15}\text{H}_9\text{F}_7\text{NO}_2\text{S}$ : 400.0242, Found: 400.0252. HPLC analysis: ee = 91%. ODH (99% hexane: 1% isopropanol, 0.7 ml/min):  $t_{\text{major}} = 8.04$  min,  $t_{\text{minor}} = 11.78$  min.

### 5.3. Enantioselective C–H Amination of Various Arylcrotonate Esters with 2a

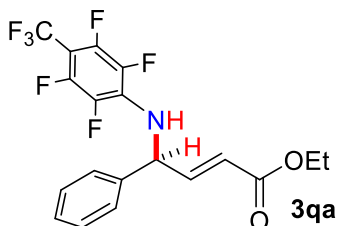

**Ethyl (*S,E*)-4-phenyl-4-((2,3,5,6-tetrafluoro-4-(trifluoromethyl)phenyl)amino)but-2-enoate 3qa** was obtained through the general procedure using 1.5 equiv of azide with benzene as solvent. Yield: 64%.  $[\alpha]_D^{20} = -55^\circ$  ( $c = 1.0$ ,  $\text{CHCl}_3$ ).  $^1\text{H NMR}$  (600 MHz,  $\text{CDCl}_3$ )  $\delta$  7.41 – 7.39 (m, 2H), 7.36 (m, 1H), 7.31–7.29 (m, 2H), 7.10 (dd,  $J = 15.6, 5.6$  Hz, 1H), 5.99 (dd,  $J = 15.7, 1.5$  Hz, 1H), 5.60 (dd,  $J = 8.4, 5.9$  Hz, 1H), 4.49 (d,  $J = 8.6$  Hz, 1H), 4.20 (qd,  $J = 7.2, 1.3$  Hz, 2H), 1.29 (t,  $J = 7.1$  Hz, 3H).  $^{13}\text{C NMR}$  (150 MHz,  $\text{CDCl}_3$ )  $\delta$  165.64, 146.03, 144.66 (dm,  $J = 264.9$  Hz), 138.64, 136.48 (dm,  $J = 241.3$  Hz), 129.38 (m), 129.29, 128.78, 126.89, 122.60, 121.30 (q,  $J = 272.9$  Hz), 97.65 (m), 60.77, 59.42 (t,  $J = 4.6$  Hz), 14.08.  $^{19}\text{F NMR}$  (470 MHz,  $\text{CDCl}_3$ )  $\delta$  -55.10 (t,  $J = 20.8$  Hz, 3F), -142.46 (m, 2F), -158.06 (m, 2F). IR (neat,  $\text{cm}^{-1}$ ): 3339, 2986, 1715, 1657, 1512, 1334, 1234, 1134, 974, 713. HRMS (DART) ( $[\text{M}+\text{H}]^+$ ) Calcd. for:  $\text{C}_{19}\text{H}_{15}\text{F}_7\text{NO}_2$ : 422.09855, Found: 422.09960. HPLC analysis: ee = 94%. ODH (95% hexane: 5% isopropanol, 0.8 ml/min):  $t_{\text{major}} = 13.13$  min,  $t_{\text{minor}} = 17.29$  min.

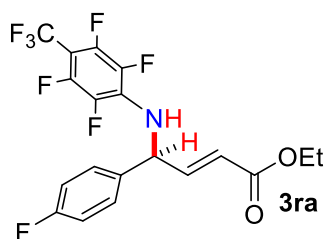

**Ethyl (*S,E*)-4-(4-fluorophenyl)-4-((2,3,5,6-tetrafluoro-4-(trifluoromethyl)phenyl)amino)but-2-enoate 3ra** was obtained through the general procedure using 1.5 equiv of azide with benzene as solvent. Yield: 53%.  $[\alpha]_D^{20} = -69^\circ$  ( $c = 1.0$ ,  $\text{CHCl}_3$ ).  $^1\text{H NMR}$  (600 MHz,  $\text{CDCl}_3$ )  $\delta$  7.28 – 7.30 (m, 2H), 7.12 – 7.05 (m, 3H), 5.98 (dd,  $J = 15.8, 1.4$  Hz, 1H), 5.60 (m, 1H), 4.45 (d,  $J = 8.7$  Hz, 1H), 4.21 (qd,  $J = 7.3, 1.2$  Hz, 2H), 1.30 (t,  $J = 7.1$  Hz, 3H).  $^{13}\text{C NMR}$  (150 MHz,  $\text{CDCl}_3$ )  $\delta$  165.53, 162.69 (d,  $J = 248.5$  Hz), 145.65, 144.81 (dm,  $J = 255.2$  Hz), 136.79 (dm,  $J = 241.4$  Hz), 134.49

(d,  $J = 3.4$  Hz), 129.20 (m), 128.75, 128.69, 122.90, 121.25 (q,  $J = 272.6$  Hz), 116.35, 116.20, 97.90 (m), 60.85, 58.72 (t,  $J = 4.6$  Hz), 14.07.  $^{19}\text{F}$  NMR (564 MHz,  $\text{CDCl}_3$ )  $\delta$  -55.12 (t,  $J = 20.9$  Hz, 3F), -112.42 (m, 1F), -142.28 (m, 2F), -157.92 (m, 2F). IR (neat,  $\text{cm}^{-1}$ ): 3339, 2987, 1715, 1657, 1510, 1335, 1232, 1135, 975, 714. HRMS (DART) ( $[\text{M}+\text{H}]^+$ ) Calcd. for:  $\text{C}_{19}\text{H}_{14}\text{F}_8\text{NO}_2$ : 440.08913, Found: 440.08805. HPLC analysis: ee = 97%. ODH (95% hexane: 5% isopropanol, 0.8 ml/min):  $t_{\text{major}} = 12.78$  min,  $t_{\text{minor}} = 16.42$  min.

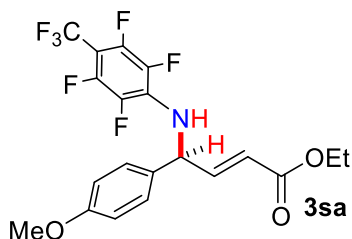

**Ethyl (S,E)-4-(4-methoxyphenyl)-4-((2,3,5,6-tetrafluoro-4-(trifluoromethyl)phenyl)amino)but-2-enoate 3sa** was obtained through the general procedure using 1.5 equiv of azide with benzene as solvent. Yield: 70%.  $[\alpha]_D^{20} = -75^\circ$  ( $c = 1.0$ ,  $\text{CHCl}_3$ ).  $^1\text{H}$  NMR (500 MHz,  $\text{CDCl}_3$ )  $\delta$  7.22 (d,  $J = 8.4$  Hz, 2H), 7.10 (dd,  $J = 15.6, 5.5$  Hz, 1H), 6.92 (d,  $J = 8.4$  Hz, 2H), 5.98 (dd,  $J = 15.6, 1$  Hz), 5.56 (m, 1H), 4.43 (br, 1H), 4.21 (q,  $J = 7.1$  Hz, 2H), 3.81 (s, 3H), 1.29 (t,  $J = 7.0$  Hz, 3H).  $^{13}\text{C}$  NMR (125 MHz,  $\text{CDCl}_3$ )  $\delta$  165.82, 159.06, 146.40, 145.10 (dm,  $J = 252.1$  Hz), 136.59 (dm,  $J = 245.95$  Hz), 135.62, 129.59 (m), 126.74, 126.32, 121.40 (q,  $J = 272.6$  Hz), 114.68, 97.90, 60.80, 58.95 (q,  $J = 4.7$  Hz), 55.33, 14.16.  $^{19}\text{F}$  NMR (470 MHz,  $\text{CDCl}_3$ )  $\delta$  -55.08 (t,  $J = 20.8$  Hz, 3F), -142.58 (m, 2F), -158.12 (m, 2F). IR (neat,  $\text{cm}^{-1}$ ): 3341, 1716, 1656, 1511, 1334, 1234, 1177, 1134, 974, 713. HRMS (DART) ( $[\text{M}+\text{H}]^+$ ) Calcd. for:  $\text{C}_{20}\text{H}_{17}\text{F}_7\text{NO}_3$ : 452.10912, Found: 452.11023. HPLC analysis: ee = 95%. ODH (95% hexane: 5% isopropanol, 0.8 ml/min):  $t_{\text{major}} = 16.13$  min,  $t_{\text{minor}} = 18.83$  min.

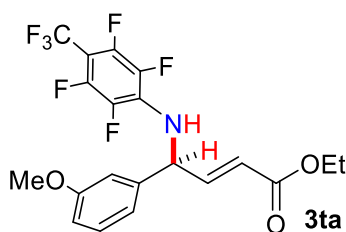

**Ethyl (S,E)-4-(3-methoxyphenyl)-4-((2,3,5,6-tetrafluoro-4-trifluoromethyl)phenyl) amino)but-2-enoate 3ta** was obtained through the general procedure using 1.5 equiv of azide with



benzene as solvent. Yield: 63%.  $[\alpha]_D^{20} = -83^\circ$  ( $c = 1.0$ ,  $\text{CHCl}_3$ ).  $^1\text{H NMR}$  (600 MHz,  $\text{CDCl}_3$ )  $\delta$  7.32 (t,  $J = 8.0$  Hz, 1H), 7.09 (dd,  $J = 15.6, 5.6$  Hz, 1H), 6.89 (d,  $J = 8.1$  Hz, 2H), 6.83 (s, 1H), 6.00 (d,  $J = 15.8$  Hz, 1H), 5.57 (dd,  $J = 5.4, 9.0$  Hz, 1H), 4.50 (d,  $J = 9.1$  Hz, 1H), 4.21 (q,  $J = 7.0$  Hz, 2H), 3.82 (s, 3H), 1.29 (t,  $J = 7.1$  Hz, 3H).  $^{13}\text{C NMR}$  (150 MHz,  $\text{CDCl}_3$ )  $\delta$  165.72, 160.25, 146.03, 144.92 (dm,  $J = 257.9$  Hz), 140.27, 136.84 (dm,  $J = 241.5$ ), 130.51, 122.64, 121.39 (q,  $J = 272.5$  Hz), 119.01, 113.82, 112.99, 97.67 (m), 60.85, 59.47, 55.24, 14.14.  $^{19}\text{F NMR}$  (564 MHz,  $\text{CDCl}_3$ )  $\delta$  -55.12 (t,  $J = 20.8$  Hz, 3F), -142.51 (m, 2F), -158.06 (m, 2F). IR (neat,  $\text{cm}^{-1}$ ): 3342, 2940, 1715, 1657, 1512, 1334, 1234, 1134, 713. HRMS (DART) ( $[\text{M}+\text{H}]^+$ ) Calcd. for:  $\text{C}_{20}\text{H}_{17}\text{F}_7\text{NO}_3$ : 452.10912, Found: 452.10866. HPLC analysis: ee = 95%. ODH (95% hexane: 5% isopropanol, 0.8 ml/min):  $t_{\text{major}} = 16.19$  min,  $t_{\text{minor}} = 20.91$  min.

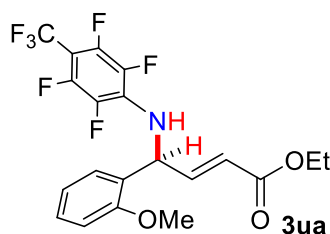

**Ethyl (S,E)-4-(2-methoxyphenyl)-4-((2,3,5,6-tetrafluoro-4-(trifluoromethyl)phenyl)amino)but-2-enoate 3ua** was obtained through the general procedure using 1.5 equiv of azide with benzene as solvent. Yield: 70%.  $[\alpha]_D^{20} = -97^\circ$  ( $c = 1.0$ ,  $\text{CHCl}_3$ ).  $^1\text{H NMR}$  (600 MHz,  $\text{CDCl}_3$ )  $\delta$  7.33 (m, 1H), 7.19 (d,  $J = 7.5$  Hz, 1H), 7.15 (dd,  $J = 15.7, 5.5$  Hz, 1H), 7.01 – 6.90 (m, 2H), 5.97 (d,  $J = 16.1$  Hz, 1H), 5.71 (dd,  $J = 9.5, 5.4$  Hz, 1H), 5.29 (d,  $J = 9.1$  Hz, 1H), 4.19 (q,  $J = 7.1$  Hz, 2H), 3.87 (s, 3H), 1.28 (t,  $J = 7.2$  Hz, 3H).  $^{13}\text{C NMR}$  (150 MHz,  $\text{CDCl}_3$ )  $\delta$  166.14, 156.96, 146.38, 144.59 (dm,  $J = 247.0$  Hz), 137.08 (dm,  $J = 241.1$  Hz), 130.18 (m), 130.08, 128.80, 126.54, 121.85, 121.51 (q,  $J = 272.4$  Hz), 121.25, 111.48, 97.10 (m), 60.70, 57.68 (t,  $J = 5.1$  Hz), 55.50, 14.21.  $^{19}\text{F NMR}$  (564 MHz,  $\text{CDCl}_3$ )  $\delta$  -55.06 (t,  $J = 20.8$  Hz, 3F), -143.07 (m, 2F), -158.58 (m, 2F). IR (neat,  $\text{cm}^{-1}$ ): 3369, 2982, 1718, 1656, 1512, 1332, 1234, 1132, 876, 713. HRMS (DART) ( $[\text{M}+\text{H}]^+$ ) Calcd. for:  $\text{C}_{20}\text{H}_{17}\text{F}_7\text{NO}_3$ : 452.10912, Found: 452.10854. HPLC analysis: ee = 95%. ODH (95% hexane: 5% isopropanol, 0.8 ml/min):  $t_{\text{major}} = 11.60$  min,  $t_{\text{minor}} = 12.89$  min.

#### 5.4. Enantioselective C–H Amination of Various Aryltetrolate Esters with 2a

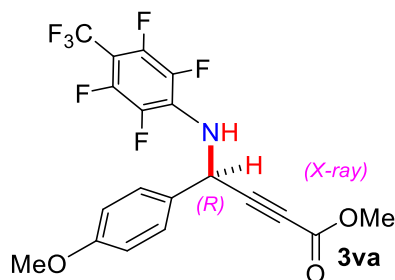

**Methyl (R)-4-(4-methoxyphenyl)-4-((2,3,5,6-tetrafluoro-4-(trifluoromethyl)phenyl)amino)but-2-ynoate 3va** was obtained through the general procedure using 1.2 equiv of azide with benzene as solvent. Yield: 83%.  $[\alpha]_D^{20} = 35^\circ$  ( $c = 1.0$ ,  $\text{CHCl}_3$ ).  $^1\text{H NMR}$  (600 MHz,  $\text{CDCl}_3$ )  $\delta$  7.46 (d,  $J = 8.8$  Hz, 2H), 6.95 (d,  $J = 8.7$  Hz, 2H), 5.79 (d,  $J = 9.2$  Hz, 1H), 4.43 (d,  $J = 9.2$  Hz, 1H), 3.83 (s, 3H), 3.79 (s, 3H).  $^{13}\text{C NMR}$  (150 MHz,  $\text{CDCl}_3$ )  $\delta$  163.02, 156.01, 147.47 (dm,  $J = 241.2$  Hz), 140.04 (dm,  $J = 239.0$  Hz), 131.42 (m), 131.16, 130.84, 123.95 (q,  $J = 271.4$  Hz), 117.26, 101.53 (m), 87.02, 80.20, 58.08, 55.51, 53.03, 32.34.  $^{19}\text{F NMR}$  (564 MHz,  $\text{CDCl}_3$ )  $\delta$  -55.23 (t,  $J = 21.3$  Hz, 3F), -142.12 (m, 2F), -156.66 (m, 2F). IR (neat,  $\text{cm}^{-1}$ ): 3344, 2957, 2845, 2240, 1721, 1595, 1512, 1336, 1229, 1033, 990, 715. HRMS (DART) ( $[\text{M}+\text{H}]^+$ ) Calcd. for:  $\text{C}_{19}\text{H}_{13}\text{F}_7\text{NO}_3$ : 436.07782, Found: 436.07846. HPLC analysis: ee = 93%. ASH (90% hexanes: 10% isopropanol, 0.8 ml/min):  $t_{\text{major}} = 11.99$  min,  $t_{\text{minor}} = 14.42$  min.

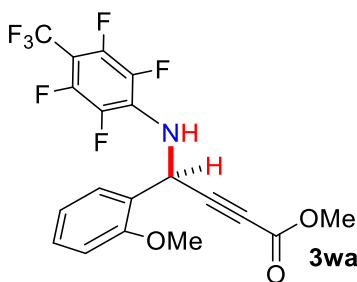

**Methyl (S)-4-(2-methoxyphenyl)-4-((2,3,5,6-tetrafluoro-4-(trifluoromethyl)phenyl)amino)but-2-ynoate 3wa** was obtained through the general procedure using 1.2 equiv of azide with benzene as solvent. Yield: 89%.  $[\alpha]_D^{20} = 9^\circ$  ( $c = 1.0$ ,  $\text{CHCl}_3$ ).  $^1\text{H NMR}$  (600 MHz,  $\text{CDCl}_3$ )  $\delta$  7.41

(d,  $J = 7.5$  Hz, 1H), 7.37 (t,  $J = 7.8$  Hz, 1H), 6.99 (t,  $J = 7.5$  Hz, 1H), 6.95 (d,  $J = 8.2$  Hz, 2H), 5.98 (d,  $J = 9.6$  Hz, 1H), 5.03 (d,  $J = 10.2$  Hz, 1H), 3.90 (s, 3H), 3.76 (s, 3H).  $^{13}\text{C}$  NMR (150 MHz,  $\text{CDCl}_3$ )  $\delta$  156.92, 153.58, 144.78 (dm,  $J = 256.5$  Hz), 137.42 (dm,  $J = 242.0$  Hz), 130.81, 129.16 (m), 128.70, 124.48, 121.37 (q,  $J = 273.4$  Hz), 121.08, 111.52, 98.45 (m), 84.89, 76.08, 55.67, 52.78, 47.47.  $^{19}\text{F}$  NMR (564 MHz,  $\text{CDCl}_3$ )  $\delta$  -55.18 (t,  $J = 21.0$  Hz, 3F), -142.60 (m, 2F), -157.45 (m, 2F). IR (neat,  $\text{cm}^{-1}$ ): 2935, 2237, 1729, 1599, 1495, 1337, 1142, 992, 876, 716. HRMS (DART) ( $[\text{M}+\text{H}]^+$ ) Calcd. for:  $\text{C}_{19}\text{H}_{13}\text{F}_7\text{NO}_3$ : 436.07782, Found: 436.07780. HPLC analysis: ee = 90%. OJH (90% hexane: 10% isopropanol, 0.8 ml/min):  $t_{\text{major}} = 18.90$  min,  $t_{\text{minor}} = 16.36$  min.

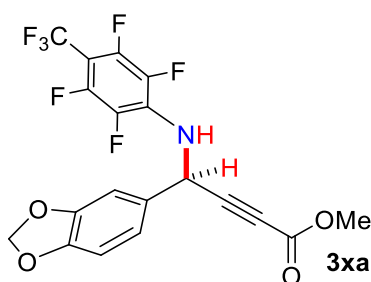

**Methyl (R)-4-(benzo[d][1,3]dioxol-5-yl)-4-((2,3,5,6-tetrafluoro-4-(trifluoromethyl)phenyl)amino) but-2-ynoate 3xa** was obtained through the general procedure using 1.2 equiv of azide with benzene as solvent. Yield: 81%.  $[\alpha]_{\text{D}}^{20} = 17^\circ$  ( $c = 1.0$ ,  $\text{CHCl}_3$ ).  $^1\text{H}$  NMR (600 MHz,  $\text{CDCl}_3$ )  $\delta$  7.02 (d,  $J = 8.1$  Hz, 1H), 7.00 (s, 1H), 6.83 (d,  $J = 7.9$  Hz, 1H), 6.01 (s, 2H), 5.74 (d,  $J = 9.3$  Hz, 1H), 4.45 (d,  $J = 9.3$  Hz, 1H), 3.79 (s, 3H).  $^{13}\text{C}$  NMR (150 MHz,  $\text{CDCl}_3$ )  $\delta$  153.29, 148.56, 148.48, 144.80 (dm,  $J = 261.4$  Hz), 137.51 (dm,  $J = 242.3$  Hz), 129.90, 128.63 (m), 121.28 (q,  $J = 273.3$  Hz), 121.01, 108.71, 107.50, 101.64, 99.08 (m), 84.05, 77.63, 52.99, 50.64.  $^{19}\text{F}$  NMR (564 MHz,  $\text{CDCl}_3$ )  $\delta$  -55.25 (t,  $J = 20.9$  Hz, 3F), -142.02 (m, 2F), -156.60 (m, 2F). IR (neat,  $\text{cm}^{-1}$ ): 2917, 2240, 1724, 1596, 1495, 1335, 1221, 1140, 991, 715. HRMS (DART) ( $[\text{M}+\text{H}]^+$ ) Calcd. for:  $\text{C}_{19}\text{H}_{11}\text{F}_7\text{NO}_4$ : 450.05708, Found: 450.05914. HPLC analysis: ee = 94%. ASH (90% hexane: 10% isopropanol, 0.8 ml/min):  $t_{\text{major}} = 16.53$  min,  $t_{\text{minor}} = 13.61$  min.

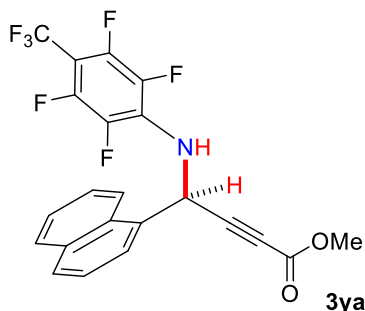

**Methyl (*S*)-4-(naphthalen-1-yl)-4-((2,3,5,6-tetrafluoro-4-(trifluoromethyl)phenyl)amino)but-2-ynoate **3ya**** was obtained through the general procedure using 1.2 equiv of azide with benzene as solvent. Yield: 90%.  $[\alpha]_D^{20} = 10^\circ$  ( $c = 1.0$ ,  $\text{CHCl}_3$ ).  $^1\text{H NMR}$  (600 MHz,  $\text{CDCl}_3$ )  $\delta$  8.10 (d,  $J = 8.4$  Hz, 1H), 8.01 – 7.86 (m, 3H), 7.67 – 7.50 (m, 3H), 6.58 (d,  $J = 9.4$  Hz, 1H), 4.50 (d,  $J = 8.4$  Hz, 1H), 3.80 (s, 3H).  $^{13}\text{C NMR}$  (150 MHz,  $\text{CDCl}_3$ )  $\delta$  155.98, 147.53 (dm,  $J = 262.3$  Hz), 140.26 (dm,  $J = 258.0$  Hz), 136.79, 133.68, 133.32, 132.89, 131.84, 131.47 (m), 130.04, 129.14, 128.65, 127.95, 125.31, 123.96 (q,  $J = 273.3$  Hz), 101.82 (m), 86.65, 81.01, 55.65, 51.21.  $^{19}\text{F NMR}$  (564 MHz,  $\text{CDCl}_3$ )  $\delta$  -55.22 (t,  $J = 20.9$  Hz, 3F), -141.89 (m, 2F), -156.81 (m, 2F). IR (neat,  $\text{cm}^{-1}$ ): 3344, 2957, 2240, 1719, 1659, 1511, 1335, 1230, 778, 714. HRMS (DART) ( $[\text{M}+\text{H}]^+$ ) Calcd. for:  $\text{C}_{16}\text{H}_9\text{F}_7\text{SNO}_2$ : 456.08290, Found: 456.08188. HPLC analysis: ee = 59%. ASH (95% hexane: 5% isopropanol, 0.8 ml/min):  $t_{\text{major}} = 9.96$  min,  $t_{\text{minor}} = 7.30$  min.

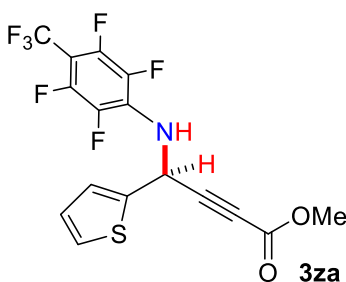

**Methyl (*S*)-4-((2,3,5,6-tetrafluoro-4-(trifluoromethyl)phenyl)amino)-4-(thiophen-2-yl)but-2-ynoate **3za**** was obtained through the general procedure using 1.2 equiv of azide with benzene as solvent. Yield: 80%.  $[\alpha]_D^{20} = 57^\circ$  ( $c = 1.0$ ,  $\text{CHCl}_3$ ).  $^1\text{H NMR}$  (500 MHz,  $\text{CDCl}_3$ )  $\delta$  7.38 (dd,  $J = 5.1$ , 1.2 Hz, 1H), 7.28 (dd,  $J = 3.6$ , 1.2 Hz, 1H), 7.03 (dd,  $J = 5.1$ , 3.6 Hz, 1H), 6.06 (d,  $J = 9.7$  Hz, 1H), 4.58 (d,  $J = 9.7$  Hz, 2H), 3.80 (s, 2H).  $^{13}\text{C NMR}$  (125 MHz,  $\text{CDCl}_3$ )  $\delta$  153.15, 144.85 (dm,  $J = 257.8$  Hz), 138.97, 137.60 (dm,  $J = 242.3$  Hz), 128.22 (m), 127.23, 127.18, 127.14, 121.24 (q,  $J =$

273.3 Hz), 99.66 (m), 83.17, 76.92, 53.05, 46.66.  $^{19}\text{F}$  NMR (470 MHz,  $\text{CDCl}_3$ )  $\delta$  -55.37 (t,  $J$  = 21.0 Hz, 3F), -141.82 (m, 2F), -156.20 (m, 2F). IR (neat,  $\text{cm}^{-1}$ ): 3337, 2958, 2246, 1720, 1511, 1336, 1231, 971, 714. HRMS (DART) ( $[\text{M}+\text{H}]^+$ ) Calcd. for:  $\text{C}_{16}\text{H}_9\text{F}_7\text{SNO}_2$ : 412.02367, Found: 412.02432. HPLC analysis: ee = 99%. ODH (95% hexane: 5% isopropanol, 0.8 ml/min):  $t_{\text{major}}$  = 15.90 min,  $t_{\text{minor}}$  = 18.87 min.

## 6. Characterization of $\alpha$ -Co(III)-Aminyl Radicals by EPR and HRMS

### 6.1. Procedure for EPR Experiment

Catalyst [Co(Por)] (0.001 mmol) was placed into an oven-dried EPR tube. This EPR tube was then capped with a rubber septum and was fasten with Parafilm. The tube was evacuated and backfilled with nitrogen for three times. Then azide **2** (0.05 mmol) in 0.5 mL benzene was added into this tube through gas-tight syringe. The cap of EPR tube was further sealed with vacuum grease. The reaction mixture was shaken well at r.t. for 10 min. Then the sample was ready for EPR experiment.

X-band EPR spectra were recorded with a Bruker EMX-Plus spectrometer (Bruker BioSpin). Simulations of the EPR spectra were performed by iteration of the isotropic g-values and line widths using the EPR simulation software SpinFit in Xenon. Experimental X-band EPR isotropic spectra of  $\alpha$ -Co(III)-Aminyl Radical **I** in benzene was recorded at r.t. (Freq = 9.42 GHz; mod. amp. = 4 G; microwave power = 20 mW).

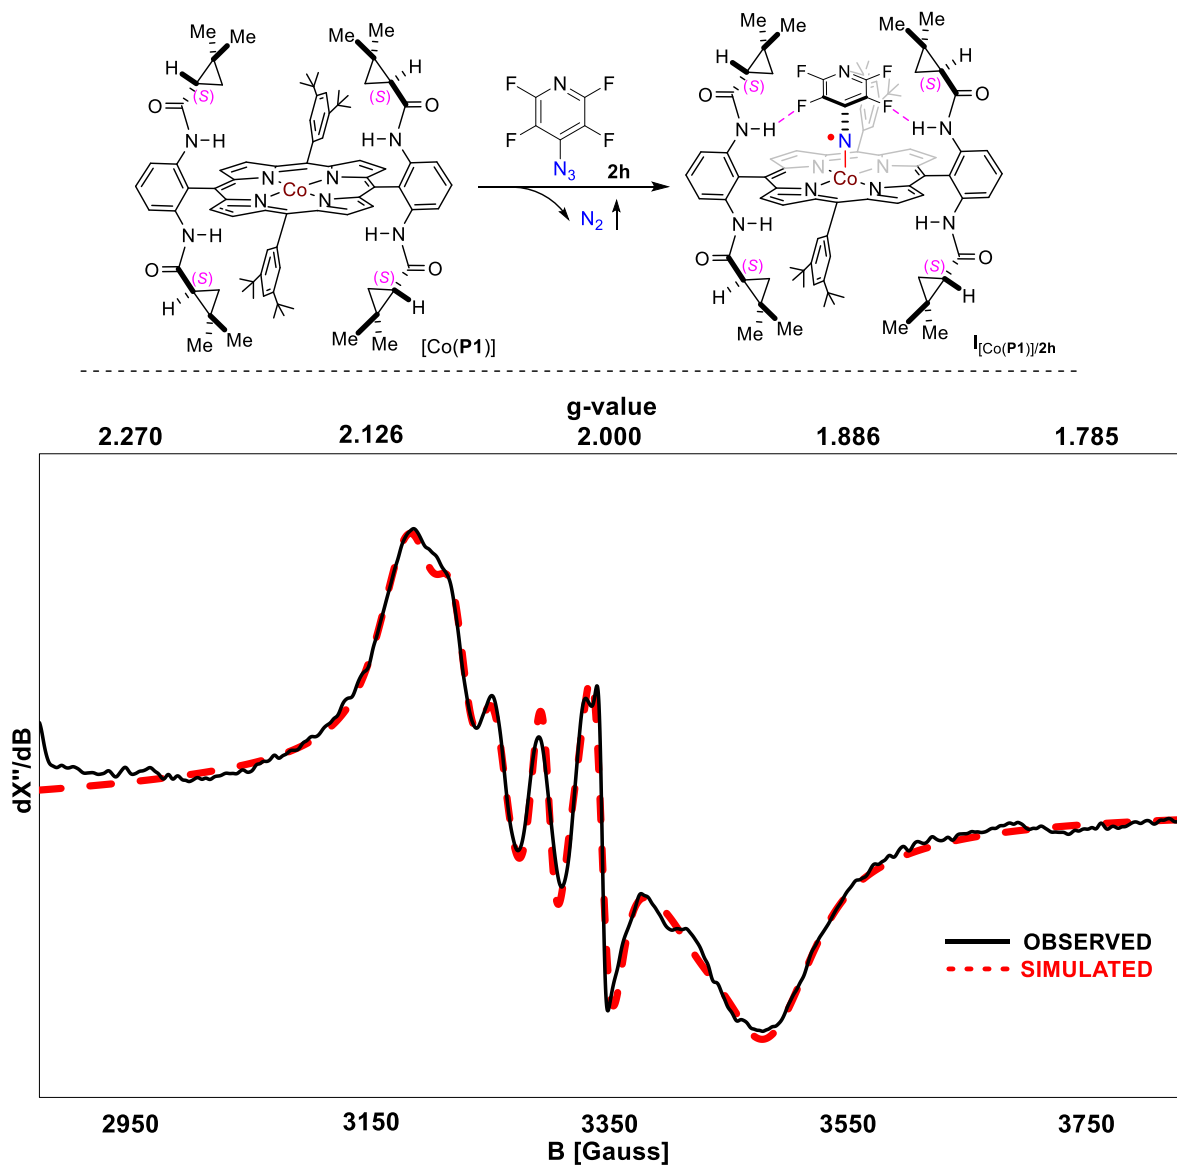

Experimental and simulated X-Band EPR spectra for  $\alpha$ -Co(III)-aminyl radical  $I_{[\text{Co}(\text{P1})]/2\text{h}}$  in benzene at r.t.

## EPR simulation details:

$$N\alpha I_{[Co(P1)]/2h}: 29140/(29140 + 2838 + 3533) = 82\%$$

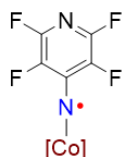

$$g = 2.04824$$

$$A_{(Co)} = 41.1307 \times 2.04824 \times 1.399611451 = 117.9 \text{ MHz}$$

$$A_{(N)} = 48.6516 \times 2.04824 \times 1.399611451 = 139.5 \text{ MHz}$$

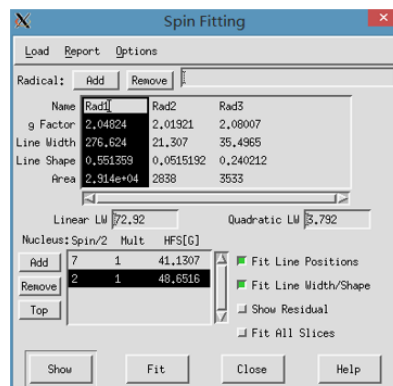

$$C\gamma I_{[Co(P1)]/2h}: 2838/(29140 + 2838 + 3533) = 8\%$$

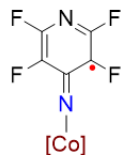

$$g = 2.01921$$

$$A_{(N)} = 24.4978 \times 2.01921 \times 1.399611451 = 69.2 \text{ MHz}$$

$$A_{(F)} = 46.0126 \times 2.01921 \times 1.399611451 = 130.0 \text{ MHz}$$

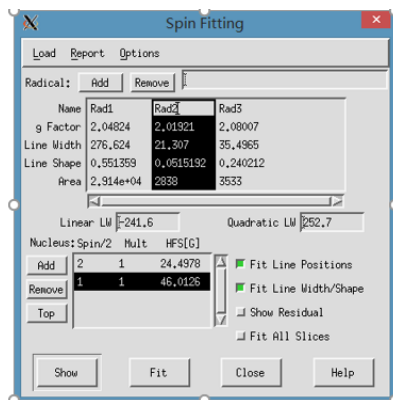

$$N\epsilon I_{[Co(P1)]/2h}: 3533/(29140 + 2838 + 3533) = 10\%$$

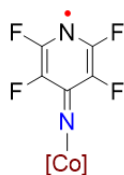

$$g = 2.08007$$

$$A_{(N)} = 32.9397 \times 2.08007 \times 1.399611451 = 95.9 \text{ MHz}$$

$$A_{(F)} = 0 \text{ MHz}$$

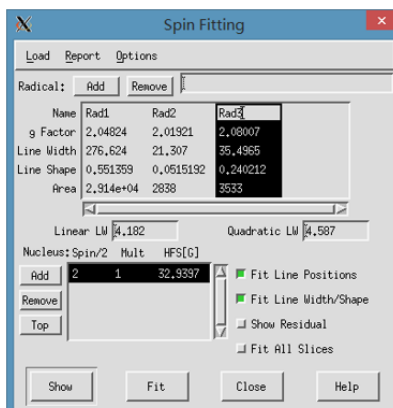



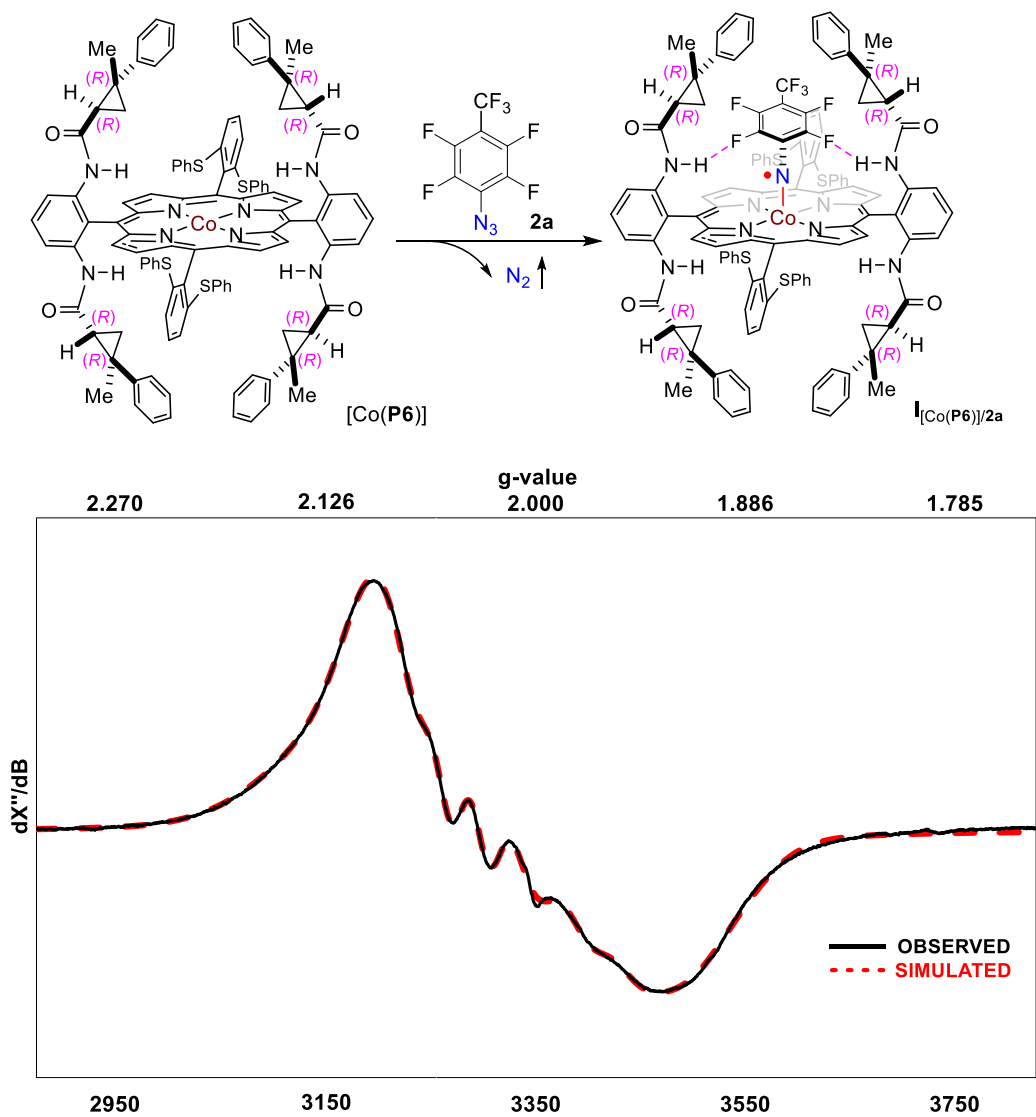

Experimental and simulated X-Band EPR spectra for  $\alpha$ -Co(III)-aminyl radical  $\mathbf{I}_{[\text{Co}(\text{P6})]/2\text{a}}$  in benzene at RT.

## EPR Simulation Details:

$$N\alpha I_{[Co(P6)]2a}: 71170/(71170 + 3078 + 6166) = 88\%$$

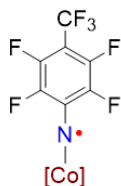

$$g = 2.01362$$

$$A(\text{Co}) = 41.4211 \times 2.01362 \times 1.399611451 = 116.7 \text{ MHz}$$

$$A(\text{N}) = 44.3268 \times 2.01362 \times 1.399611451 = 124.9 \text{ MHz}$$

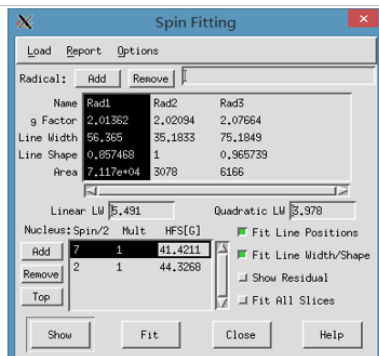

$$C\gamma I_{[Co(P6)]2a}: 3078/(71170 + 3078 + 6166) = 4\%$$

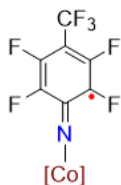

$$g = 2.02094$$

$$A(\text{N}) = 38.9999 \times 2.02094 \times 1.399611451 = 110.3 \text{ MHz}$$

$$A(\text{F}) = 28.6335 \times 2.02094 \times 1.399611451 = 81.0 \text{ MHz}$$

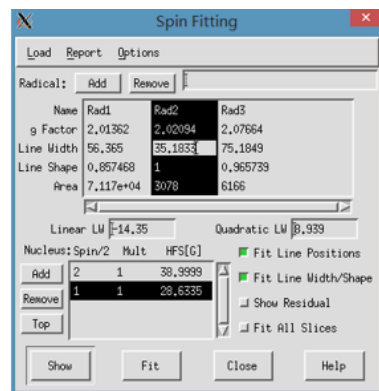

$$C\delta I_{[Co(P6)]}: 6166/(71170 + 3078 + 6166) = 8\%$$

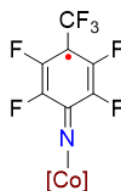

$$g = 2.07664$$

$$A(\text{N}) = 0 \text{ MHz}$$

$$A(\text{F}) = 0 \text{ MHz}$$

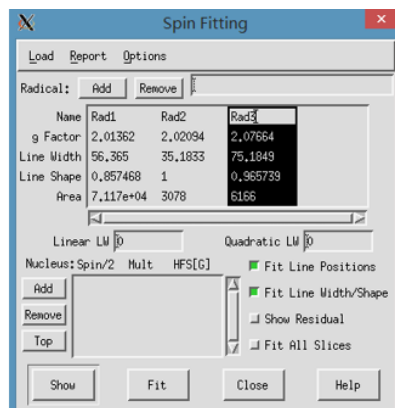

## 6.2. Procedure for HRMS Experiment

$\mathbf{I}_{[\text{Co}(\text{P1})]/2\text{h}}$  was further detected by high resolution mass spectrometry (HRMS) with ESI ionization. Through gas-tight syringe, the same EPR solution was transferred to a sealed HRMS sample vial, which was pre-evacuated and backfilled with nitrogen. The high-resolution mass spectra (LC-HRMS) (ESI) in the absence of any additives that commonly act as electron carriers for ionization allowed for the detection of the molecular ion signals corresponding to the  $\alpha$ -Co(III)-aminyl radical  $\mathbf{I}_{[\text{Co}(\text{P1})]/2\text{h}}$  ( $[\text{M}]^+$   $m/z = 1503.6881$  (observed)), by the loss of one electron (Figure S4).

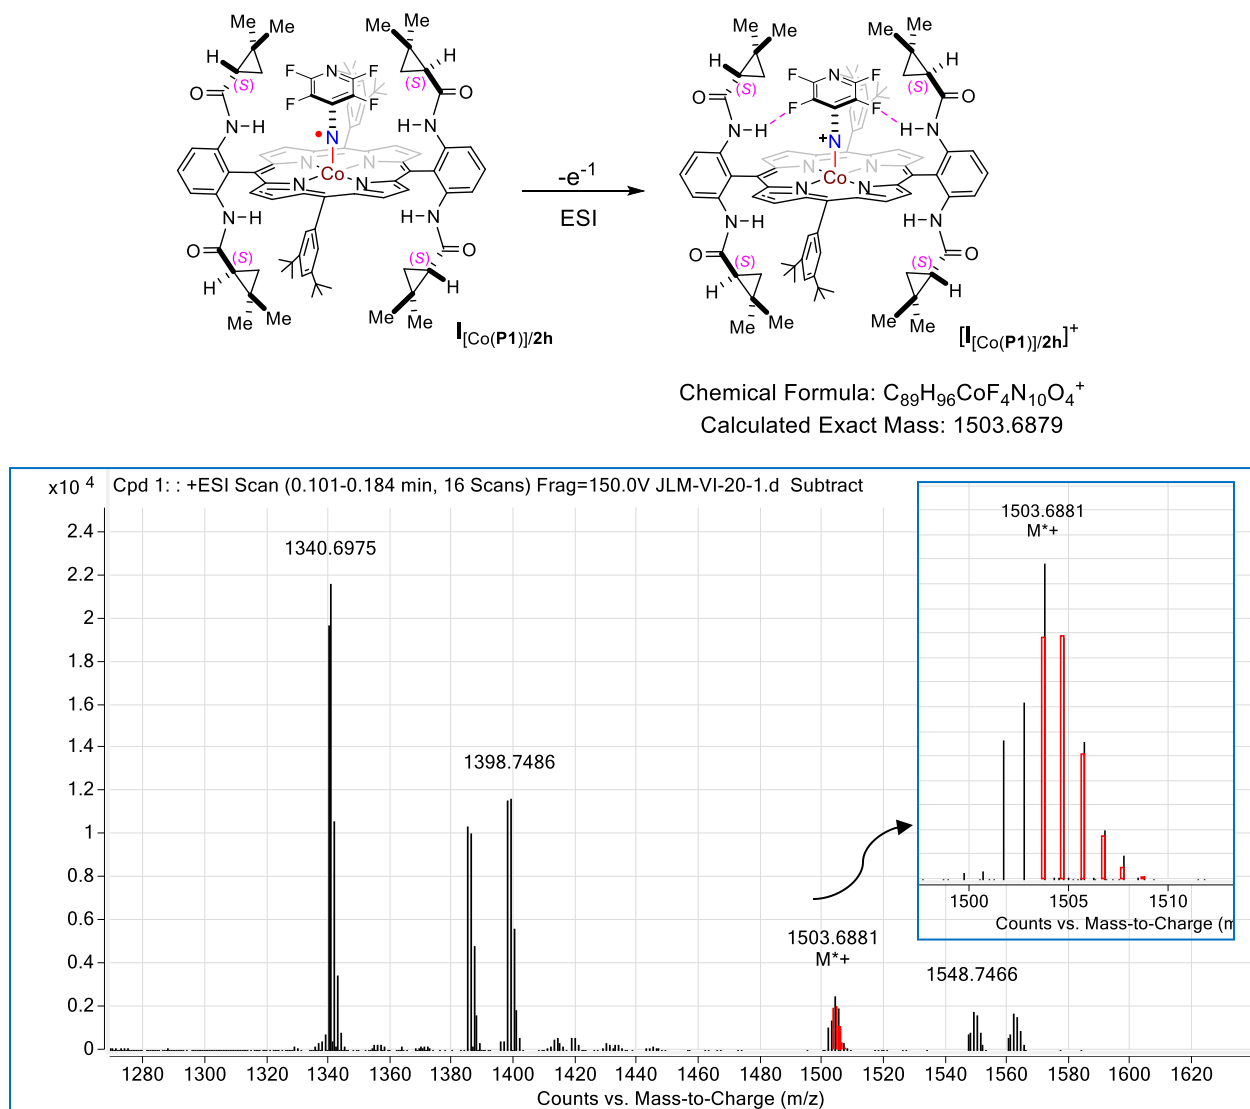

**Figure S4.** HR-ESI-MS spectrum of reaction mixture of azide **2h** and  $[\text{Co}(\text{P1})]$  (the inset red one is the simulated mass spectrum of  $\mathbf{I}_{[\text{Co}(\text{P1})]/2\text{h}}$ ).

## 7. Kinetic Isotope Effect (KIE) Experiment

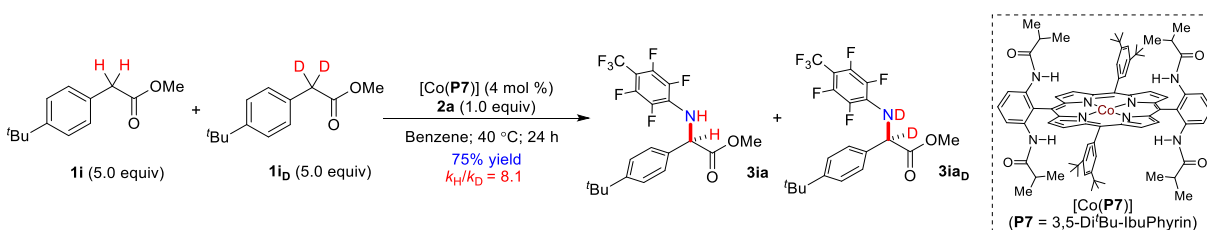

An oven dried Schlenk tube was charged with **[Co(P7)]** (4 mol %) and 4 Å molecular sieves. The Schlenk tube was then evacuated and back filled with nitrogen for three times. The Teflon screw cap was replaced with a rubber septum and methyl 2-(4-(*tert*-butyl)phenyl)acetate (**1i**, 1 mmol, 5.0 equiv), deuterated methyl 2-(4-(*tert*-butyl)phenyl)acetate (**1i<sub>D</sub>**, 1 mmol, 5.0 equiv), 4-trifluoromethyl-2,3,5,6-tetrafluorophenyl azide (**2a**, 0.2 mmol, 1 equiv) and benzene (0.5 mL) were added. The Schlenk tube was then purged with nitrogen for 30 s and the rubber septum was replaced with a Teflon screw cap. The mixture was then stirred at 40 °C for 24 h. After completion of the reaction, the reaction mixture was purified by flash column chromatography on silica gel to afford **3ia** together with **3ia<sub>D</sub>** in 75% overall yield. KIE ( $k_H/k_D$ ) was calculated as 8.1 based on <sup>1</sup>H-NMR analysis.

## 8. Evaluation of Electronic Effect of C–H Substrates via Hammett Study

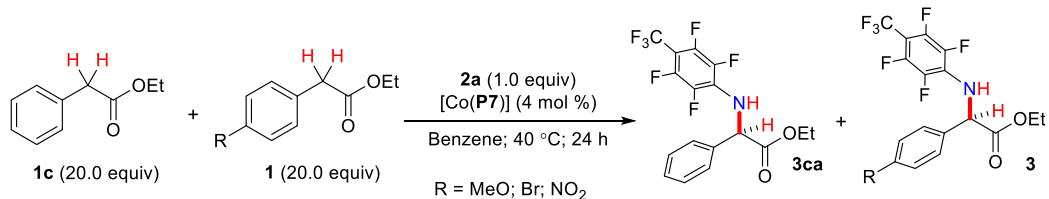

An oven dried Schlenk tube was charged with  $[\text{Co}(\text{P7})]$  (4 mol %) and 4 Å molecular sieves. The Schlenk tube was then evacuated for 30 s and back filled with nitrogen. The Teflon screw cap was replaced with a rubber septum and ethyl phenylacetate **1c** (1 mmol, 20 equiv), *para*-substituted methyl phenylacetate **1** (1 mmol, 20 equiv), 4-trifluoromethyl-2,3,5,6-tetrafluorophenyl azide (**2a**, 0.05 mmol, 1 equiv) and benzene (0.5 mL) were added. The Schlenk tube was then purged with nitrogen for 30 s and the rubber septum was replaced with a Teflon screw cap. The mixture was then stirred at 40 °C for 24 h. Following completion of the reaction, the distribution of the aminated products was determined by <sup>19</sup>F NMR: (1)  $k_{\text{H}}/k_{\text{Br}} = 100/79$ ; (2)  $k_{\text{MeO}}/k_{\text{NO}_2} = 100/15$ ; (3)  $k_{\text{H}}/k_{\text{NO}_2} = 100/26$ . Based on the eqs (1) – (3), the plot of linear free-energy correlation of  $\log(k_{\text{X}}/k_{\text{H}})$  versus  $\sigma_{\text{p}}$  was obtained as shown below.

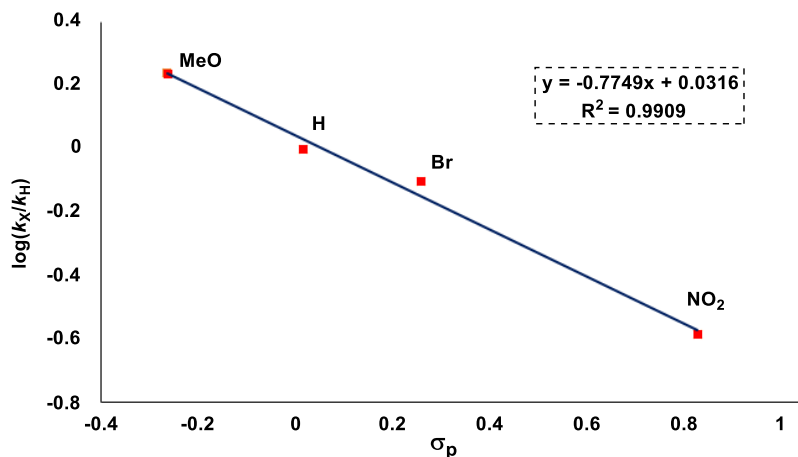

Correlation of  $\log(k_{\text{X}}/k_{\text{H}})$  versus  $\sigma_{\text{p}}$  plot for amination of *para*-substituted phenylacetates with azide **2a**.

## 9. Trapping of Alkyl Radical Intermediate

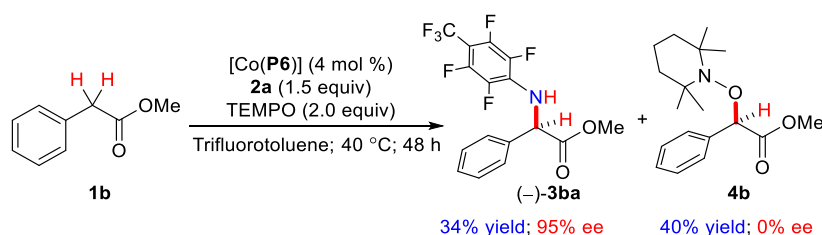

An oven-dried Schlenk tube was charged with [Co(P6)] (4 mol %) and 4 Å molecular sieves. The Schlenk tube was then evacuated and back filled with nitrogen. The Teflon screw cap was replaced with a rubber septum and methyl phenylacetate (**1b**, 0.1 mmol, 1 equiv), 4-trifluoromethyl-2,3,5,6-tetrafluorophenyl azide (**2a**, 0.15 mmol, 1.5 equiv), TEMPO (2 equiv) and  $\alpha,\alpha,\alpha$ -trifluorotoluene (0.5 mL) were added. The Schlenk tube was then purged with nitrogen for 30 s and the rubber septum was replaced with a Teflon screw cap. The mixture was then stirred at 40 °C for 48 h. Following completion of the reaction, the mixture was purified by column chromatography to give amide **3ba** (34% yield, 95% ee) and TEMPO trapped product **4b** (40% yield, 0% ee). **4b**:  $^1\text{H NMR}$  (600 MHz,  $\text{CDCl}_3$ )  $\delta$  7.44 (m, 2H), 7.33 (m, 2H), 7.29 (m, 1H), 5.21 (s, 1H), 3.65 (s, 3H), 1.51 – 1.25 (m, 6H), 1.23 (s, 3H), 1.13 (s, 3H), 1.07 (s, 3H), 0.71 (s, 3H).  $^{13}\text{C NMR}$  (150 MHz,  $\text{CDCl}_3$ )  $\delta$  172.45, 138.14, 128.31, 127.93, 126.87, 88.57, 59.89, 51.82, 40.21, 40.08, 33.53, 32.84, 20.13, 17.07. IR (neat,  $\text{cm}^{-1}$ ): 2930, 1752, 1738, 1160, 724, 696. HRMS (ESI) ( $[\text{M}+\text{H}]^+$ ) Calcd. for  $\text{C}_{18}\text{H}_{28}\text{NO}_3$ : 306.2064 found: 306.2067.

**Table S2. Investigation of Solvent Viscosity Effect using [Co(P7)]**

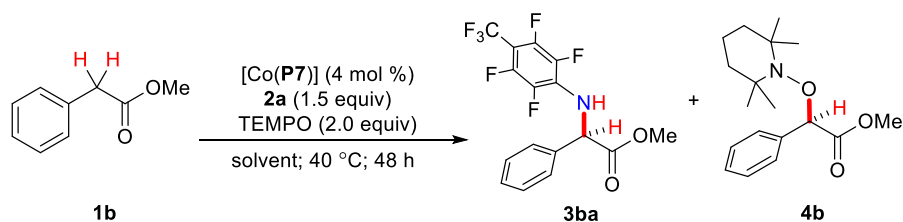

| Solvent             | Viscosity    | Yield of <b>3ba</b> | Yield of <b>4b</b> |
|---------------------|--------------|---------------------|--------------------|
| Hexane              | 0.31 (20 °C) | 19%                 | 48%                |
| Benzene             | 0.65 (20 °C) | 20%                 | 60%                |
| Trifluorotoluene    | --           | 19%                 | 42%                |
| Chlorobenzene       | 0.80 (20 °C) | 15%                 | 42%                |
| 1,2-Dichlorobenzene | 1.32 (25 °C) | 21%                 | 46%                |
| 1,4-Dioxane         | 1.44 (15 °C) | 0%                  | 7%                 |

## 10. Probing Allylic Radical via Olefin Isomerization

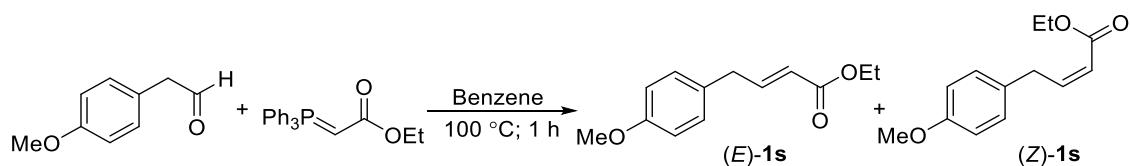

**(Z)-1s** was synthesized through Wittig reaction. To a solution of the 2-(4-methoxyphenyl)acetaldehyde (1.2 g, 8.0 mmol) in dry benzene (5 mL) was added  $\text{Ph}_3\text{P}=\text{CHCO}_2\text{Et}$  (2.79 g, 8.0 mmol) and stirred at reflux for 1 h. After completion of the reaction, the solvent was removed under reduced pressure and the residue purified by column chromatography eluted with hexane/EtOAc (40/1 v/v) to afford **1s** as a mixture of geometrical isomers. The mixture was partially separated by silica gel column chromatography to give **(E)-1s** (1.50 g, 85%) and pure **(Z)-1s** (150 mg, 9%). **(Z)-1s**:  $^1\text{H}$  NMR (600 MHz,  $\text{CDCl}_3$ )  $\delta$  7.15 (d,  $J = 8.6$  Hz, 2H), 6.85 (d,  $J = 8.6$  Hz, 2H), 6.32 (dt,  $J = 11.3, 7.6$  Hz, 1H), 5.83 (dt,  $J = 11.4, 1.8$  Hz, 1H), 4.22 (q,  $J = 7.2$  Hz, 2H), 3.96 (dd,  $J = 7.7, 1.8$  Hz, 2H), 3.79 (s, 3H), 1.32 (t,  $J = 7.1$  Hz, 3H).  $^{13}\text{C}$  NMR (150 MHz,  $\text{CDCl}_3$ )  $\delta$  166.34, 158.11, 148.31, 131.44, 129.49, 119.52, 113.97, 59.90, 55.19, 34.18, 14.23. IR (neat,  $\text{cm}^{-1}$ ): 2932, 1714, 1510, 1245, 1160, 823, 756. HRMS (DART) ( $[\text{M}+\text{H}]^+$ ) Calcd. for  $\text{C}_{13}\text{H}_{17}\text{O}_3$ : 221.11722 found: 221.11652.

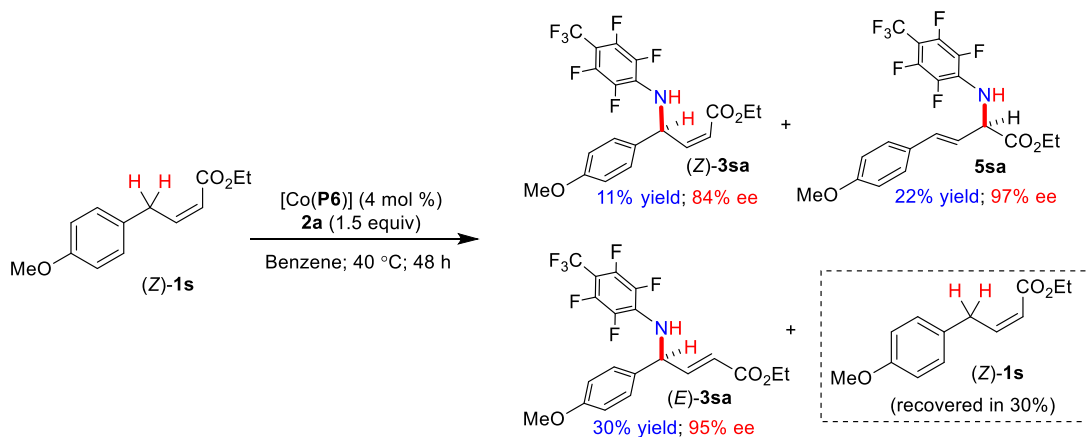

An oven dried Schlenk tube was charged with  $[\text{Co}(\text{P6})]$  (4 mol %) and 4 Å molecular sieves. The Schlenk tube was then evacuated and back filled with nitrogen for three times. The Teflon screw cap was replaced with a rubber septum and **(Z)-1s** (0.10 mmol, 1 equiv), 4-trifluoromethyl-2,3,5,6-tetrafluorophenyl azide (**2a**, 0.15 mmol, 1.5 equiv) and benzene (0.5 mL) were added. The Schlenk tube was then purged with nitrogen for 30 s and the rubber septum was replaced with a Teflon

screw cap. The mixture was then stirred at 40 °C. After 48 h, the reaction mixture was concentrated and the yields of all products are calculated based on crude <sup>1</sup>H NMR with 1,1,2,2-tetrachloroethane as internal standard ((*Z*)-**3sa**: 11% yield; **5sa**: 22% yield; (*E*)-**3sa**: 30% yield; (*Z*)-**1s**: 30% recovered). Crude mixture was purified by PTLC. For product (*Z*)-**3sa**:  $[\alpha]_D^{20} = -25^\circ$  ( $c = 0.3$ , CHCl<sub>3</sub>). <sup>1</sup>H NMR (500 MHz, CDCl<sub>3</sub>)  $\delta$  7.36 (d,  $J = 8.7$  Hz, 2H), 6.92 (d,  $J = 8.8$  Hz, 2H), 6.65 (m, 1H), 6.31 (dd,  $J = 11.5, 9.0$  Hz, 1H), 5.92 (dd,  $J = 11.4, 1.1$  Hz, 1H), 4.64 (d,  $J = 8.4$  Hz, 1H), 4.22 (m, 2H), 3.81 (s, 3H), 1.31 (t,  $J = 7.1$  Hz, 3H). <sup>19</sup>F NMR (470 MHz, CDCl<sub>3</sub>)  $\delta$  -55.04 (t,  $J = 20.8$  Hz, 3F), -142.91 (m, 2F), -158.65 (m, 2F). <sup>13</sup>C NMR (101 MHz, CDCl<sub>3</sub>)  $\delta$  165.44, 159.54, 147.04, 144.86 (dm,  $J = 245.3$  Hz), 136.85 (dm,  $J = 243.4$  Hz), 132.27, 129.95, 127.81, 121.49 (q,  $J = 270.0$  Hz), 120.97, 114.50, 60.64, 55.29 (2C), 14.12. IR (neat, cm<sup>-1</sup>): 3352, 2917, 1716, 1655, 1510, 1333, 1234, 1176, 972, 714. HRMS (DART) ([M+H]<sup>+</sup>) Calcd. for: C<sub>20</sub>H<sub>17</sub>F<sub>7</sub>NO<sub>3</sub>: 452.10912, Found: 452.10941. HPLC analysis: ee = 84%. IA (95% hexane: 5% isopropanol, 0.8 ml/min):  $t_{major} = 8.24$  min,  $t_{minor} = 7.81$  min. For product **5sa**:  $[\alpha]_D^{20} = -50^\circ$  ( $c = 0.5$ , CHCl<sub>3</sub>). <sup>1</sup>H NMR (500 MHz, CDCl<sub>3</sub>)  $\delta$  7.32 (d,  $J = 7.8$  Hz, 2H), 6.87 (d,  $J = 7.7$  Hz, 2H), 6.69 (d,  $J = 15.8$  Hz, 1H), 6.04 (dd,  $J = 15.8, 6.6$  Hz, 1H), 5.12 (m, 2H), 4.30 (m, 2H), 3.82 (s, 3H), 1.32 (t,  $J = 7.1$  Hz, 3H). <sup>19</sup>F NMR (470 MHz, CDCl<sub>3</sub>)  $\delta$  -55.04 (t,  $J = 20.8$  Hz, 3F), -142.91 (m, 2F), -158.65 (m, 2F). <sup>13</sup>C NMR (100 MHz, CDCl<sub>3</sub>)  $\delta$  170.76, 159.95, 144.81 (dm,  $J = 266.2$  Hz), 136.77 (dm,  $J = 243.8$  Hz), 134.00, 128.04, 121.43 (q,  $J = 272.6$  Hz), 121.37, 114.09, 94.04 (m), 62.37, 58.82, 55.32, 14.09. IR (neat, cm<sup>-1</sup>): 3391, 2938, 1737, 1511, 1334, 1133, 993, 713. HRMS (ESI) ([M-H]<sup>-</sup>) Calcd. for: C<sub>20</sub>H<sub>15</sub>F<sub>7</sub>NO<sub>3</sub>: 450.0946, Found: 450.0951. HPLC analysis: ee = 97%. IA (95% hexane: 5% isopropanol, 0.8 ml/min):  $t_{major} = 7.46$  min,  $t_{minor} = 8.22$  min.



## 11. Evaluation of Diastereoselectivity with Chiral C–H Substrates

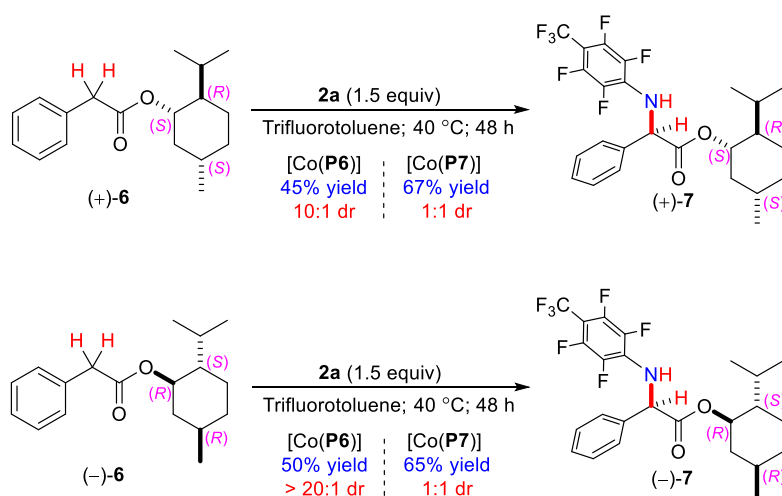

First, the reactions were performed with (+)-**6** (**14**) using [Co(**P6**)] or [Co(**P7**)] as catalyst respectively following the general procedure using 1.5 equiv of azide **2a** with  $\alpha,\alpha,\alpha$ -trifluorotoluene as solvent. After 48 hours, the dr of products were determined by crude  $^{19}\text{F}$  NMR. The results indicated that when [Co(**P6**)] is used as catalyst, (+)-**7** could be obtained in 45% yield with the dr of 10/1. When [Co(**P7**)] was used as catalyst, (+)-**7** could be obtained in 67% yield with the dr of 1/1. Similar results were achieved when using (-)-**6** as starting material using [Co(**P6**)] or [Co(**P7**)] as catalyst respectively. When [Co(**P6**)] was used as catalyst, (-)-**7** could be obtained in 50% yield with the dr of >20/1. When [Co(**P7**)] was used as catalyst, (-)-**7** could be obtained in 65% yield with the dr of 1/1. (-)-**7**:  $^1\text{H}$  NMR (500 MHz,  $\text{CDCl}_3$ )  $\delta$  7.39 – 7.31 (m, 5H), 5.58 (d,  $J = 7.5$  Hz, 1H), 5.42 (d,  $J = 7.8$  Hz, 1H), 4.65 (td,  $J = 11.0, 4.4$  Hz, 1H), 2.03 (d,  $J = 11.0$  Hz, 1H), 1.71 – 1.62 (m, 1H), 1.53 – 1.41 (m, 1H), 1.29 – 1.19 (m, 2H), 1.05 (q,  $J = 11.9$  Hz, 1H), 0.97 – 0.76 (m, 6H), 0.55 (d,  $J = 7.0$  Hz, 3H), 0.33 (d,  $J = 6.9$  Hz, 3H).  $^{13}\text{C}$  NMR (125 MHz,  $\text{CDCl}_3$ )  $\delta$  170.43, 144.73 (dm,  $J = 257.6$  Hz), 136.95, 136.91 (dm,  $J = 242.0$  Hz), 129.21 (m), 128.91, 128.88, 126.96, 121.42 (q,  $J = 272.8$  Hz), 97.29 (m), 60.76, 47.09, 40.67, 34.03, 31.40, 25.29, 22.88, 21.92, 20.41, 15.45.  $^{19}\text{F}$  NMR (376 MHz,  $\text{CDCl}_3$ ):  $\delta$  -55.08 (t,  $J = 20.9$  Hz), -143.01 (m, 3F), -158.67 (m, 2F). IR (neat,  $\text{cm}^{-1}$ ): 2954, 2927, 2869, 1497, 1333, 1256, 1137, 986, 695. HRMS (DART) ( $[\text{M}+\text{H}]^+$ ) Calcd. for:  $\text{C}_{25}\text{H}_{27}\text{F}_7\text{NO}_2$ : 506.19245, Found: 506.18992.

## 12. X-ray Crystallographic Information

### 12.1. Single-crystal X-ray Structure of P6

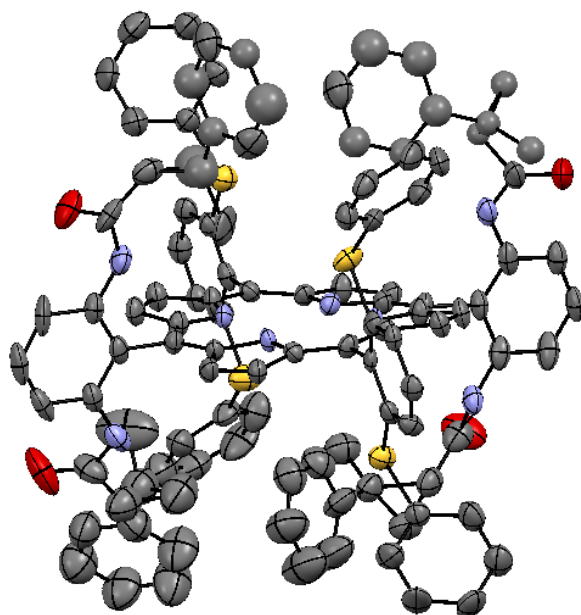

Single-crystal X-ray structure of P6 with thermal ellipsoids drawn at 50% probability

**P6:** The majority of non-hydrogen atoms were refined anisotropically. Several side arms of porphyrin molecules are disordered over two positions with 1:1 ratio of disordered parts (fixed). Some of disordered atoms have been refined isotropically. Disordered parts have been refined using distance and angular restraints (DFIX, DANG) and constraints (AFIX 66) to keep the geometry chemically feasible. All disordered solvent molecules of toluene, and 1,4-dioxane have been refined using geometry restraints and constraints. There are two symmetrically independent porphyrin molecules in the crystal structure.

**Crystal Data and Structure Refinement for P6.**

|                                             |                                                                                  |
|---------------------------------------------|----------------------------------------------------------------------------------|
| Identification code                         | <b>P6</b>                                                                        |
| Empirical formula                           | C <sub>256</sub> H <sub>222</sub> N <sub>16</sub> O <sub>11</sub> S <sub>8</sub> |
| Formula weight                              | 3954.98                                                                          |
| Temperature/K                               | 100(2)                                                                           |
| Crystal system                              | triclinic                                                                        |
| Space group                                 | P1                                                                               |
| a/Å                                         | 13.1087(5)                                                                       |
| b/Å                                         | 15.9083(5)                                                                       |
| c/Å                                         | 26.9265(10)                                                                      |
| α/°                                         | 90.115(2)                                                                        |
| β/°                                         | 101.243(2)                                                                       |
| γ/°                                         | 102.434(2)                                                                       |
| Volume/Å <sup>3</sup>                       | 5372.6(3)                                                                        |
| Z                                           | 1                                                                                |
| ρ <sub>calc</sub> /mm <sup>3</sup>          | 1.222                                                                            |
| m/mm <sup>-1</sup>                          | 1.285                                                                            |
| F(000)                                      | 2086.0                                                                           |
| Crystal size/mm <sup>3</sup>                | 0.11 × 0.1 × 0.08                                                                |
| Radiation                                   | CuKα (λ = 1.54178)                                                               |
| 2θ range for data collection                | 6.7 to 131.96°                                                                   |
| Index ranges                                | -15 ≤ h ≤ 15, -18 ≤ k ≤ 18, -31 ≤ l ≤ 31                                         |
| Reflections collected                       | 66612                                                                            |
| Independent reflections                     | 32728 [R <sub>int</sub> = 0.0795, R <sub>sigma</sub> = 0.1105]                   |
| Data/restraints/parameters                  | 32728/285/2534                                                                   |
| Goodness-of-fit on F <sup>2</sup>           | 1.020                                                                            |
| Final R indexes [I ≥ 2σ (I)]                | R <sub>1</sub> = 0.0958, wR <sub>2</sub> = 0.2392                                |
| Final R indexes [all data]                  | R <sub>1</sub> = 0.1442, wR <sub>2</sub> = 0.2766                                |
| Largest diff. peak/hole / e Å <sup>-3</sup> | 0.62/-0.46                                                                       |
| Flack parameter                             | 0.09(2)                                                                          |

## 12.2. Single-crystal X-ray Structure of 3ha

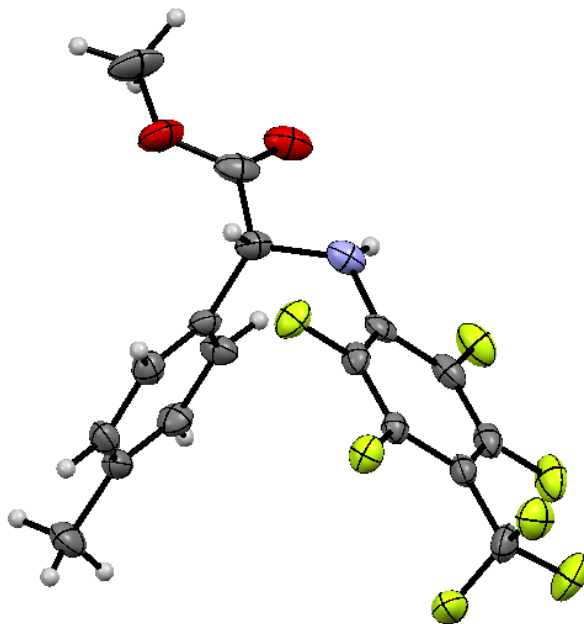

Single-crystal X-ray structure of **3ha** with thermal ellipsoids drawn at 50% probability

**3ha**: All non-hydrogen atoms were refined anisotropically. Hydrogen atom of –NH groups has been found from Fourier difference map and were freely refined. Remaining hydrogen atoms were placed in geometrically calculated positions and included in the refinement process using riding model with isotropic thermal parameters:  $U_{iso}(H) = 1.2[1.5]U_{eq}(-CH[-CH_3])$ . Disorderd -CF<sub>3</sub> group has been refined with SADI restraints.

**Crystal Data and Structure Refinement for 3ha**

|                                   |                                                                                                                                     |
|-----------------------------------|-------------------------------------------------------------------------------------------------------------------------------------|
| Identification code               | <b>3ha</b>                                                                                                                          |
| Empirical formula                 | C17 H12 F7 N O2                                                                                                                     |
| Formula weight                    | 395.28                                                                                                                              |
| Temperature                       | 100(2) K                                                                                                                            |
| Wavelength                        | 1.54178 Å                                                                                                                           |
| Crystal system, space group       | Triclinic, P1                                                                                                                       |
| Unit cell dimensions              | a = 9.1989(3) Å    alpha = 92.451(2) deg.<br>b = 9.2630(3) Å    beta = 103.071(2) deg.<br>c = 9.9868(3) Å    gamma = 94.018(2) deg. |
| Volume                            | 825.38(5) Å <sup>3</sup>                                                                                                            |
| Z, Calculated density             | 2, 1.590 Mg/m <sup>3</sup>                                                                                                          |
| Absorption coefficient            | 1.406 mm <sup>-1</sup>                                                                                                              |
| F(000)                            | 400                                                                                                                                 |
| Crystal size                      | 0.12 x 0.06 x 0.03 mm                                                                                                               |
| Theta range for data collection   | 4.55 to 68.70 deg.                                                                                                                  |
| Limiting indices                  | -11<=h<=11, -11<=k<=11, -12<=l<=11                                                                                                  |
| Reflections collected / unique    | 10750 / 5264 [R(int) = 0.0374]                                                                                                      |
| Completeness to theta = 66.60     | 97.7 %                                                                                                                              |
| Absorption correction             | Semi-empirical from equivalents                                                                                                     |
| Max. and min. transmission        | 0.9590 and 0.8494                                                                                                                   |
| Refinement method                 | Full-matrix least-squares on F <sup>2</sup>                                                                                         |
| Data / restraints / parameters    | 5264 / 31 / 536                                                                                                                     |
| Goodness-of-fit on F <sup>2</sup> | 1.057                                                                                                                               |
| Final R indices [I>2sigma(I)]     | R1 = 0.0403, wR2 = 0.0837                                                                                                           |
| R indices (all data)              | R1 = 0.0506, wR2 = 0.0888                                                                                                           |
| Absolute structure parameter      | 0.08(11)                                                                                                                            |
| Largest diff. peak and hole       | 0.345 and -0.203 e.Å <sup>-3</sup>                                                                                                  |

### 12.3. Single-crystal X-ray Structure of **3ma**

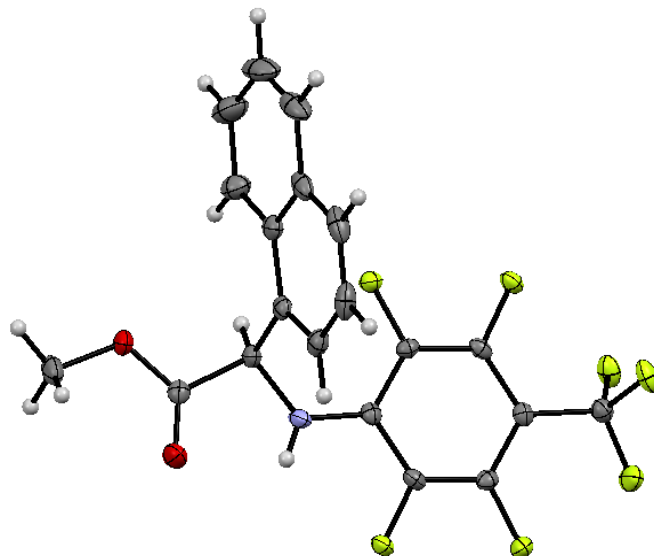

Single-crystal X-ray structure of **3ma** with thermal ellipsoids drawn at 50% probability.

**3ma:** All non-hydrogen atoms were refined anisotropically. The hydrogen atom of –NH group has been found from difference Fourier map and was freely refined. Remaining hydrogen atoms were placed in geometrically calculated positions and included in the refinement process using riding model with isotropic thermal parameters:  $U_{iso}(H) = 1.2U_{eq}(-CH)$  and  $U_{iso}(H) = 1.5U_{eq}(-CH_3)$ .

**Crystal Data and Structure Refinement for 3ma**

|                                             |                                                                |
|---------------------------------------------|----------------------------------------------------------------|
| Identification code                         | <b>3ma</b>                                                     |
| Empirical formula                           | C <sub>20</sub> H <sub>12</sub> F <sub>7</sub> NO <sub>2</sub> |
| Formula weight                              | 431.31                                                         |
| Temperature/K                               | 100(2)                                                         |
| Crystal system                              | orthorhombic                                                   |
| Space group                                 | P212121                                                        |
| a/Å                                         | 7.9791(2)                                                      |
| b/Å                                         | 8.3129(2)                                                      |
| c/Å                                         | 26.4307(6)                                                     |
| α/°                                         | 90                                                             |
| β/°                                         | 90                                                             |
| γ/°                                         | 90                                                             |
| Volume/Å <sup>3</sup>                       | 1753.13(7)                                                     |
| Z                                           | 4                                                              |
| ρ <sub>calc</sub> /mm <sup>3</sup>          | 1.634                                                          |
| m/mm <sup>-1</sup>                          | 1.386                                                          |
| F(000)                                      | 872.0                                                          |
| Crystal size/mm <sup>3</sup>                | 0.12 × 0.03 × 0.02                                             |
| Radiation                                   | CuKα (λ = 1.54178)                                             |
| 2θ range for data collection                | 6.688 to 137.756°                                              |
| Index ranges                                | -9 ≤ h ≤ 9, -9 ≤ k ≤ 10, -29 ≤ l ≤ 31                          |
| Reflections collected                       | 23084                                                          |
| Independent reflections                     | 3224 [R <sub>int</sub> = 0.0406, R <sub>sigma</sub> = 0.0218]  |
| Data/restraints/parameters                  | 3224/0/276                                                     |
| Goodness-of-fit on F <sup>2</sup>           | 1.064                                                          |
| Final R indexes [I ≥ 2σ (I)]                | R <sub>1</sub> = 0.0256, wR <sub>2</sub> = 0.0596              |
| Final R indexes [all data]                  | R <sub>1</sub> = 0.0294, wR <sub>2</sub> = 0.0613              |
| Largest diff. peak/hole / e Å <sup>-3</sup> | 0.20/-0.20                                                     |

#### 12.4. Single-crystal X-ray Structure of 3va

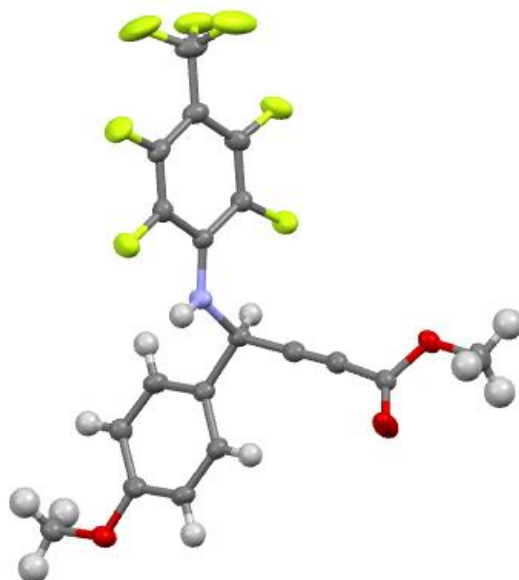

Single-crystal X-ray structure of 3va with thermal ellipsoids drawn at 50% probability



**Crystal Data and Structure Refinement for 3va**

|                                   |                                                                 |
|-----------------------------------|-----------------------------------------------------------------|
| Identification code               | <b>3va</b>                                                      |
| Empirical formula                 | C <sub>19</sub> H <sub>12</sub> F <sub>7</sub> N O <sub>3</sub> |
| Formula weight                    | 435.30                                                          |
| Temperature                       | 173(2) K                                                        |
| Wavelength                        | 1.54178 Å                                                       |
| Crystal system                    | Monoclinic                                                      |
| Space group                       | P2 <sub>1</sub>                                                 |
| Unit cell dimensions              | a = 5.5696(4) Å<br>b = 9.1428(7) Å<br>c = 17.2564(13) Å         |
| Volume                            | 878.62(11) Å <sup>3</sup>                                       |
| Z                                 | 2                                                               |
| Density (calculated)              | 1.645 Mg/m <sup>3</sup>                                         |
| Absorption coefficient            | 1.431 mm <sup>-1</sup>                                          |
| F(000)                            | 440                                                             |
| Crystal size                      | 0.580 x 0.140 x 0.100 mm <sup>3</sup>                           |
| Theta range for data collection   | 5.127 to 66.601°                                                |
| Index ranges                      | -6<=h<=6, -10<=k<=10, -20<=l<=20                                |
| Reflections collected             | 16507                                                           |
| Independent reflections           | 3075 [R(int) = 0.0309]                                          |
| Completeness to theta = 66.601°   | 99.3 %                                                          |
| Absorption correction             | Semi-empirical from equivalents                                 |
| Max. and min. transmission        | 0.7528 and 0.5842                                               |
| Refinement method                 | Full-matrix least-squares on F <sup>2</sup>                     |
| Data / restraints / parameters    | 3075 / 2 / 276                                                  |
| Goodness-of-fit on F <sup>2</sup> | 1.053                                                           |
| Final R indices [I>2sigma(I)]     | R1 = 0.0289, wR2 = 0.0765                                       |
| R indices (all data)              | R1 = 0.0291, wR2 = 0.0769                                       |
| Absolute structure parameter      | -0.02(4)                                                        |
| Extinction coefficient            | n/a                                                             |
| Largest diff. peak and hole       | 0.226 and -0.231 e.Å <sup>-3</sup>                              |

### 13. Reference

1. X. Huang, R. D. Webster, K. Harms, E. Meggers, Asymmetric Catalysis with Organic Azides and Diazo Compounds Initiated by Photoinduced Electron Transfer. *J. Am. Chem. Soc.* **138**, 12636 (2016).
2. L. M. Jin, X. Xu, H. J. Lu, X. Cui, L. Wojtas, X. P. Zhang, Effective Synthesis of Chiral N-Fluoroaryl Aziridines through Enantioselective Aziridination of Alkenes with Fluoroaryl Azides. *Angew. Chem. Int. Ed.* **52**, 5309 (2013).
3. Y. Chen, K. B. Fields, X. P. Zhang, Bromoporphyrins as Versatile Synthons for Modular Construction of Chiral Porphyrins: Cobalt-Catalyzed Highly Enantioselective and Diastereoselective Cyclopropanation. *J. Am. Chem. Soc.* **126**, 14718 (2004).
4. M. M. Pollard, J. C. Vederas, A Convenient Preparation of Thioether Functionalized Porphyrins. *Tetrahedron* **62**, 11908 (2006).
5. X. Xu, H. J. Lu, J. V. Ruppel, X. Cui, S. L. de Mesa, L. Wojtas, X. P. Zhang, Highly Asymmetric Intramolecular Cyclopropanation of Acceptor-Substituted Diazoacetates by Co(II)-Based Metalloradical Catalysis: Iterative Approach for Development of New-Generation Catalysts. *J. Am. Chem. Soc.* **133**, 15292 (2011).
6. K. A. Davies, R. C. Abel, J. E. Wulff, Operationally Simple Copper-Promoted Coupling of Terminal Alkynes with Benzyl Halides. *J. Org. Chem.* **74**, 3997 (2009).
7. M. Goswami, V. Lyaskovskyy, S. R. Domingos, W. J. Buma, S. Woutersen, O. Troeppner, I. Ivanović-Burmazović, H. Lu, X. Cui, X. P. Zhang, E. J. Reijerse, S. DeBeer, M. M. van Schooneveld, F. F. Pfaff, K. Ray, B. de Bruin, Characterization of Porphyrin-Co(III)-'Nitrene Radical' Species Relevant in Catalytic Nitrene Transfer Reactions. *J. Am. Chem. Soc.* **137**, 5468 (2015).
8. N. E. Schultz, Y. Zhao, D. G. Truhlar, Density Functionals for Inorganometallic and Organometallic Chemistry. *J. Phys. Chem. A* **109**, 11127 (2005).
9. K. Lang, S. Torker, L. Wojtas, X. P. Zhang, Asymmetric Induction and Enantiodivergence in Catalytic Radical C-H Amination via Enantiodifferentiative H-Atom Abstraction and Stereoretentive Radical Substitution. *J. Am. Chem. Soc.* **141**, 12388 (2019).
10. K. Eichkorn, F. Weigend, O. Treutler, R. Ahlrichs, Auxiliary Basis Sets for Main Row Atoms and Transition Metals and Their Use to Approximate Coulomb Potentials. *Theor. Chem. Acc.* **97**, 119 (1997).

11. K. Fukui, The Path of Chemical Reactions - the IRC approach. *Acc. Chem. Res.* **14**, 363 (1981).
12. S. Grimme, J. Antony, S. Ehrlich, H. Krieg, A Consistent and Accurate ab Initio Parametrization of Density Functional Dispersion Correction (DFT-D) for The 94 Elements H-Pu. *J. Chem. Phys.* **132**, 154104 (2010).
13. A. V. Marenich, C. J. Cramer, D. G. Truhlar, Universal Solvation Model Based on Solute Electron Density and on a Continuum Model of the Solvent Defined by the Bulk Dielectric Constant and Atomic Surface Tensions. *J. Phys. Chem. B.* **113**, 6378 (2009).
14. E. J. Park, S. Lee, S. Chang, Acetone Cyanohydrin as a Source of HCN in the Cu-Catalyzed Hydrocyanation of  $\alpha$ -Aryl Diazoacetates. *J. Org. Chem.* **75**, 2760 (2010).

**Copies of NMR/HPLC Spectra**

<sup>1</sup>H NMR

7.233  
7.216  
6.872  
6.856

3.792  
3.767  
3.675

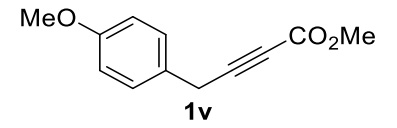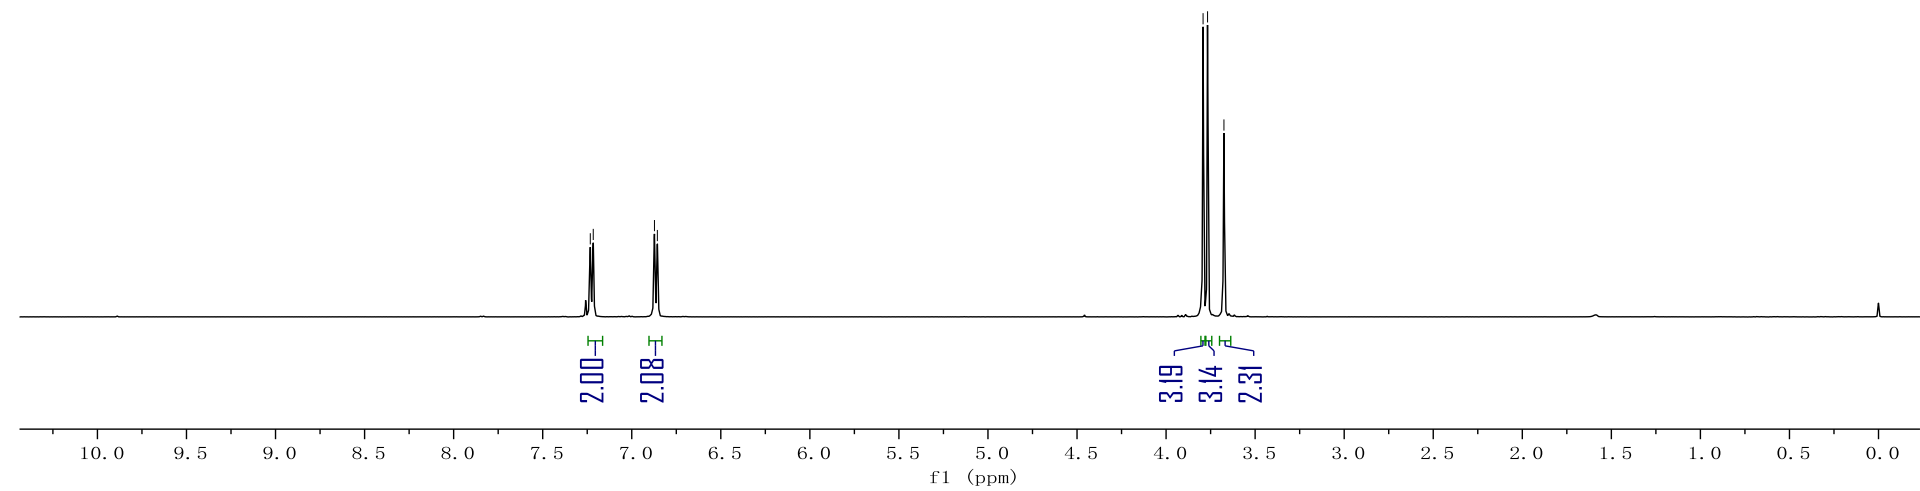

# $^{13}\text{C}$ NMR

— 158.760

— 154.123

— 129.010

— 125.945

— 114.182

— 87.195

77.265

77.011

76.756

74.272

55.291

52.601

— 24.145

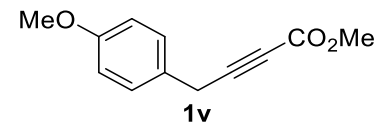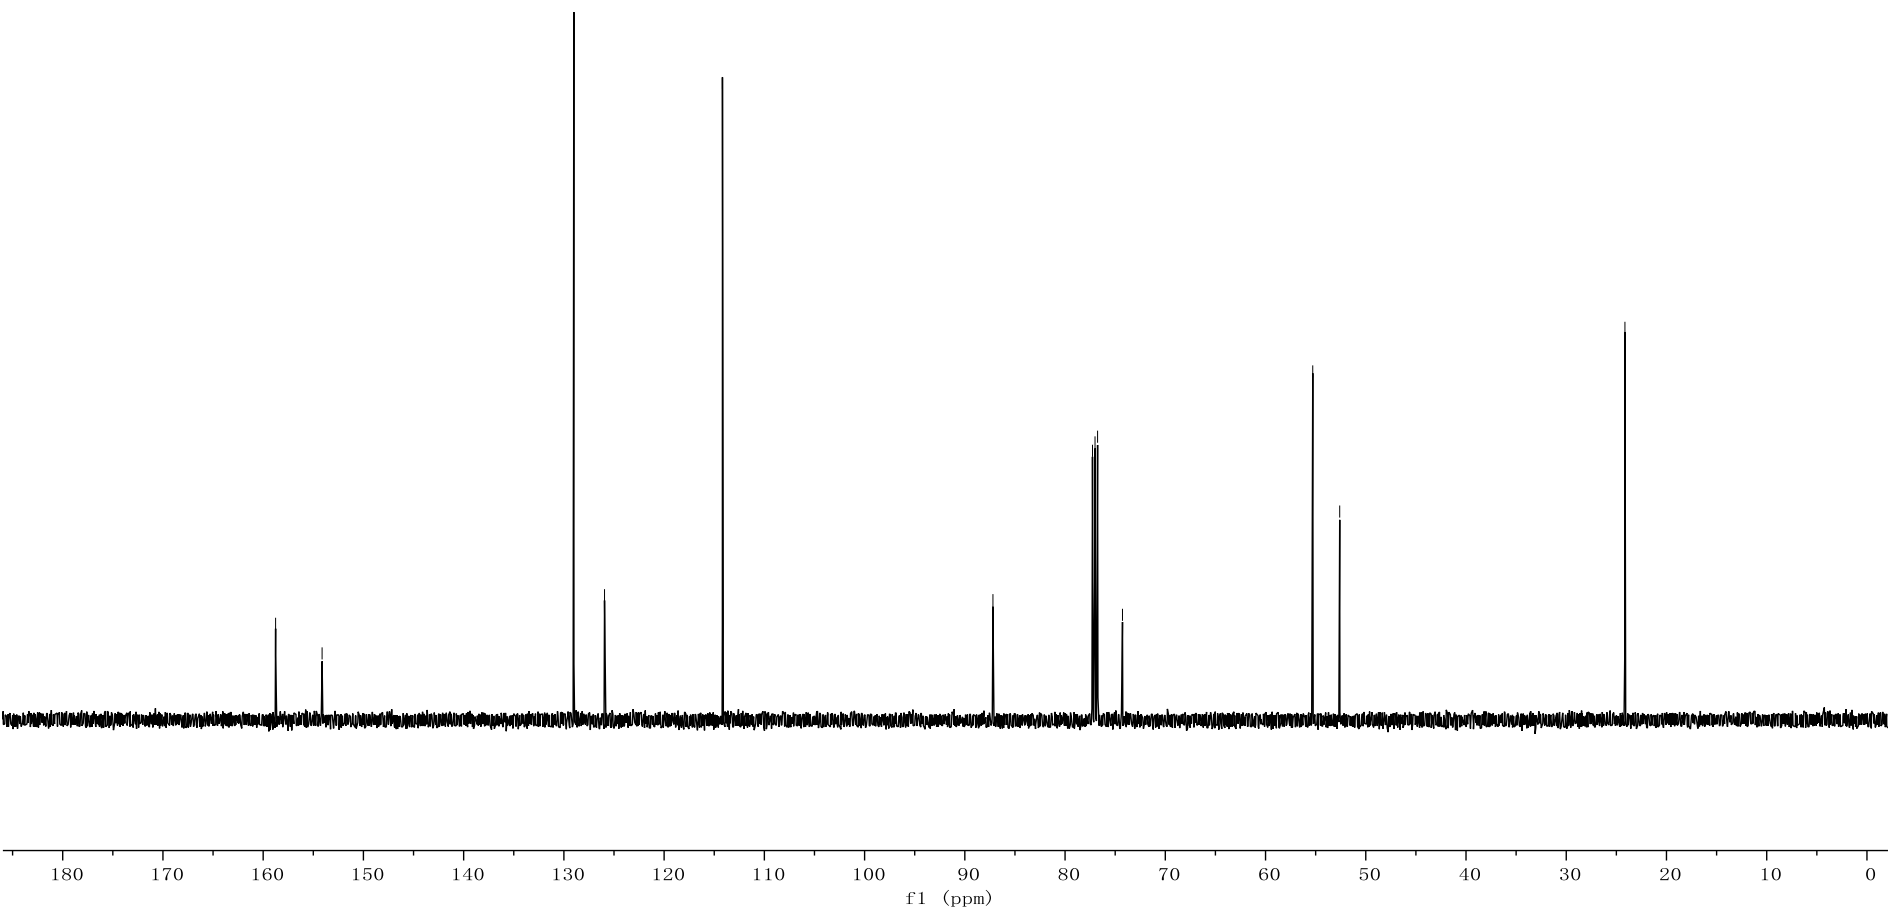

# $^1\text{H}$ NMR

7.411  
7.398  
7.260  
7.250  
7.236  
6.957  
6.945  
6.932  
6.854  
6.840

3.827  
3.764  
3.702

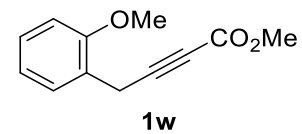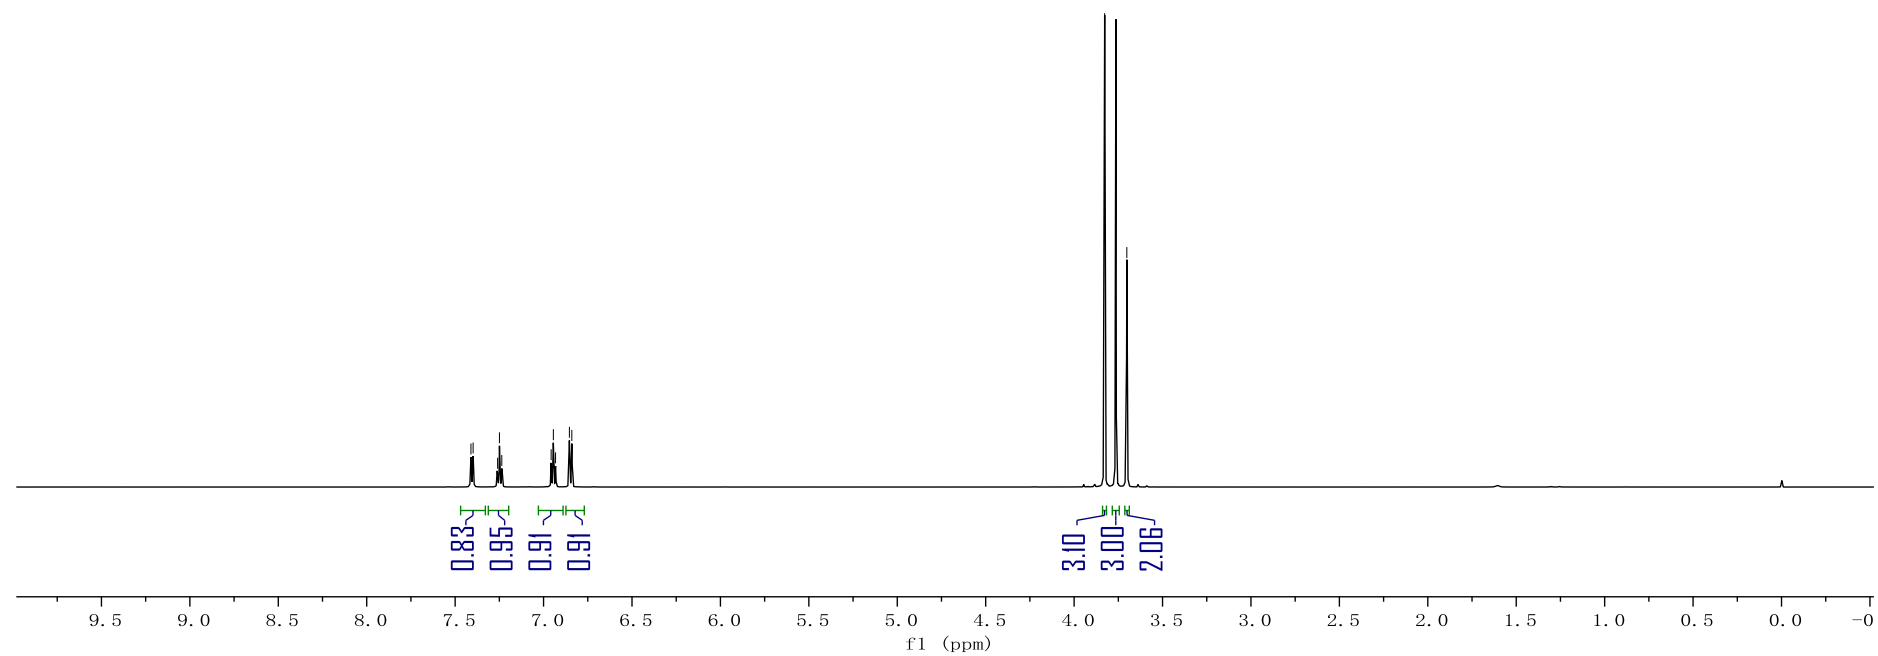

<sup>13</sup>C NMR

156.640  
154.183

128.910  
128.466  
122.441  
120.560

110.108

87.192

77.213  
77.001  
76.789  
74.207

55.277  
52.587

19.454

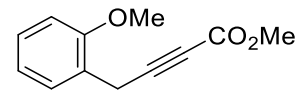

1w

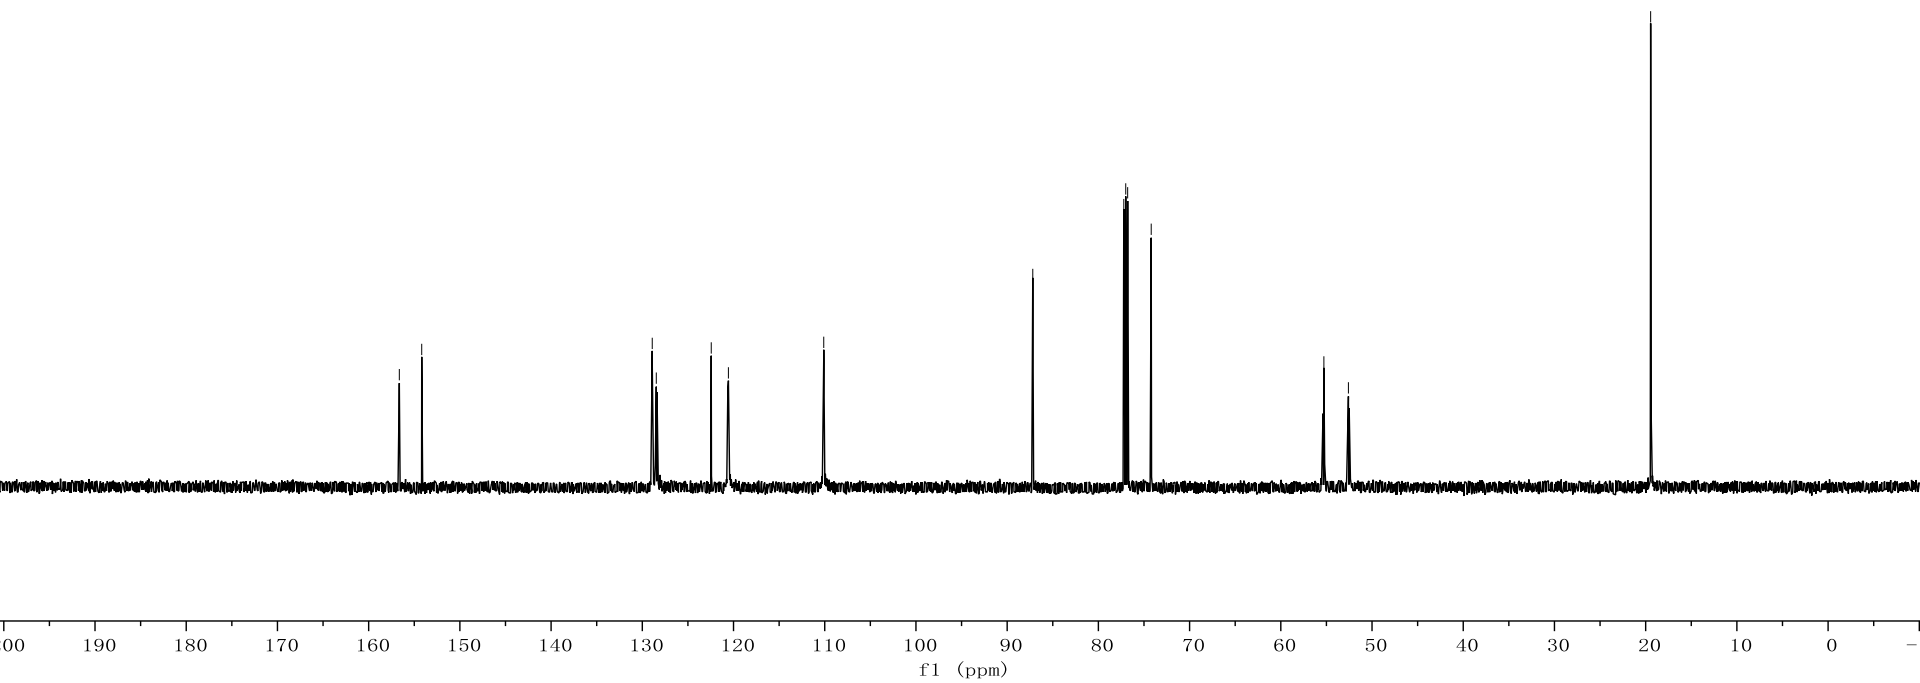

# <sup>1</sup>H NMR

6.801  
6.799  
6.753

5.943

3.768  
3.767  
3.644

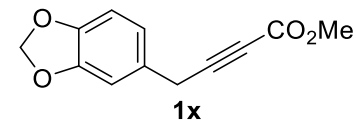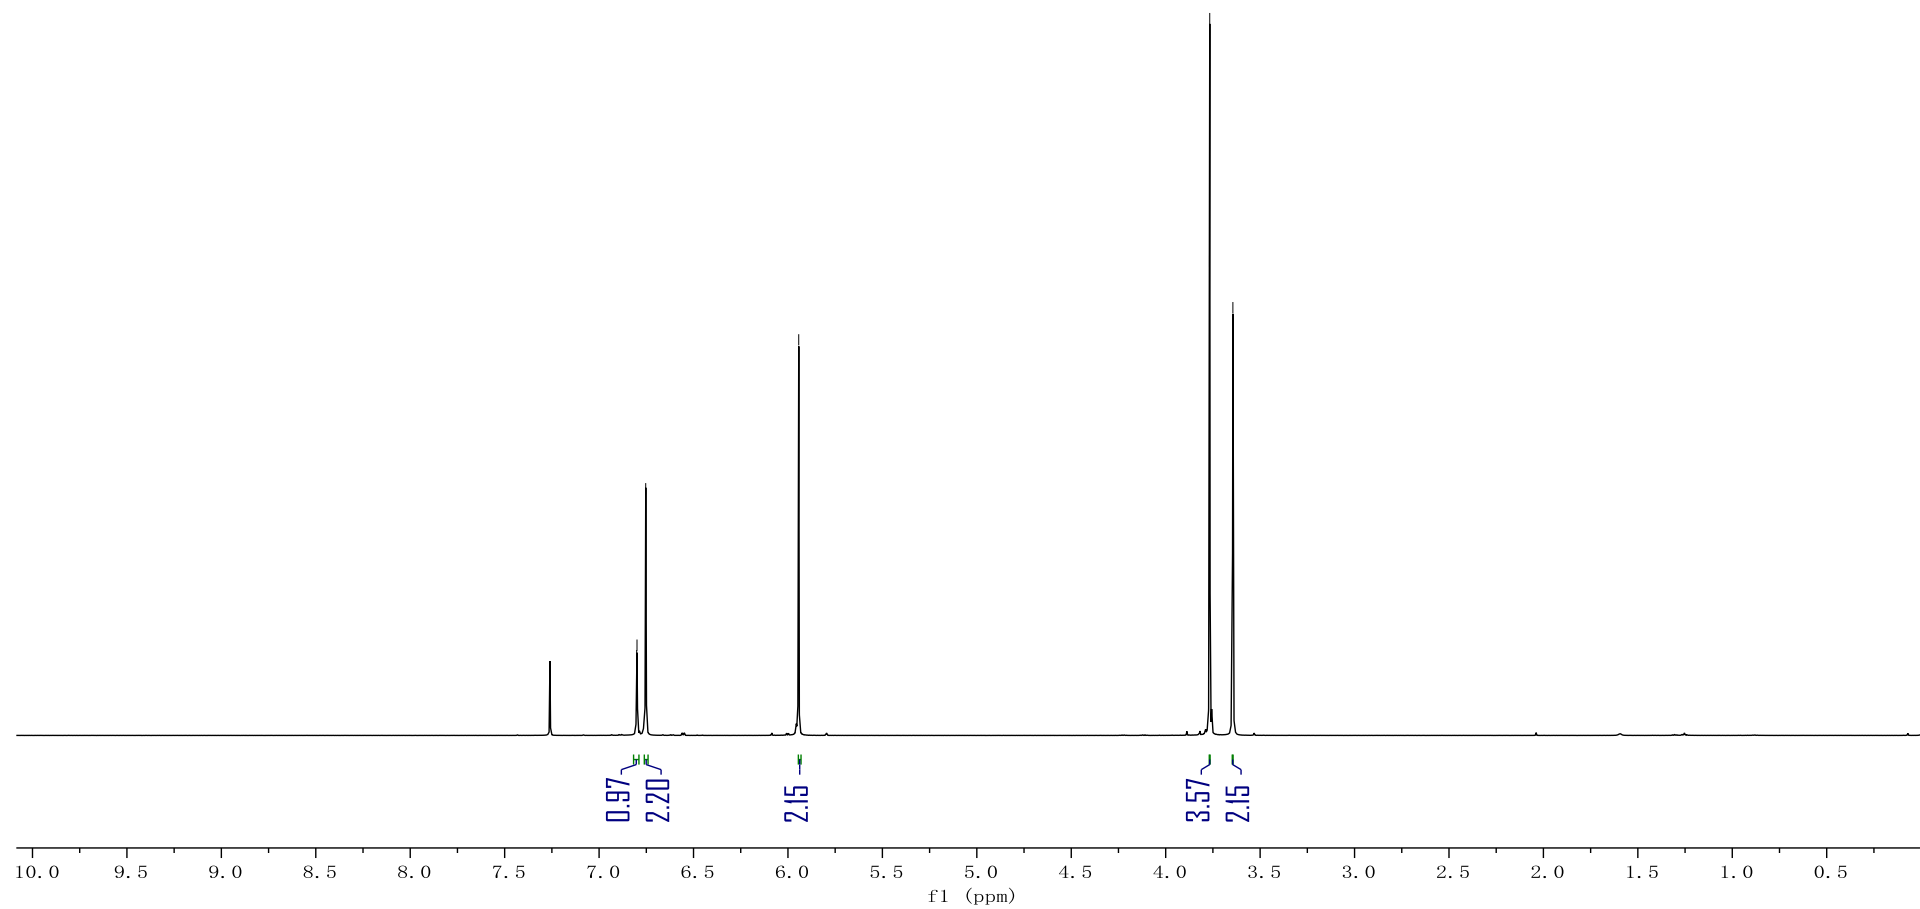



# <sup>13</sup>C NMR

154.030  
147.944  
146.737

127.546  
121.016

108.521  
108.364  
101.101

86.748  
77.212  
77.001  
76.788  
74.408

52.619

24.647

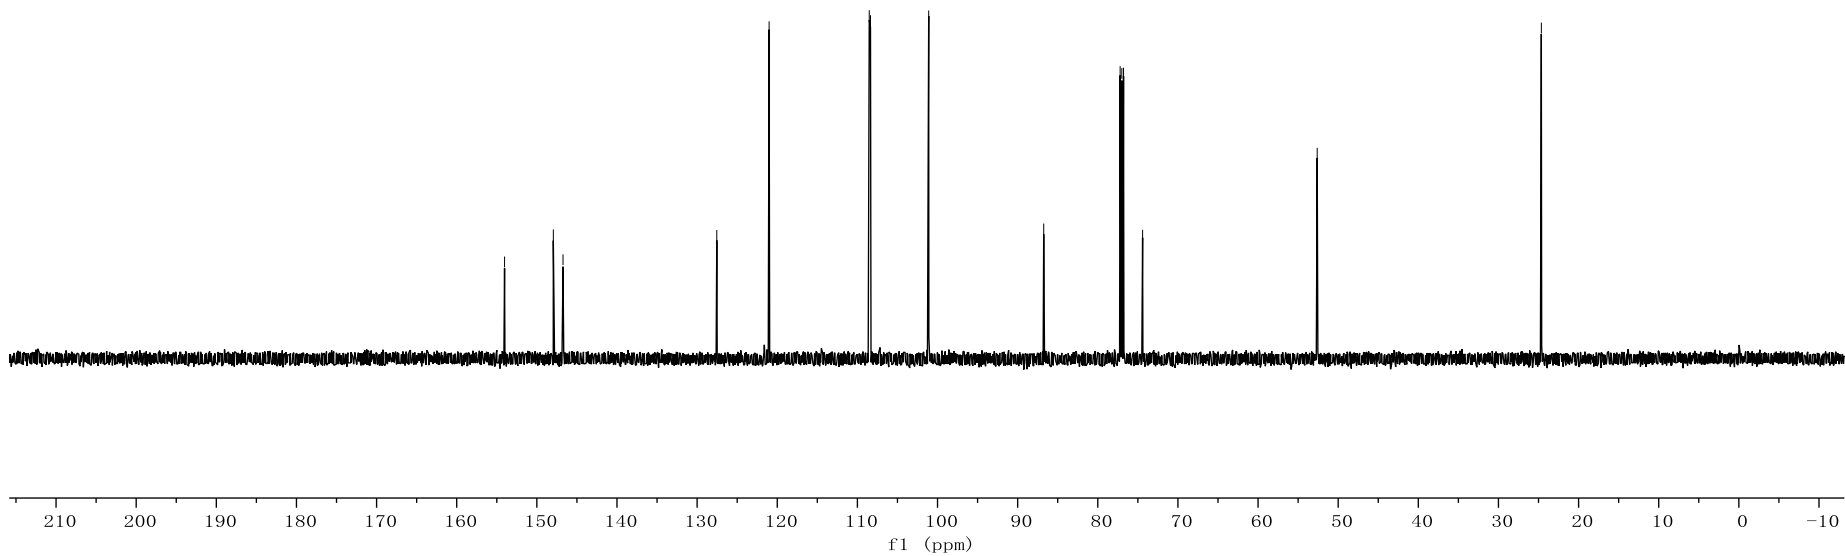

# <sup>1</sup>H NMR

7.961  
7.944  
7.899  
7.882  
7.817  
7.801  
7.593  
7.590  
7.579  
7.576  
7.573  
7.563  
7.560  
7.544  
7.533  
7.530  
7.528  
7.516  
7.514  
7.469  
7.455  
7.452  
7.438

4.129

3.772

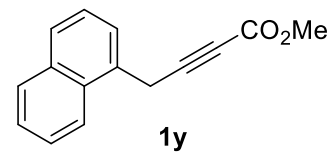

1.00  
0.98  
1.00  
1.99  
1.03  
1.04

2.16

3.22

10.0 9.5 9.0 8.5 8.0 7.5 7.0 6.5 6.0 5.5 5.0 4.5 4.0 3.5 3.0 2.5 2.0 1.5 1.0 0.5 0.0

f1 (ppm)

# <sup>13</sup>C NMR

— 154.079  
133.721  
131.172  
129.814  
128.829  
128.197  
126.533  
126.097  
125.966  
125.532  
122.992

— 86.349  
77.211  
77.000  
76.788  
75.268

— 52.644

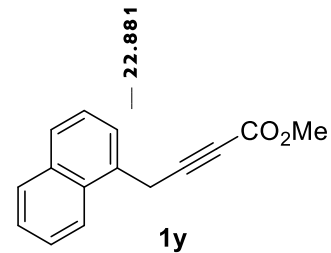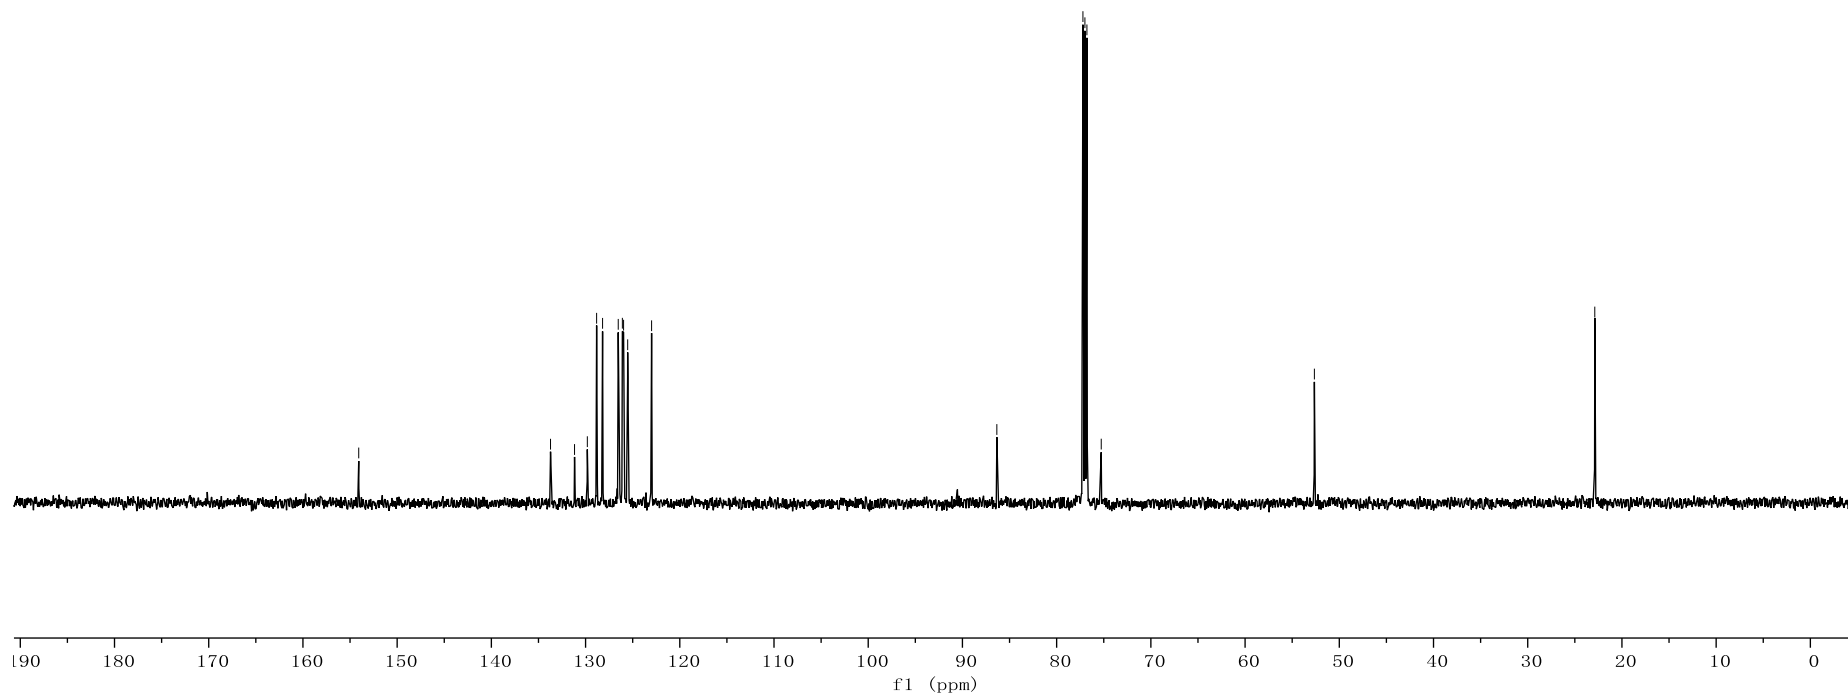

# $^1\text{H}$ NMR

7.187  
7.179  
6.967  
6.965  
6.938  
6.932  
6.930  
6.924

3.885  
3.756

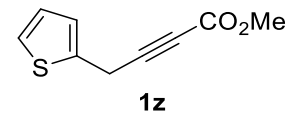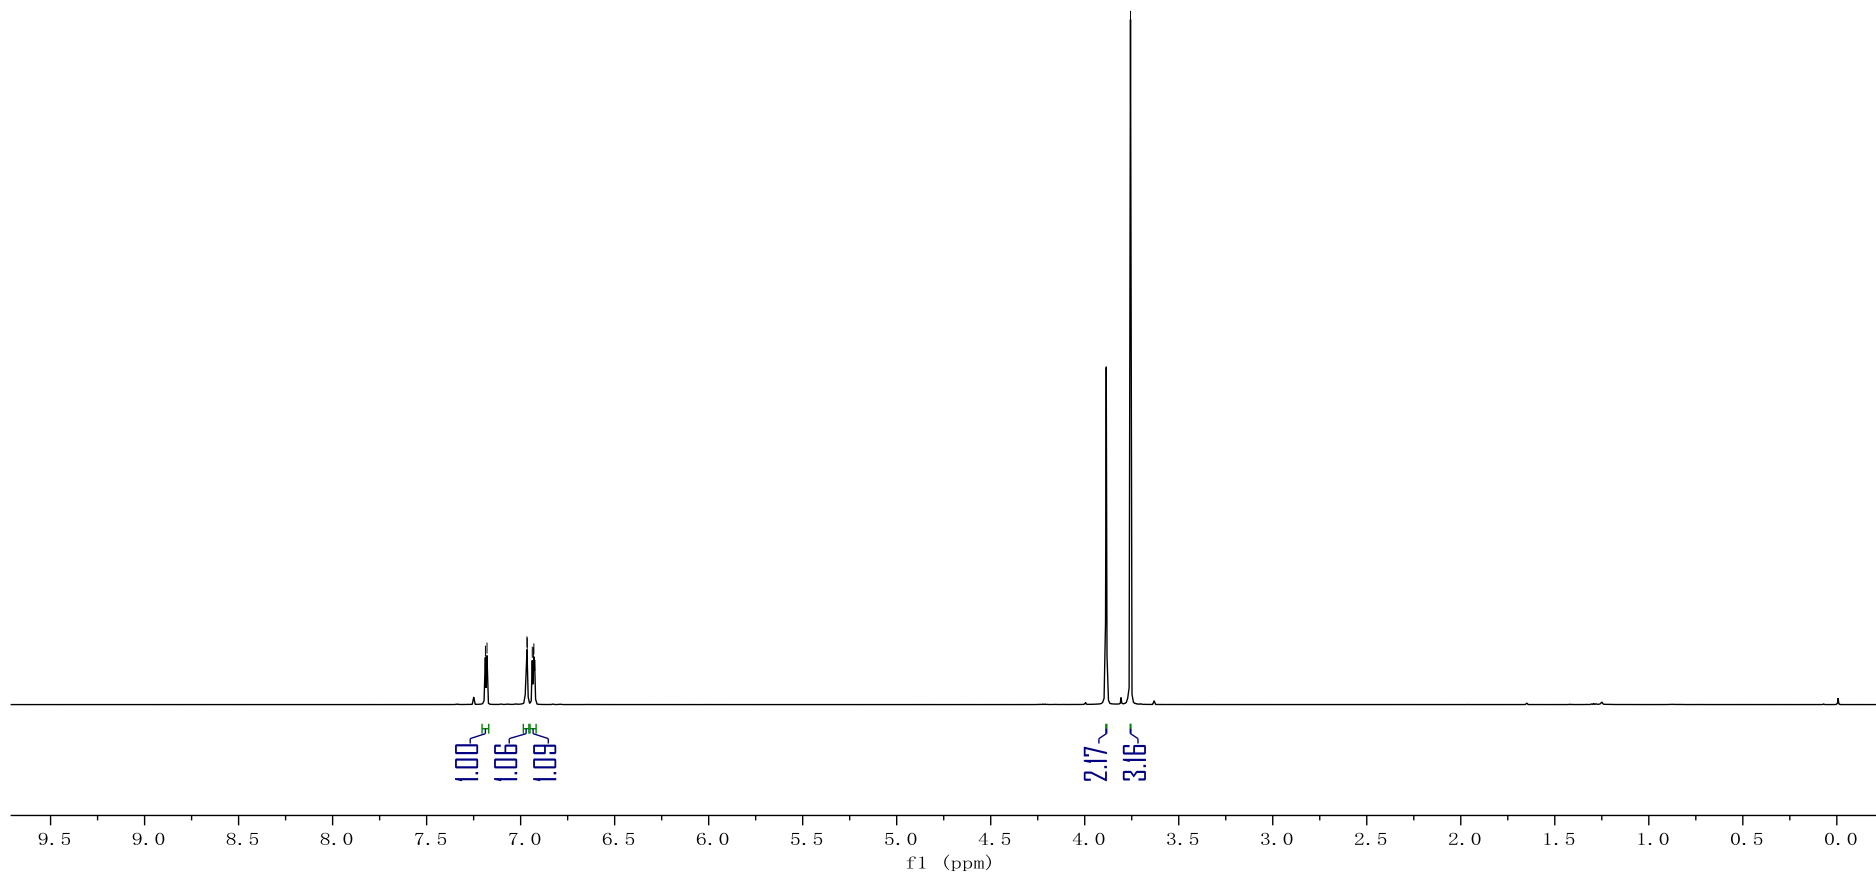

# <sup>13</sup>C NMR

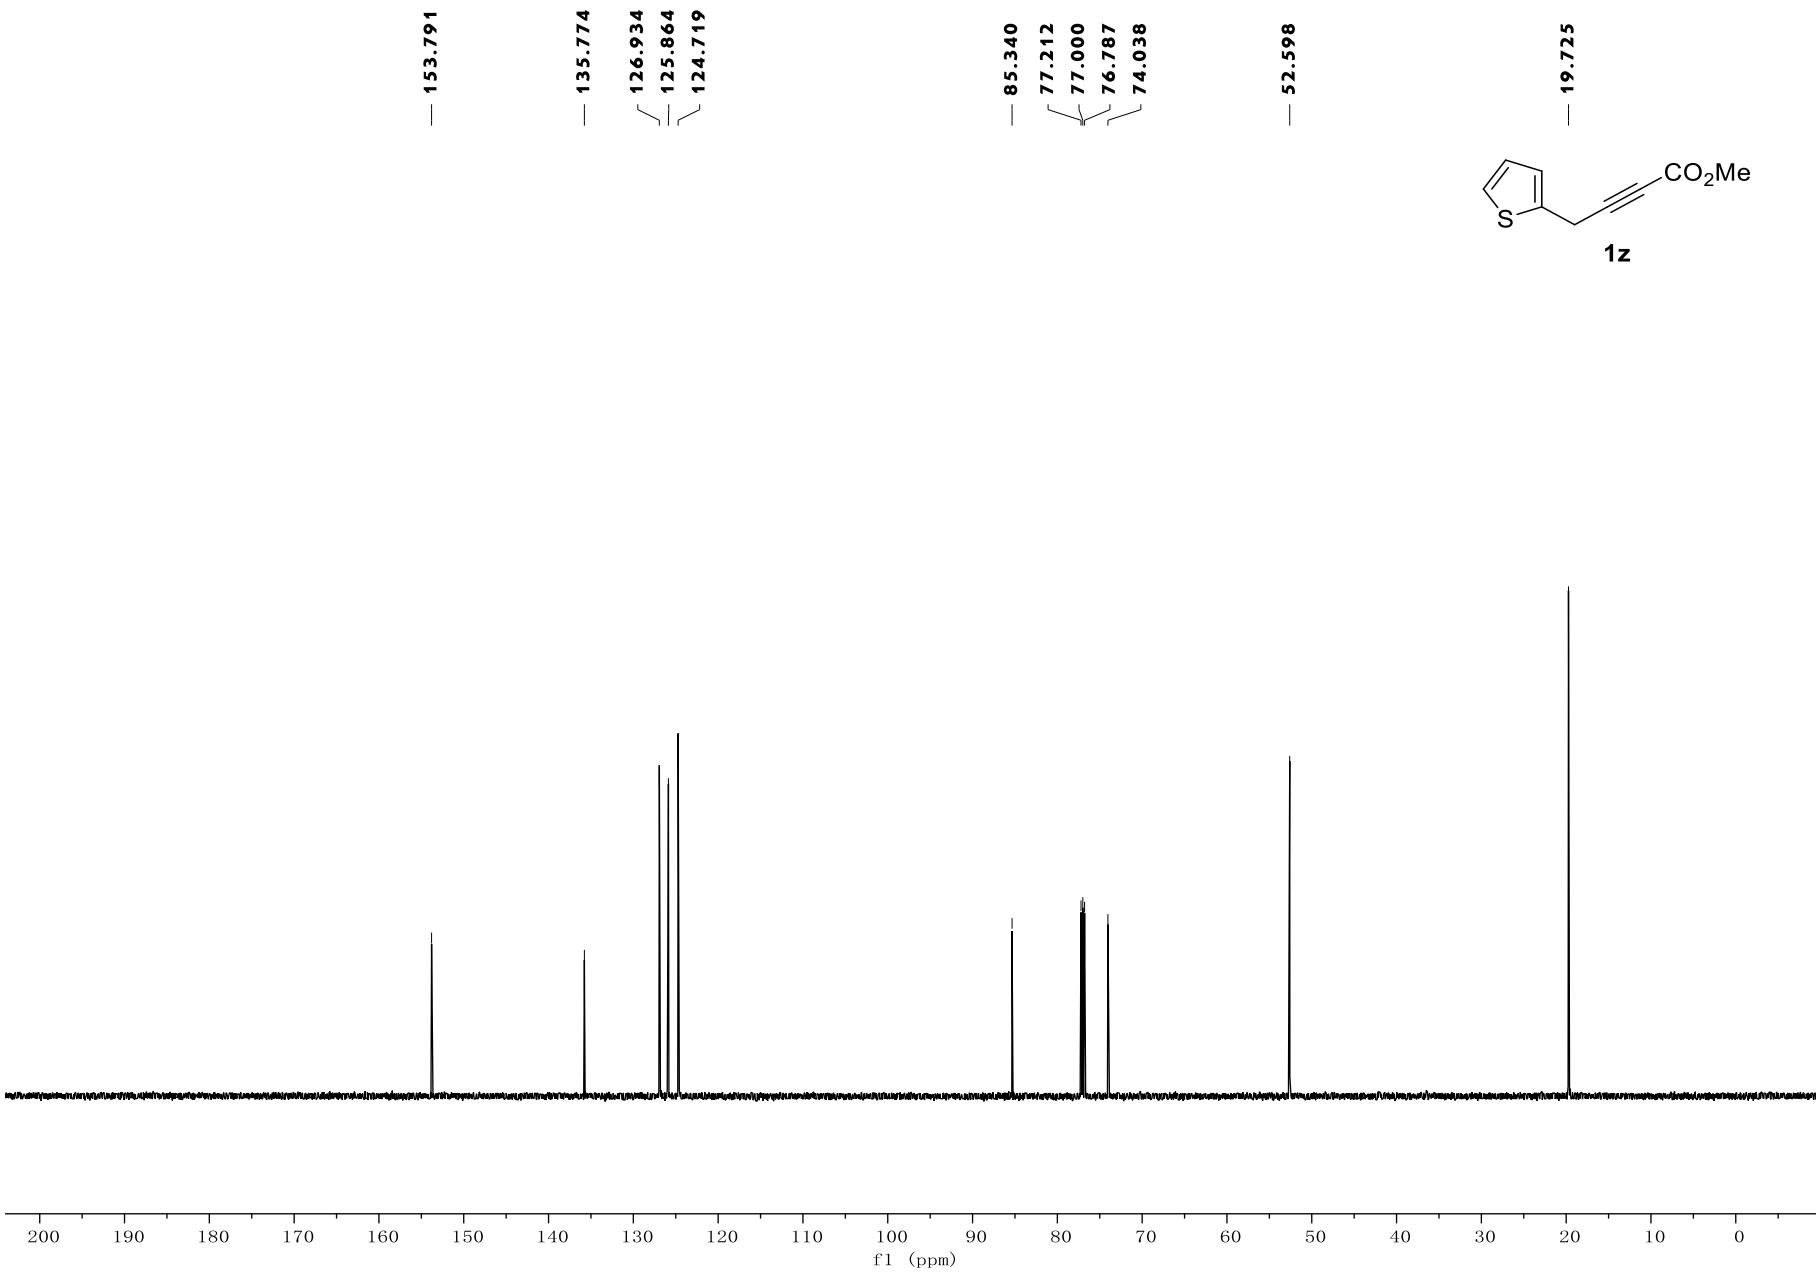

# <sup>1</sup>H NMR

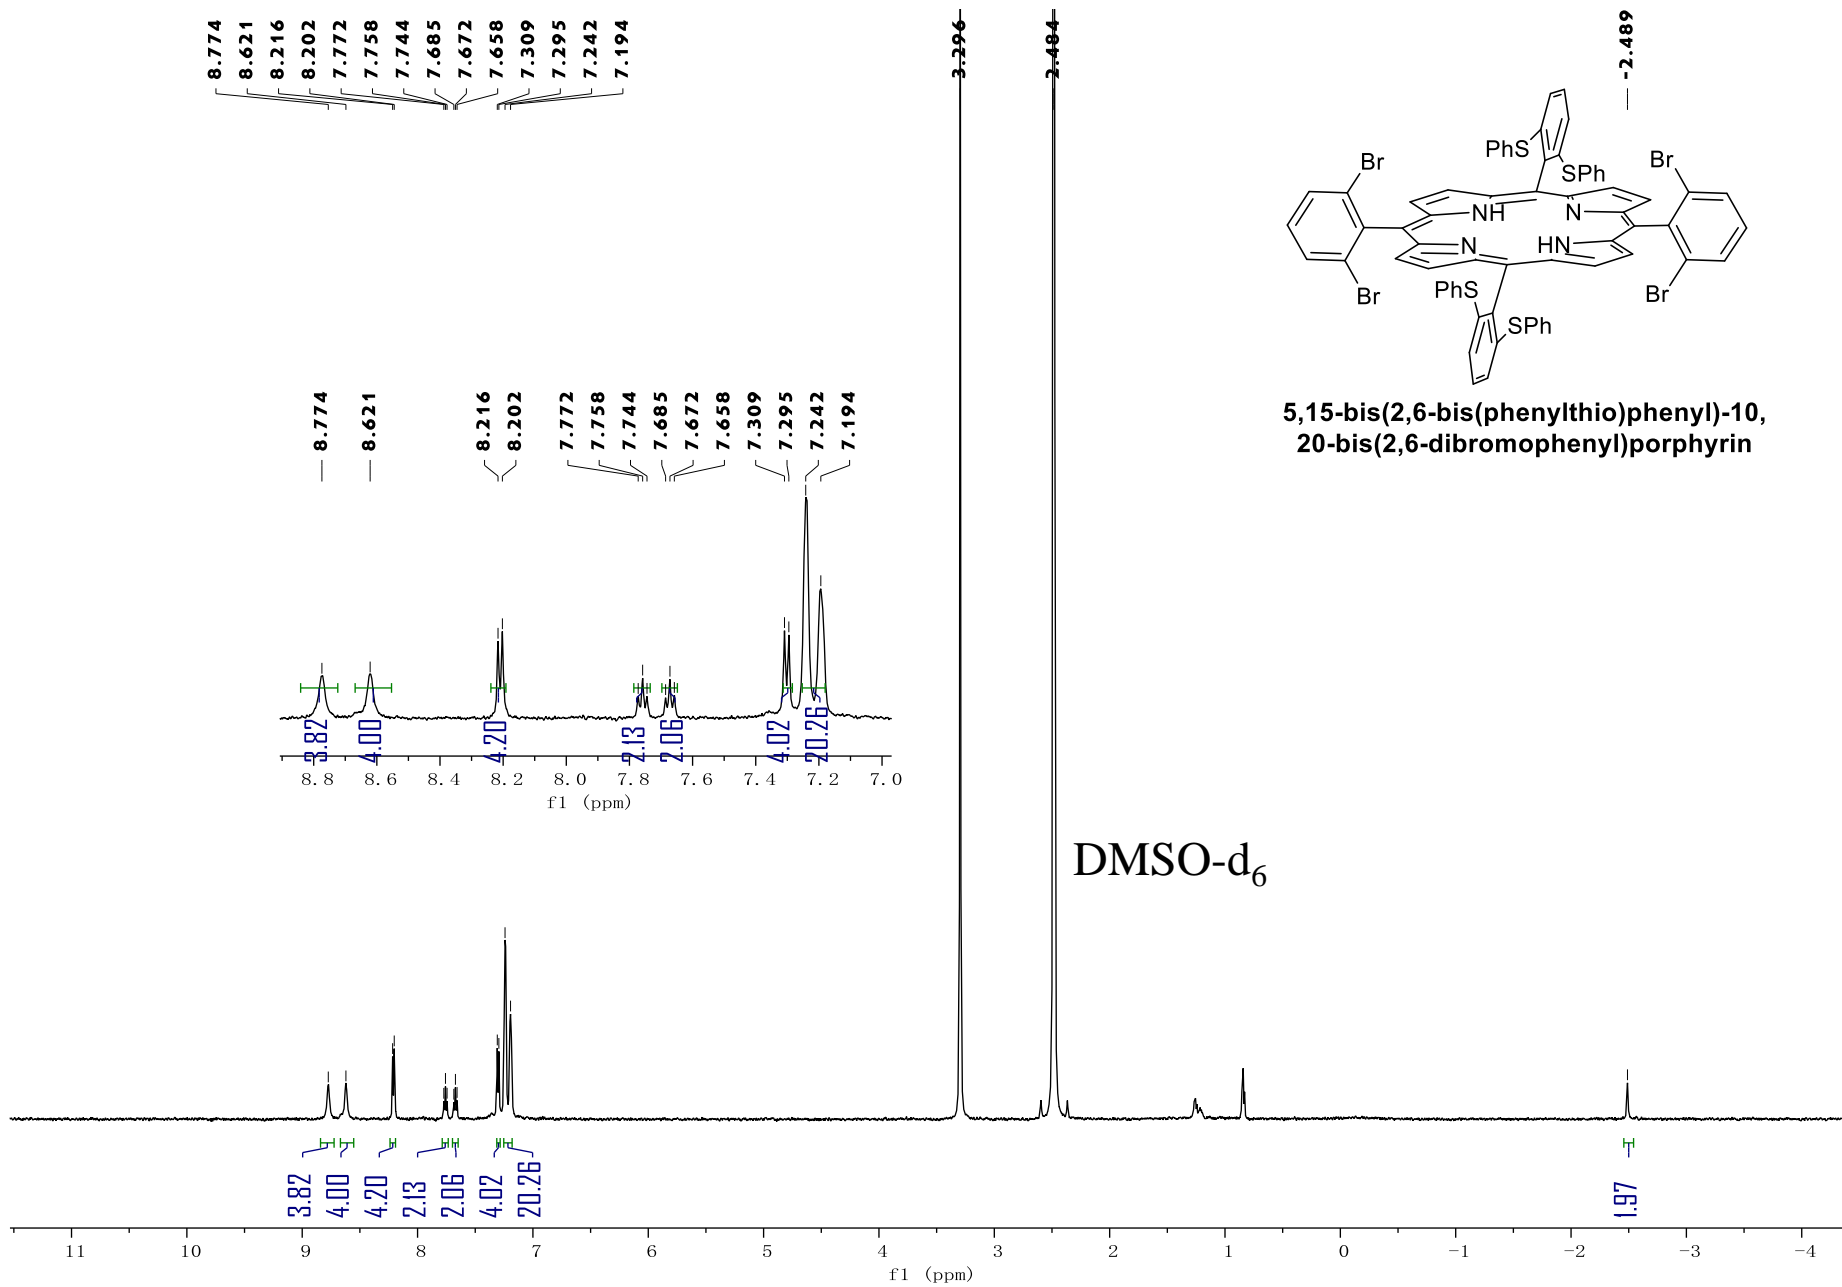

# <sup>1</sup>H NMR

8.960  
8.952  
8.914  
8.512  
7.910  
7.511  
7.498  
7.484  
7.273  
7.268  
7.259  
7.253  
7.248  
7.243  
7.230  
7.218  
7.213  
7.205  
7.199  
7.183  
6.833  
6.330  
6.137  
6.012

1.119  
0.718  
0.539  
0.359

-2.061

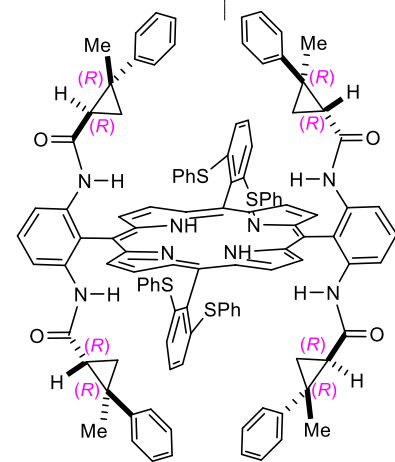

[H<sub>2</sub>(P6)]

low solubility in CDCl<sub>3</sub>

8.00  
4.01  
2.13  
2.29  
24.05  
4.34  
4.10  
8.16  
8.16

12.13  
4.28  
4.01  
4.01

2.48

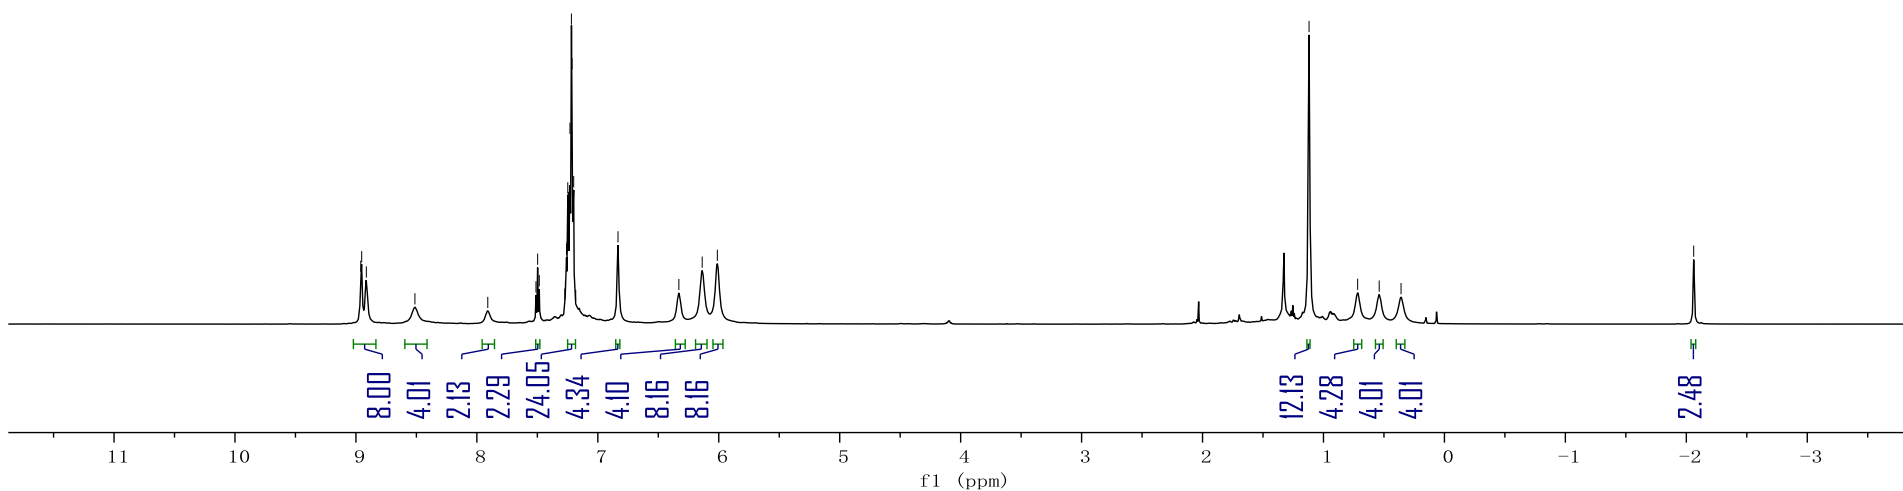

# <sup>13</sup>C NMR

168.744  
144.361  
143.085  
138.878  
137.202  
133.536  
133.467  
130.209  
129.882  
129.282  
128.309  
127.306  
125.669  
125.138  
121.717  
118.262  
117.064  
108.189

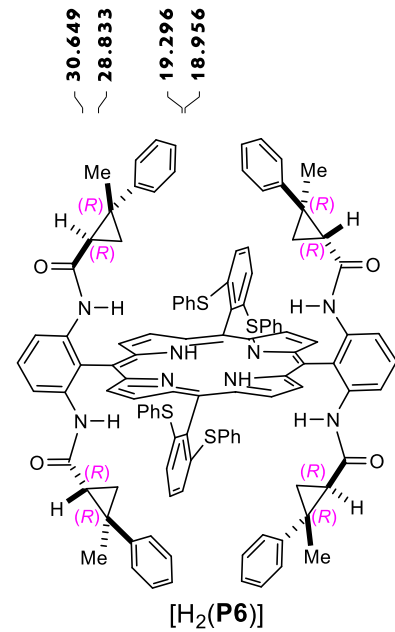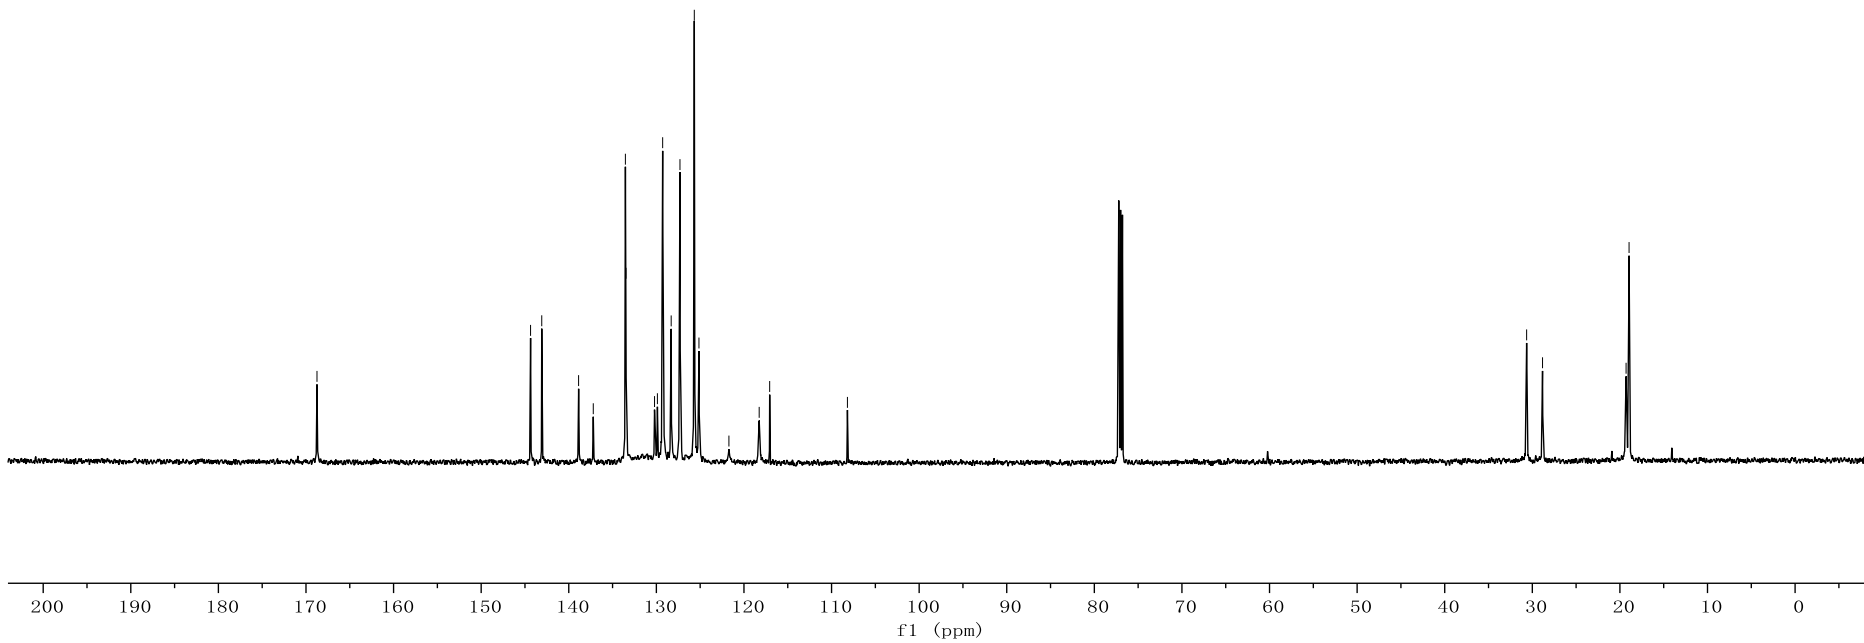



# <sup>1</sup>H NMR

7.293  
7.279  
6.890  
6.877

5.435  
5.417  
5.402  
4.290  
4.278  
4.272  
4.267  
4.262  
4.256  
4.256  
4.249  
4.238  
4.185  
4.173  
4.162  
4.156  
4.155  
4.150  
4.144  
4.143  
4.132  
3.797

1.228  
1.216  
1.204

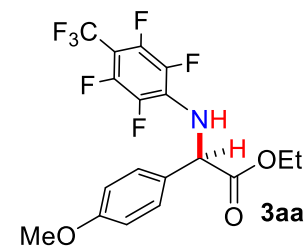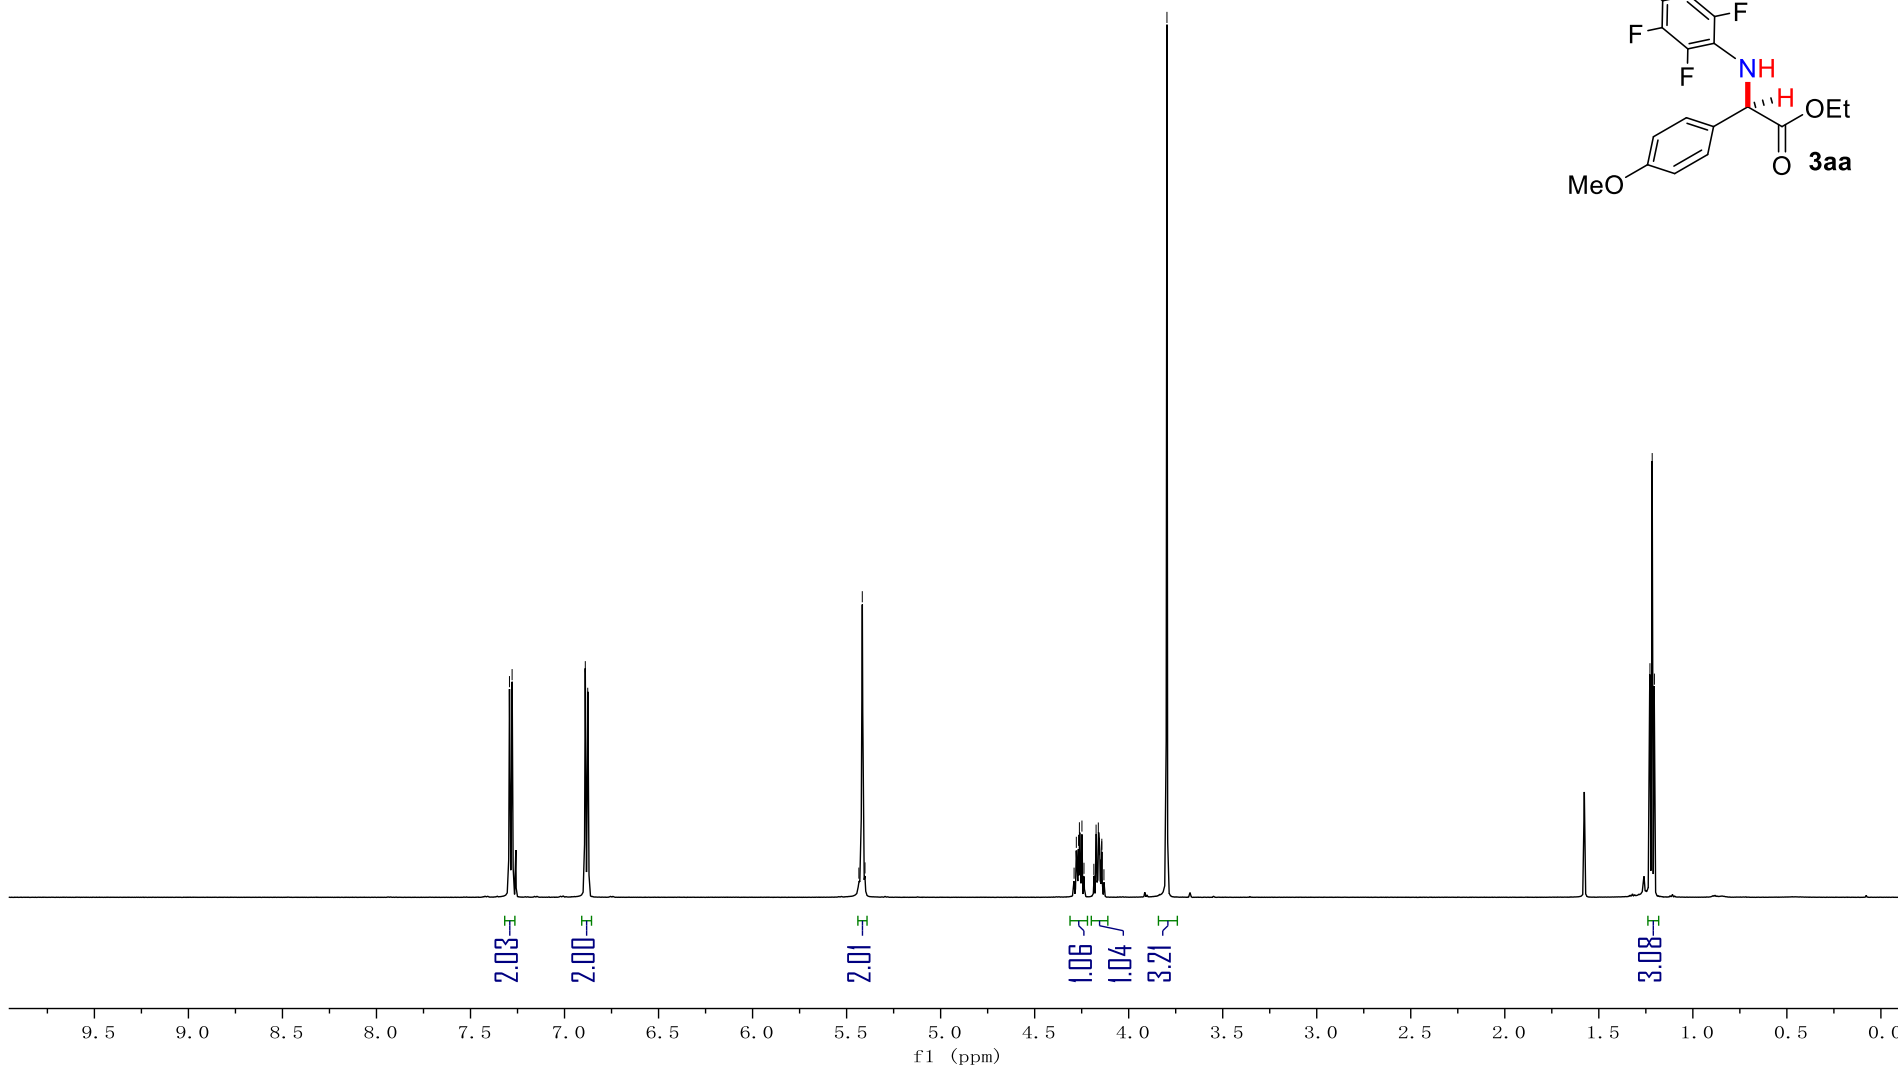

# <sup>13</sup>C NMR

- 171.030
- 159.998
- 145.686
- 145.613
- 143.944
- 143.914
- 137.780
- 137.675
- 136.178
- 136.072
- 129.320
- 129.251
- 129.173
- 128.647
- 128.153
- 124.154
- 122.340
- 120.532
- 118.728
- 114.497
- 97.789
- 97.520
- 97.379
- 97.203
- 97.059
- 62.303
- 60.088
- 60.060
- 60.033
- 55.268
- 55.247
- 13.941

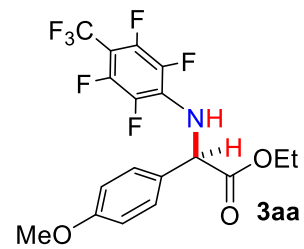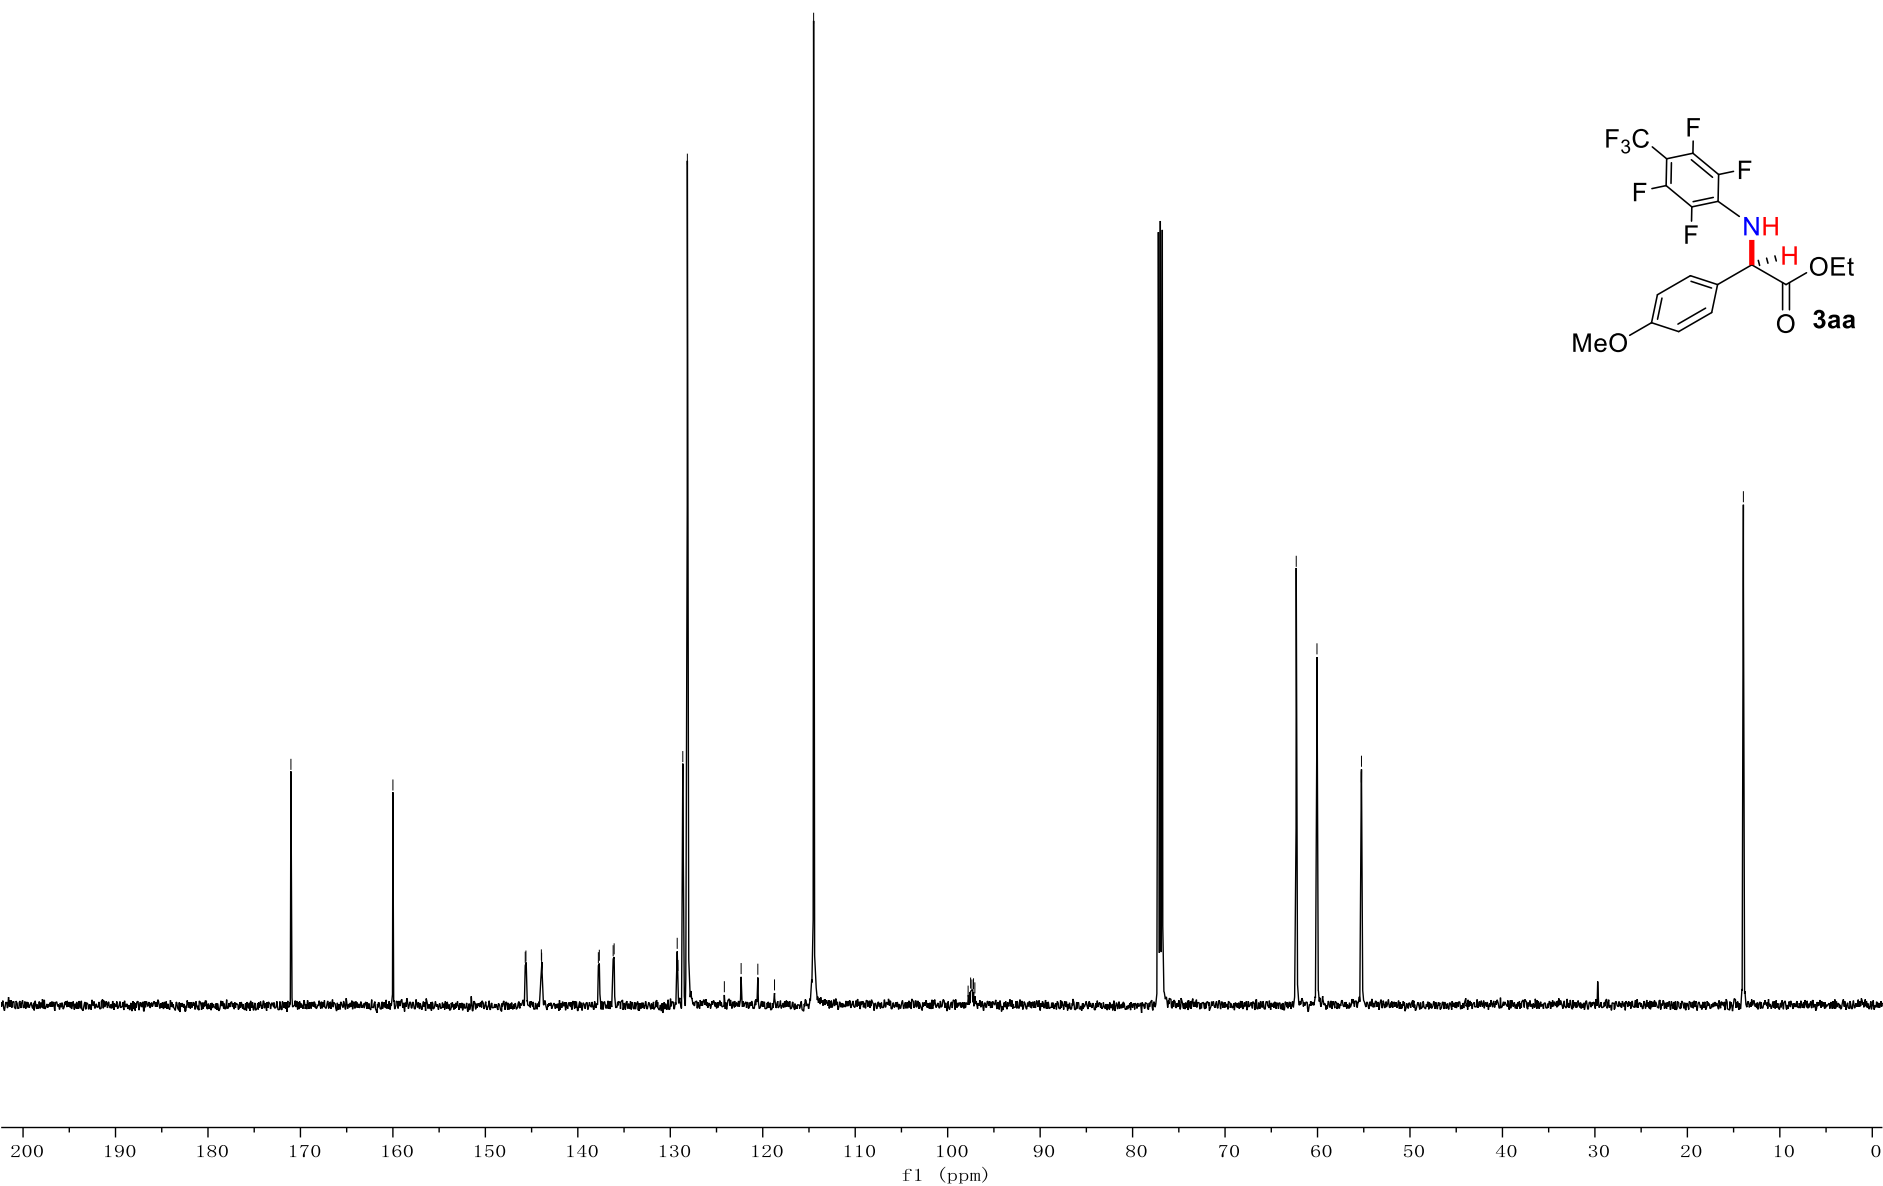

# <sup>19</sup>F NMR

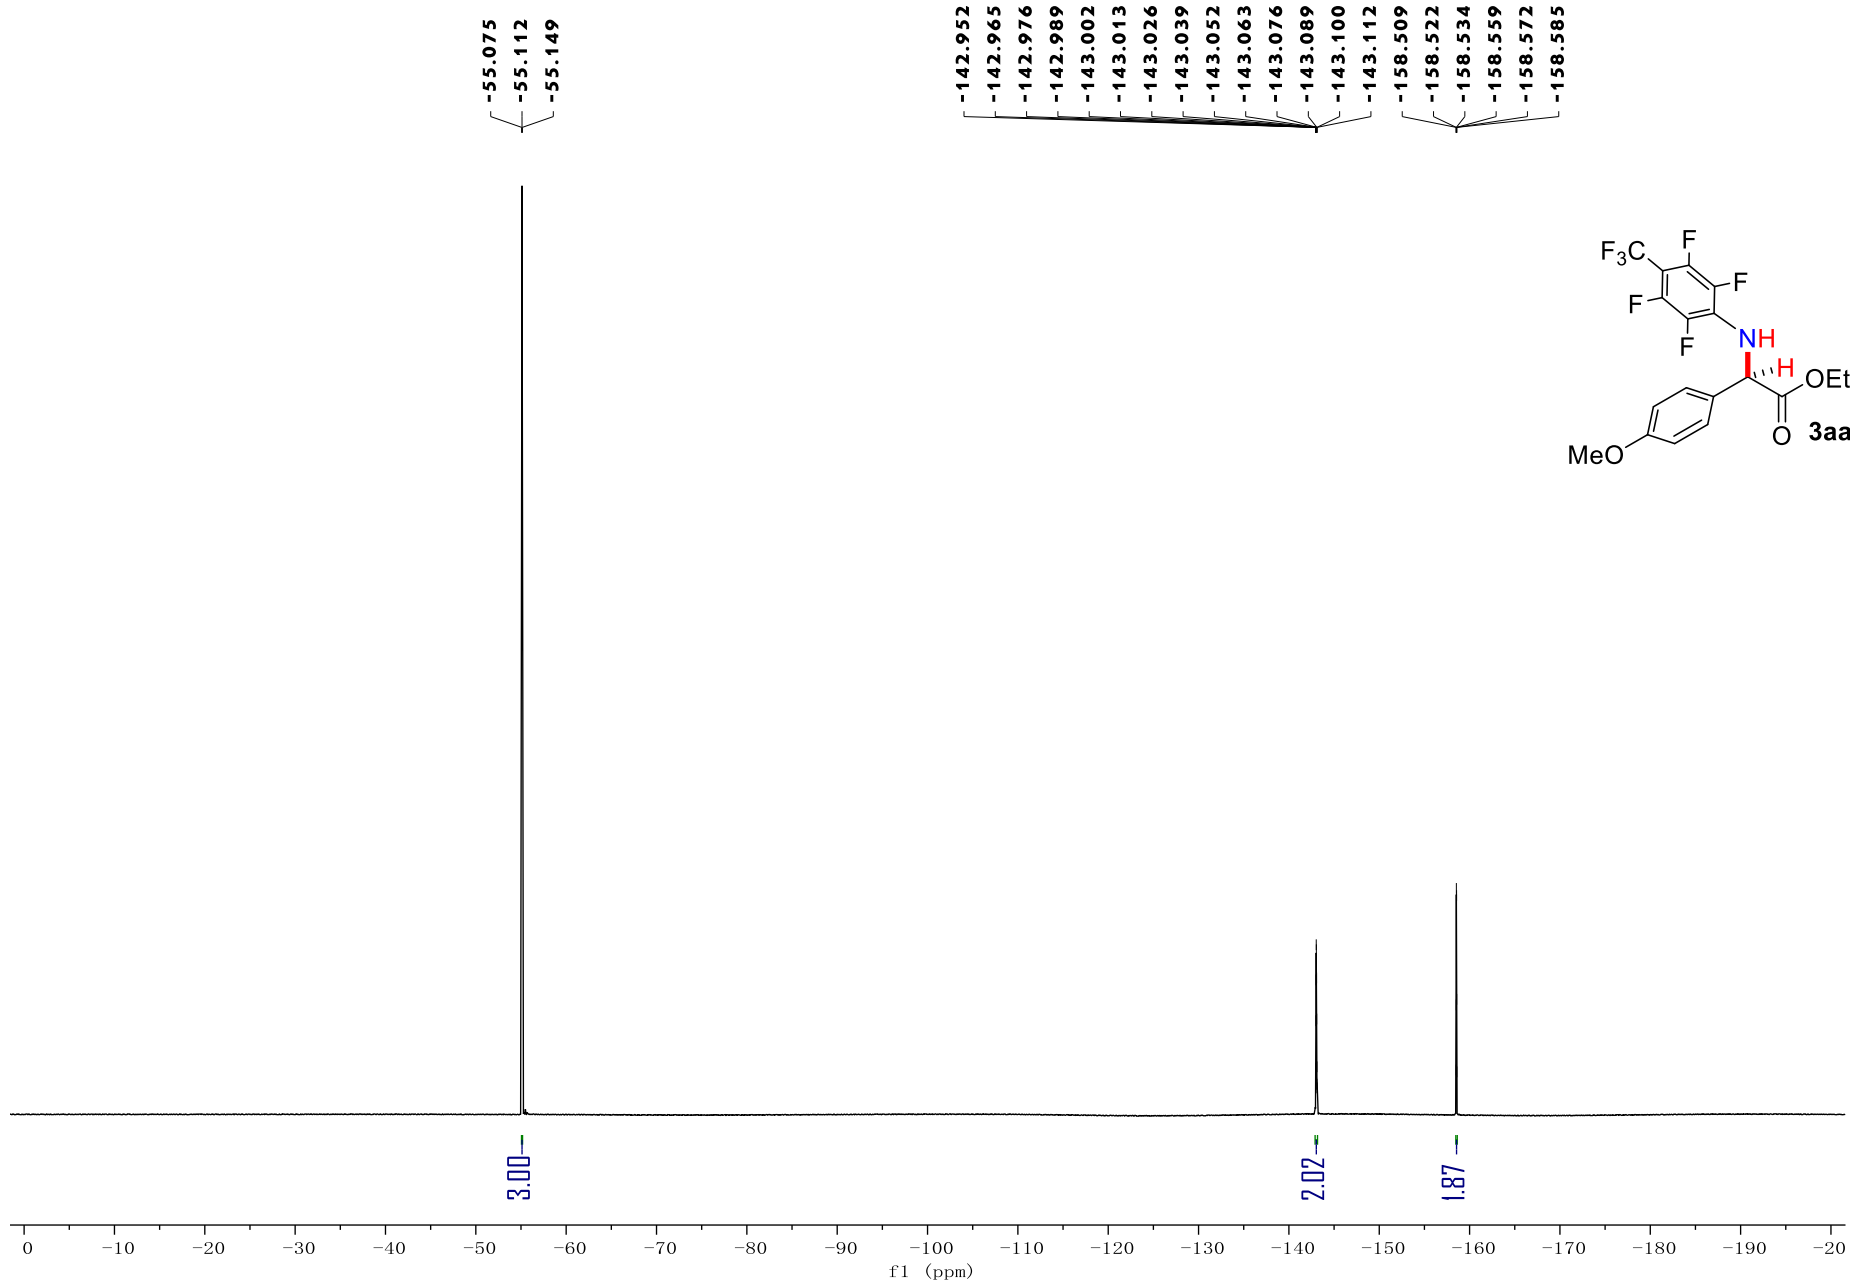

# HPLC

JLM-II-198-2pure-WHELK-0.5@-1mL

C:\EZStart\Projects\Default\Method\yang-ODH 20%0.7ml premix.met

C:\EZStart\Projects\Default\Data\JLM-II-198-2pure-WHELK0.5@1ml

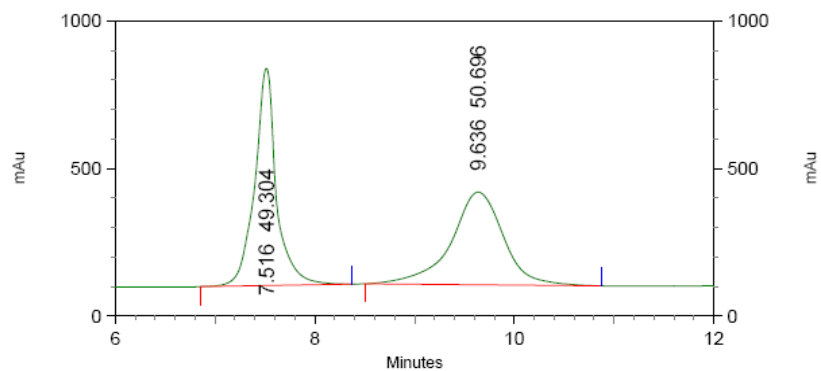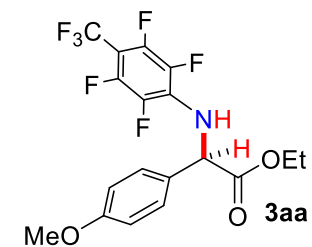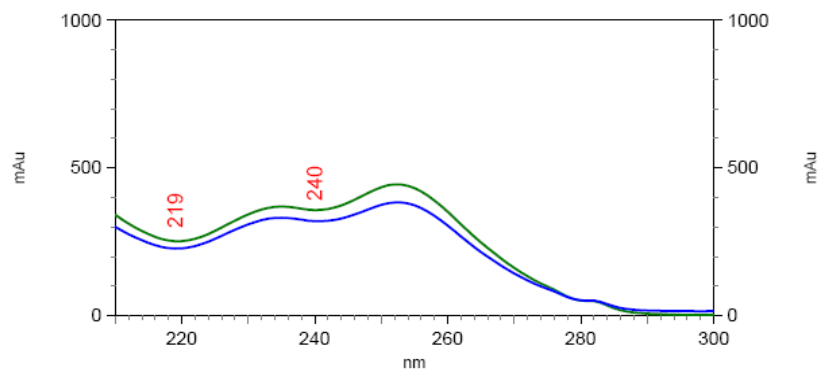

10: 259 nm, 4 nm

Results

| Pk #   | Name | Retention Time | Area Percent |
|--------|------|----------------|--------------|
| 1      |      | 7.516          | 49.304       |
| 2      |      | 9.636          | 50.696       |
| Totals |      |                | 100.000      |

# HPLC

JLM-V-122-3a1-WHELK-0.5@-1mL

C:\EZStart\Projects\Default\Method\yang-ODH 20%0.7ml premix.met

C:\EZStart\Projects\Default\Data\JLM-V-122-3a1-WHELK0.5@1ml

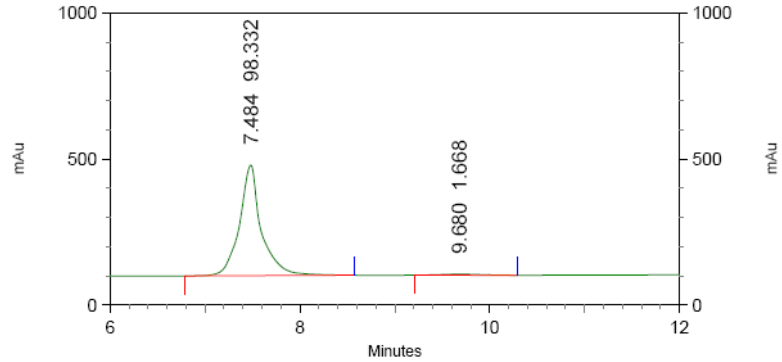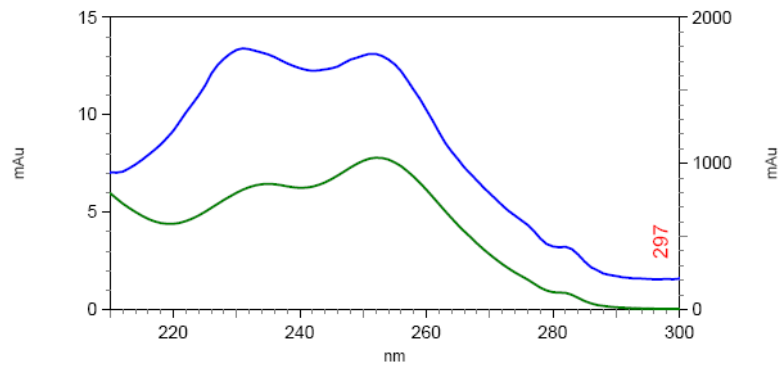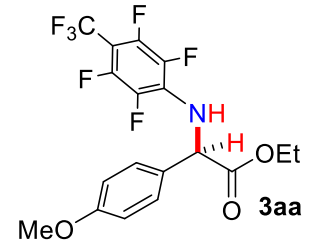

15: 270 nm, 4 nm

Results

| Pk #   | Name | Retention Time | Area Percent |
|--------|------|----------------|--------------|
| 1      |      | 7.484          | 98.332       |
| 2      |      | 9.680          | 1.668        |
| Totals |      |                | 100.000      |

# $^1\text{H}$ NMR

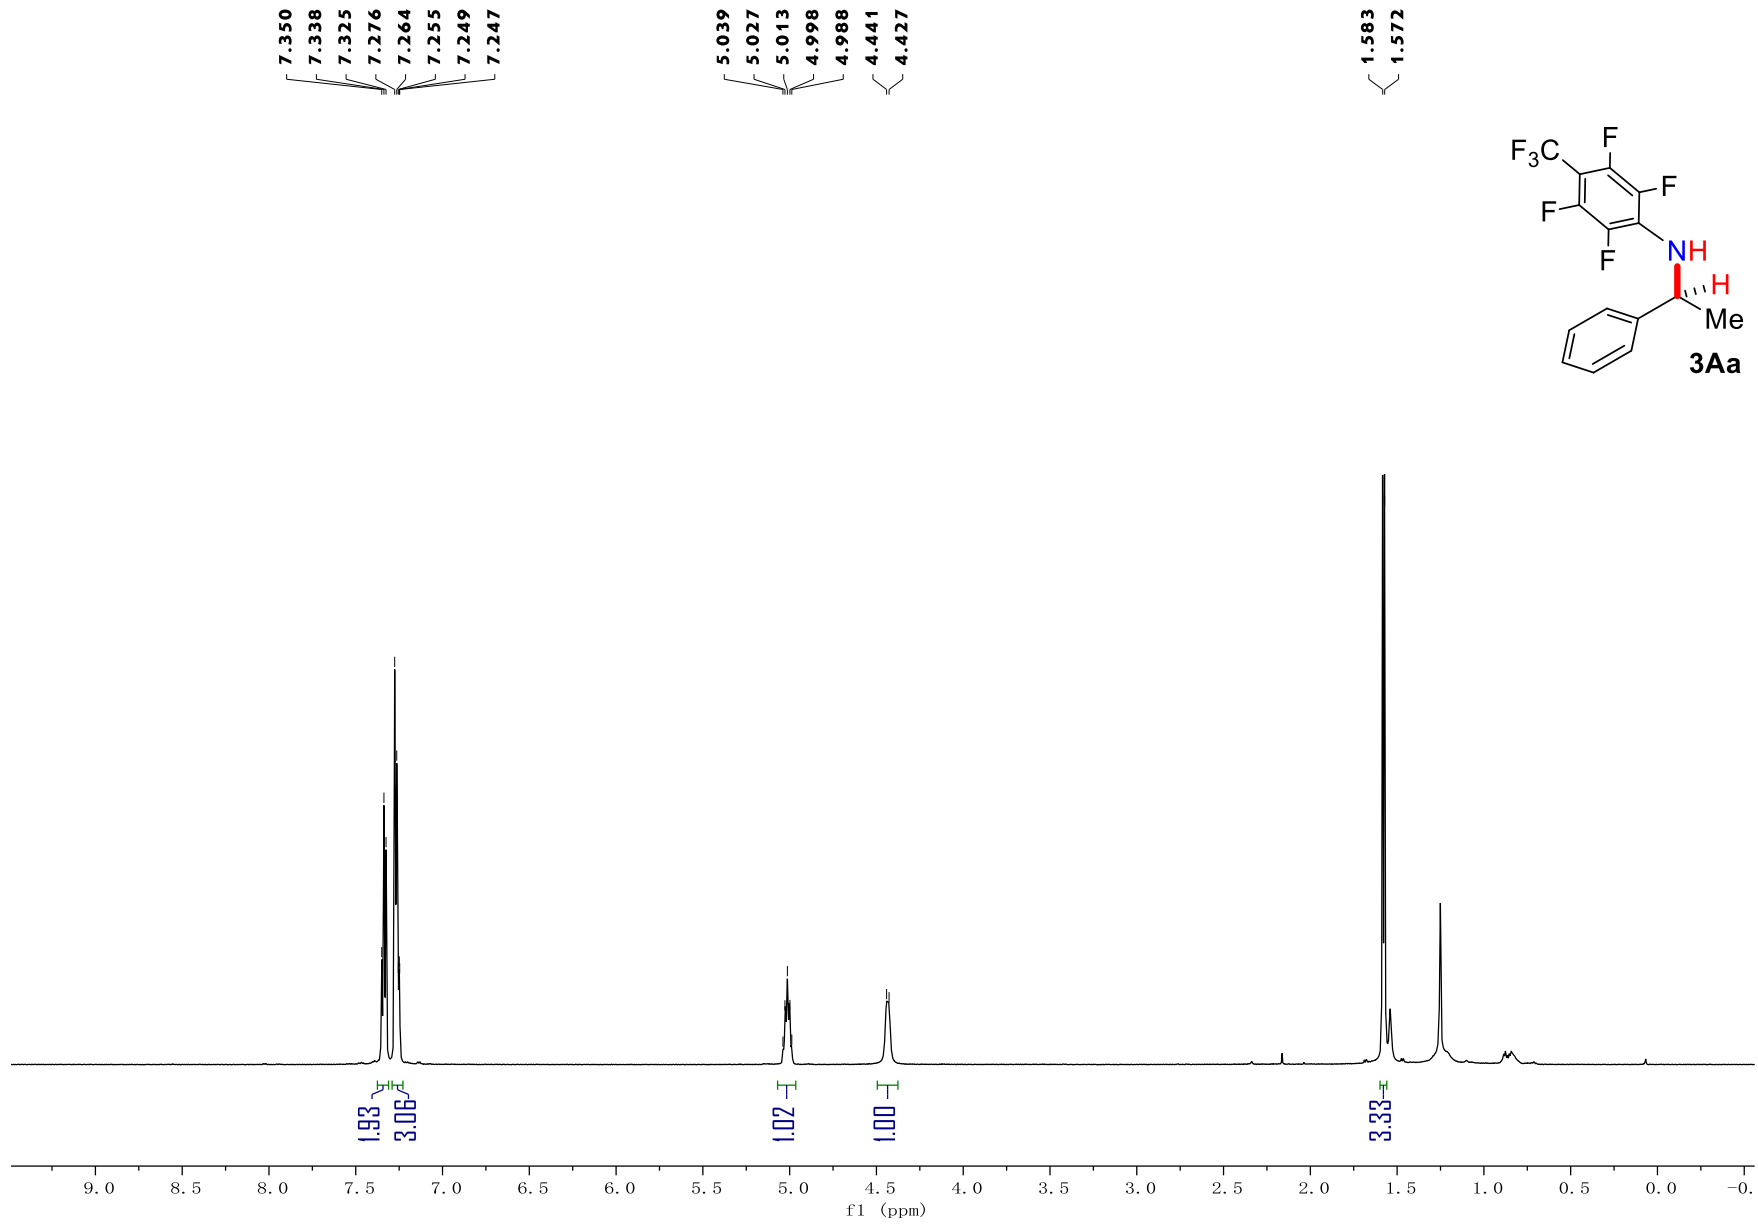

# <sup>13</sup>C NMR

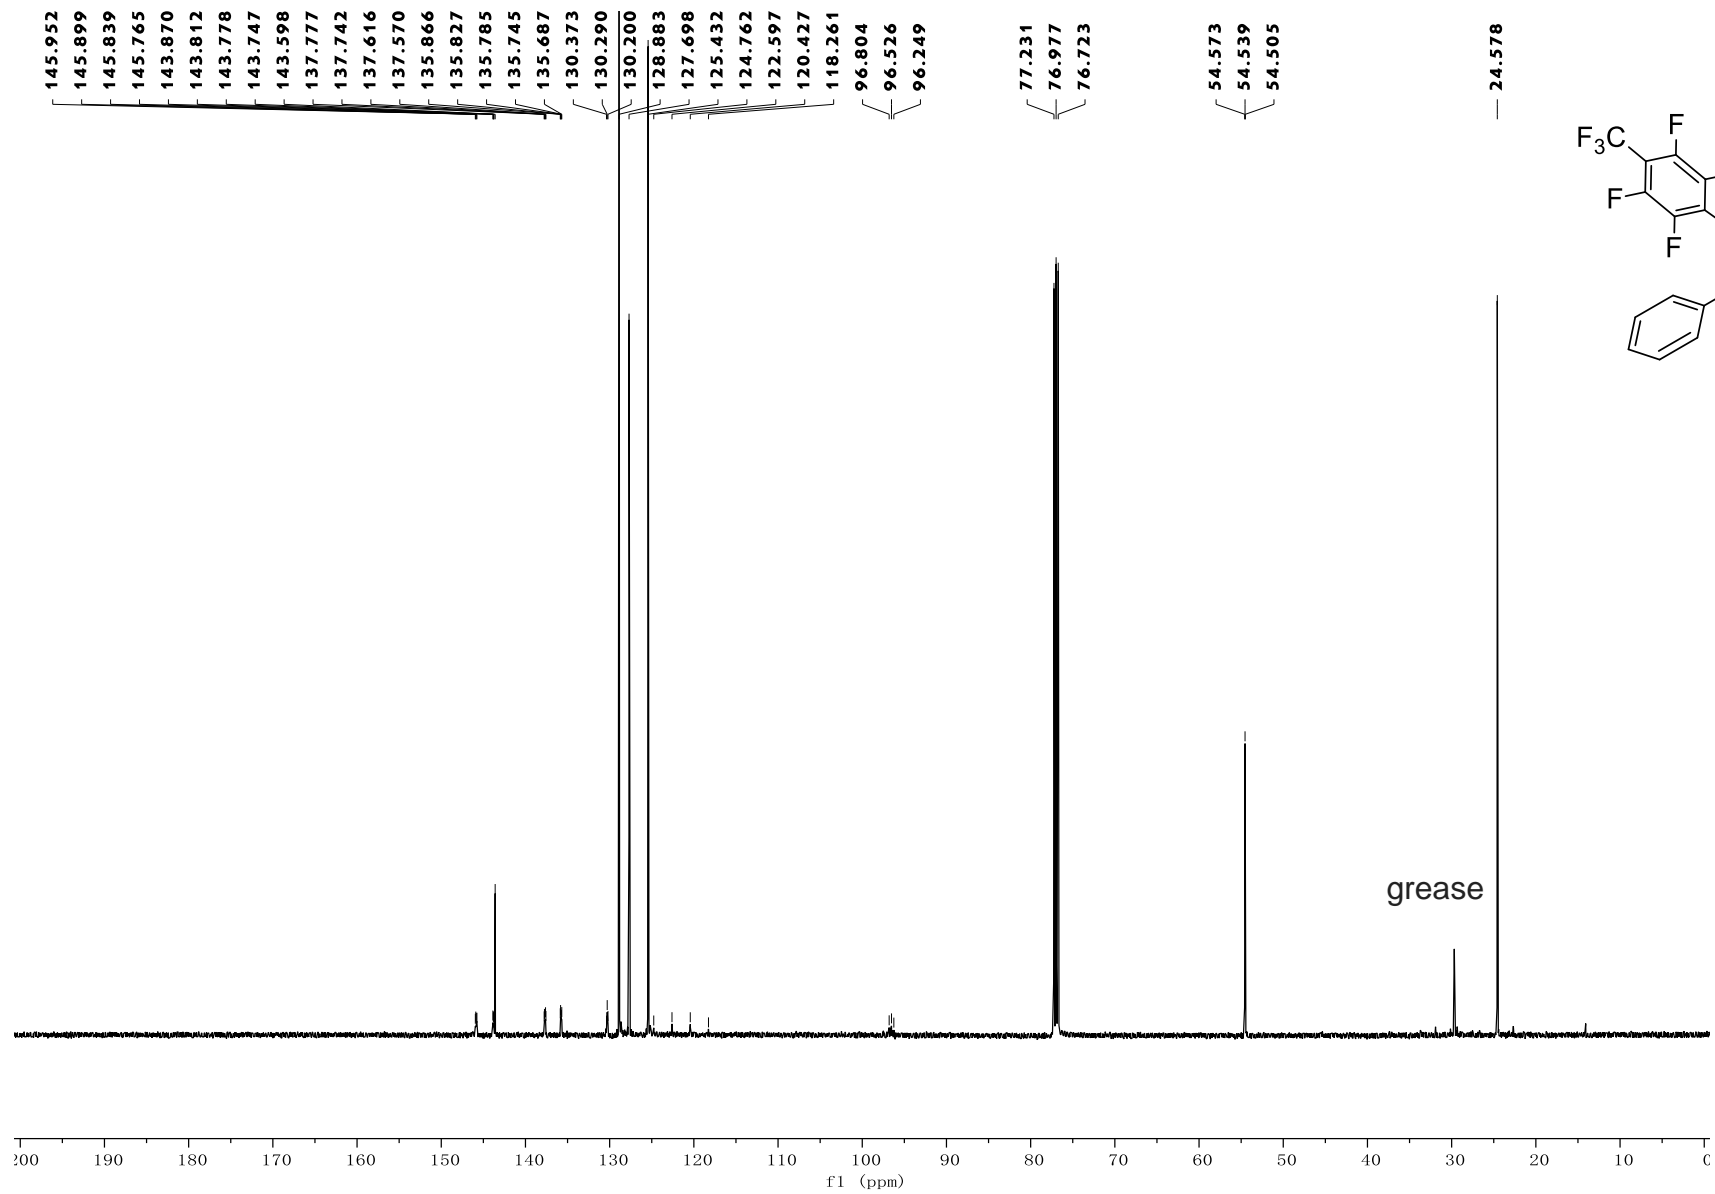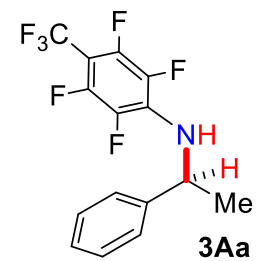

# $^{19}\text{F}$ NMR

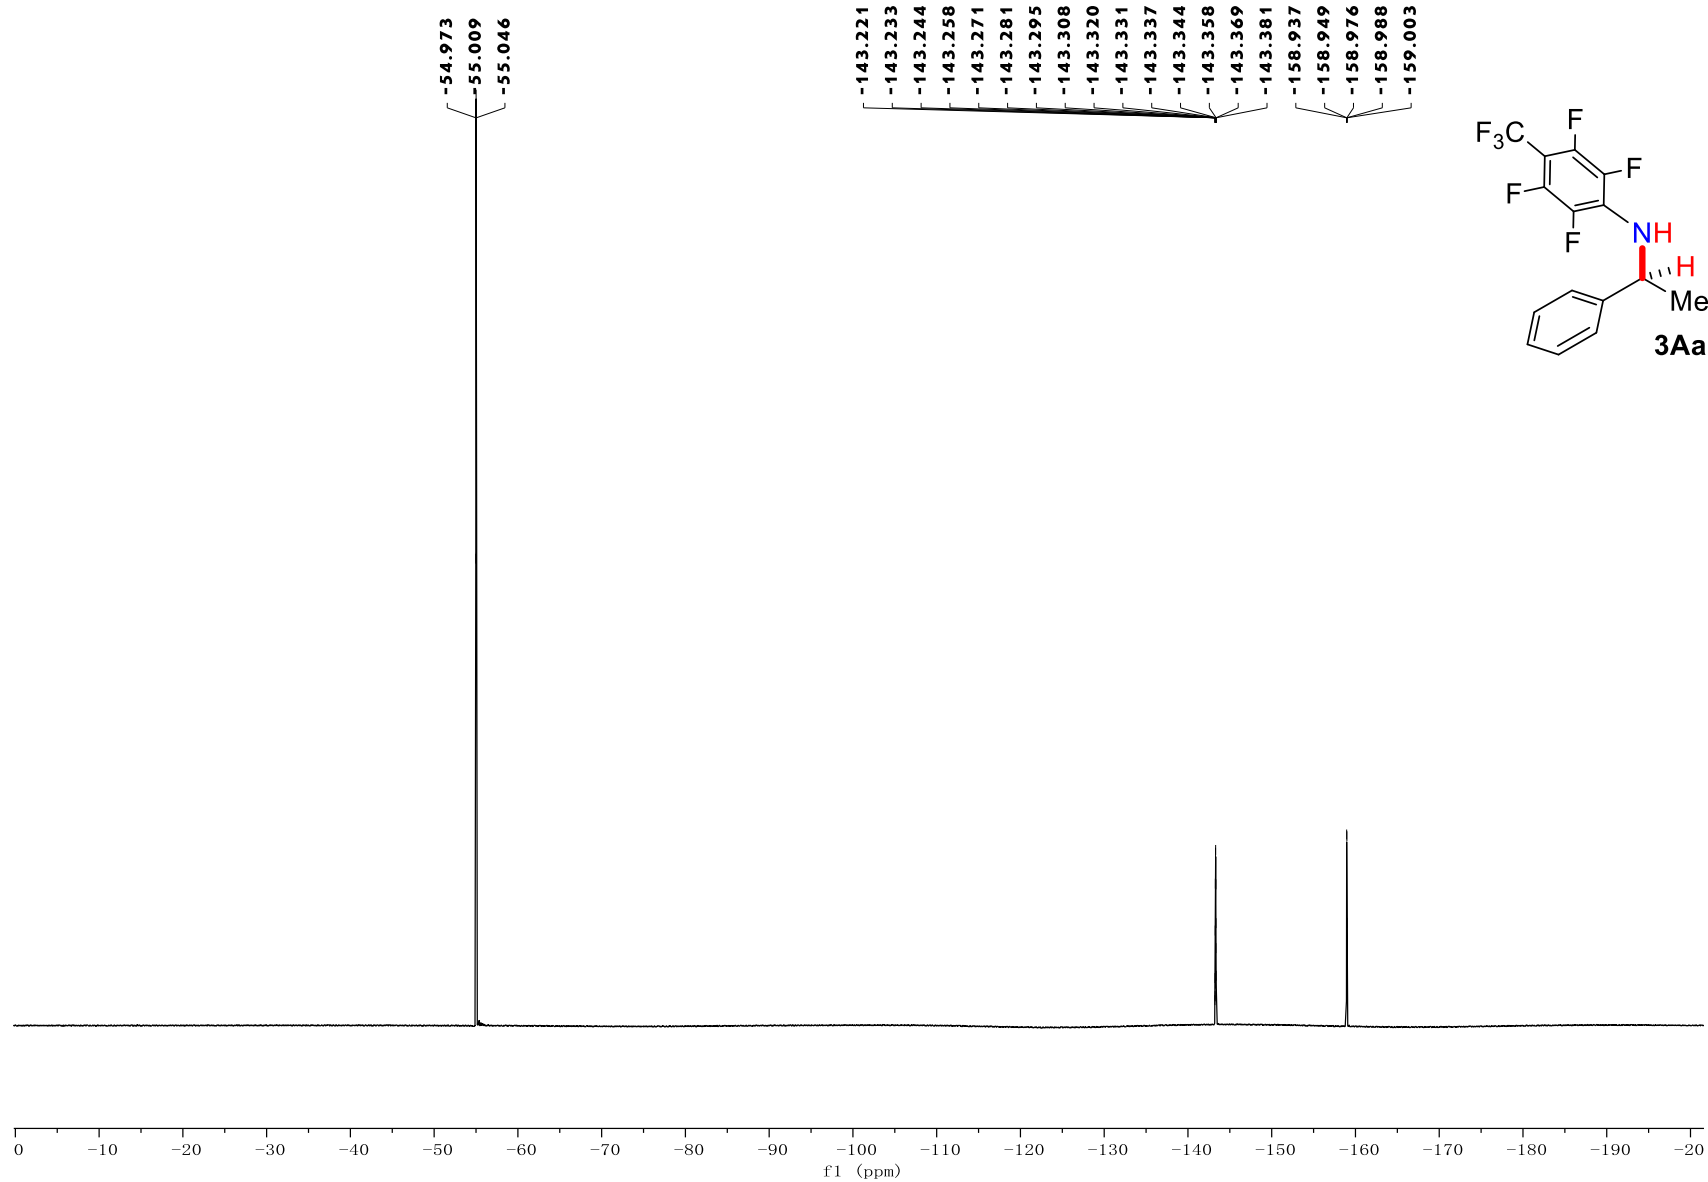



# HPLC

C:\EZStart\Projects\Default\Data\POX-1937-24-IA-0.8ml-PURE-1  
C:\Documents and Settings\zhang\Desktop\DSW\Report-standard0311.met

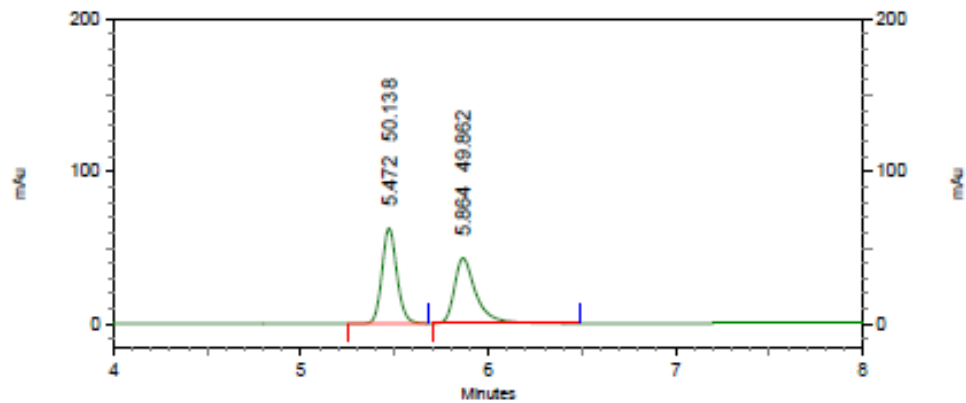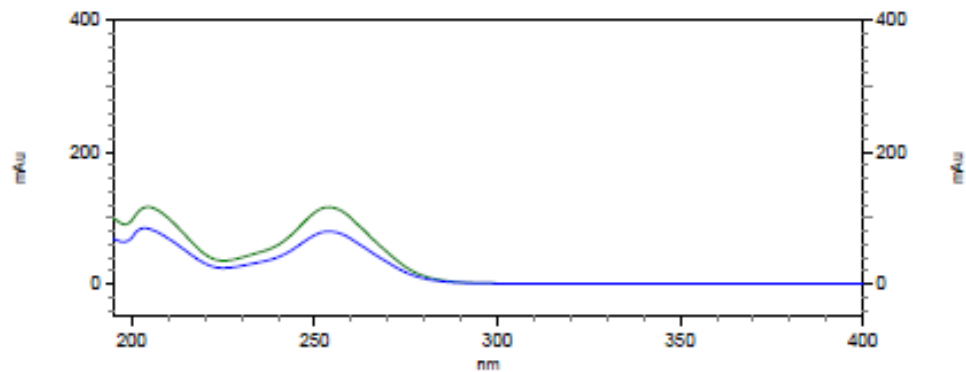

4: 267 nm, 4  
nm Results

| Pk # | Retention Time | Area Percent |
|------|----------------|--------------|
| 1    | 5.472          | 50.138       |
| 2    | 5.864          | 49.862       |

|        |         |
|--------|---------|
| Totals | 100.000 |
|--------|---------|

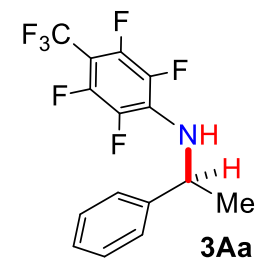

# HPLC

C:\EZStart\Projects\Default\Data\POX-1938-2%-IA-0.8ml  
C:\Documents and Settings\zhang\Desktop\DSW\Report-standard0311.met

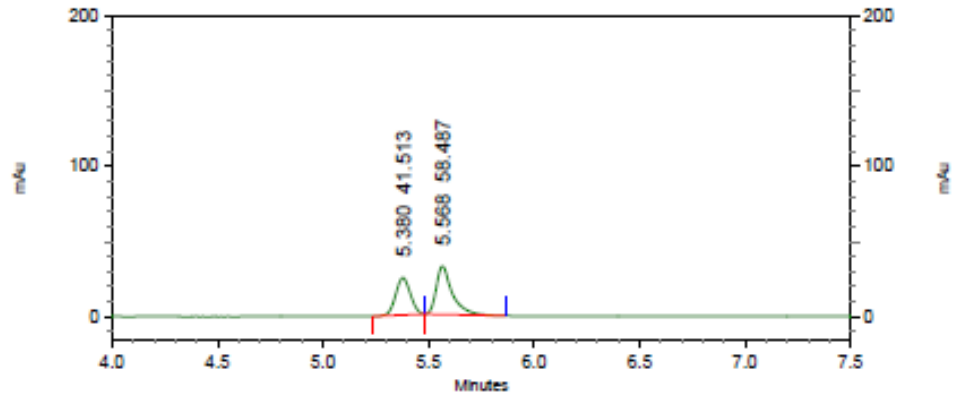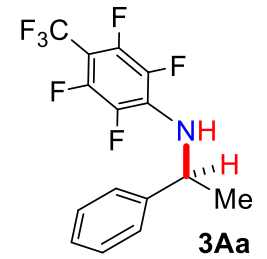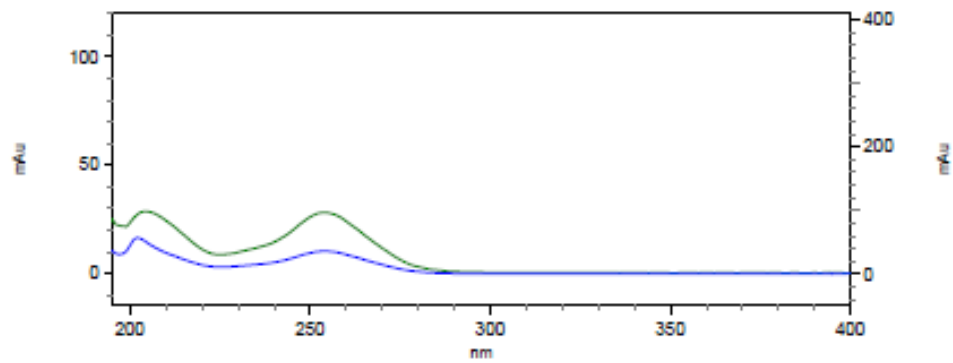

4: 250 nm, 4  
nm Results

| Pk #   | Retention Time | Area Percent |
|--------|----------------|--------------|
| 1      | 5.380          | 41.513       |
| 2      | 5.568          | 58.487       |
| Totals |                | 100.000      |

# <sup>1</sup>H NMR

7.399  
7.387  
7.362  
7.349  
7.337  
7.318  
7.307  
7.296  
7.260

6.079  
6.066  
5.614  
5.599

3.496  
3.485  
3.473  
3.462  
3.450  
3.438  
3.372  
3.360  
3.348  
3.336  
3.324  
3.313  
3.302  
3.217  
3.206  
3.194  
3.181  
3.169  
3.157

1.116  
1.104  
1.092  
0.950  
0.938  
0.926

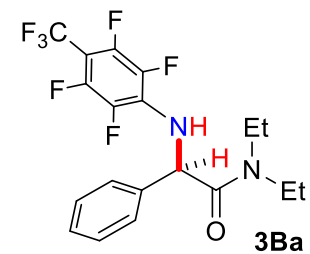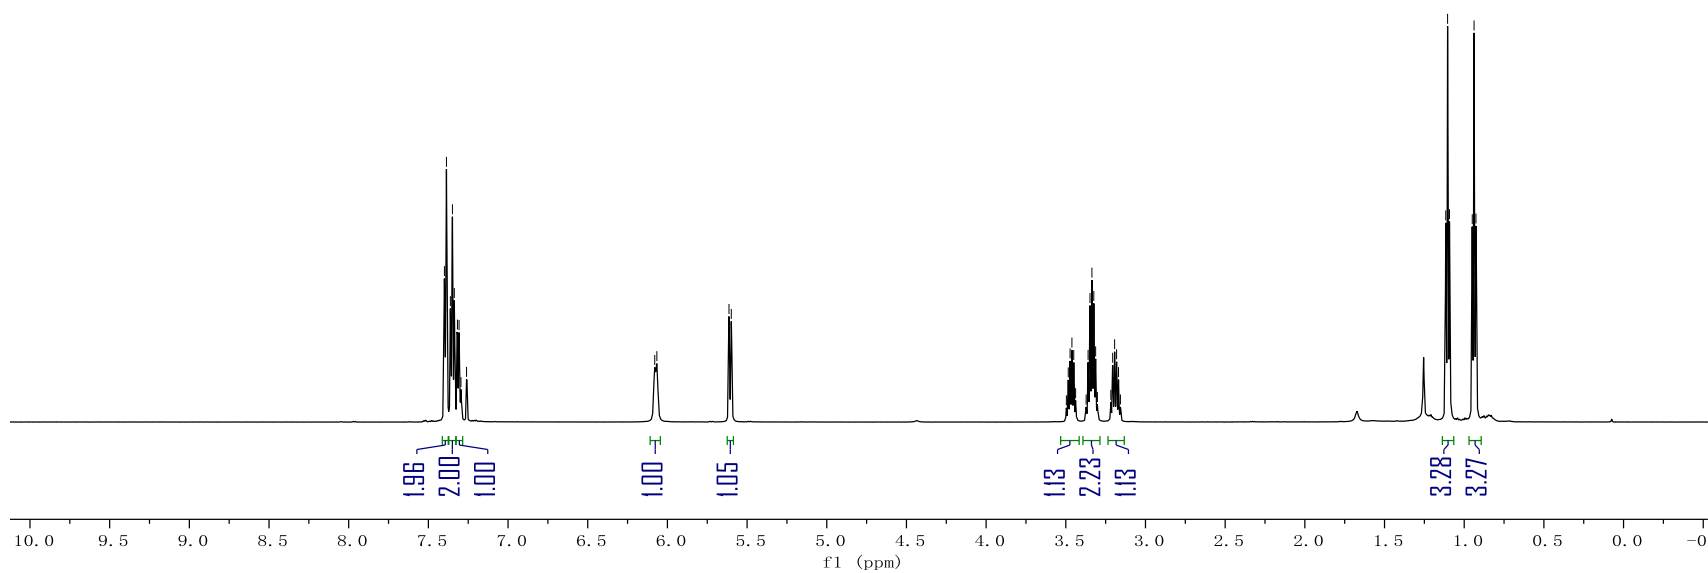

# <sup>13</sup>C NMR

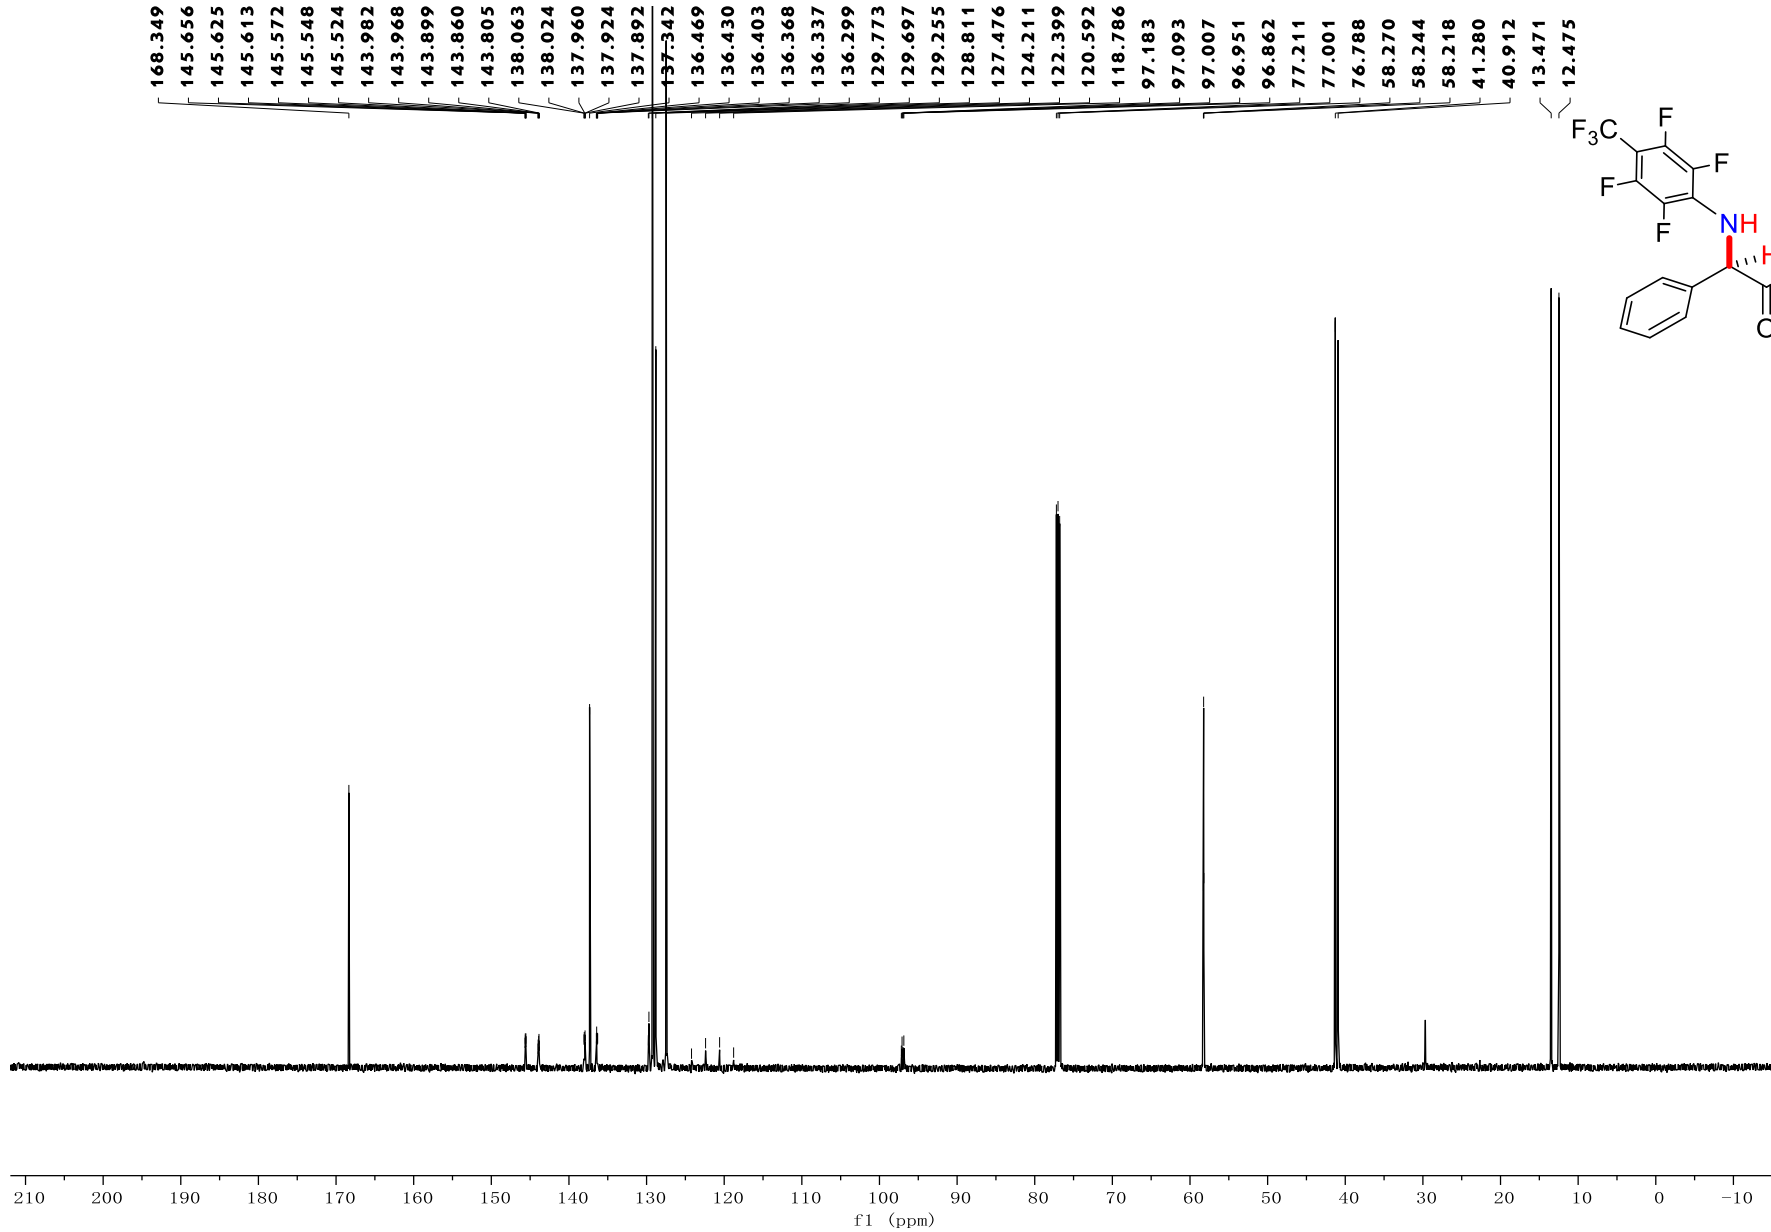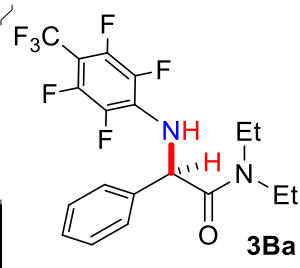

# $^{19}\text{F}$ NMR

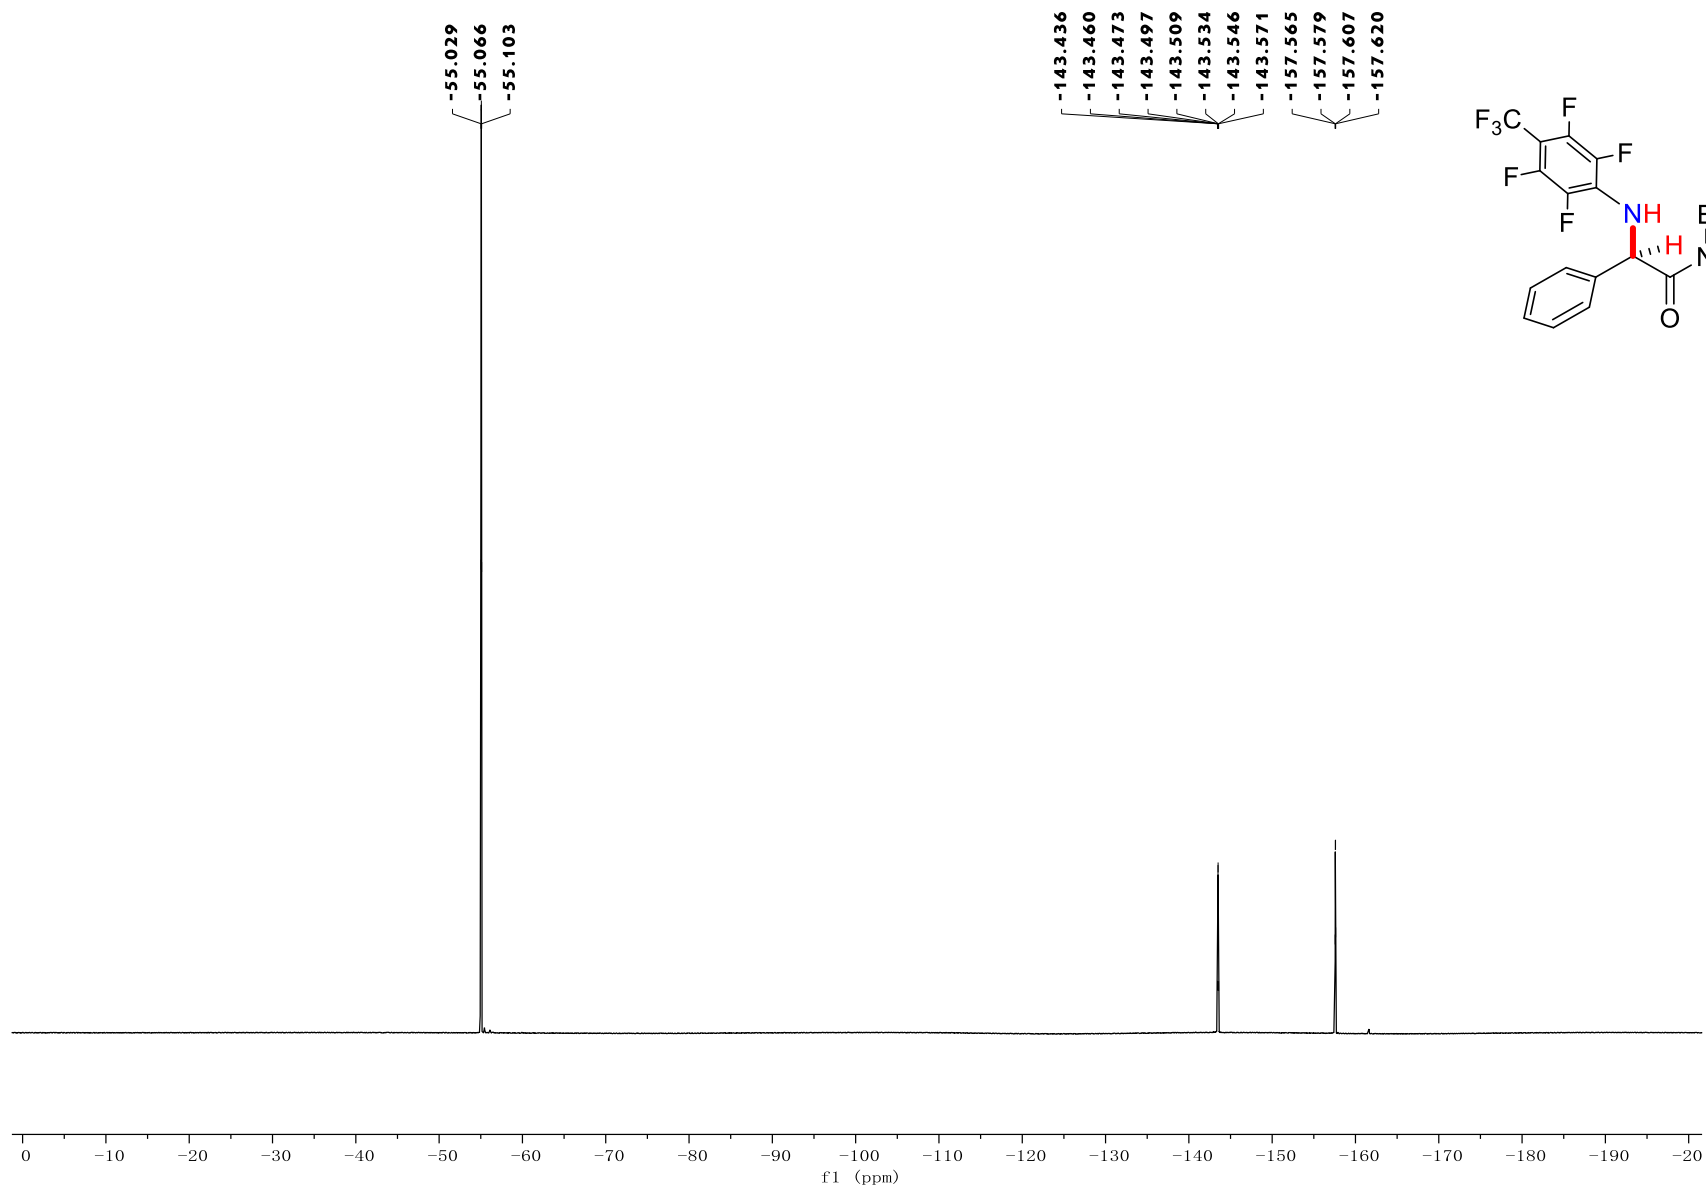

# HPLC

Sample Information  
Sample Name : POX-1948-IA-20%-0.5mL  
Sample ID : POX-1948-IA-20%-0.5mL  
Data File : POX-1948-IA-20%-0.5mL.002.lcd  
Method File : POX-20%.0.5 mL-50min.lcm

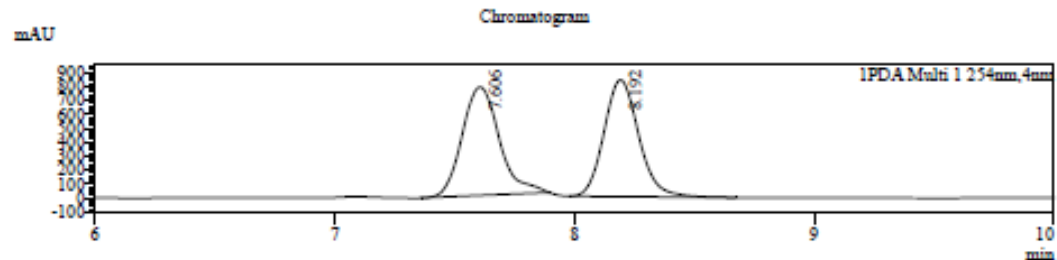

UV Spectrum  
Retention time = 7.606

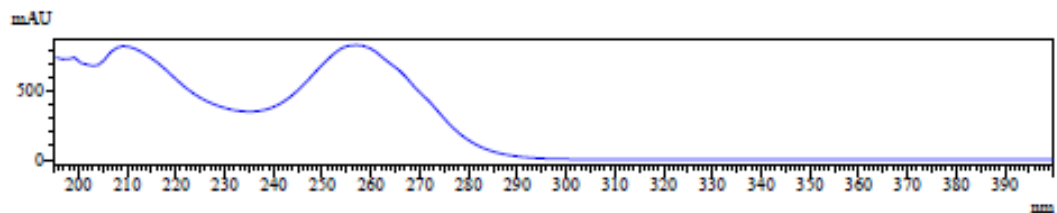

UV Spectrum  
Retention time = 8.192

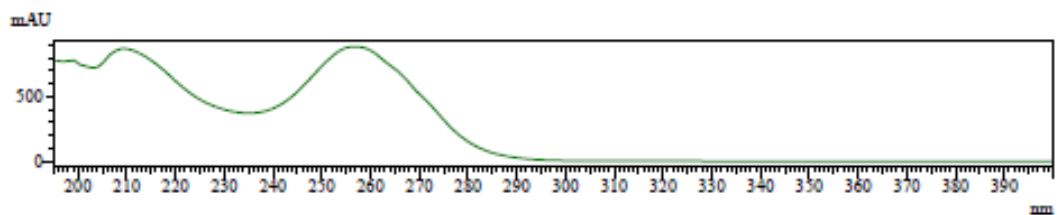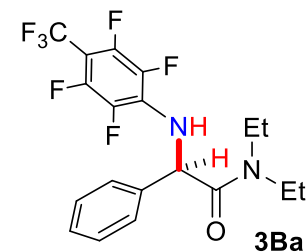

Peak Table

PDA Ch1 254nm

| Peak# | Ret. Time | Area     | Area%   |
|-------|-----------|----------|---------|
| 1     | 7.606     | 8402484  | 49.855  |
| 2     | 8.192     | 8451195  | 50.145  |
| Total |           | 16853680 | 100.000 |

# HPLC

Sample Information  
Sample Name : POX-1949-IA-20%-0.5mL  
Sample ID : POX-1949-IA-20%-0.5mL  
Data File : POX-1949-IA-20%-0.5mL.lcd  
Method File : POX-20%.0.5.mL-50min.lcm

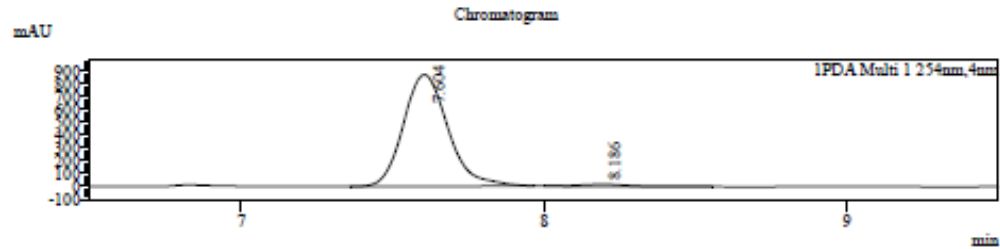

UV Spectrum  
Retention time = 7.604

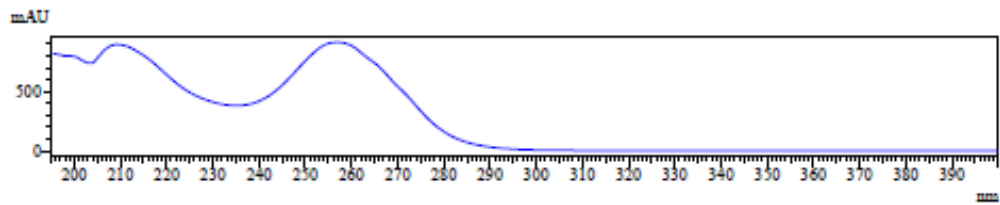

UV Spectrum  
Retention time = 8.186

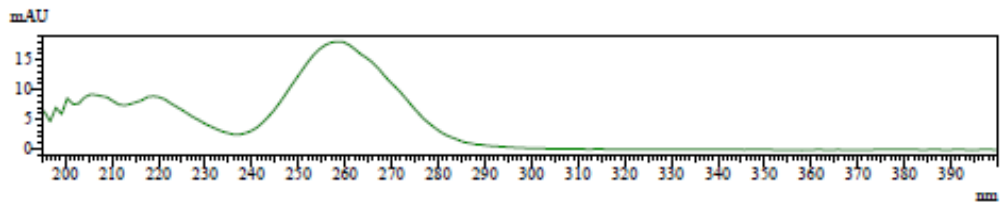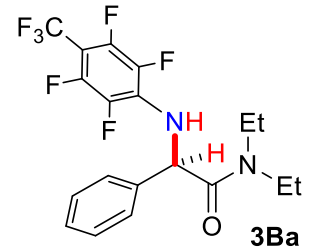

Peak Table

| Peak# | Ret. Time | Area    | Area%   |
|-------|-----------|---------|---------|
| 1     | 7.604     | 8942684 | 98.504  |
| 2     | 8.186     | 135809  | 1.496   |
| Total |           | 9078493 | 100.000 |

# <sup>1</sup>H NMR

7.265  
7.251  
6.880  
6.865

5.663  
5.422  
5.410

4.273  
4.261  
4.255  
4.243  
4.163  
4.151  
4.145  
4.133  
3.787

1.216  
1.204  
1.192

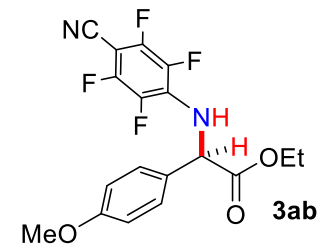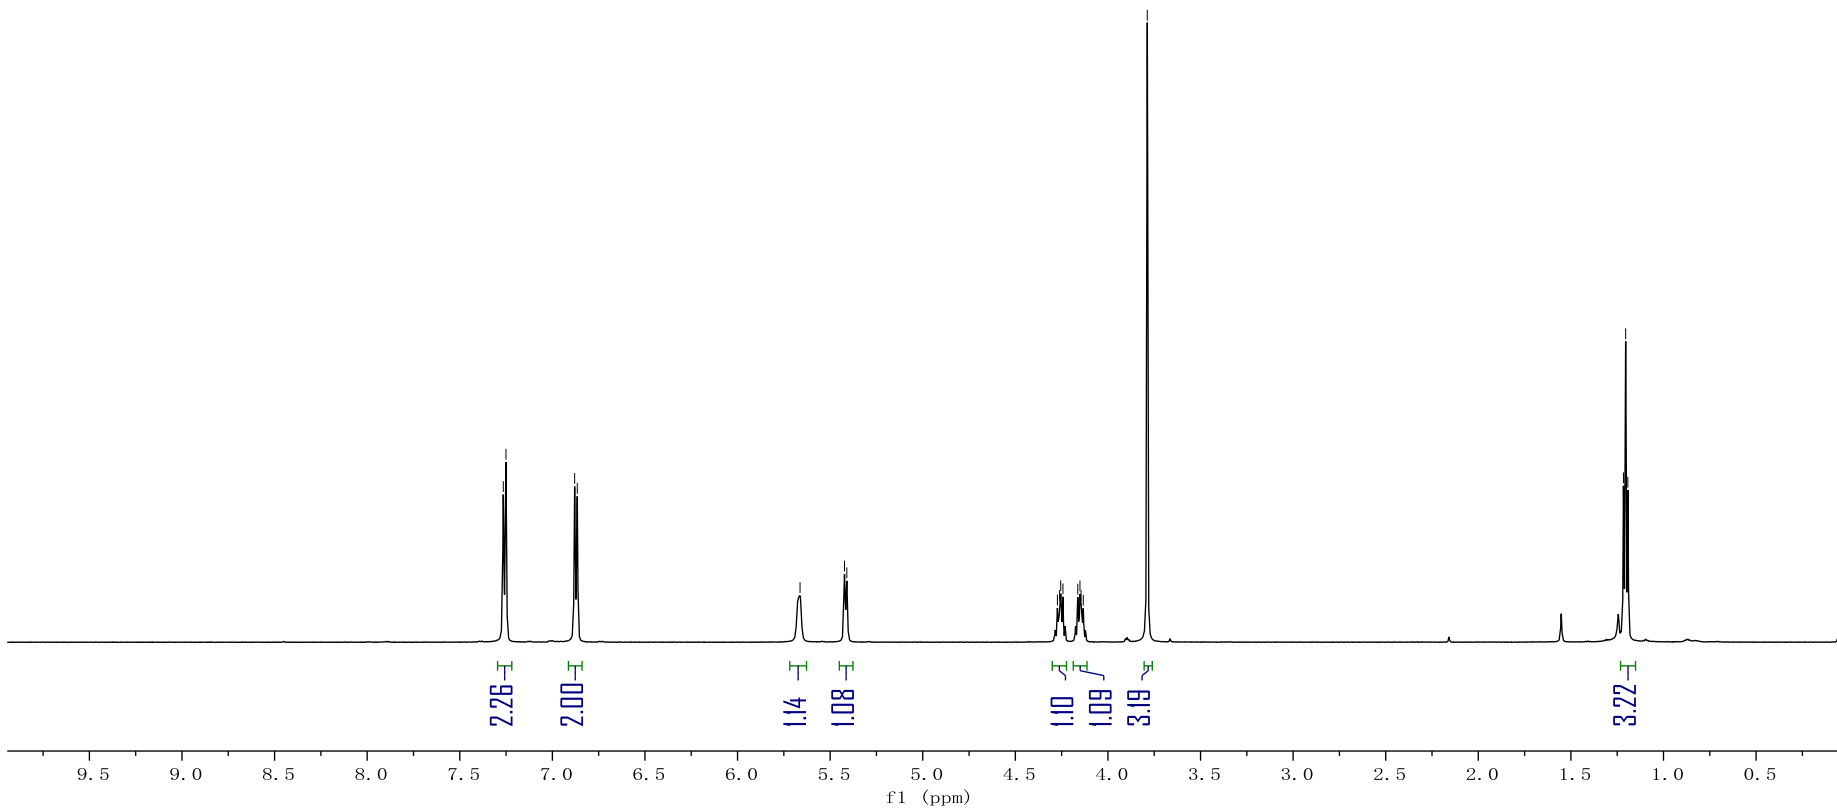



<sup>13</sup>C NMR

170.707  
160.080  
149.174  
149.036  
146.652  
146.559  
146.479  
137.386  
137.372  
135.160  
135.099  
134.952  
131.407  
131.295  
131.256  
128.297  
128.108  
114.555  
108.563  
108.527  
108.492

80.997  
80.821  
80.665

62.489  
59.953  
55.275

13.927

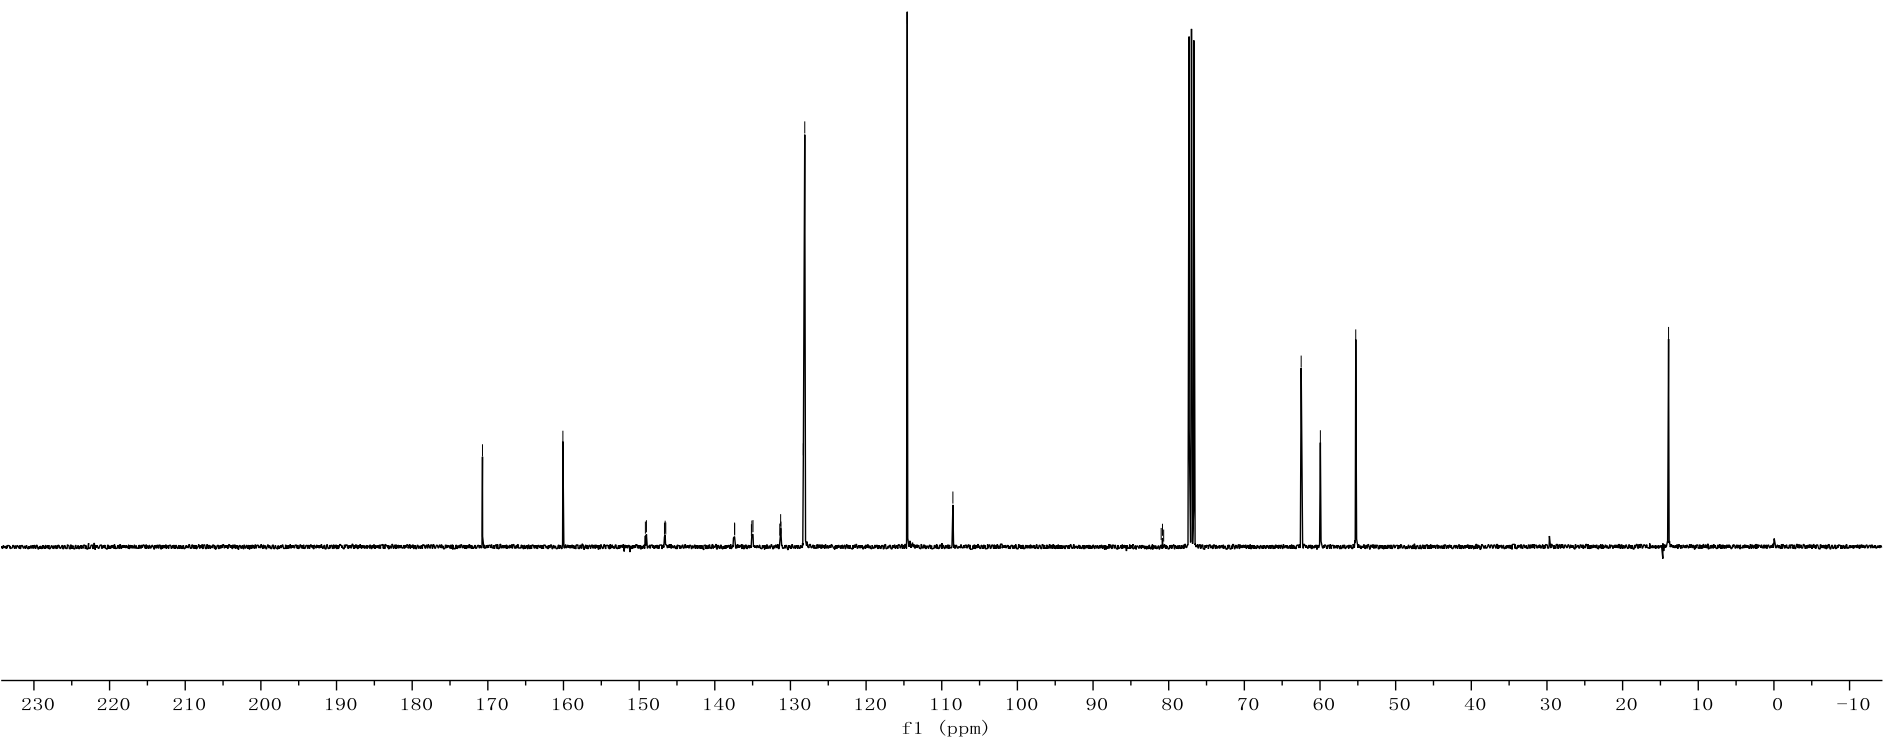

# $^{19}\text{F}$ NMR

-134.758  
-134.775  
-134.786  
-134.811  
-134.823  
-134.840  
  
-157.653  
-157.682

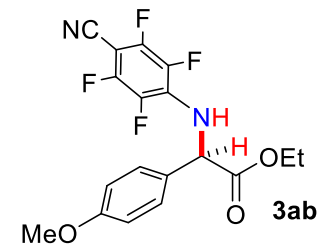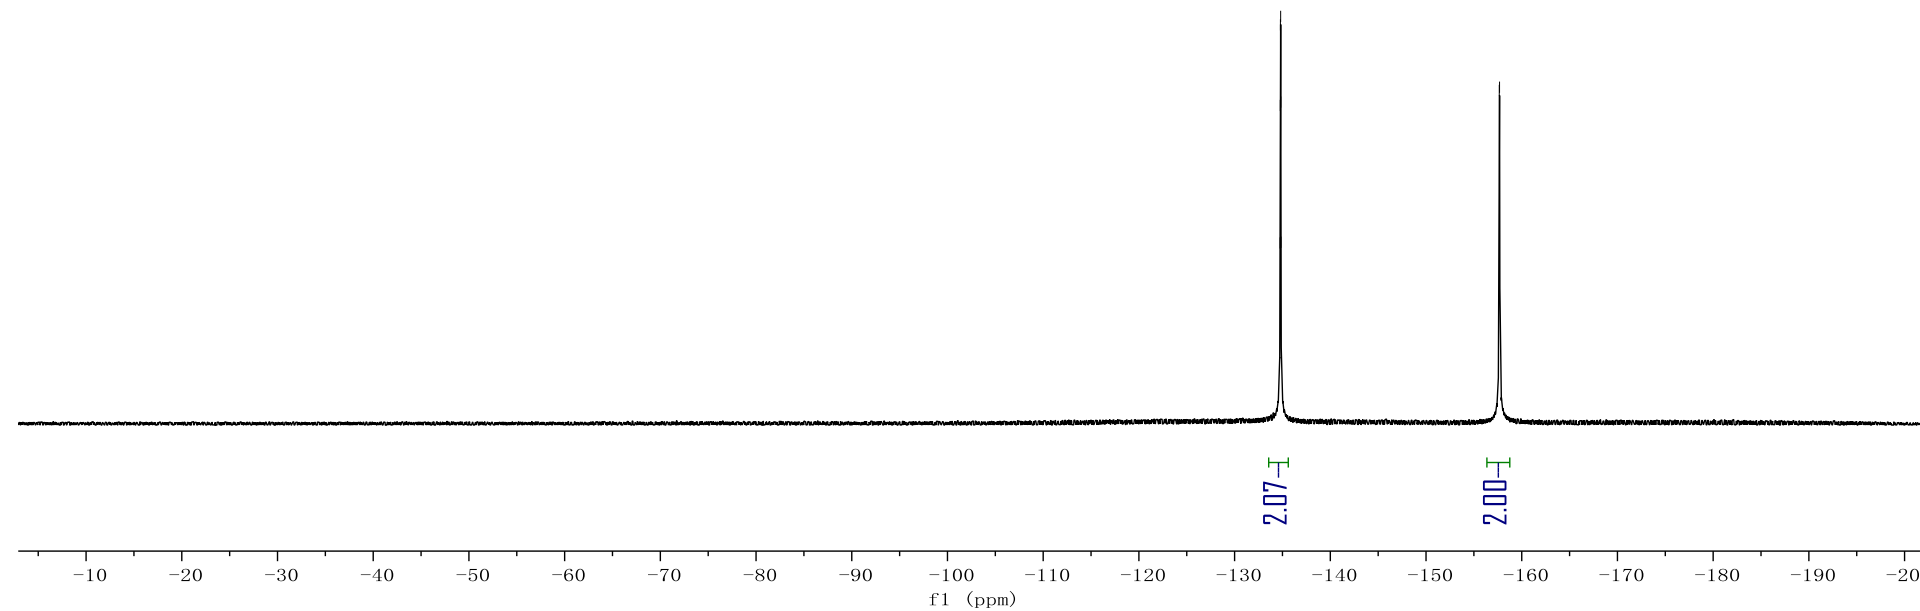

# HPLC

## Sample Information

Sample Name : P0X-0809-IC10%-0.8MI  
Sample ID : P0X-0809-IC10%-0.8MI  
Data File : P0X-0809-IC10%-0.8MI.lcd  
Method File : P0X-10%-0.8ml.lcm

## Chromatogram

mAU

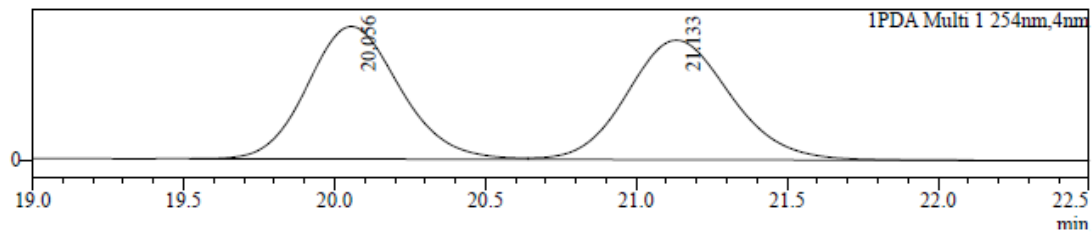

UV Spectrum

Retention time = 20.056

mAU

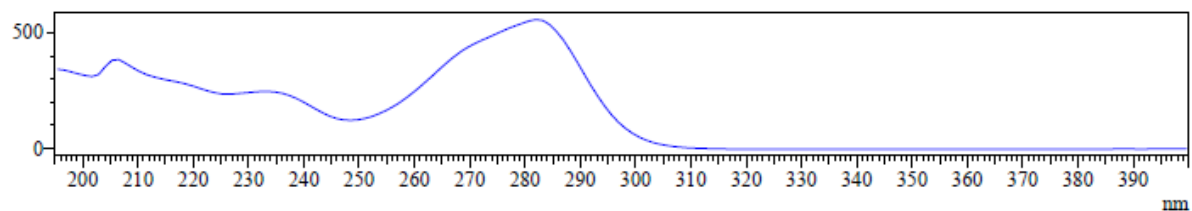

UV Spectrum

Retention time = 21.133

mAU

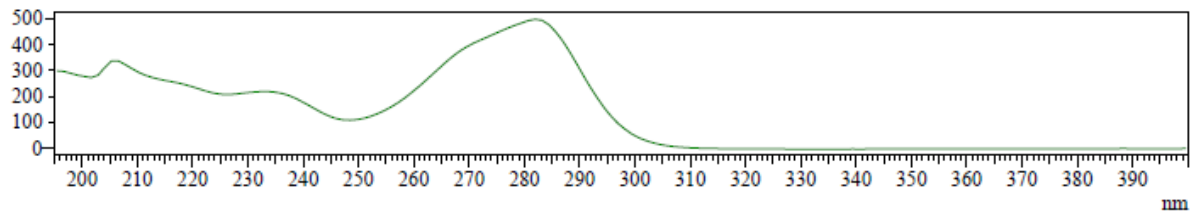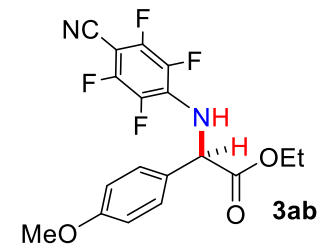

## Peak Table

PDA Ch1 254nm

| Peak# | Ret. Time | Area    | Area%   |
|-------|-----------|---------|---------|
| 1     | 20.056    | 3388030 | 49.763  |
| 2     | 21.133    | 3420340 | 50.237  |
| Total |           | 6808370 | 100.000 |

# HPLC

## Sample Information

Sample Name : P0X-0810-IC10%-0.8MI  
Sample ID : P0X-0810-IC10%-0.8MI  
Data File : P0X-0810-IC10%-0.8MI.lcd  
Method File : P0X-10%-0.8ml.lcm

## Chromatogram

mAU

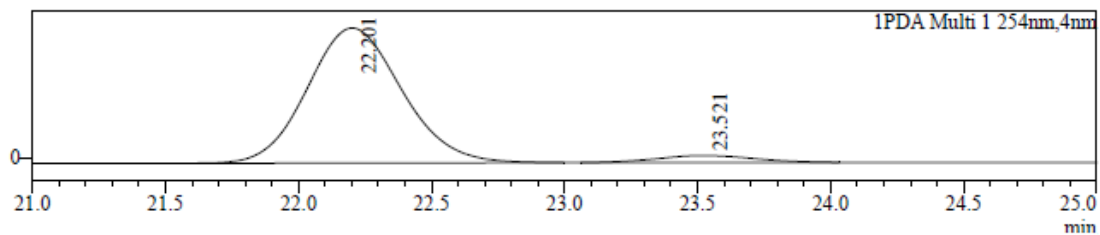

UV Spectrum  
Retention time = 22.201

mAU

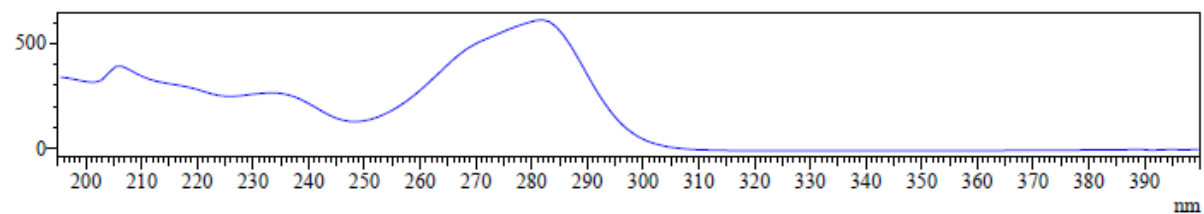

UV Spectrum  
Retention time = 23.521

mAU

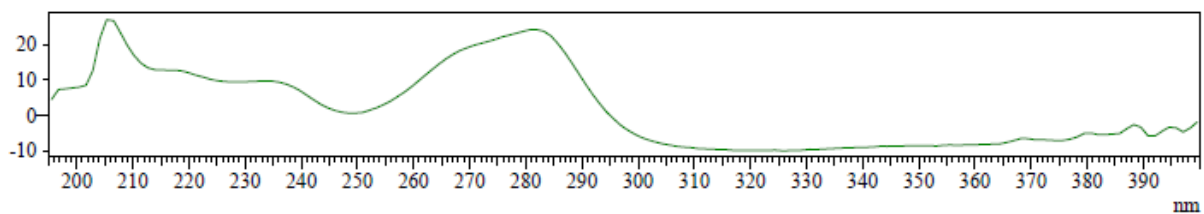

## Peak Table

PDA Ch1 254nm

| Peak# | Ret. Time | Area    | Area%   |
|-------|-----------|---------|---------|
| 1     | 22.201    | 4481981 | 95.079  |
| 2     | 23.521    | 231967  | 4.921   |
| Total |           | 4713948 | 100.000 |

# <sup>1</sup>H NMR

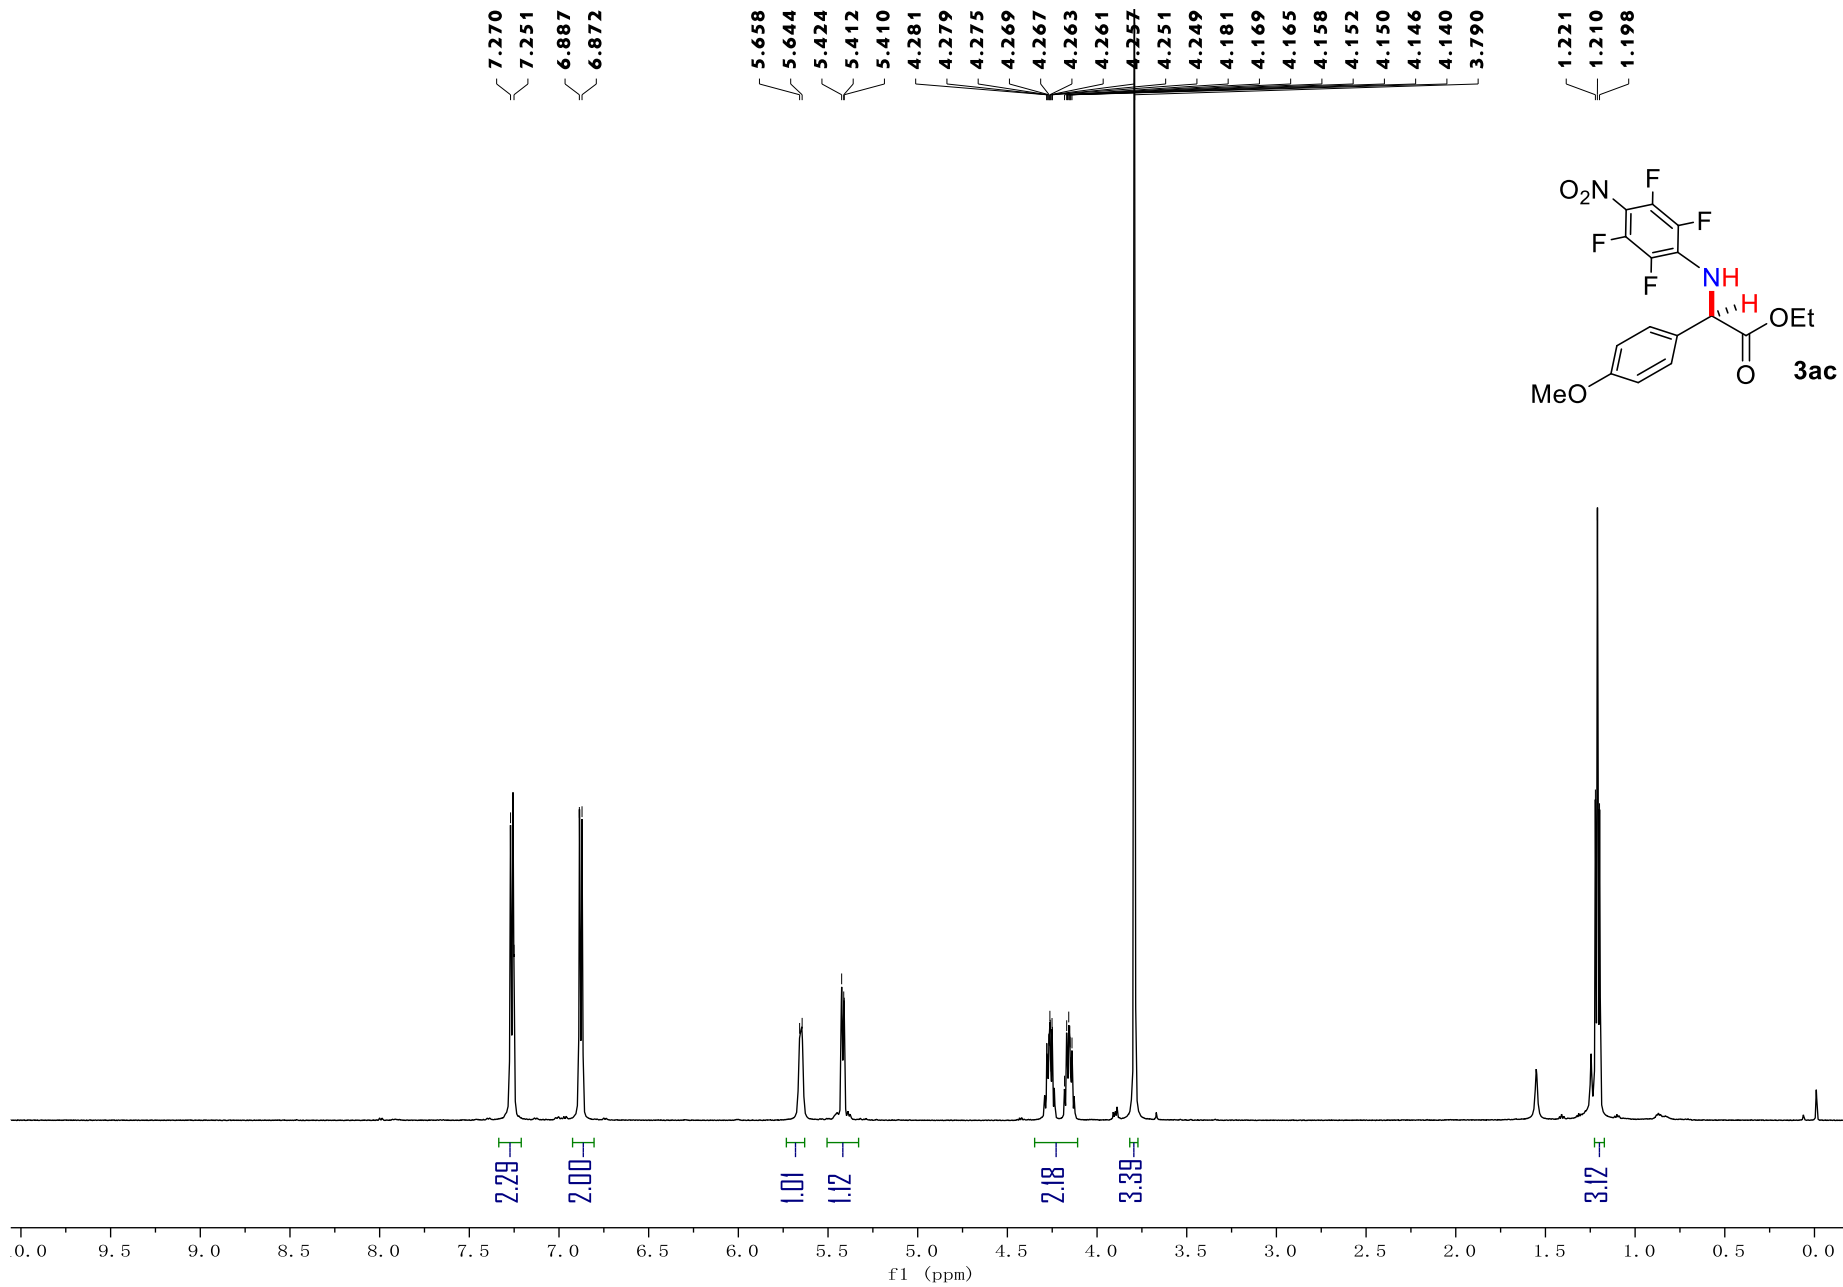

# <sup>13</sup>C NMR

173.340  
162.775  
145.771  
145.674  
144.039  
143.941  
139.687  
139.596  
138.075  
137.977  
132.973  
130.864  
130.735  
122.724  
117.221  
79.862  
79.649  
79.438  
65.194  
62.627  
57.896  
16.610

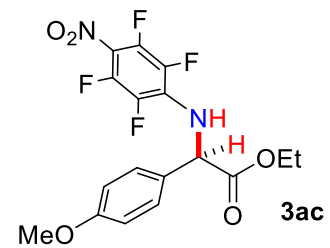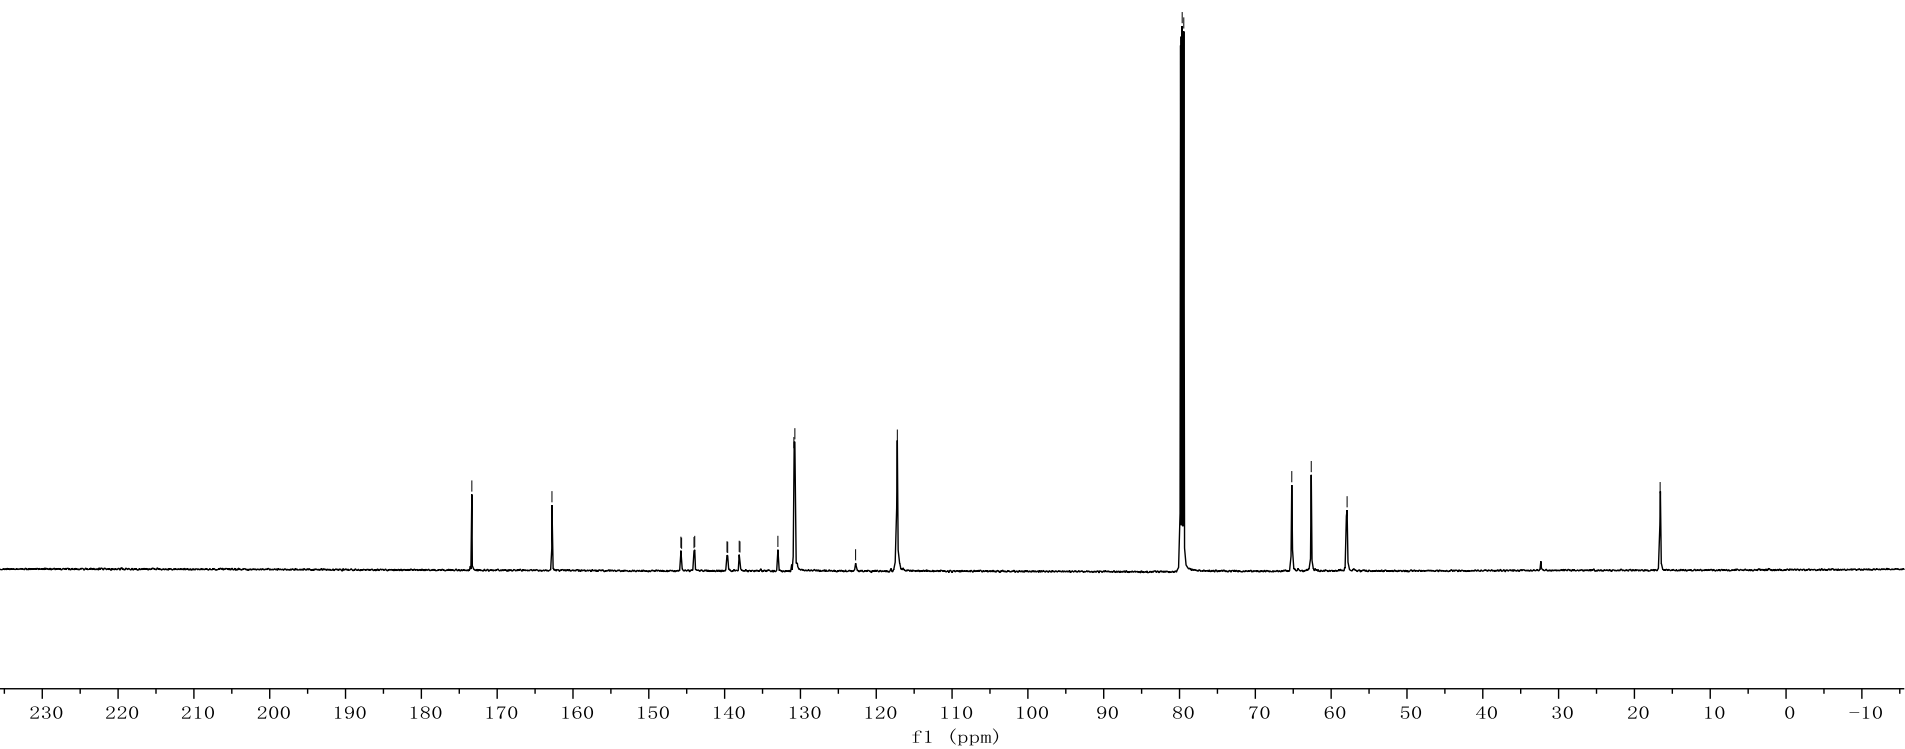

# $^{19}\text{F}$ NMR

-146.914  
-146.929  
-146.941  
-146.970  
-146.981  
-146.997  
-158.449  
-158.480

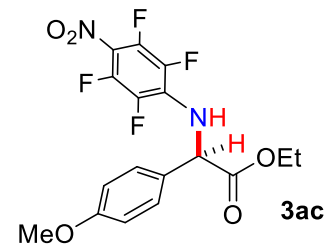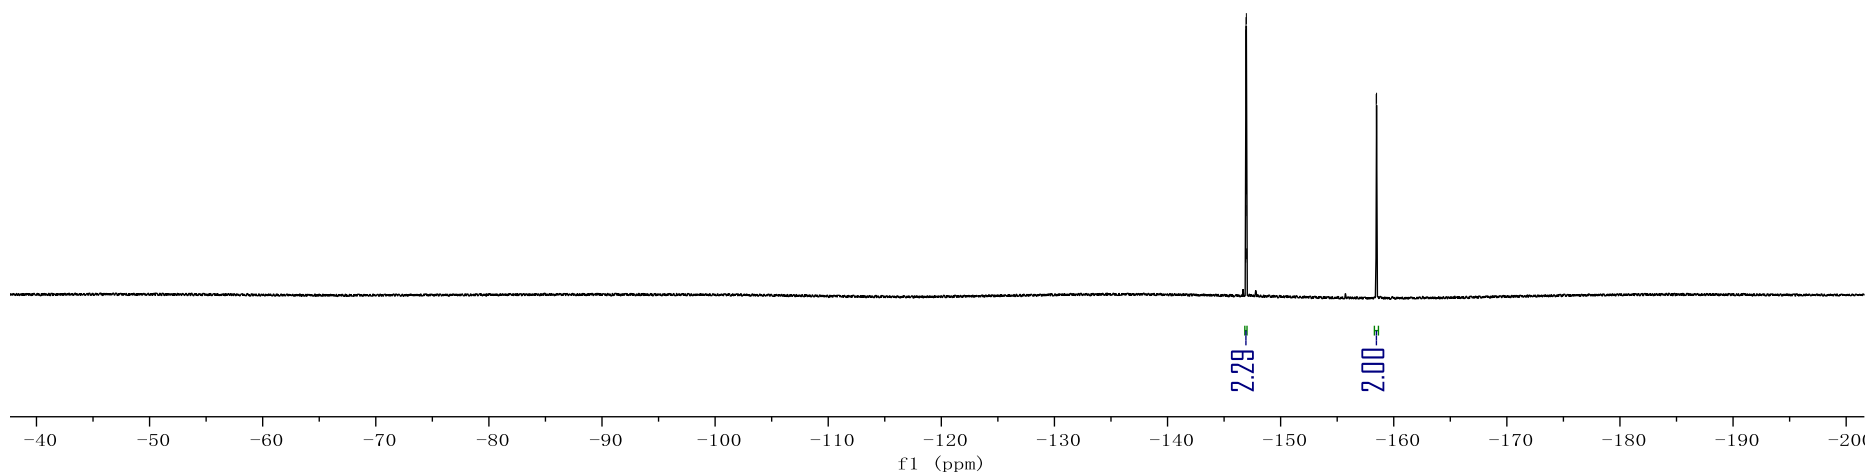

# HPLC

## Sample Information

Sample Name : P0X-0721-IC-10%-0.8mL  
Sample ID : P0X-0721-IC-10%-0.8mL  
Data File : P0X-0721-IC-10%-0.8mL.lcd  
Method File : P0X-10%-0.8ml.lcm

## Chromatogram

mAU

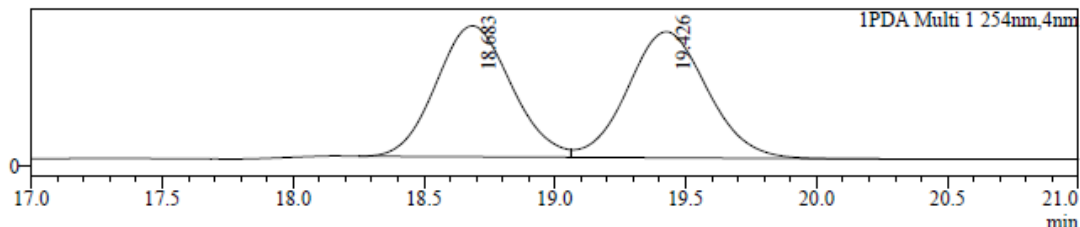

UV Spectrum

Retention time = 18.683

mAU

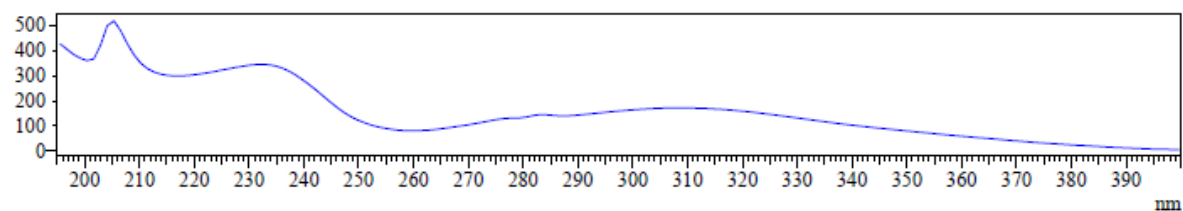

UV Spectrum

Retention time = 19.426

mAU

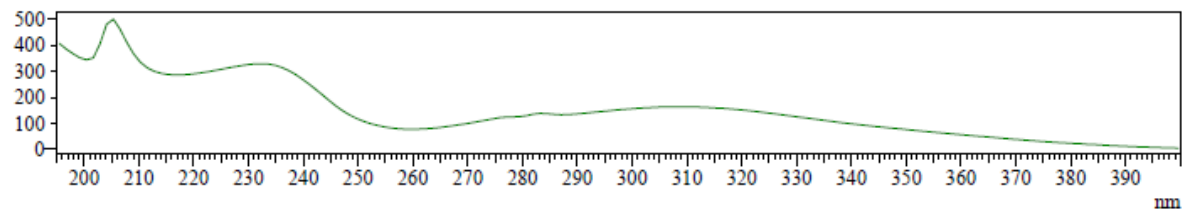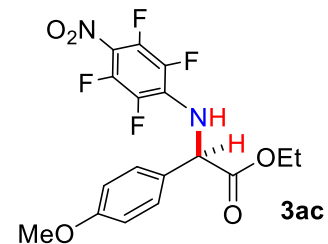

## Peak Table

PDA Ch1 254nm

| Peak# | Ret. Time | Area    | Area%   |
|-------|-----------|---------|---------|
| 1     | 18.683    | 1787988 | 49.507  |
| 2     | 19.426    | 1823624 | 50.493  |
| Total |           | 3611613 | 100.000 |



# HPLC

## Sample Information

Sample Name : P0X-0722-IC-10%-0.8mL  
Sample ID : P0X-0722-IC-10%-0.8mL  
Data File : P0X-0722-IC-10%-0.8mL.lcd  
Method File : P0X-10%-0.8ml.lcm

## Chromatogram

mAU

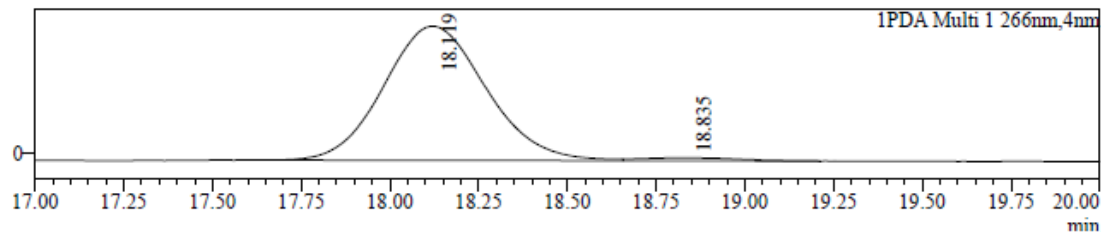

## UV Spectrum

Retention time = 18.119

mAU

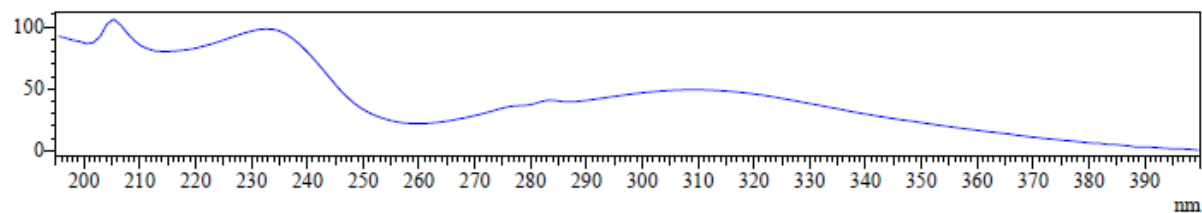

## UV Spectrum

Retention time = 18.835

mAU

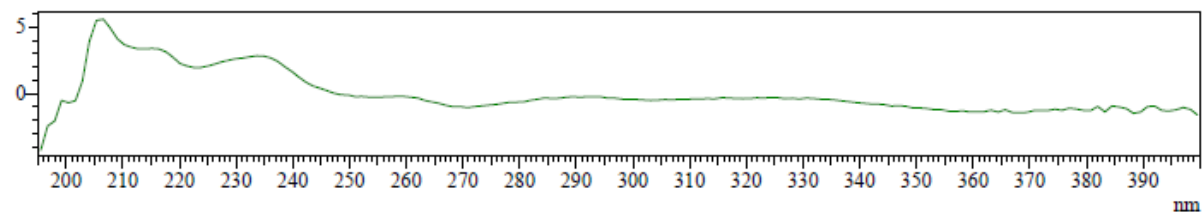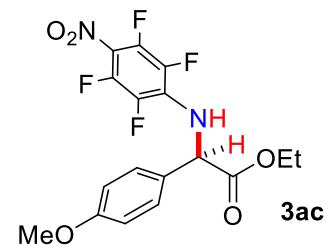

## Peak Table

PDA Ch1 266nm

| Peak# | Ret. Time | Area   | Area%   |
|-------|-----------|--------|---------|
| 1     | 18.119    | 520416 | 97.840  |
| 2     | 18.835    | 11489  | 2.160   |
| Total |           | 531905 | 100.000 |

# <sup>1</sup>H NMR

7.345  
7.330  
7.315  
7.291  
7.274  
7.139  
7.123  
6.897  
6.880  
5.681  
5.666  
5.427  
5.412  
4.285  
4.270  
4.264  
4.250  
4.176  
4.162  
4.155  
4.141  
3.807

1.226  
1.212  
1.198

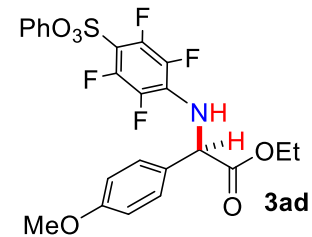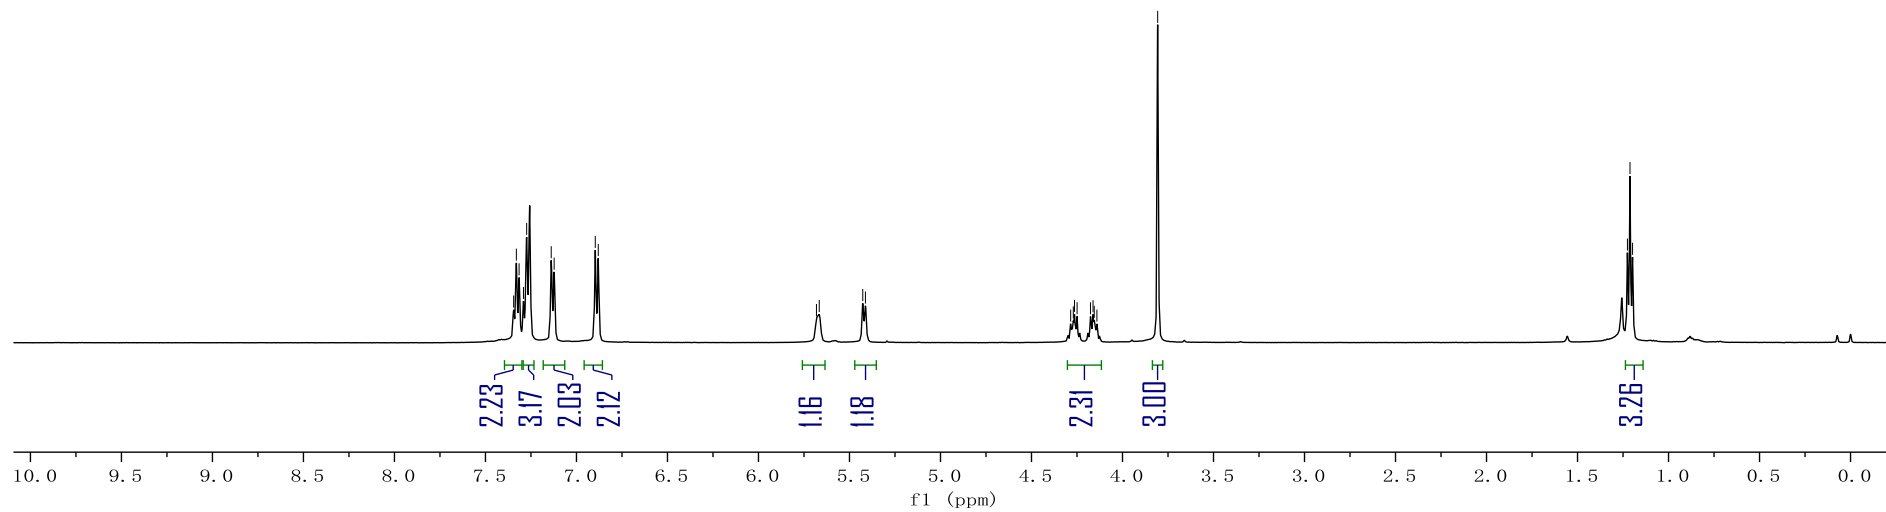

<sup>13</sup>C NMR

170.697  
160.075  
149.099  
146.573  
146.440  
146.390  
143.991  
143.865  
137.635  
137.478  
137.421  
135.199  
131.764  
131.653  
129.920  
128.126  
127.588  
121.702  
114.553  
102.230  
102.083  
101.939  
62.495  
59.934  
55.289

13.933

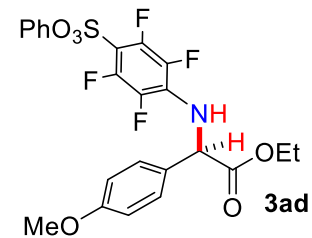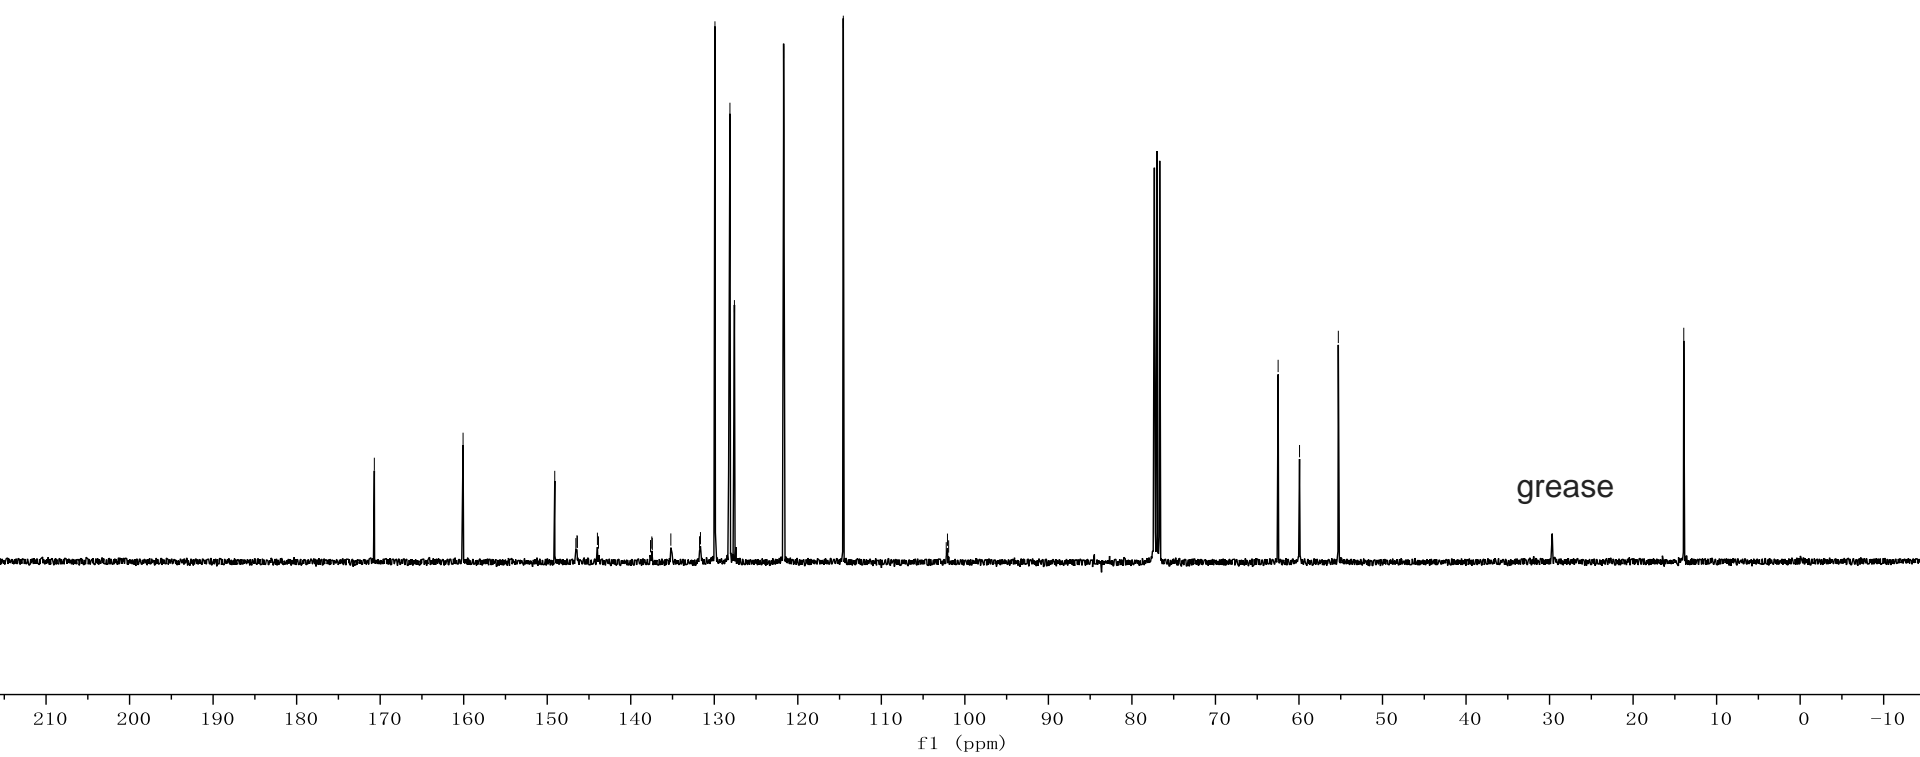

# $^{19}\text{F}$ NMR

-136.664  
-136.686  
-136.702  
-136.735  
-136.747

-157.891  
-157.911

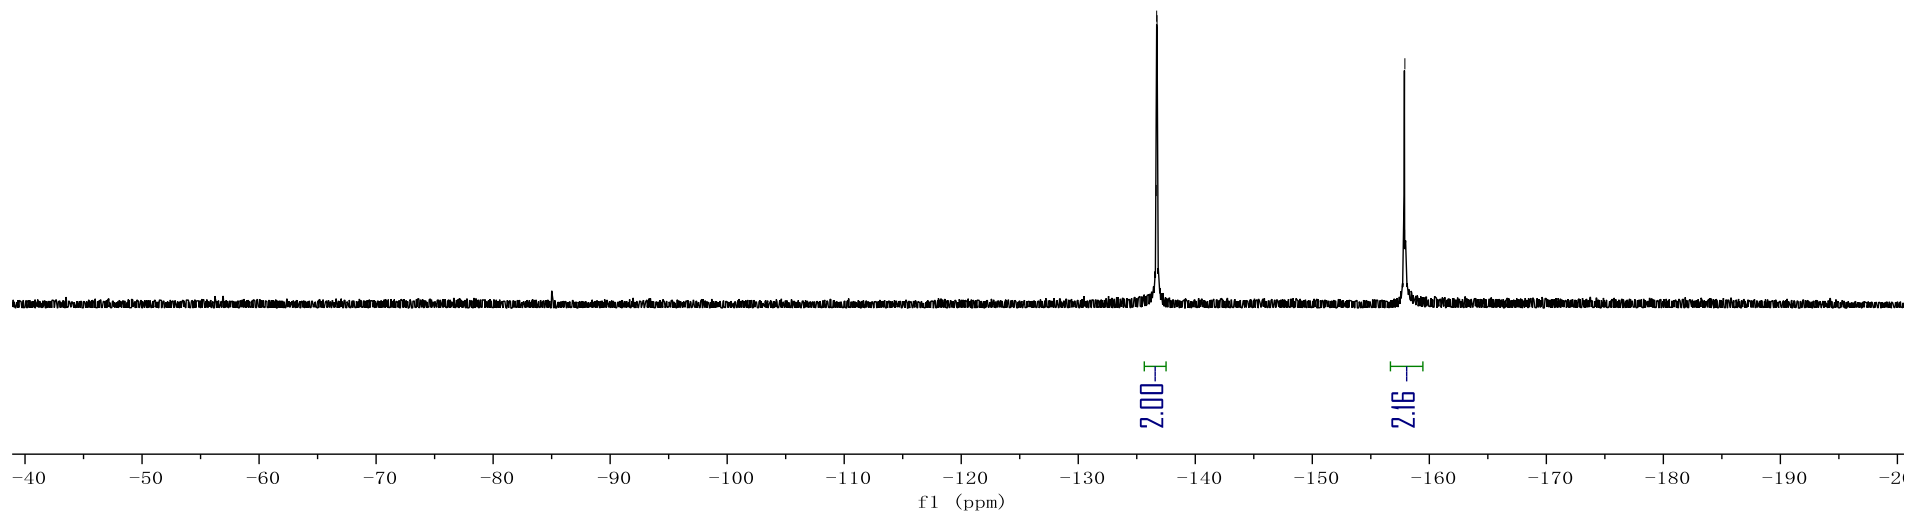

# HPLC

## Sample Information

Sample Name : P0X781-ODH-5%-0.8Ml  
Sample ID : P0X781-ODH-5%-0.8Ml  
Data File : P0X781-ODH-5%-0.8Ml.lcd  
Method File : P0X-5.0%-0.8ml.lcm

## Chromatogram

mAU

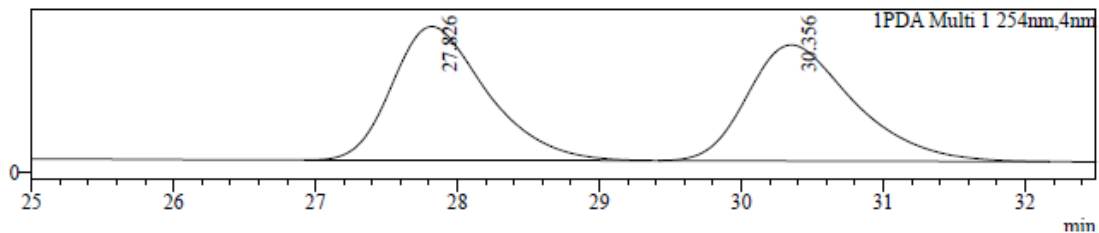

UV Spectrum  
Retention time = 27.826

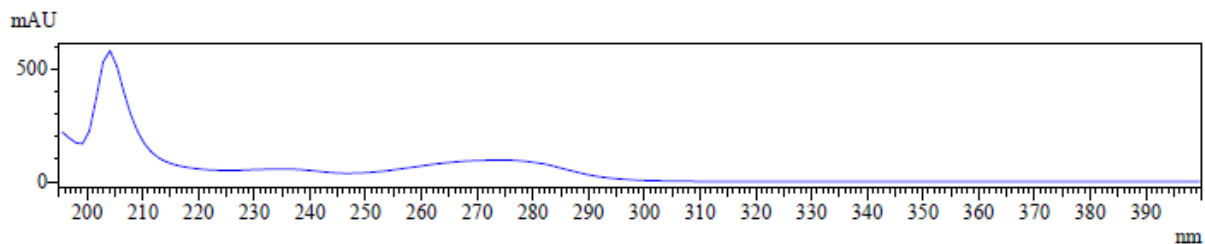

UV Spectrum  
Retention time = 30.356

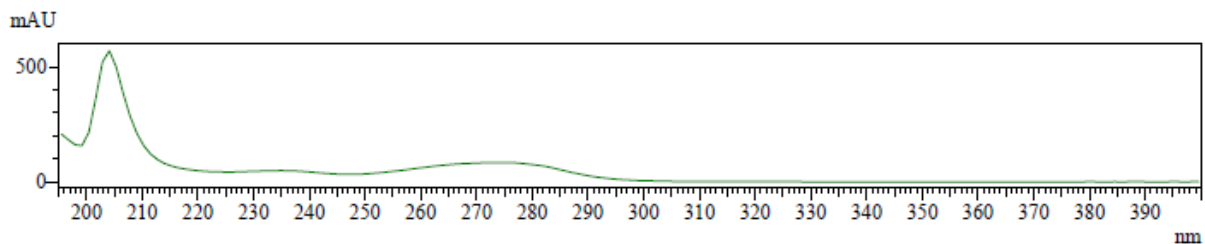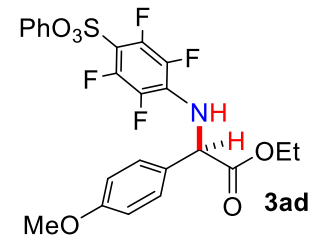

## Peak Table

PDA Ch1 254nm

| Peak# | Ret. Time | Area    | Area%   |
|-------|-----------|---------|---------|
| 1     | 27.826    | 2142424 | 50.621  |
| 2     | 30.356    | 2089898 | 49.379  |
| Total |           | 4232322 | 100.000 |

# HPLC

## Sample Information

Sample Name : P0X788---ODH-5%-0.8Ml  
Sample ID : P0X788---ODH-5%-0.8Ml  
Data File : P0X788---ODH-5%-0.8Ml.lcd  
Method File : P0X-5.0%-0.8ml.lcm

## Chromatogram

mAU

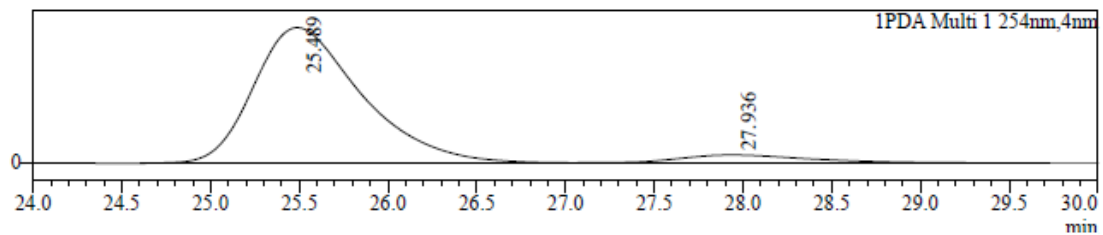

UV Spectrum

Retention time = 25.489

mAU

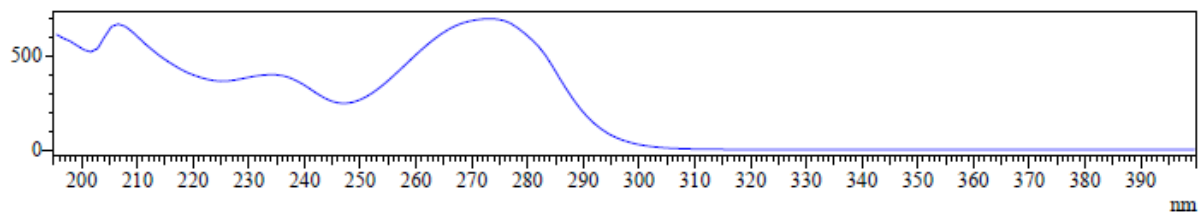

UV Spectrum

Retention time = 27.936

mAU

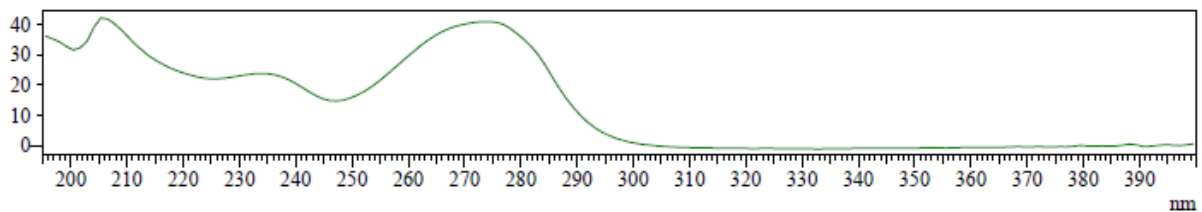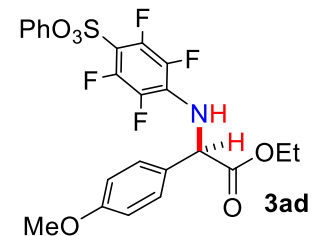

## Peak Table

PDA Ch1 254nm

| Peak# | Ret. Time | Area     | Area%   |
|-------|-----------|----------|---------|
| 1     | 25.489    | 14766510 | 93.292  |
| 2     | 27.936    | 1061720  | 6.708   |
| Total |           | 15828230 | 100.000 |

# <sup>1</sup>H NMR

7.273  
7.269  
7.258  
6.863  
6.849

5.403  
4.262  
4.256  
4.250  
4.244  
4.238  
4.232  
4.220  
4.165  
4.153  
4.147  
4.141  
4.135  
4.130  
4.123  
3.873  
3.779

1.213  
1.201  
1.189

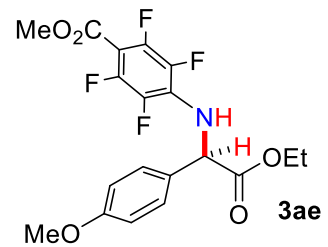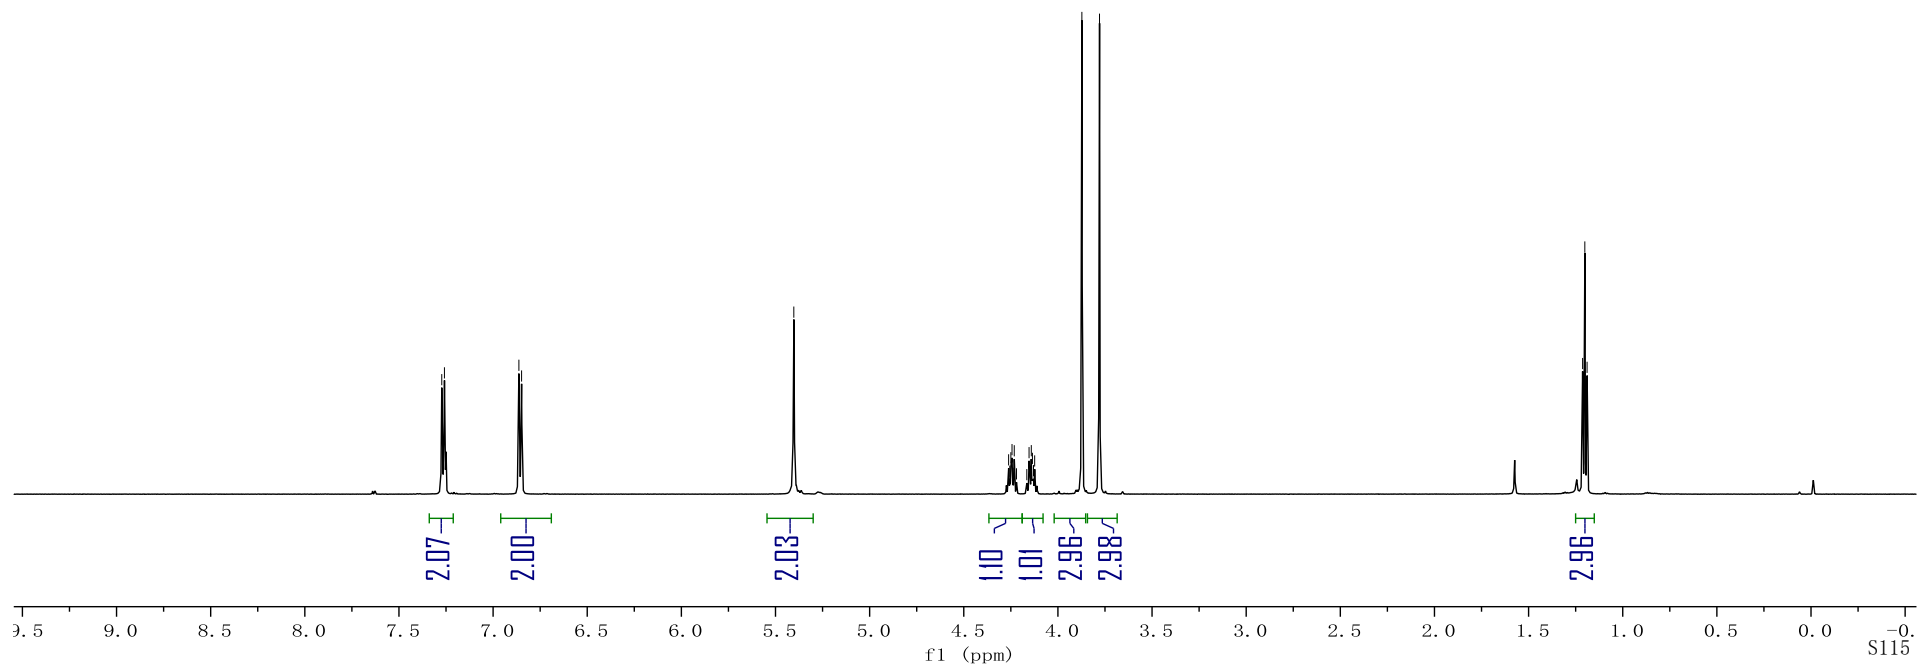

# $^{13}\text{C}$ NMR

171.066  
160.921  
160.897  
160.873  
159.921  
147.339  
147.312  
147.285  
147.252  
147.233  
147.205  
147.151  
145.310  
145.276  
145.254  
145.226  
145.206  
145.174  
145.146  
145.120  
137.977  
137.942  
137.898  
137.845  
137.809  
137.768  
136.066  
136.024  
135.990  
135.938  
135.902  
135.887  
135.857  
129.163  
129.132  
129.102  
129.071  
129.041  
128.979  
128.817  
128.753  
128.142  
114.435  
99.971  
99.857  
99.744  
62.216  
60.133  
55.240  
52.517  
13.941

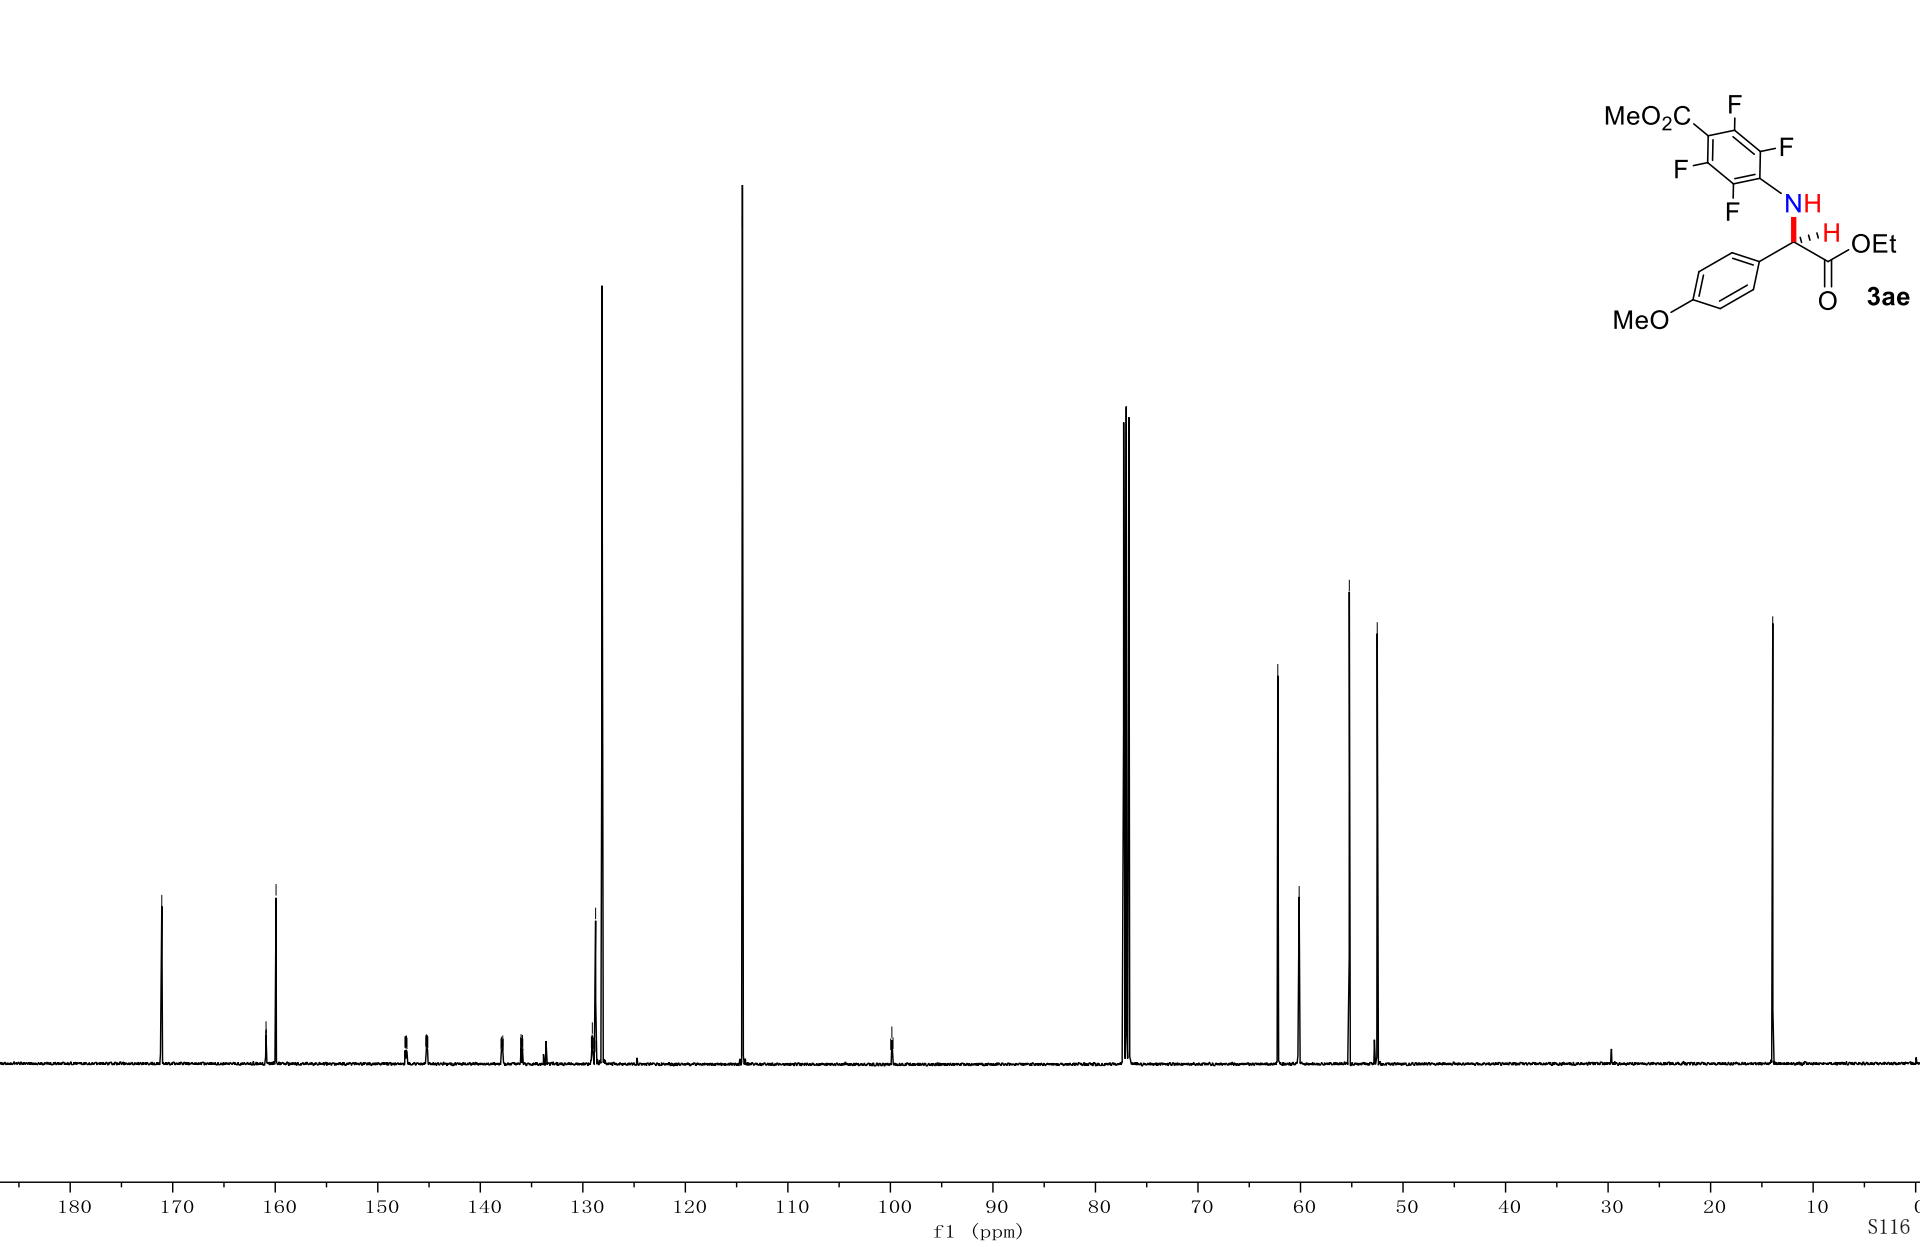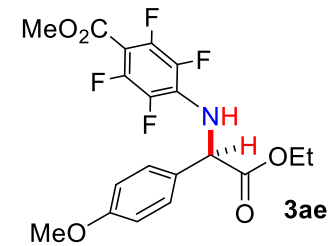



# <sup>19</sup>F NMR

-140.207  
-140.217  
-140.222  
-140.231  
-140.254  
-140.263  
-140.268  
-140.279  
-159.004  
-159.012  
-159.019  
-159.042  
-159.050  
-159.057

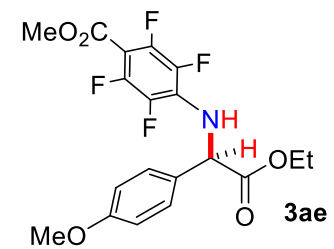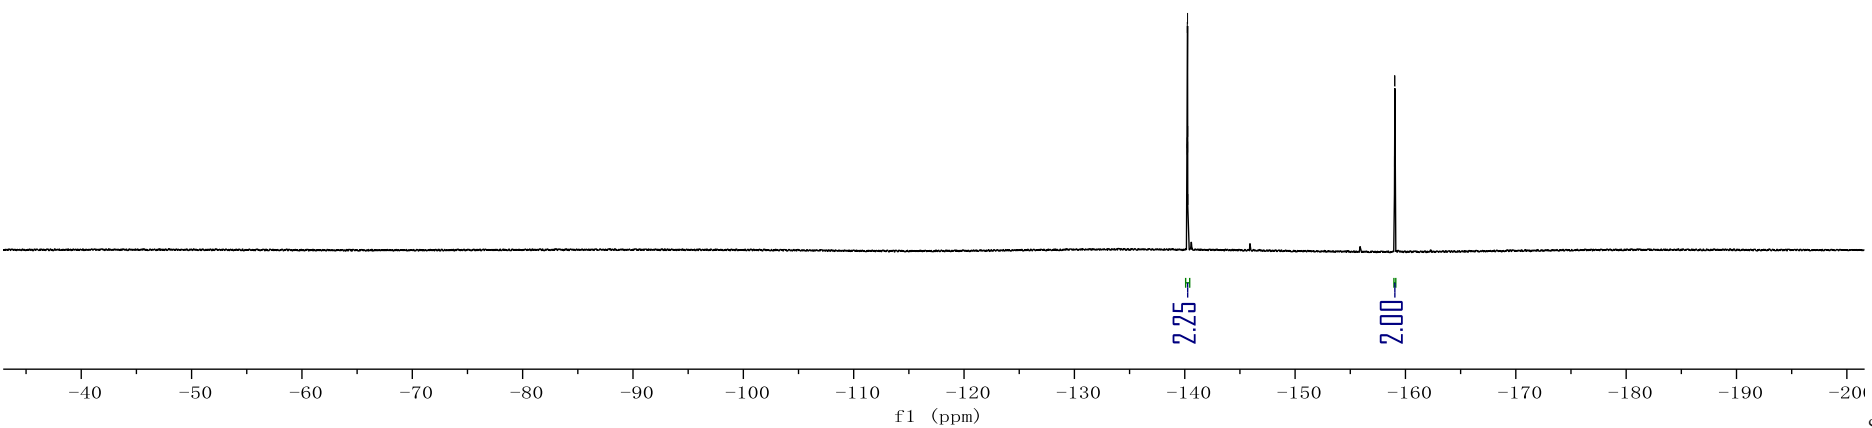

# HPLC

## Sample Information

Sample Name : P0X-0711-IC-10%-0.8mL  
Sample ID : P0X-0711-IC-10%-0.8mL  
Data File : P0X-0711-IC-10%-0.8mL.lcd  
Method File : YW-10%-0.8ml.lcm

## Chromatogram

mAU

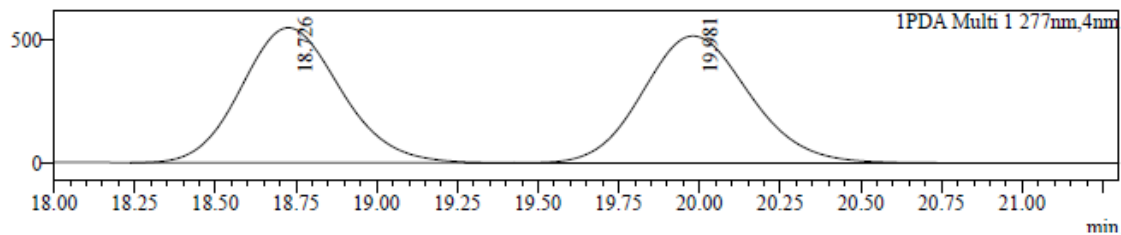

## UV Spectrum

Retention time = 18.726

mAU

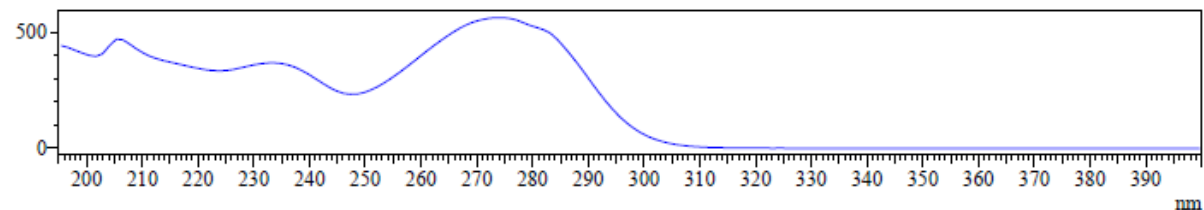

## UV Spectrum

Retention time = 19.981

mAU

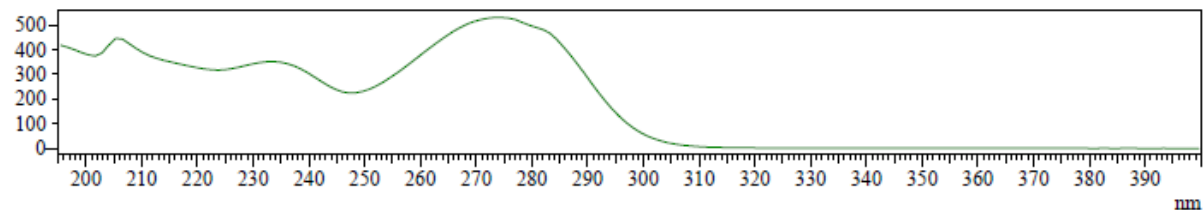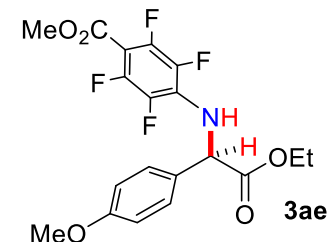

## Peak Table

PDA Ch1 277nm

| Peak# | Ret. Time | Area     | Area%   |
|-------|-----------|----------|---------|
| 1     | 18.726    | 11750787 | 49.665  |
| 2     | 19.981    | 11909174 | 50.335  |
| Total |           | 23659961 | 100.000 |

# HPLC

## Sample Information

Sample Name : P0X-0712IC-10%-0.8mL  
Sample ID : P0X-0712IC-10%-0.8mL  
Data File : P0X-0712IC-10%-0.8mL.lcd  
Method File : P0X-10%-0.8ml.lcm

## Chromatogram

mAU

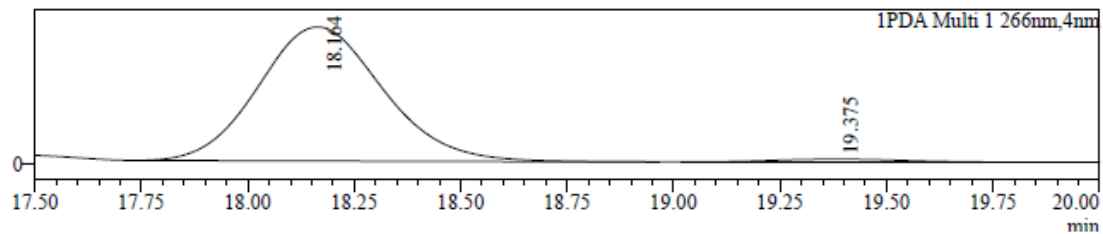

## UV Spectrum

Retention time = 18.164

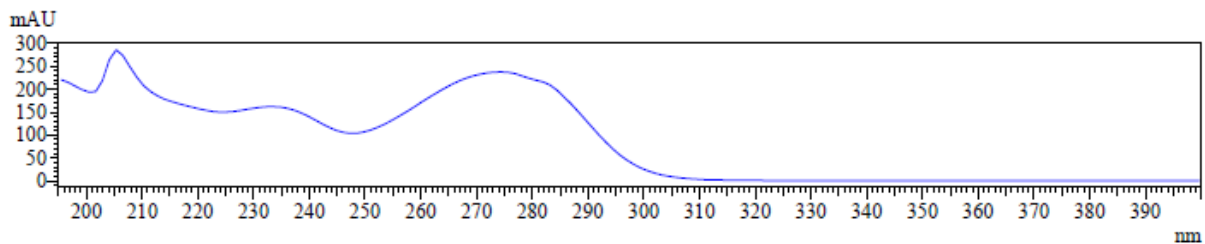

## UV Spectrum

Retention time = 19.375

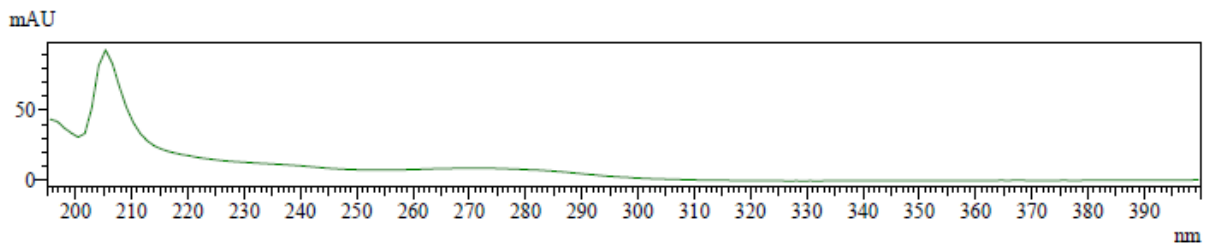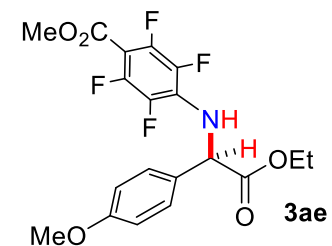

## Peak Table

PDA Ch1 266nm

| Peak# | Ret. Time | Area    | Area%   |
|-------|-----------|---------|---------|
| 1     | 18.164    | 4159076 | 97.883  |
| 2     | 19.375    | 89963   | 2.117   |
| Total |           | 4249040 | 100.000 |

# $^1\text{H}$ NMR

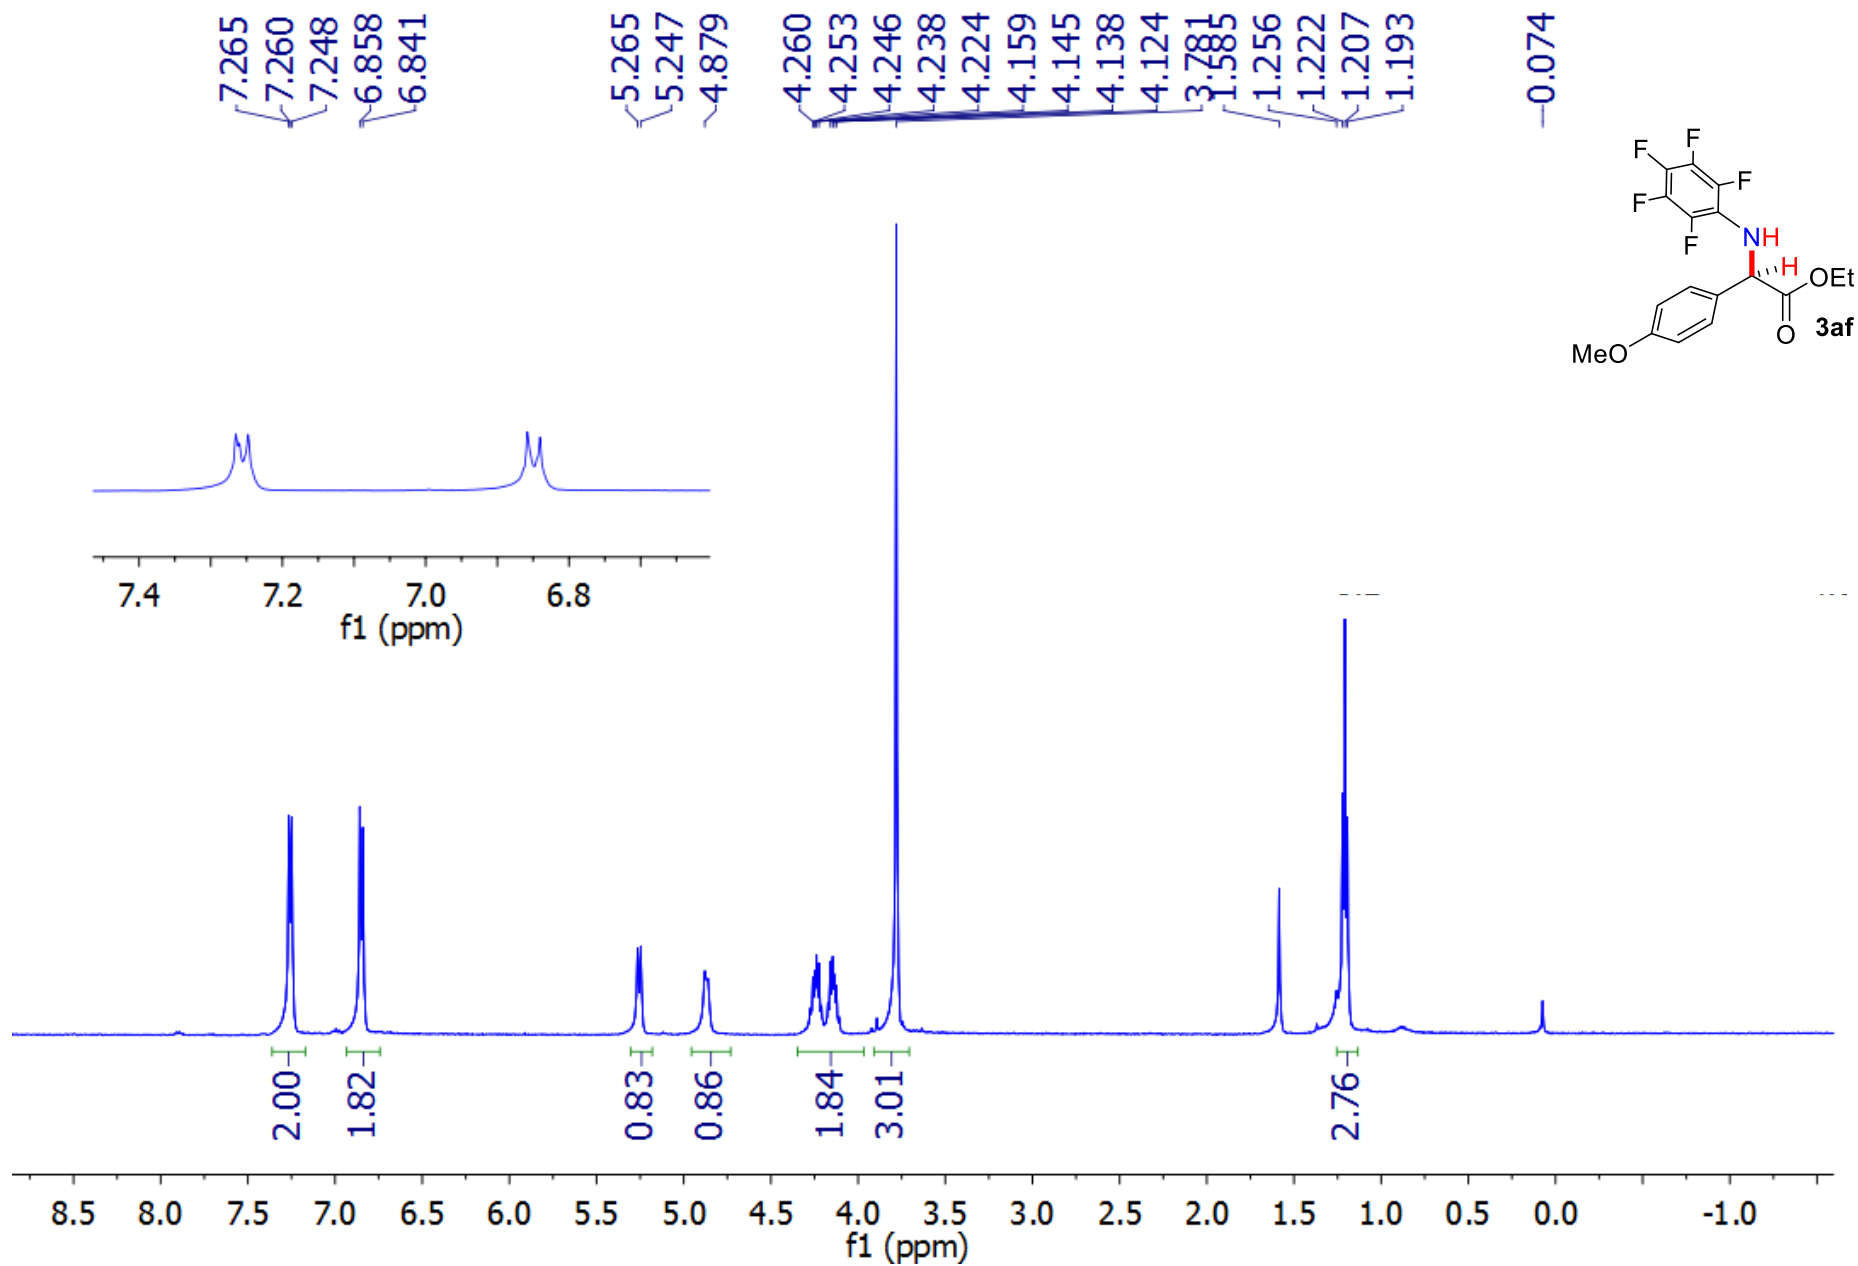

$^{13}\text{C}$  NMR

—171.495  
—159.814  
138.968  
137.346  
136.991  
135.490  
135.198  
133.245  
131.026  
128.859  
128.188  
121.556  
114.347  
77.254  
77.000  
76.745  
62.013  
60.905  
60.876  
60.846  
55.218

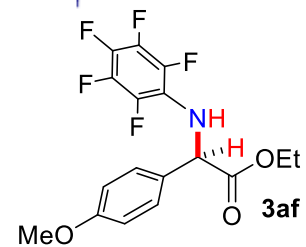

—13.960

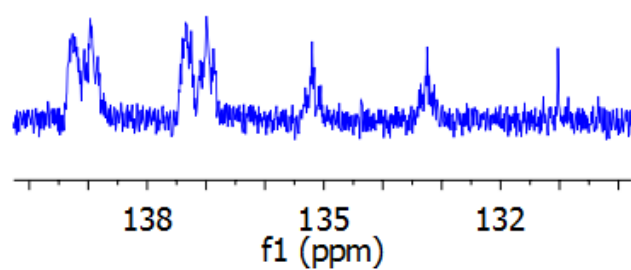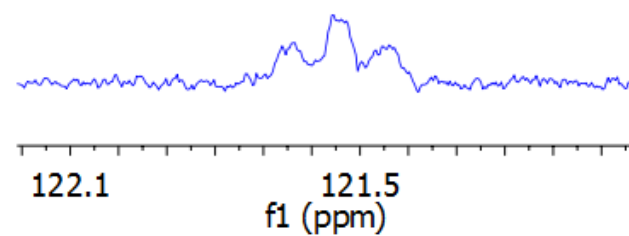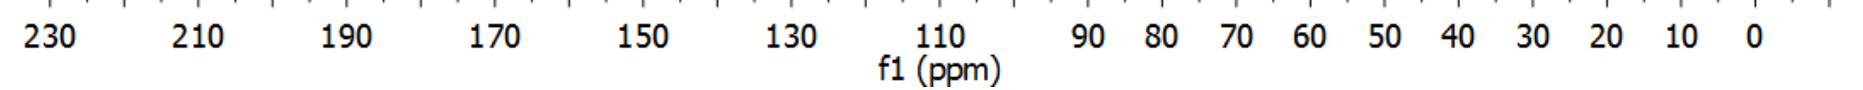

# $^{19}\text{F}$ NMR

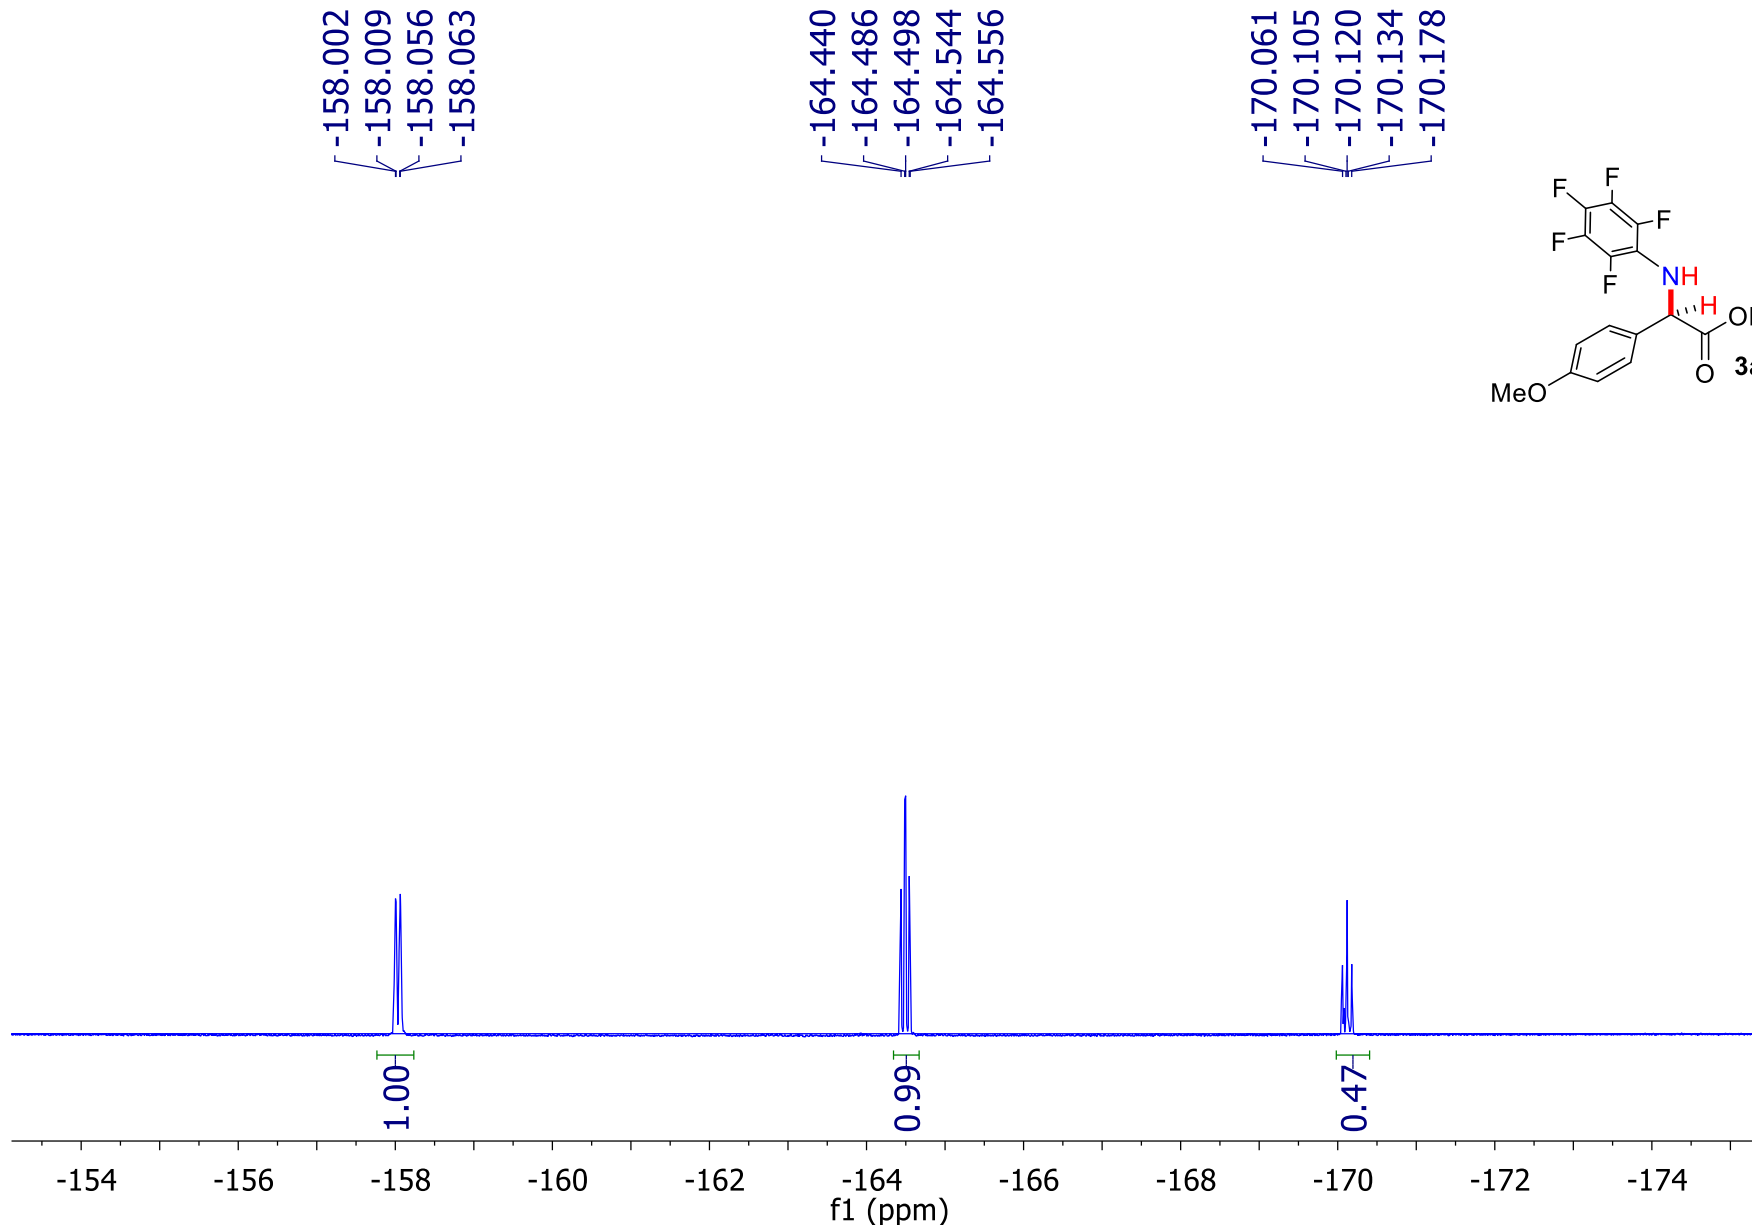

# HPLC

JLM-V-213-1-whe1k-1@1ml

C:\EZStart\Projects\Default\Method\SMJ.met

C:\EZStart\Projects\Default\Data\JLM-V-213-1-whe1k-1@1ml

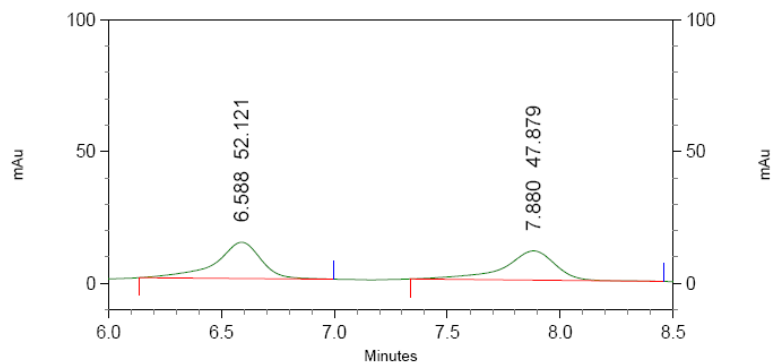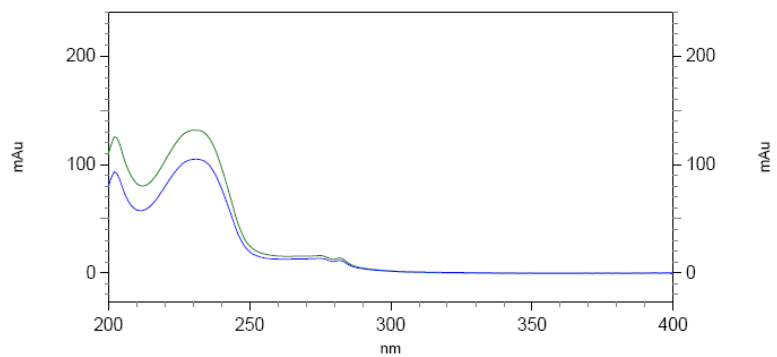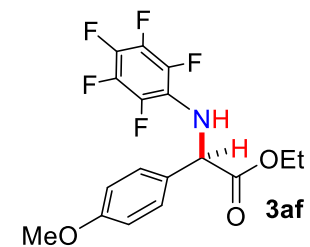

5: 247 nm, 4 nm

Results

| Name | Retention Time | Area Percent | Pk # |
|------|----------------|--------------|------|
|      | 6.588          | 52.121       | 1    |
|      | 7.880          | 47.879       | 2    |

|        |         |  |
|--------|---------|--|
| Totals | 100.000 |  |
|--------|---------|--|

# HPLC

JLM-V-213-2-whelk-1@1ml

C:\EZStart\Projects\Default\Method\SMJ.met

C:\EZStart\Projects\Default\Data\JLM-V-213-2-whelk-1@1ml

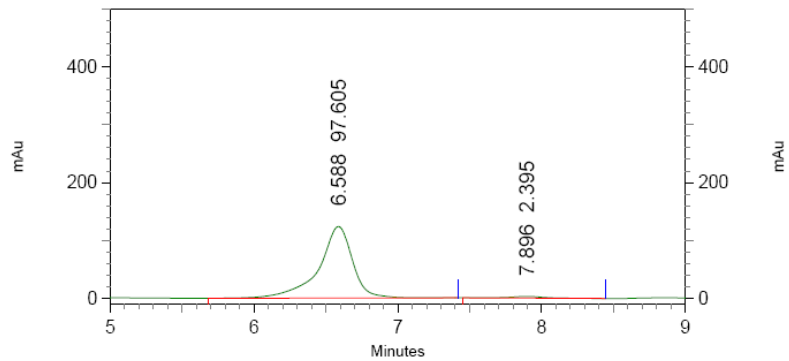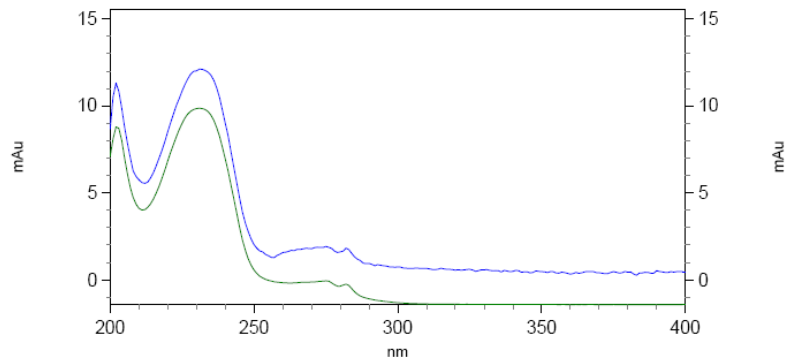

1: 236 nm, 4 nm

Results

| Name | Retention Time | Area Percent | Pk # |
|------|----------------|--------------|------|
|      | 6.588          | 97.605       | 1    |
|      | 7.896          | 2.395        | 2    |

|        |         |  |
|--------|---------|--|
| Totals | 100.000 |  |
|--------|---------|--|

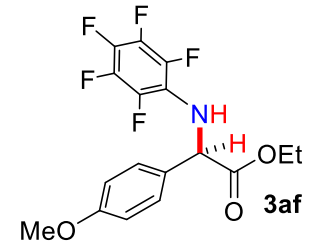



# <sup>1</sup>H NMR

7.284  
7.267  
7.260  
6.868  
6.852

5.351  
5.334  
5.142  
5.125  
4.268  
4.254  
4.247  
4.233  
4.164  
4.150  
4.142  
4.130  
4.128  
3.786  
3.785

1.225  
1.213  
1.211  
1.197

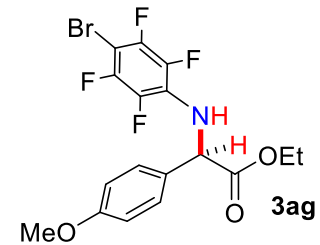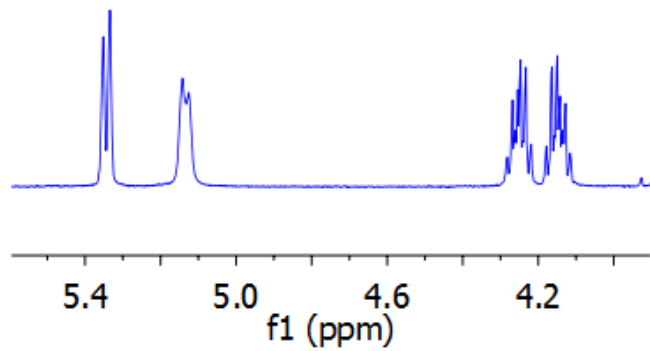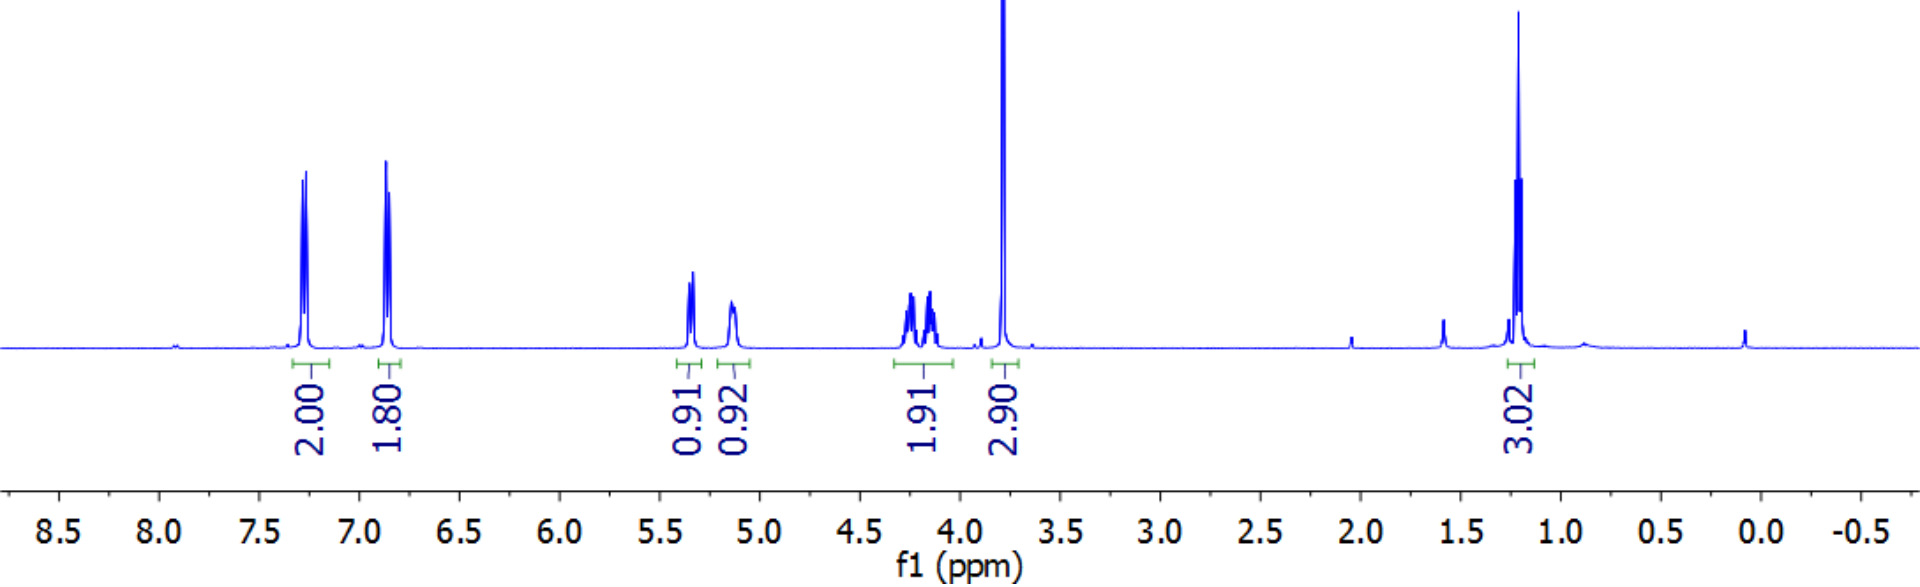

<sup>13</sup>C NMR

171.353  
159.840  
146.108  
145.997  
144.164  
144.053  
137.112  
128.911  
128.175  
125.337  
124.372

87.091  
86.907  
86.724  
77.255  
77.000  
76.746  
62.072  
60.534  
60.503  
60.471  
55.222

13.960

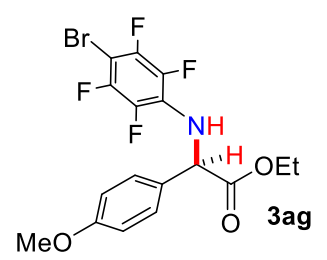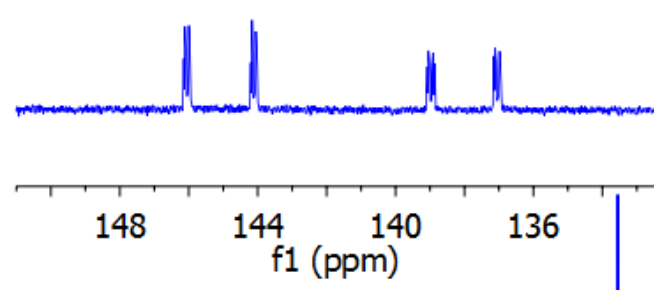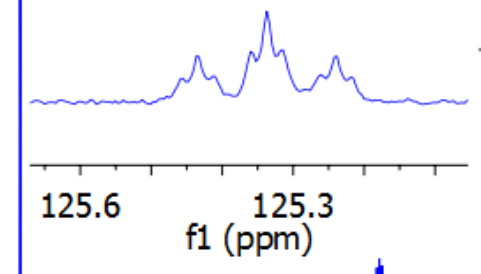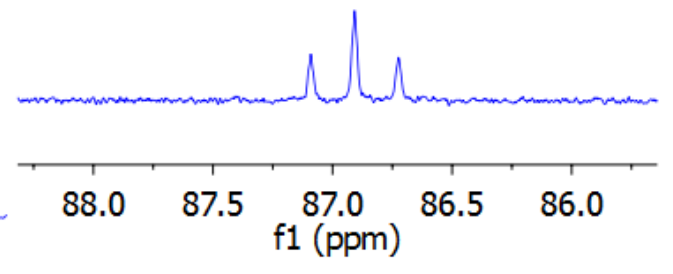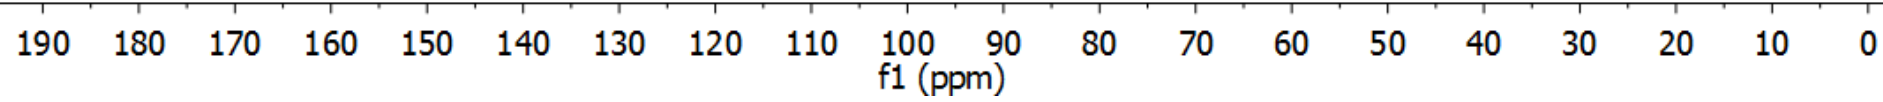

# $^{19}\text{F}$ NMR

-136.117  
-136.129  
-136.138  
-136.146  
-136.188  
-136.196  
-136.206  
-136.218  
-156.731  
-156.736  
-156.780  
-156.785

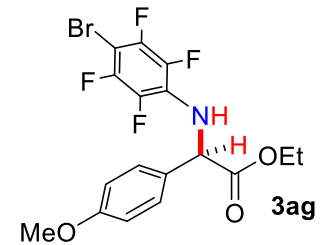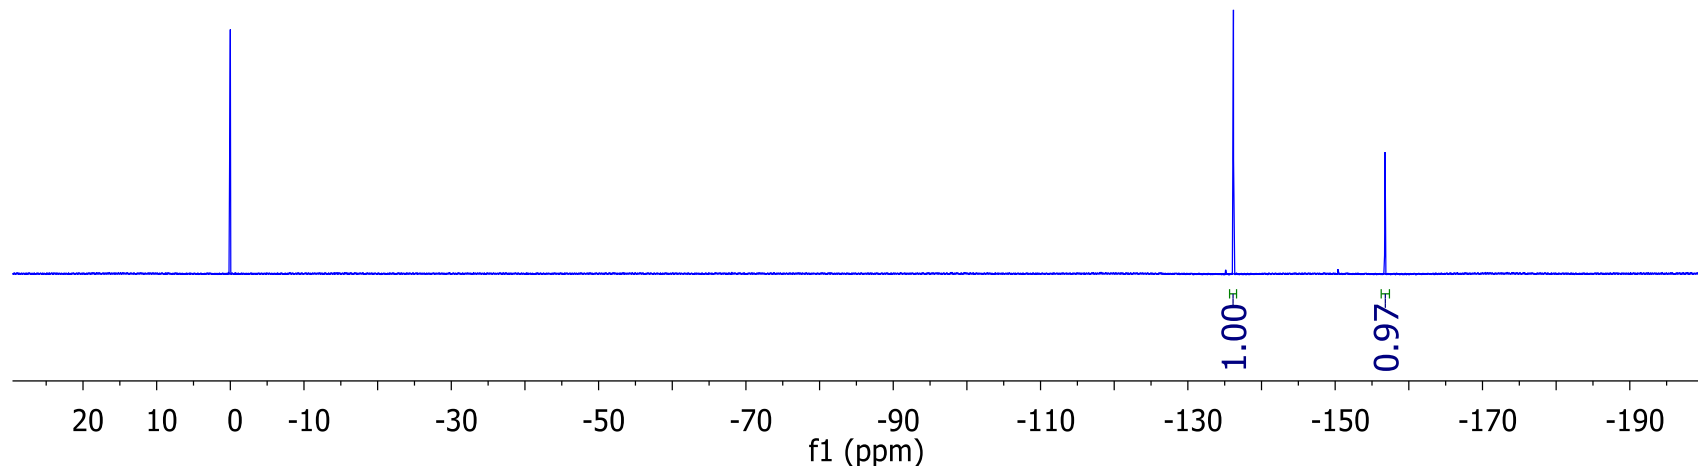

# HPLC

JLM-V-206-1-ADH-1%1ML

C:\EZStart\Projects\Default\Method\shifatest\_2,5-dimehoxy.met

C:\EZStart\Projects\Default\Data\JLM-V-206-1-ADH1%1ML

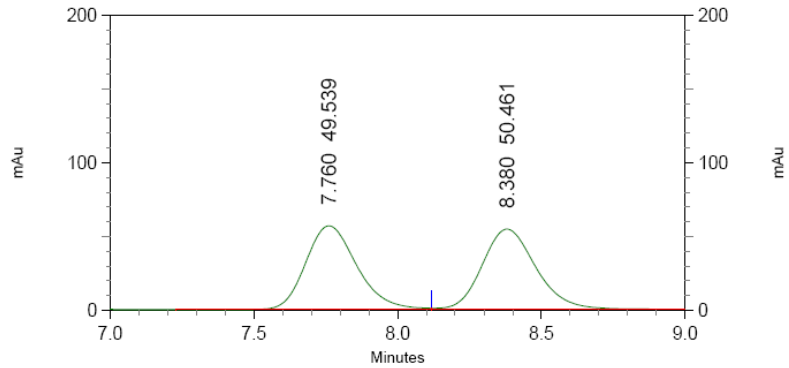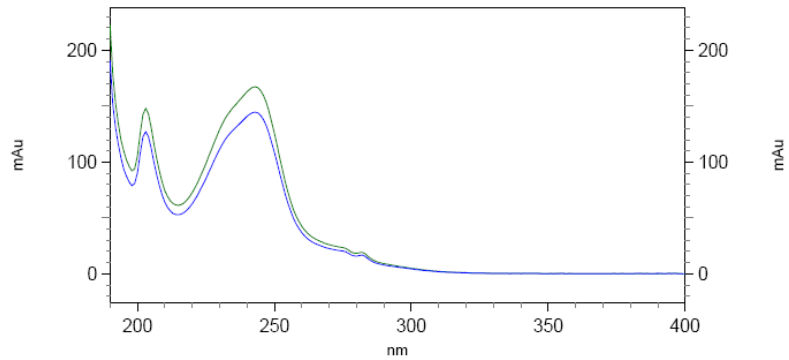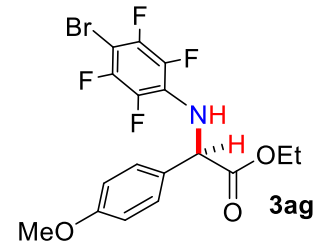

7: 251 nm, 4 nm

Results

| Pk #   | Name | Retention Time | Area Percent |
|--------|------|----------------|--------------|
| 1      |      | 7.760          | 49.539       |
| 2      |      | 8.380          | 50.461       |
| Totals |      |                | 100.000      |

# HPLC

JLM-V-206-2-ADH-1%1ML

C:\EZStart\Projects\Default\Method\shifatest\_2,5-dimehoxy.met

C:\EZStart\Projects\Default\Data\JLM-V-206-2-ADH1%1ML

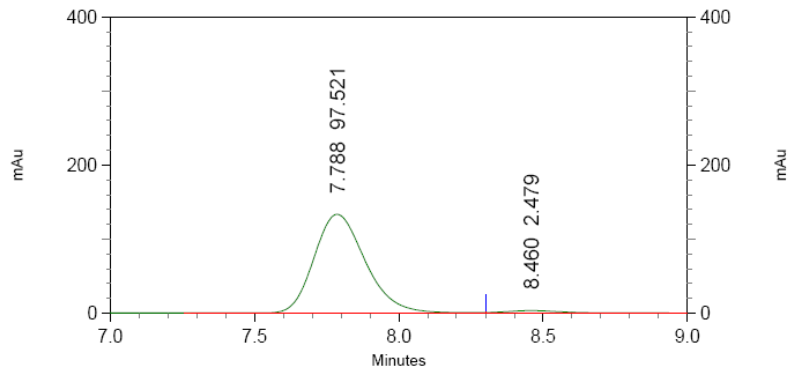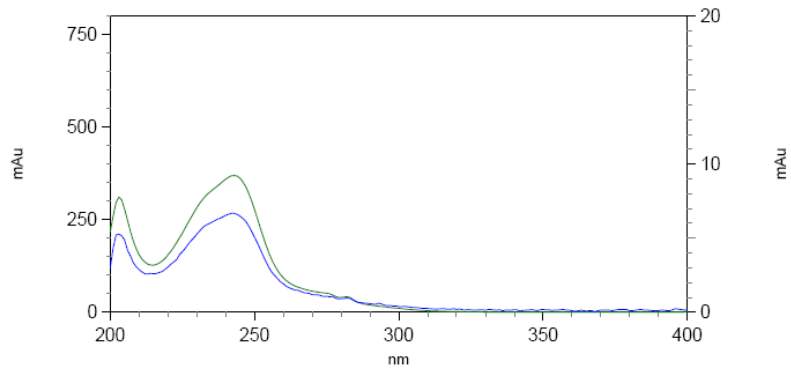

7: 238 nm, 4 nm

Results

| Pk #   | Name | Retention Time | Area Percent |
|--------|------|----------------|--------------|
| 1      |      | 7.788          | 97.521       |
| 2      |      | 8.460          | 2.479        |
| Totals |      |                | 100.000      |

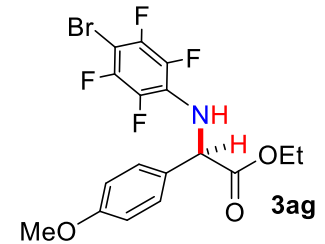

<sup>1</sup>H NMR

7.304  
7.286  
7.260  
6.901  
6.884

5.742  
5.479  
5.464  
4.292  
4.284  
4.277  
4.270  
4.256  
4.181  
4.166  
4.159  
4.152  
4.145  
4.131  
3.799

1.233  
1.219  
1.204

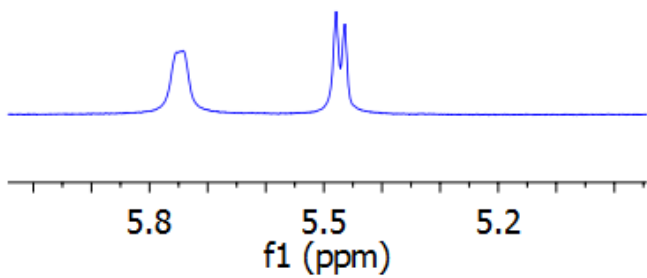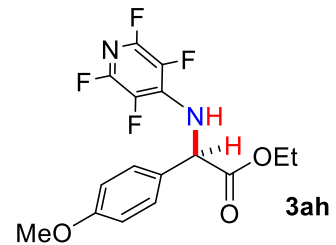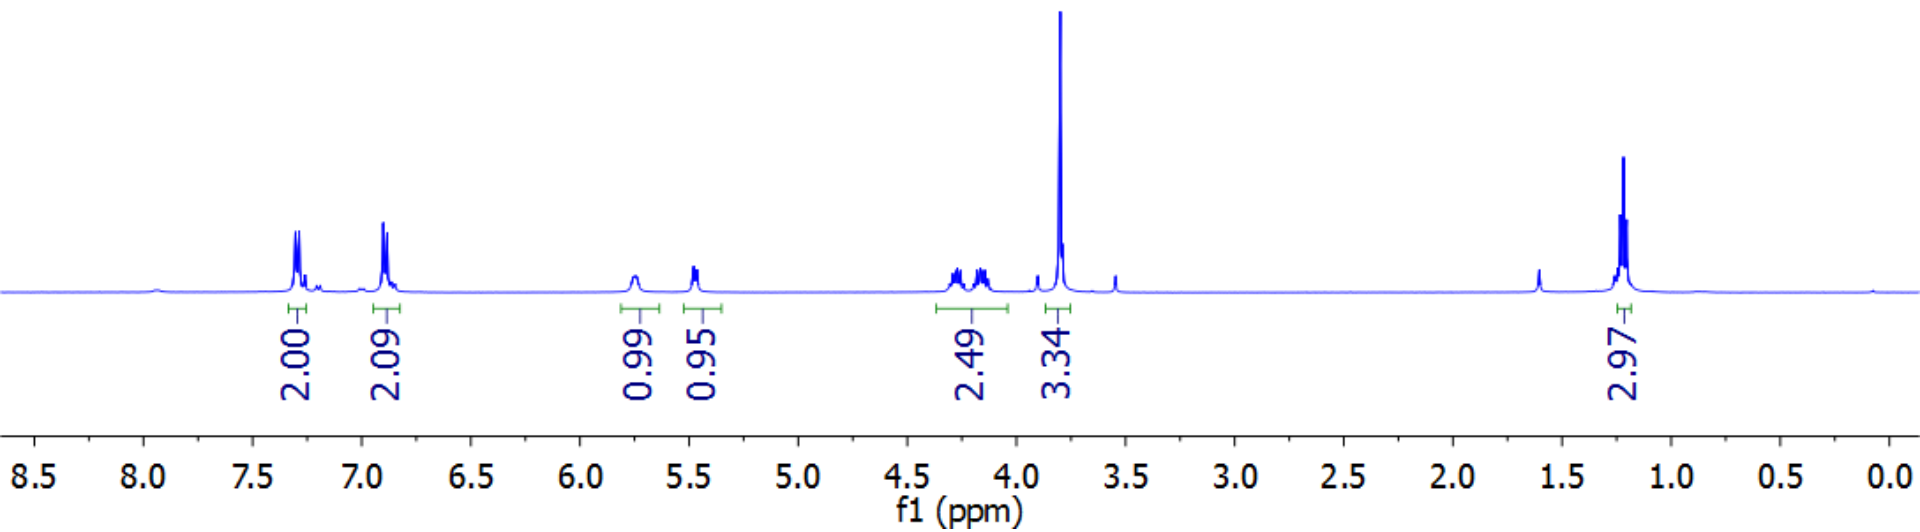

<sup>13</sup>C NMR

-170.688  
-160.068  
144.994  
143.101  
135.757  
130.215  
128.384  
128.139  
114.539  
114.386  
113.939  
  
77.254  
77.000  
76.746  
  
62.448  
59.607  
59.578  
55.275  
40.494  
  
14.155  
13.929  
13.812

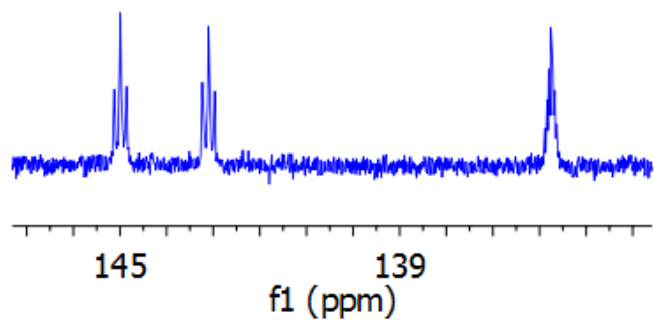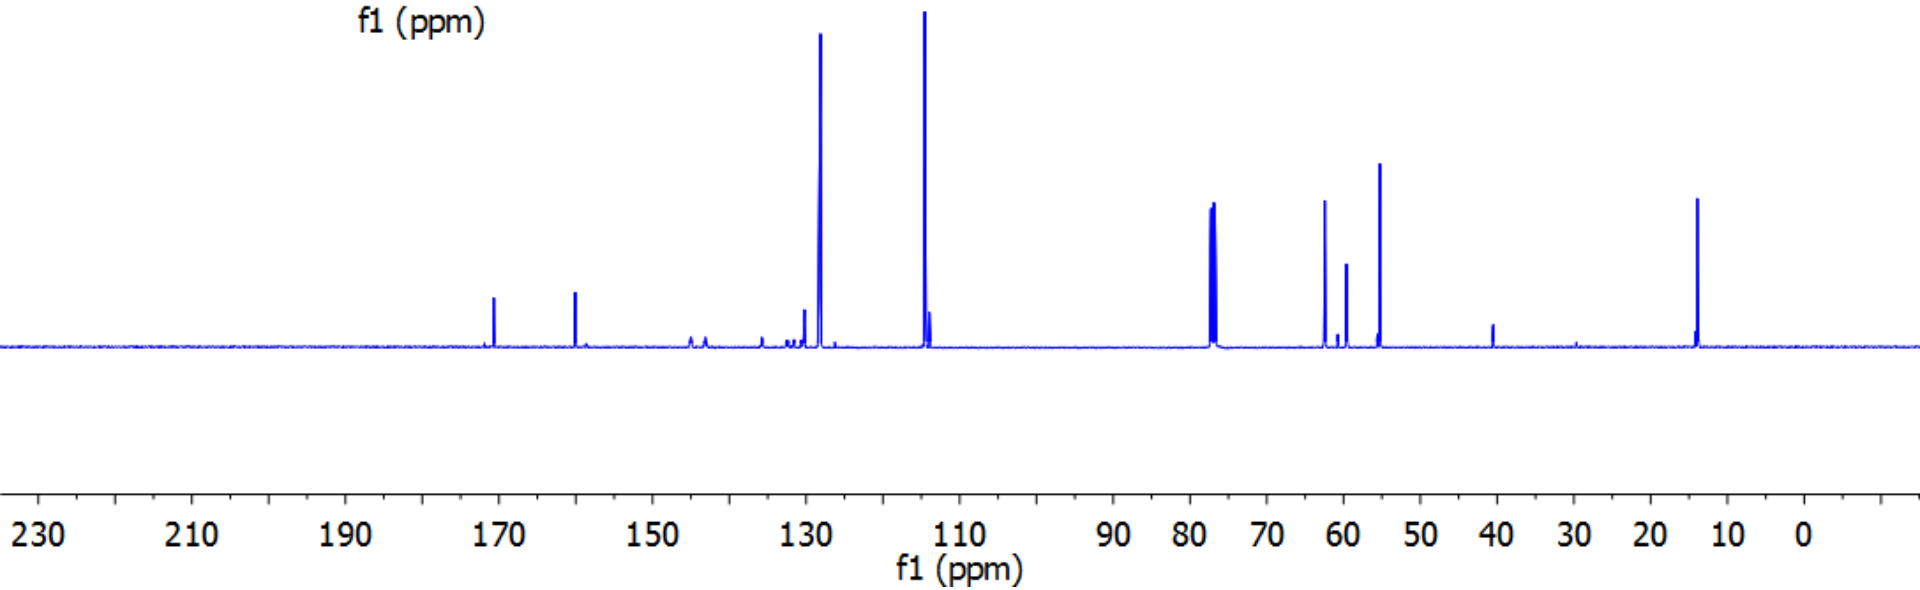

# $^{19}\text{F}$ NMR

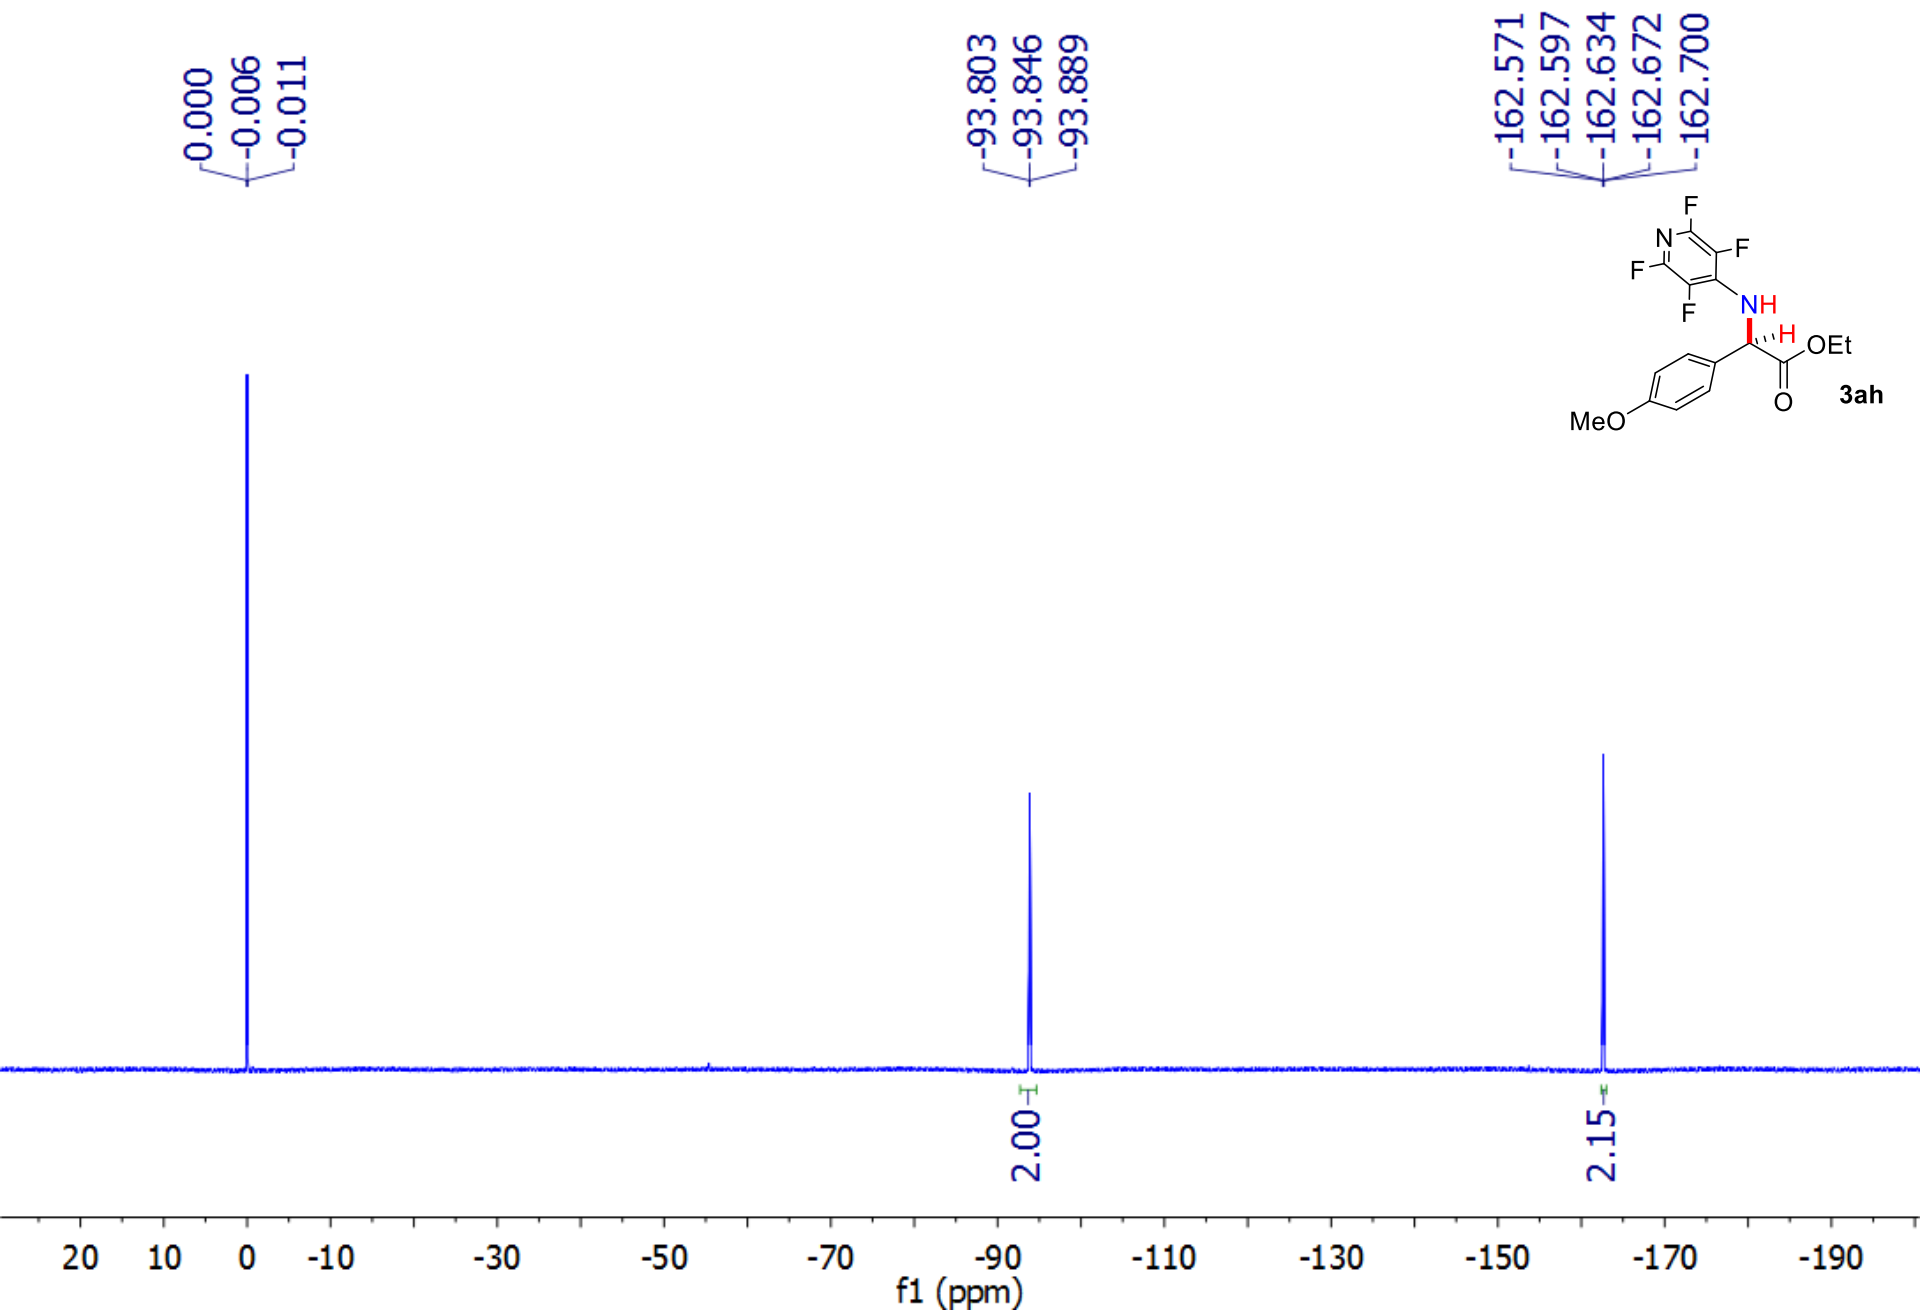



# HPLC

JLM-V-174-2-WHELK-3%1ML

C:\EZStart\Projects\Default\Method\XC-5%-ADH1ml.met

E:\JLM-V-174-2-WHELK3%1ML

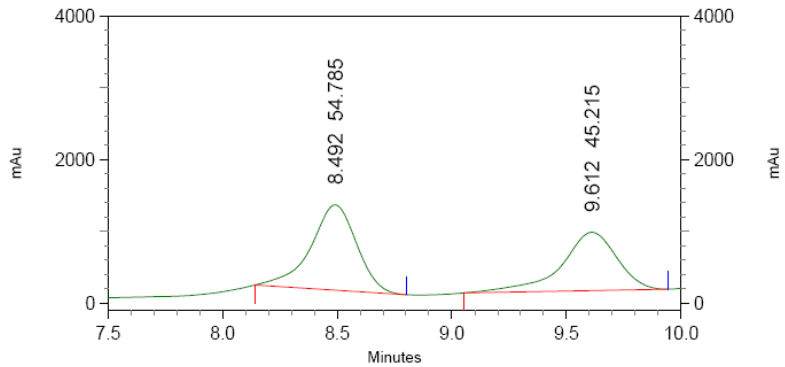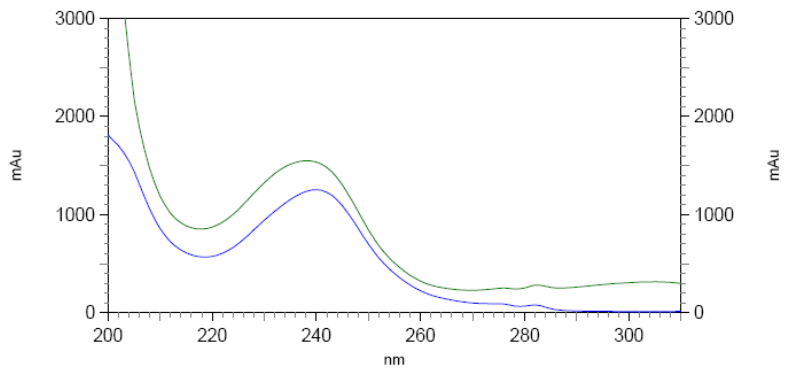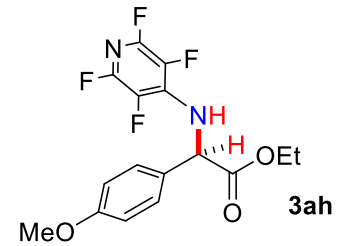

4: 231 nm, 4 nm

Results

| Name | Retention Time | Area Percent | Pk # |
|------|----------------|--------------|------|
|      | 8.492          | 54.785       | 1    |
|      | 9.612          | 45.215       | 2    |

|        |  |         |  |
|--------|--|---------|--|
| Totals |  | 100.000 |  |
|--------|--|---------|--|

# HPLC

JLM-V-174-1-WHELK-3%1ML

C:\EZStart\Projects\Default\Method\XC-5%-ADH1ml.met

E:\JLM-V-174-1-WHELK3%1ML

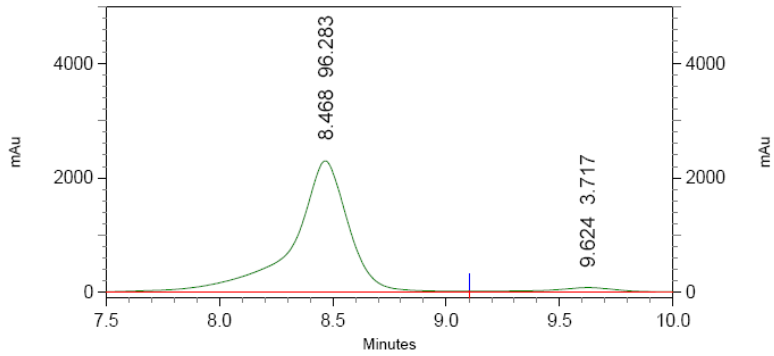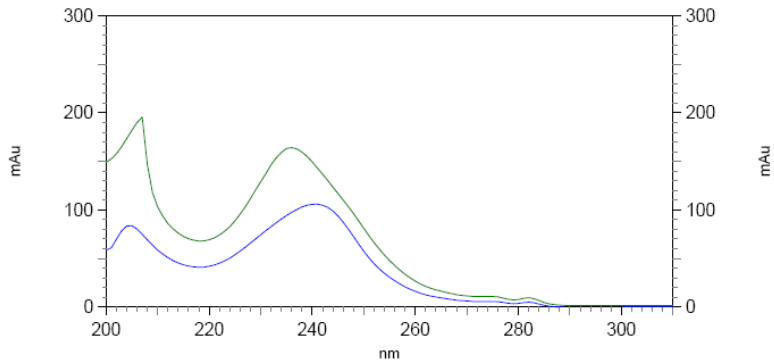

4: 231 nm, 4 nm

Results

| Name | Retention Time | Area Percent | Pk # |
|------|----------------|--------------|------|
|      | 8.468          | 96.283       | 1    |
|      | 9.624          | 3.717        | 2    |

|        |         |  |
|--------|---------|--|
| Totals | 100.000 |  |
|--------|---------|--|

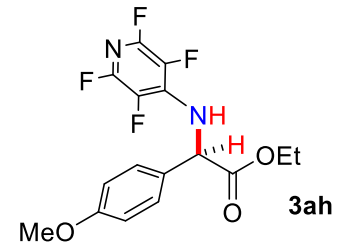

# <sup>1</sup>H NMR

6.867  
6.849  
6.430  
6.415  
6.410  
6.401  
6.395  
6.389  
6.381  
6.375  
6.361  
5.367  
5.349  
5.083  
5.065  
4.264  
4.257  
4.254  
4.250  
4.243  
4.240  
4.236  
4.229  
4.214  
4.176  
4.162  
4.154  
4.147  
4.140  
4.133  
4.126  
3.785

1.225  
1.211  
1.197

5.367  
5.349

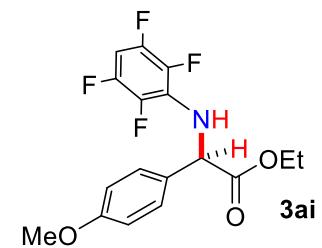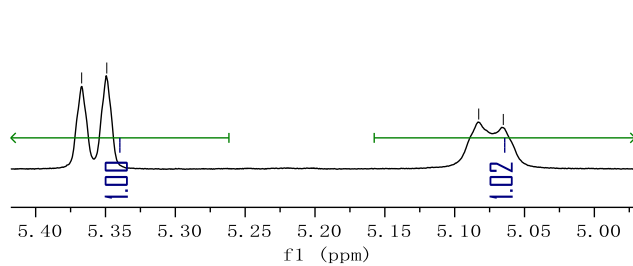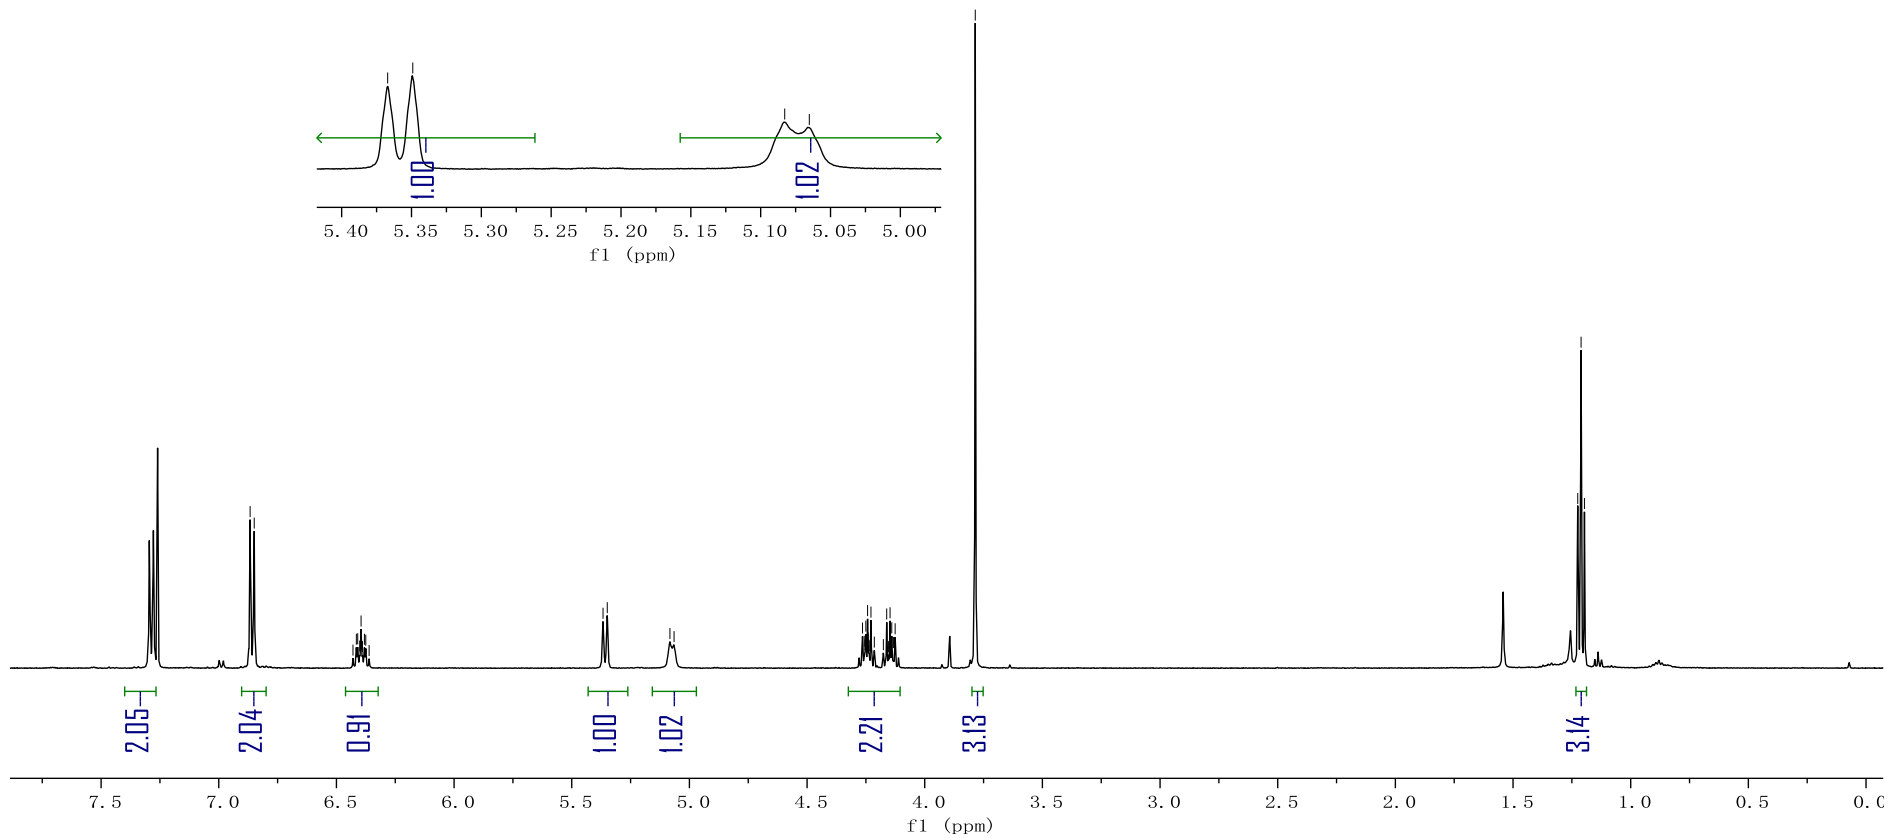

# $^{13}\text{C}$ NMR

171.539  
159.764  
147.294  
145.350  
138.654  
136.745  
131.009  
129.185  
128.209  
126.281  
114.315  
94.861  
94.676  
94.491

77.000  
76.746  
61.968  
60.625  
60.592  
60.559  
55.237

13.982

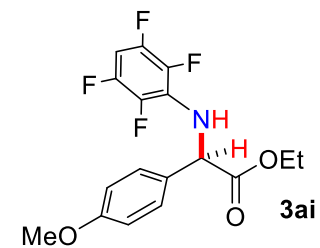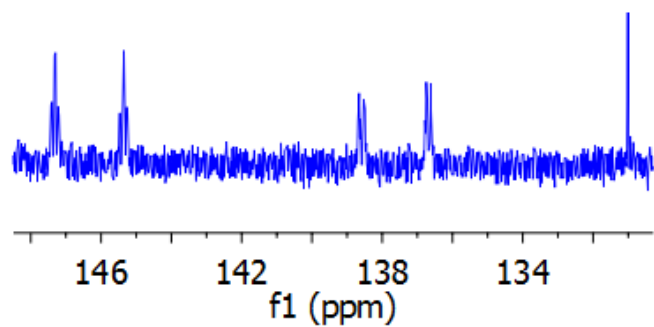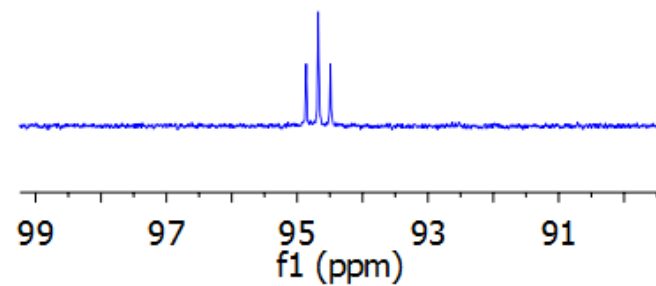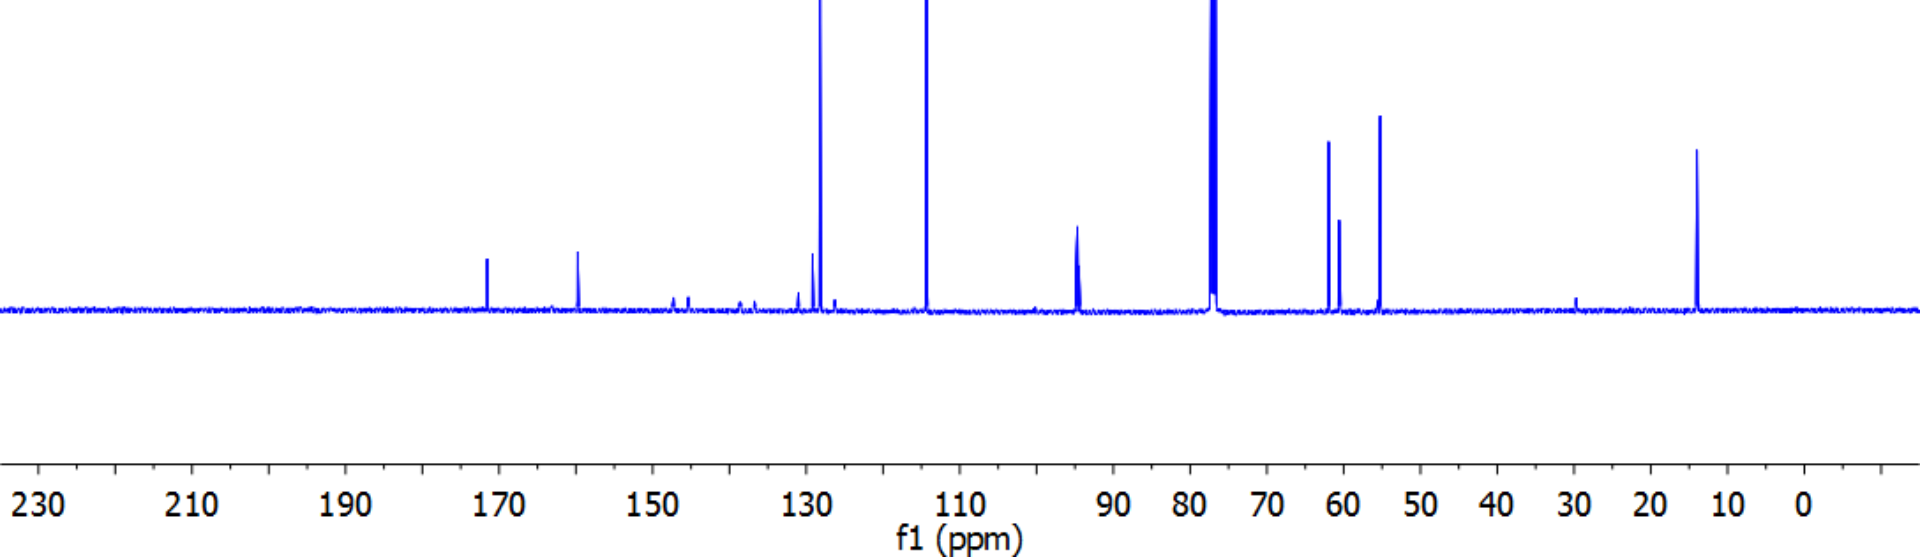

# $^{19}\text{F}$ NMR

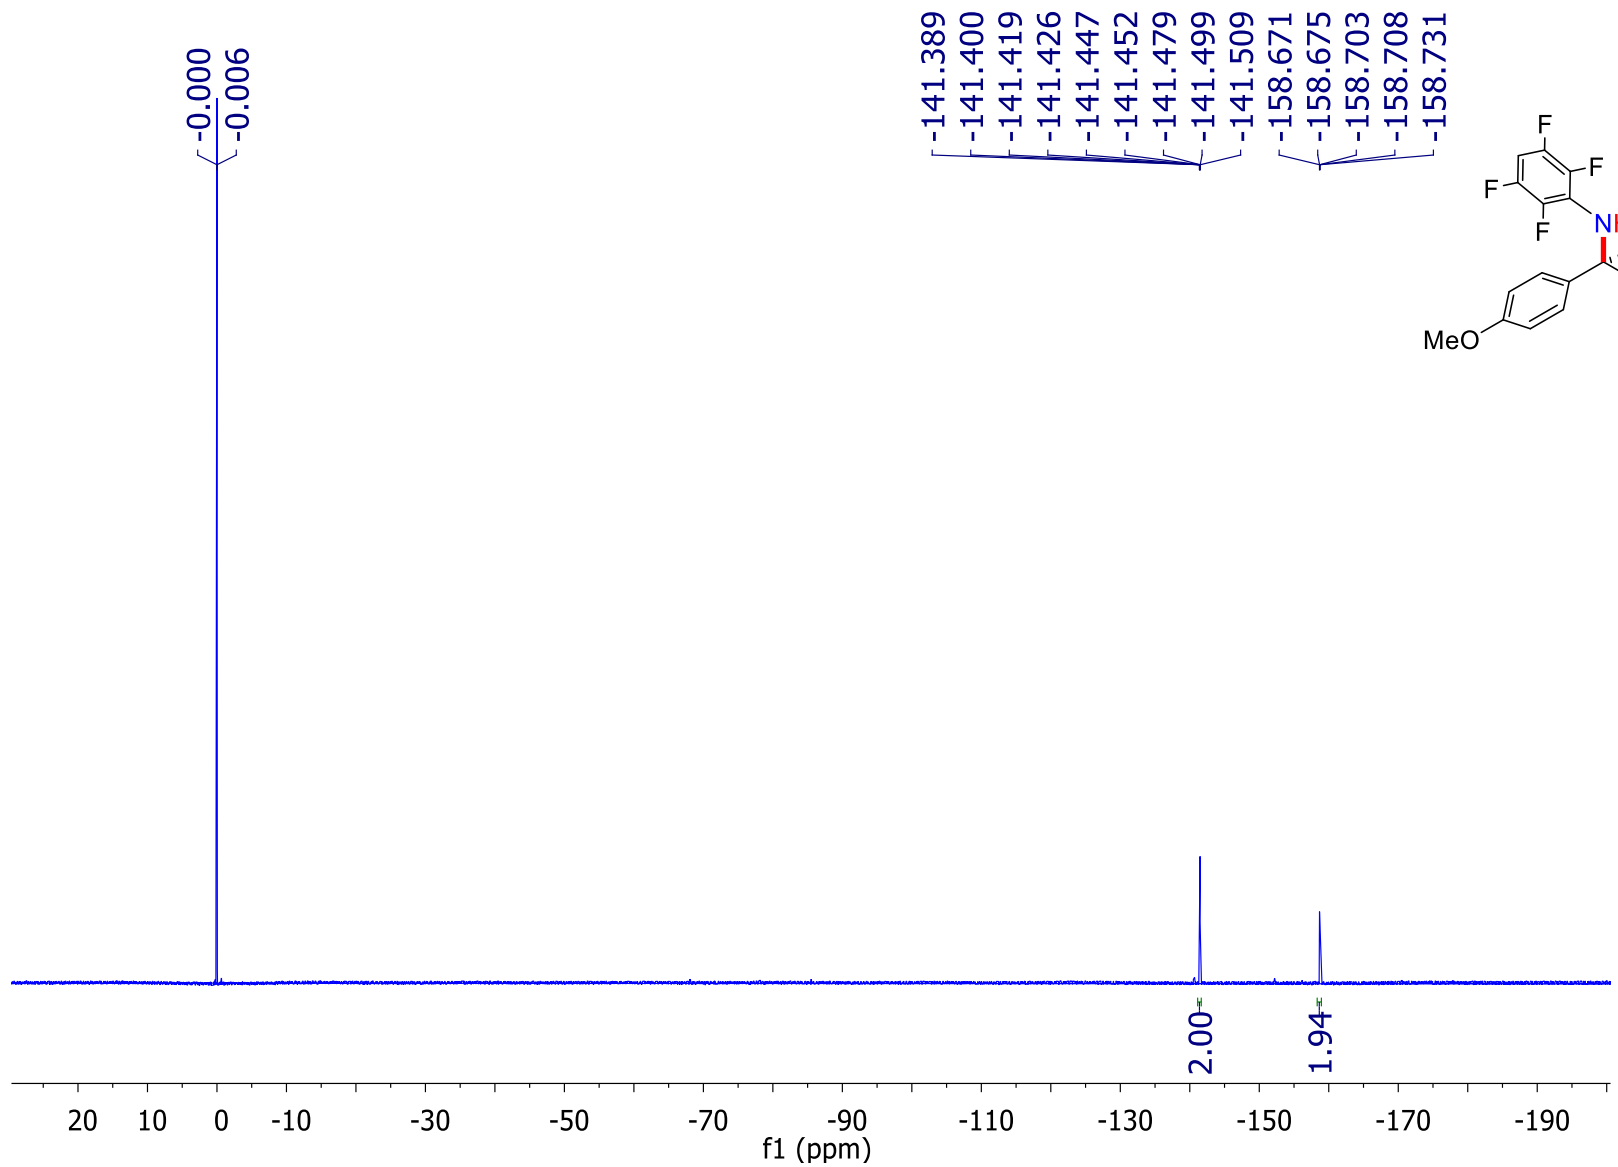

# HPLC

JLM-V-227-1-whe1k-1@1ml  
C:\EZStart\Projects\Default\Data\JLM-V-227-1-whe1k-1@1ml  
C:\EZStart\Projects\Default\Method\CQL-AD-H10%1.0ml60min.met  
AD-H column 20%IPA @ 0.8ml/min

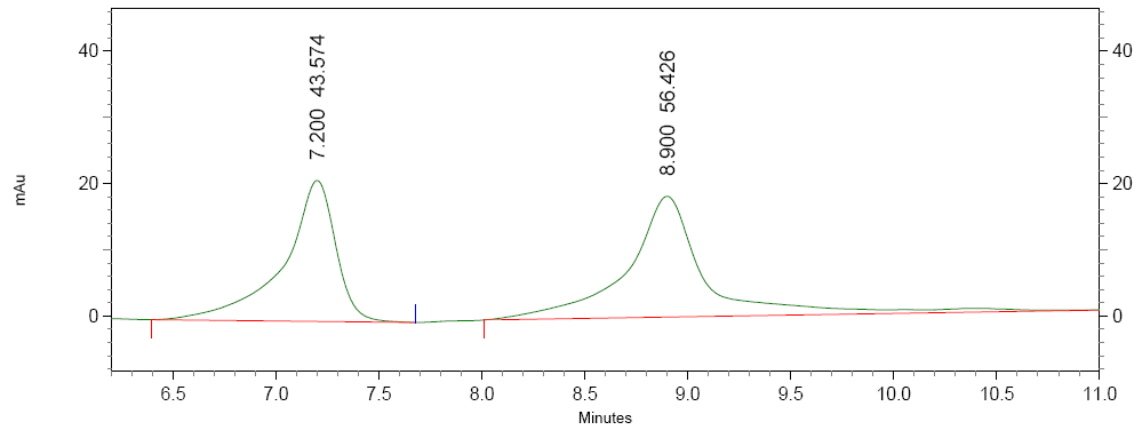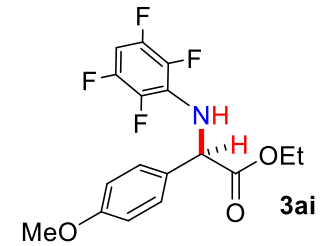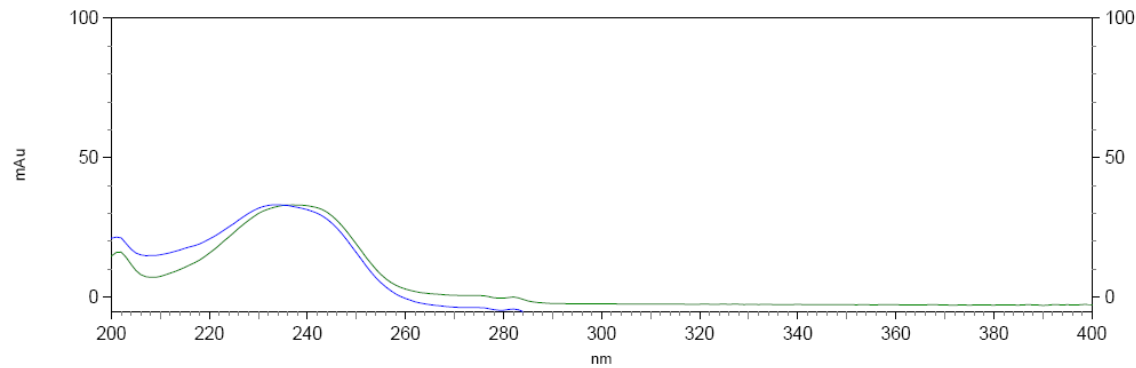

2: 235 nm, 4 nm Results

| Pk #   | Retention Time | Area Percent |
|--------|----------------|--------------|
| 1      | 7.200          | 43.574       |
| 2      | 8.900          | 56.426       |
| Totals |                | 100.000      |

# HPLC

JLM-V-227-2-whelk-1@1ml  
C:\EZStart\Projects\Default\Data\JLM-V-227-2-whelk-1@1ml  
C:\EZStart\Projects\Default\Method\CQL-AD-H10%1.0ml60min.met  
AD-H column 20%IPA @ 0.8ml/min

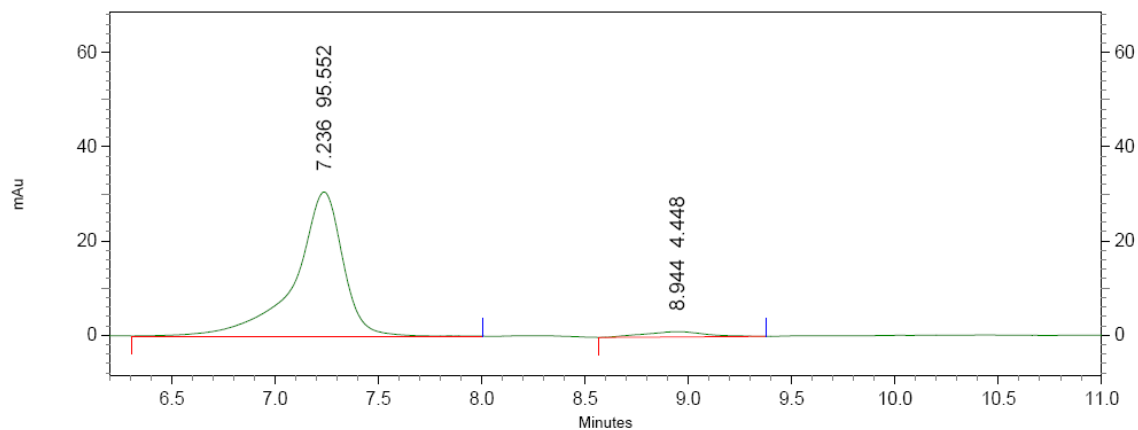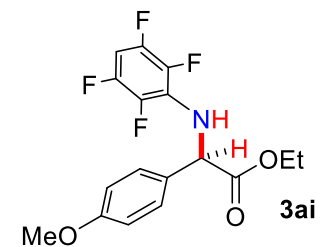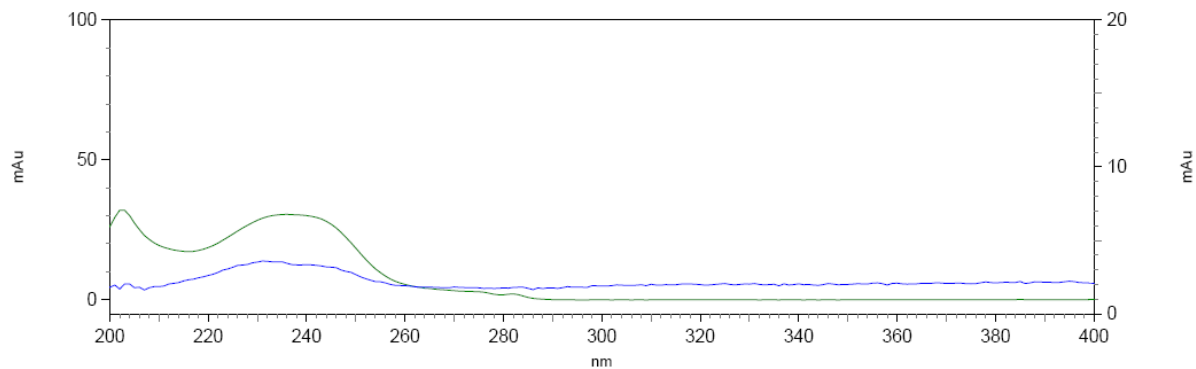

2: 235 nm, 4 nm Results

| Pk #   | Retention Time | Area Percent |
|--------|----------------|--------------|
| 1      | 7.236          | 95.552       |
| 2      | 8.944          | 4.448        |
| Totals |                | 100.000      |

# <sup>1</sup>H NMR

7.284  
7.268  
6.846  
6.829  
6.578  
6.561  
6.547

5.237  
5.220

4.653  
4.634  
4.253  
4.251  
4.248  
4.245  
4.238  
4.234  
4.231  
4.227  
4.216  
4.212  
4.159  
4.155  
4.145  
4.141  
4.137  
4.133  
4.130  
4.123  
4.119  
3.779  
1.222  
1.208  
1.194

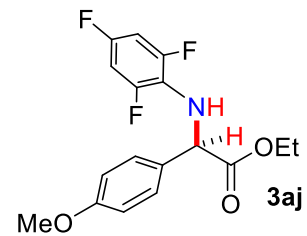

2.28

1.96

1.95

1.00

0.93

2.09

3.18

3.05

8.5 8.0 7.5 7.0 6.5 6.0 5.5 5.0 4.5 4.0 3.5 3.0 2.5 2.0 1.5 1.0 0.5 0.0

f1 (ppm)



# <sup>13</sup>C NMR

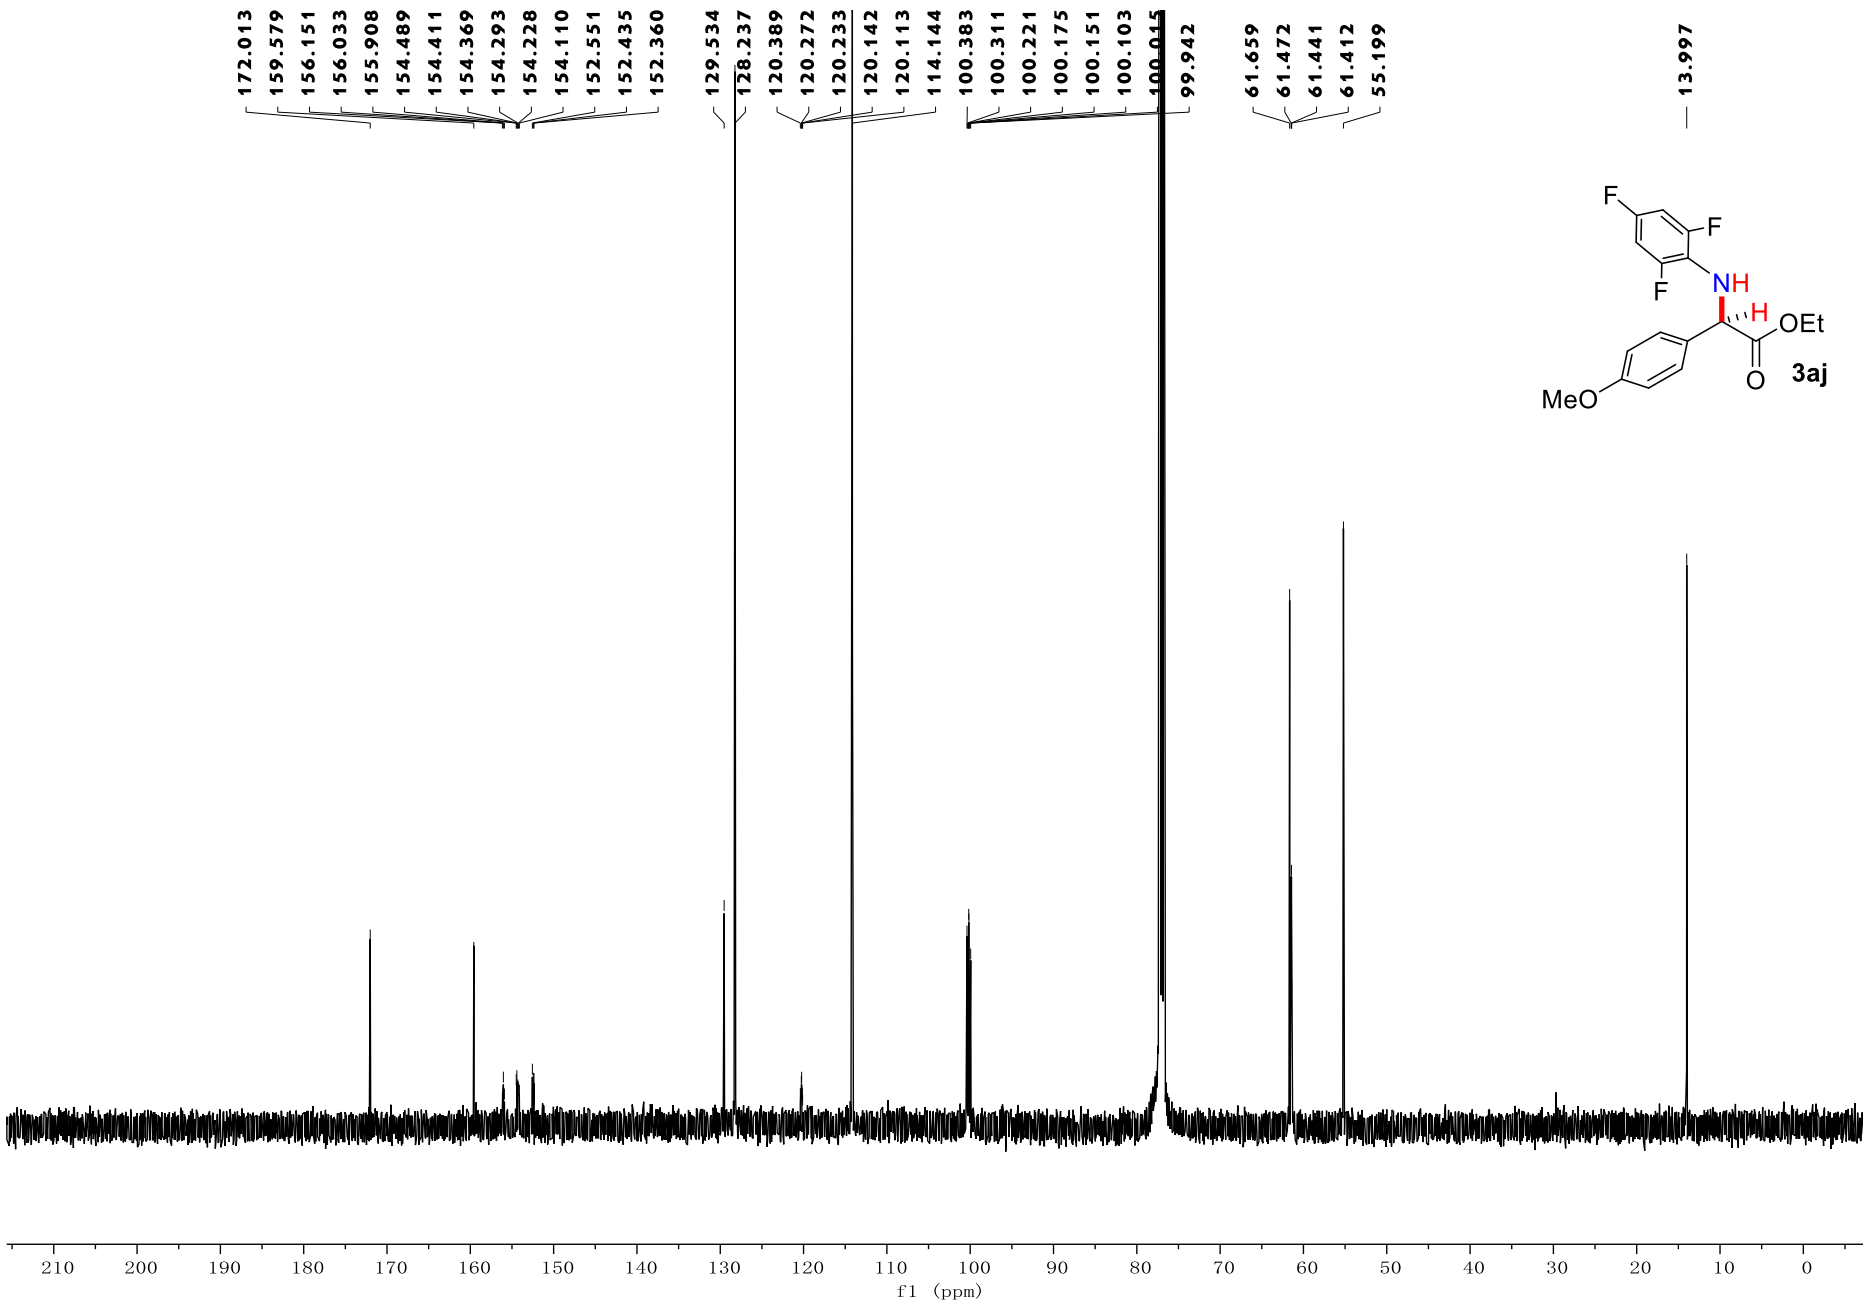

# $^{19}\text{F}$ NMR

-120.440  
-120.459  
-120.477  
-124.188  
-124.206

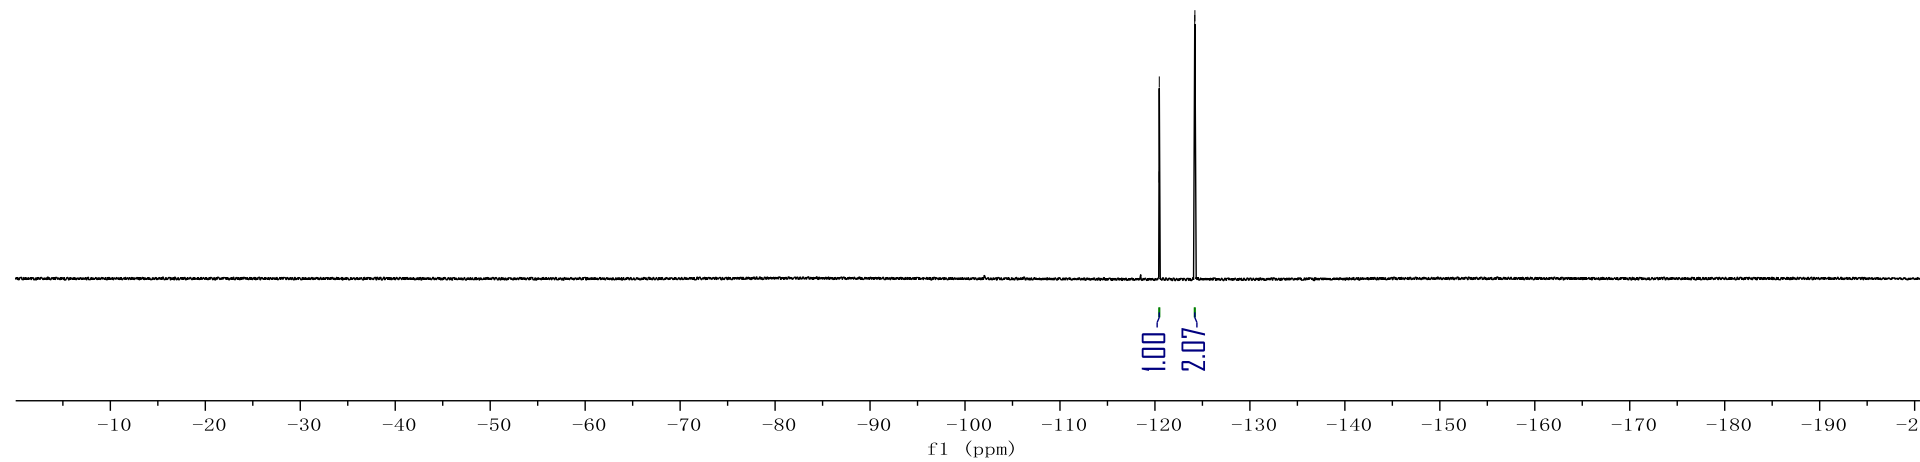

# HPLC

JLM-V-205-1-OJH-1%1ML

C:\EZStart\Projects\Default\Method\XC-5%-ADH1ml.met

E:\JLM-V-205-1-OJH-1%1ML

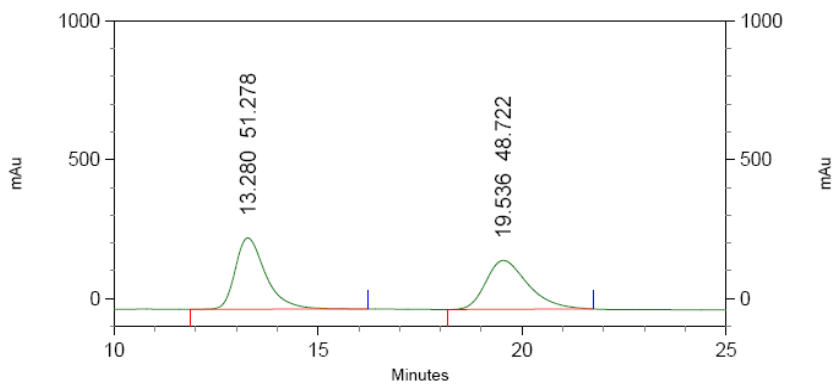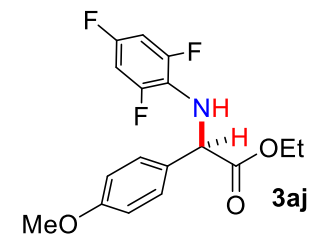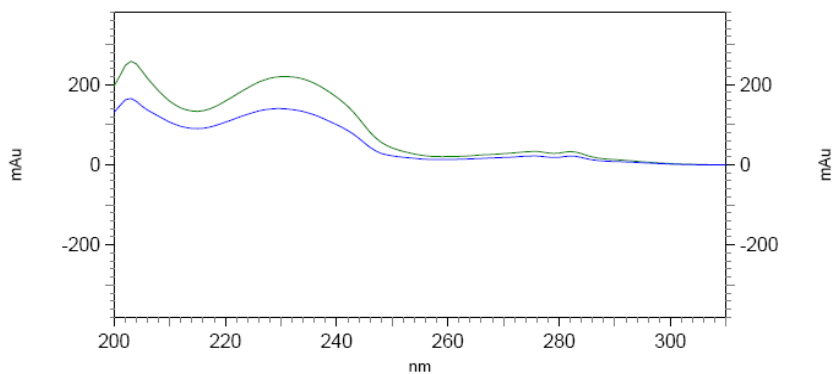

4: 232 nm, 4 nm

Results

| Name | Retention Time | Area Percent | Pk # |
|------|----------------|--------------|------|
|      | 13.280         | 51.278       | 1    |
|      | 19.536         | 48.722       | 2    |

|        |         |  |
|--------|---------|--|
| Totals | 100.000 |  |
|--------|---------|--|

# HPLC

JLM-V-205-2-OJH-1%1ML

C:\EZStart\Projects\Default\Method\XC-5%-ADH1ml.met

E:\JLM-V-205-2-OJH-1%1ML

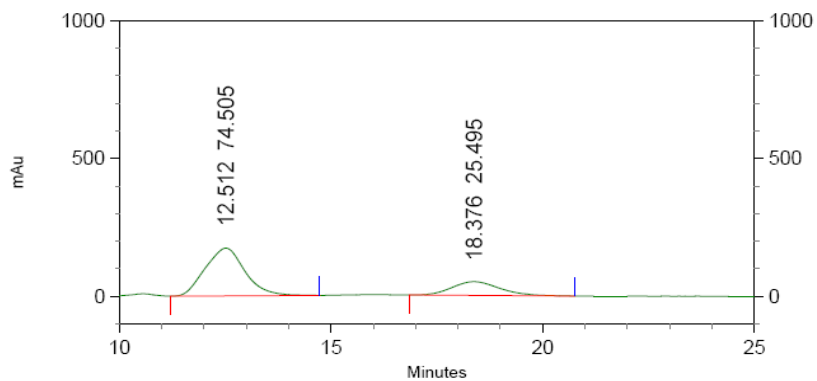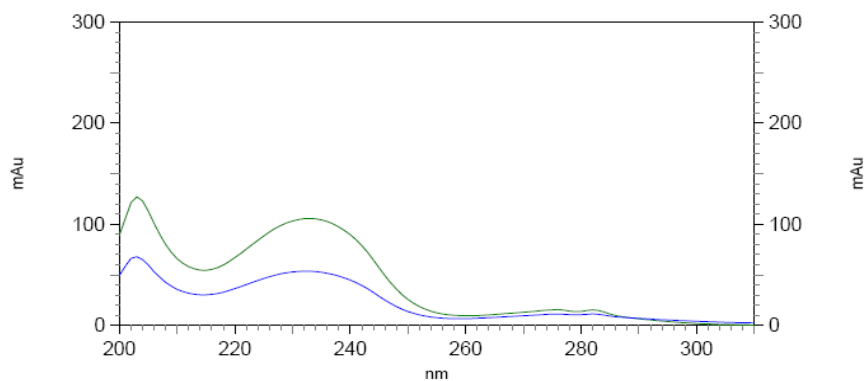

4: 232 nm, 4 nm

Results

| Name | Retention Time | Area Percent | Pk # |
|------|----------------|--------------|------|
|      | 12.512         | 74.505       | 1    |
|      | 18.376         | 25.495       | 2    |

|        |  |         |  |
|--------|--|---------|--|
| Totals |  | 100.000 |  |
|--------|--|---------|--|

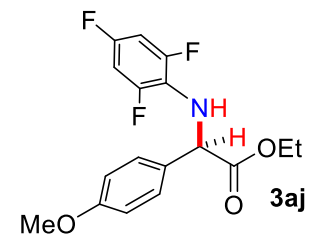

# $^1\text{H}$ NMR

7.374  
7.350  
7.260  
5.511  
5.495  
5.478  
-3.765

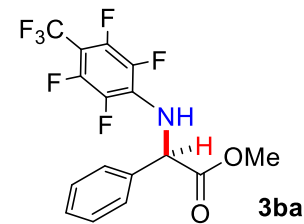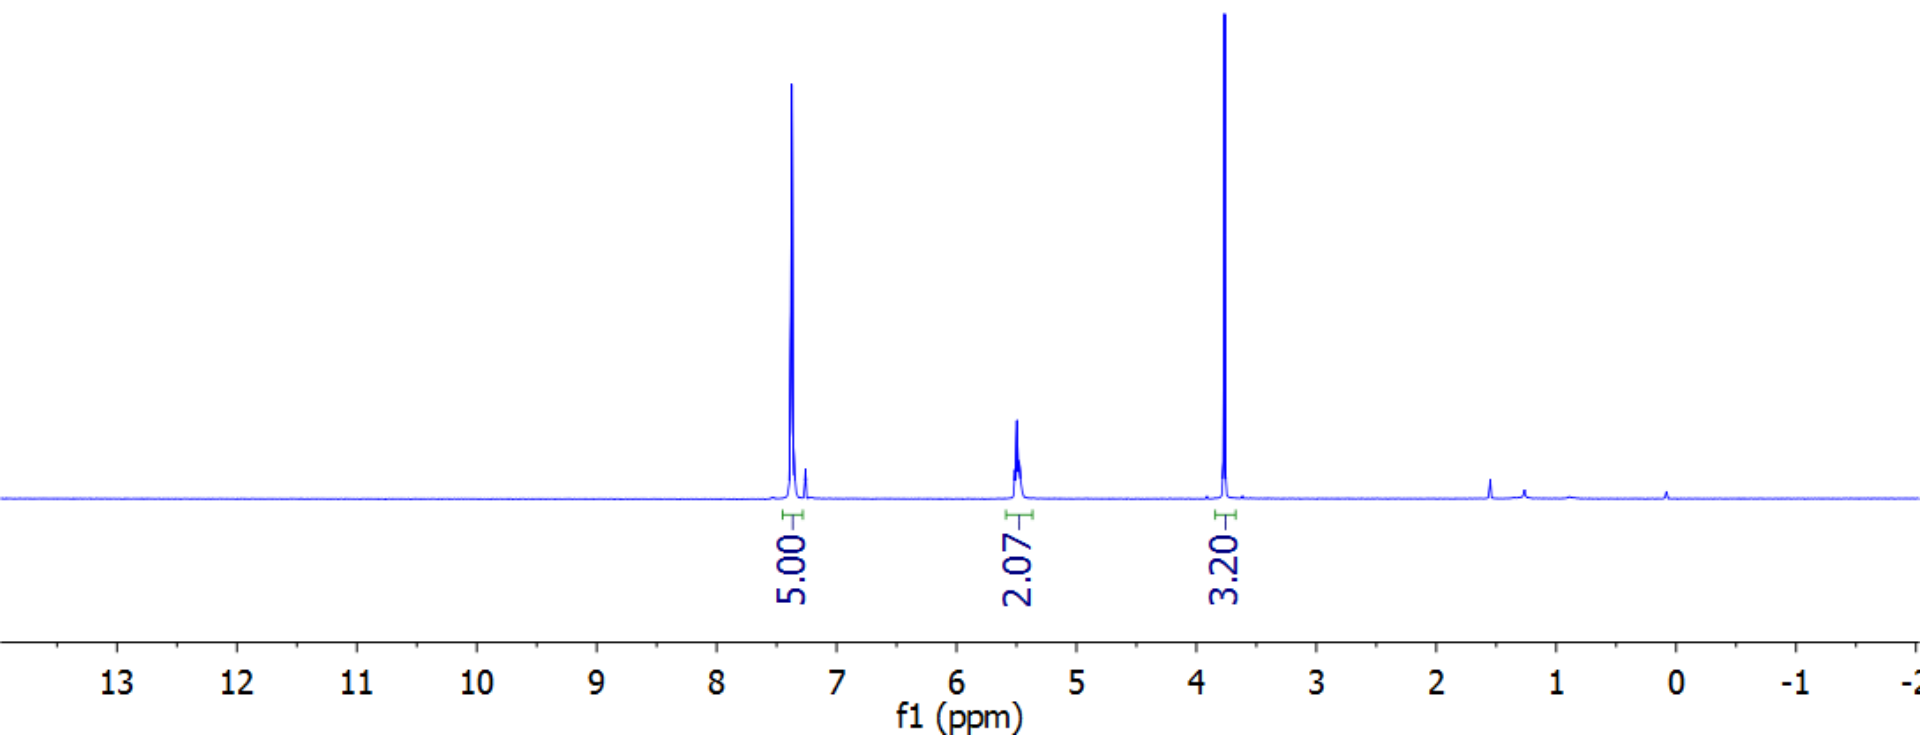

# $^{13}\text{C}$ NMR

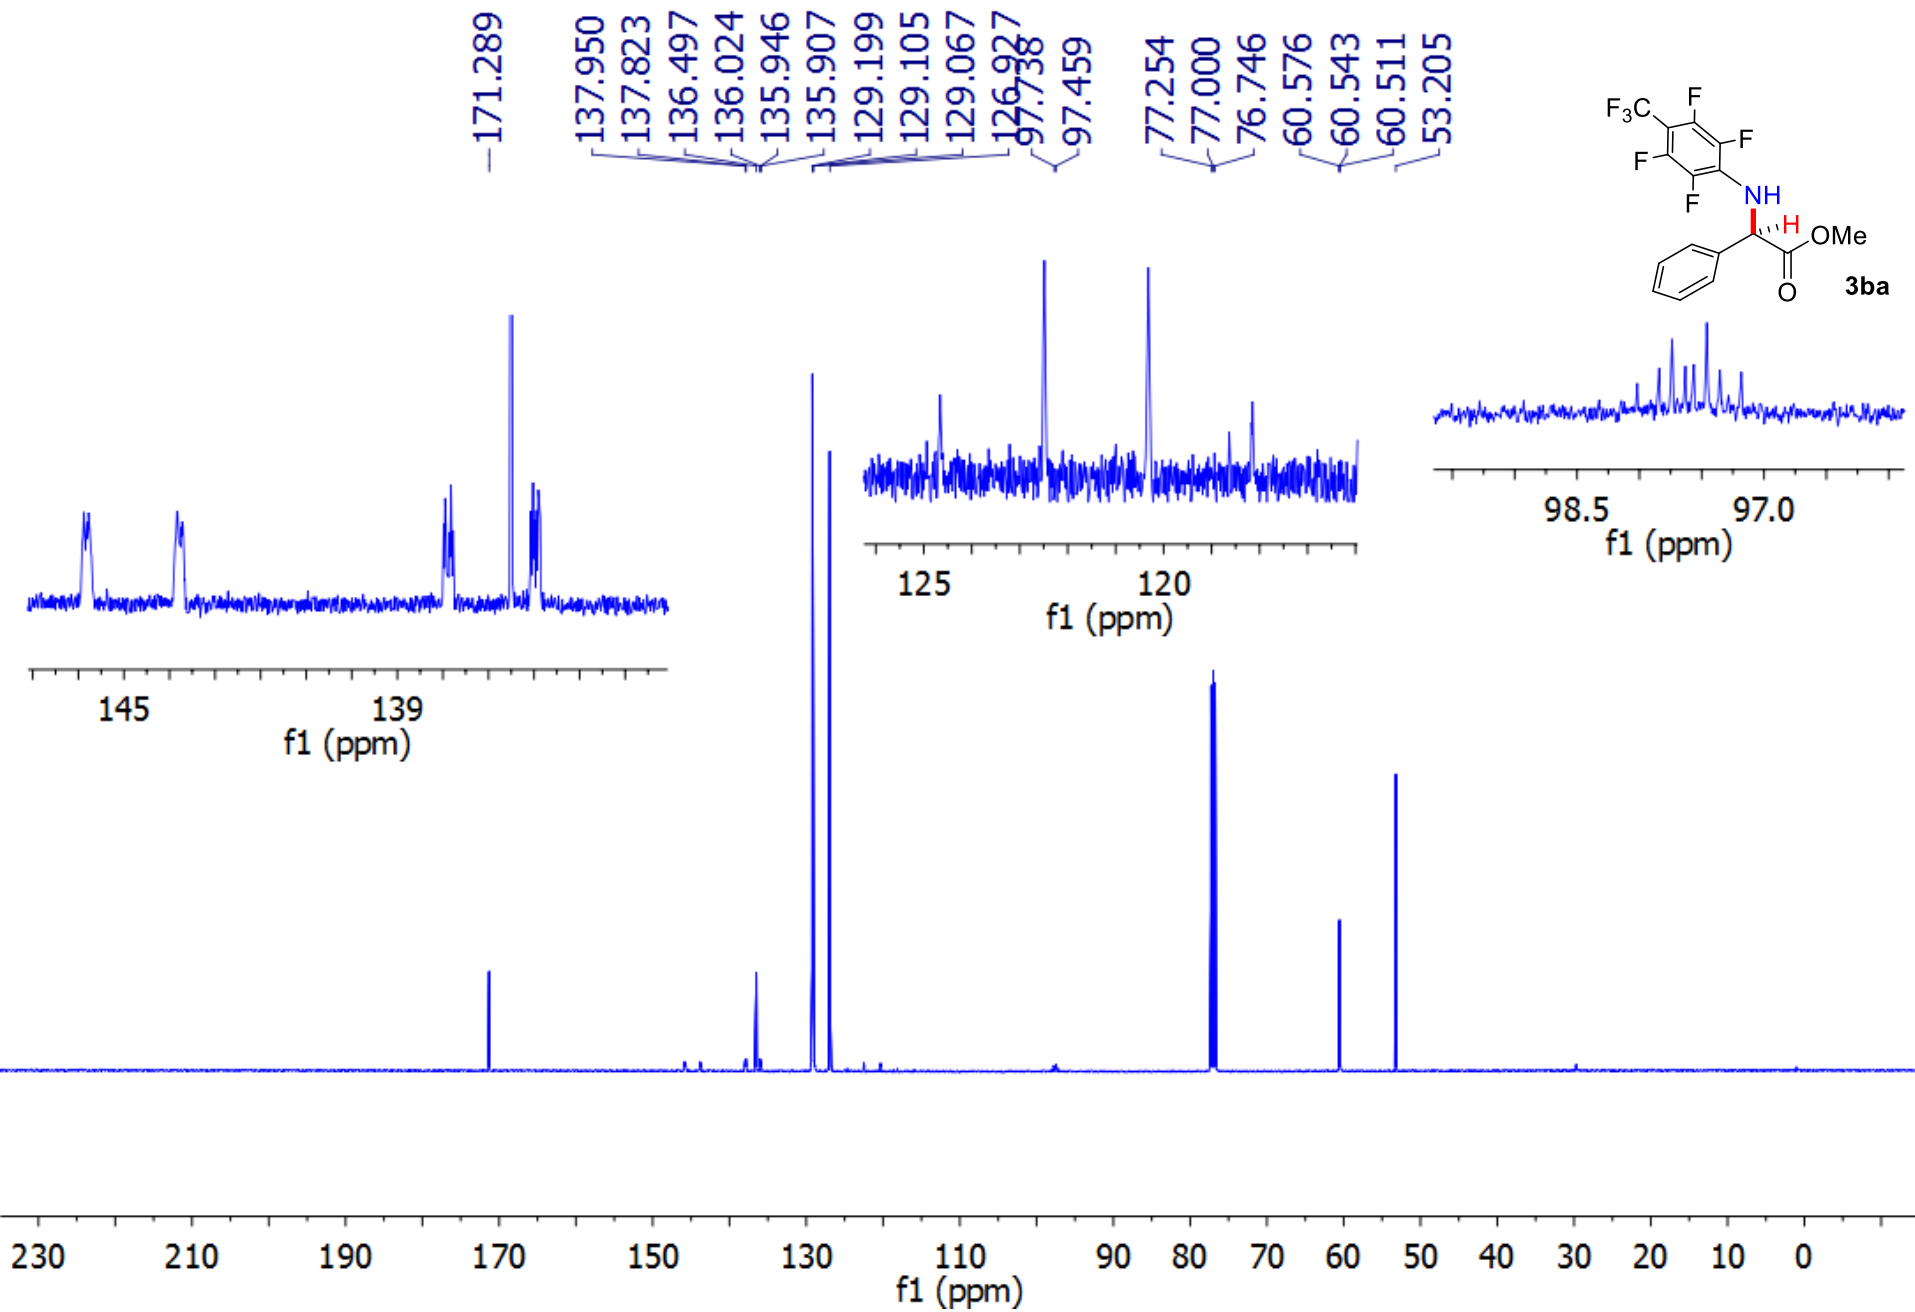

# $^{19}\text{F}$ NMR

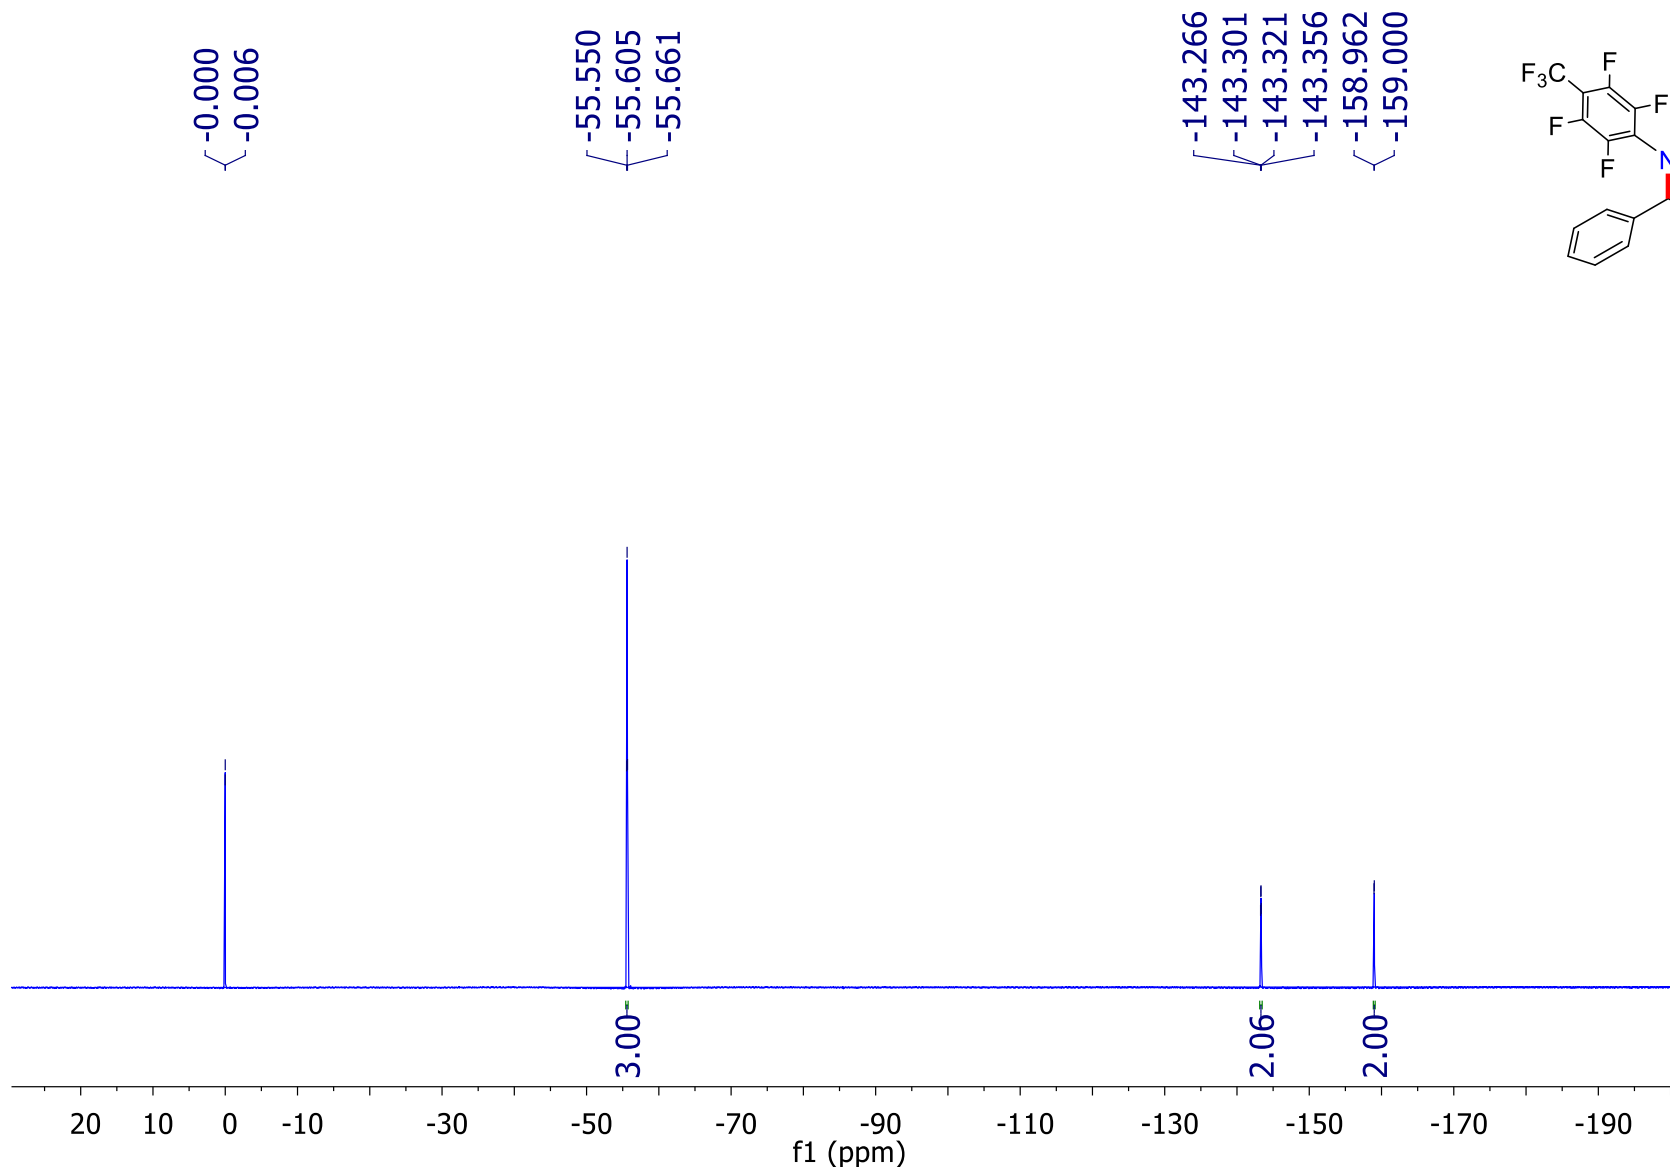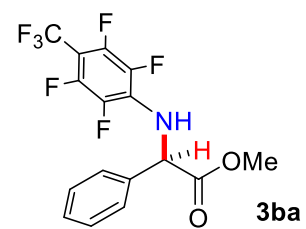

# HPLC

JLM-II-198-1b-ODH1%1ML  
 C:\EZStart\Projects\Default\Method\JLM-ODH-0.2%-0.7ml.met  
 C:\EZStart\Projects\Default\Data\JLM-II-198-1b-ODH1%1ML

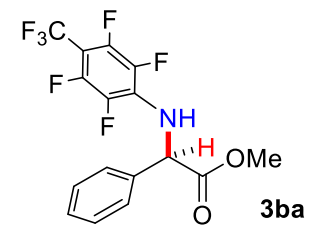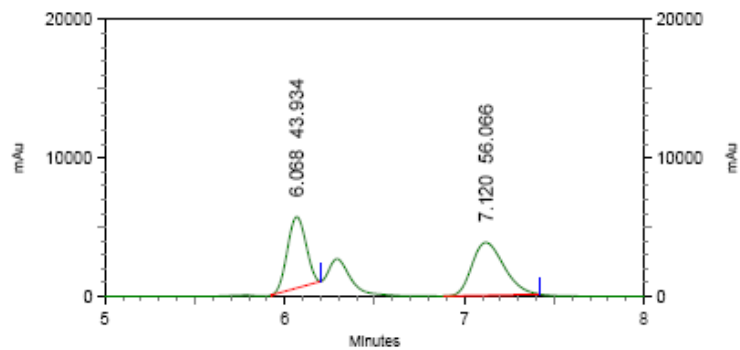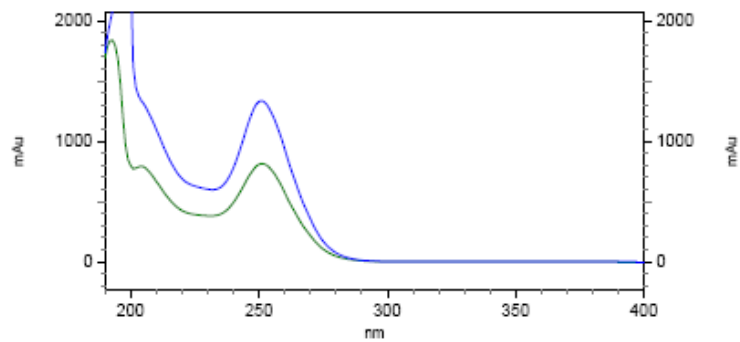

3: 254 nm, 4 nm

Results

| Pk #   | Name | Retention Time | Area Percent |
|--------|------|----------------|--------------|
| 1      |      | 6.068          | 43.934       |
| 2      |      | 7.120          | 56.066       |
| Totals |      |                | 100.000      |



# HPLC

JLM-V-167-1b-ODH1%1ML

C:\EZStart\Projects\Default\Method\JLM-ODH-0.2%-0.7ml.met

C:\EZStart\Projects\Default\Data\JLM-V-167-1b-ODH1%1ML

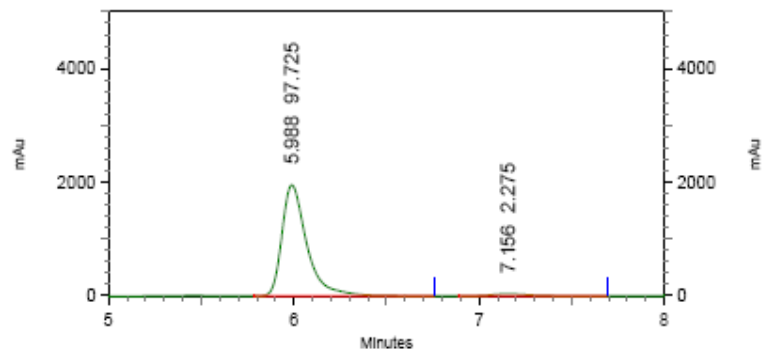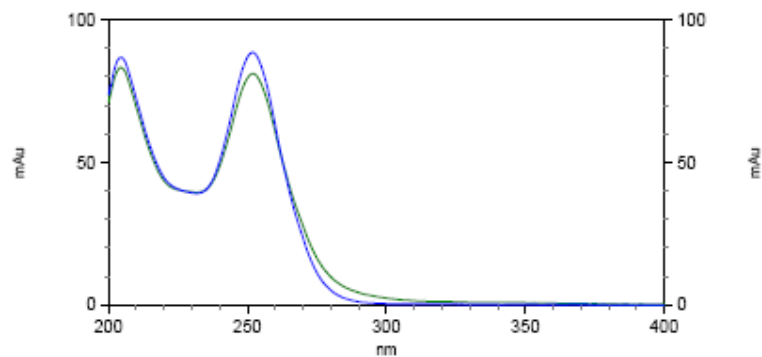

3: 275 nm, 4 nm

Results

| Pk #   | Name | Retention Time | Area Percent |
|--------|------|----------------|--------------|
| 1      |      | 1.800          | 0.000        |
| 2      |      | 5.988          | 97.725       |
| 3      |      | 7.156          | 2.275        |
| Totals |      |                | 100.000      |

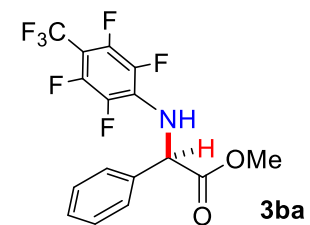

# $^1\text{H}$ NMR

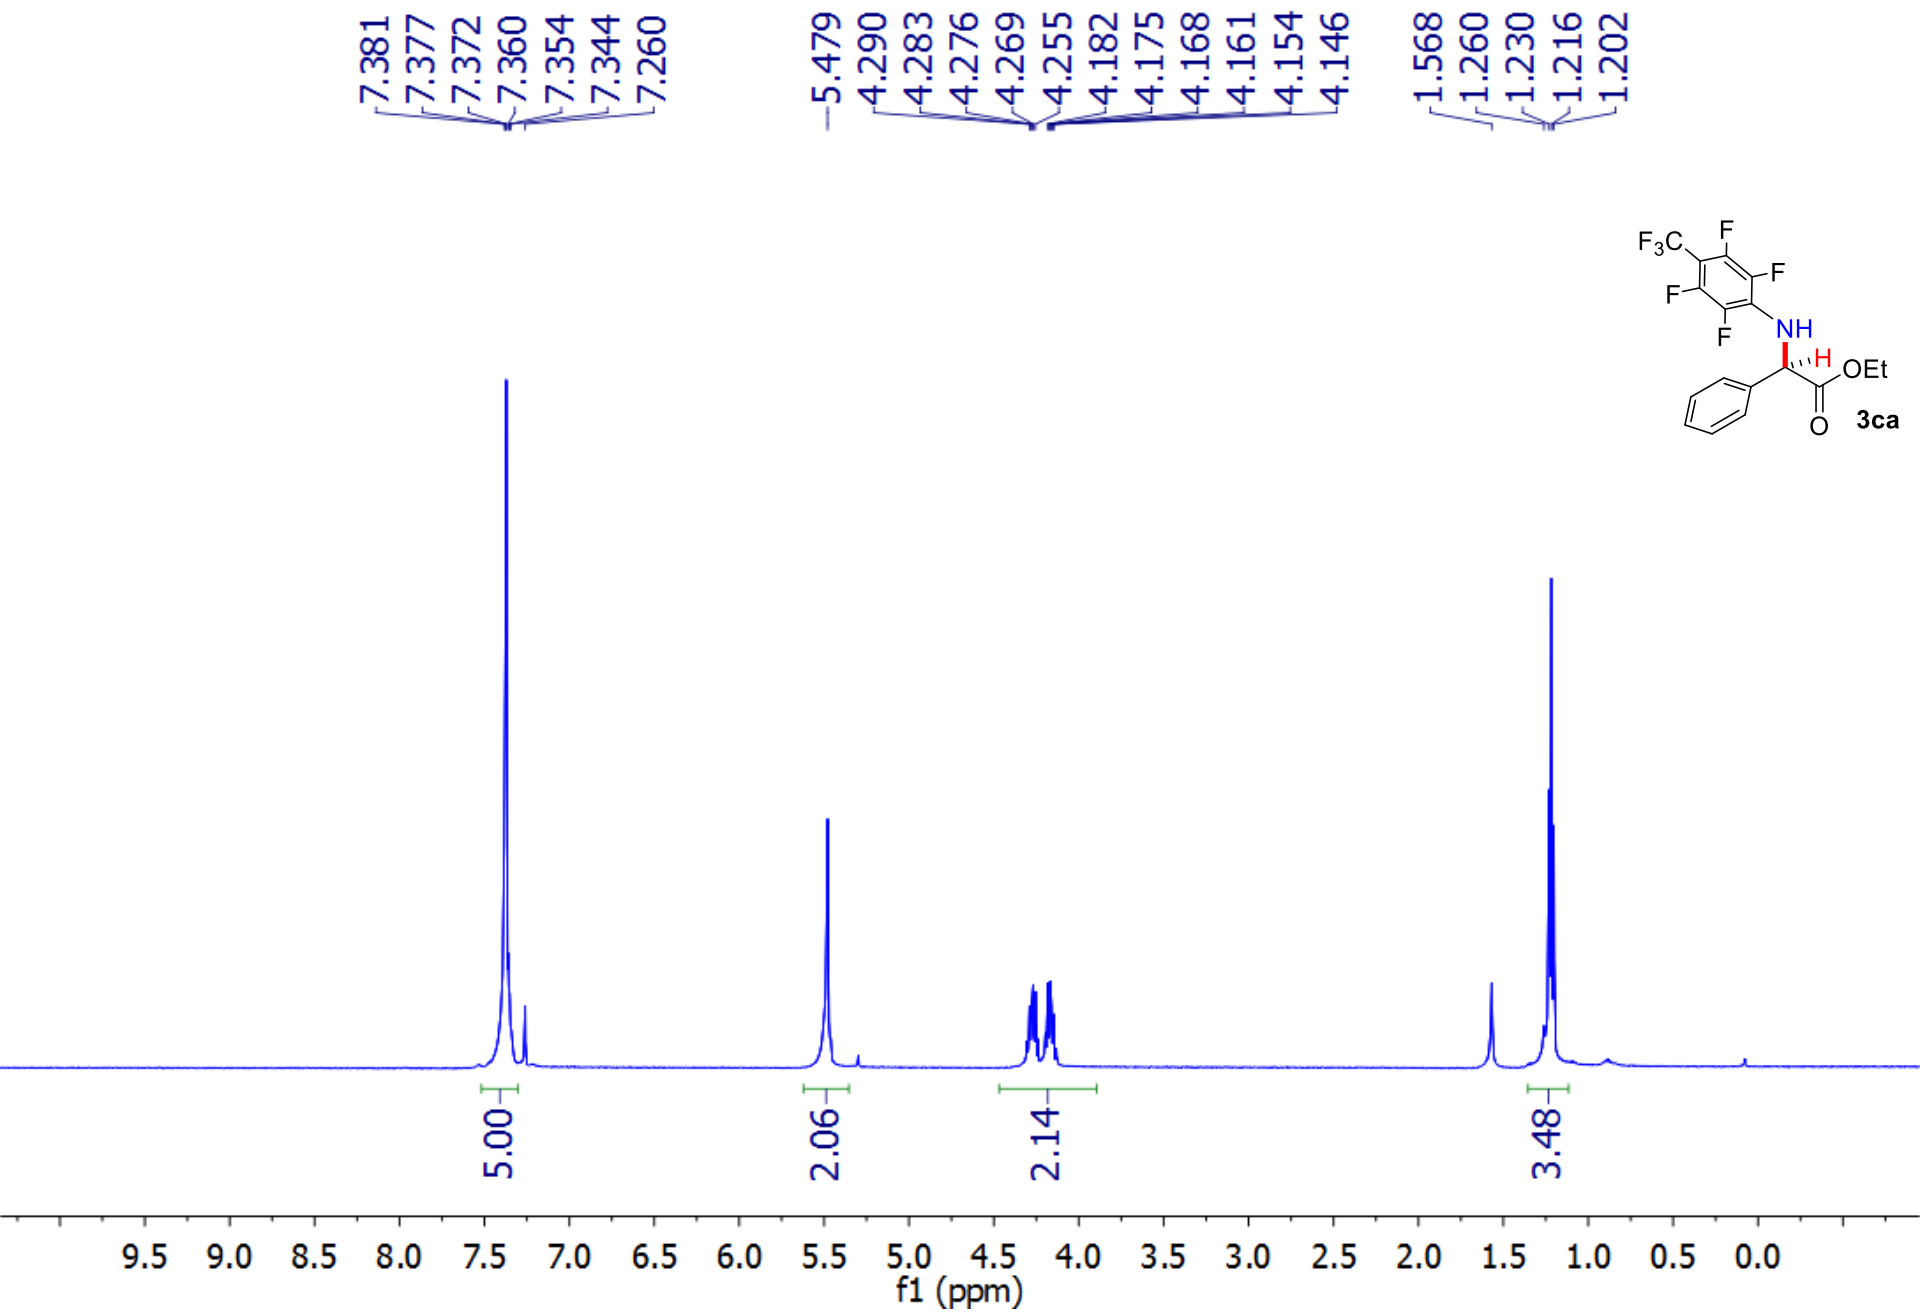

# $^{13}\text{C}$ NMR

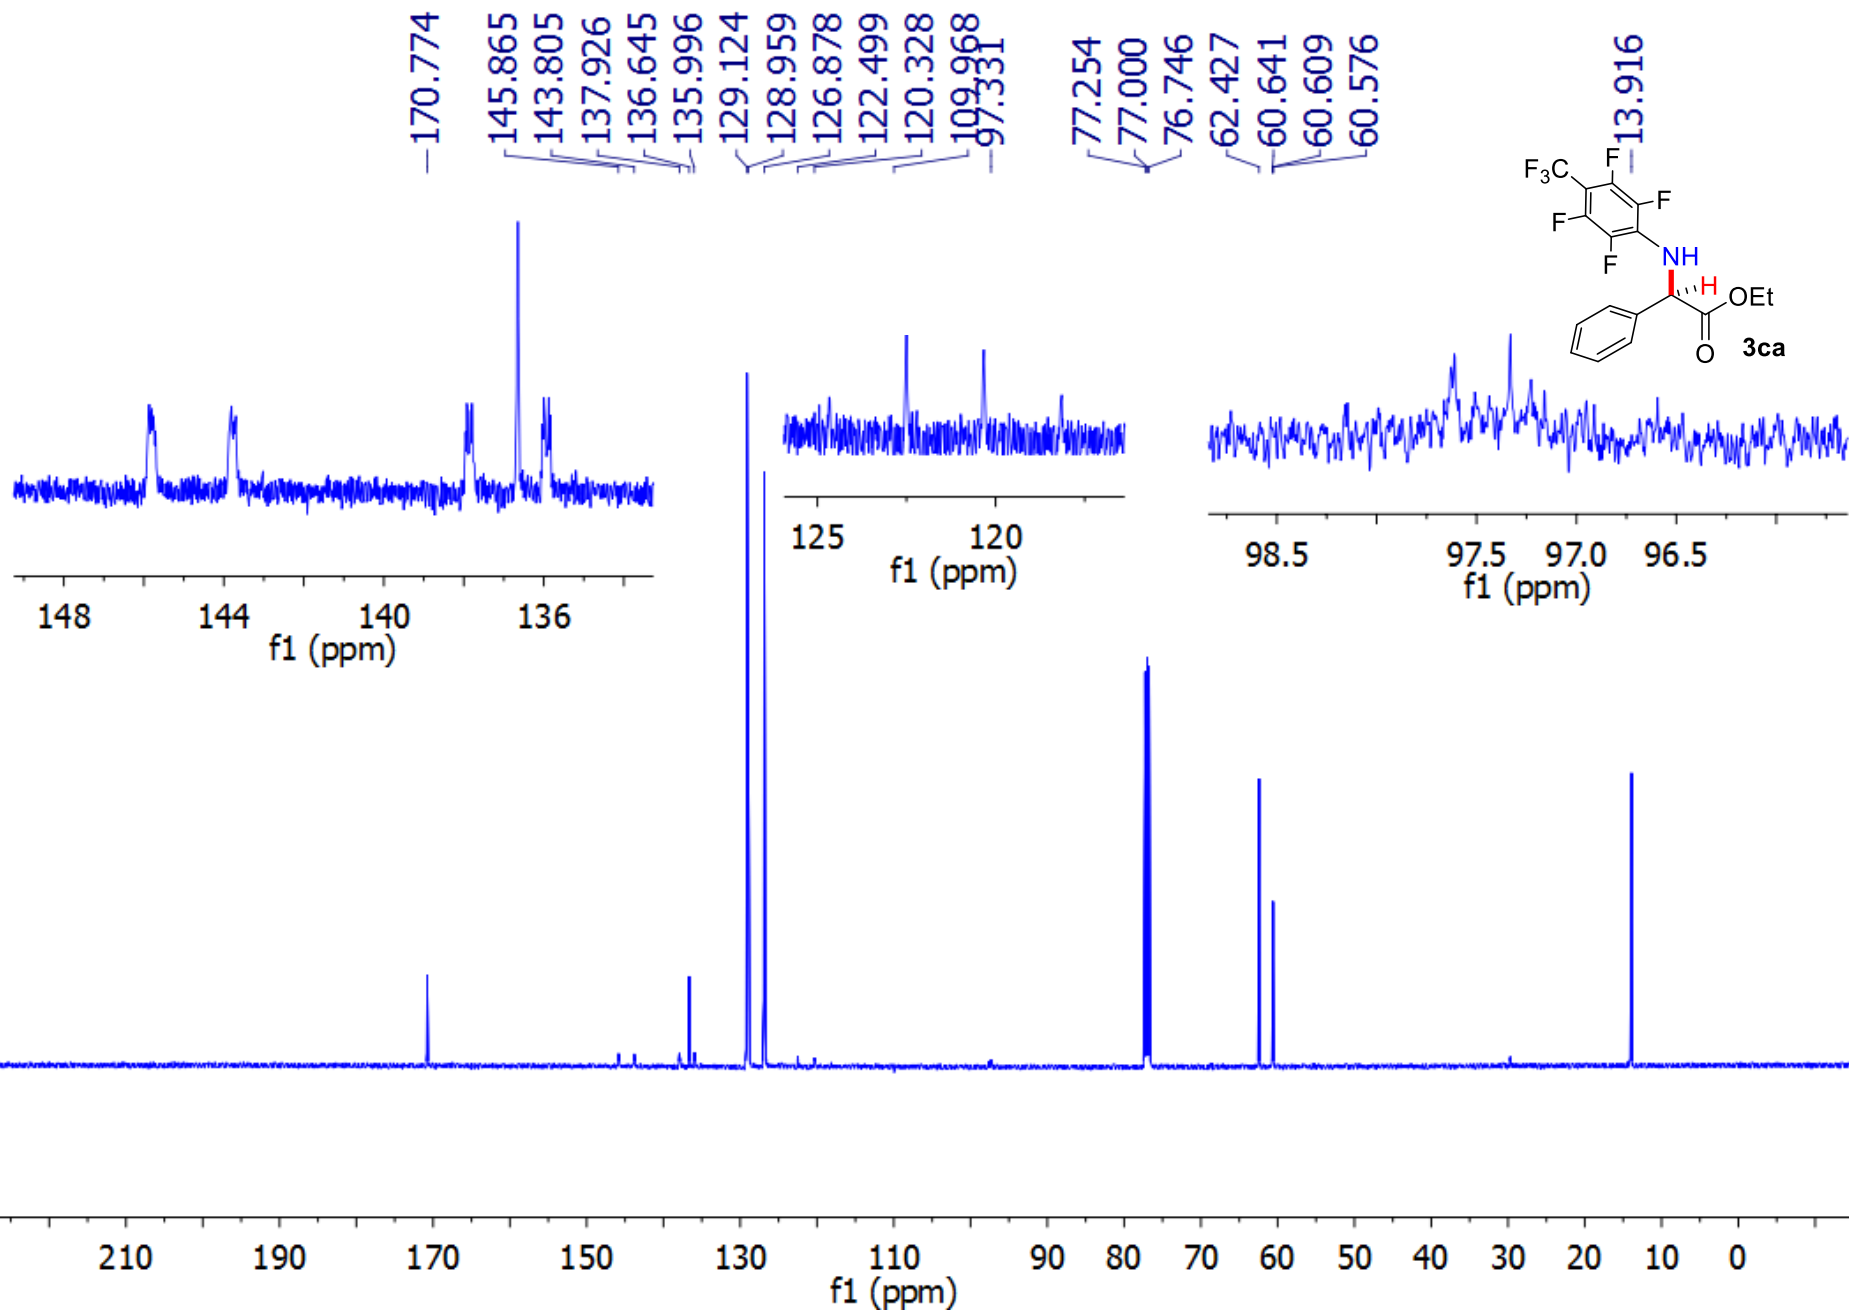

# $^{19}\text{F}$ NMR

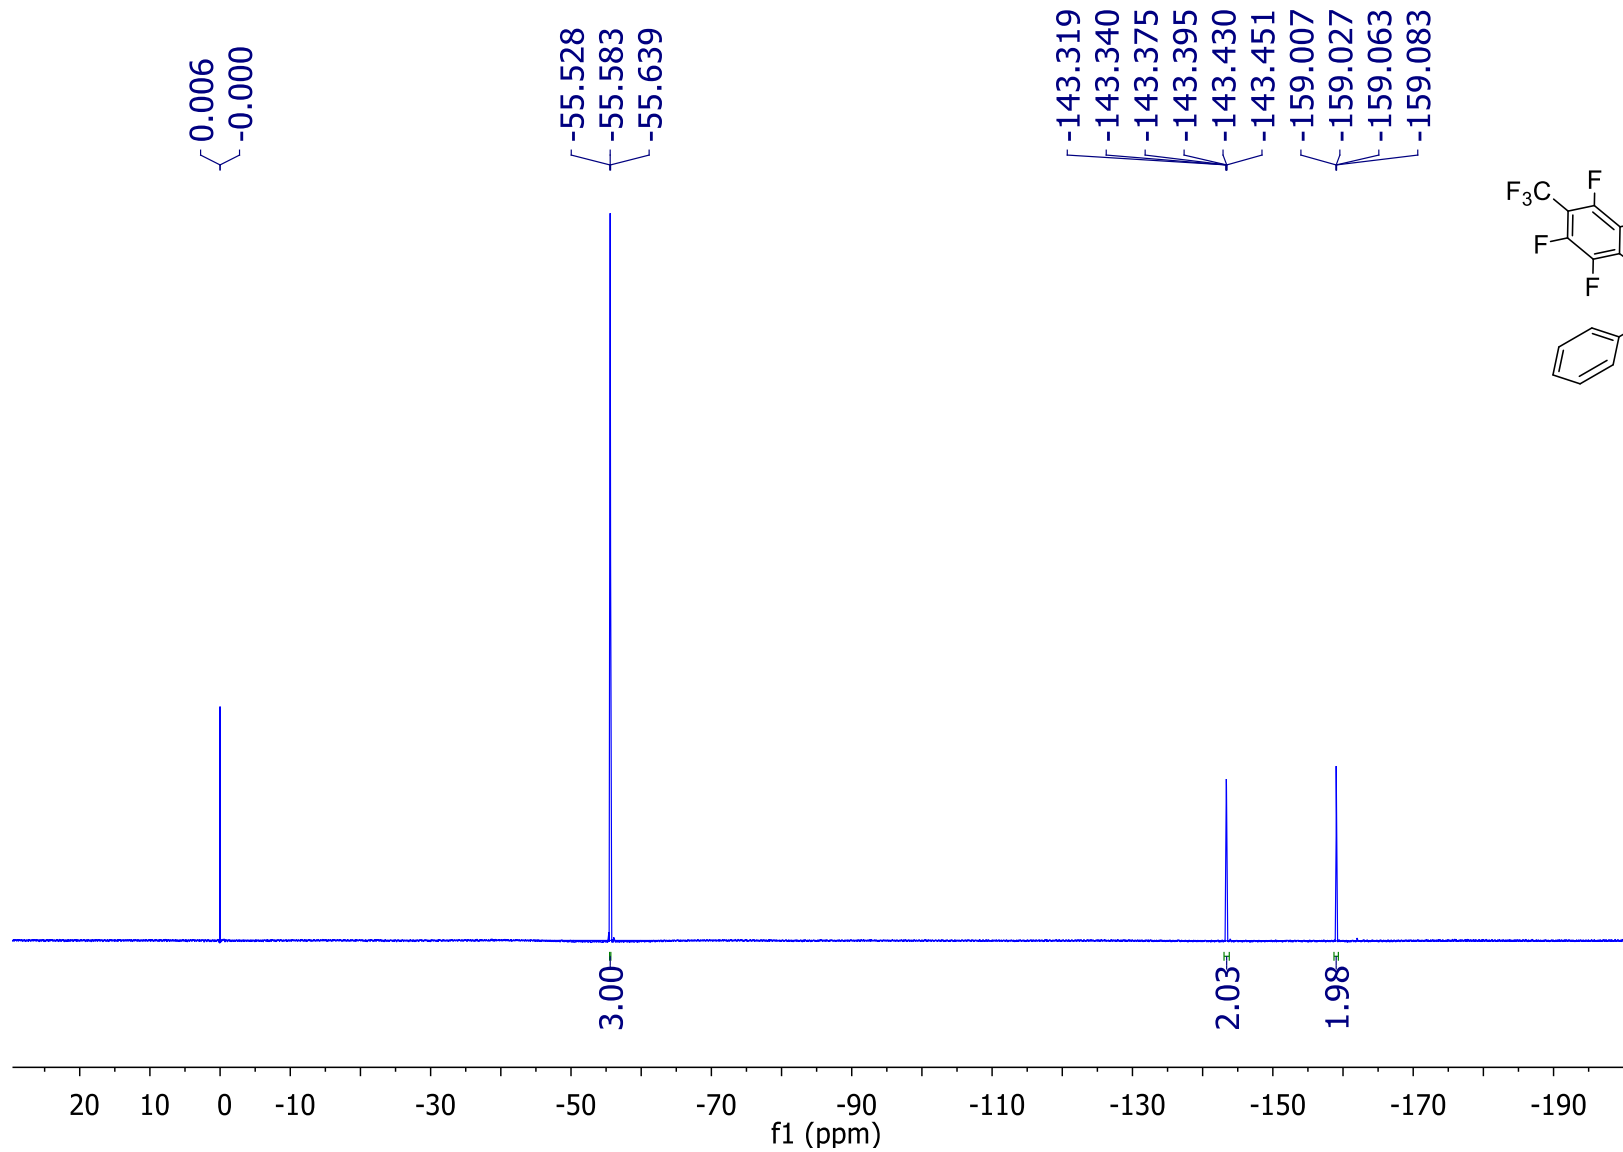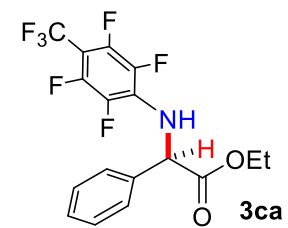

# HPLC

JLM-V-193-1-ODH-3%0.5ML  
C:\EZStart\Projects\Default\Data\JLM-V-193-1-ODH-3%0.5ml  
C:\EZStart\Projects\Default\Method\CQL-AD-H10%1.0ml60min.met  
AD-H column 20%IPA @ 0.8ml/min

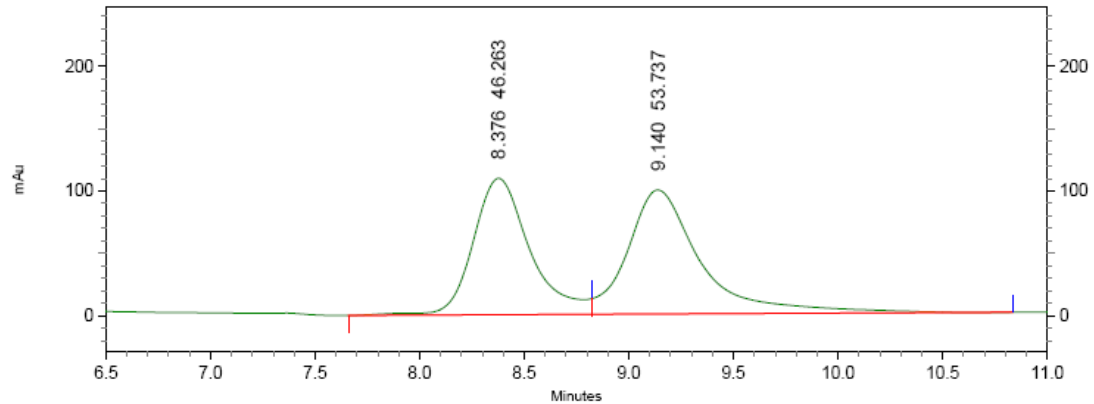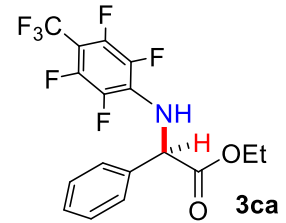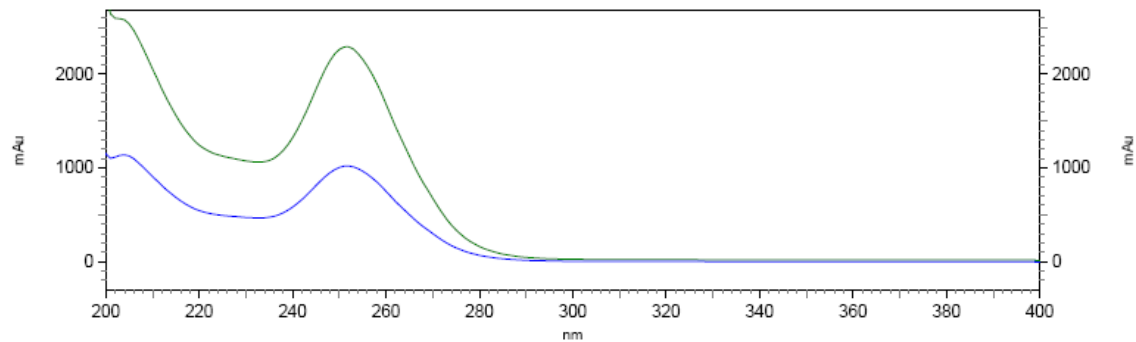

3: 273 nm, 4 nm Results

| Pk #   | Retention Time | Area Percent |
|--------|----------------|--------------|
| 1      | 8.376          | 46.263       |
| 2      | 9.140          | 53.737       |
| Totals |                | 100.000      |

# HPLC

JLM-V-193-2-ODH-3%0.5ML  
C:\EZStart\Projects\Default\Data\JLM-V-193-2-ODH-3%0.5ml  
C:\EZStart\Projects\Default\Method\CQL-AD-H10%1.0ml60min.met  
AD-H column 20%IPA @ 0.8ml/min

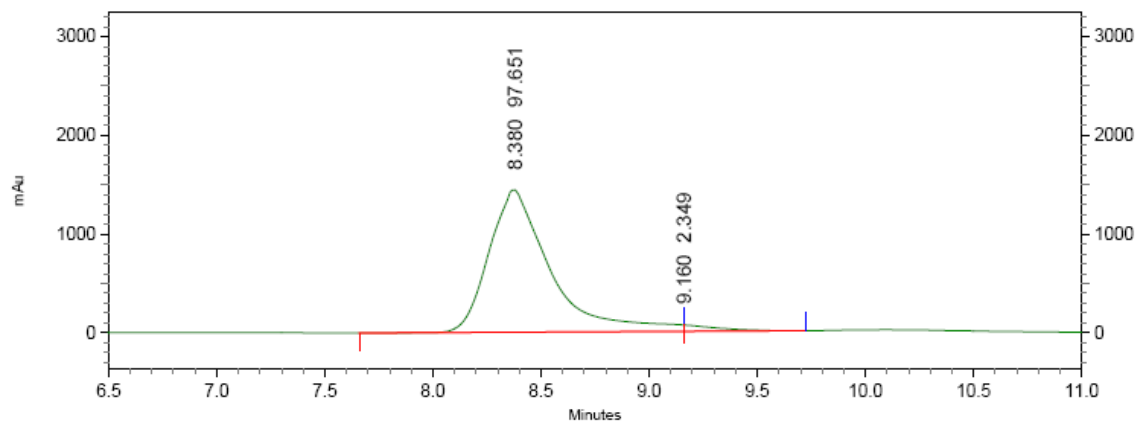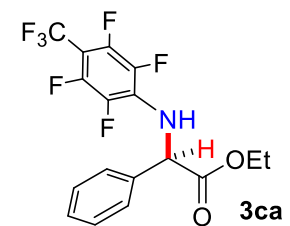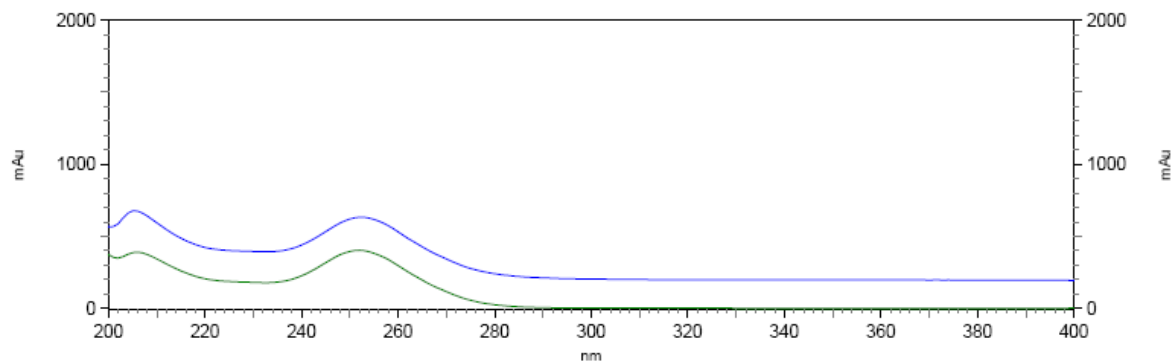

3: 255 nm, 4 nm Results

| Pk # | Retention Time | Area Percent |
|------|----------------|--------------|
| 1    | 8.380          | 97.651       |
| 2    | 9.160          | 2.349        |

|        |  |         |
|--------|--|---------|
| Totals |  | 100.000 |
|--------|--|---------|

# $^1\text{H}$ NMR

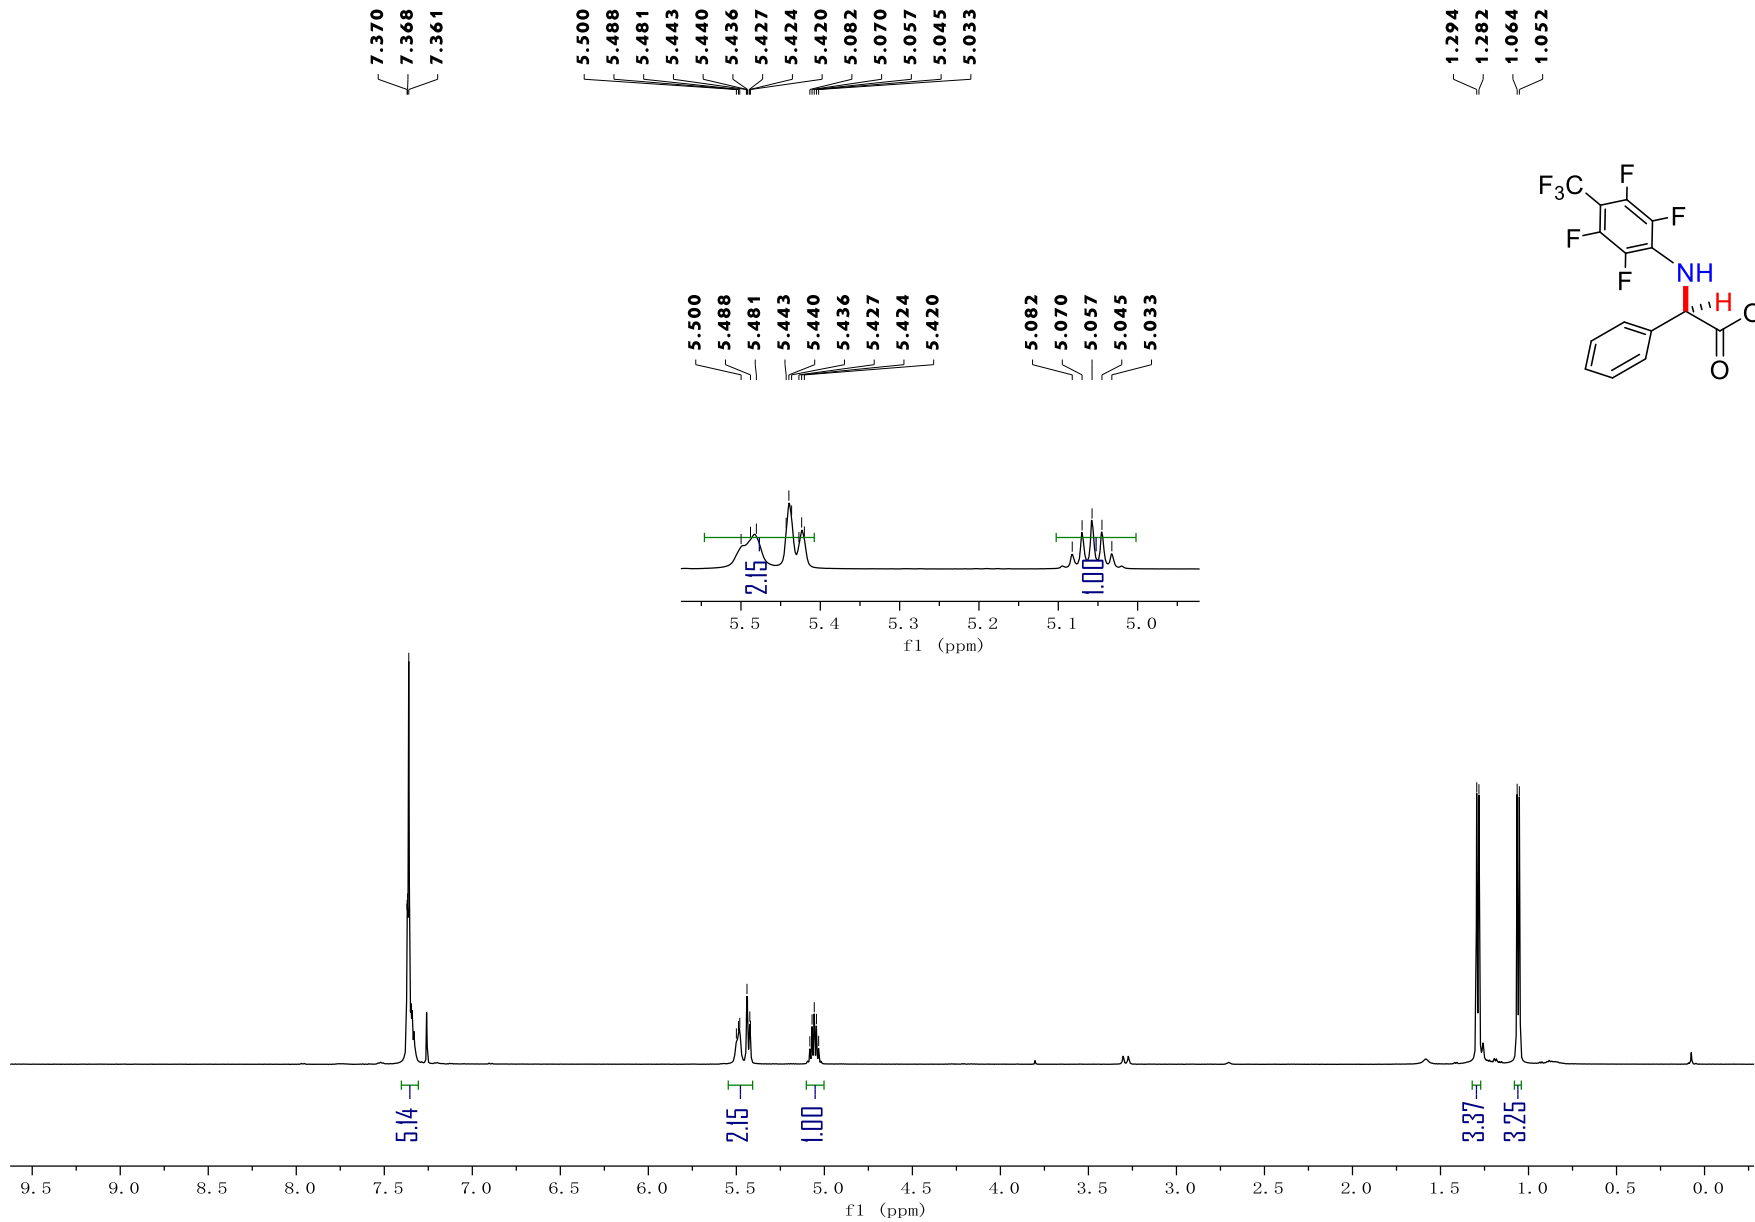

# <sup>13</sup>C NMR

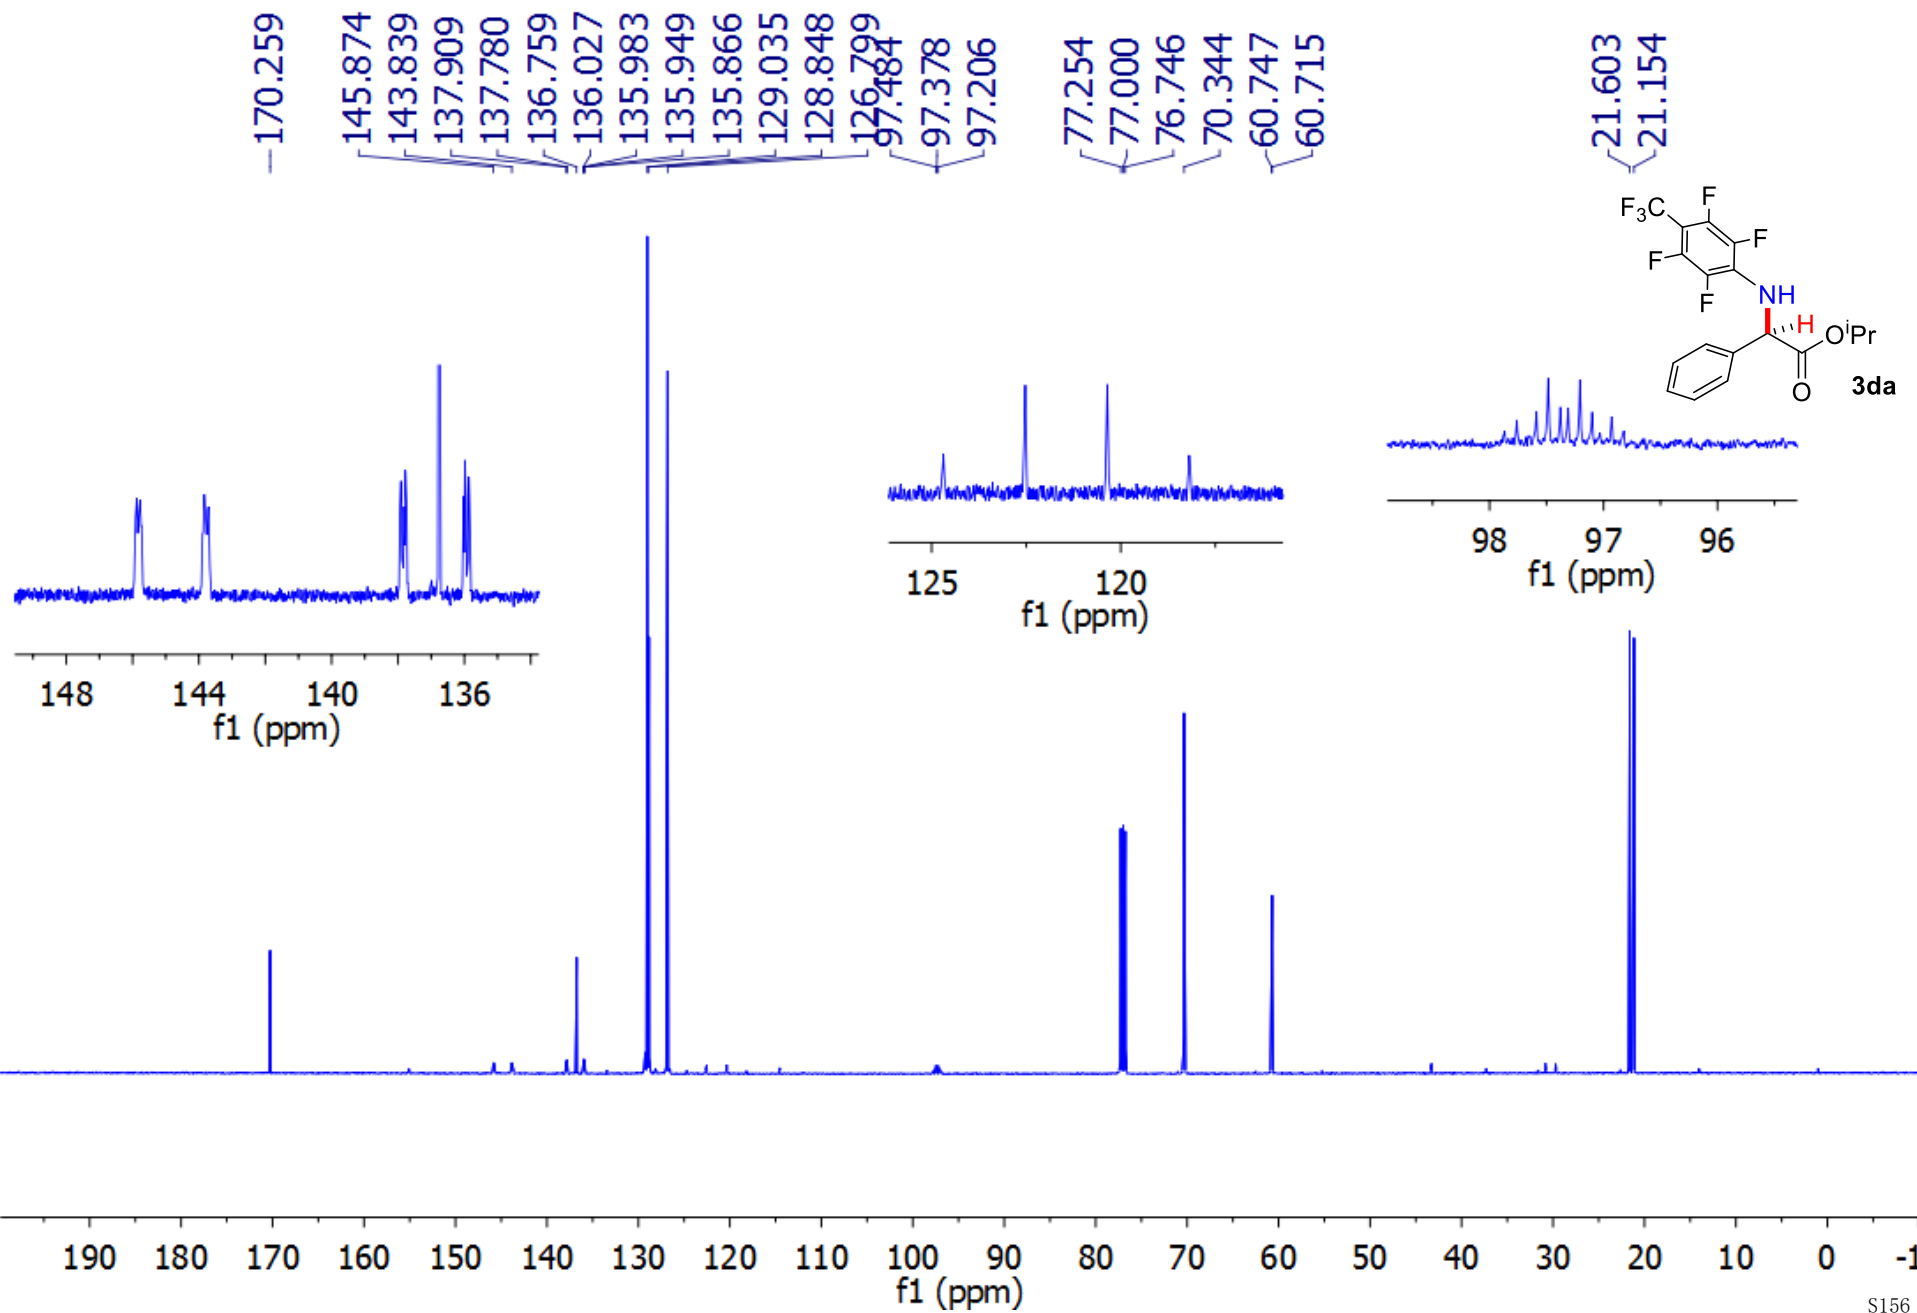



# $^{19}\text{F}$ NMR

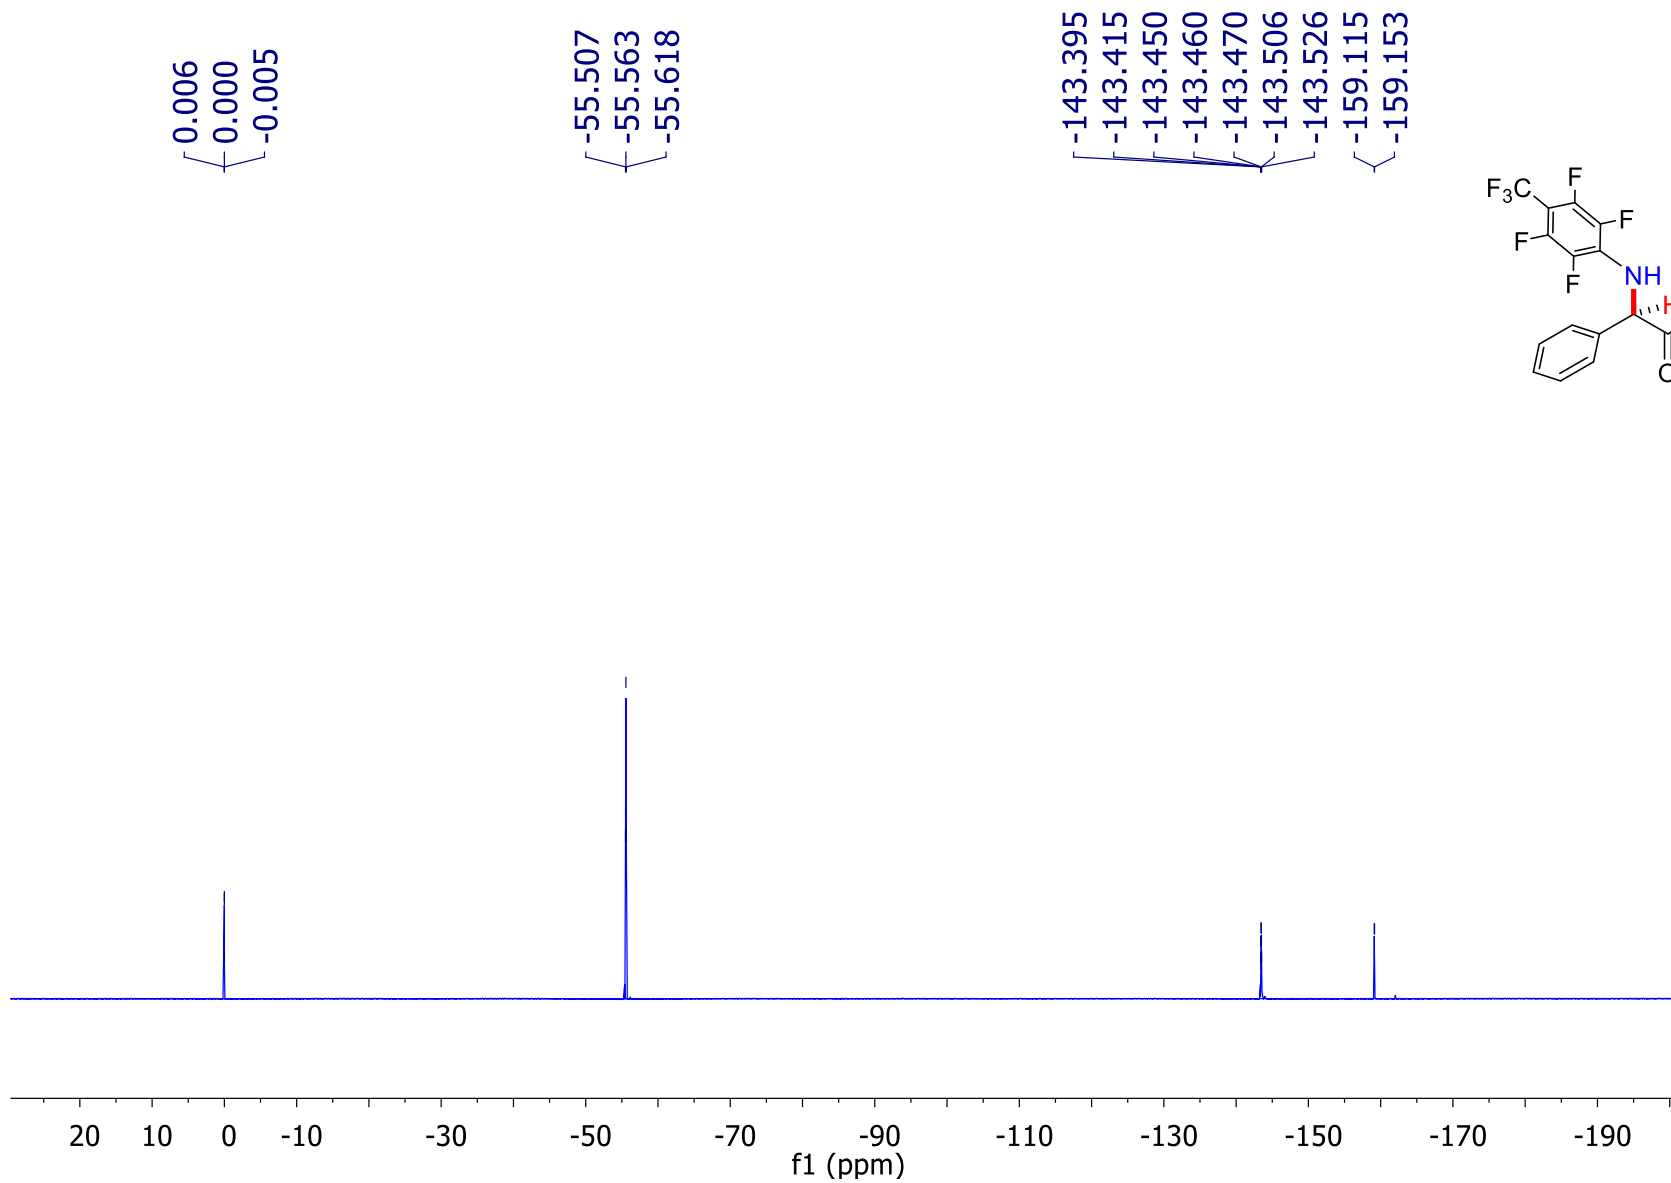

# HPLC

JLM-V-168-1A-whe1k-0%1ML

C:\EZStart\Projects\Default\Method\JLM-ODH-0%-0.7ml.met

C:\EZStart\Projects\Default\Data\JLM-V-168-1A-whe1k-0%1ML

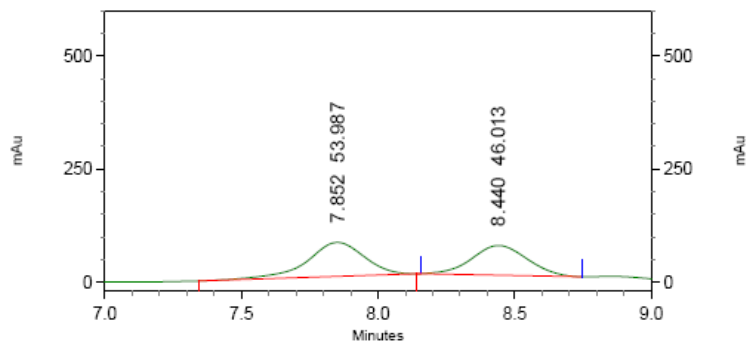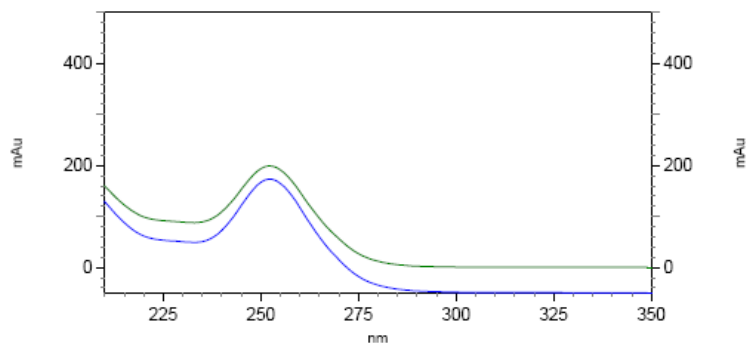

3: 259 nm, 4 nm

Results

| Pk #   | Name | Retention Time | Area Percent |
|--------|------|----------------|--------------|
| 1      |      | 7.852          | 53.987       |
| 2      |      | 8.440          | 46.013       |
| Totals |      |                | 100.000      |

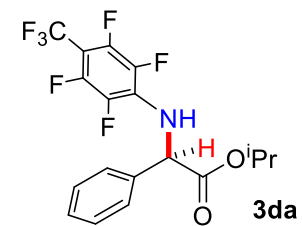

# HPLC

JLM-V-173-wheIk-0%1ML

C:\EZStart\Projects\Default\Method\JLM-ODH-0%-0.7ml.met

C:\EZStart\Projects\Default\Data\JLM-V-173-wheIk-0%1ML

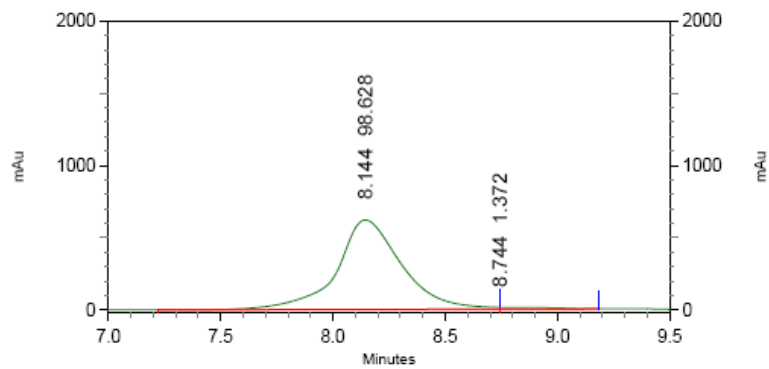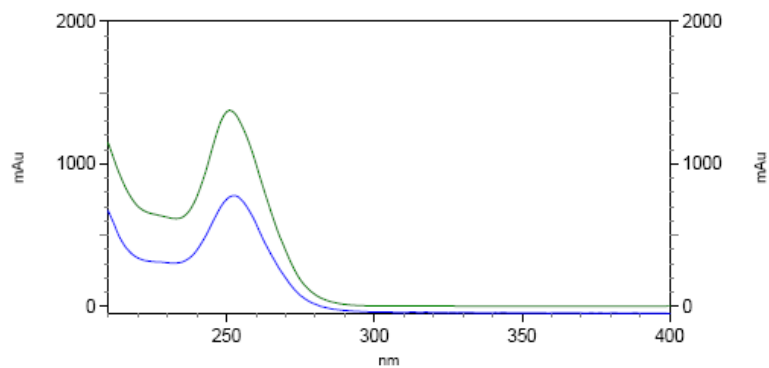

3: 258 nm, 4 nm

Results

| Pk #   | Name | Retention Time | Area Percent |
|--------|------|----------------|--------------|
| 1      |      | 8.144          | 98.628       |
| 2      |      | 8.744          | 1.372        |
| Totals |      |                | 100.000      |

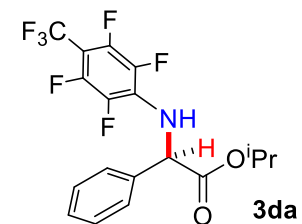

# <sup>1</sup>H NMR

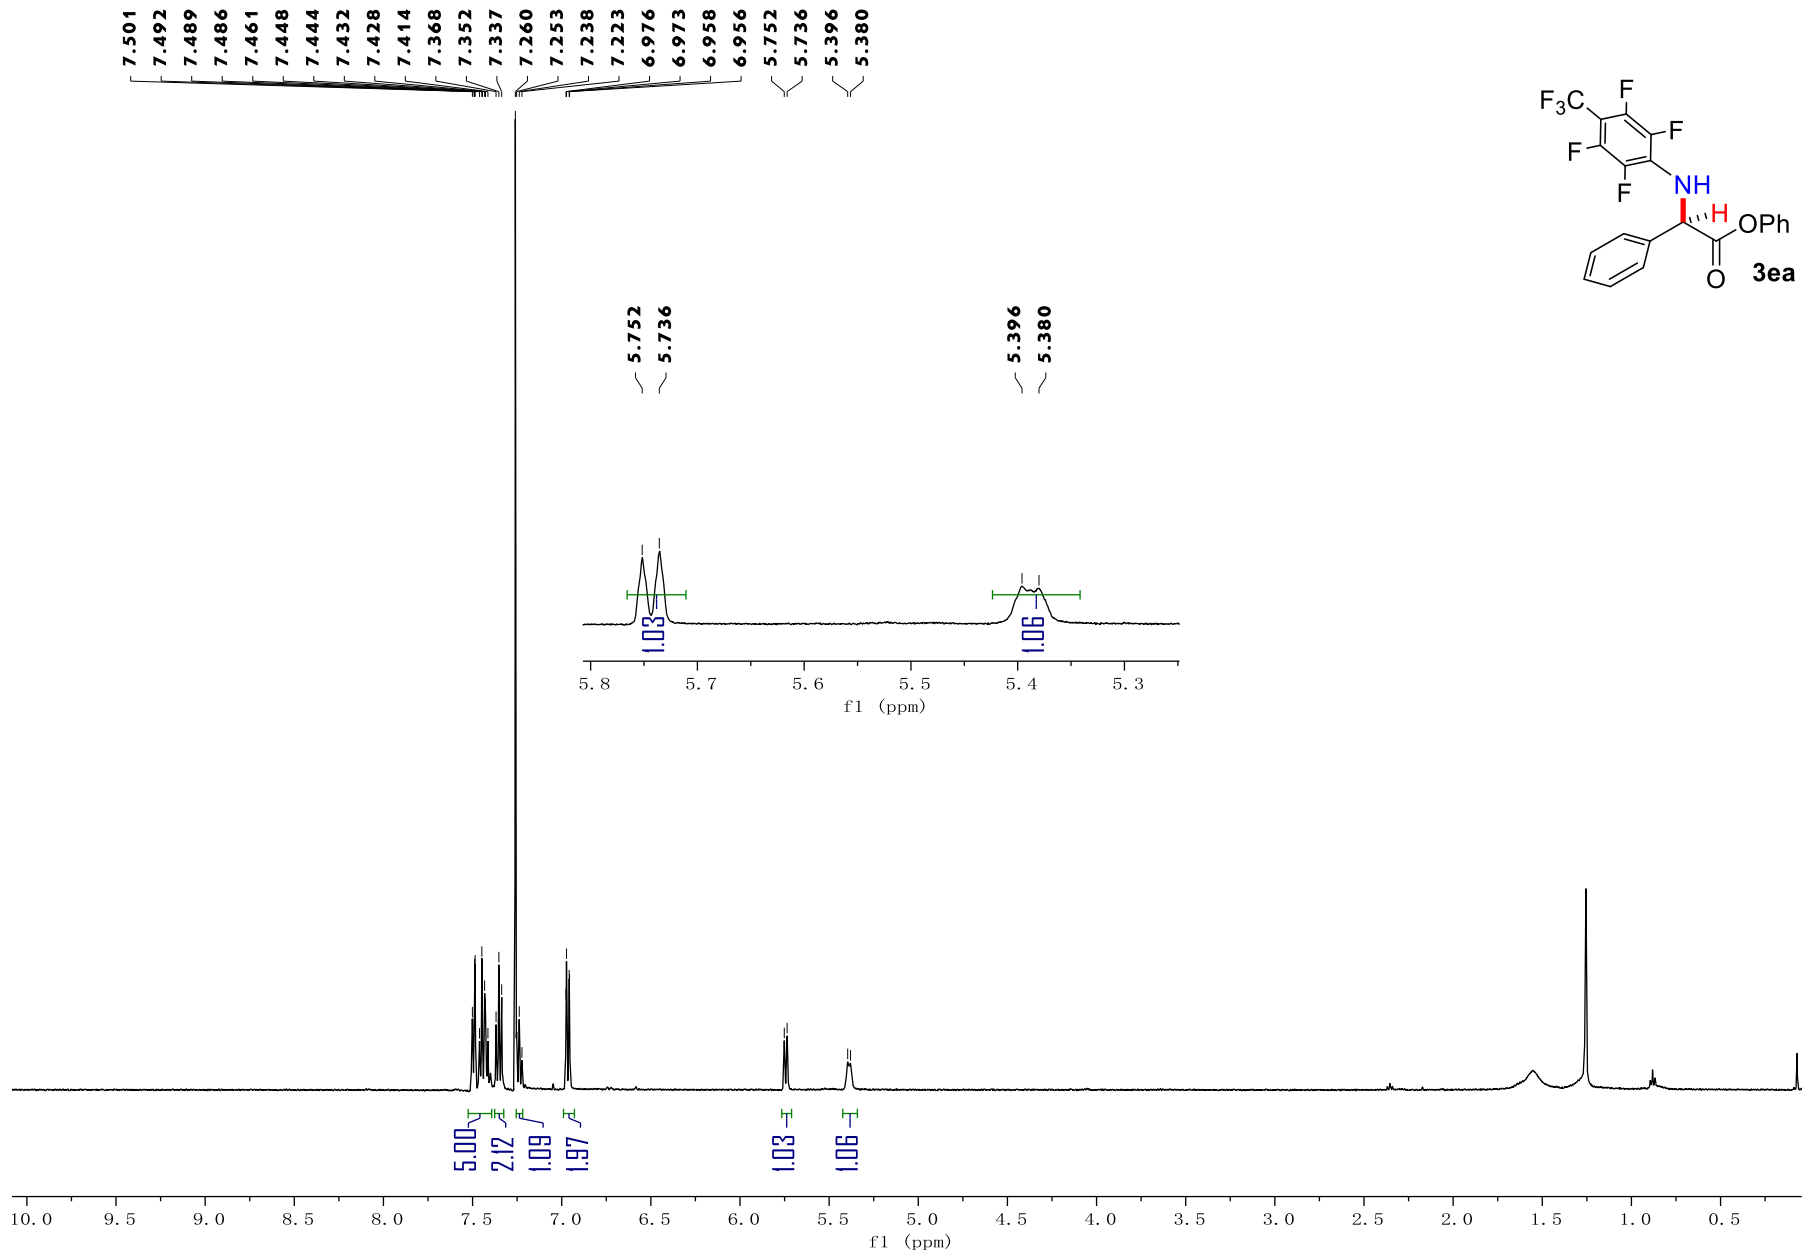

# $^{13}\text{C}$ NMR

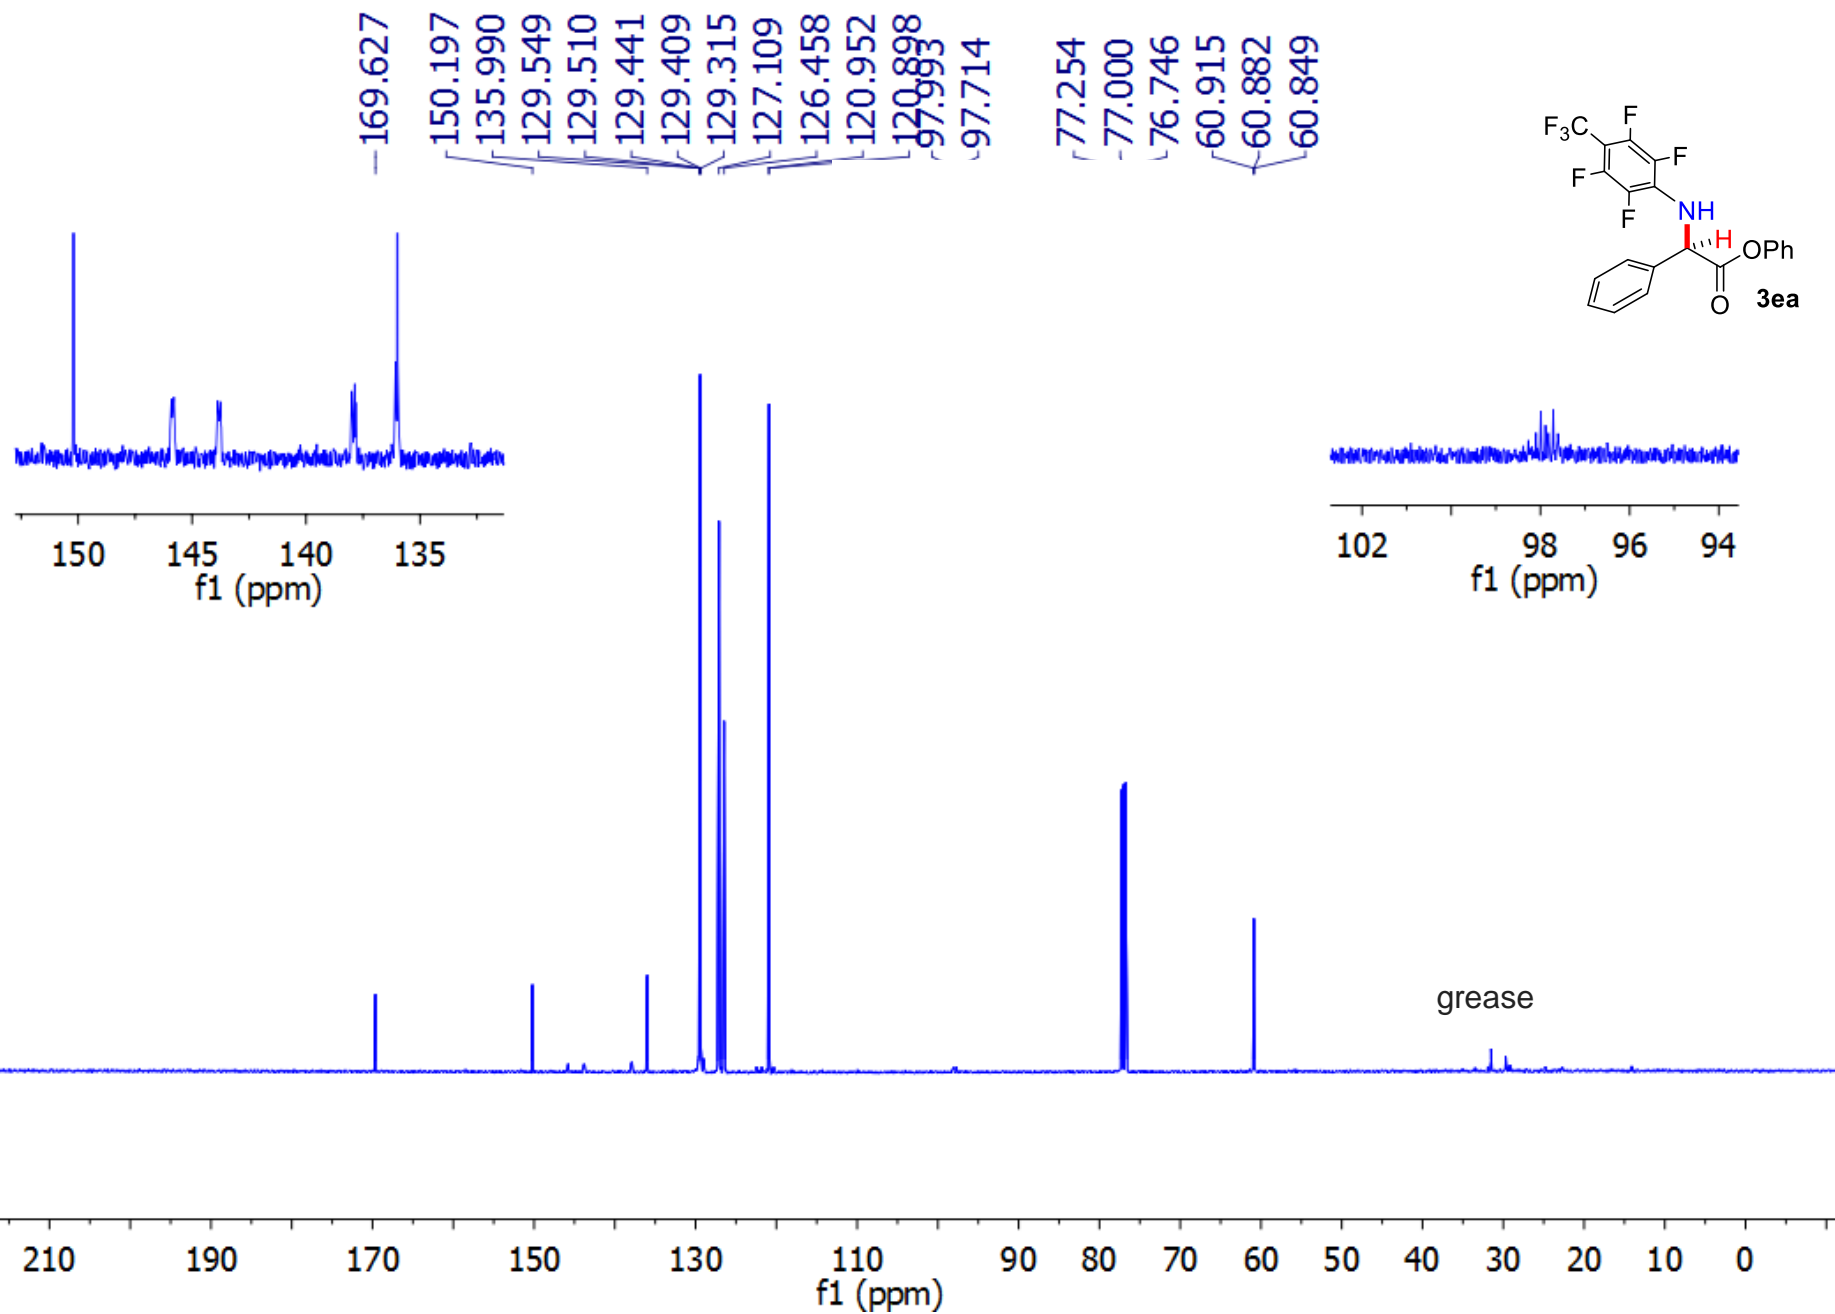

# $^{19}\text{F}$ NMR

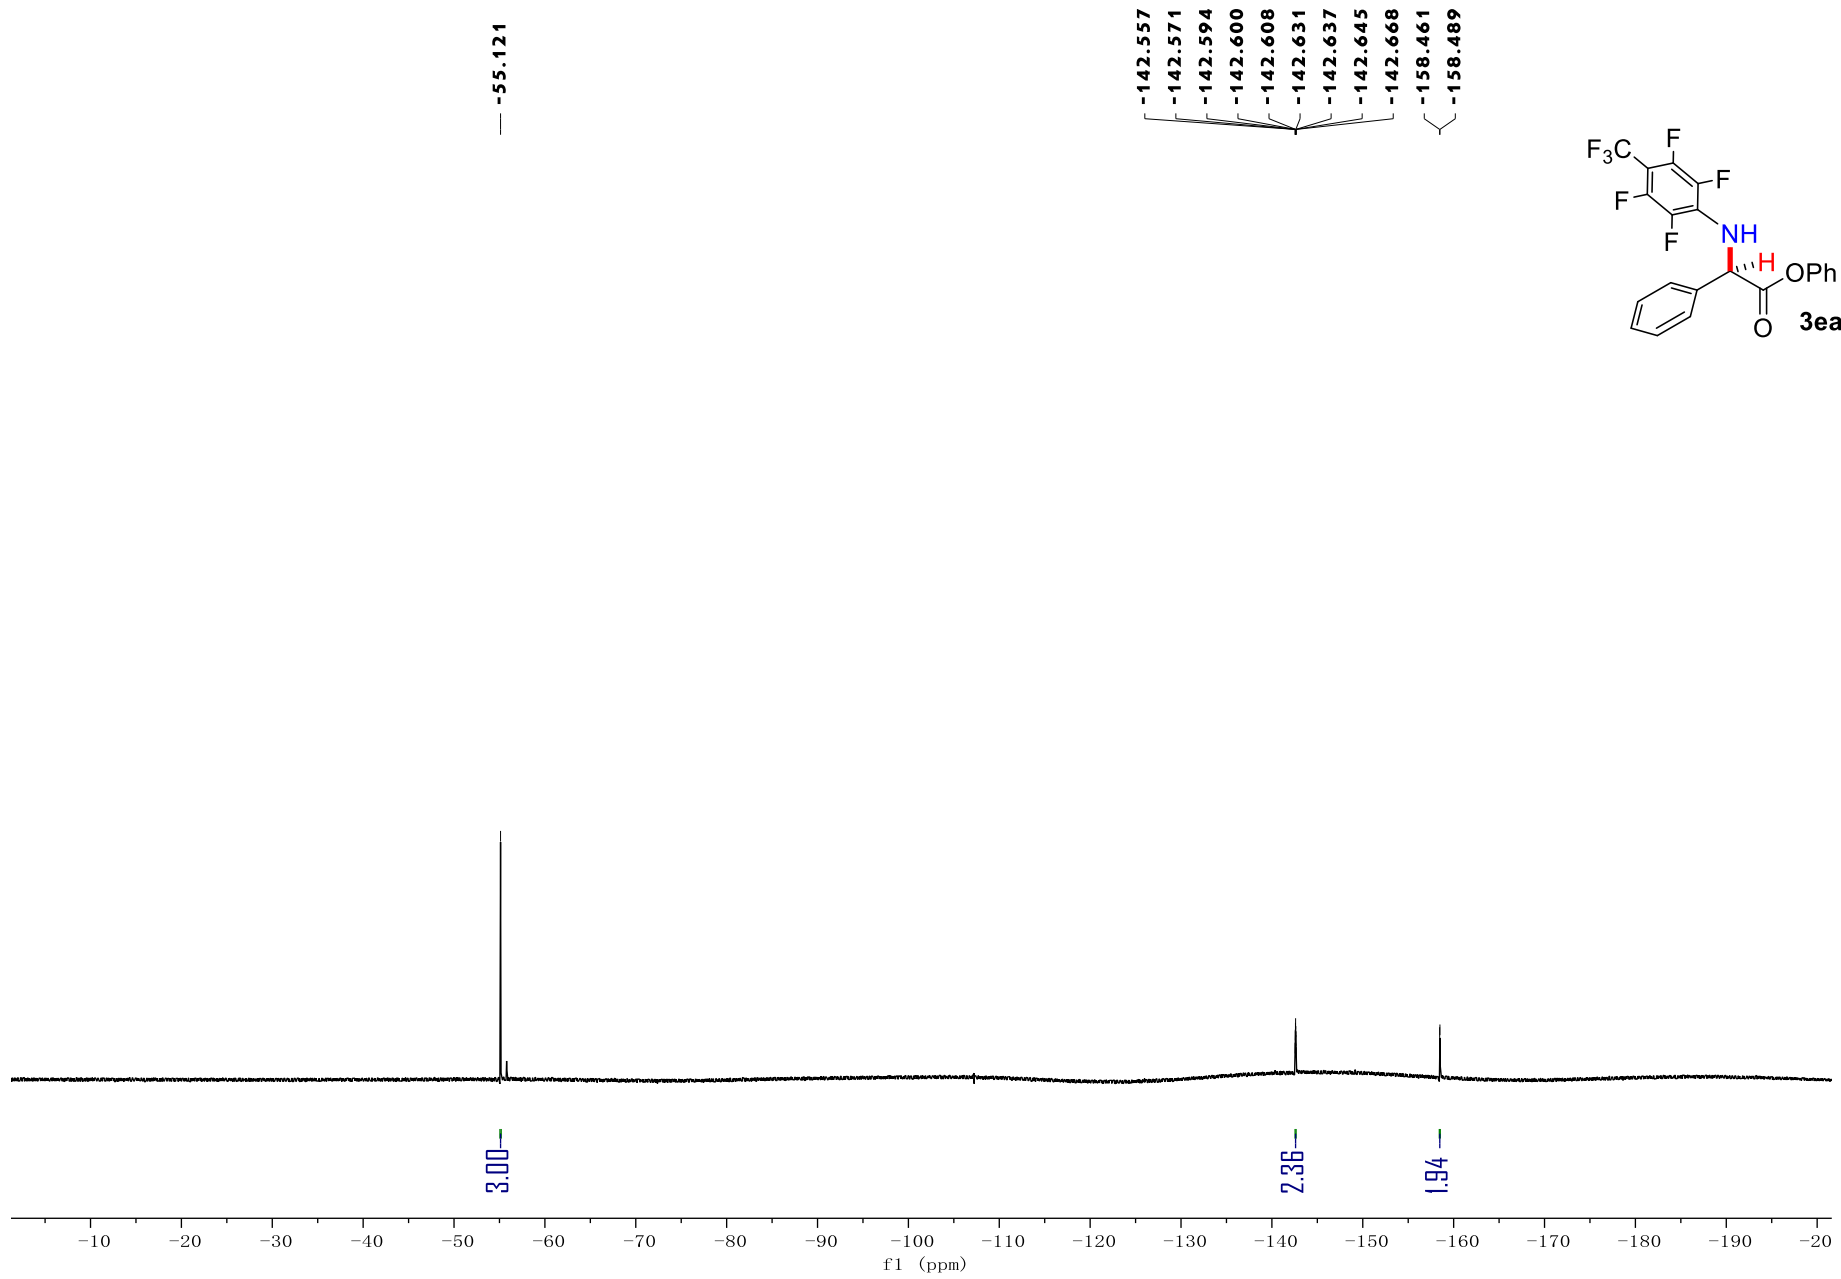

# HPLC

JLM-II-243-1-ADH-1%0.7ML

C:\EZStart\Projects\Default\Method\XC-5%-ADH1ml.met

C:\EZStart\Projects\Default\Data\JLM-II-243-1-ADH-1%0.7ML

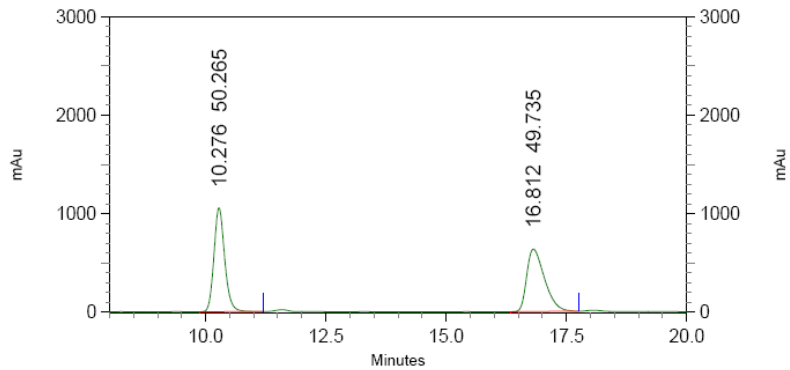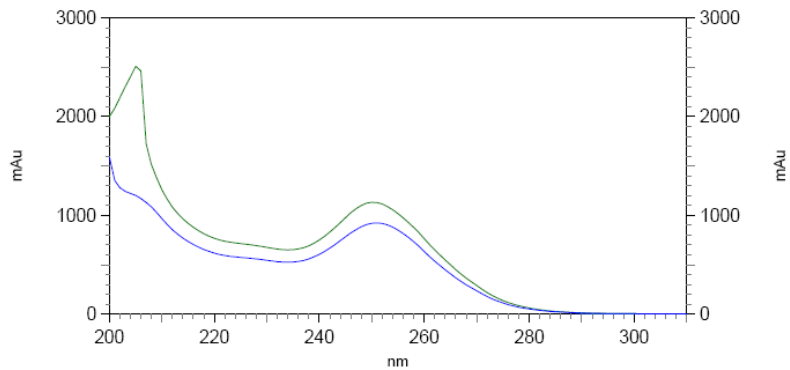

4: 241 nm, 4 nm

Results

| Name | Retention Time | Area Percent | Pk # |
|------|----------------|--------------|------|
|      | 10.276         | 50.265       | 1    |
|      | 16.812         | 49.735       | 2    |

|        |  |         |  |
|--------|--|---------|--|
| Totals |  | 100.000 |  |
|--------|--|---------|--|

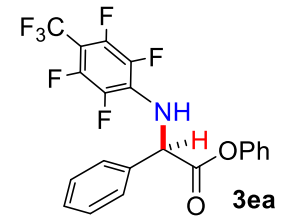

# HPLC

JLM-V-199-1A-ADH-1%0.7ML

C:\EZStart\Projects\Default\Method\XC-5%-ADH1ml.met

C:\EZStart\Projects\Default\Data\JLM-V-199-1A-ADH-1%0.7ML

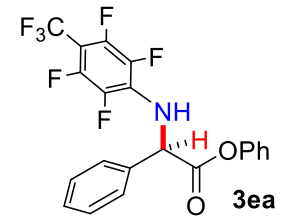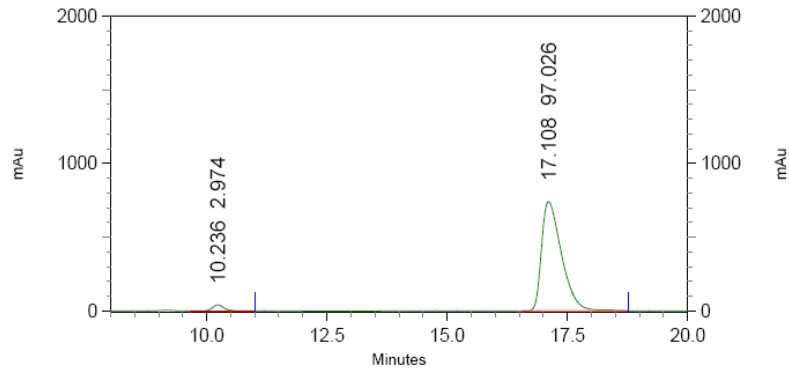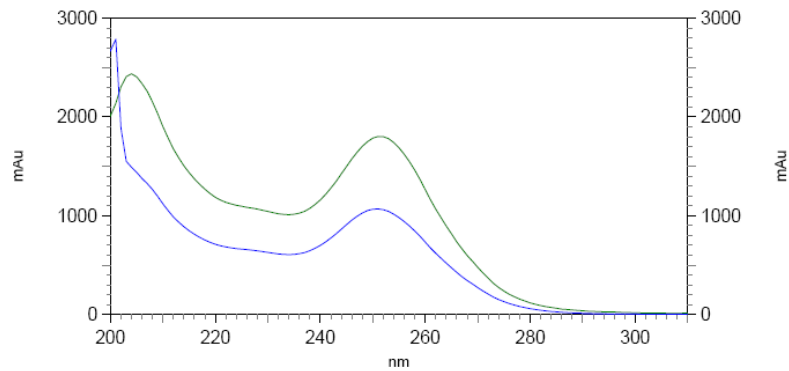

4: 241 nm, 4 nm

Results

| Name | Retention Time | Area Percent | Pk # |
|------|----------------|--------------|------|
|      | 10.236         | 2.974        | 1    |
|      | 17.108         | 97.026       | 2    |

|        |         |  |
|--------|---------|--|
| Totals | 100.000 |  |
|--------|---------|--|



# <sup>1</sup>H NMR

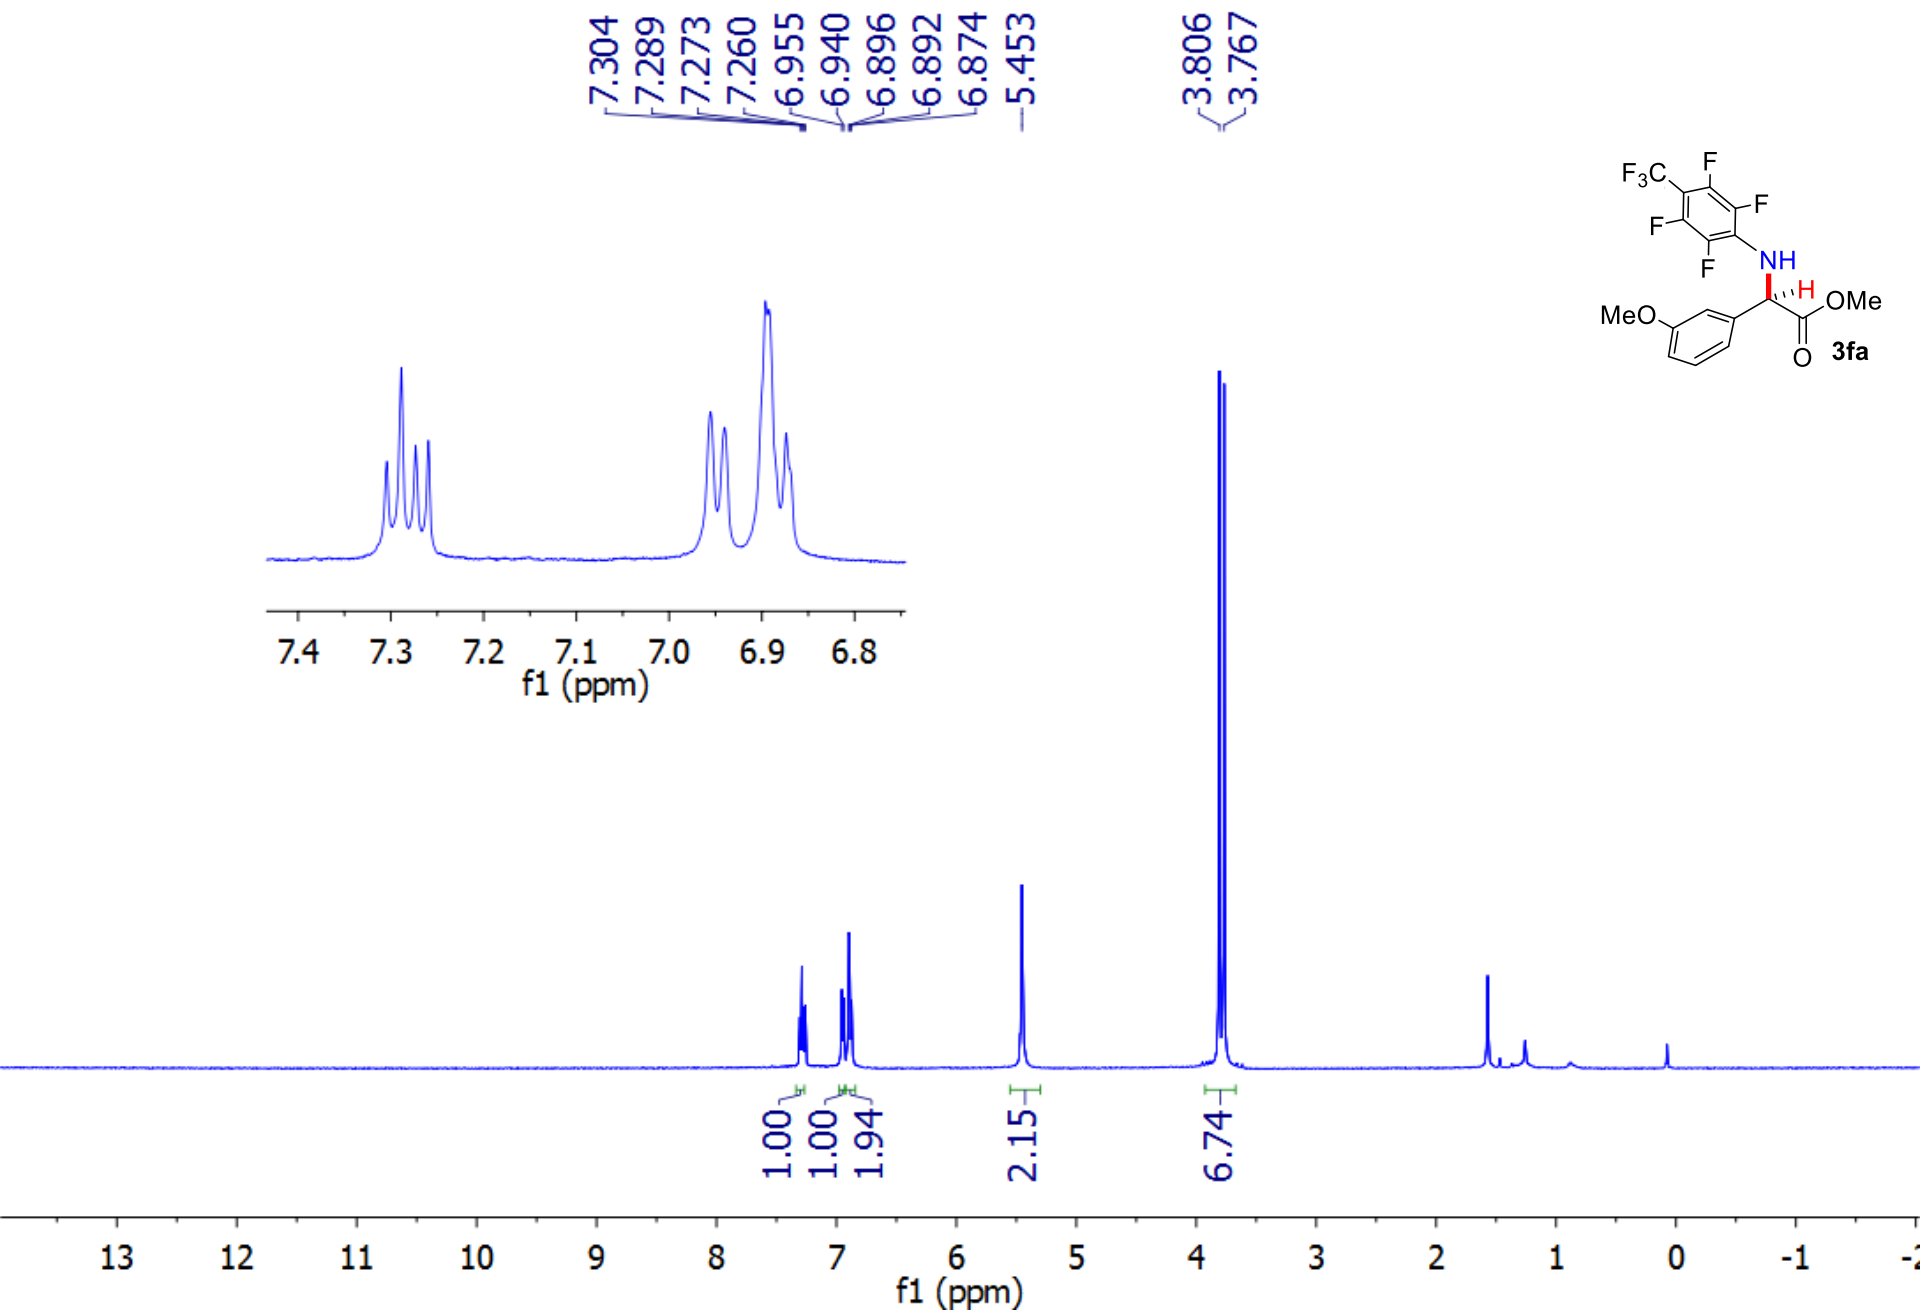

<sup>13</sup>C NMR

-171.183  
-160.091  
145.867  
137.934  
136.049  
135.928  
130.263  
129.060  
119.085  
114.275  
112.791  
97.732  
97.487  
77.254  
77.000  
76.746  
60.506  
60.473  
60.440  
55.298  
53.236

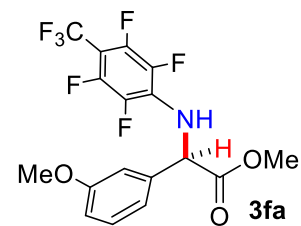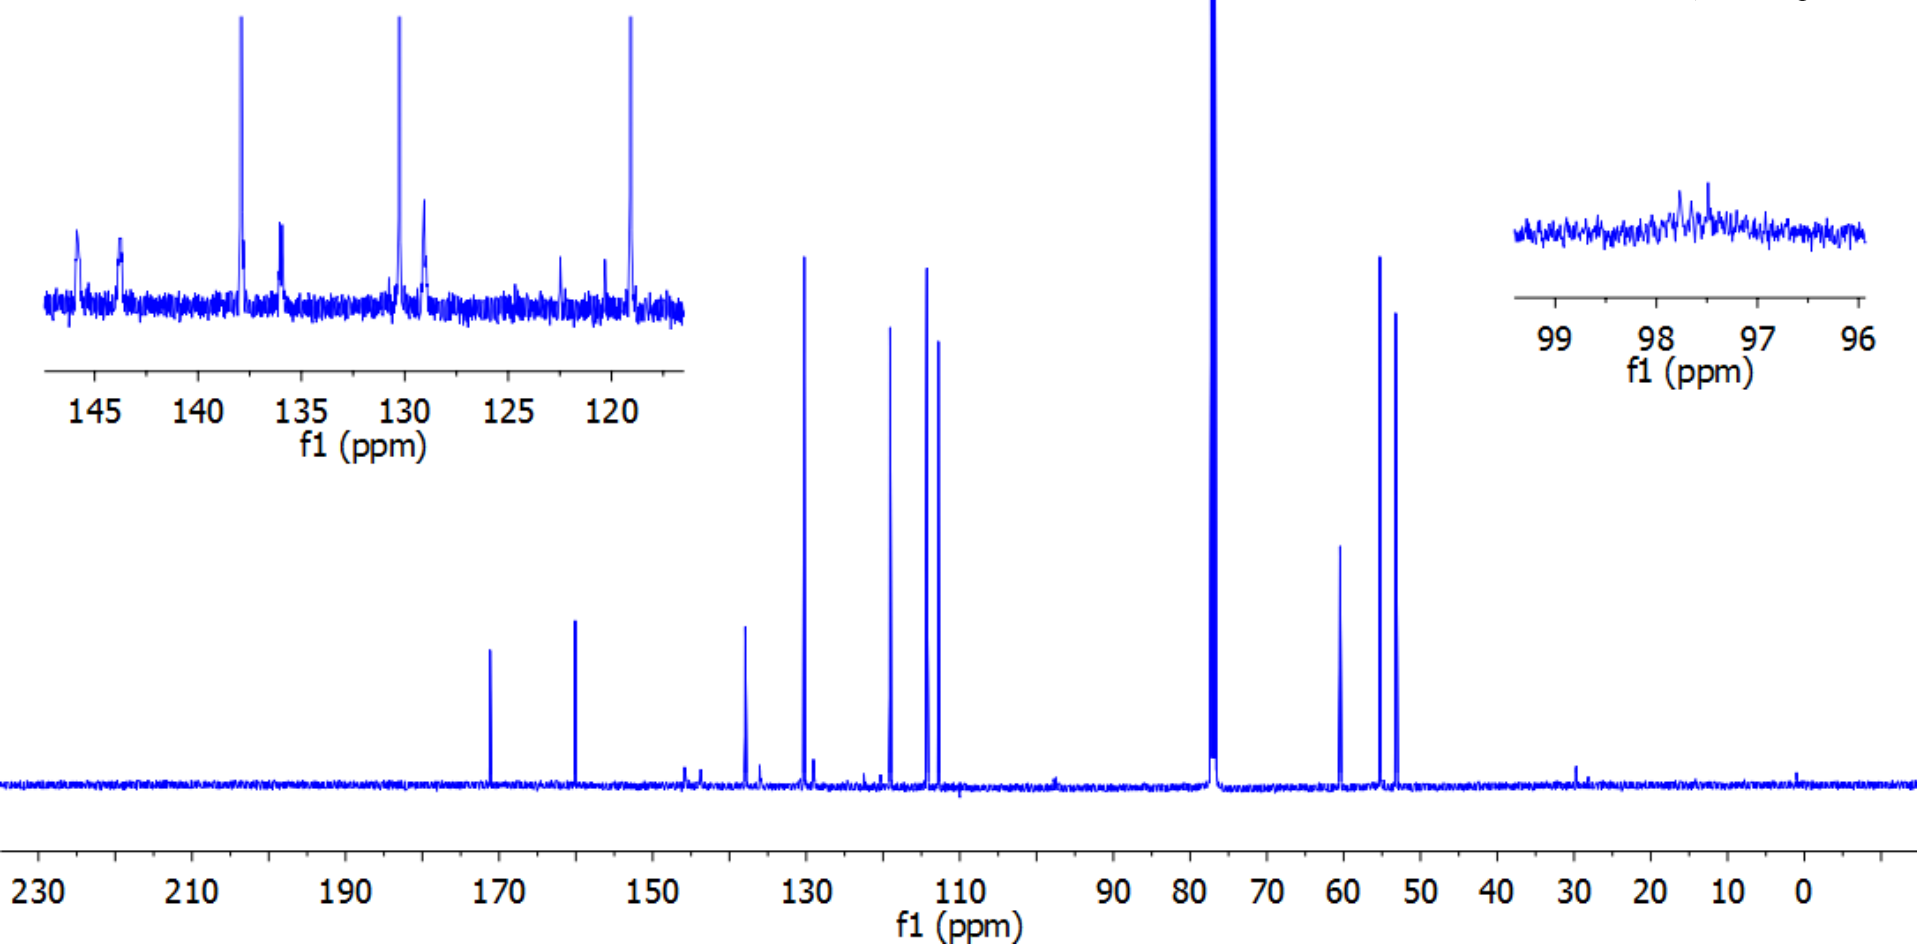

# $^{19}\text{F}$ NMR

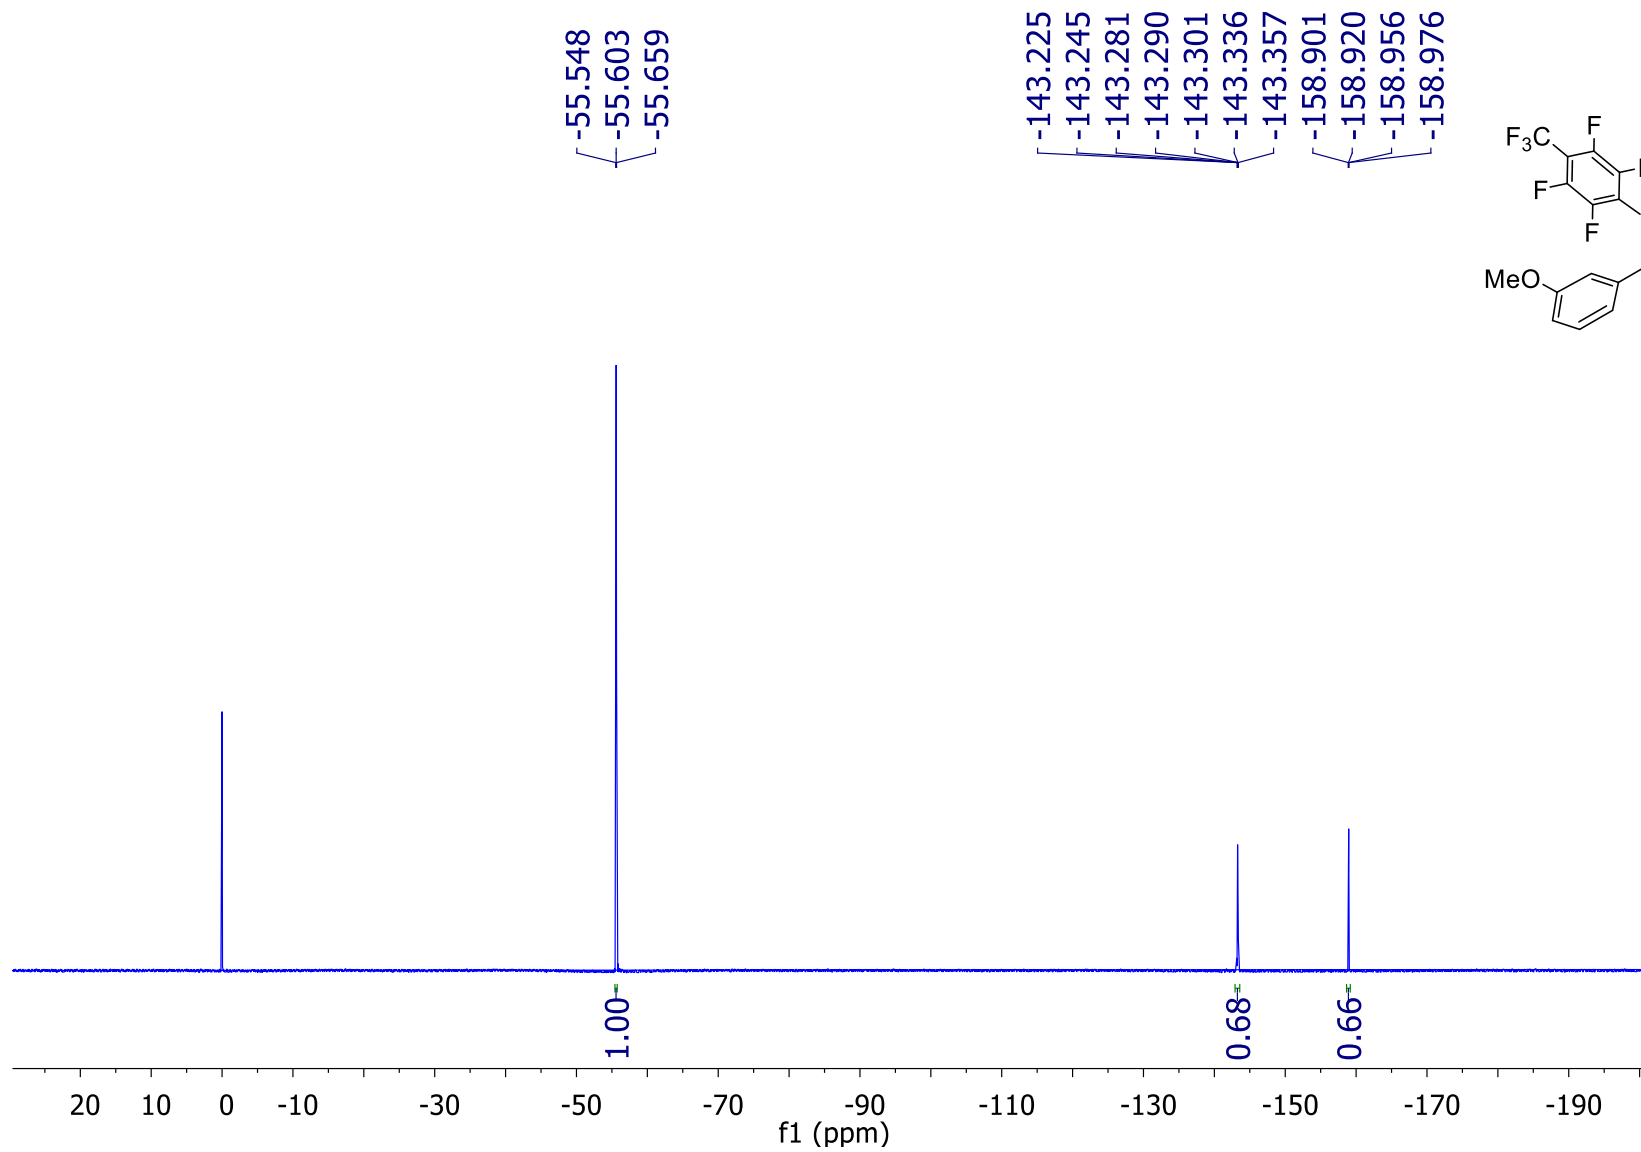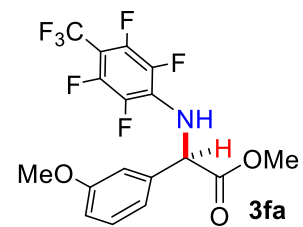

# HPLC

JLM-V-209-1-ADH-1%1ML

C:\EZStart\Projects\Default\Method\shifatest\_2,5-dimehoxy.met

C:\EZStart\Projects\Default\Data\JLM-V-209-1-ADH1%1ML

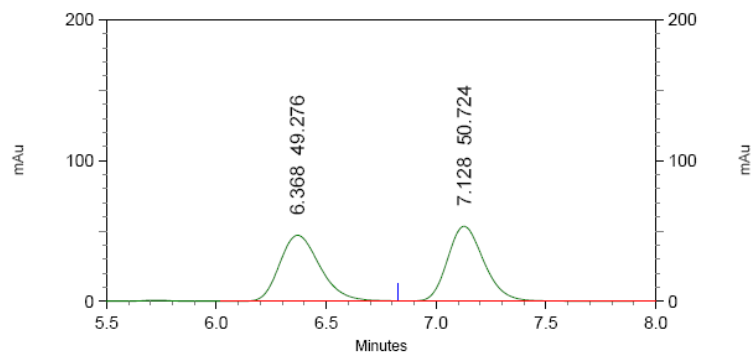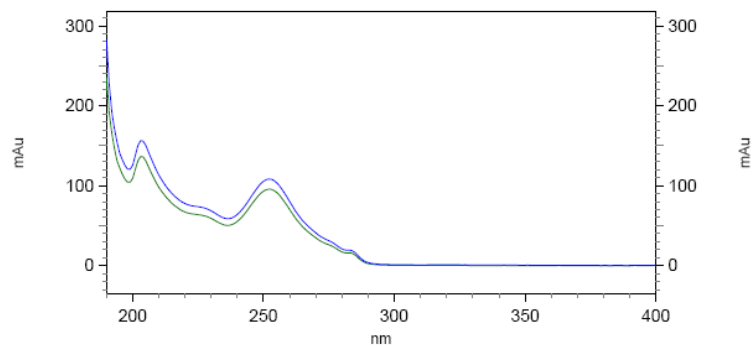

7: 251 nm, 4 nm

Results

| Pk #   | Name | Retention Time | Area Percent |
|--------|------|----------------|--------------|
| 1      |      | 6.368          | 49.276       |
| 2      |      | 7.128          | 50.724       |
| Totals |      |                | 100.000      |

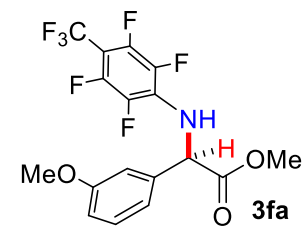

# HPLC

JLM-V-209-2-ADH-1%1ML

C:\EZStart\Projects\Default\Method\shifatest\_2,5-dimehoxy.met

C:\EZStart\Projects\Default\Data\JLM-V-209-2-ADH1%1ML

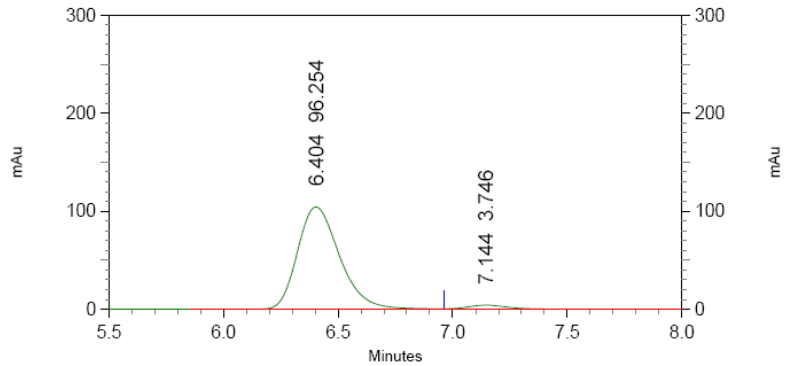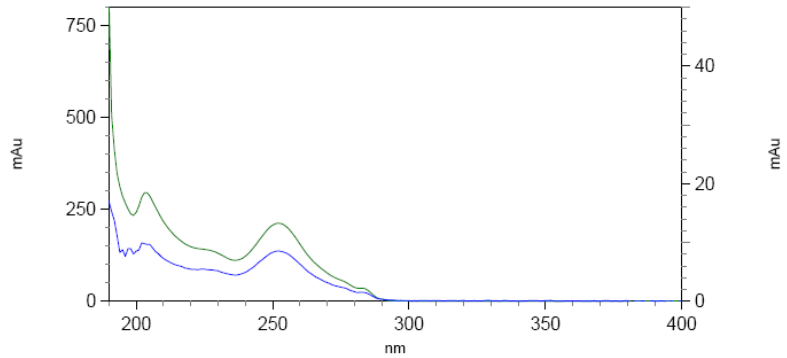

7: 251 nm, 4 nm

Results

| Pk # | Name | Retention Time | Area Percent |
|------|------|----------------|--------------|
| 1    |      | 6.404          | 96.254       |
| 2    |      | 7.144          | 3.746        |

| Totals | Area Percent |
|--------|--------------|
|        | 100.000      |

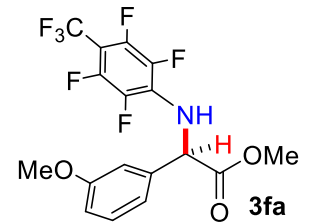

# <sup>1</sup>H NMR

7.341  
7.339  
7.337  
7.336  
7.324  
7.321  
7.291  
7.287  
7.275  
7.272  
6.988  
6.986  
6.973  
6.971  
6.958  
6.956  
6.934  
6.932  
6.917  
5.693  
5.691  
5.693  
5.674  
5.674  
5.464  
5.446

3.867  
3.732

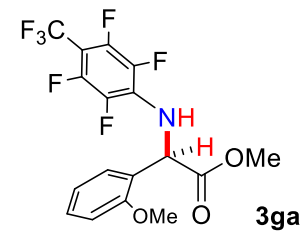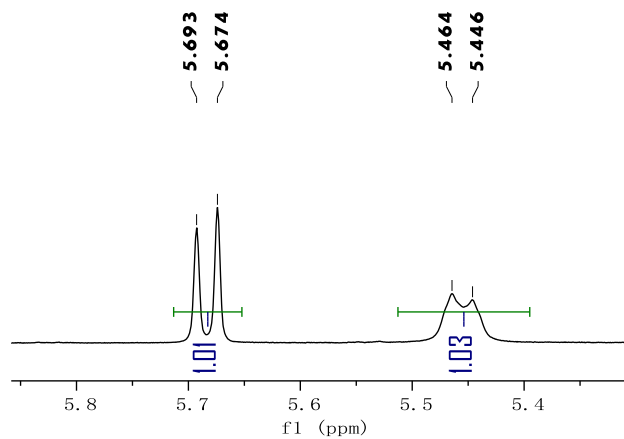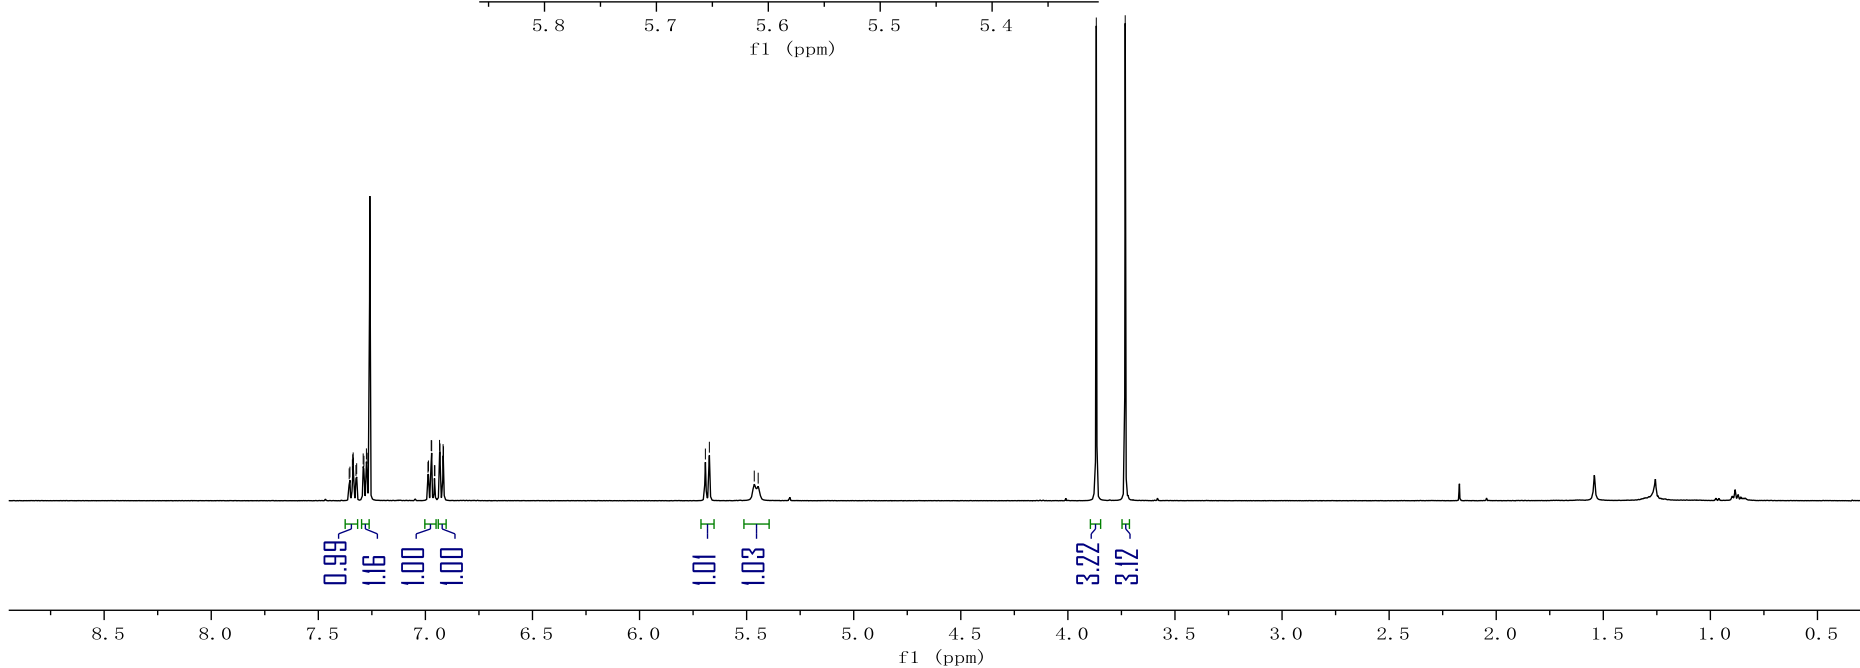

$^{13}\text{C}$  NMR

171.450  
156.989  
145.744  
138.154  
138.026  
136.228  
136.099  
130.366  
129.568  
124.921  
121.115  
111.381  
97.419

77.254  
77.000  
76.746  
57.733  
57.697  
57.662  
55.622  
52.927

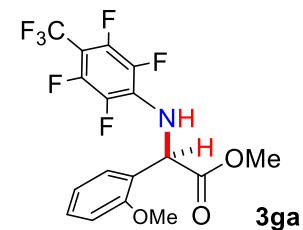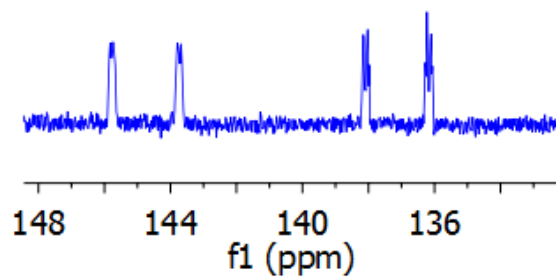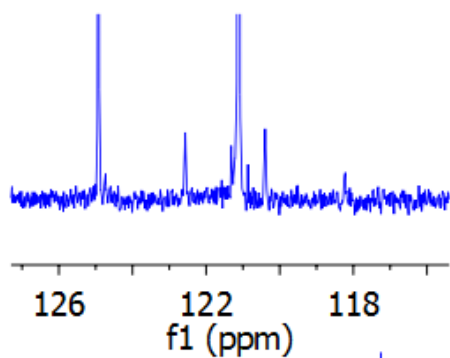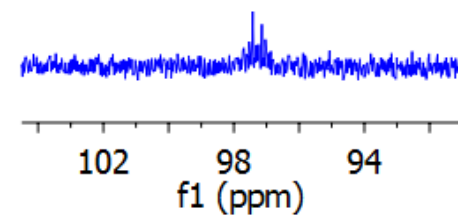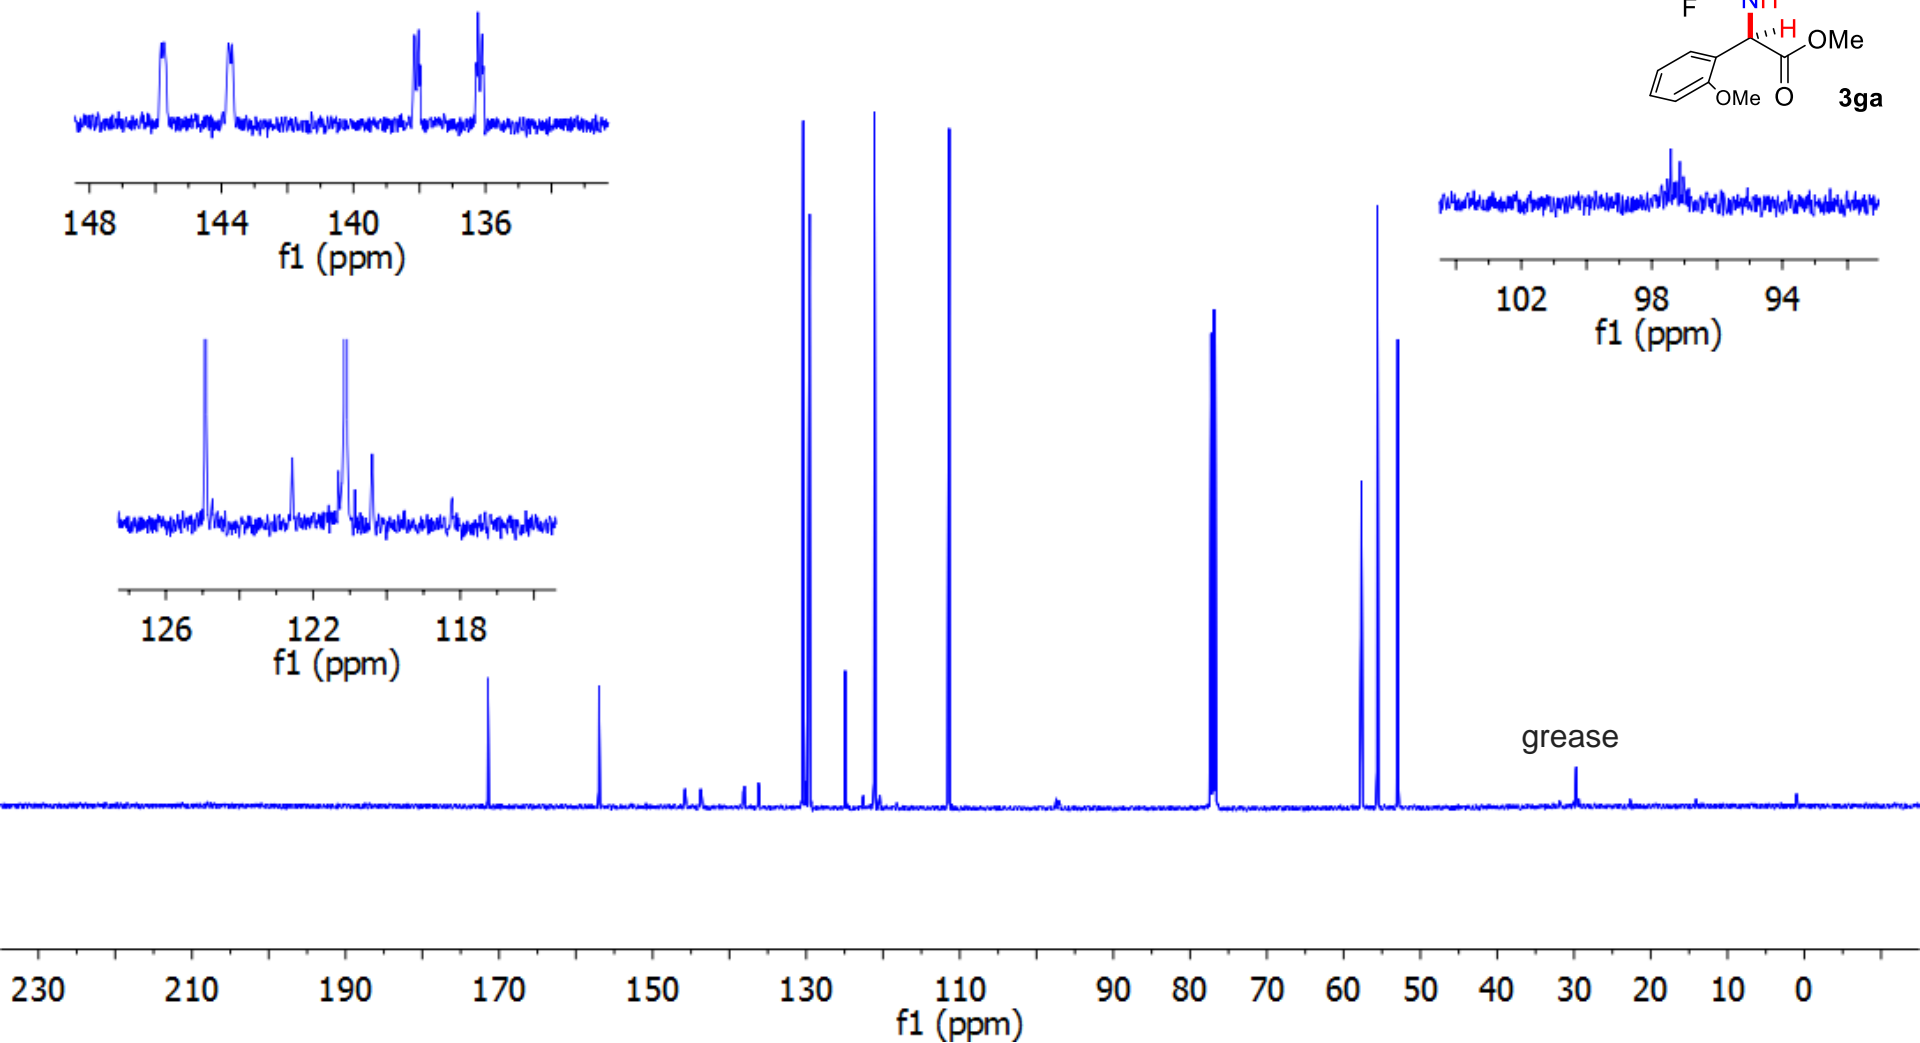

# $^{19}\text{F}$ NMR

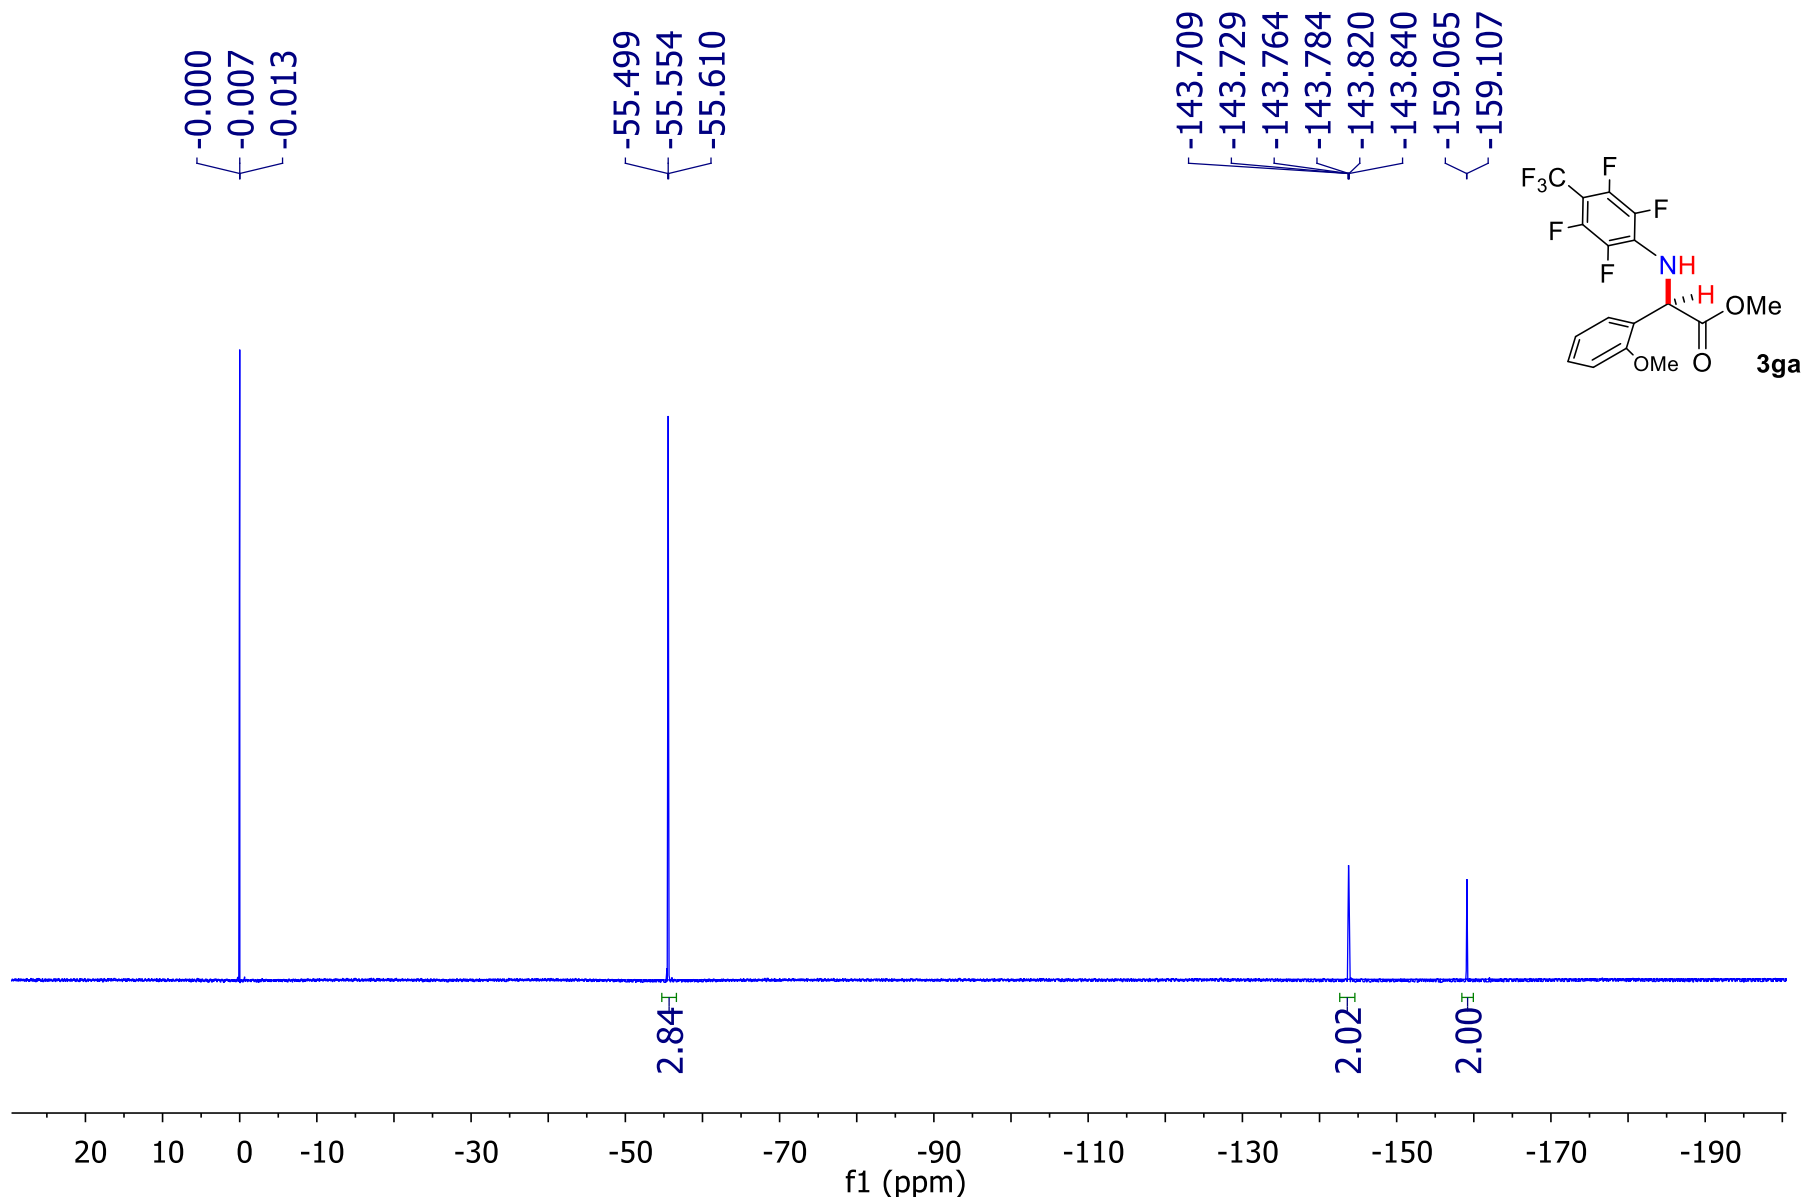



# HPLC

JLM-II-207-1-Whelk-0.5@-1mL  
C:\EZStart\Projects\Default\Method\XC-5%-ADH1ml.met  
E:\JLM-II-207-1-Whelk-0.5 @1ml

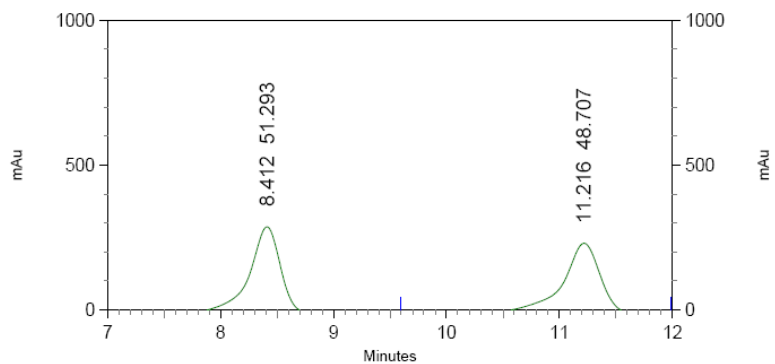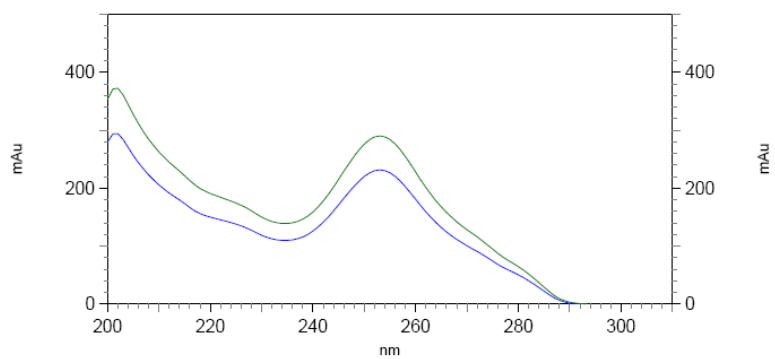

4: 254 nm, 4 nm

Results

| Name | Retention Time | Area Percent | Pk # |
|------|----------------|--------------|------|
|      | 8.412          | 51.293       | 1    |
|      | 11.216         | 48.707       | 2    |

|        |         |
|--------|---------|
| Totals | 100.000 |
|--------|---------|

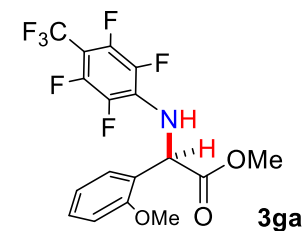

# HPLC

JLM-V-198-1-WHELK-0.5@-1mL  
 C:\EZStart\Projects\Default\Method\XC-5%-ADH1ml.met  
 E:\JLM-V-198-1-WHELK0.5@1ml

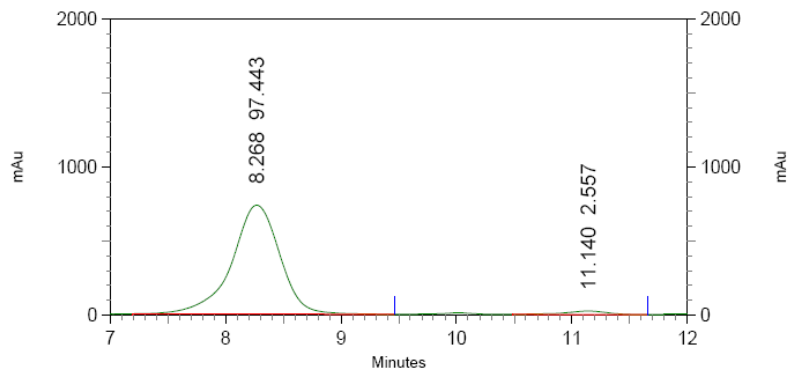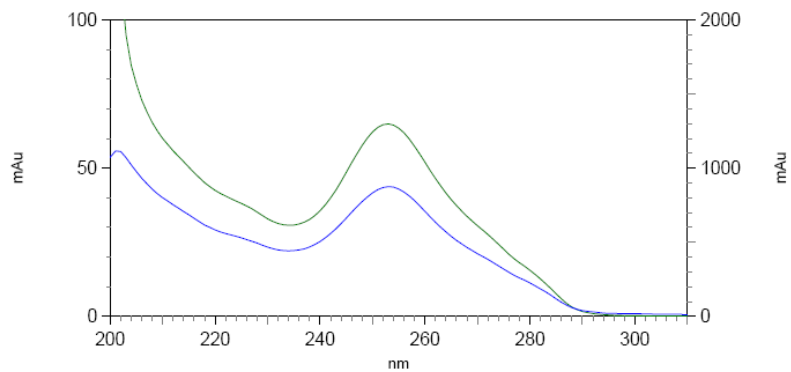

4: 284 nm, 4 nm

Results

| Name | Retention Time | Area Percent | Pk # |
|------|----------------|--------------|------|
|      | 8.268          | 97.443       | 1    |
|      | 11.140         | 2.557        | 2    |

|        |  |         |  |
|--------|--|---------|--|
| Totals |  | 100.000 |  |
|--------|--|---------|--|

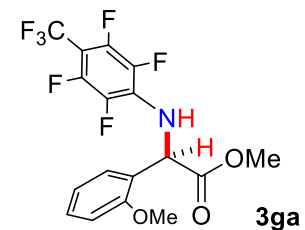

# <sup>1</sup>H NMR

7.260  
7.244  
7.185  
7.169

5.455  
5.438

-3.755

-2.341

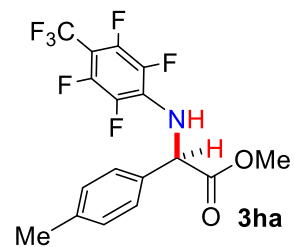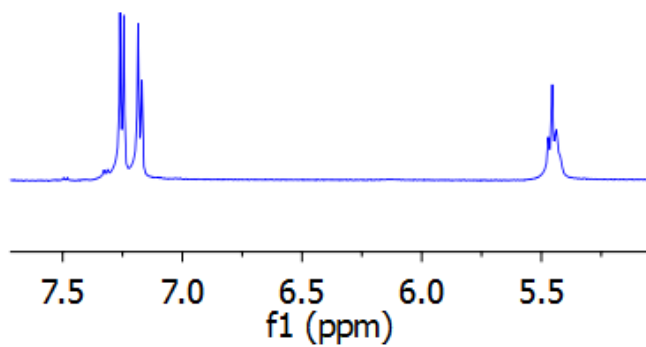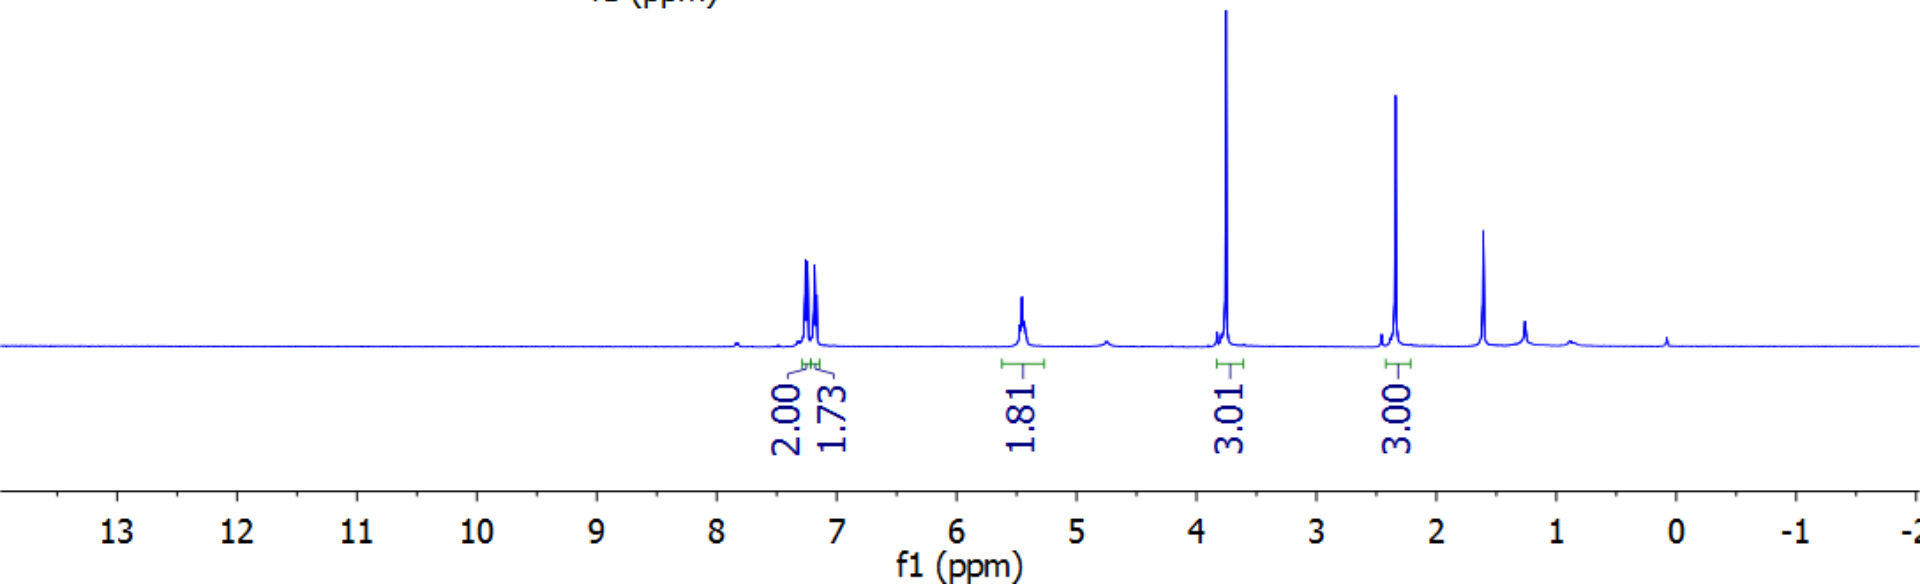

# $^{13}\text{C}$ NMR

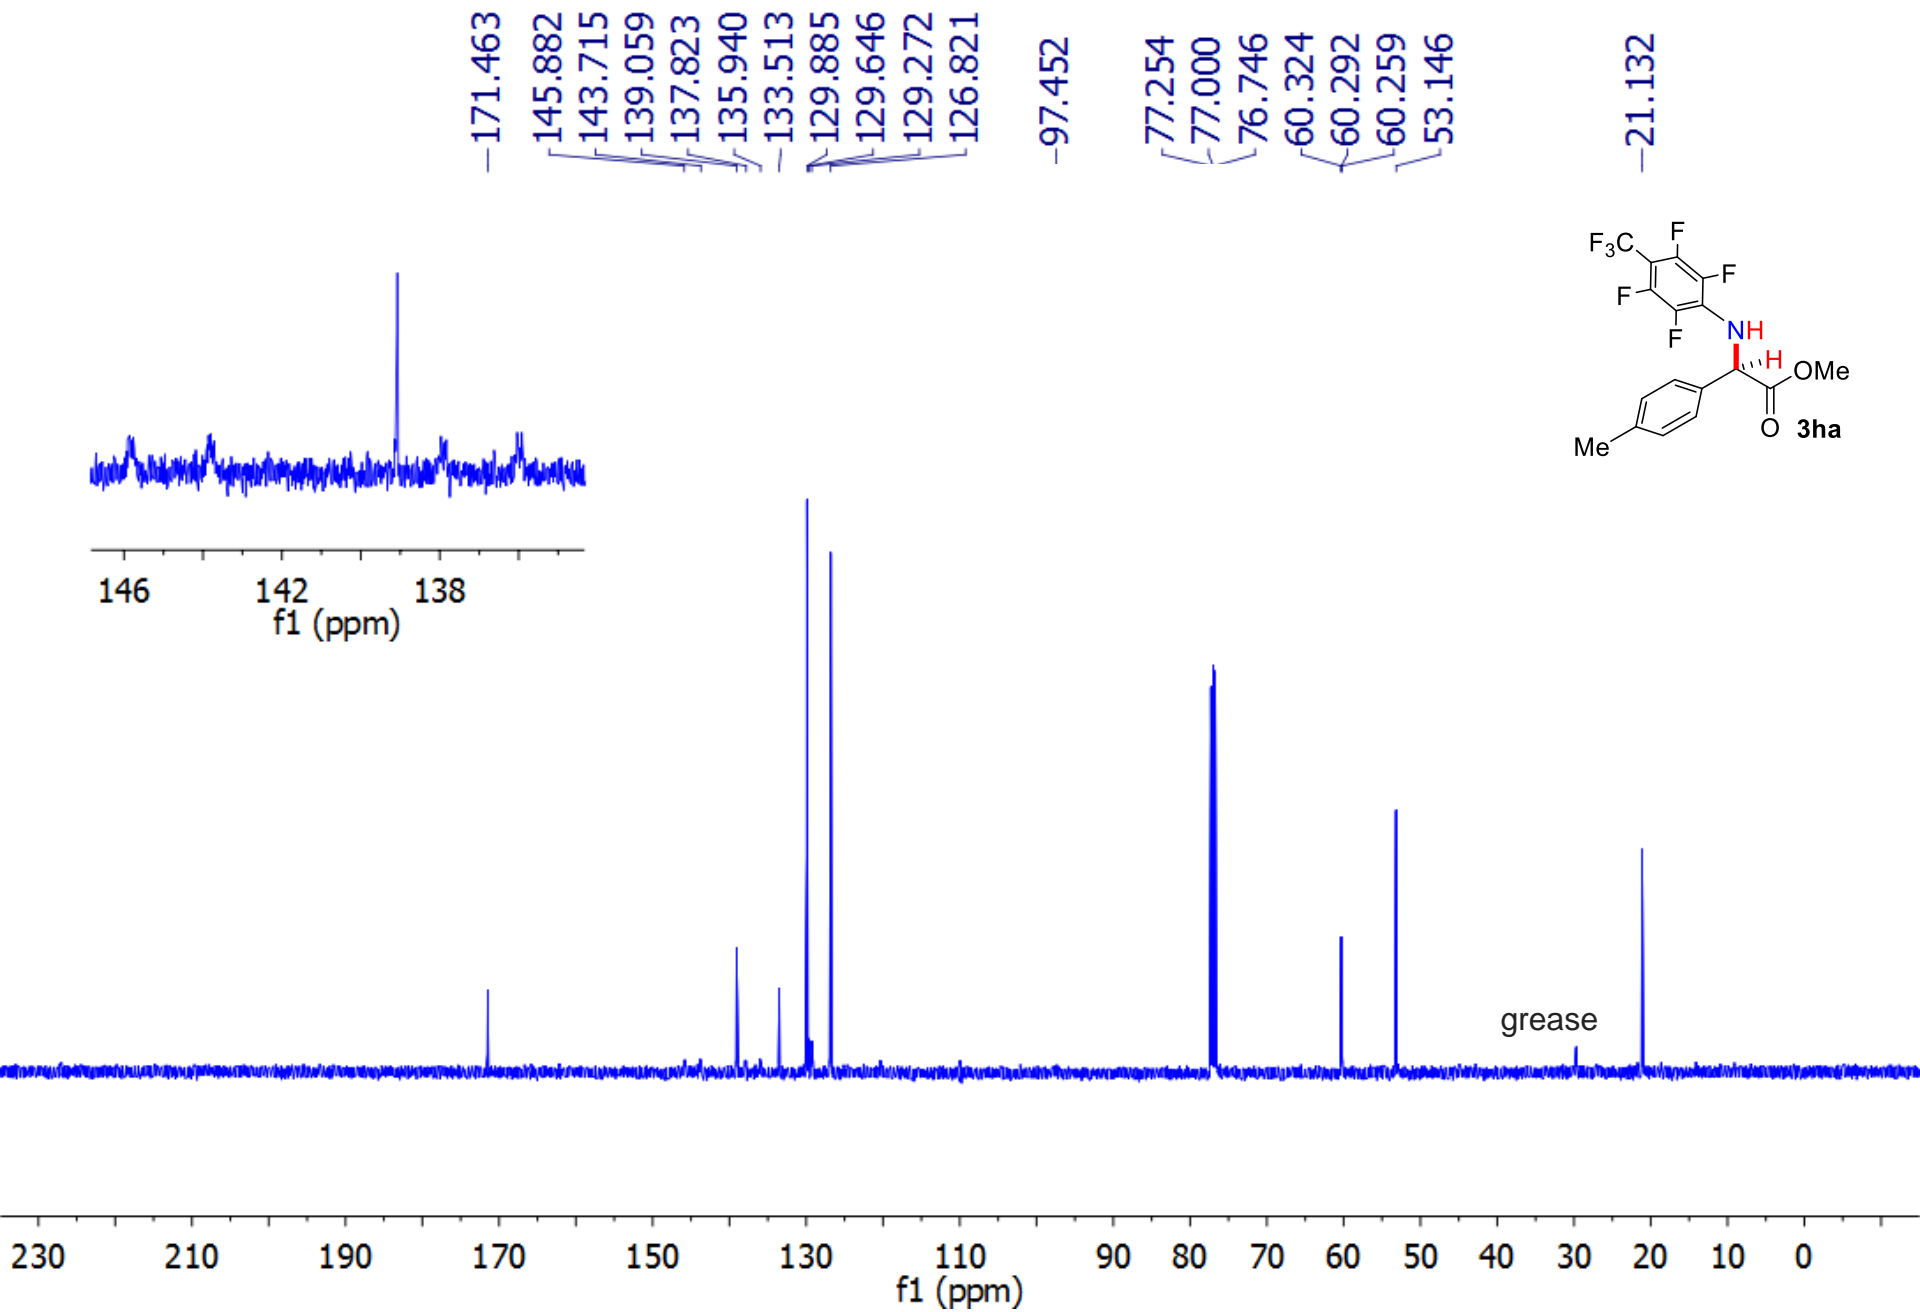

# $^{19}\text{F}$ NMR

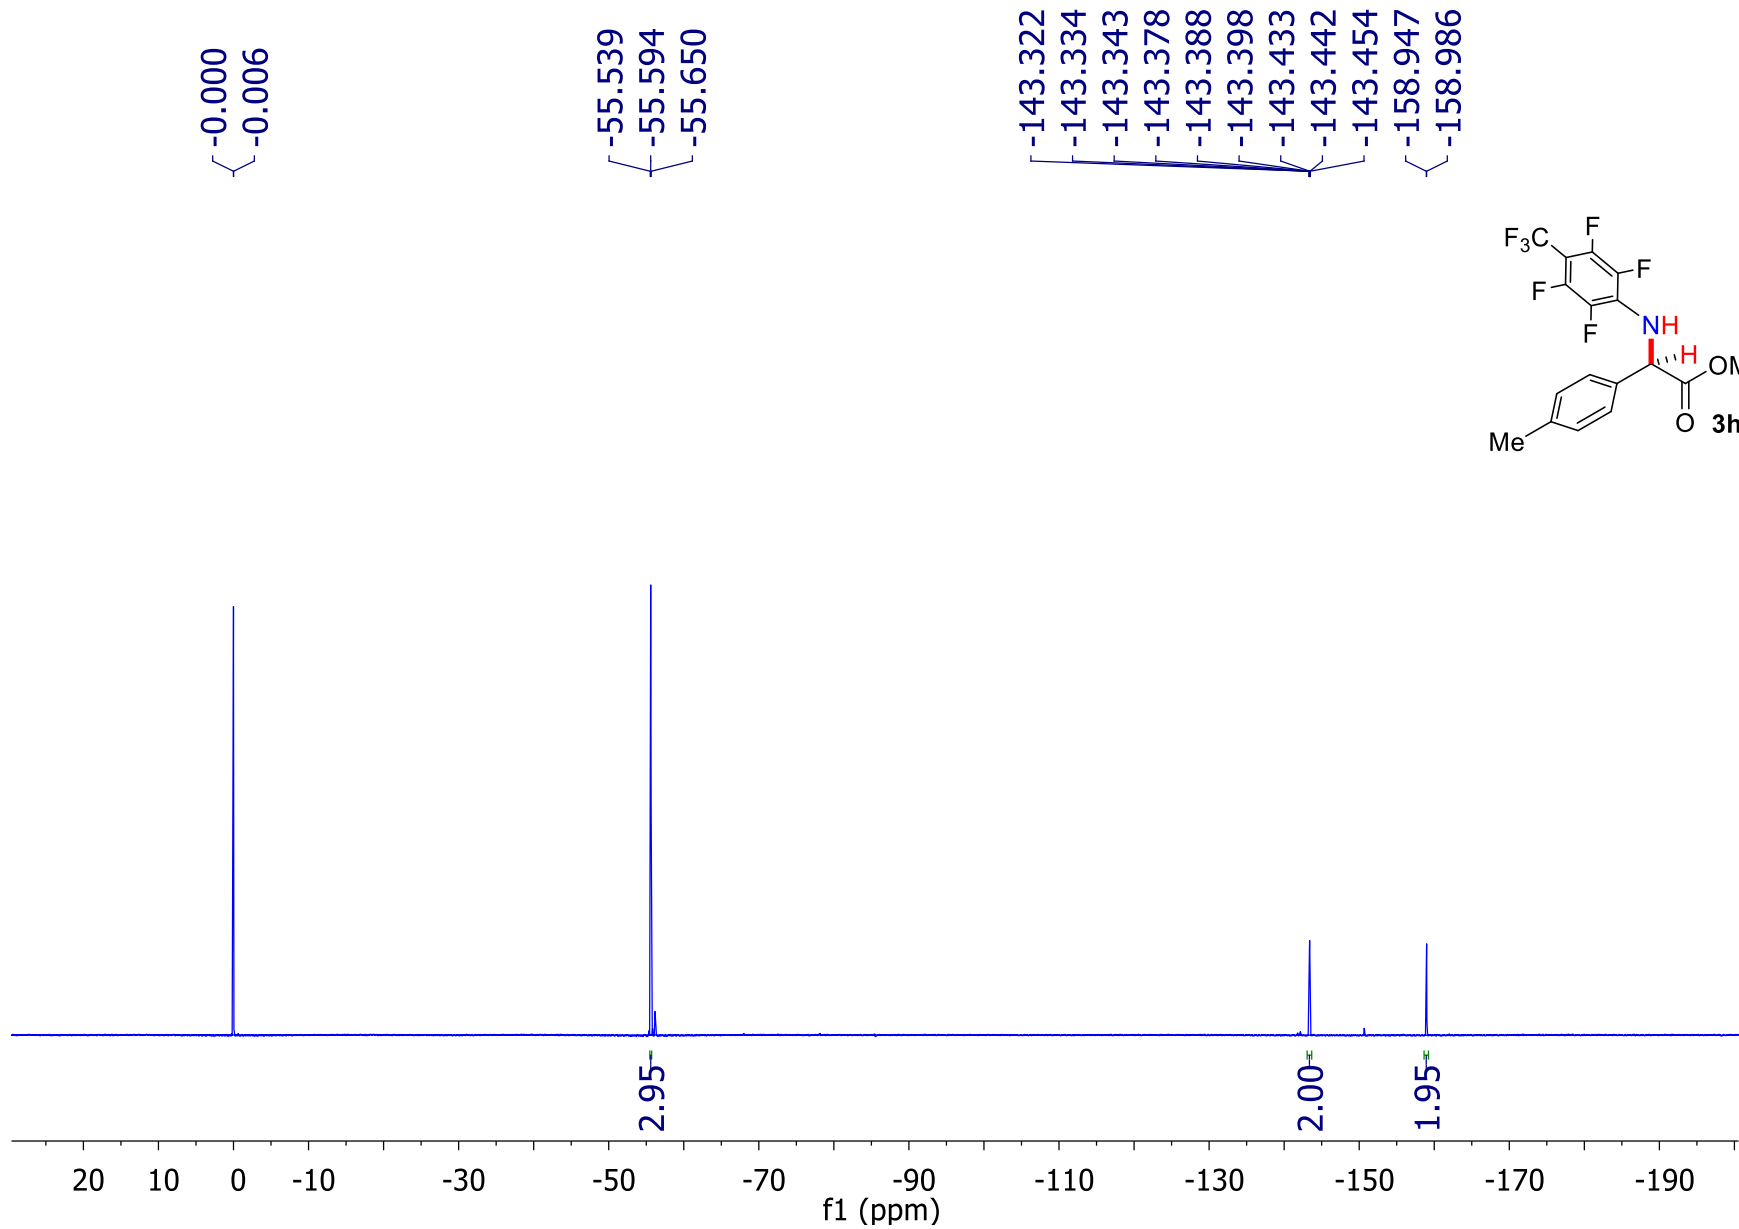

# HPLC

JLM-V-222-1a-OJH-1%1ML  
C:\EZStart\Projects\Default\Data\JLM-V-222-1a-OJH-1%1ML  
C:\EZStart\Projects\Default\Method\CQL-AD-H10%1.0ml60min.met  
AD-H column 20%IPA @ 0.8ml/min

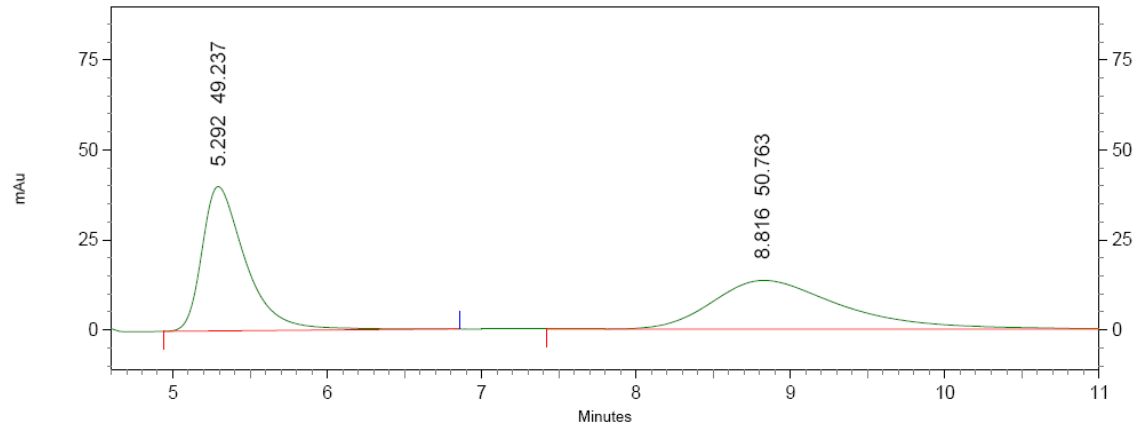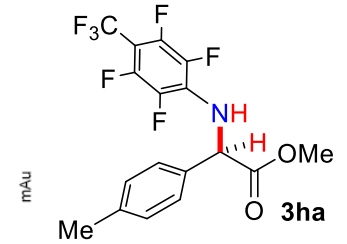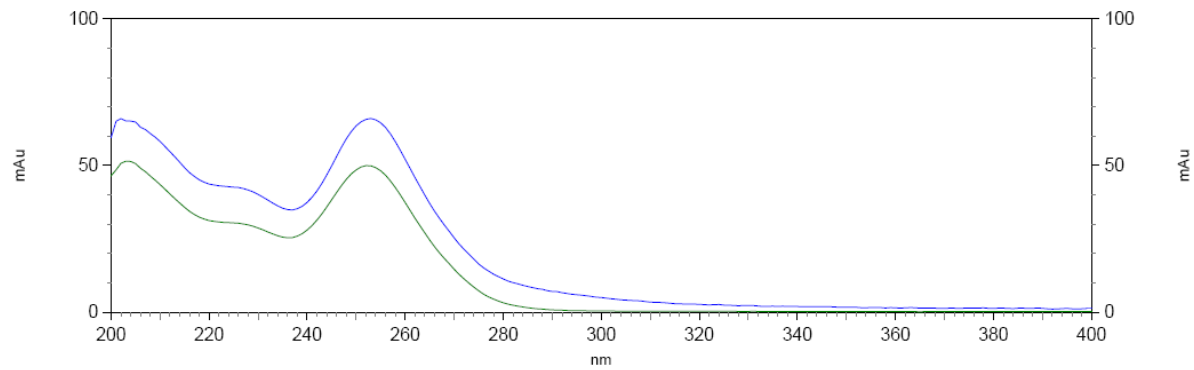

4: 259 nm, 4 nm Results

| Pk #   | Retention Time | Area Percent |
|--------|----------------|--------------|
| 1      | 5.292          | 49.237       |
| 2      | 8.816          | 50.763       |
| Totals |                | 100.000      |

# HPLC

JLM-V-222-2-OJH-1%1ML  
C:\EZStart\Projects\Default\Data\JLM-V-222-2-OJH-1%1ML  
C:\EZStart\Projects\Default\Method\CQL-AD-H10%1.0ml60min.met  
AD-H column 20%IPA @ 0.8ml/min

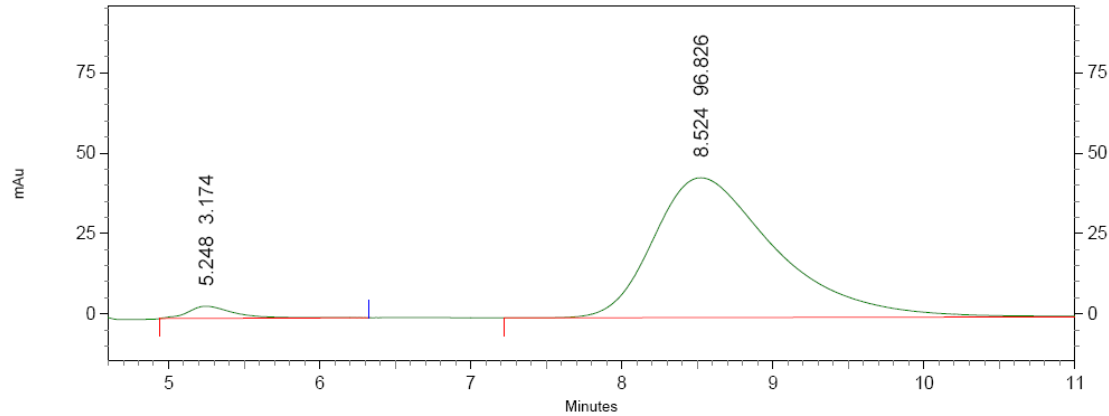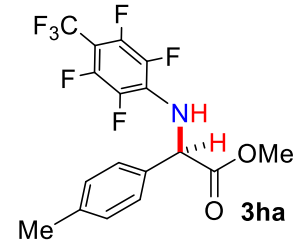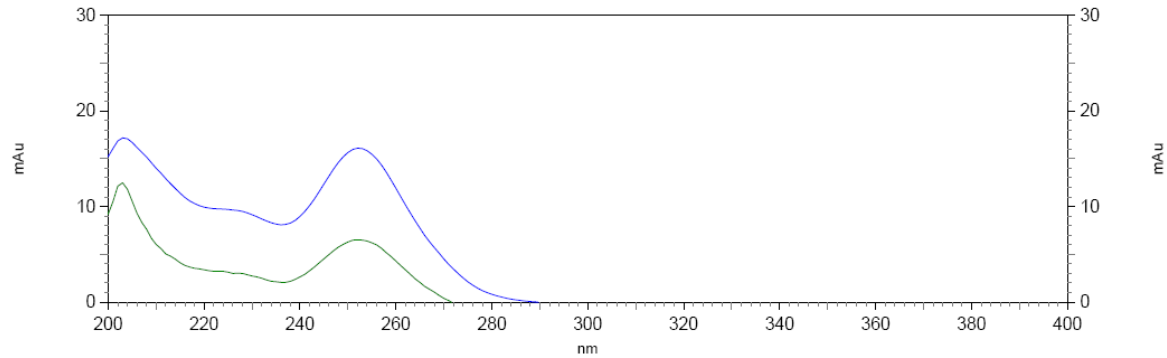

4: 259 nm, 4 nm Results

| Pk # | Retention Time | Area Percent |
|------|----------------|--------------|
| 1    | 5.248          | 3.174        |
| 2    | 8.524          | 96.826       |

|        |         |
|--------|---------|
| Totals | 100.000 |
|--------|---------|

# $^1\text{H}$ NMR

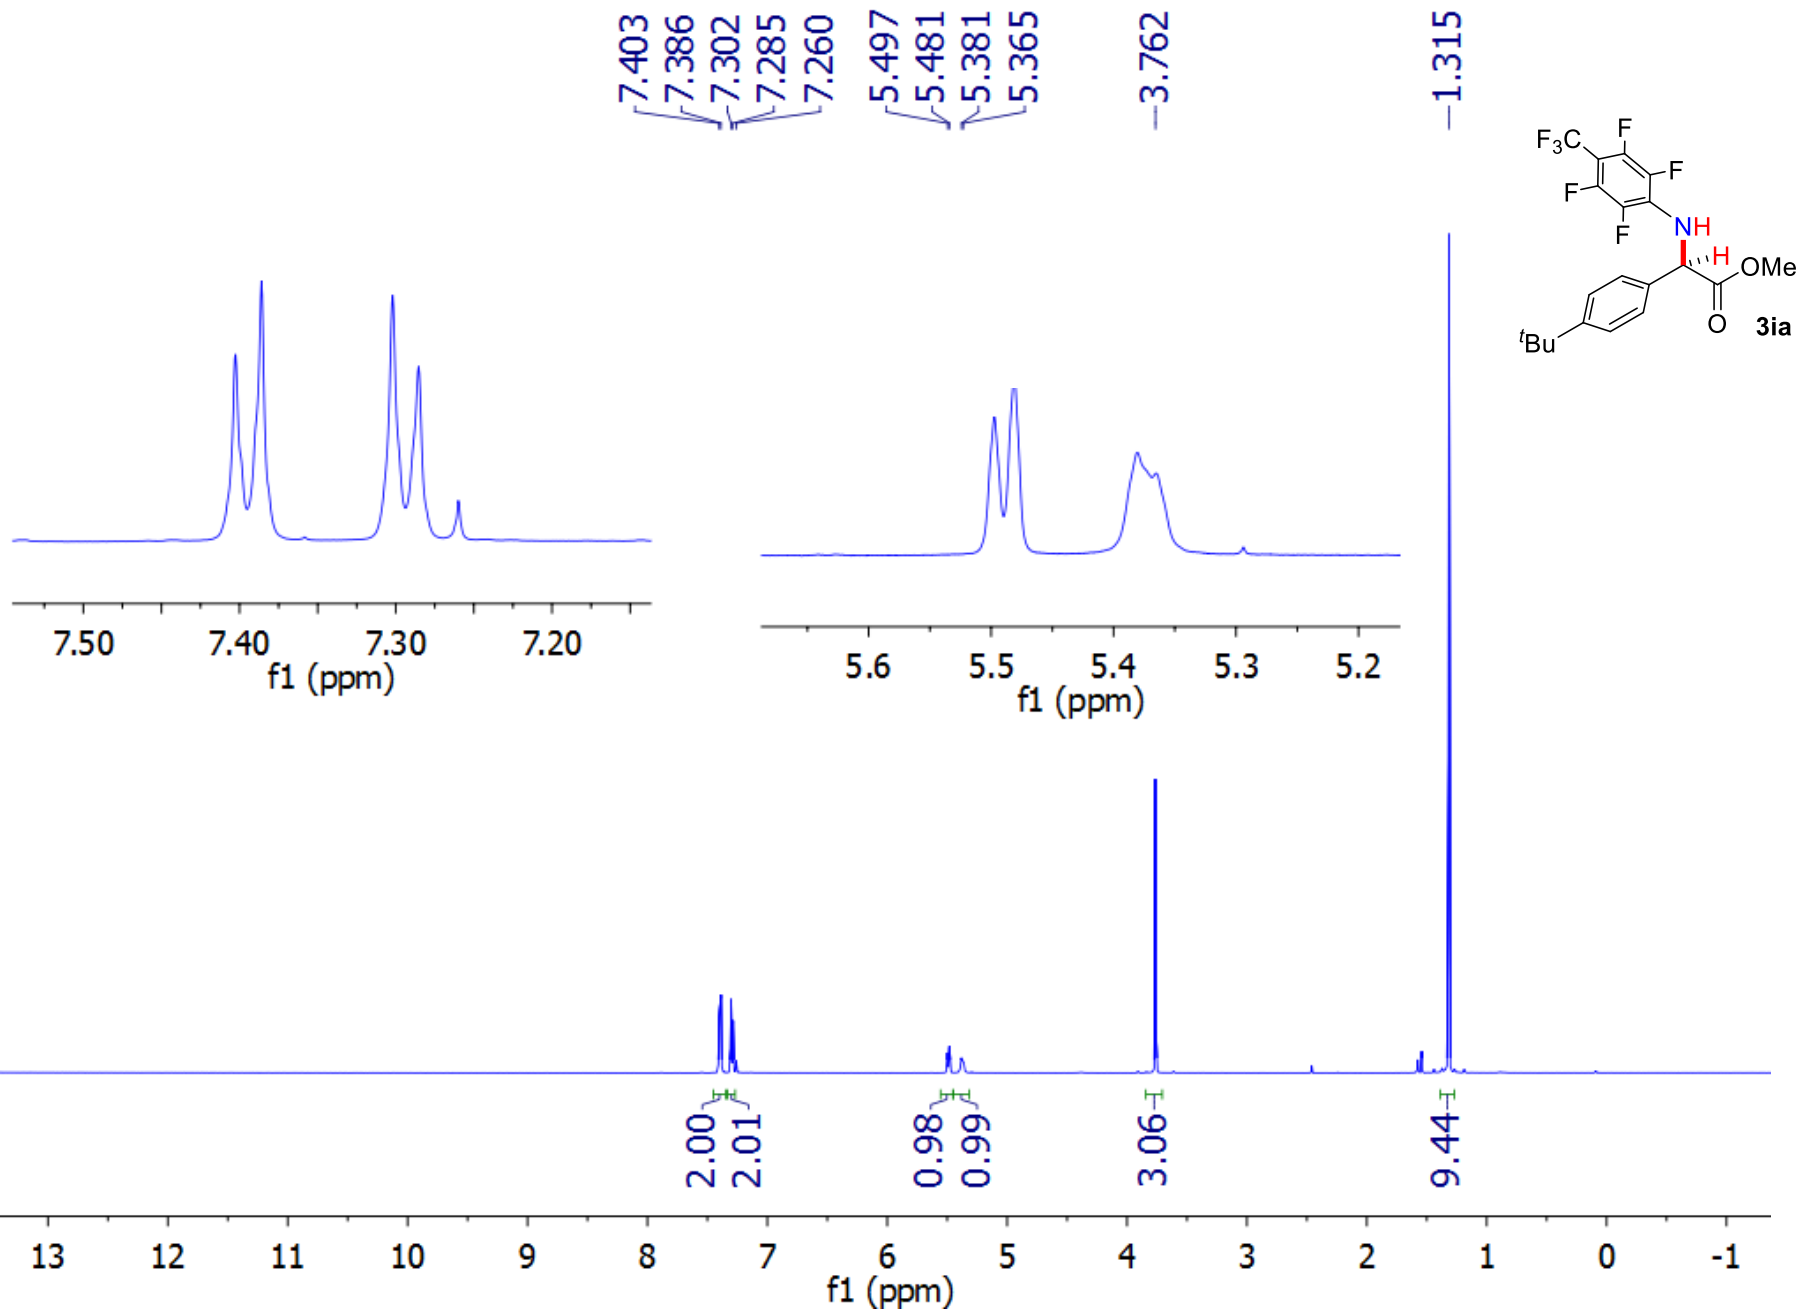



$^{13}\text{C}$  NMR

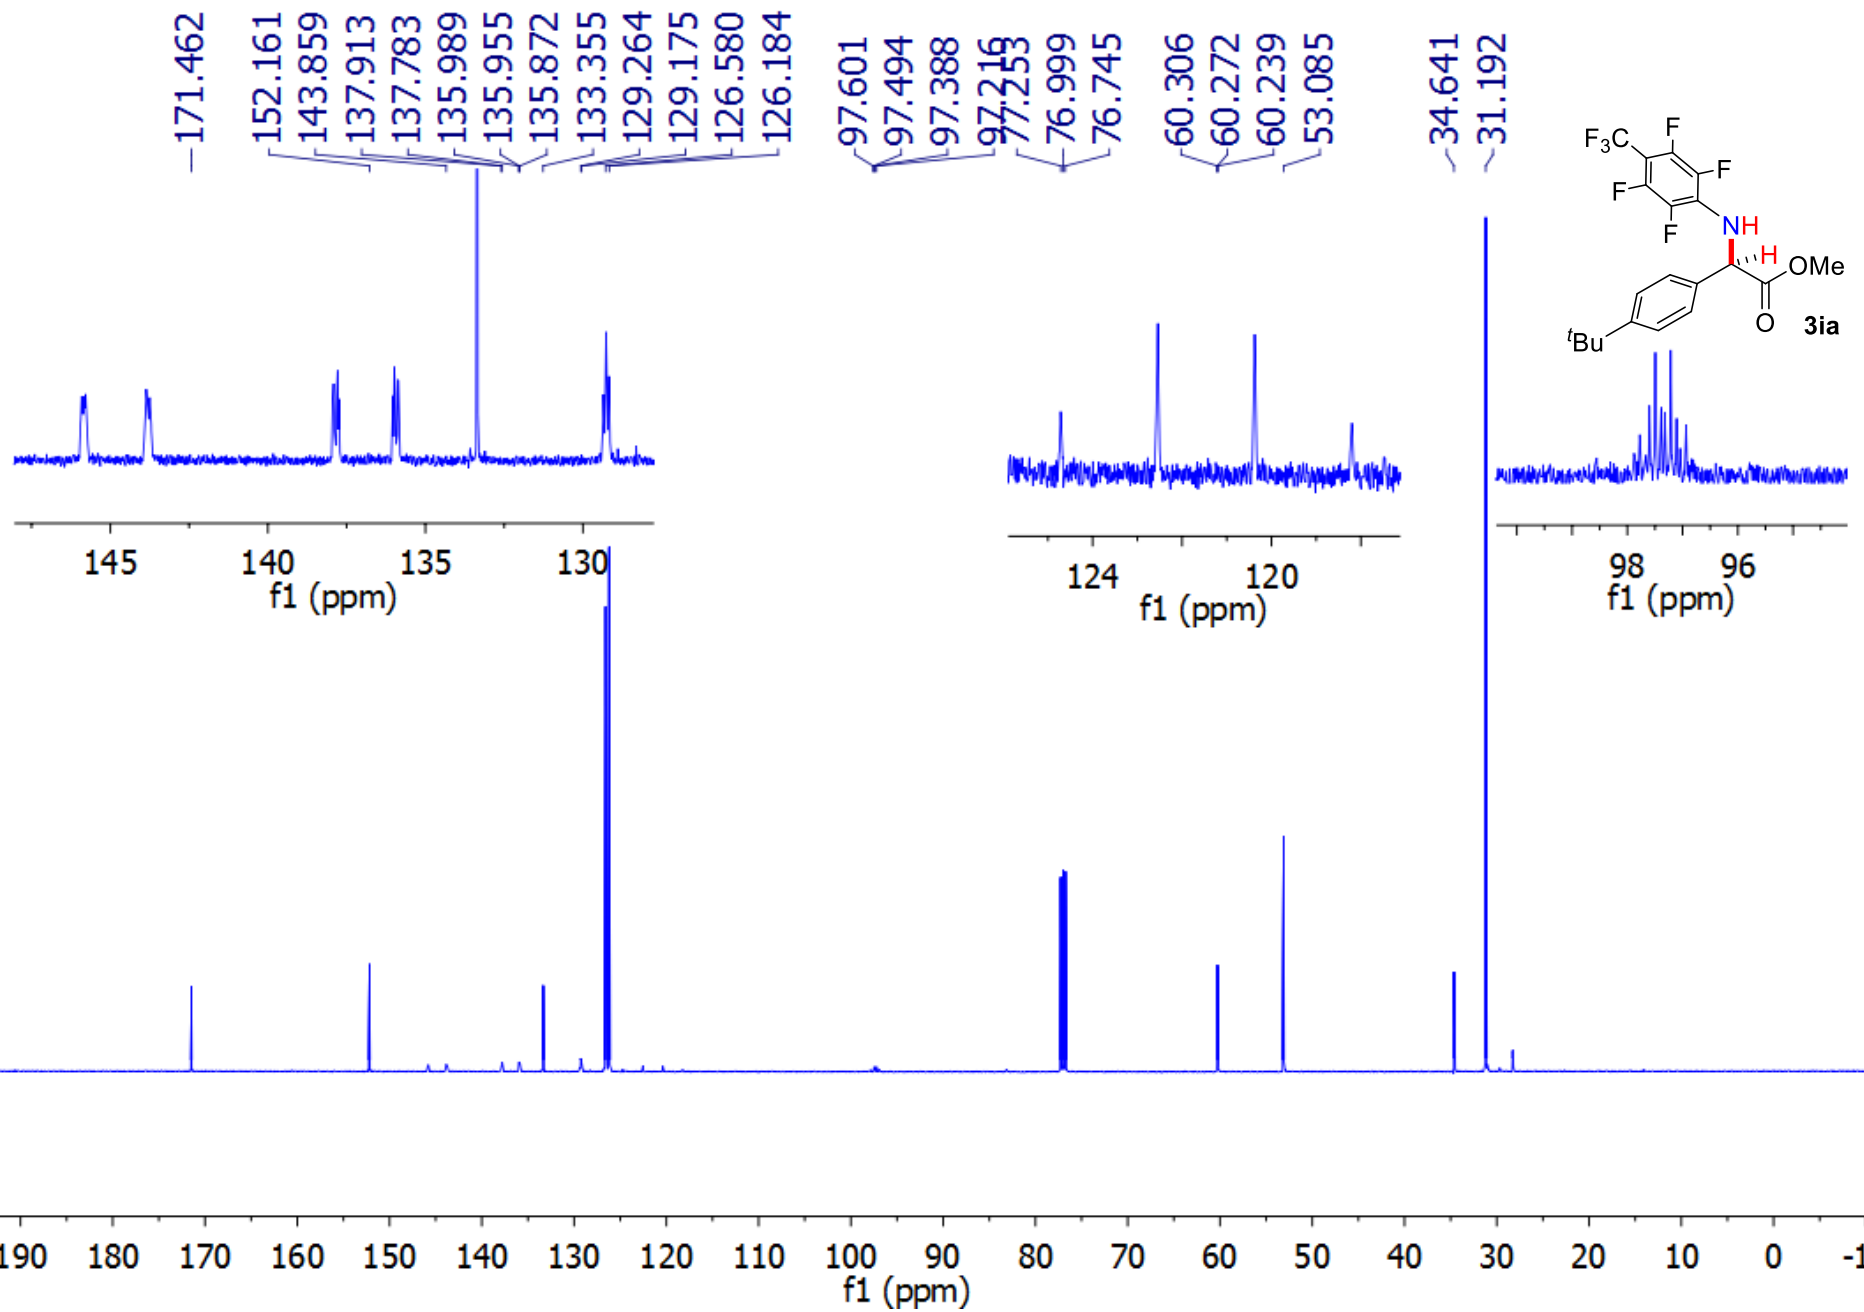

# <sup>19</sup>F NMR

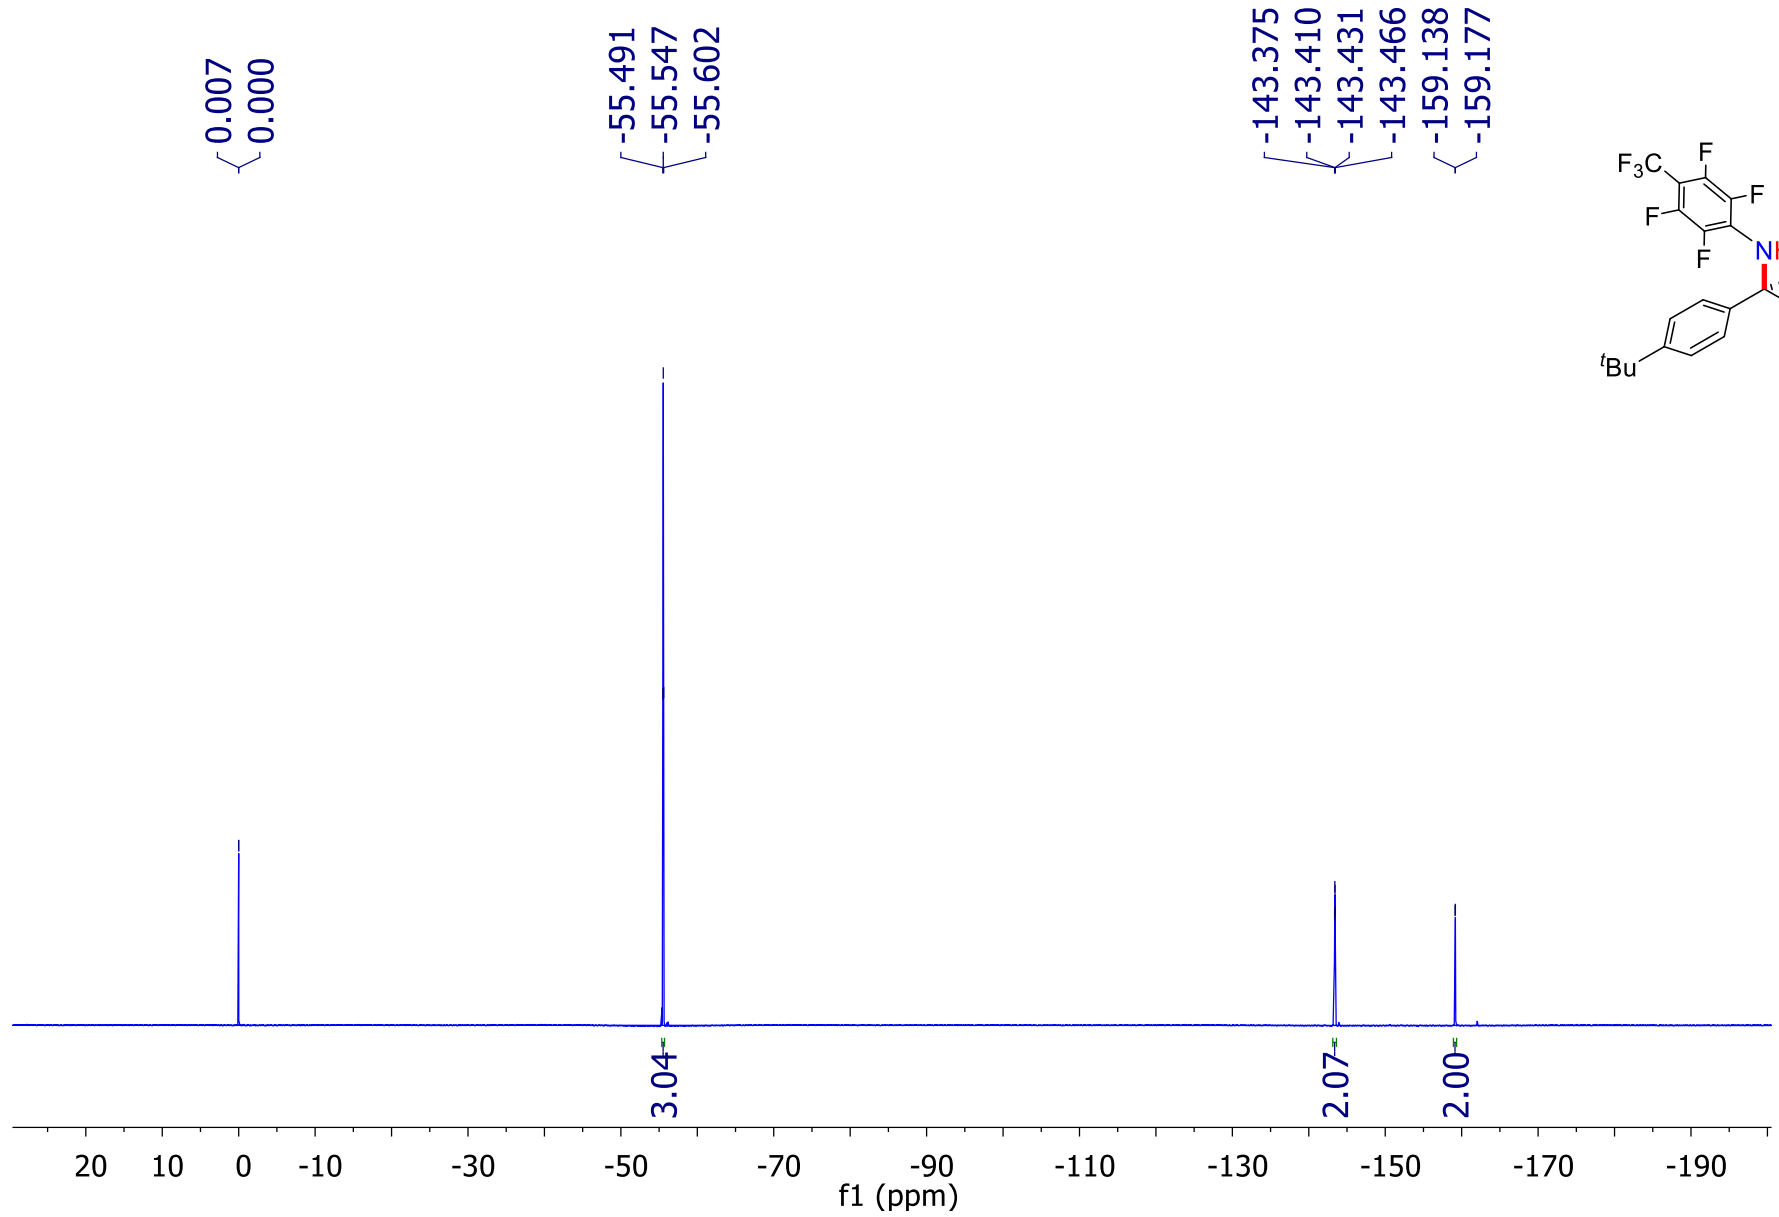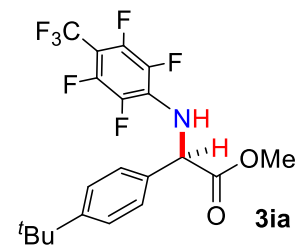

# HPLC

JLM-V-194-1C-whehk-0%0.8ML

C:\EZStart\Projects\Default\Method\LK-20%-0.8-90min.met

C:\EZStart\Projects\Default\Data\JLM-V-194-1C-whehk-0%0.8ML

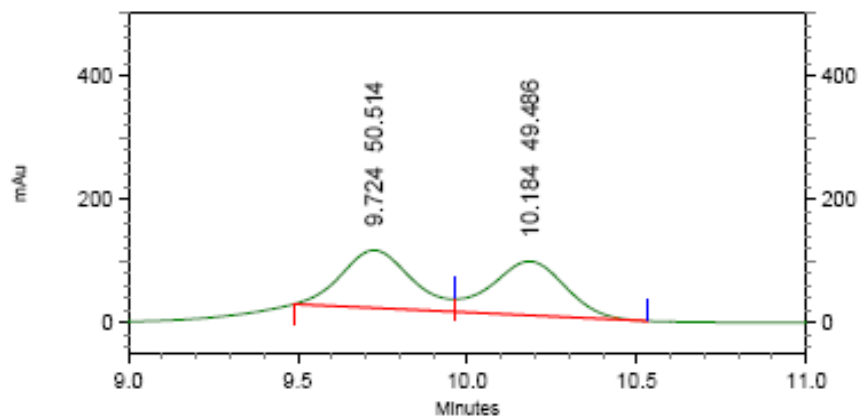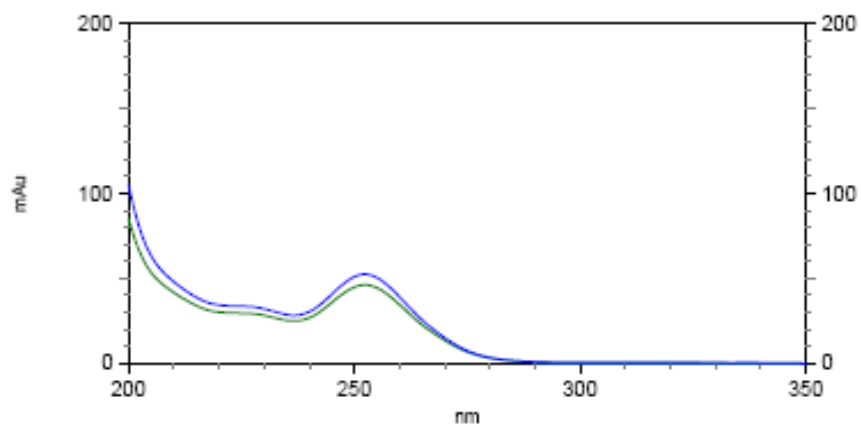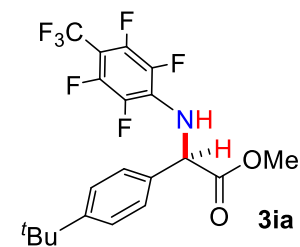

2: 252 nm, 4 nm

Results

| Name | Retention Time | Area Percent | Pk # |
|------|----------------|--------------|------|
|      | 9.724          | 50.514       | 1    |
|      | 10.184         | 49.486       | 2    |

|        |  |         |  |
|--------|--|---------|--|
| Totals |  | 100.000 |  |
|--------|--|---------|--|

# HPLC

JLM-V-194-2-whelk-0%0.8ML

C:\EZStart\Projects\Default\Method\LK-20%-0.8-90min.met

C:\EZStart\Projects\Default\Data\JLM-V-194-2-whelk-0%0.8ML

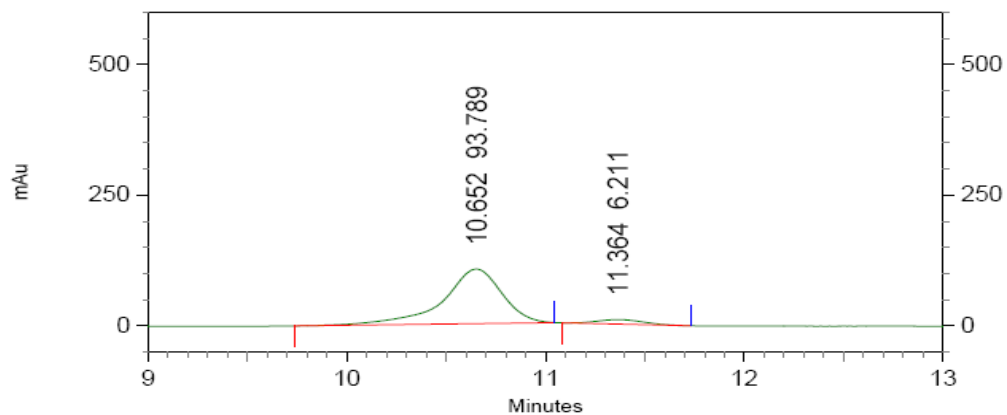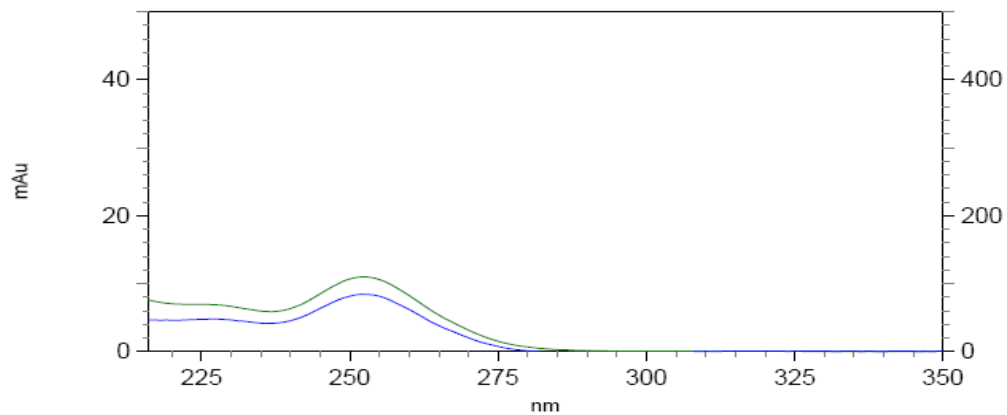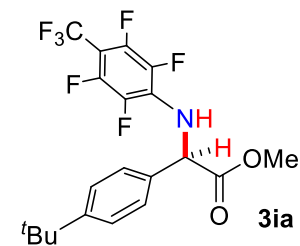

2: 253 nm, 4 nm

Results

| Name | Retention Time | Area Percent | Pk # |
|------|----------------|--------------|------|
|      | 10.652         | 93.789       | 1    |
|      | 11.364         | 6.211        | 2    |

|        |  |         |  |
|--------|--|---------|--|
| Totals |  | 100.000 |  |
|--------|--|---------|--|

# $^1\text{H}$ NMR

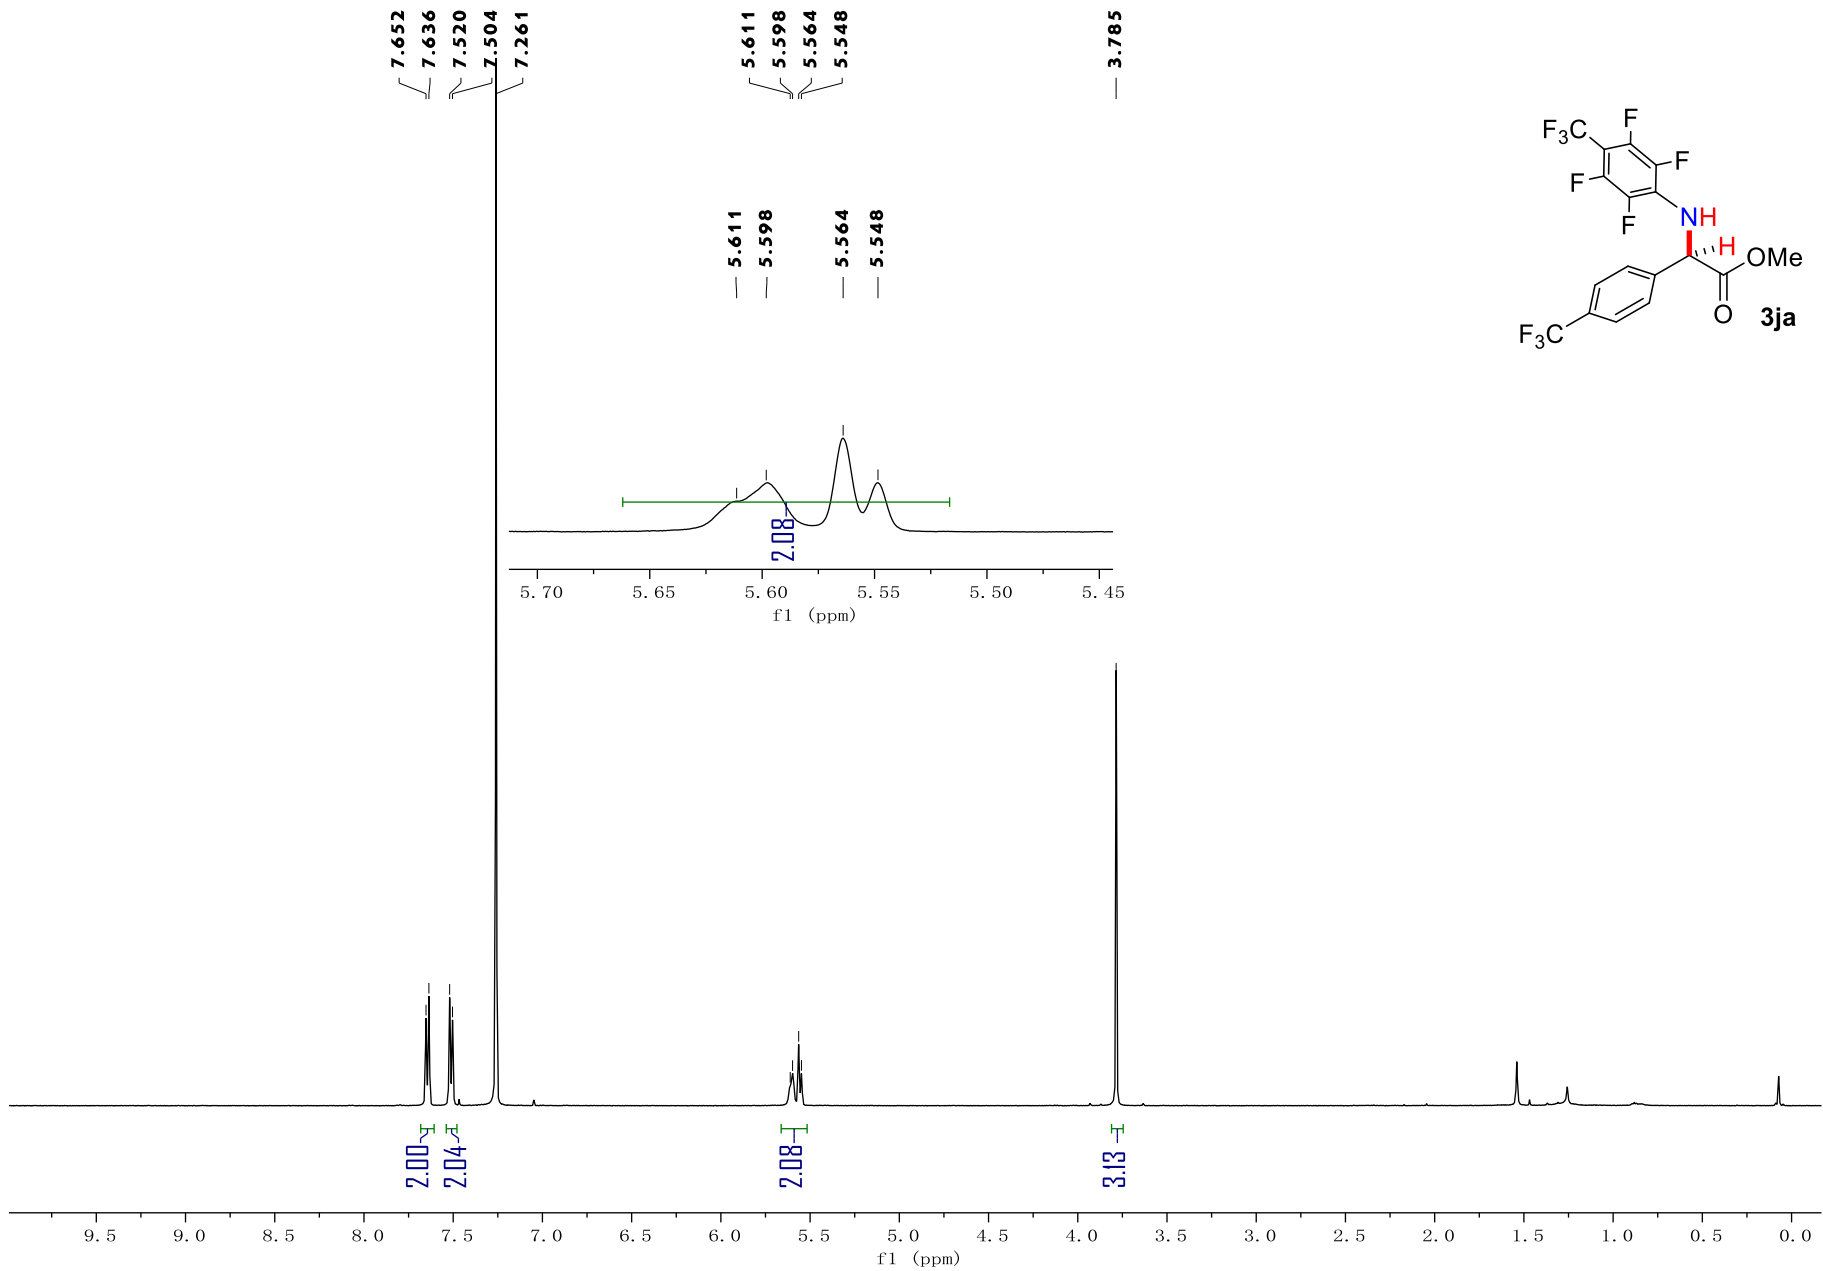

# $^{13}\text{C}$ NMR

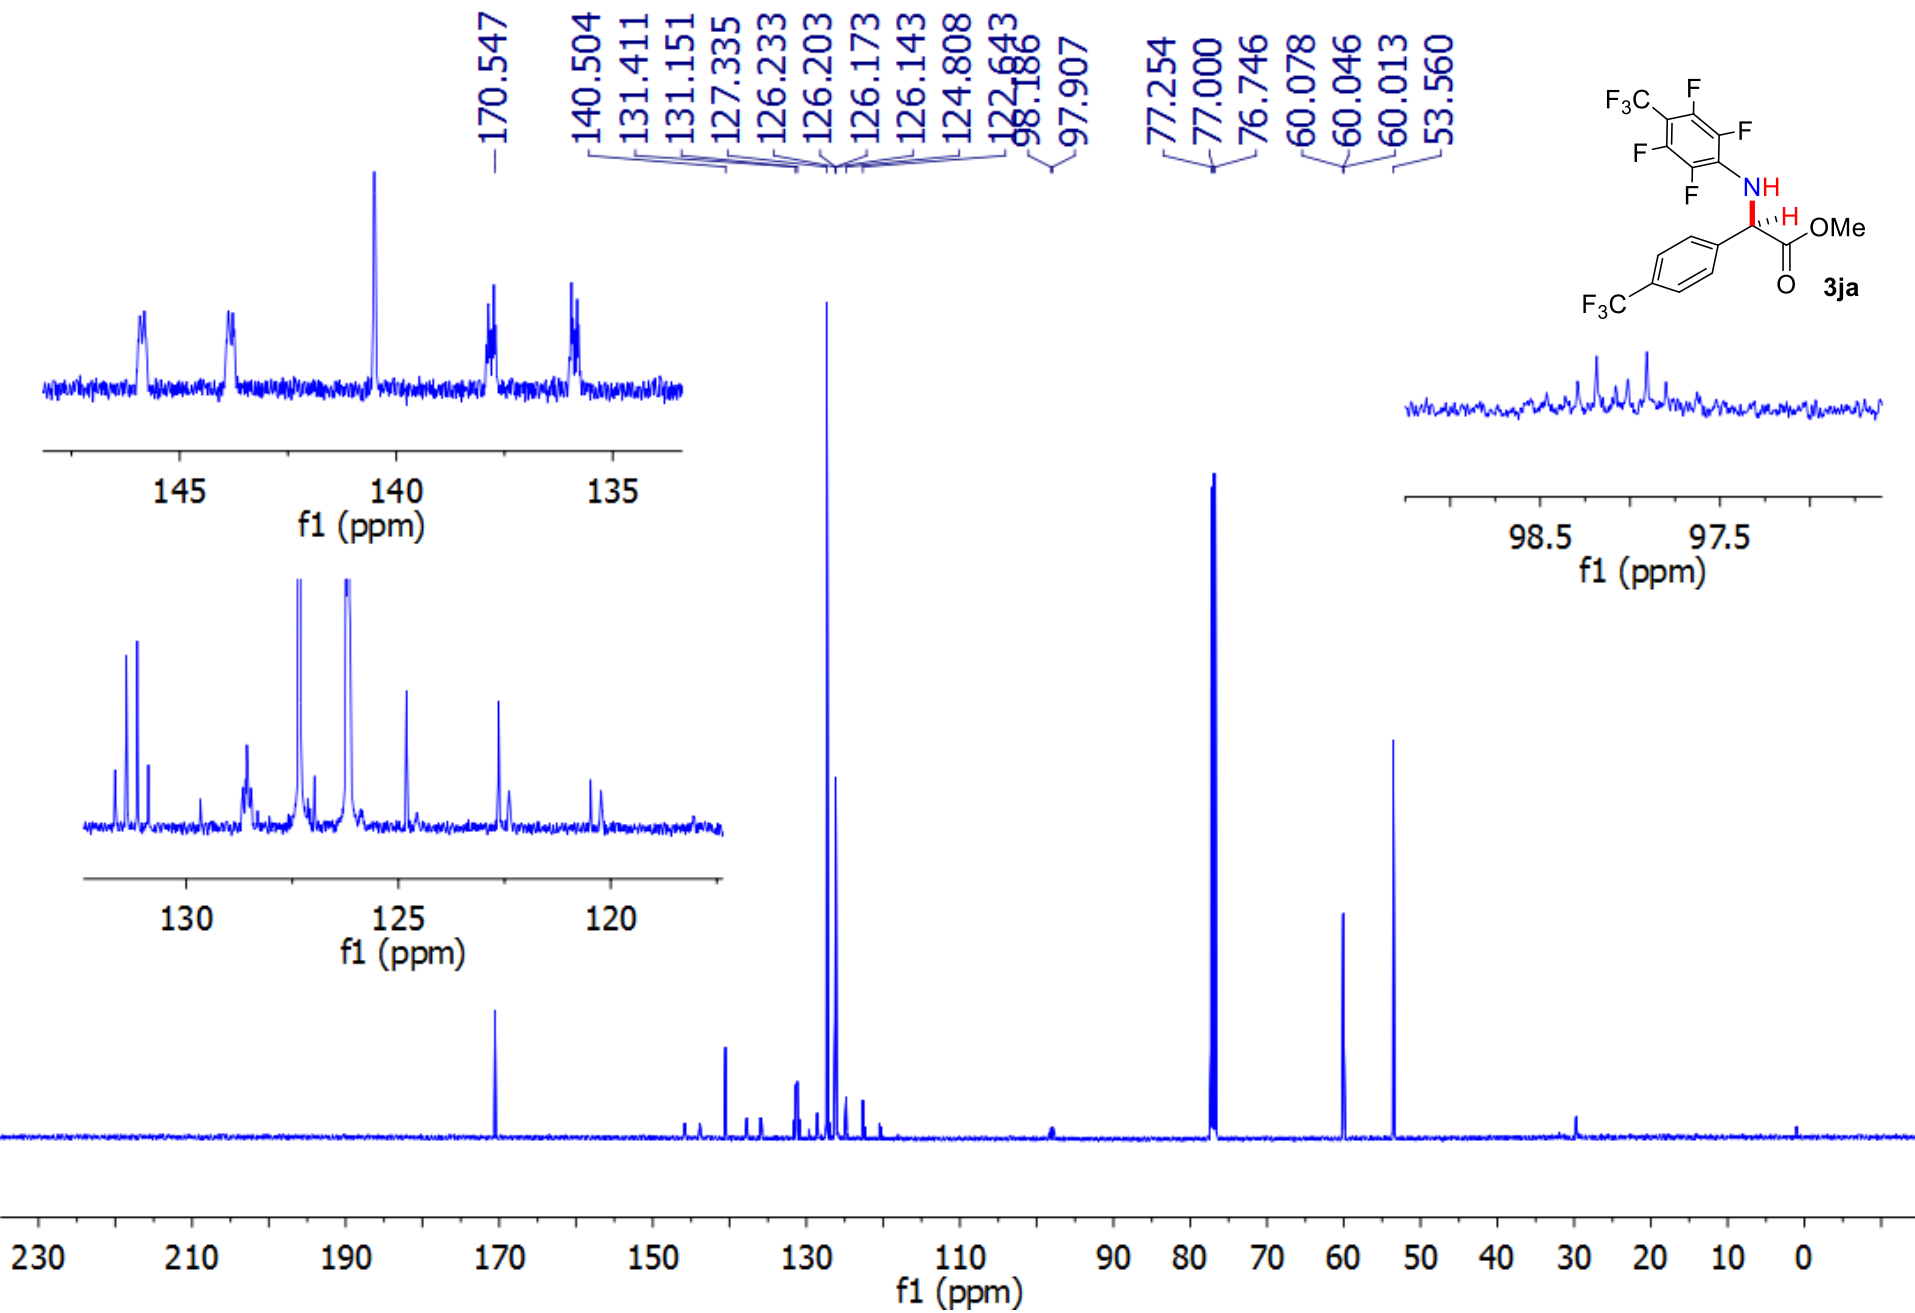

# $^{19}\text{F}$ NMR

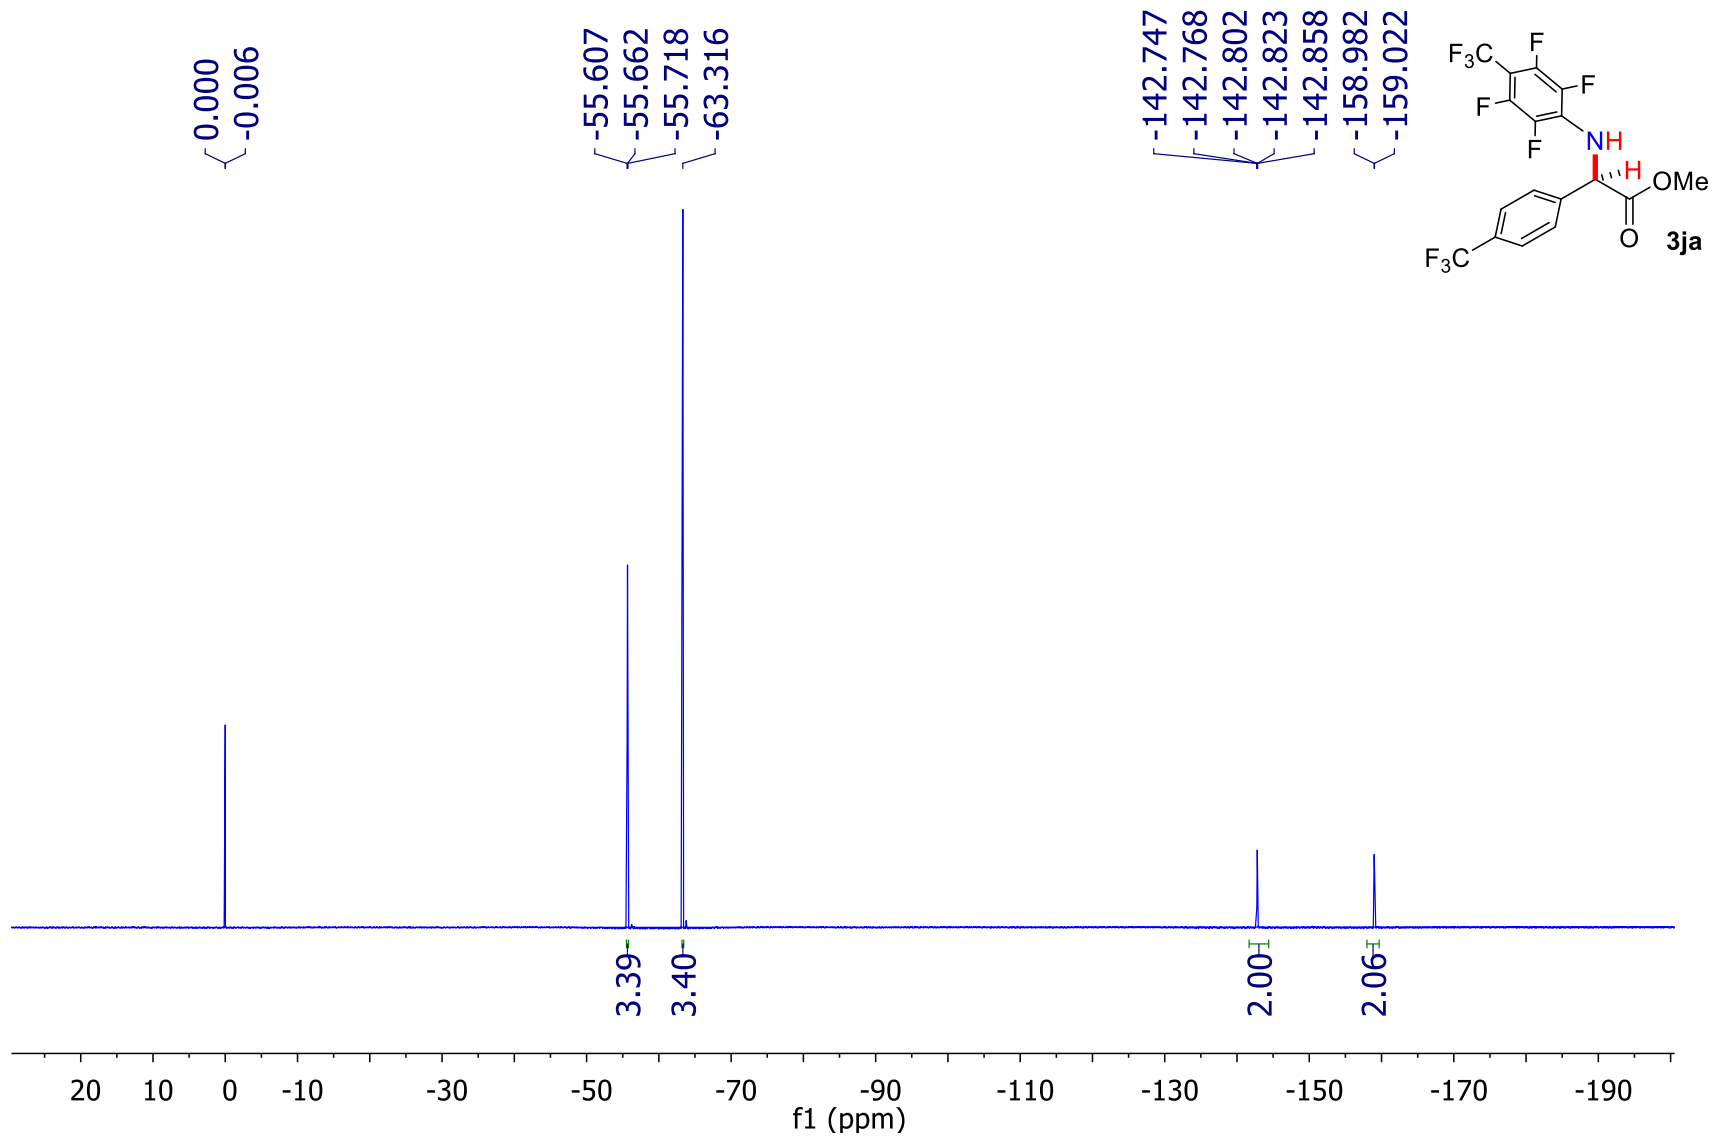

# HPLC

JLM-V-195-1-ADH-1%1ML

C:\EZStart\Projects\Default\Method\JTL-3%-ADH1ml.met

C:\EZStart\Projects\Default\Data\JLM-V-195-1-ADH1%1ML

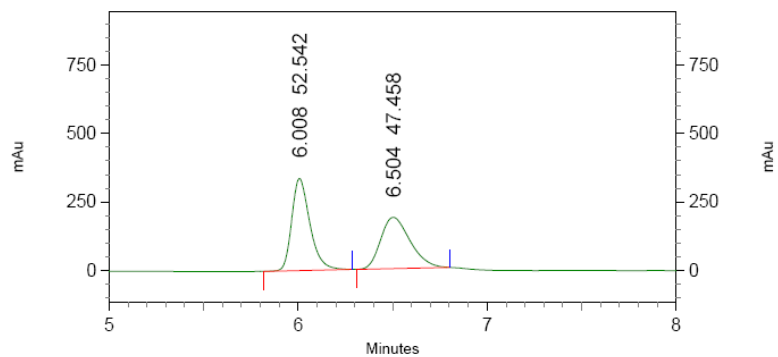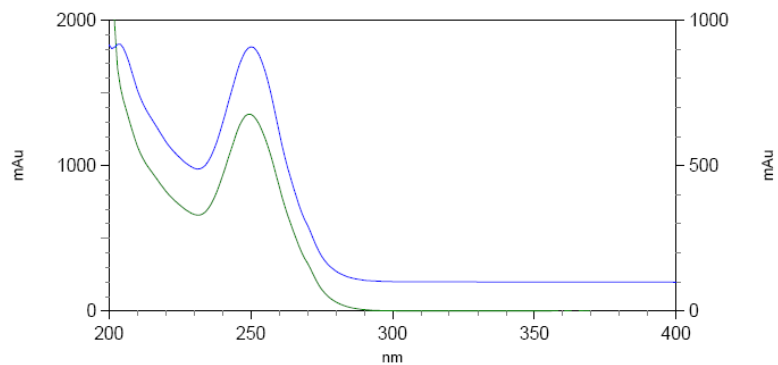

3: 220 nm, 4 nm

Results

| Name | Retention Time | Area Percent | Pk # |
|------|----------------|--------------|------|
|      | 6.008          | 52.542       | 1    |
|      | 6.504          | 47.458       | 2    |

|        |  |         |  |
|--------|--|---------|--|
| Totals |  | 100.000 |  |
|--------|--|---------|--|

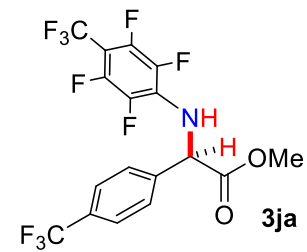



# HPLC

JLM-V-204-1A-ADH-1%1ML

C:\EZStart\Projects\Default\Method\shifatest\_2,5-dimehoxy.met

C:\EZStart\Projects\Default\Data\JLM-V-204-1A-ADH1%1ML

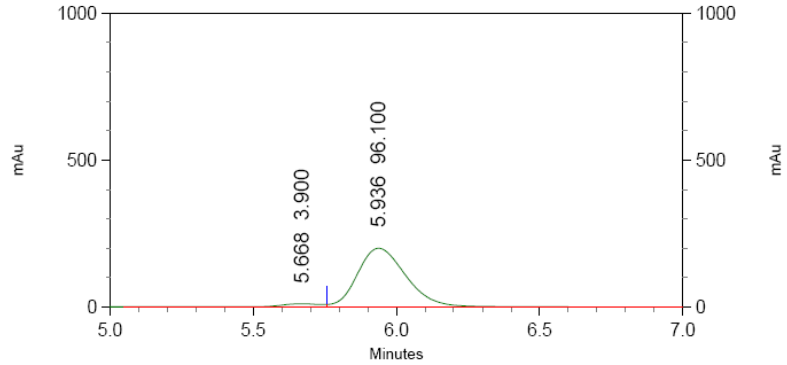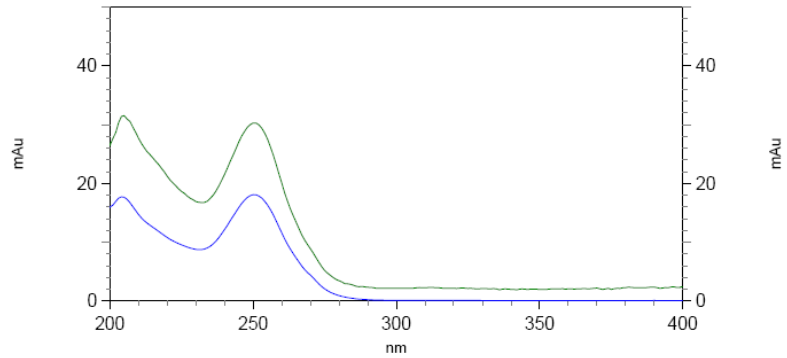

7: 251 nm, 4 nm

Results

| Pk #   | Name | Retention Time | Area Percent |
|--------|------|----------------|--------------|
| 1      |      | 5.668          | 3.900        |
| 2      |      | 5.936          | 96.100       |
| Totals |      |                | 100.000      |

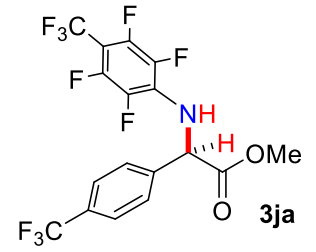

# <sup>1</sup>H NMR

7.360  
7.357  
7.348  
7.342  
7.318  
7.305  
7.301  
7.260

5.526  
5.510  
5.473  
5.457

3.772

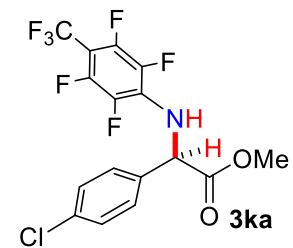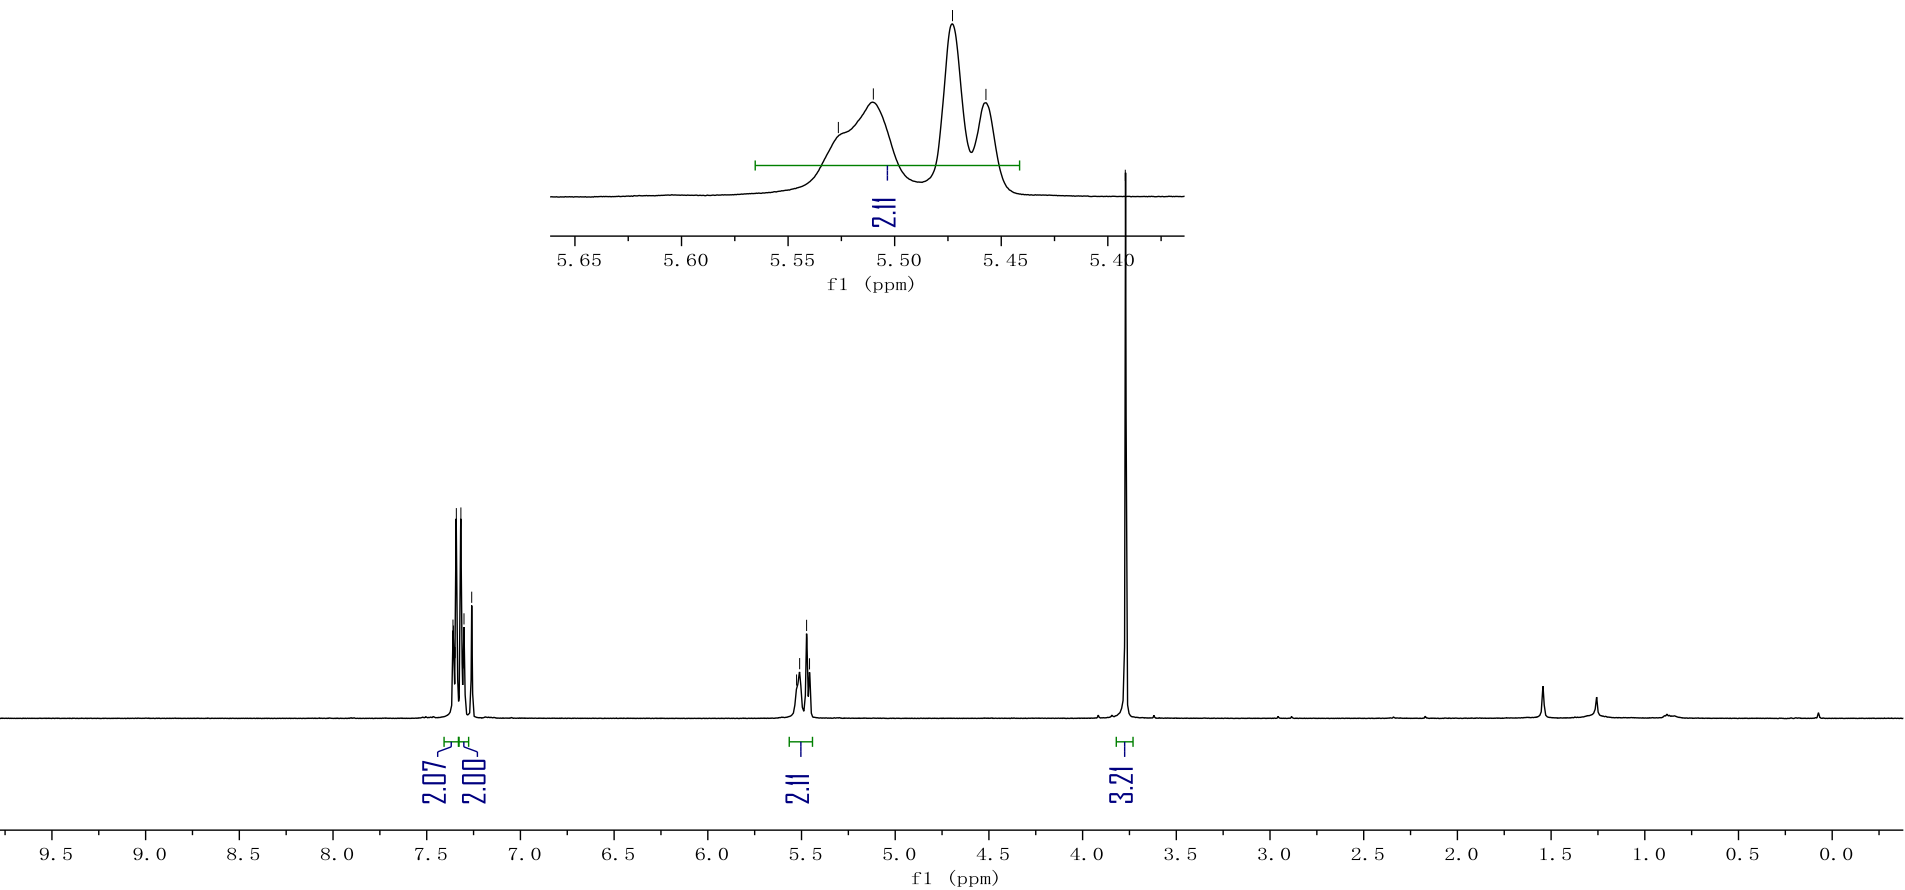

# $^{13}\text{C}$ NMR

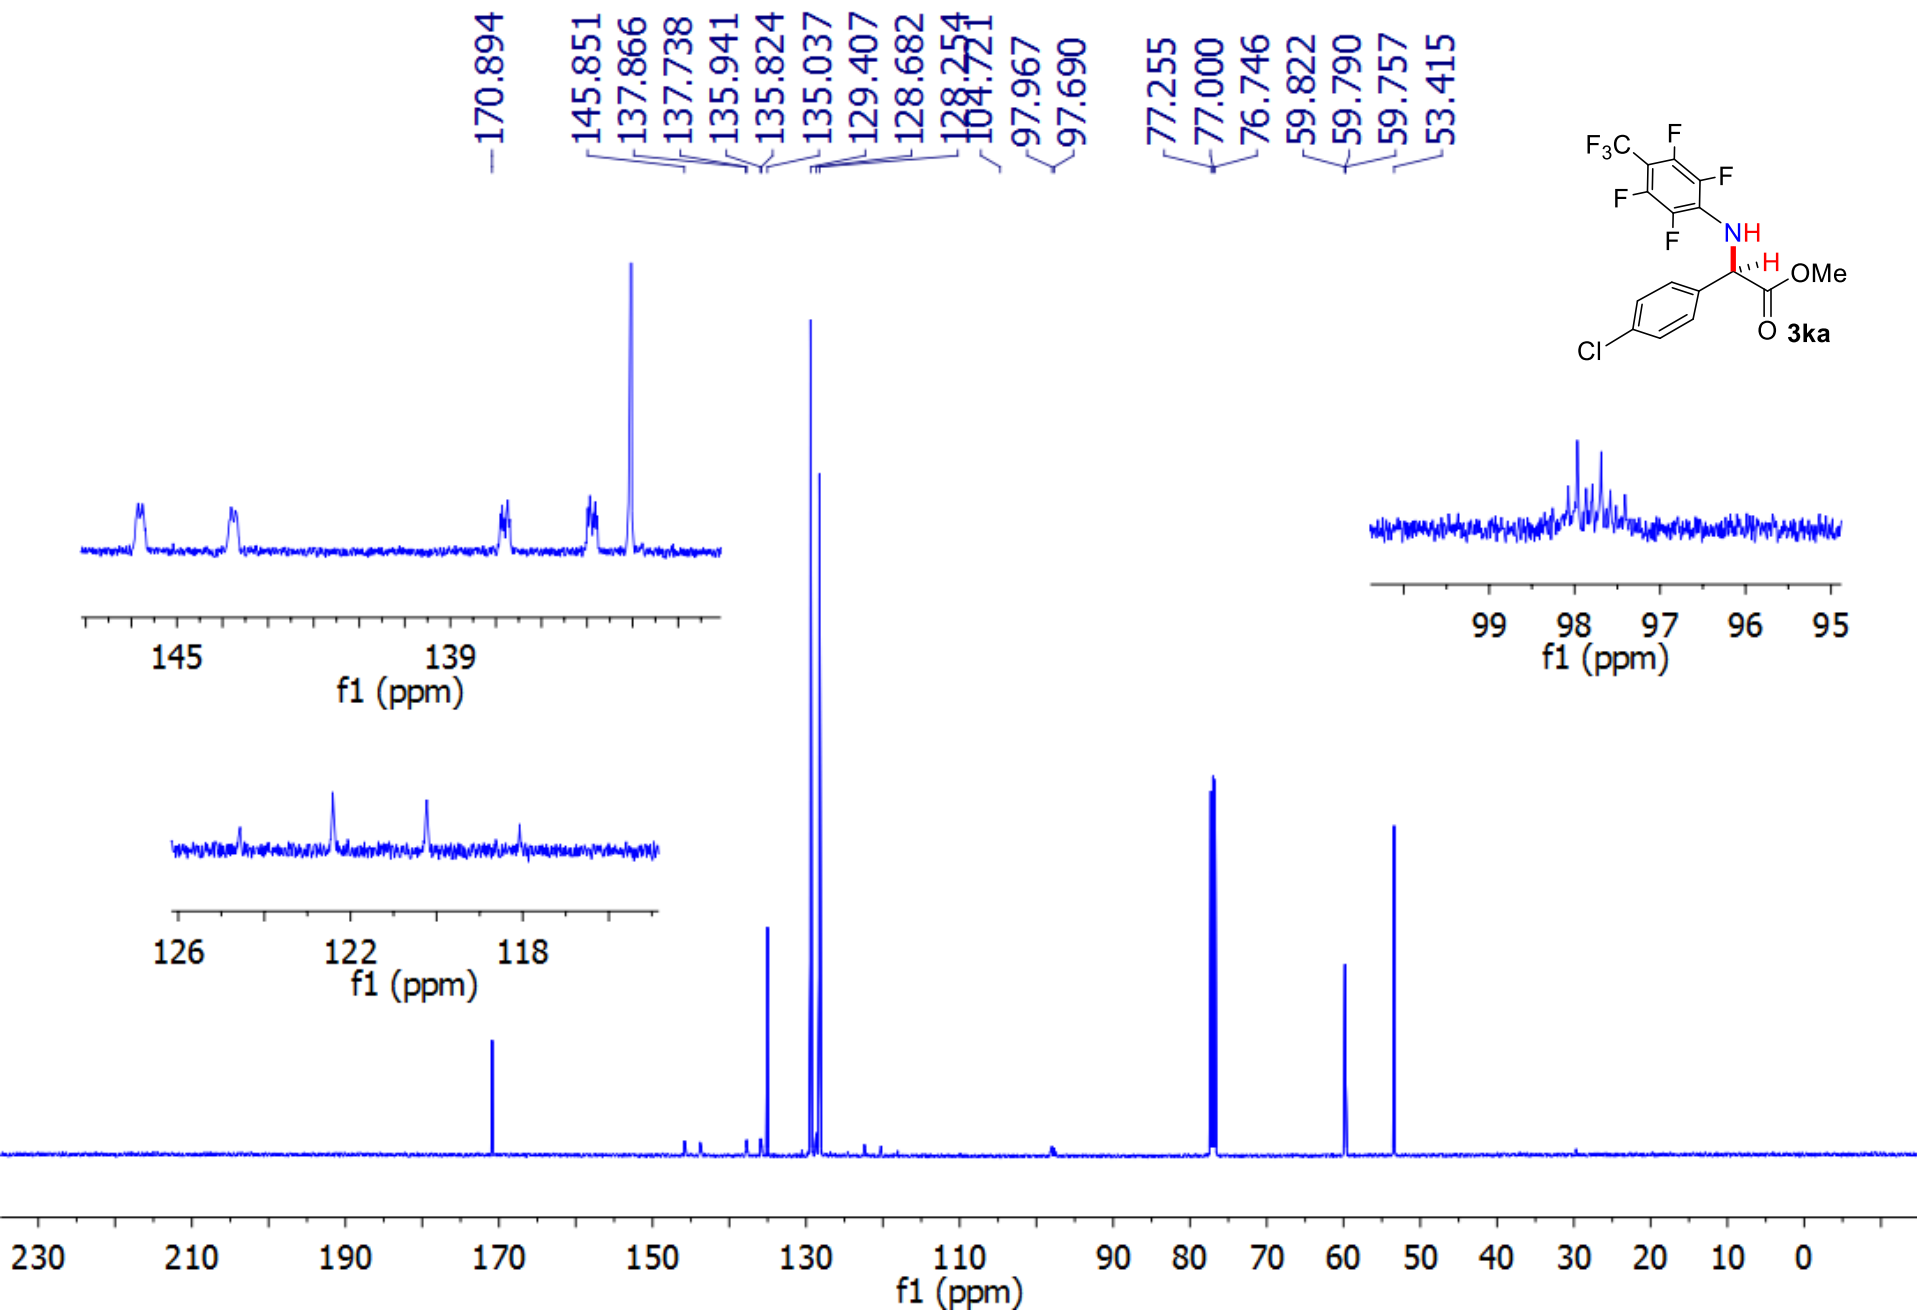

# <sup>19</sup>F NMR

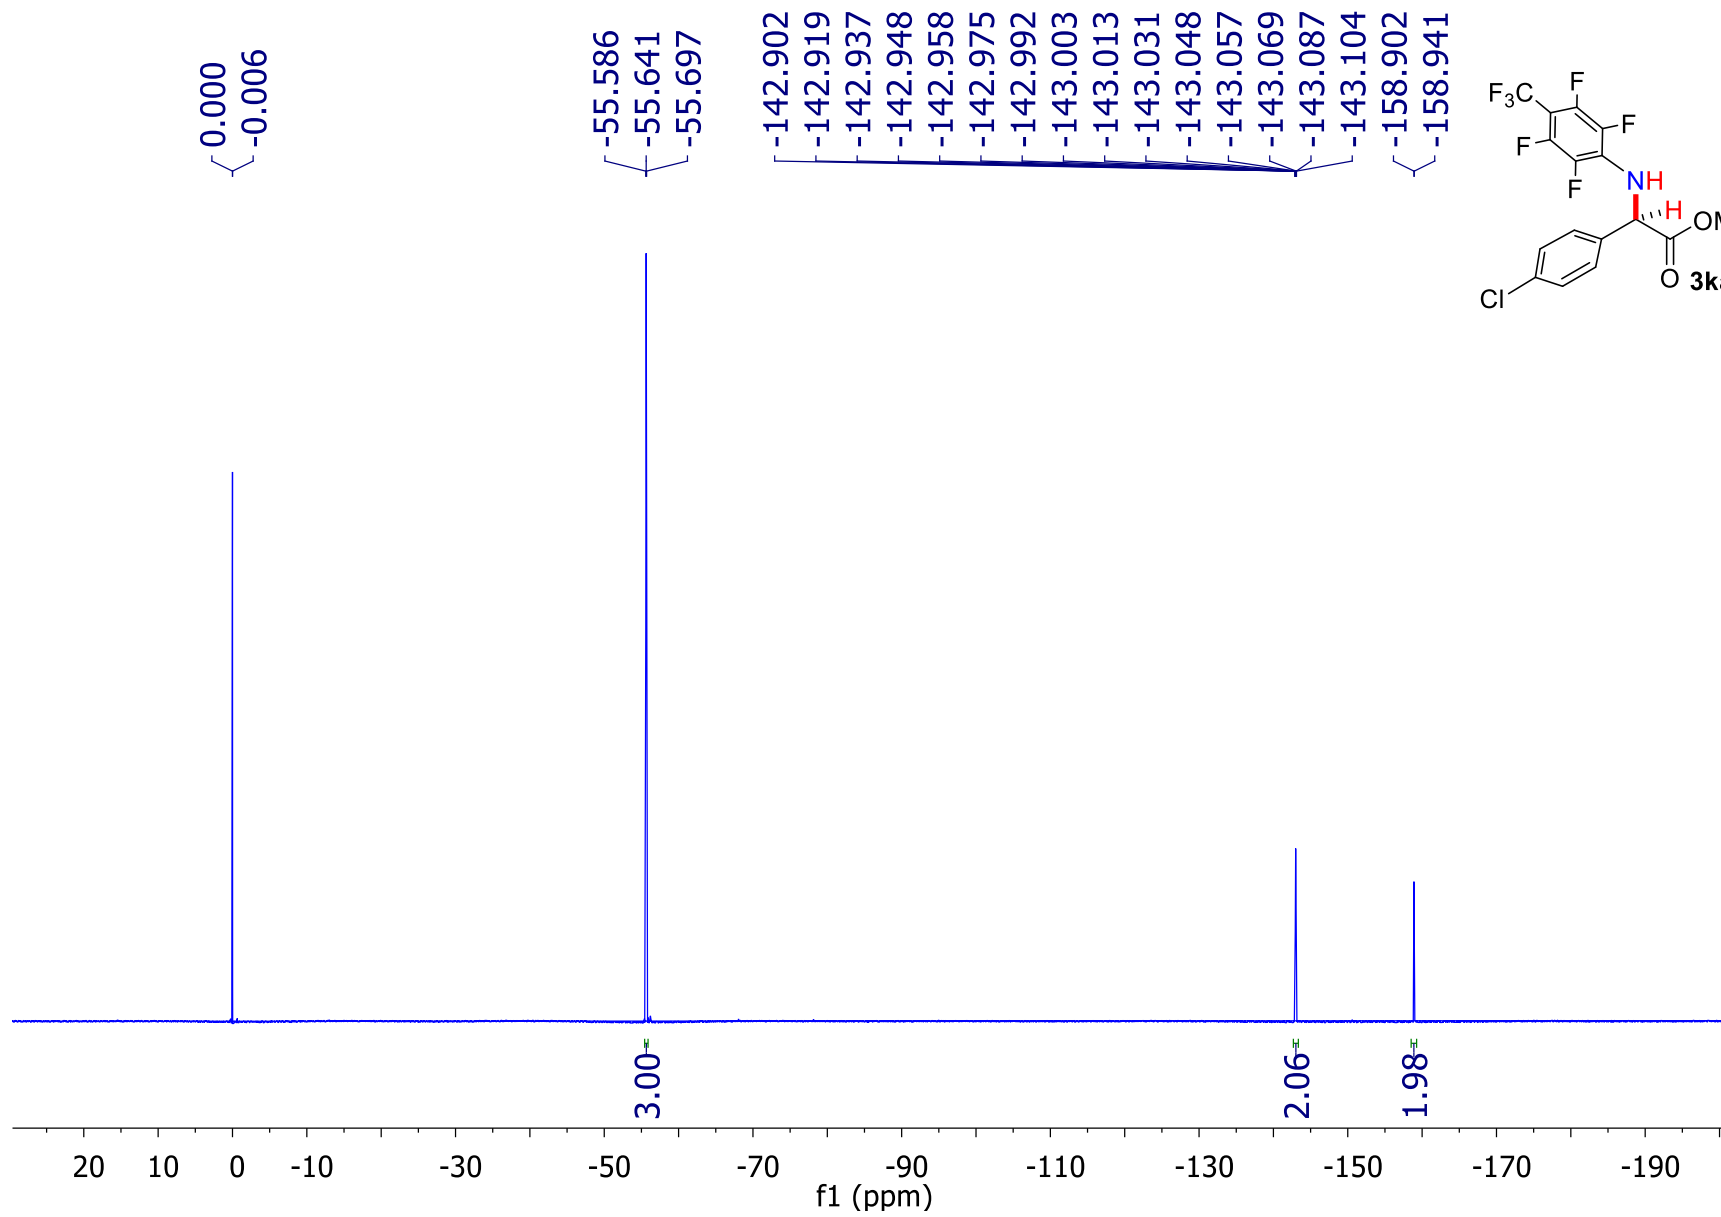

# HPLC

JLM-V-223-1-OJH-1%1ML  
 C:\EZStart\Projects\Default\Data\JLM-V-223-1-OJH-1%1ML  
 C:\EZStart\Projects\Default\Method\CQL-AD-H10%1.0ml60min.met  
 AD-H column 20%IPA @ 0.8ml/min

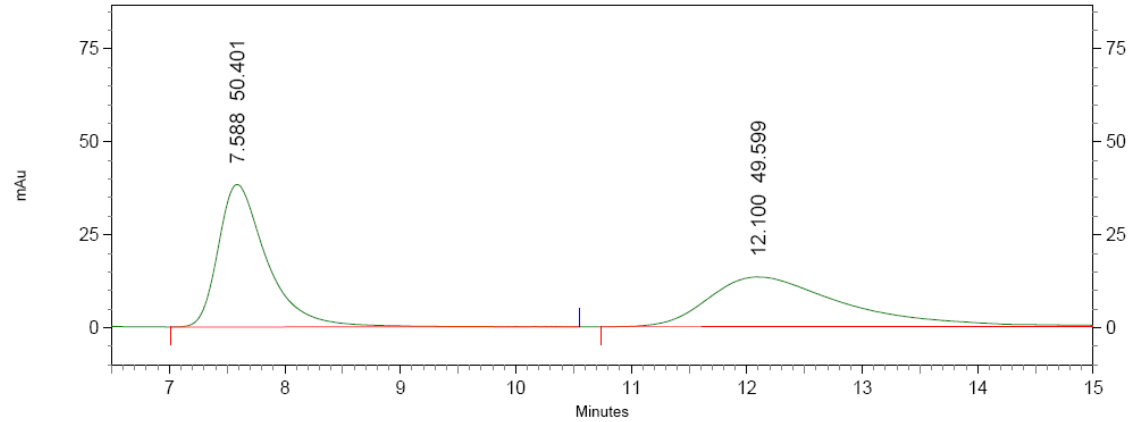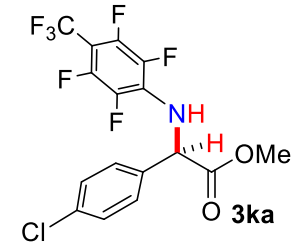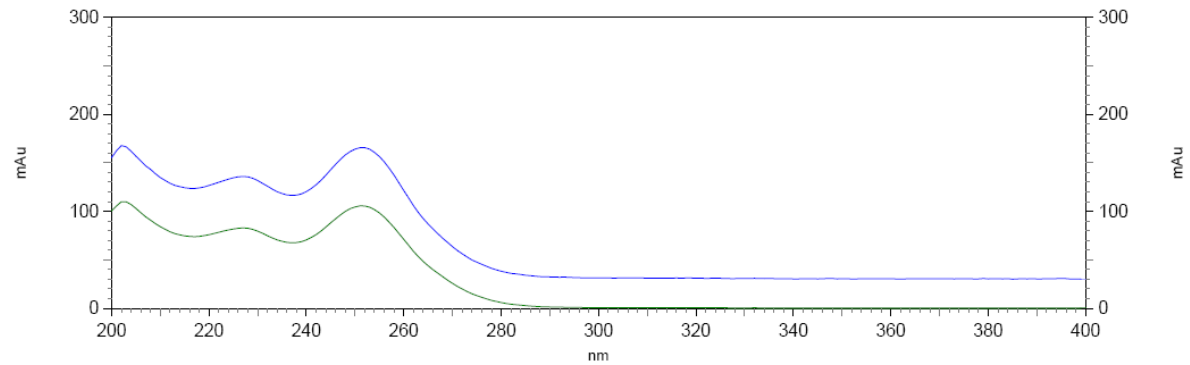

4: 259 nm, 4 nm Results

| Pk # | Retention Time | Area Percent |
|------|----------------|--------------|
| 1    | 7.588          | 50.401       |
| 2    | 12.100         | 49.599       |

|        |  |         |
|--------|--|---------|
| Totals |  | 100.000 |
|--------|--|---------|

# HPLC

JLM-V-223-2-OJH-1%1ML  
C:\EZStart\Projects\Default\Data\JLM-V-223-2-OJH-1%1ML  
C:\EZStart\Projects\Default\Method\CQL-AD-H10%1.0ml60min.met  
AD-H column 20%IPA @ 0.8ml/min

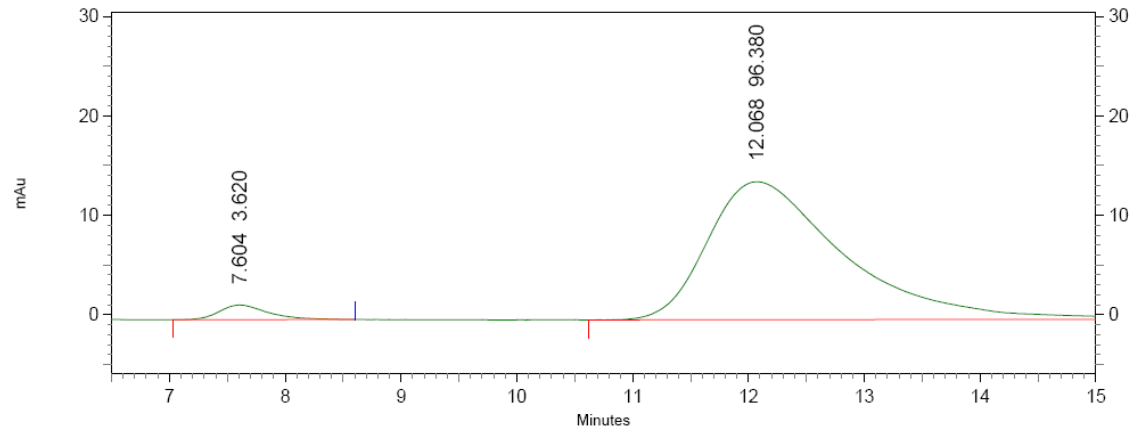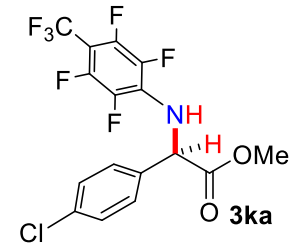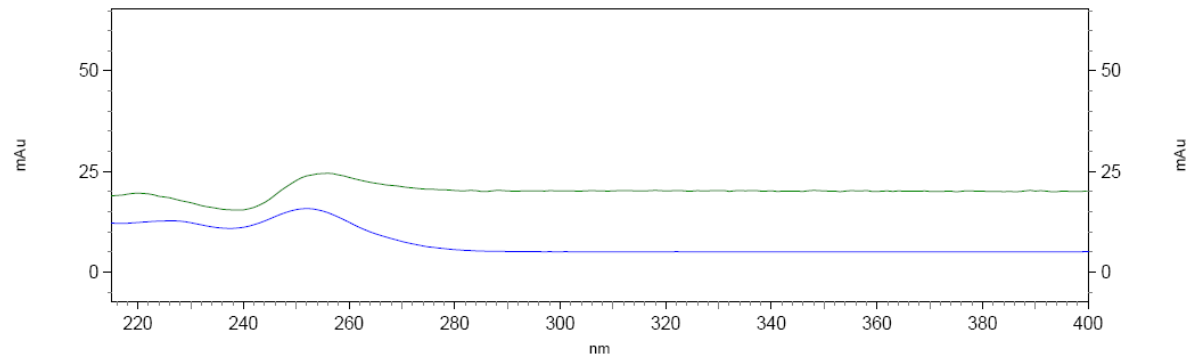

4: 259 nm, 4 nm Results

| Pk # | Retention Time | Area Percent |
|------|----------------|--------------|
| 1    | 7.604          | 3.620        |
| 2    | 12.068         | 96.380       |

|        |         |
|--------|---------|
| Totals | 100.000 |
|--------|---------|

# <sup>1</sup>H NMR

7.509  
7.492  
7.260  
7.244  
5.533  
5.431  
5.415  
4.289  
4.275  
4.268  
4.253  
4.183  
4.169  
4.162  
4.147  
1.236  
1.222  
1.208

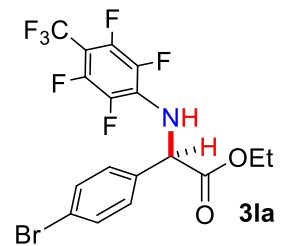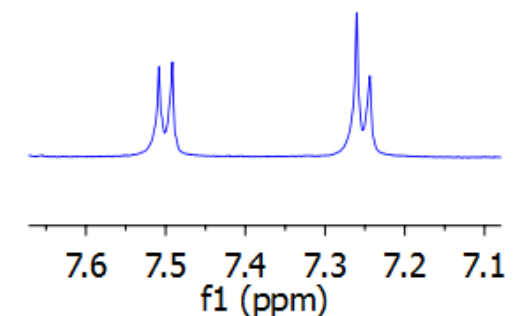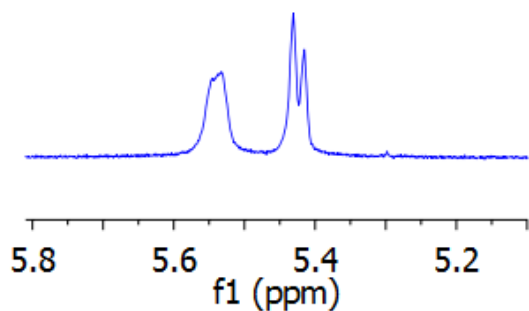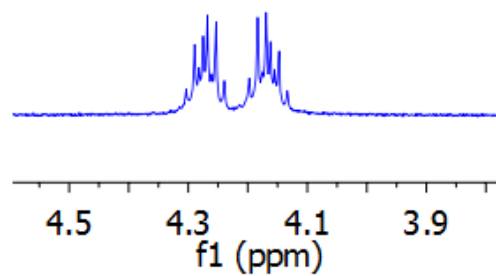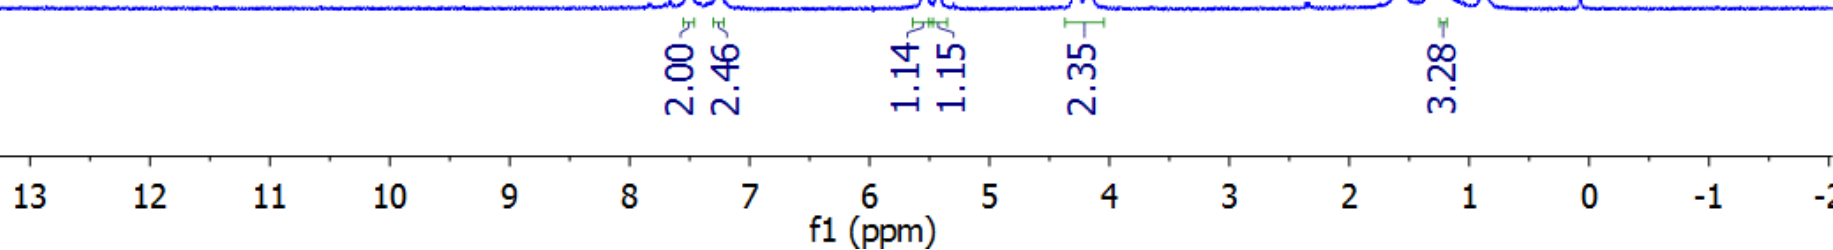

# $^{13}\text{C}$ NMR

170.299  
145.775  
145.614  
143.824  
139.602  
137.764  
135.780  
132.313  
128.514  
123.109  
122.456  
120.251  
97.673  
77.254  
77.000  
76.746  
62.719  
60.011  
59.979  
59.947  
13.924

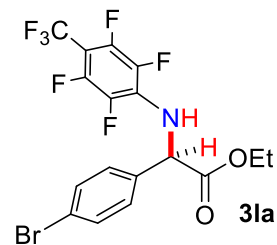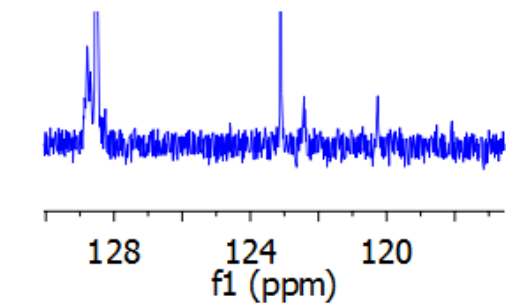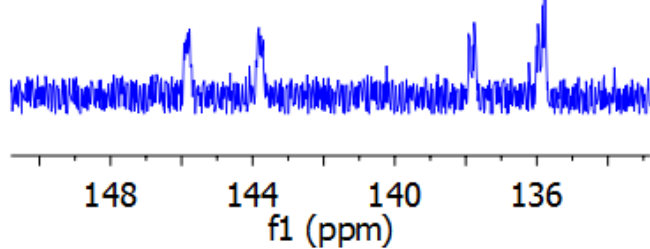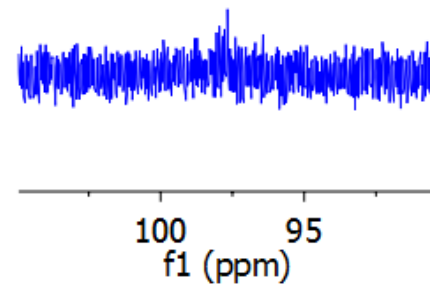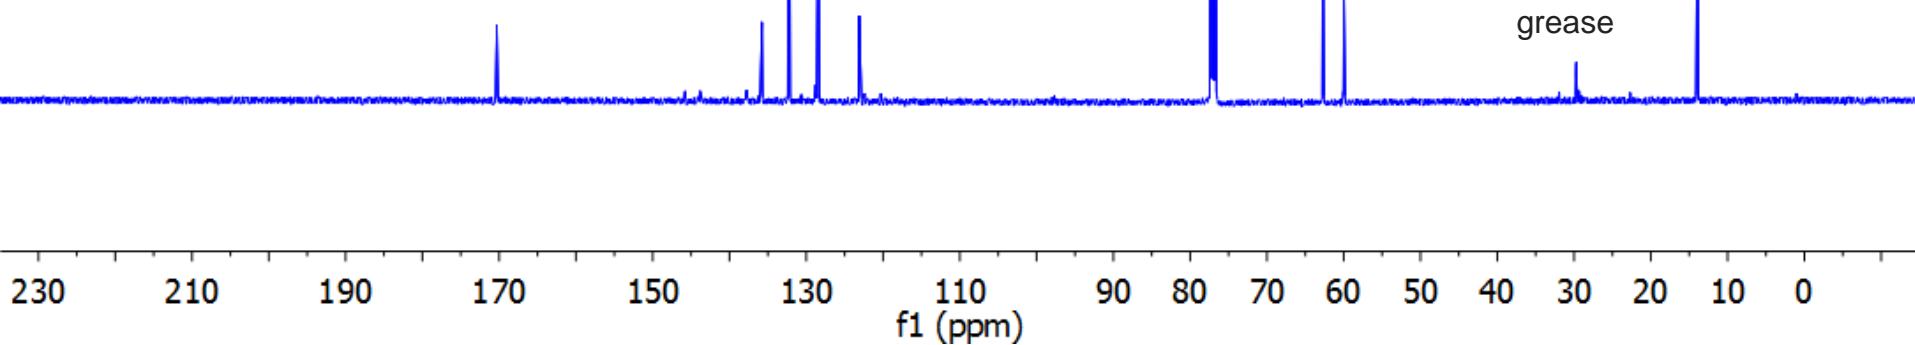



# $^{19}\text{F}$ NMR

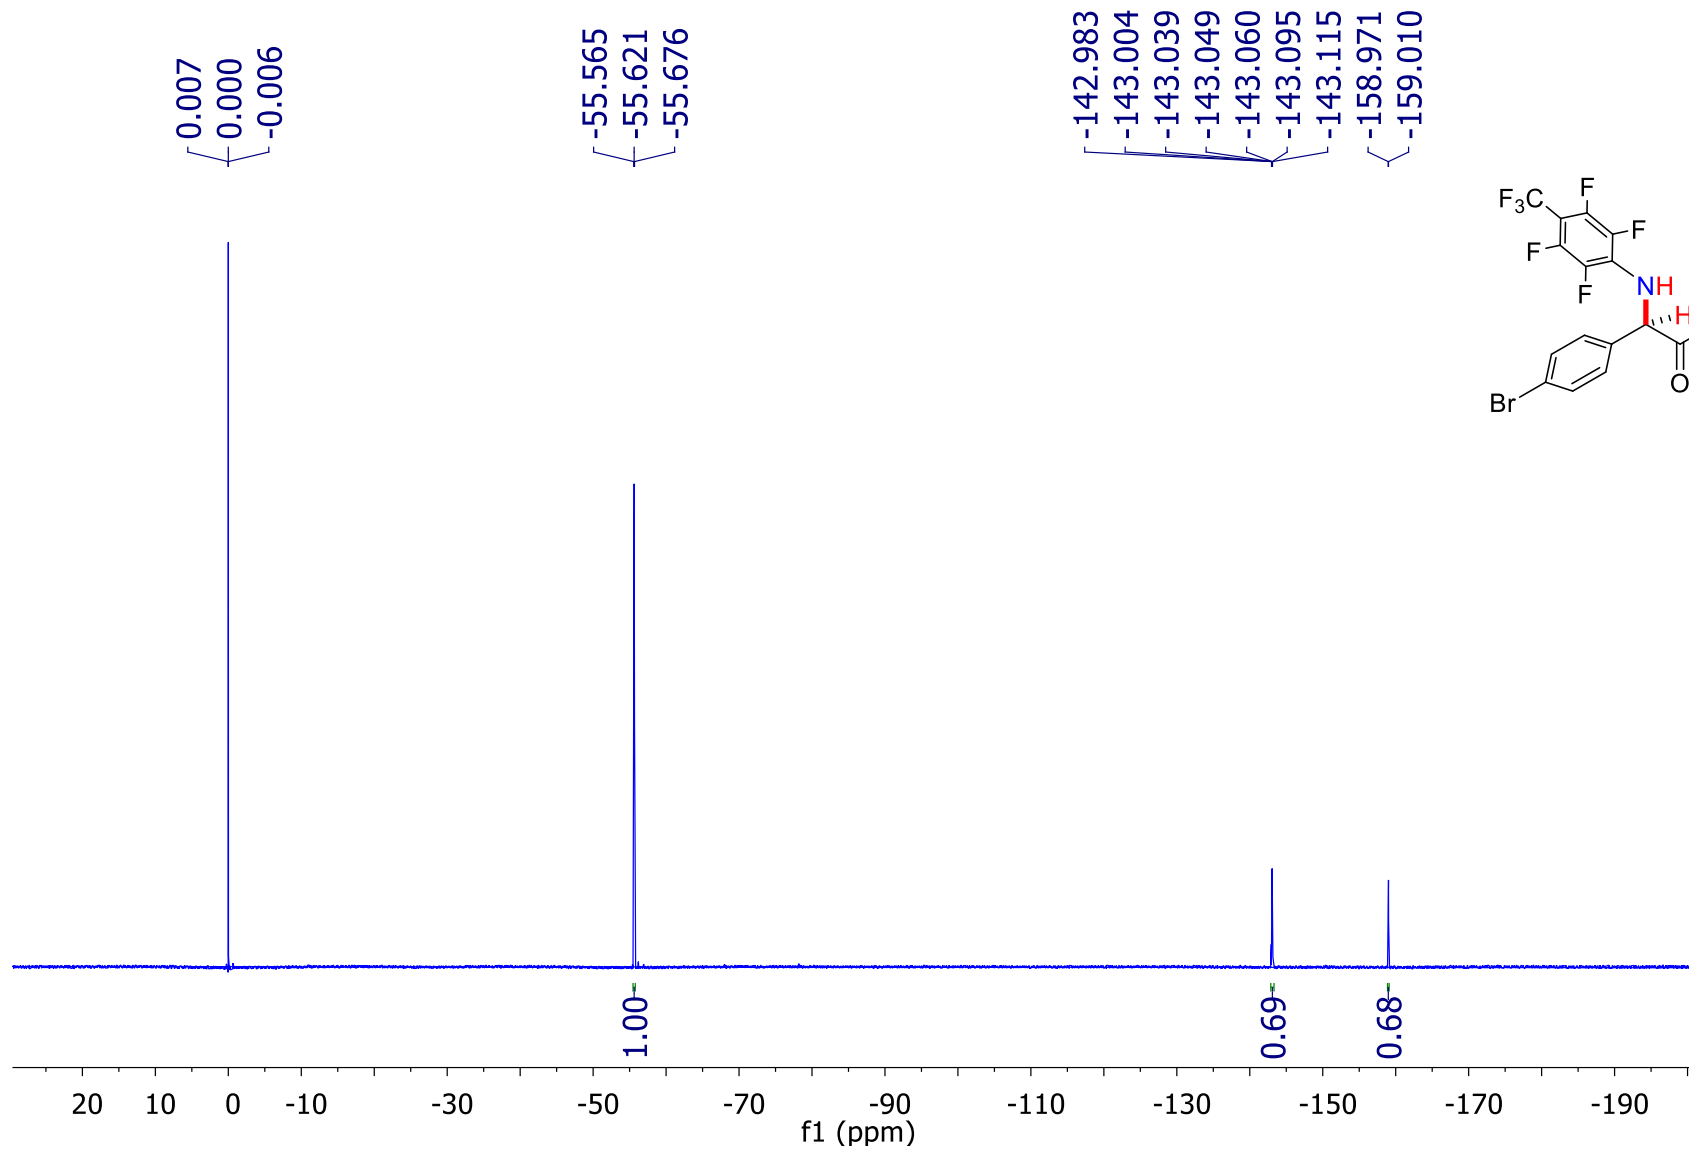

# HPLC

JLM-III-1-1-Whelk-0.5@-1mL  
C:\EZStart\Projects\Default\Method\XC-5%-ADH1ml.met  
E:\JLM-III-1-1-Whelk-0.5 @1ml

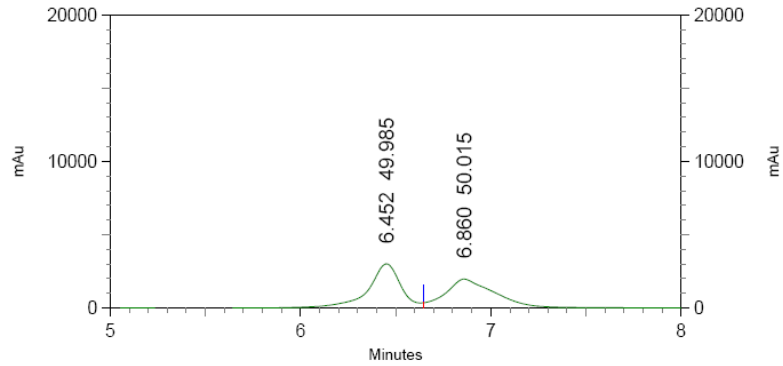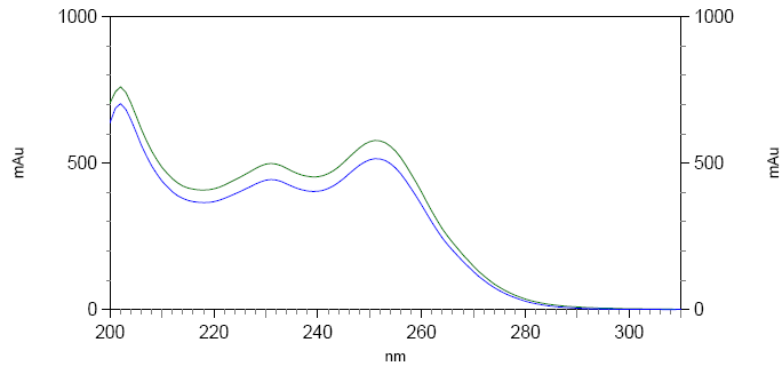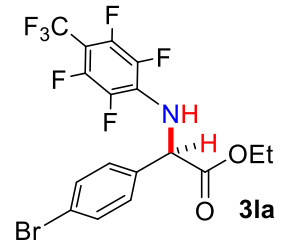

4: 254 nm, 4 nm

Results

| Name | Retention Time | Area Percent | Pk # |
|------|----------------|--------------|------|
|      | 6.452          | 49.985       | 1    |
|      | 6.860          | 50.015       | 2    |

|        |  |         |  |
|--------|--|---------|--|
| Totals |  | 100.000 |  |
|--------|--|---------|--|

# HPLC

JLM-V-137-1-WHELK-0.5@-1mL  
C:\EZStart\Projects\Default\Method\XC-5%-ADH1ml.met  
E:\JLM-V-137-1-WHELK0.5@1ml

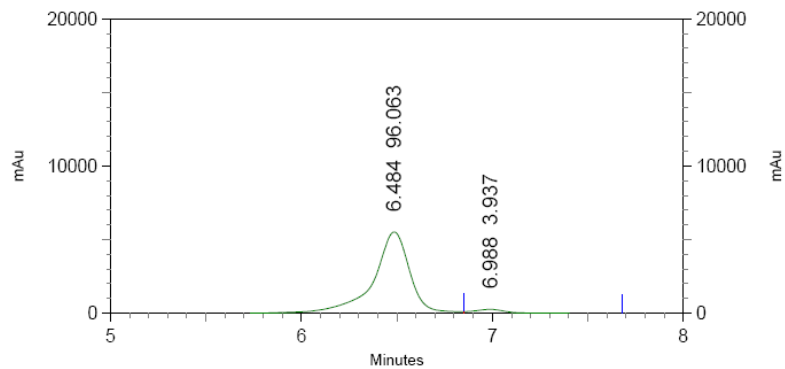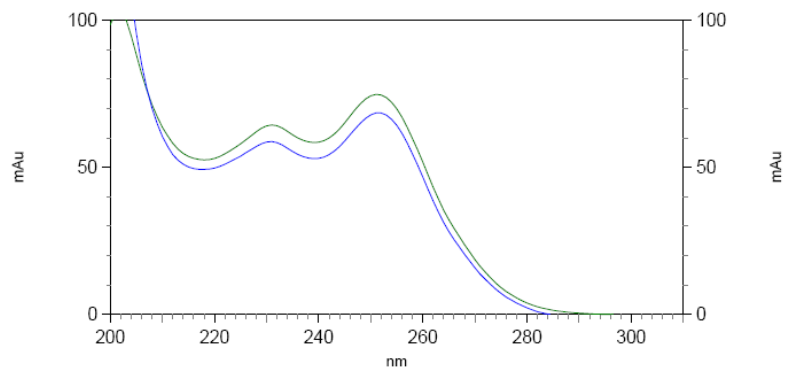

4: 254 nm, 4 nm

Results

| Name | Retention Time | Area Percent | Pk # |
|------|----------------|--------------|------|
|      | 6.484          | 96.063       | 1    |
|      | 6.988          | 3.937        | 2    |

|        |         |  |
|--------|---------|--|
| Totals | 100.000 |  |
|--------|---------|--|

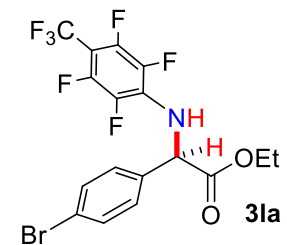

# <sup>1</sup>H NMR

8.214  
8.197  
7.929  
7.913  
7.901  
7.887  
7.882  
7.630  
7.580  
7.566  
7.487  
7.482  
7.473  
7.260  
6.320  
6.304

5.369  
5.355

-3.751

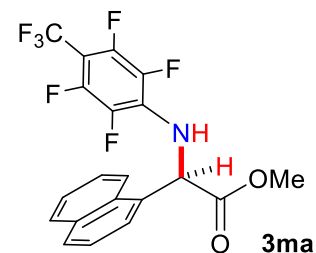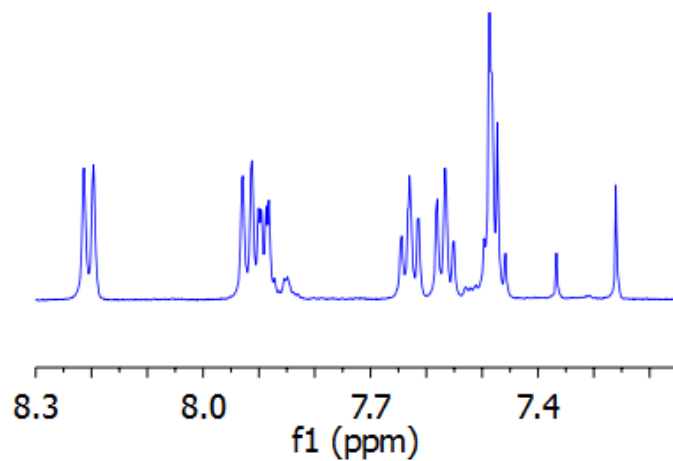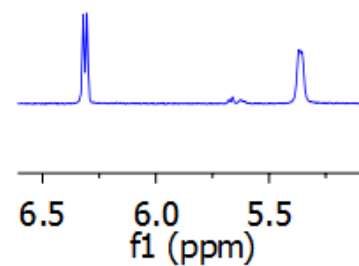

1.05  
2.24  
2.03  
2.17

1.04

1.02

3.33

10.0 9.0 8.0 7.0 6.0 5.0 4.0 3.0 2.0 1.0 0.0 -1.0

f1 (ppm)

<sup>13</sup>C NMR

171.749  
145.919  
136.107  
134.191  
132.201  
130.839  
129.983  
129.119  
127.203  
126.301  
125.333  
125.146  
122.817  
120.317  
97.462  
77.254  
77.000  
76.746  
57.557  
53.187

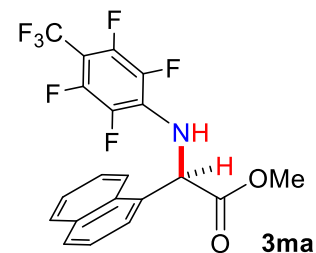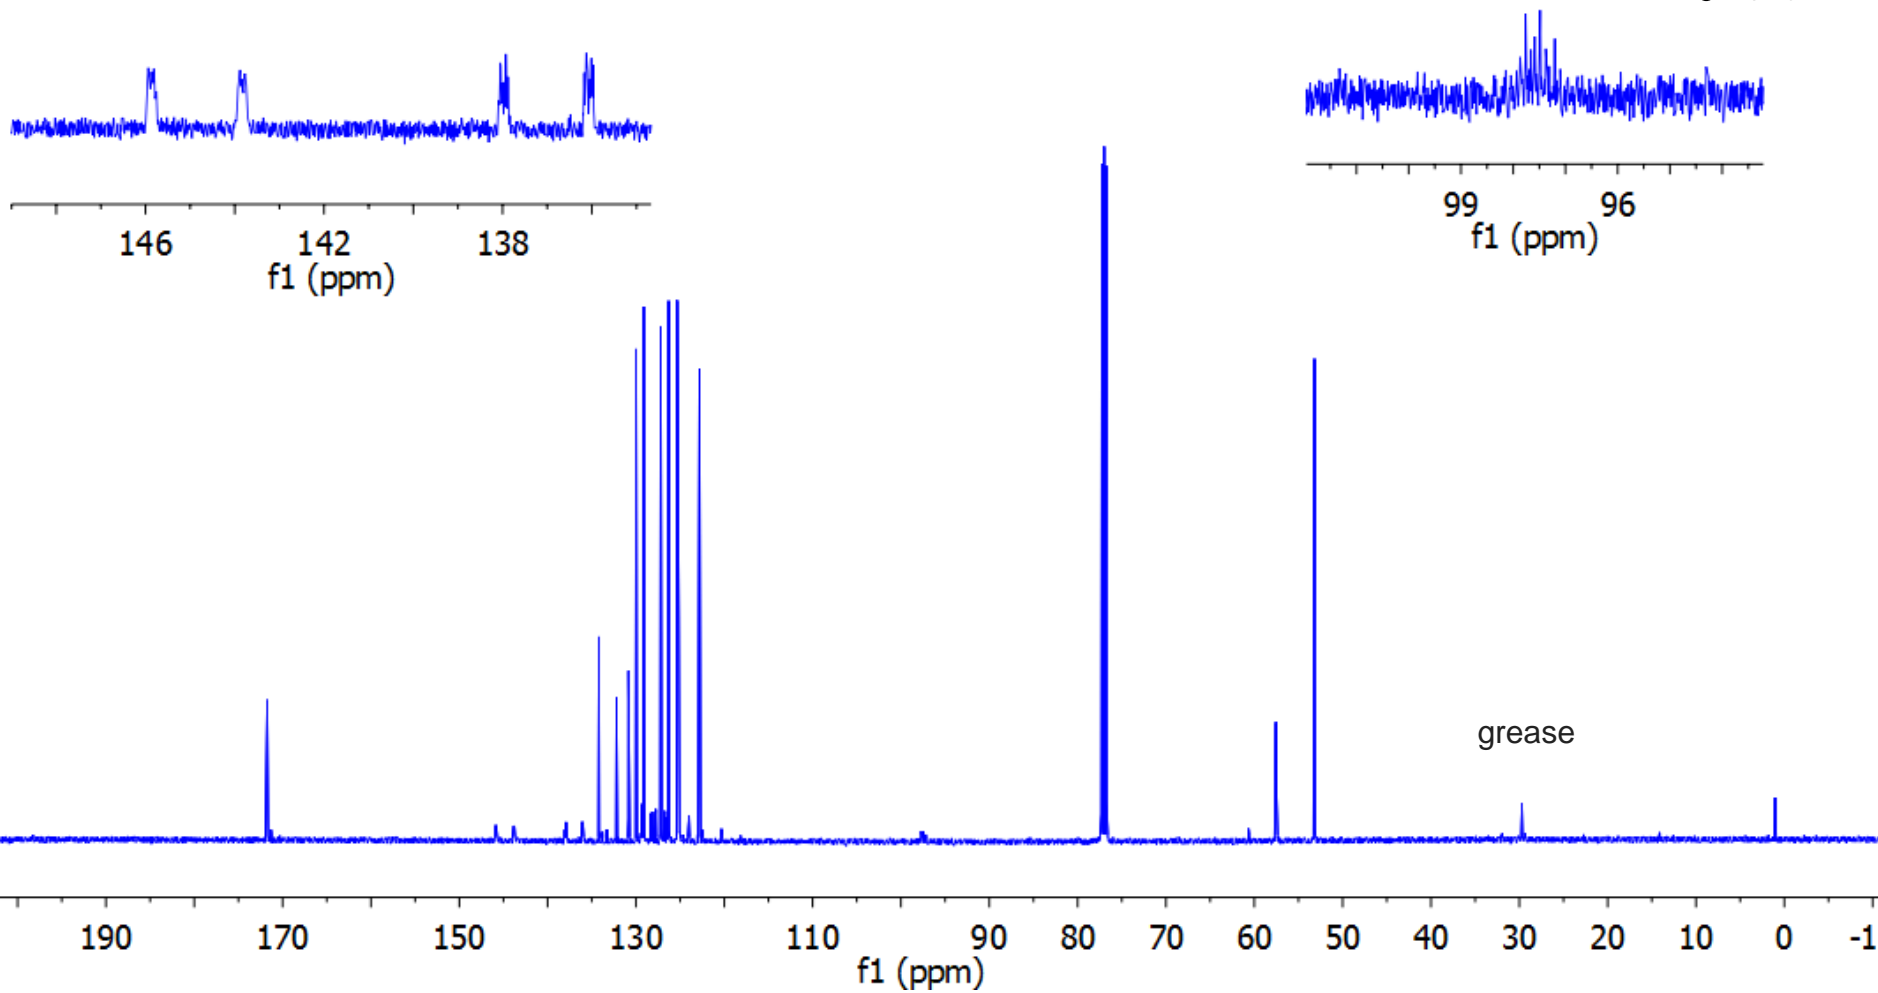

# $^{19}\text{F}$ NMR

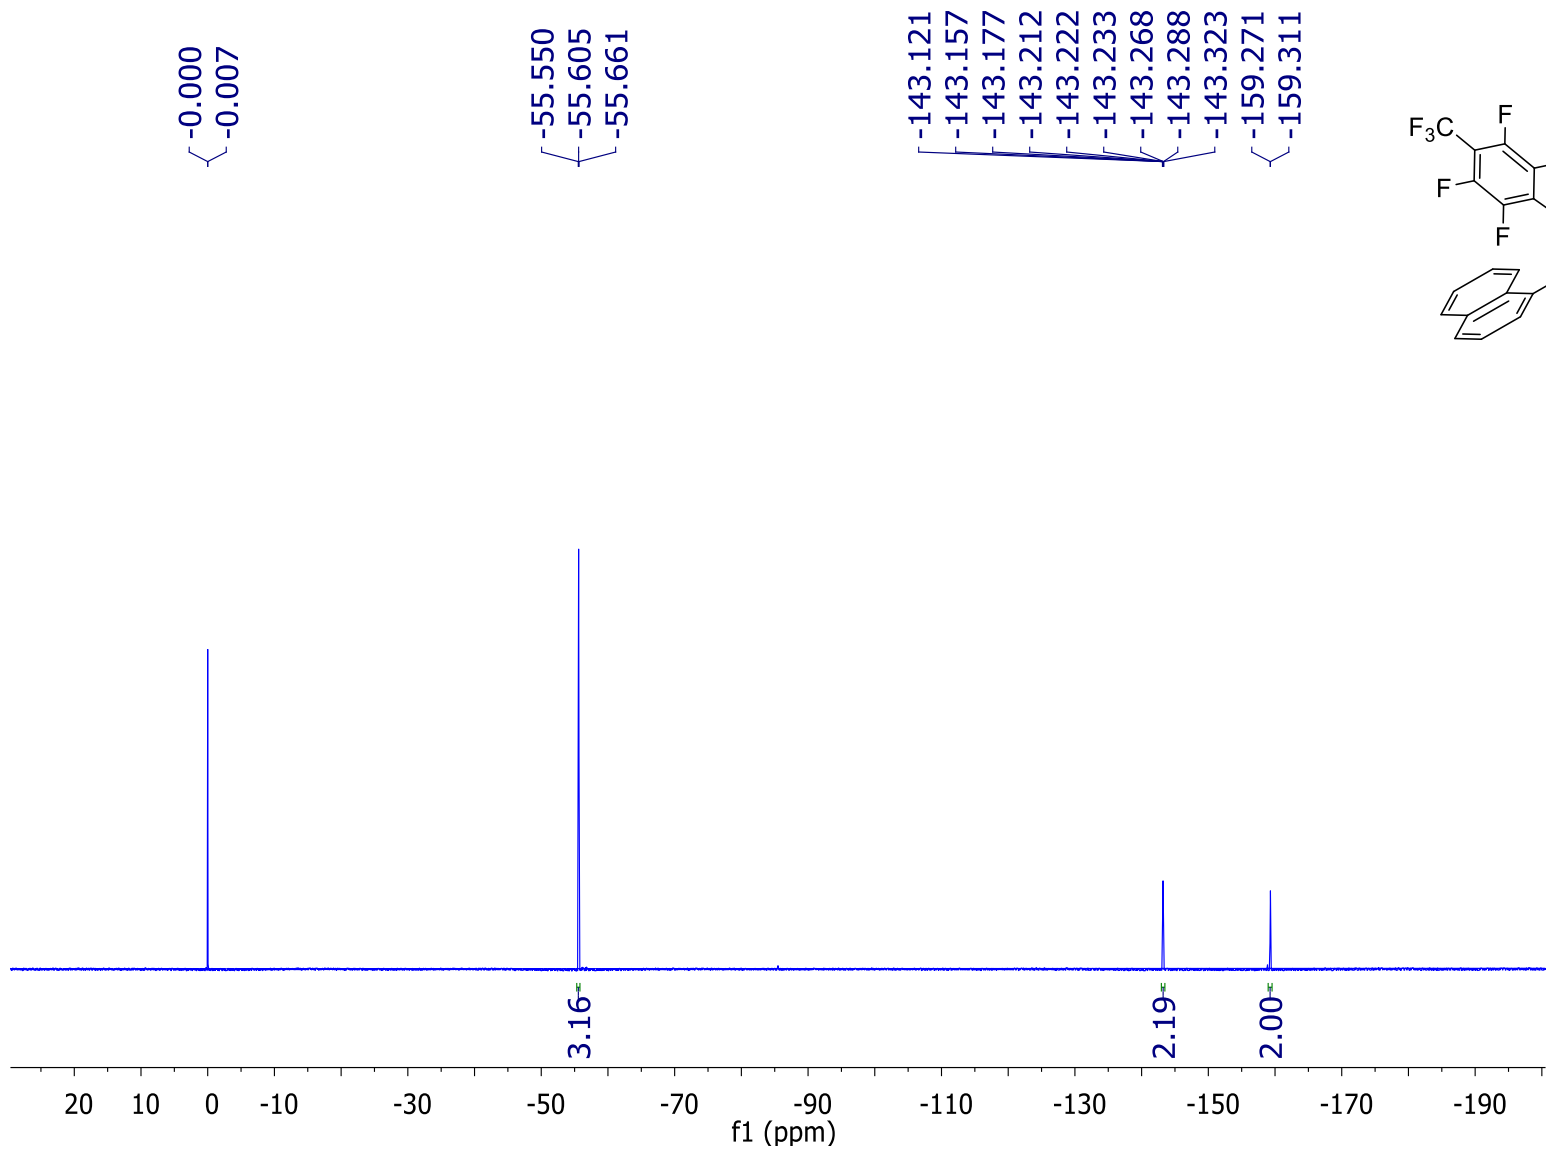

# HPLC

JLM-II-218-1-WHELK-0.5@1ML  
C:\EZStart\Projects\Default\Method\JLM-ODH-0%-0.7ml.met  
C:\Documents and Settings\zhang\Desktop\Jin-Lim\HPLC-data\JLM-II-218-1-WHELK-0.5@1ML.dat

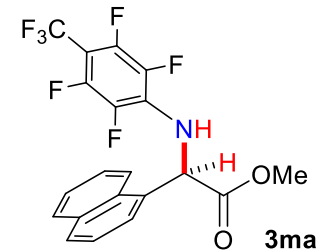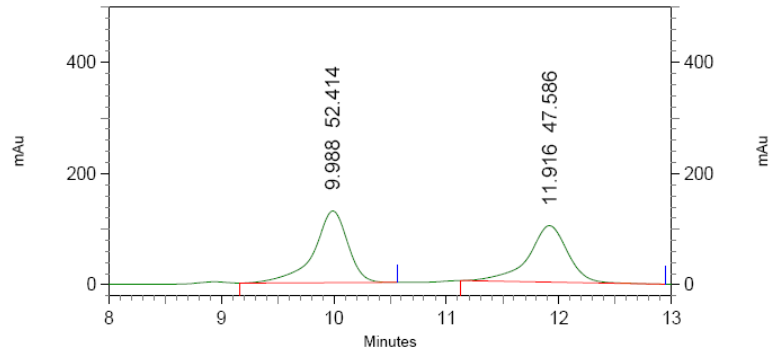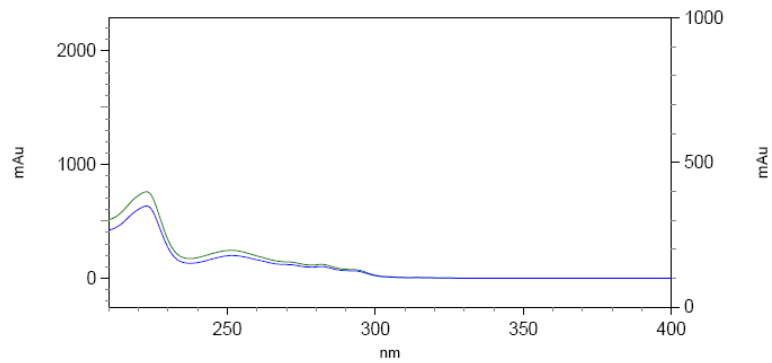

3: 249 nm, 4 nm  
Results

| Pk #   | Name | Retention Time | Area Percent |
|--------|------|----------------|--------------|
| 1      |      | 9.988          | 52.414       |
| 2      |      | 11.916         | 47.586       |
| Totals |      |                | 100.000      |

# HPLC

JLM-V-167-2-WHELK-0.5@-1mL

C:\EZStart\Projects\Default\Method\Joey-ODH-20%-0.8mL.met

C:\EZStart\Projects\Default\Data\JLM-V-167-2-WHELK0.5@1ml

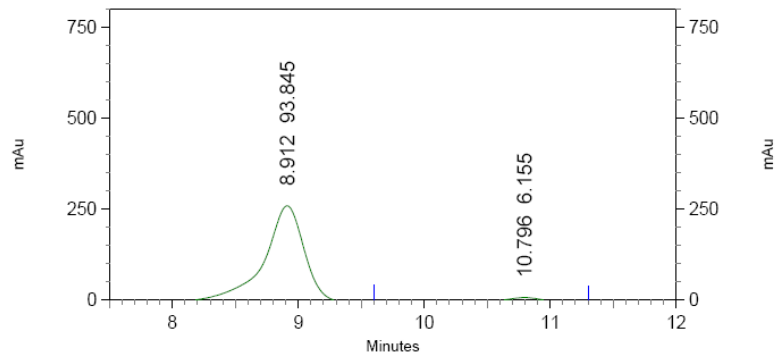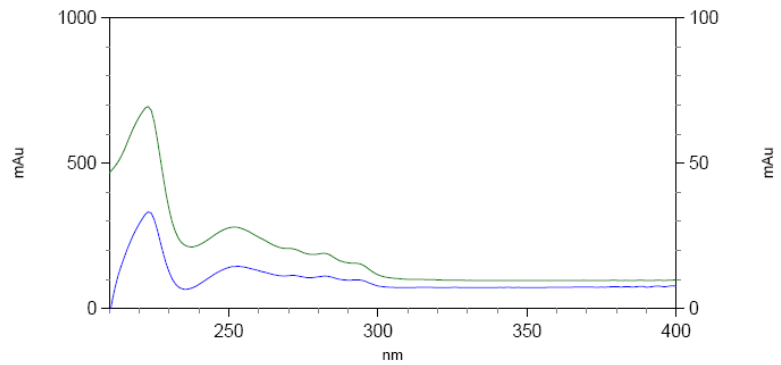

2: 216 nm, 4 nm

Results

| Pk #   | Name | Retention Time | Area Percent |
|--------|------|----------------|--------------|
| 1      |      | 8.912          | 93.845       |
| 2      |      | 10.796         | 6.155        |
| Totals |      |                | 100.000      |

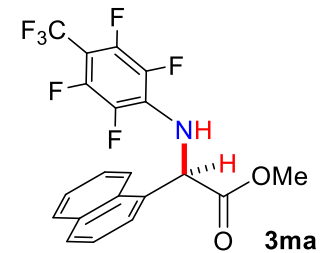



# $^1\text{H}$ NMR

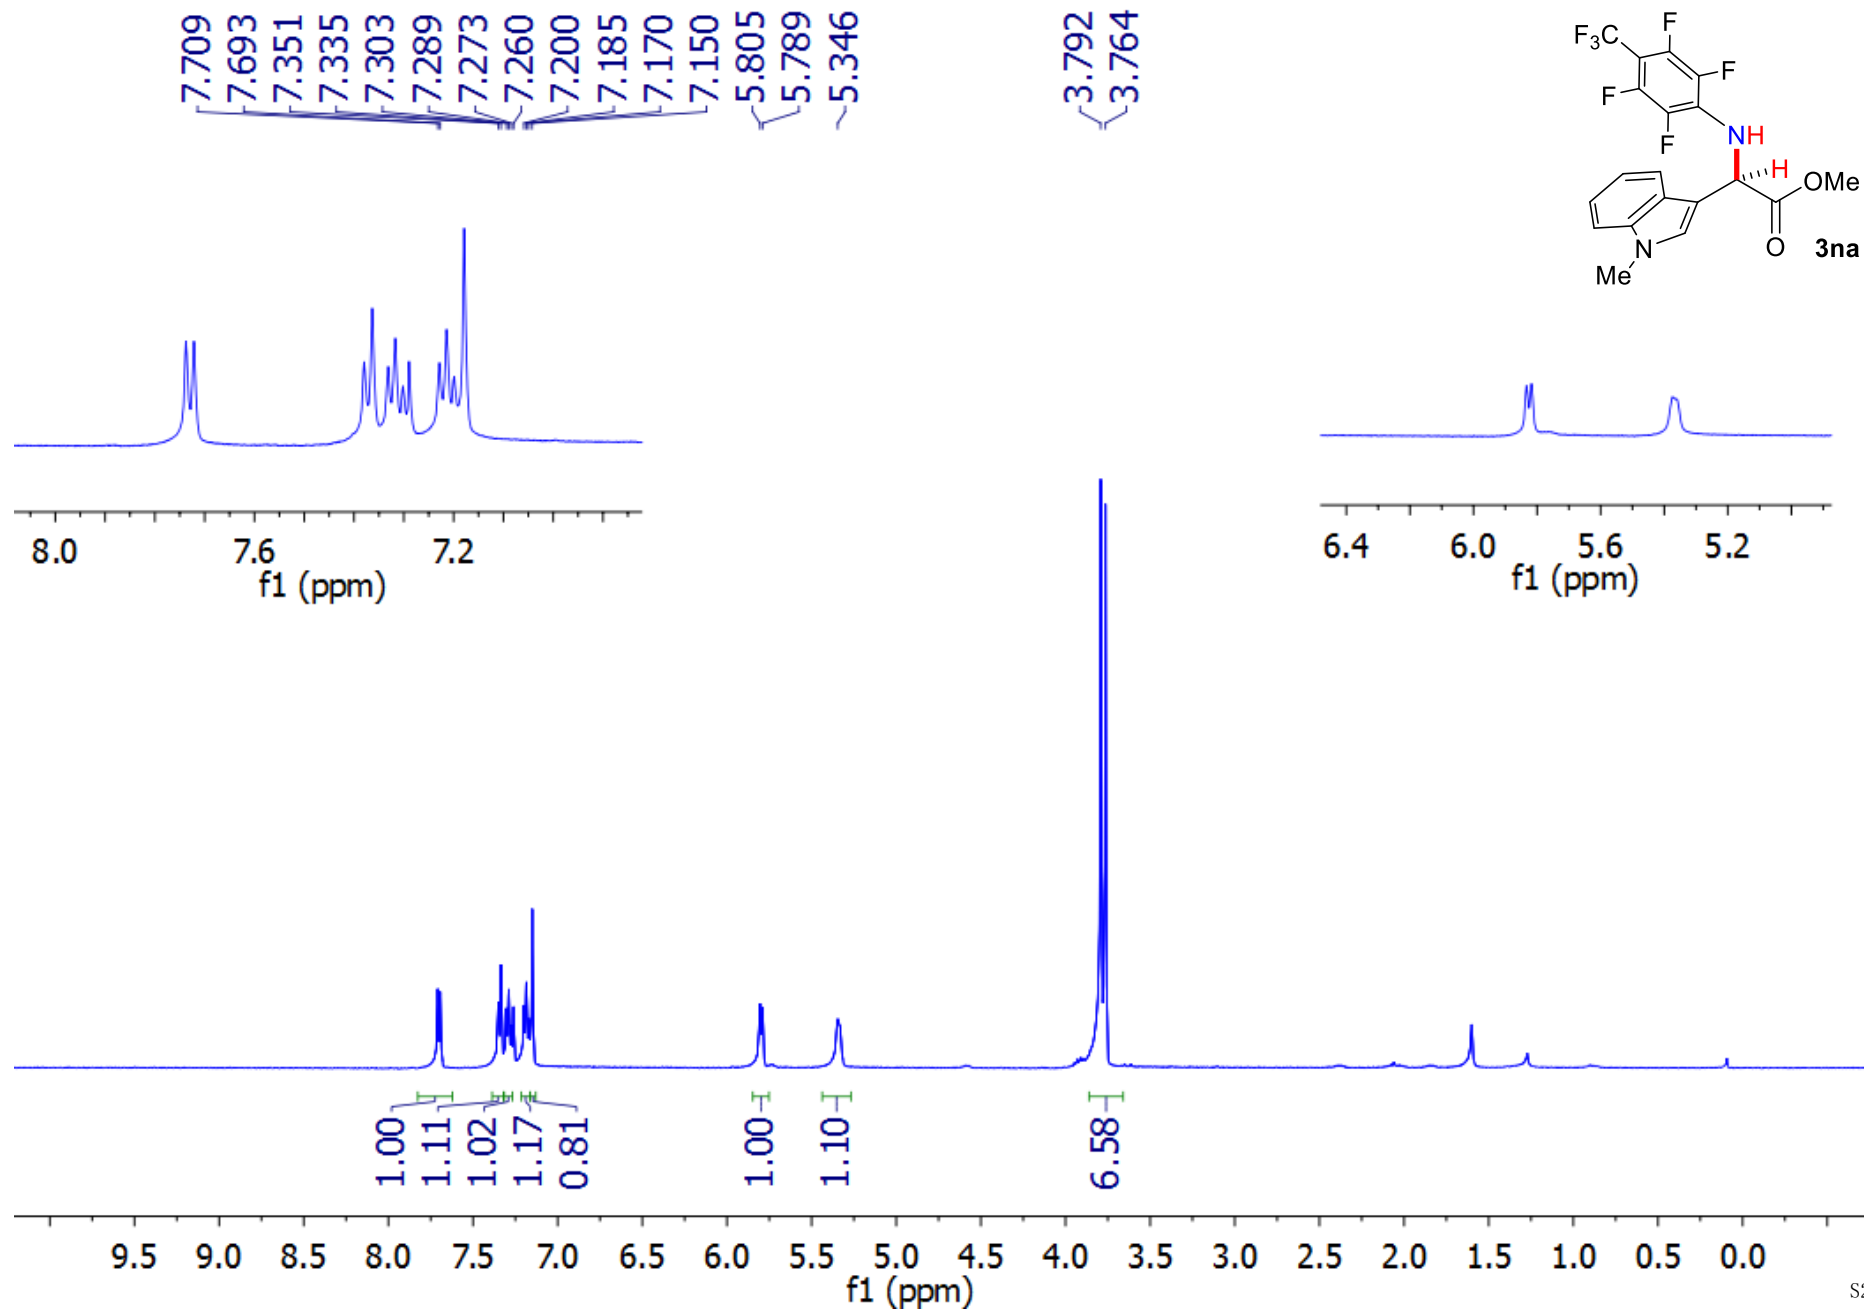

# $^{13}\text{C}$ NMR

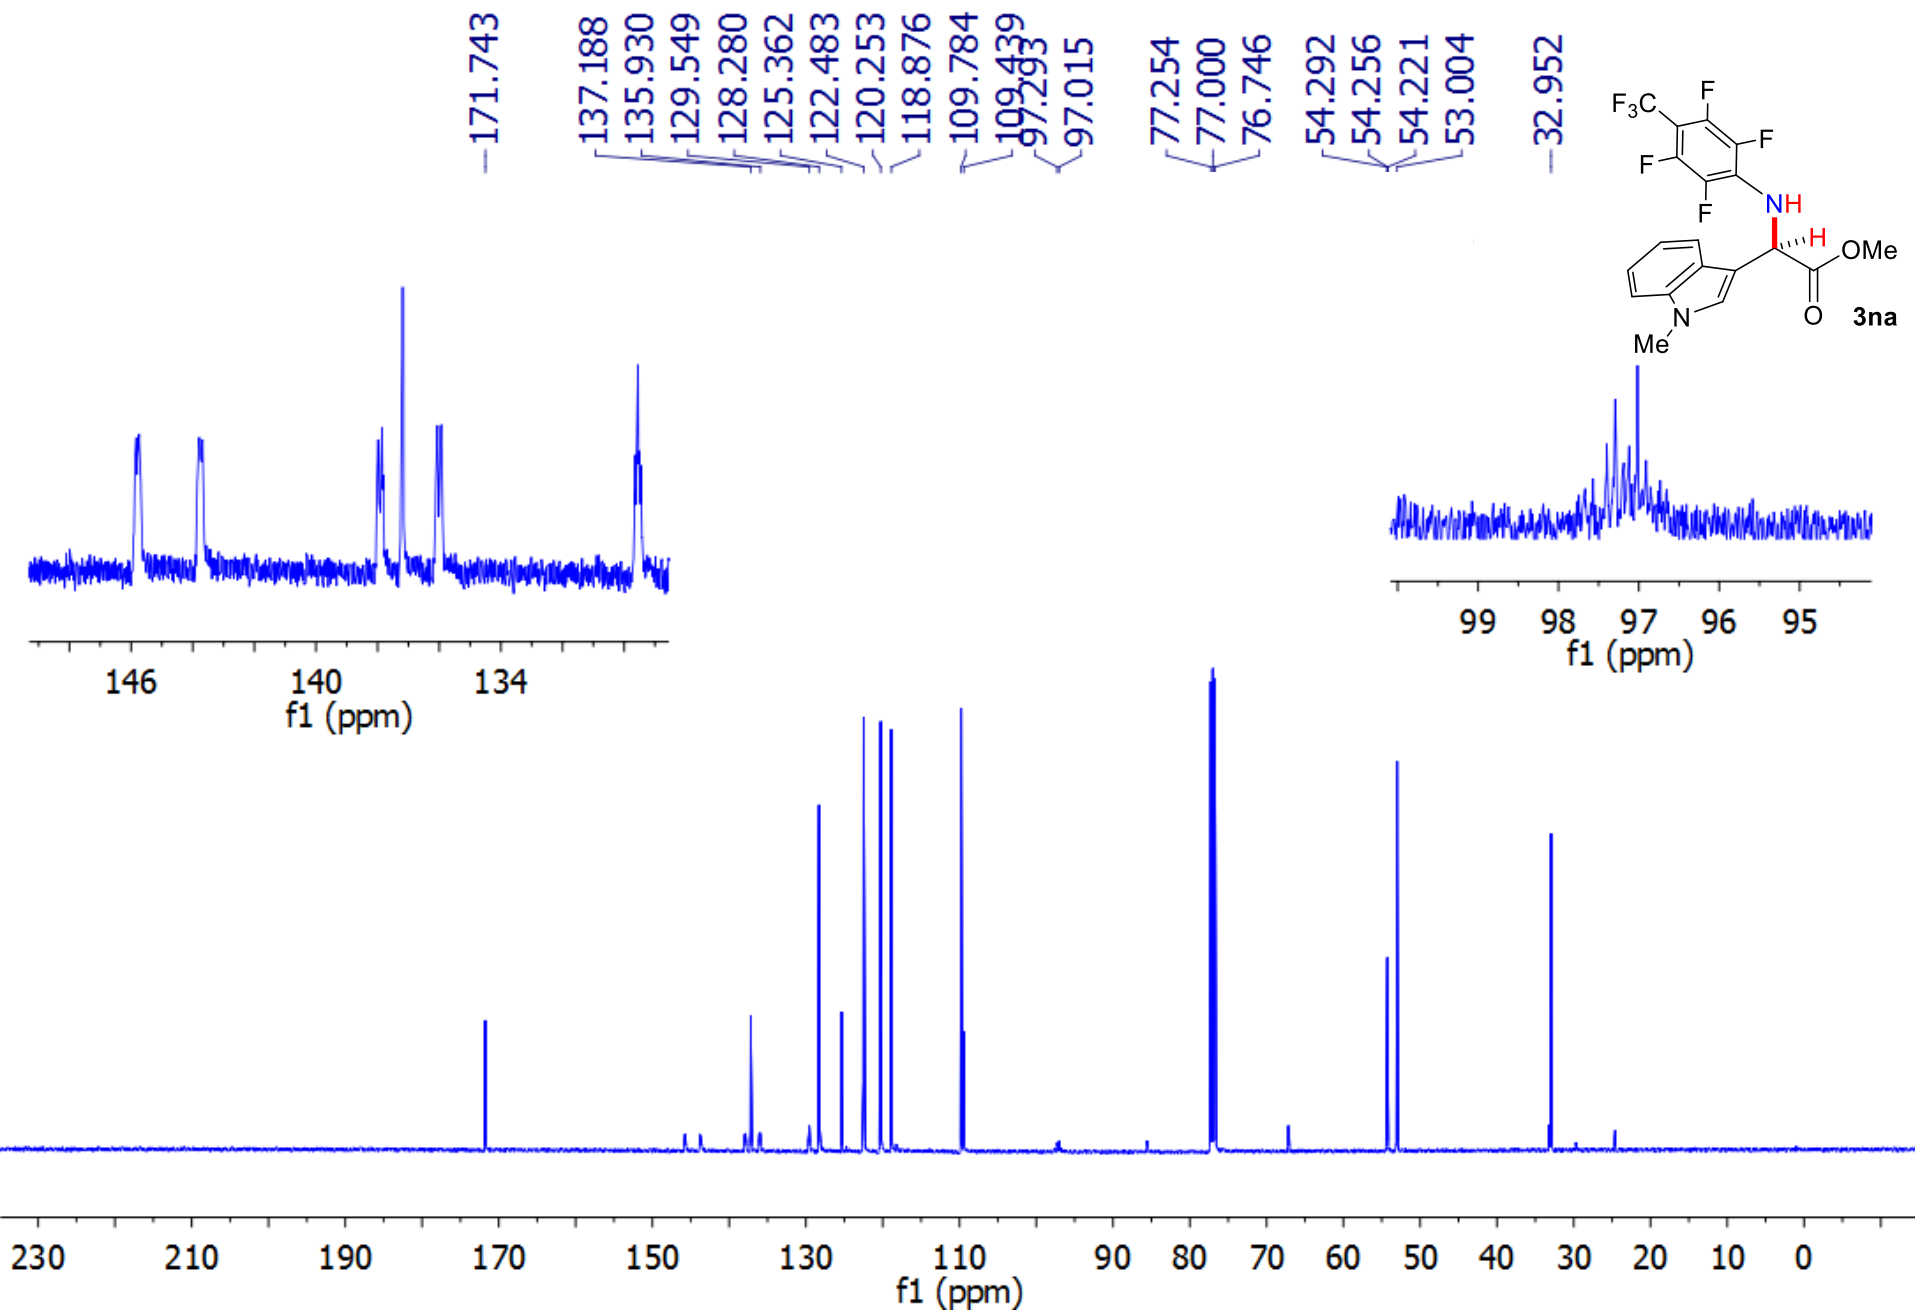

# $^{19}\text{F}$ NMR

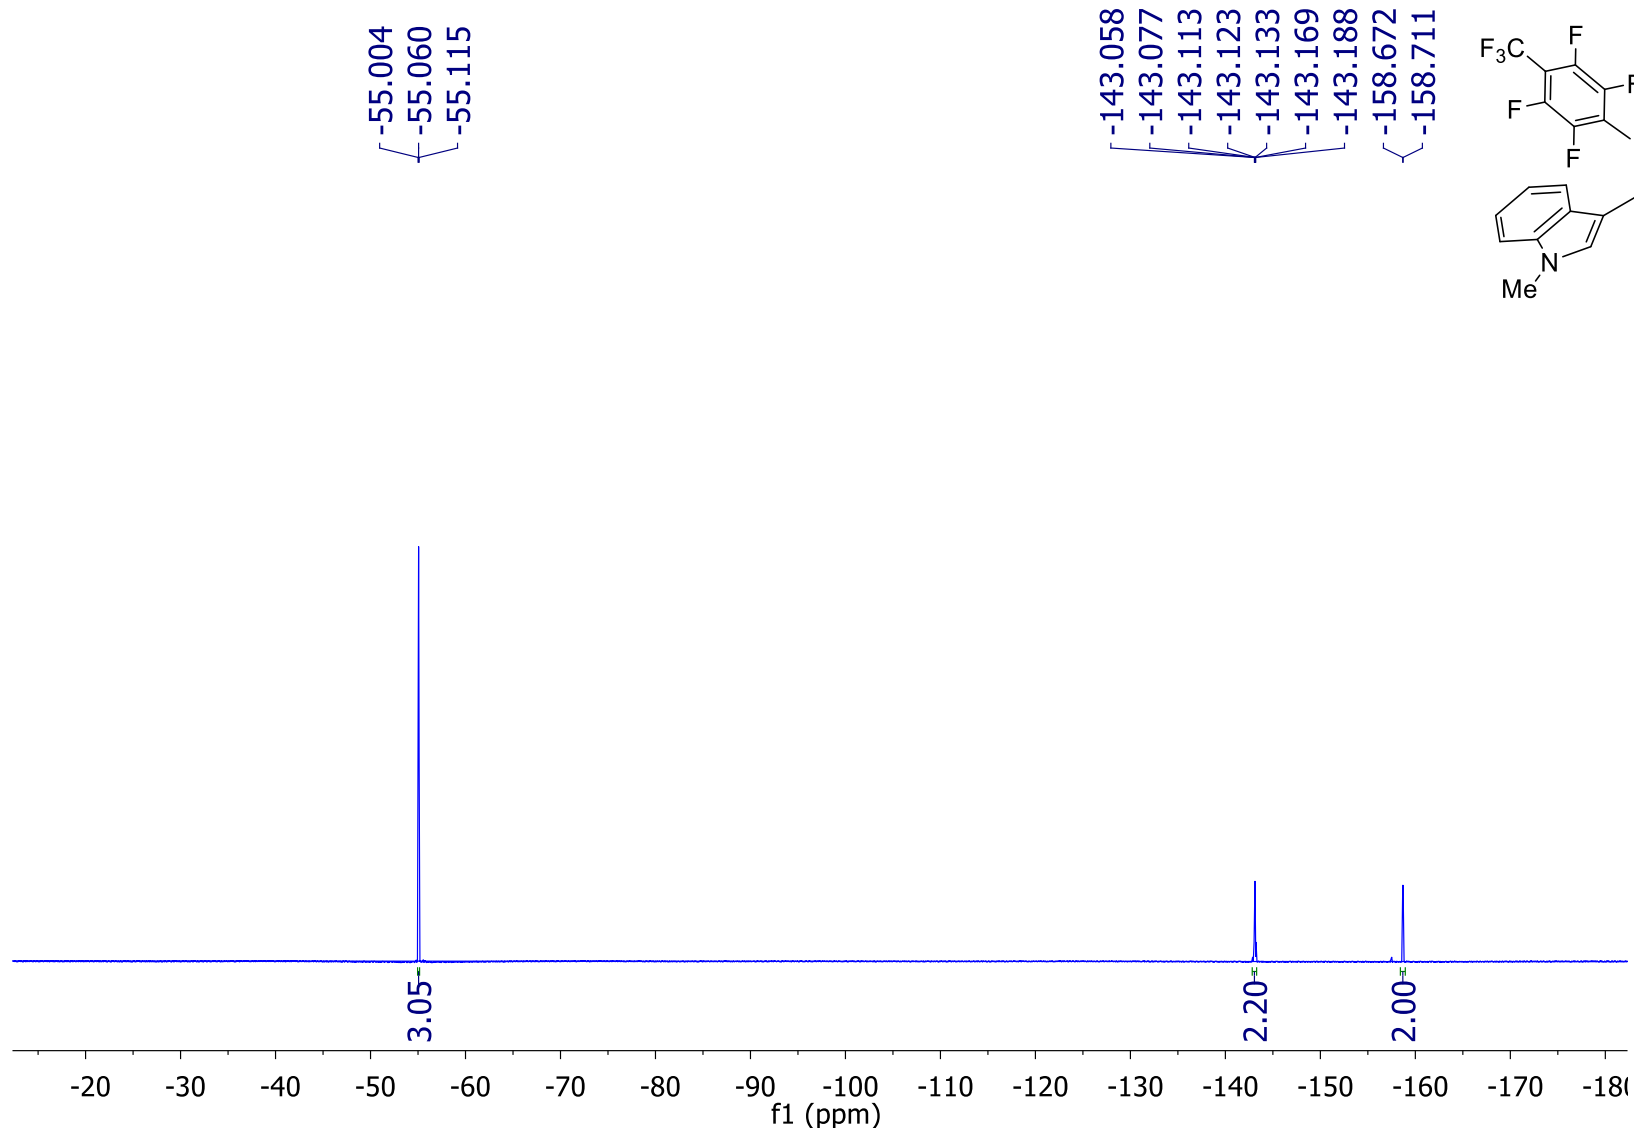

# HPLC

JLM-V-264-1-ADH-1%1ML

E:\SMJ 0% 1mL ADH.met

C:\EZStart\Projects\Default\Data\JLM-V-264-1-ADH1%1ML

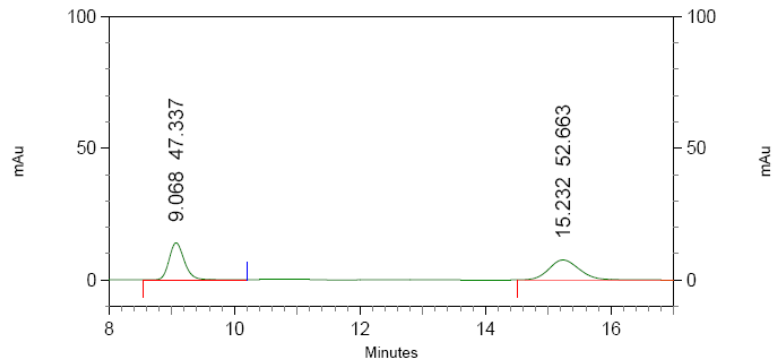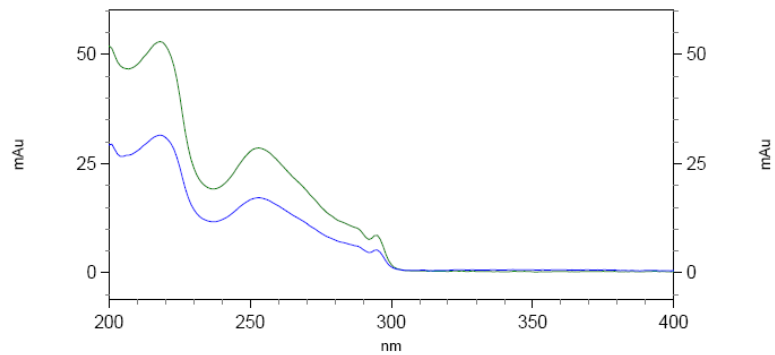

1: 260 nm, 4 nm

Results

| Name   | Retention Time | Area Percent | Pk # |
|--------|----------------|--------------|------|
|        | 9.068          | 47.337       | 1    |
|        | 15.232         | 52.663       | 2    |
| Totals |                | 100.000      |      |

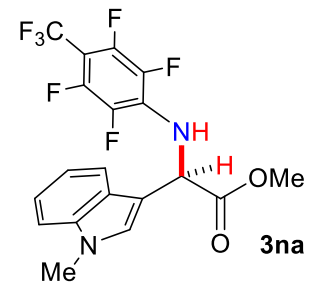

# HPLC

JLM-V-264-2-ADH-1%1ML

E:\SMJ 0% 1mL ADH.met

C:\EZStart\Projects\Default\Data\JLM-V-264-2-ADH1%1ML

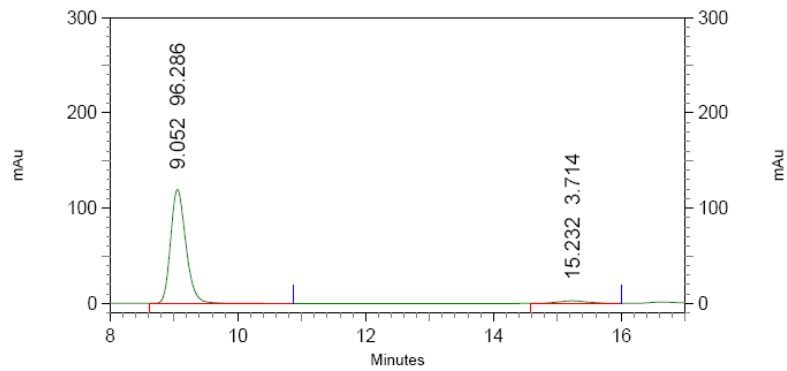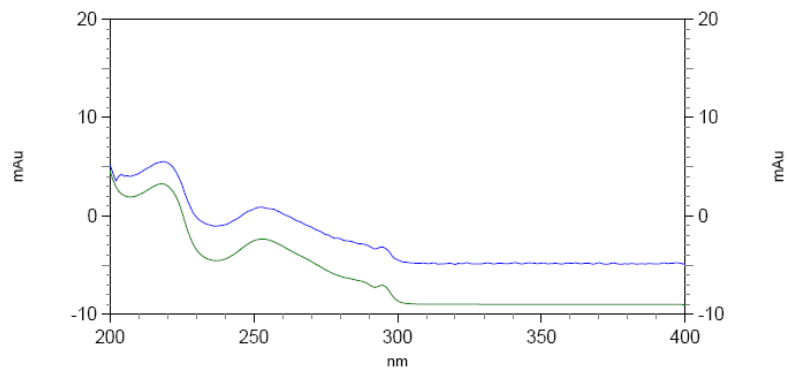

1: 260 nm, 4 nm

Results

| Name | Retention Time | Area Percent | Pk # |
|------|----------------|--------------|------|
|      | 9.052          | 96.286       | 1    |
|      | 15.232         | 3.714        | 2    |

|        |         |  |
|--------|---------|--|
| Totals | 100.000 |  |
|--------|---------|--|

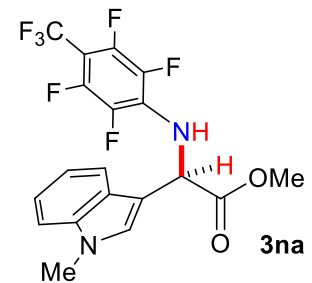

# $^1\text{H}$ NMR

7.260  
6.650  
6.647  
6.643  
6.084  
6.080  
5.586  
5.572  
4.967  
4.953  
3.792  
3.708

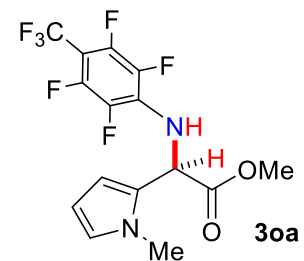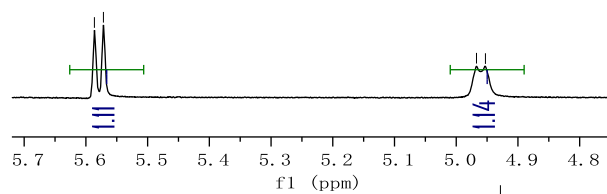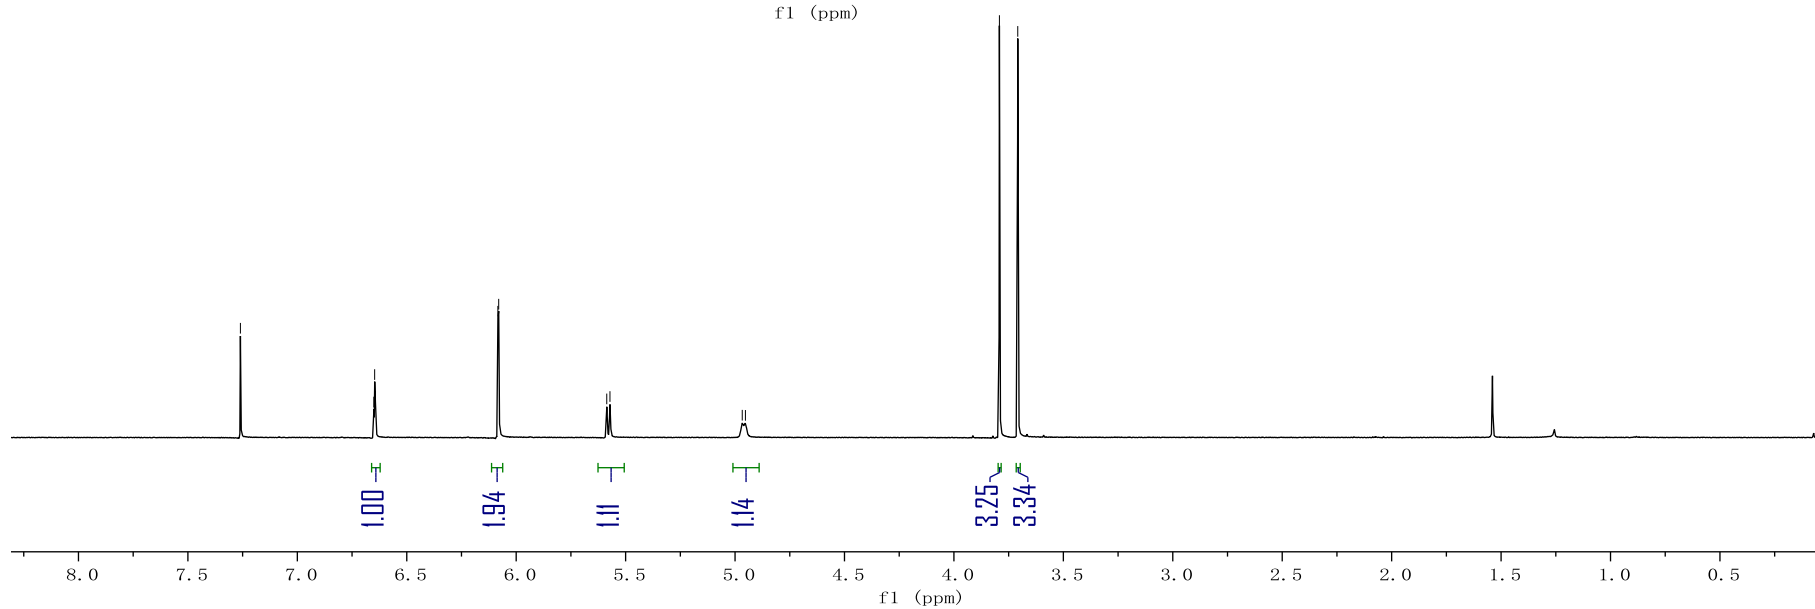

<sup>13</sup>C NMR

170.554  
145.883  
143.849  
138.216  
138.088  
136.292  
136.164  
129.302  
126.634  
124.298  
122.471  
120.296  
108.135  
107.531  
77.254  
77.000  
76.746  
53.754  
53.716  
53.679  
53.130  
33.916

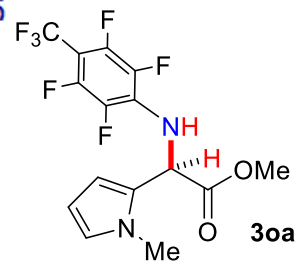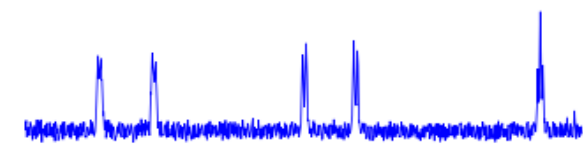

145  
140  
135  
130  
f1 (ppm)

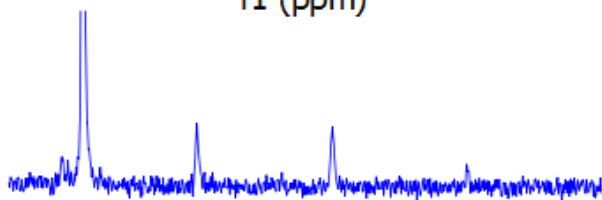

124  
121  
118  
f1 (ppm)

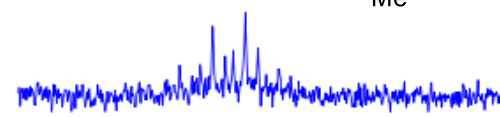

99  
98  
97  
96  
f1 (ppm)

230 210 190 170 150 130 110 90 80 70 60 50 40 30 20 10 0  
f1 (ppm)

<sup>19</sup>F NMR

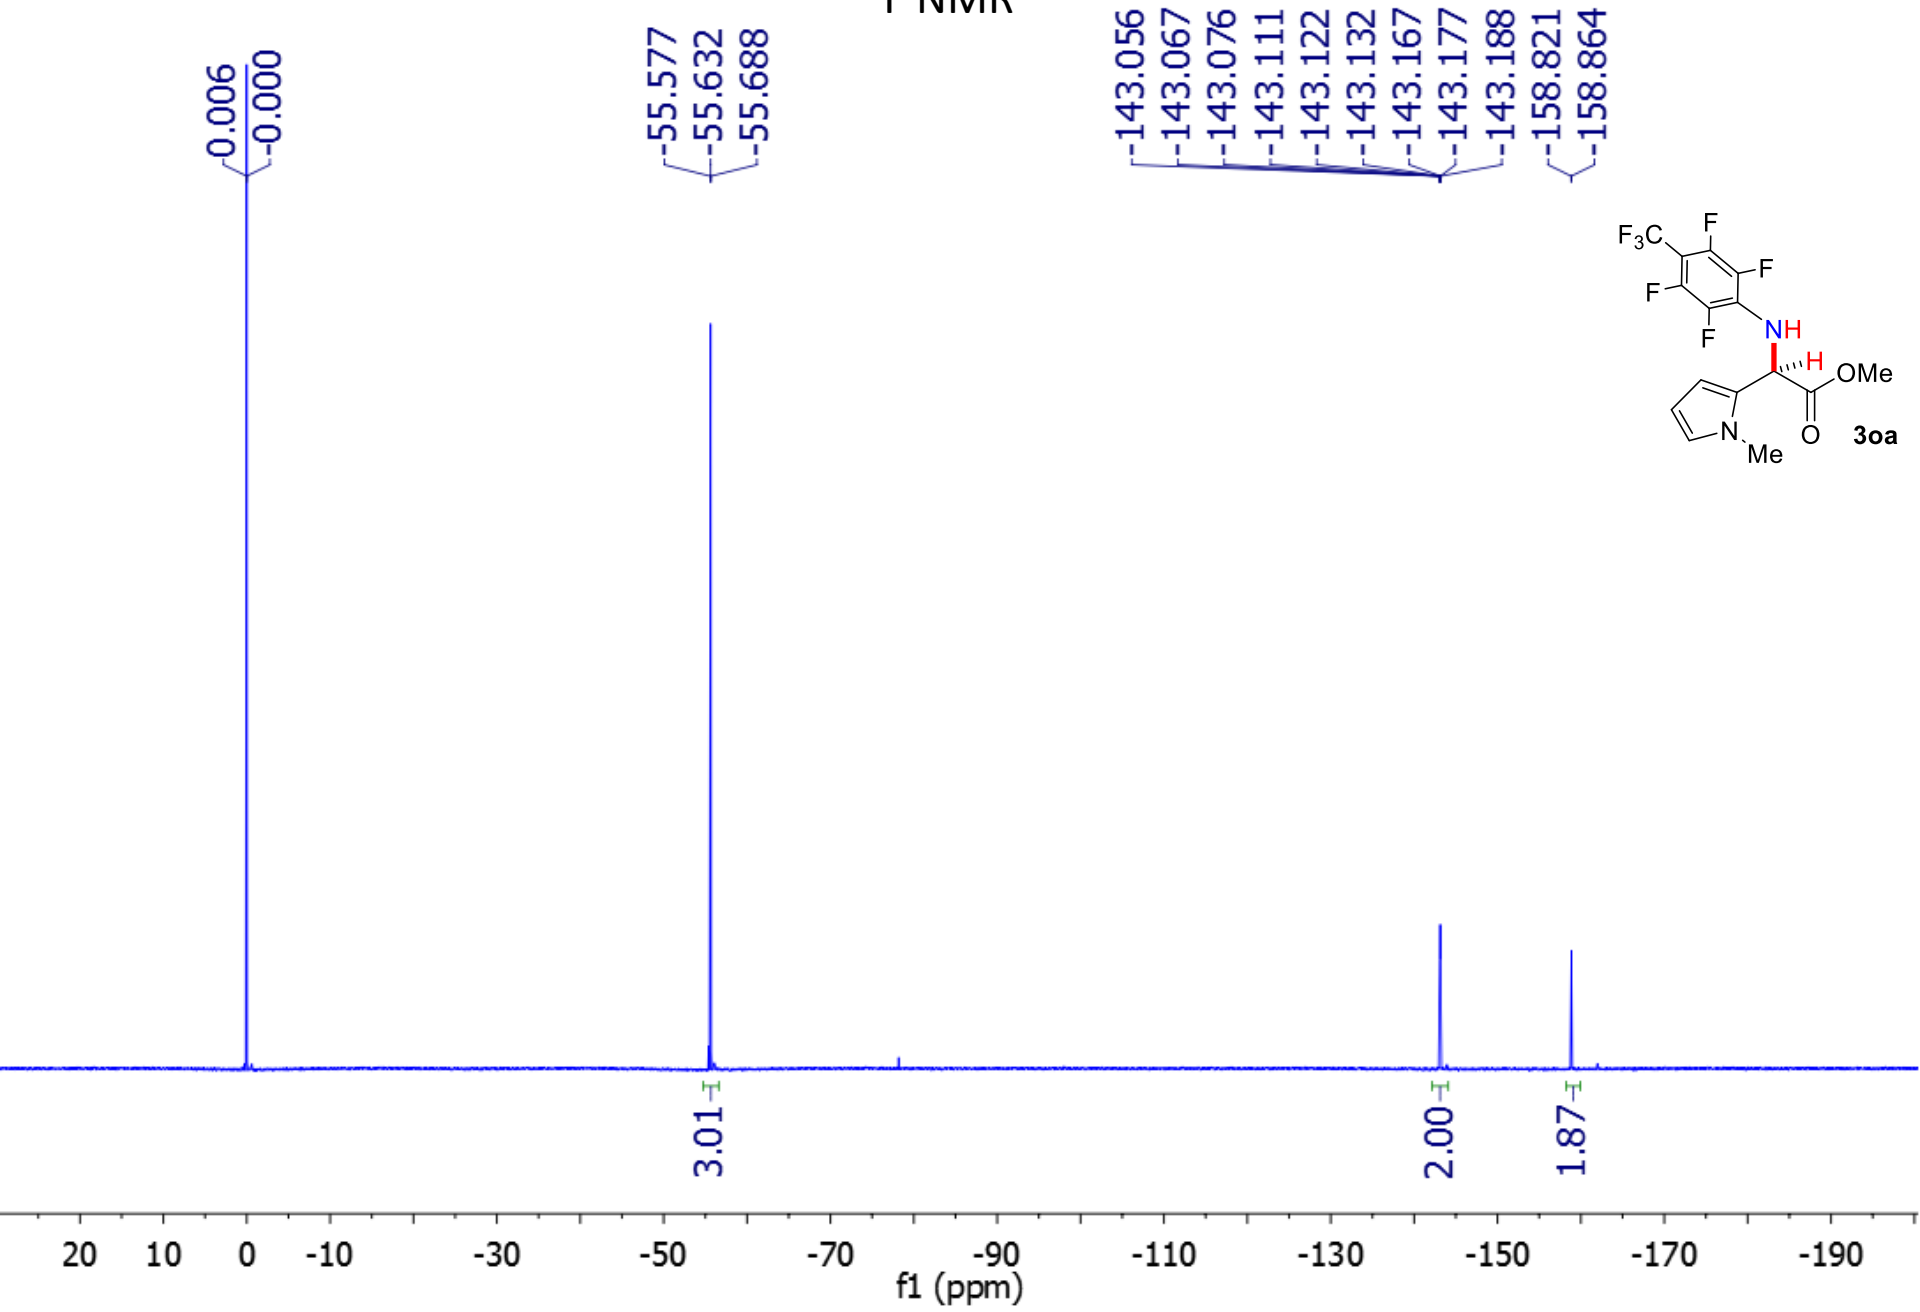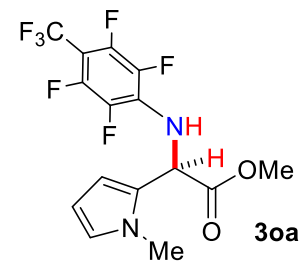



# HPLC

JLM-V-294-1-ADH-1%1ML  
C:\EZStart\Projects\Default\Data\JLM-V-294-1-ADH1%1ML  
C:\EZStart\Projects\Default\Method\YC-1%-OJH1ml.met  
AD-H column 20%IPA @ 0.8ml/min

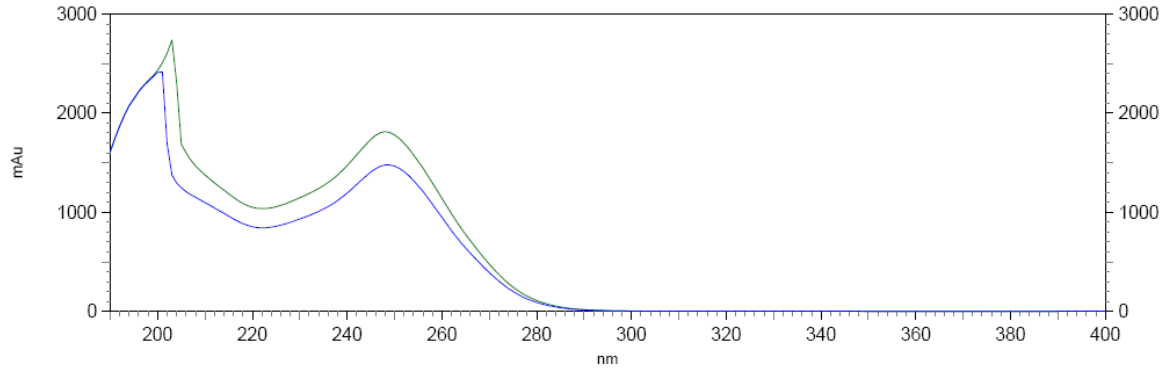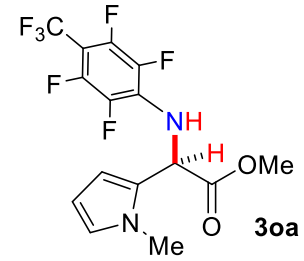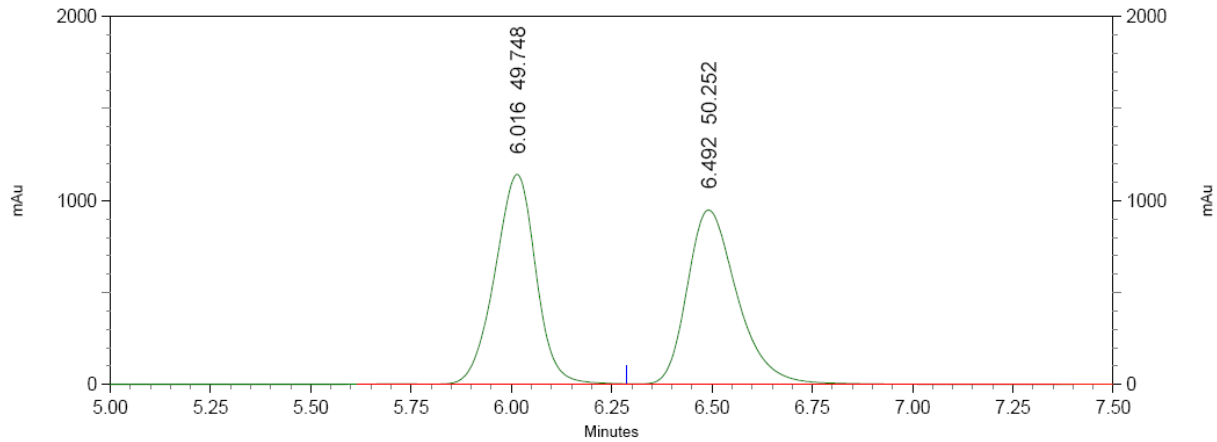

1: 260 nm, 4 nm Results

| Pk # | Retention Time | Area Percent |
|------|----------------|--------------|
| 1    | 6.016          | 49.748       |
| 2    | 6.492          | 50.252       |

|        |         |
|--------|---------|
| Totals | 100.000 |
|--------|---------|

# HPLC

JLM-V-294-2a-ADH-1%1ML  
C:\EZStart\Projects\Default\Data\JLM-V-294-2a-ADH1%1ML  
C:\EZStart\Projects\Default\Method\YC-1%-OJH1ml.met  
AD-H column 20%IPA @ 0.8ml/min

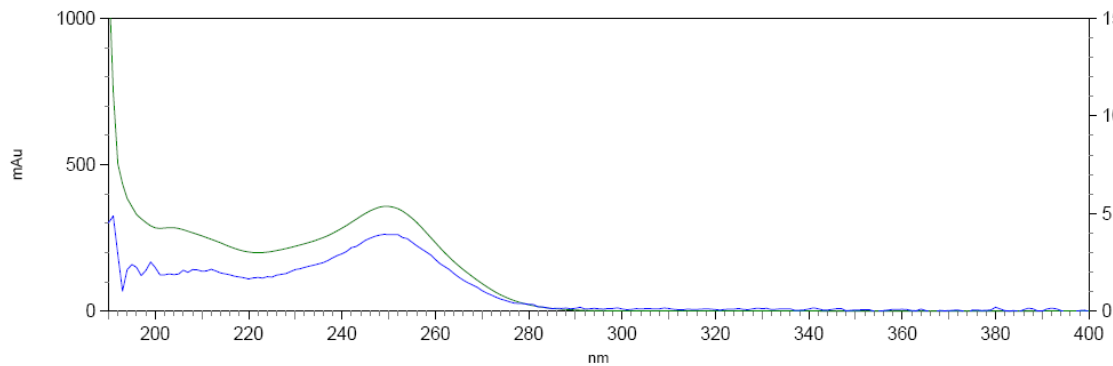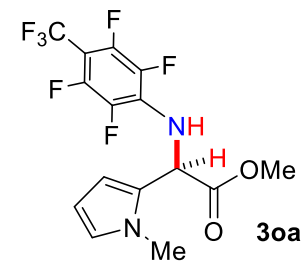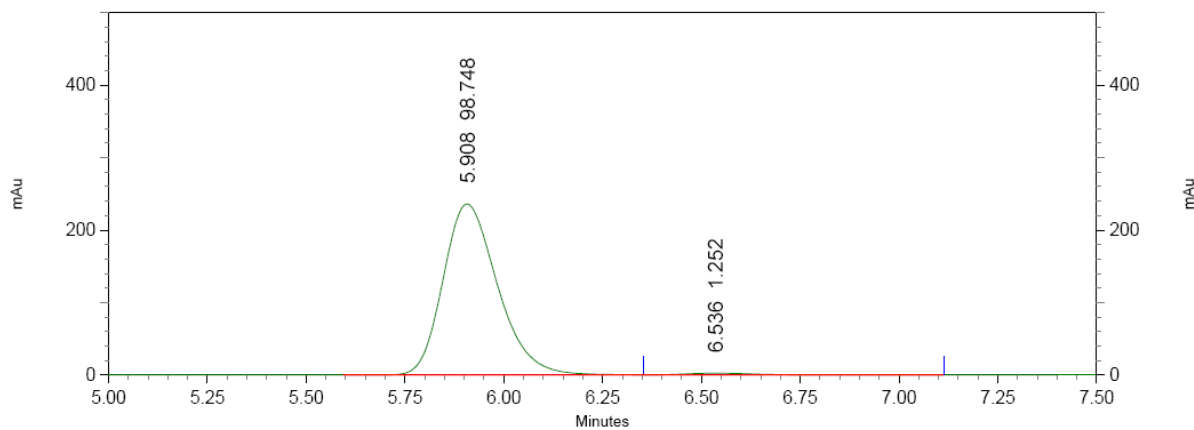

1: 260 nm, 4 nm Results

| Pk # | Retention Time | Area Percent |
|------|----------------|--------------|
| 1    | 5.908          | 98.748       |
| 2    | 6.536          | 1.252        |

| Totals | Area Percent |
|--------|--------------|
|        | 100.000      |

# $^1\text{H}$ NMR

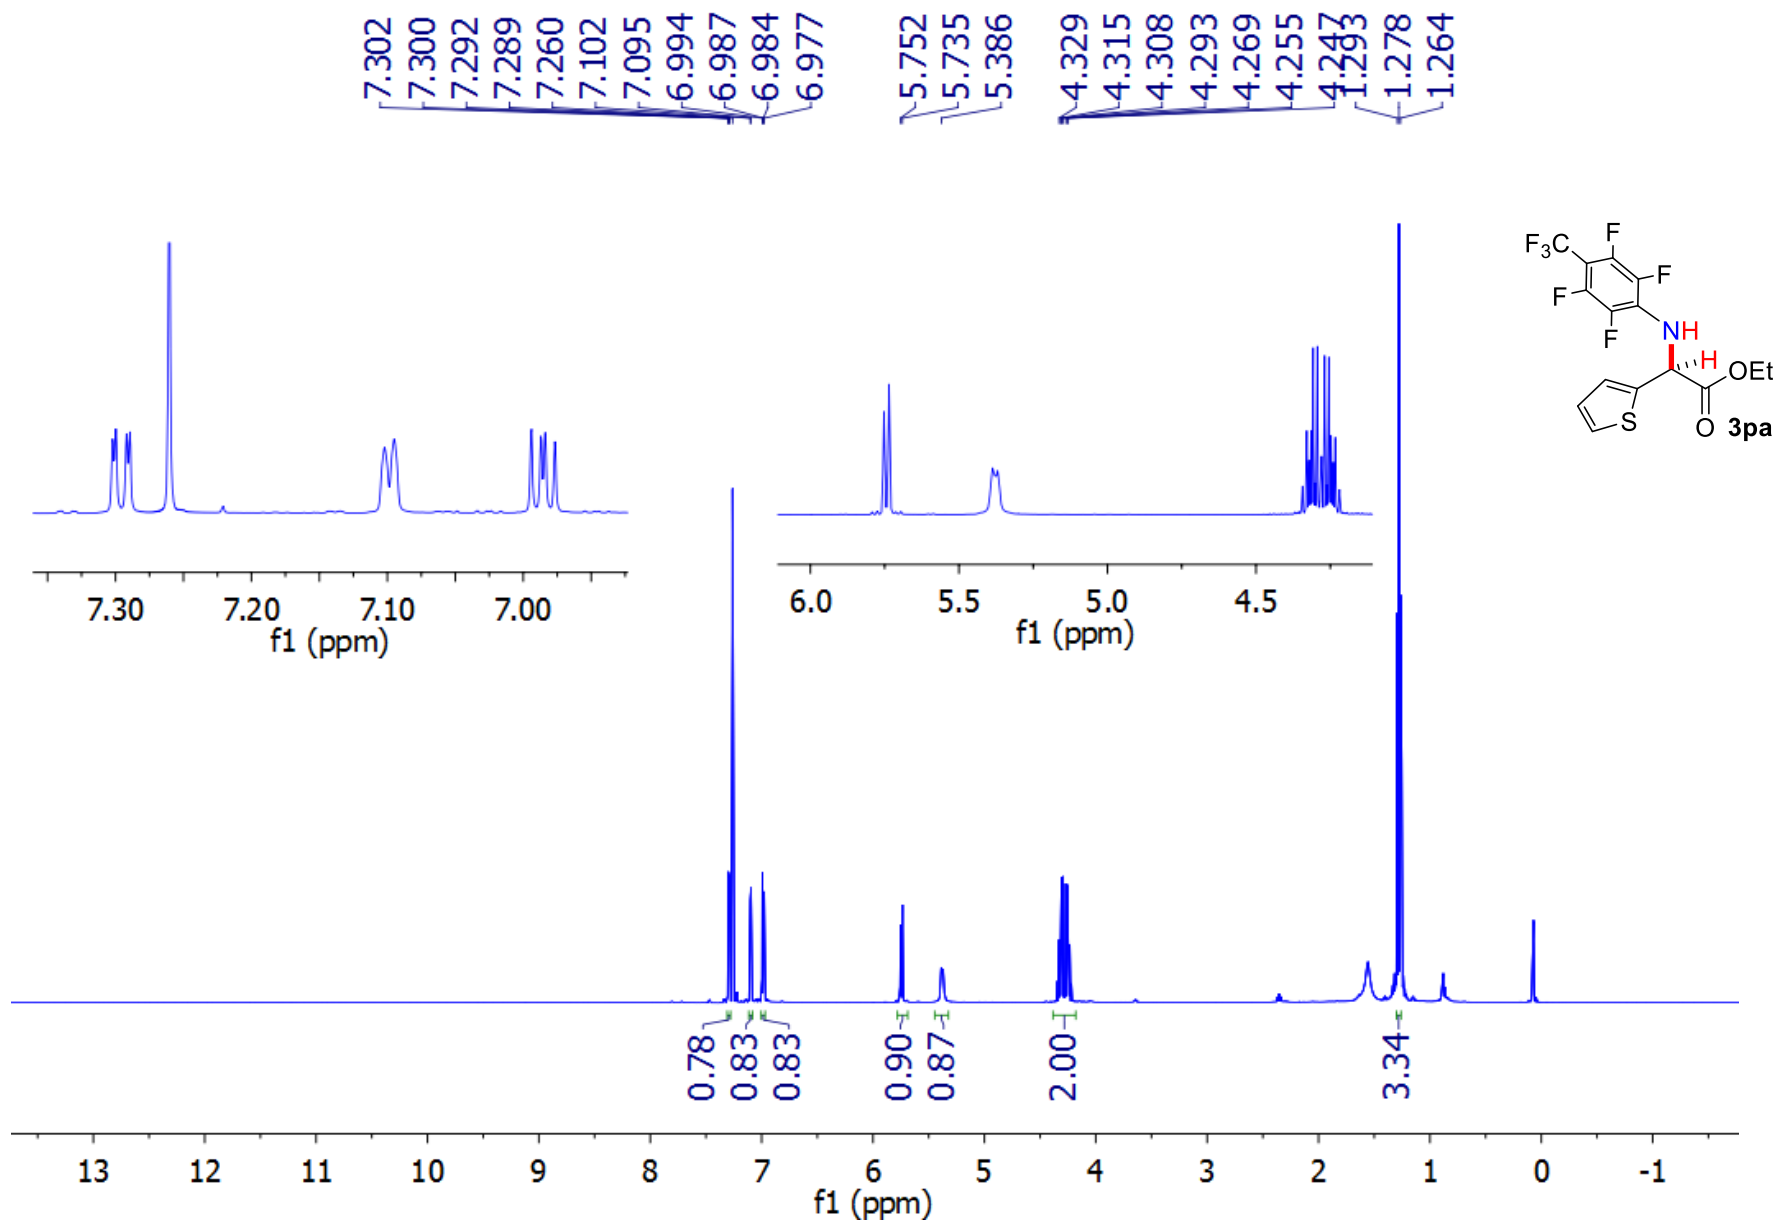

<sup>13</sup>C NMR

169.849

145.892

143.724

139.184

138.029

136.108

128.906

127.241

126.458

126.377

122.464

97.981

77.269

77.015

76.761

62.776

56.479

56.442

56.405

13.971

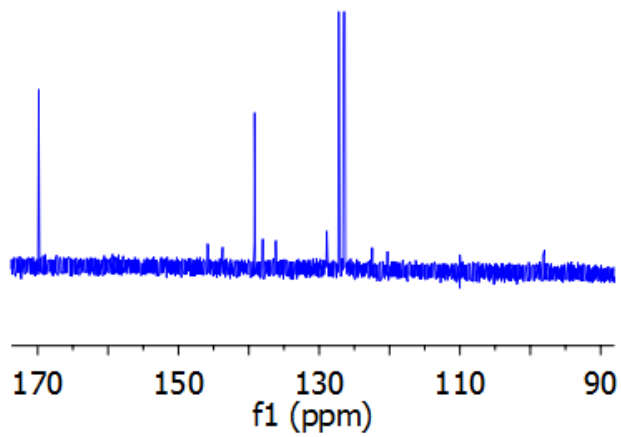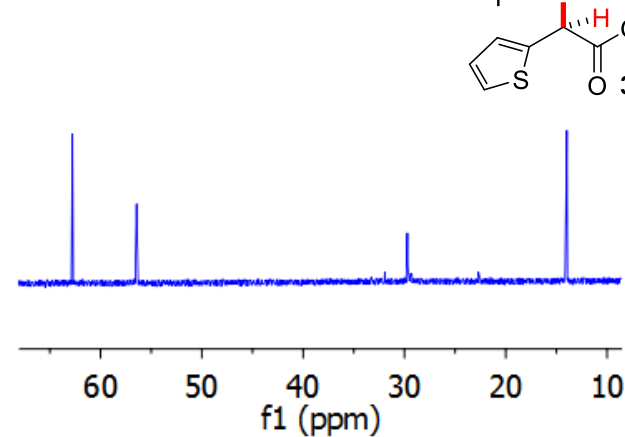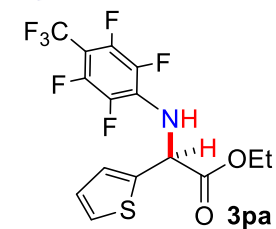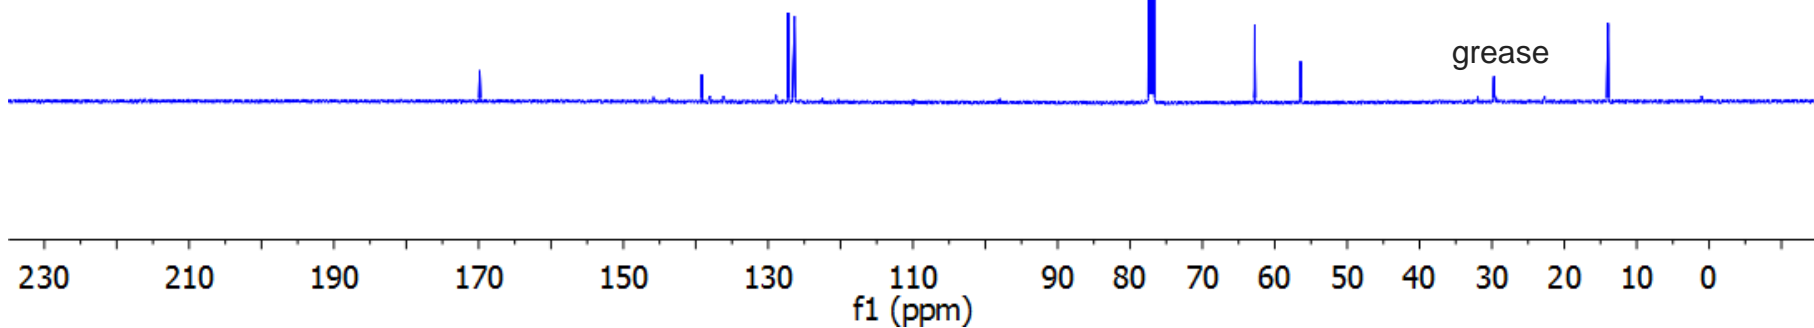

# $^{19}\text{F}$ NMR

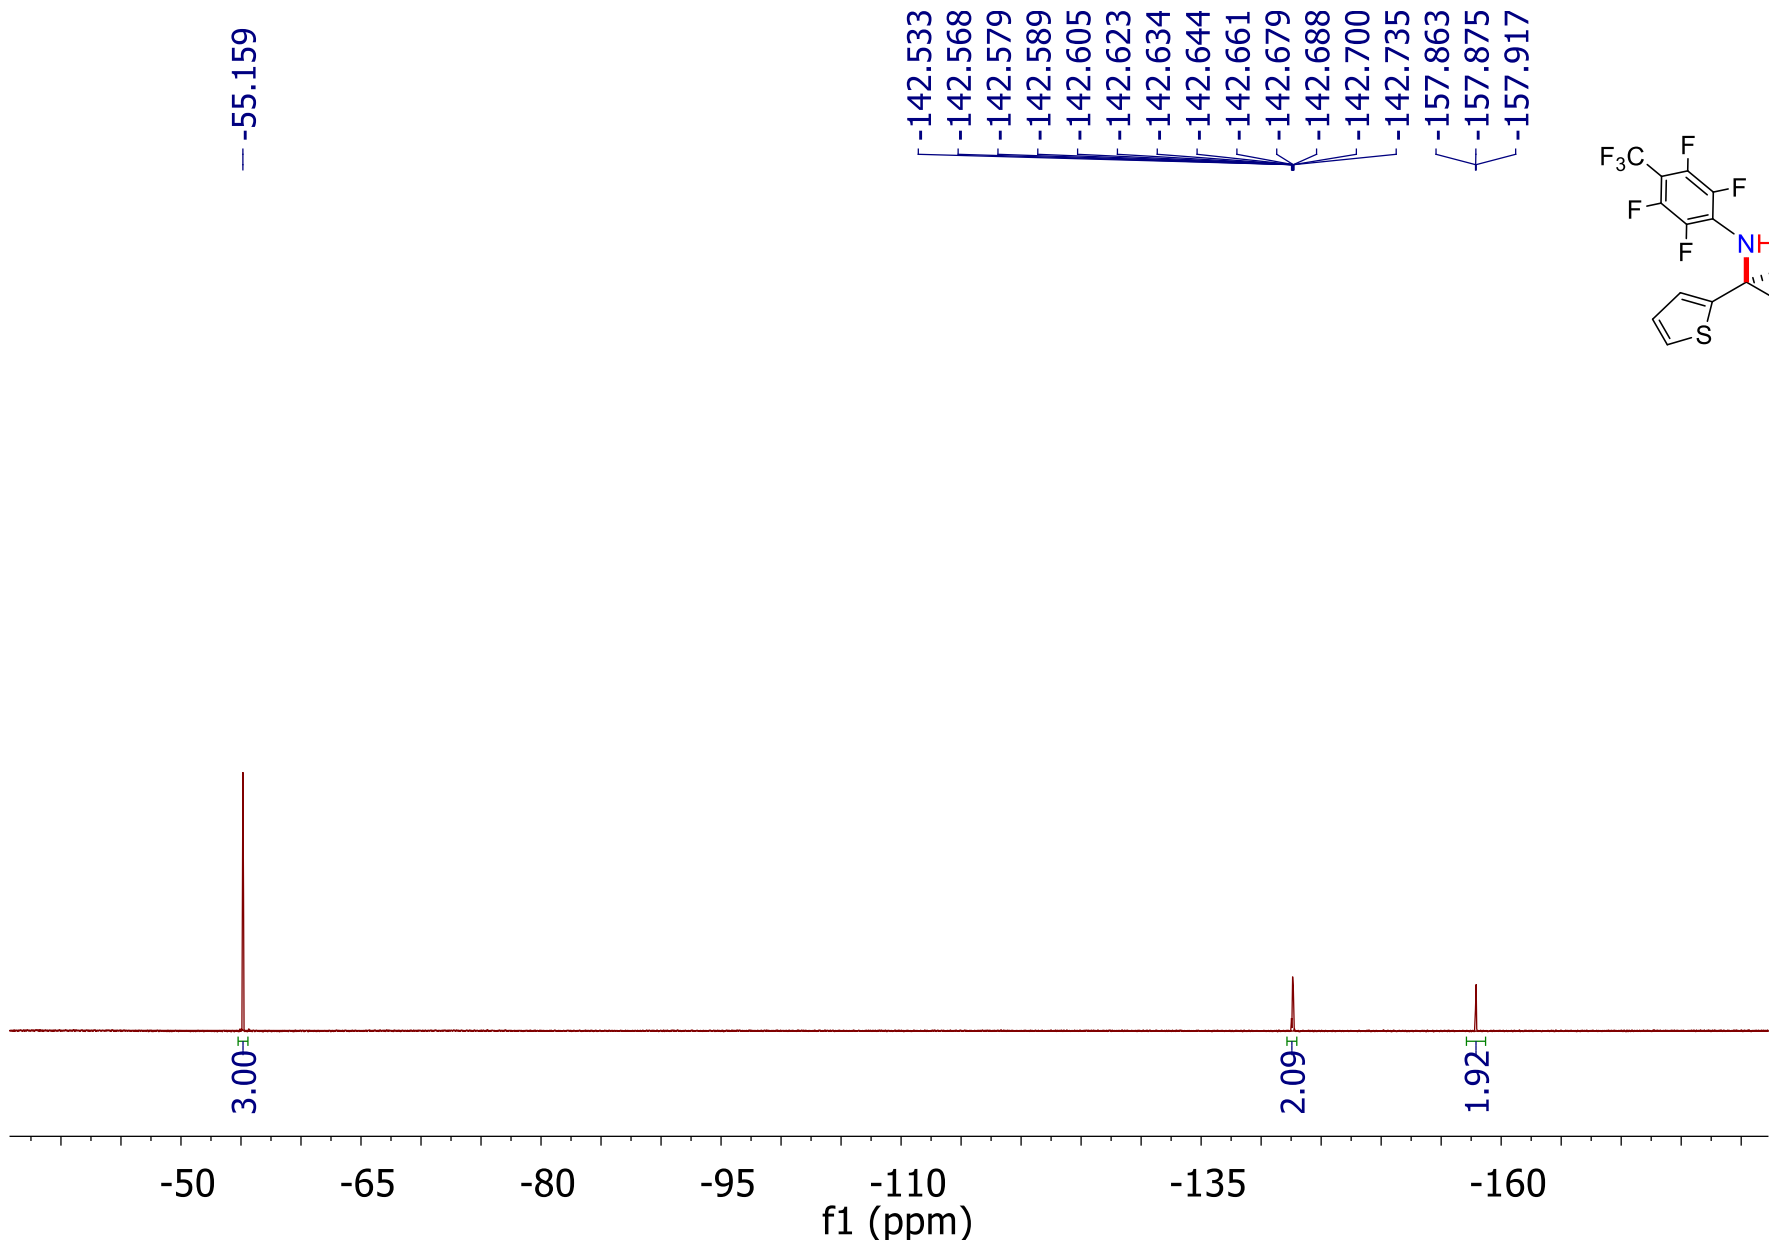

# HPLC

JLM-V-144-1a-ODH1%0.7ML

C:\EZStart\Projects\Default\Method\JLM-ODH-0.2%-0.7ml.met

C:\EZStart\Projects\Default\Data\JLM-V-144-1a-ODH1%0.7ML

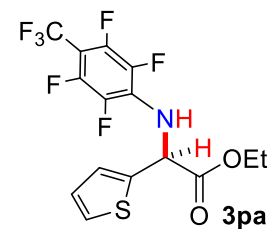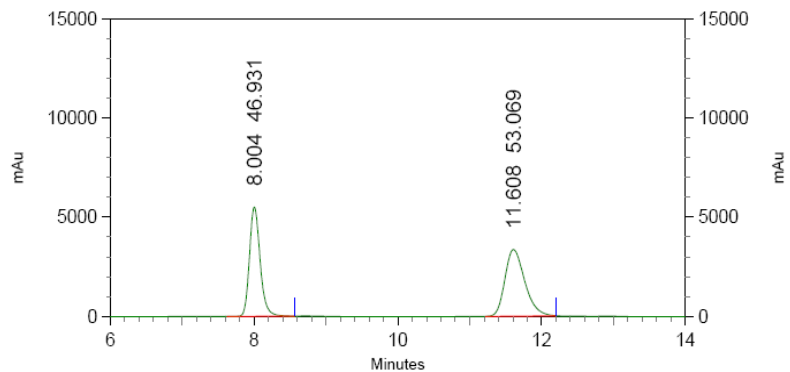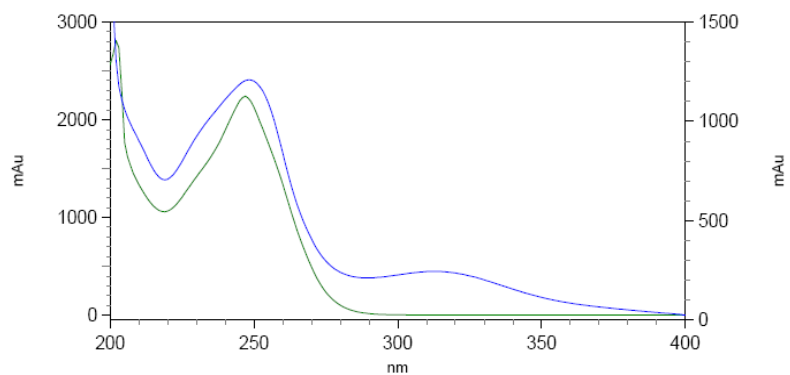

3: 254 nm, 4 nm

Results

| Pk #   | Name | Retention Time | Area Percent |
|--------|------|----------------|--------------|
| 1      |      | 8.004          | 46.931       |
| 2      |      | 11.608         | 53.069       |
| Totals |      |                | 100.000      |

# HPLC

JLM-V-144-2a-ODH1%0.7ML

C:\EZStart\Projects\Default\Method\JLM-ODH-0.2%-0.7ml.met

C:\EZStart\Projects\Default\Data\JLM-V-144-2a-ODH1%0.7ML

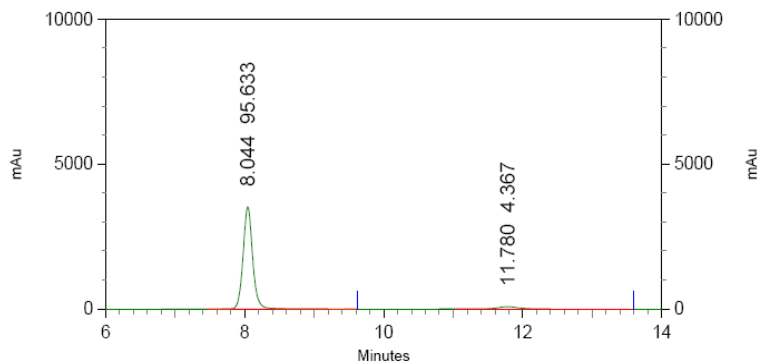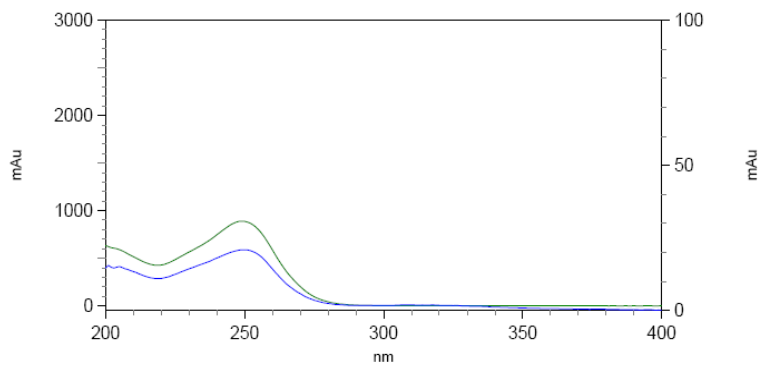

4: 247 nm, 4 nm

Results

| Pk # | Name | Retention Time | Area Percent |
|------|------|----------------|--------------|
| 1    |      | 8.044          | 95.633       |
| 2    |      | 11.780         | 4.367        |

|        |  |  |         |
|--------|--|--|---------|
| Totals |  |  | 100.000 |
|--------|--|--|---------|

# <sup>1</sup>H NMR

7.401  
7.398  
7.388  
7.367  
7.355  
7.355  
7.310  
7.307  
7.298  
7.295  
7.250  
7.119  
7.109  
7.093  
7.083  
6.007  
6.004  
5.980  
5.978  
5.615  
5.606  
5.602  
5.591  
4.500  
4.485  
4.221  
4.219  
4.209  
4.207  
4.197  
4.195  
4.185  
4.183

1.298  
1.286  
1.274

6.007  
6.004  
5.980  
5.978

5.615  
5.606  
5.602  
5.591

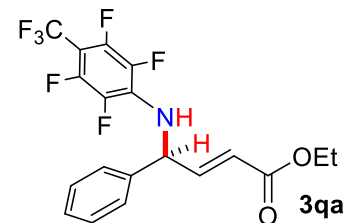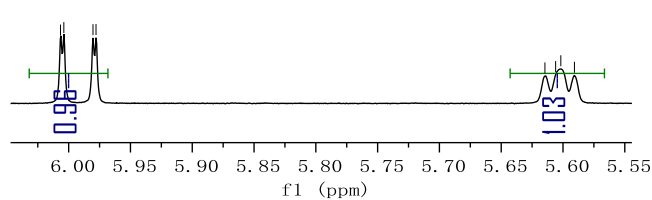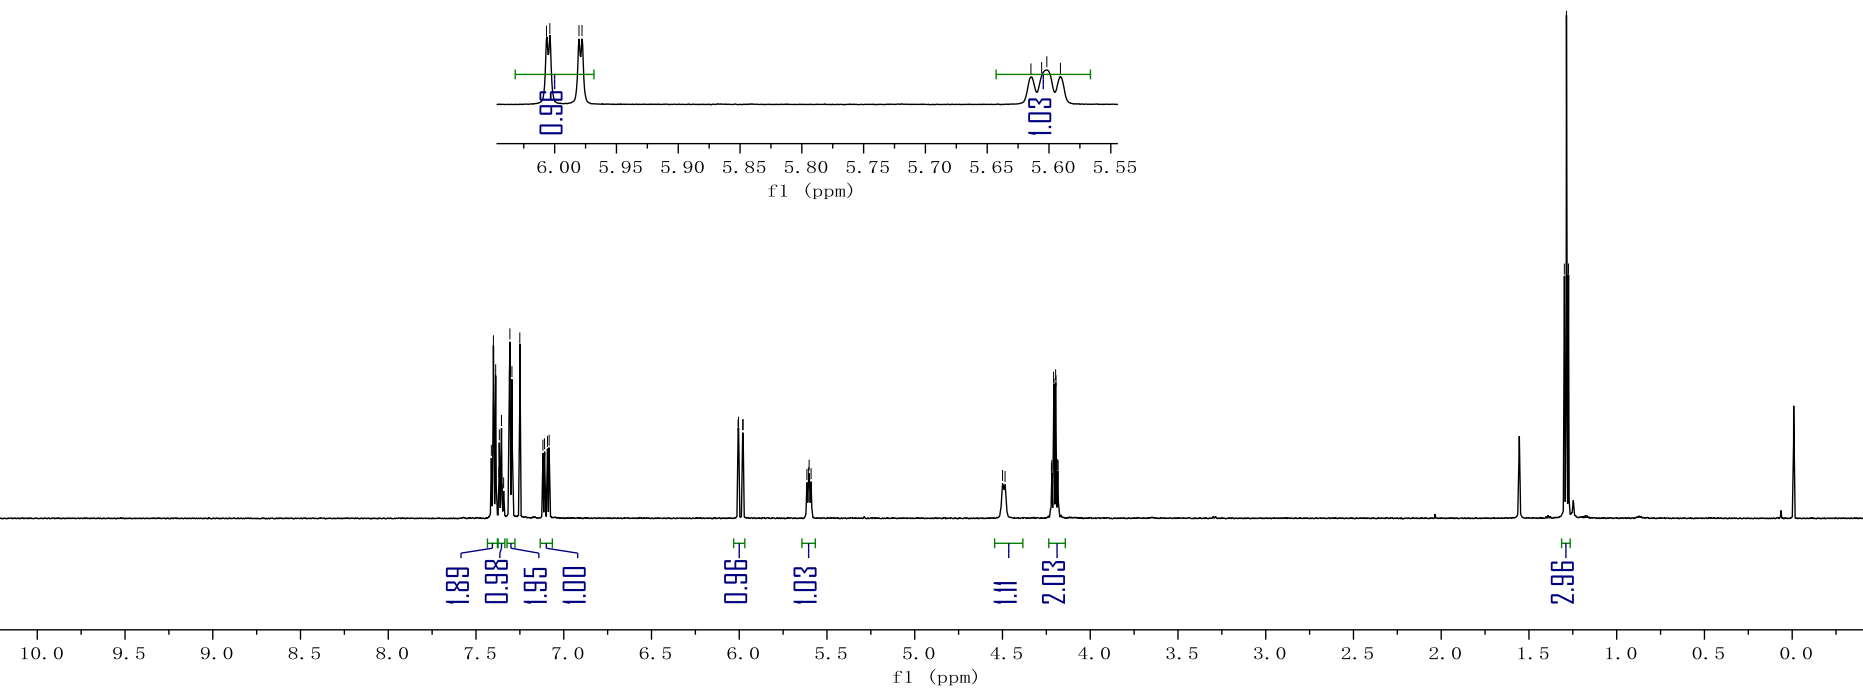



<sup>13</sup>C NMR

165.644  
146.029  
145.755  
145.649  
144.001  
143.952  
143.936  
143.851  
138.639  
137.639  
137.605  
137.501  
137.467  
136.041  
136.007  
135.977  
135.938  
135.905  
135.872  
129.447  
129.384  
129.361  
129.288  
128.782  
126.889  
124.017  
122.604  
122.207  
120.397  
118.586  
97.856  
97.768  
97.679  
97.623  
97.535  
97.444  
60.775  
59.447  
59.416  
59.386  
14.083

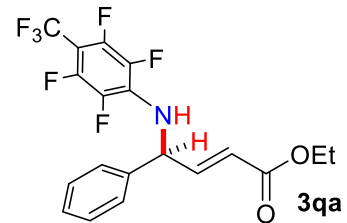

200 190 180 170 160 150 140 130 120 110 100 90 80 70 60 50 40 30 20 10 0 -10  
f1 (ppm)

# $^{19}\text{F}$ NMR

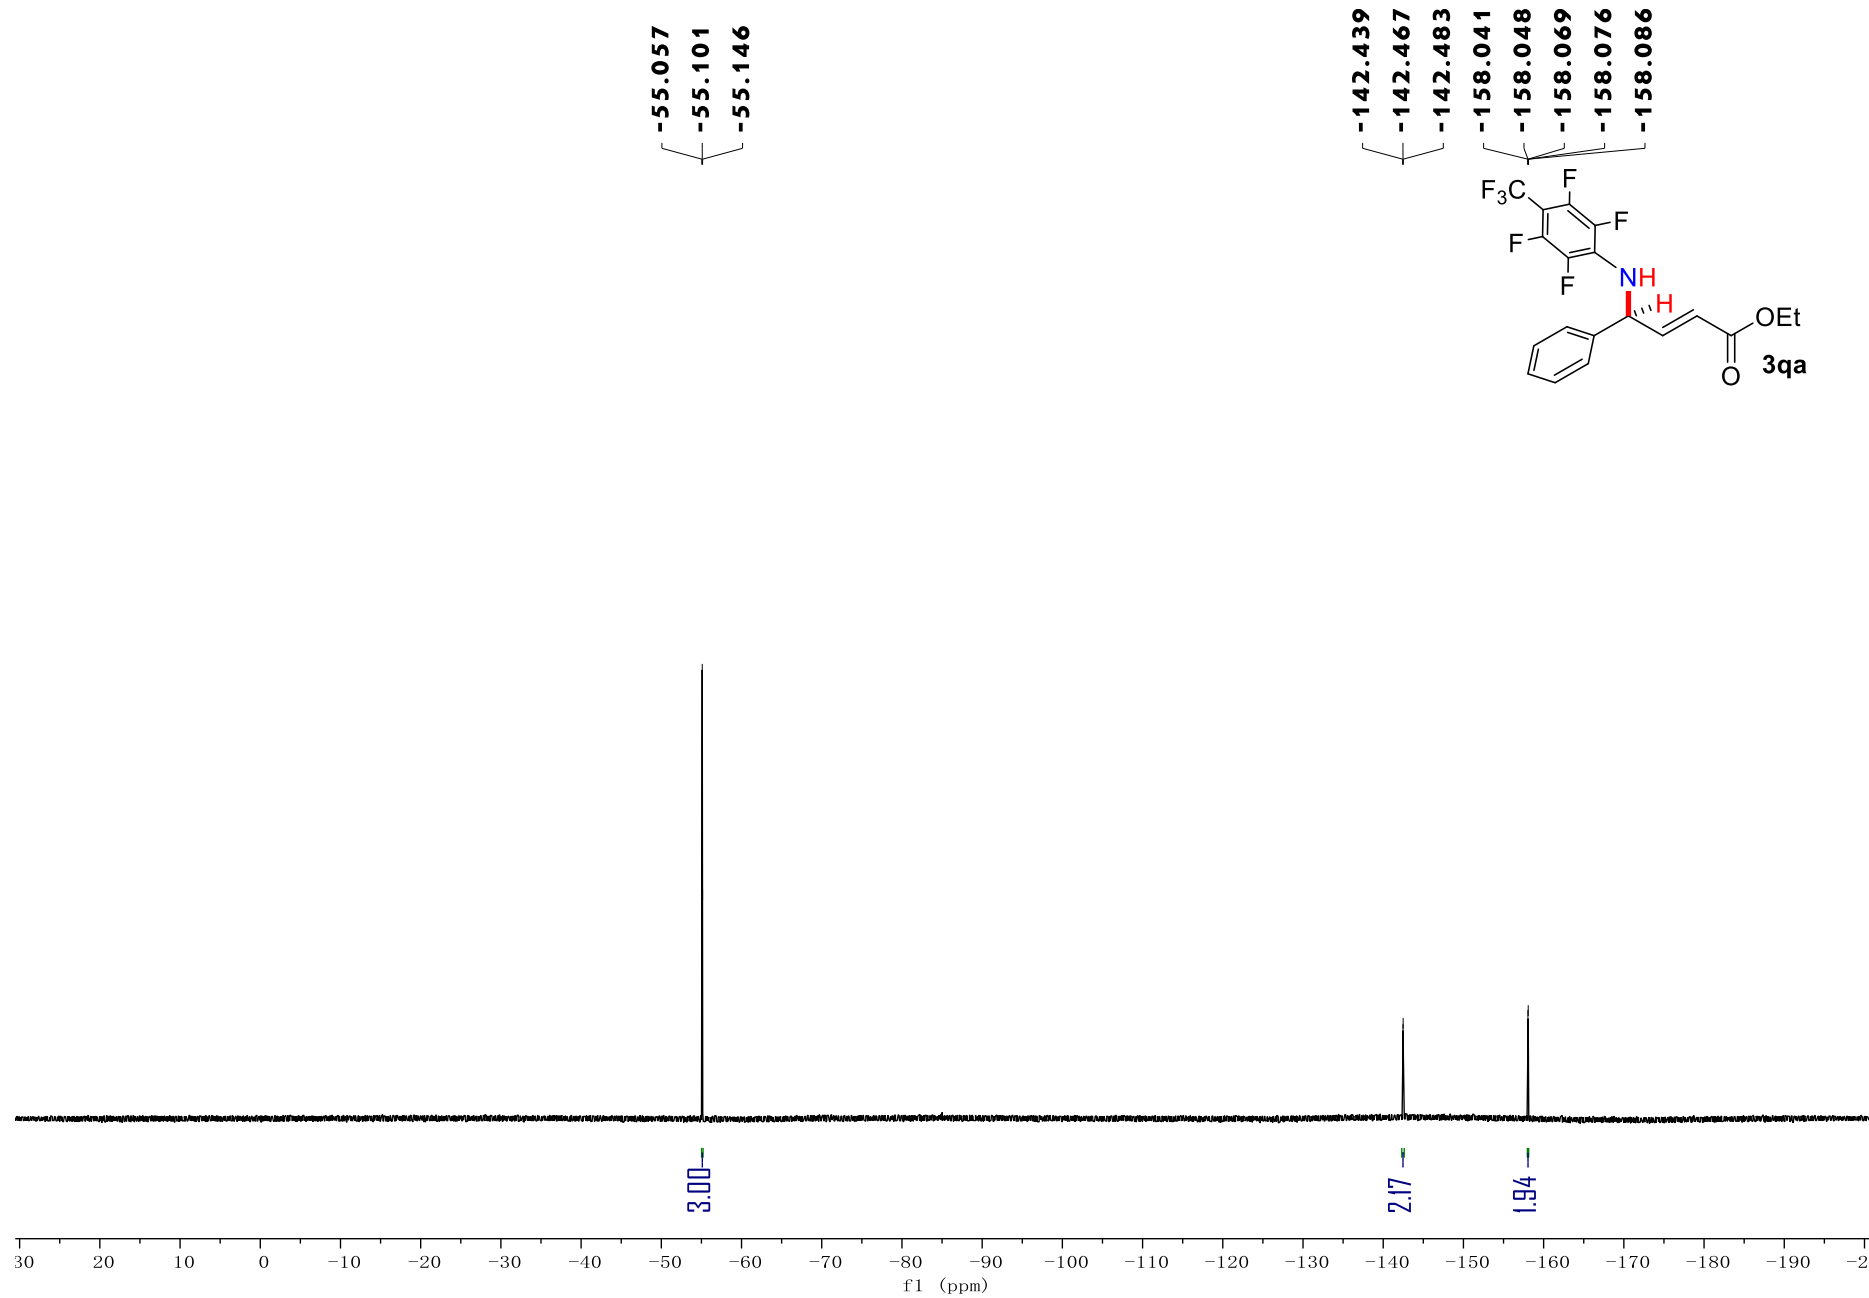

# HPLC

Sample Information  
Sample Name : P0X403-ODH-5%0.8mL  
Sample ID : P0X403-ODH-5%0.8mL  
Data File : P0X403-ODH-5%0.8mL.lcd  
Method File : XXW-5%.0.8.mL.lcm

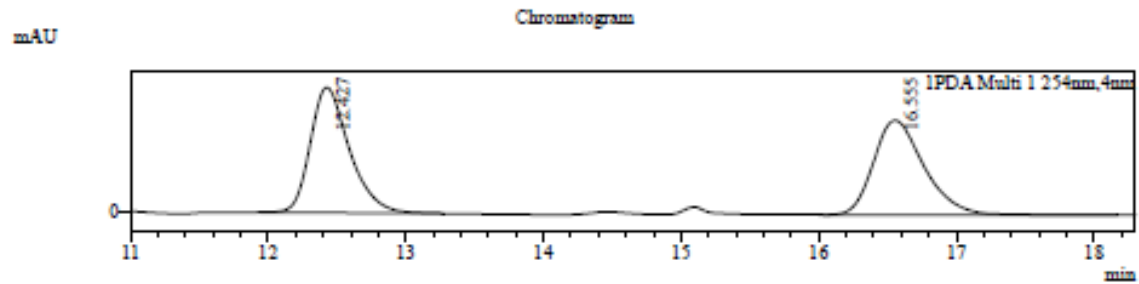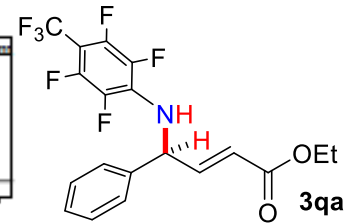

UV Spectrum  
Retention time = 12.427

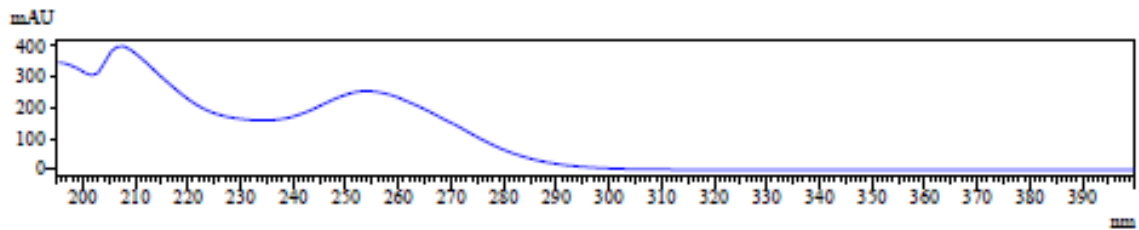

UV Spectrum  
Retention time = 16.555

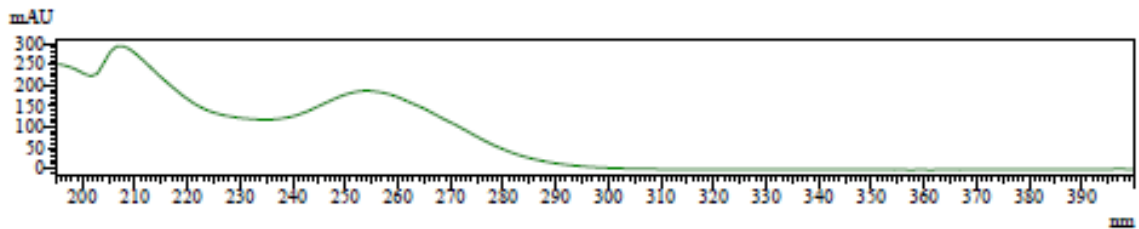

Peak Table

PDA Ch1 254nm

| Peak# | Ret. Time | Area    | Area%   |
|-------|-----------|---------|---------|
| 1     | 12.427    | 4973148 | 50.583  |
| 2     | 16.555    | 4858545 | 49.417  |
| Total |           | 9831693 | 100.000 |

# HPLC

Sample Information  
 Sample Name : P0X413-ODH-5%0.8mL  
 Sample ID : P0X413-ODH-5%0.8mL  
 Data File : P0X413-ODH-5%0.8mL.lcd  
 Method File : P0X-5%.0.8.mL-15Min.lcm

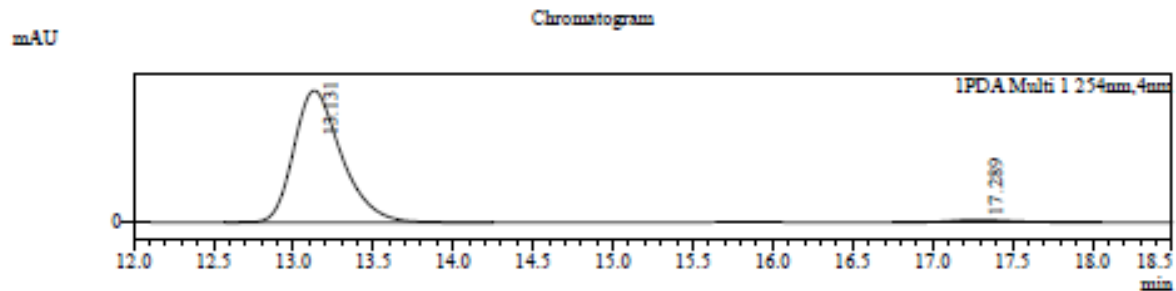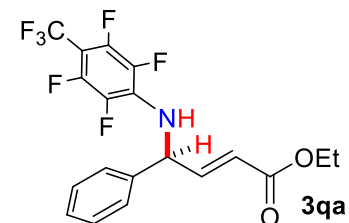

UV Spectrum  
 Retention time = 13.131

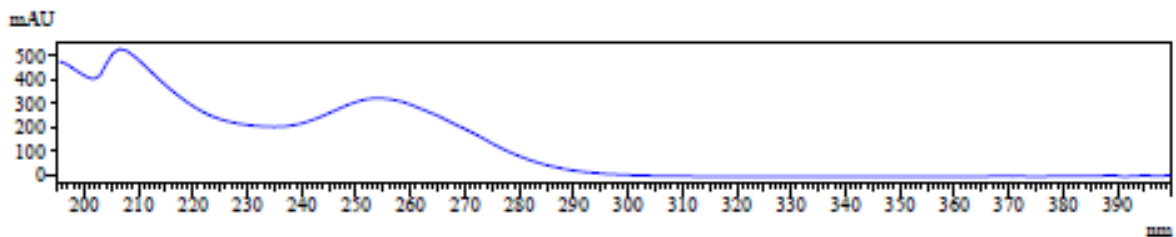

UV Spectrum  
 Retention time = 17.289

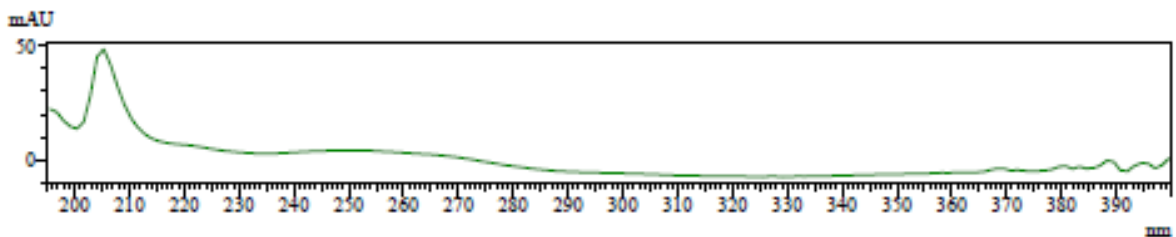

Peak Table

| Peak# | Ret. Time | Area    | Area%   |
|-------|-----------|---------|---------|
| 1     | 13.131    | 6677753 | 97.205  |
| 2     | 17.289    | 191990  | 2.795   |
| Total |           | 6869744 | 100.000 |

# <sup>1</sup>H NMR

7.304  
7.296  
7.290  
7.281  
7.109  
7.100  
7.095  
7.090  
7.080  
7.074  
7.064  
5.999  
5.996  
5.972  
5.970  
5.612  
5.603  
5.597  
5.588  
4.457  
4.442  
4.234  
4.231  
4.228  
4.221  
4.219  
4.210  
4.208  
4.197  
4.196

1.309  
1.298  
1.286

5.999  
5.996  
5.972  
5.970  
5.612  
5.603  
5.597  
5.588

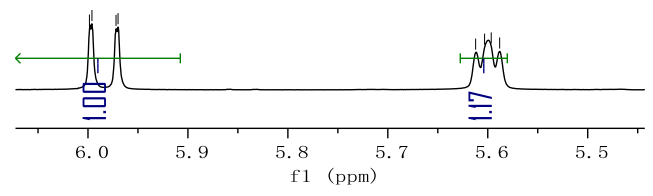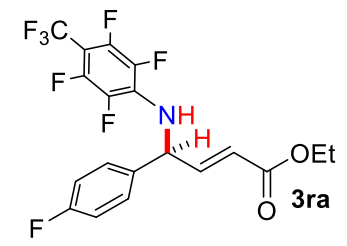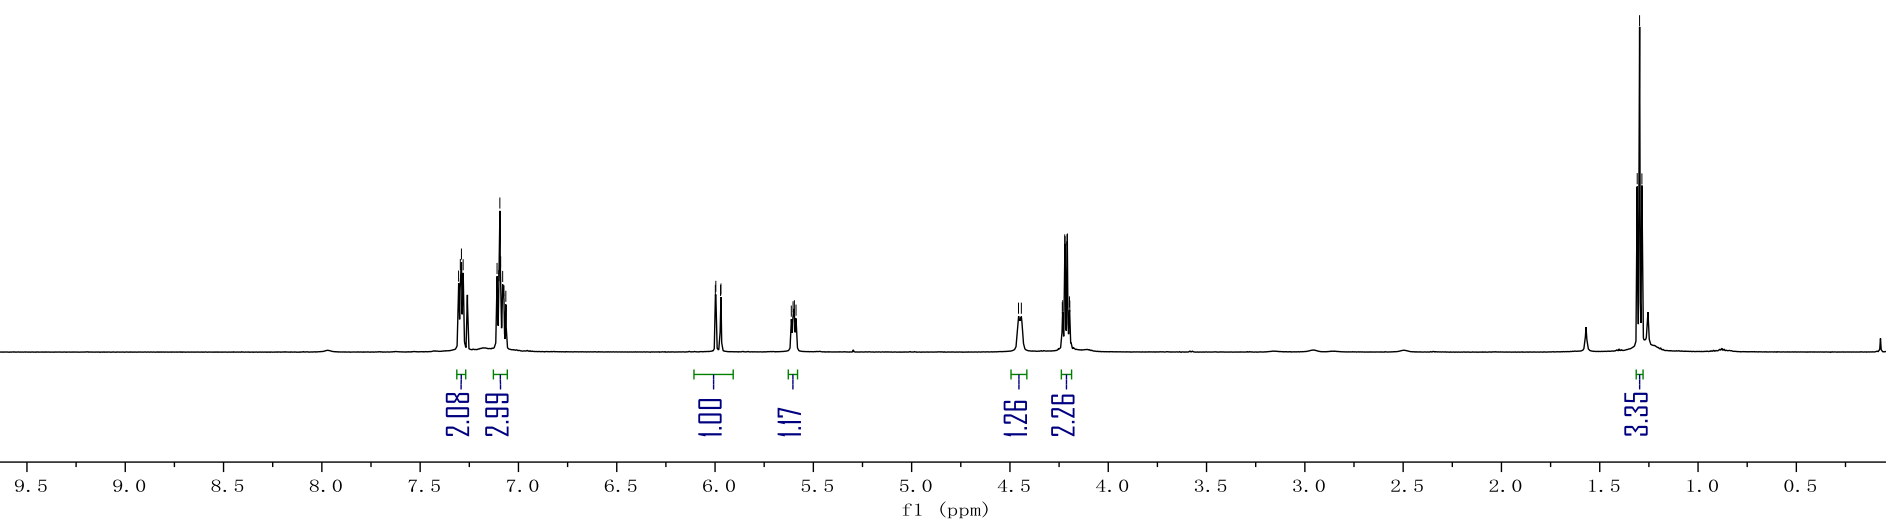

<sup>13</sup>C NMR

165.529  
163.513  
161.865  
145.709  
145.653  
145.608  
145.585  
143.964  
137.624  
137.516  
136.025  
135.996  
134.500  
134.477  
129.242  
129.192  
129.168  
128.747  
128.690  
123.946  
122.895  
122.156  
120.351  
118.544  
116.348  
116.203  
98.109  
98.021  
97.789  
97.700  
97.557  
77.125  
76.912  
76.701  
60.849  
58.754  
58.724  
58.693  
14.071

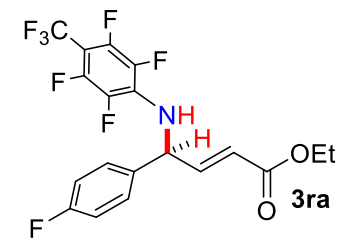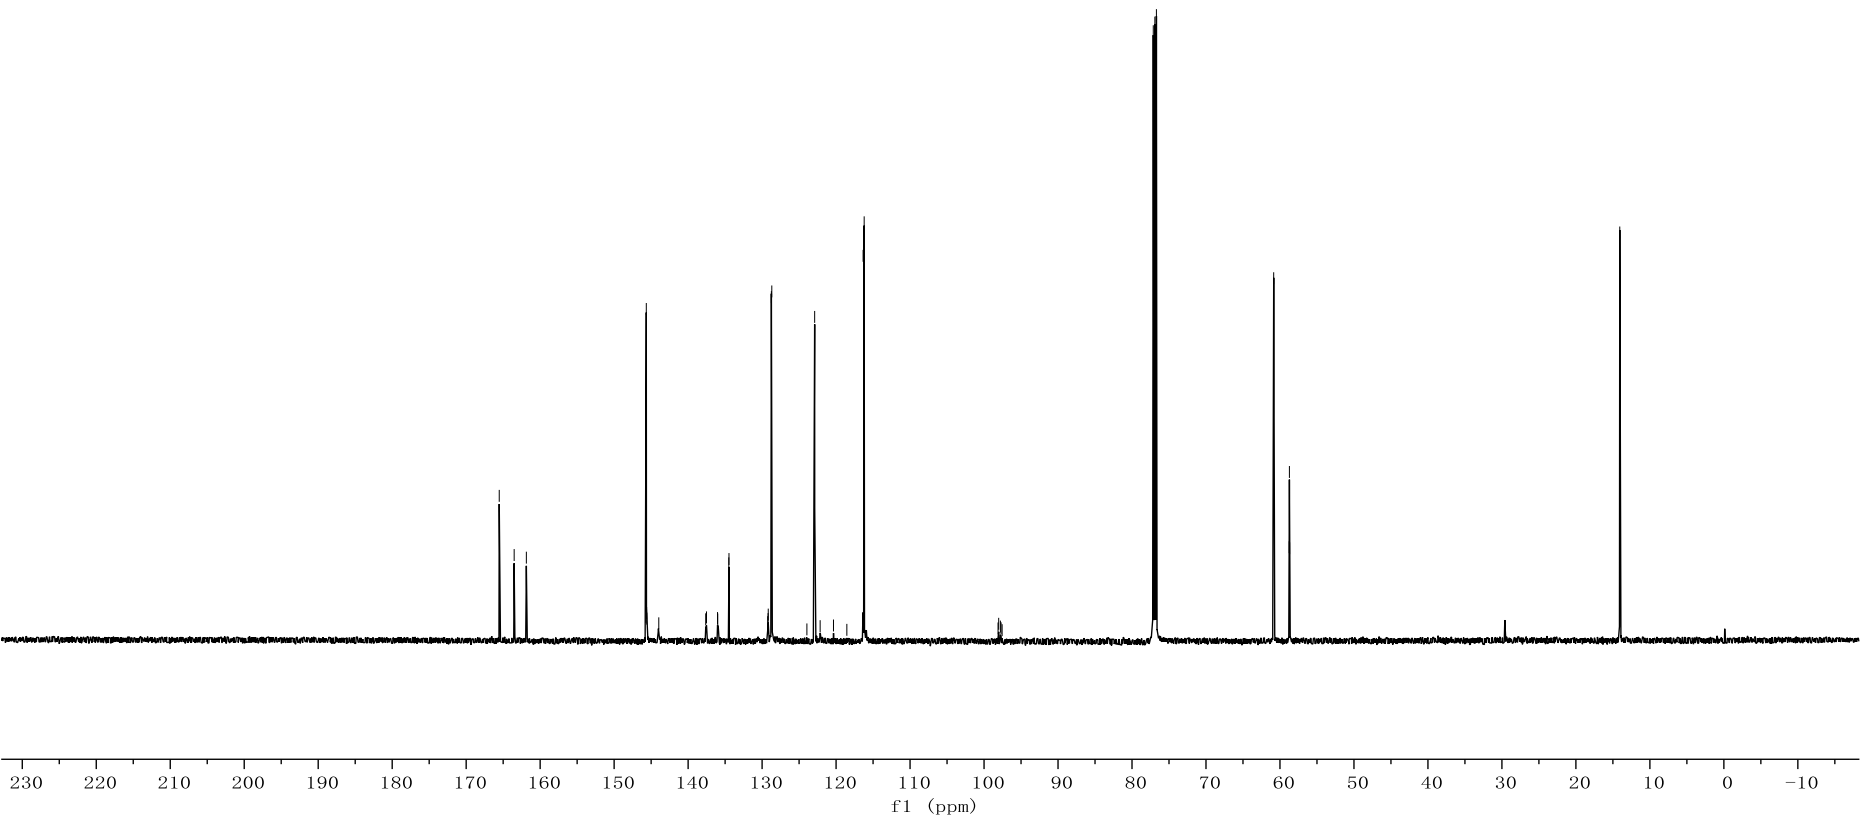

# <sup>19</sup>F NMR

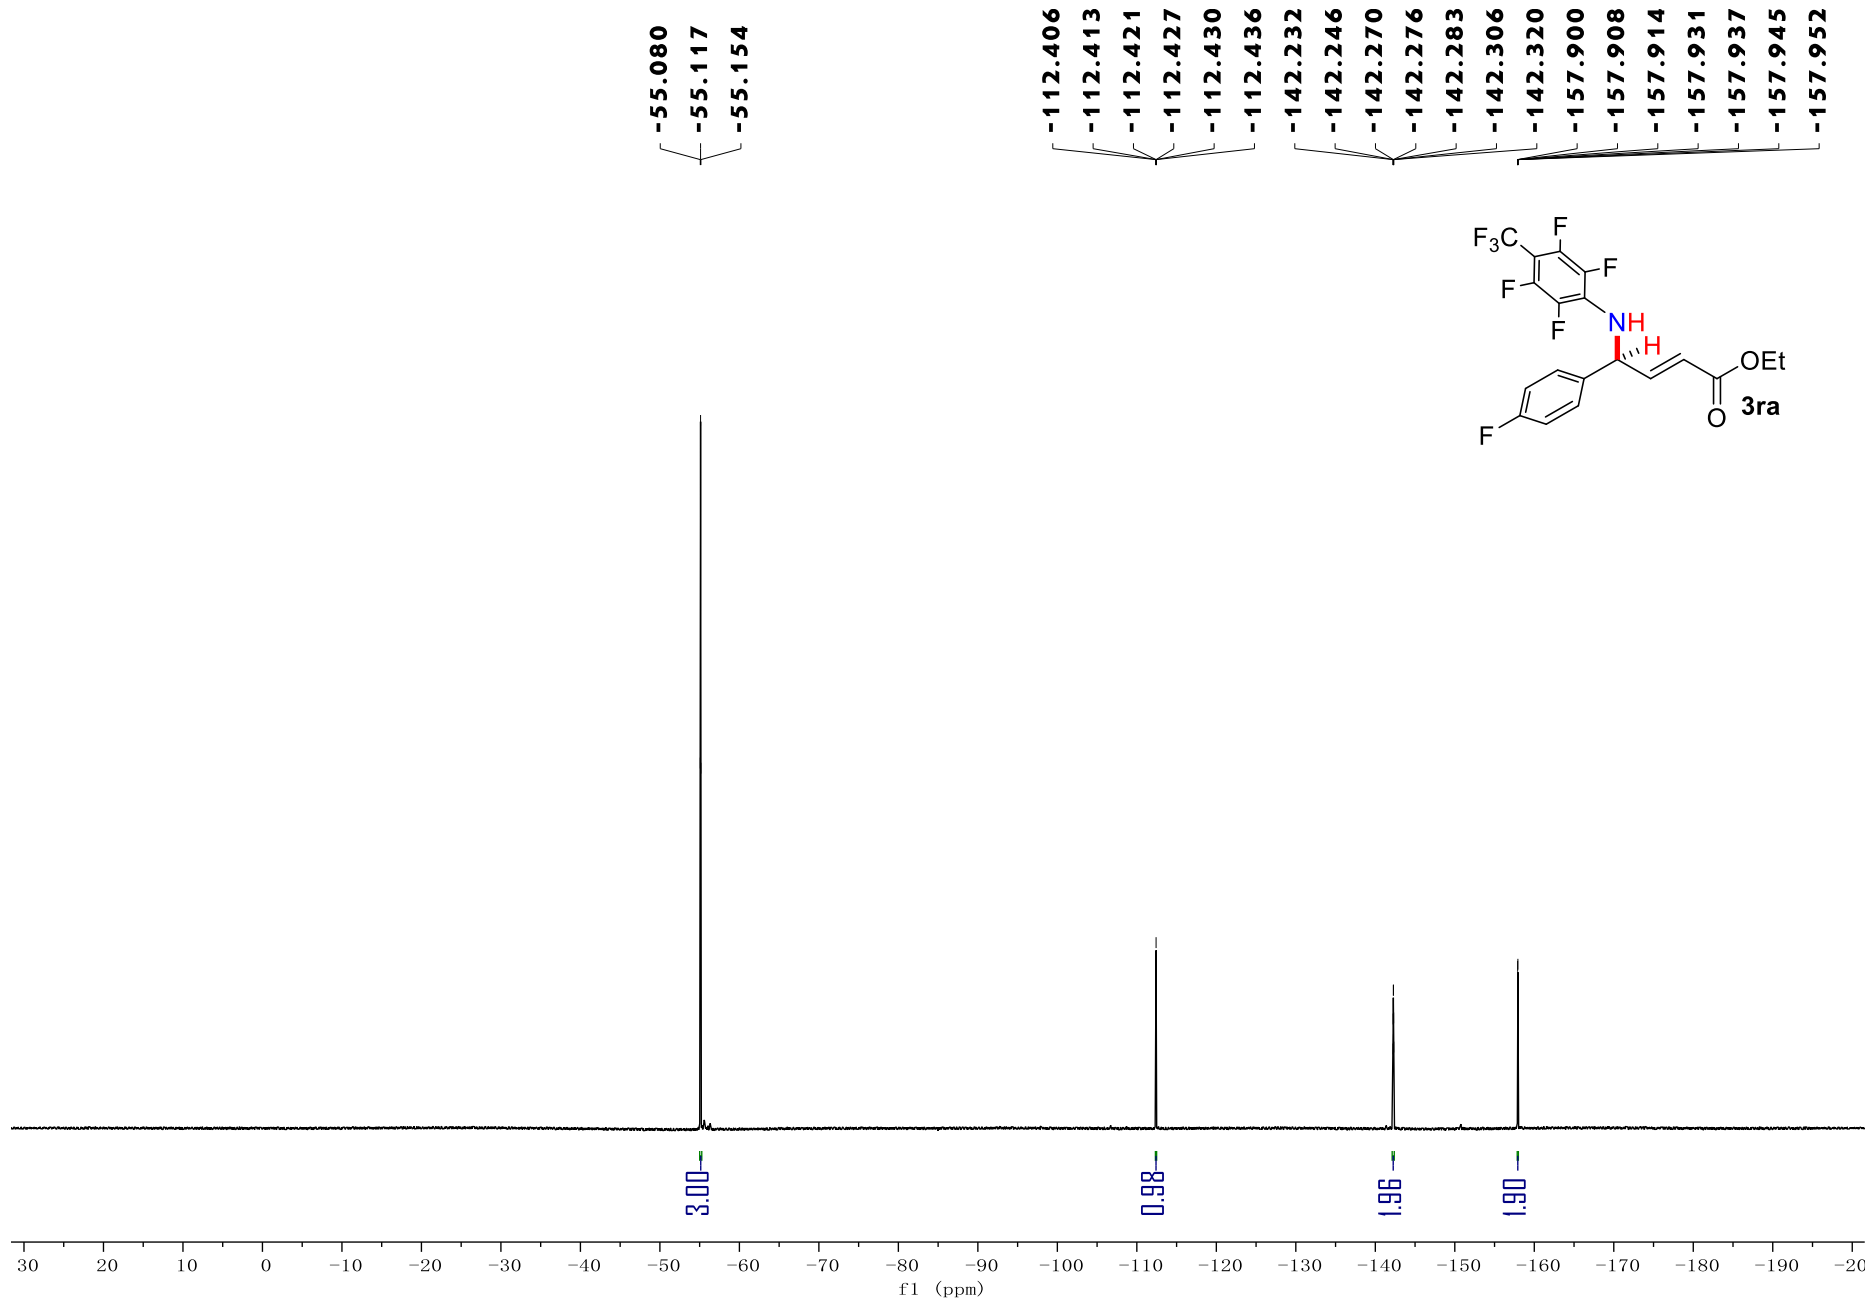

# HPLC

## Sample information

Sample Name : P0X-0575-ODH-5%0.8mL  
Sample ID : P0X-0575-ODH-5%0.8mL  
Data File : P0X-0575-ODH-5%0.8mL.lcd  
Method File : XXW-5%.0.8.mL.lcm

## Chromatogram

mAU

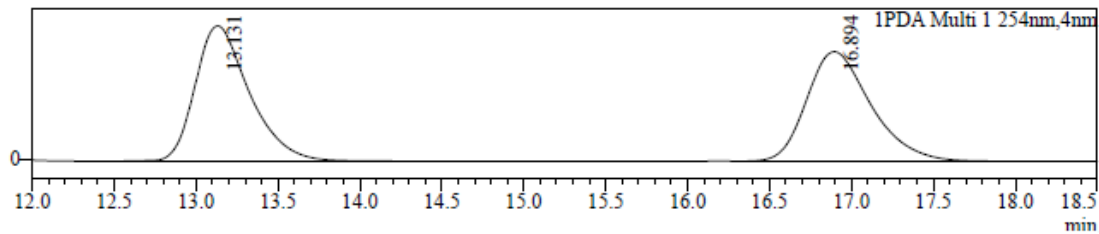

UV Spectrum

Retention time = 13.131

mAU

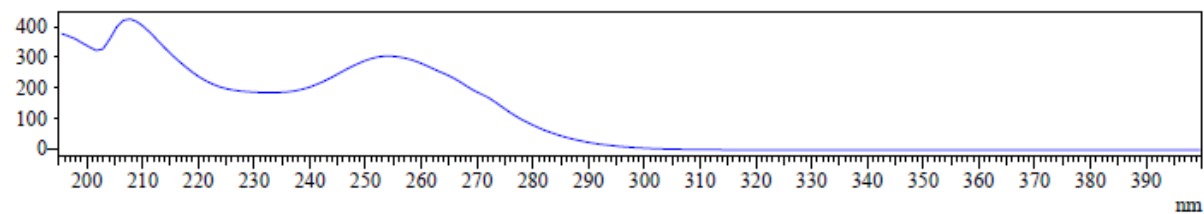

UV Spectrum

Retention time = 16.894

mAU

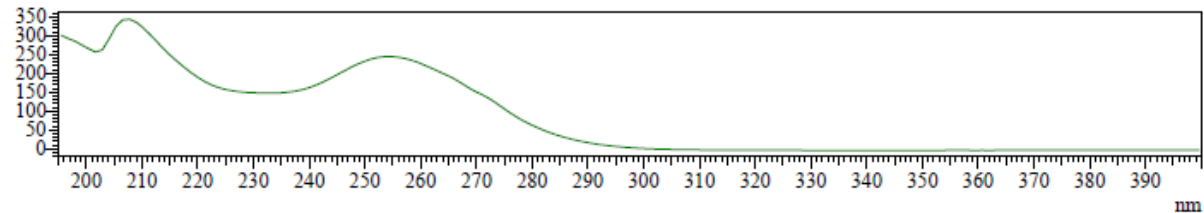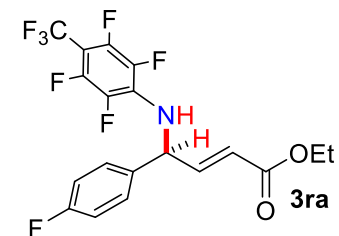

## Peak Table

PDA Ch1 254nm

| Peak# | Ret. Time | Area     | Area%   |
|-------|-----------|----------|---------|
| 1     | 13.131    | 7006663  | 51.058  |
| 2     | 16.894    | 6716174  | 48.942  |
| Total |           | 13722837 | 100.000 |



# HPLC

## Sample Information

Sample Name : P0X-0576-ODH-5%0.8mL  
Sample ID : P0X-0576-ODH-5%0.8mL  
Data File : P0X-0576-ODH-5%0.8mL.lcd  
Method File : XXW-5%0.8.mL.lcm

## Chromatogram

mAU

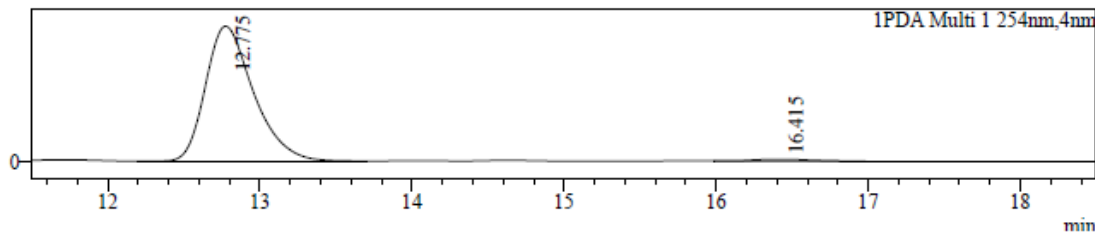

UV Spectrum

Retention time = 12.775

mAU

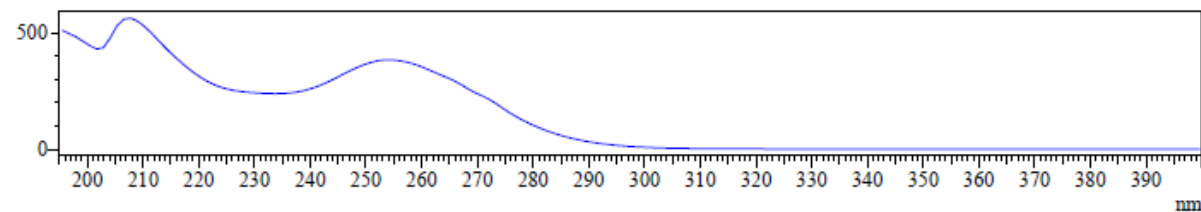

UV Spectrum

Retention time = 16.415

mAU

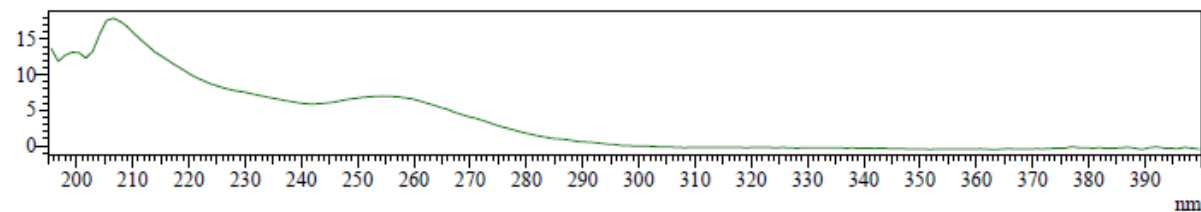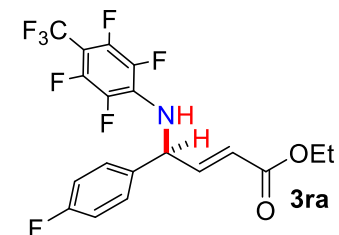

## Peak Table

PDA Ch1 254nm

| Peak# | Ret. Time | Area    | Area%   |
|-------|-----------|---------|---------|
| 1     | 12.775    | 8307811 | 98.288  |
| 2     | 16.415    | 144733  | 1.712   |
| Total |           | 8452543 | 100.000 |

# <sup>1</sup>H NMR

7.259  
7.232  
7.216  
7.118  
7.107  
7.087  
7.076  
6.925  
6.909  
5.998  
5.995  
5.967  
5.964  
5.571  
5.556  
5.542  
4.446  
4.439  
4.430  
4.421  
4.229  
4.215  
4.201  
4.186  
3.813

1.307  
1.294  
1.279

5.998  
5.995  
5.967  
5.964  
5.571  
5.556  
5.542

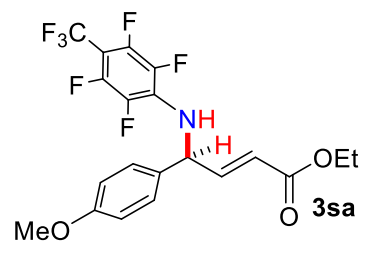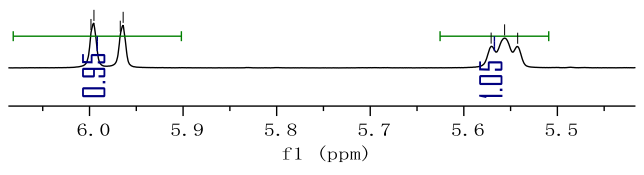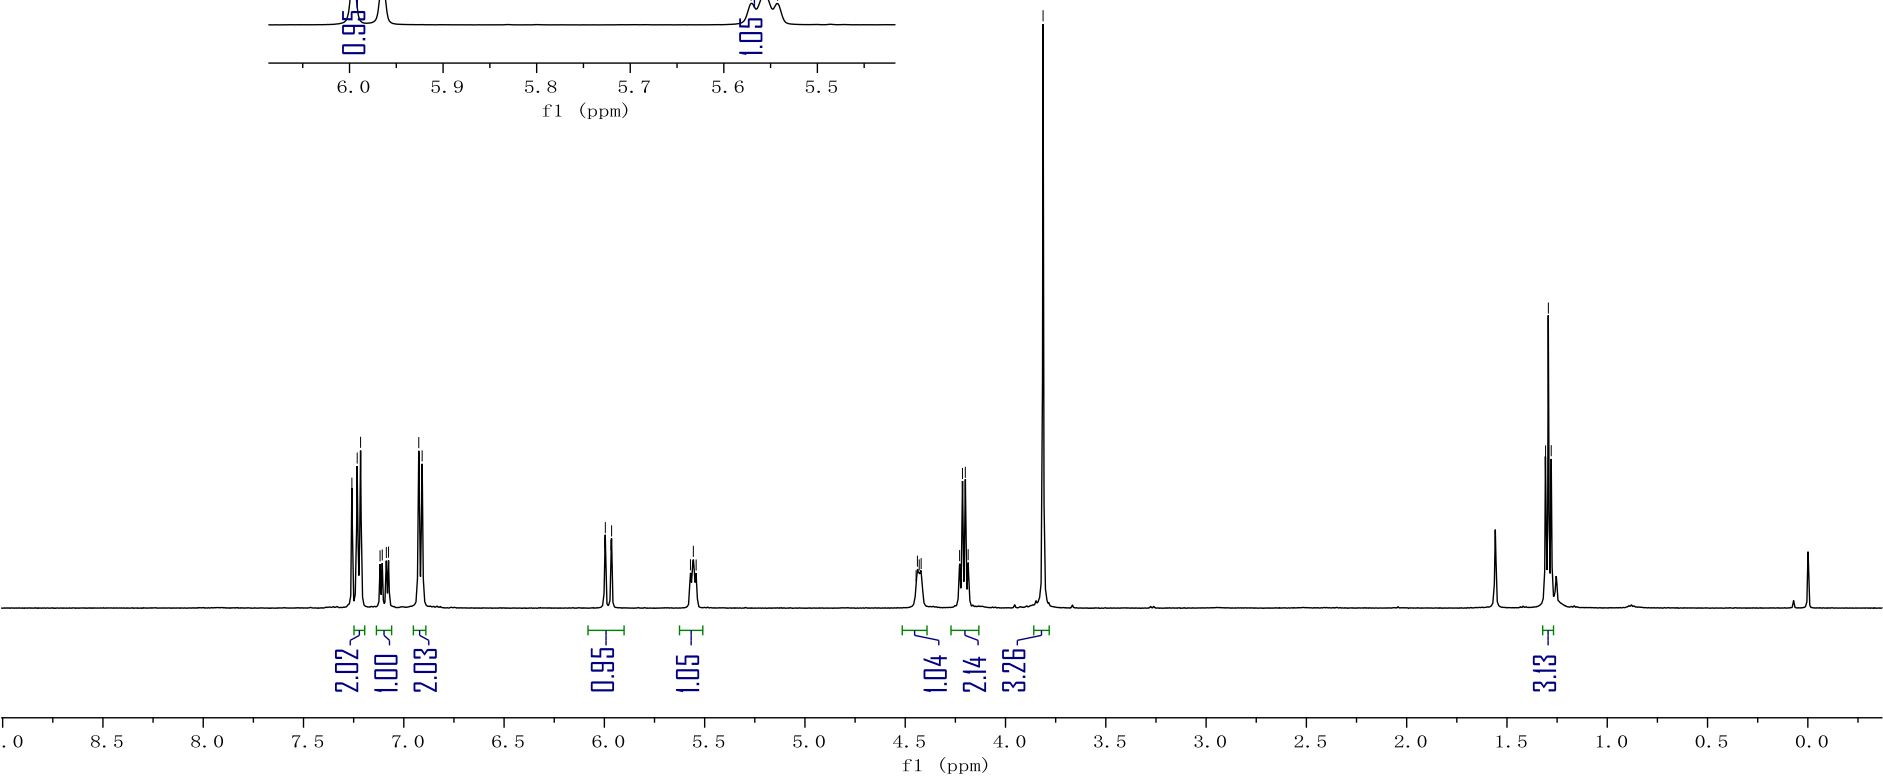

# <sup>13</sup>C NMR

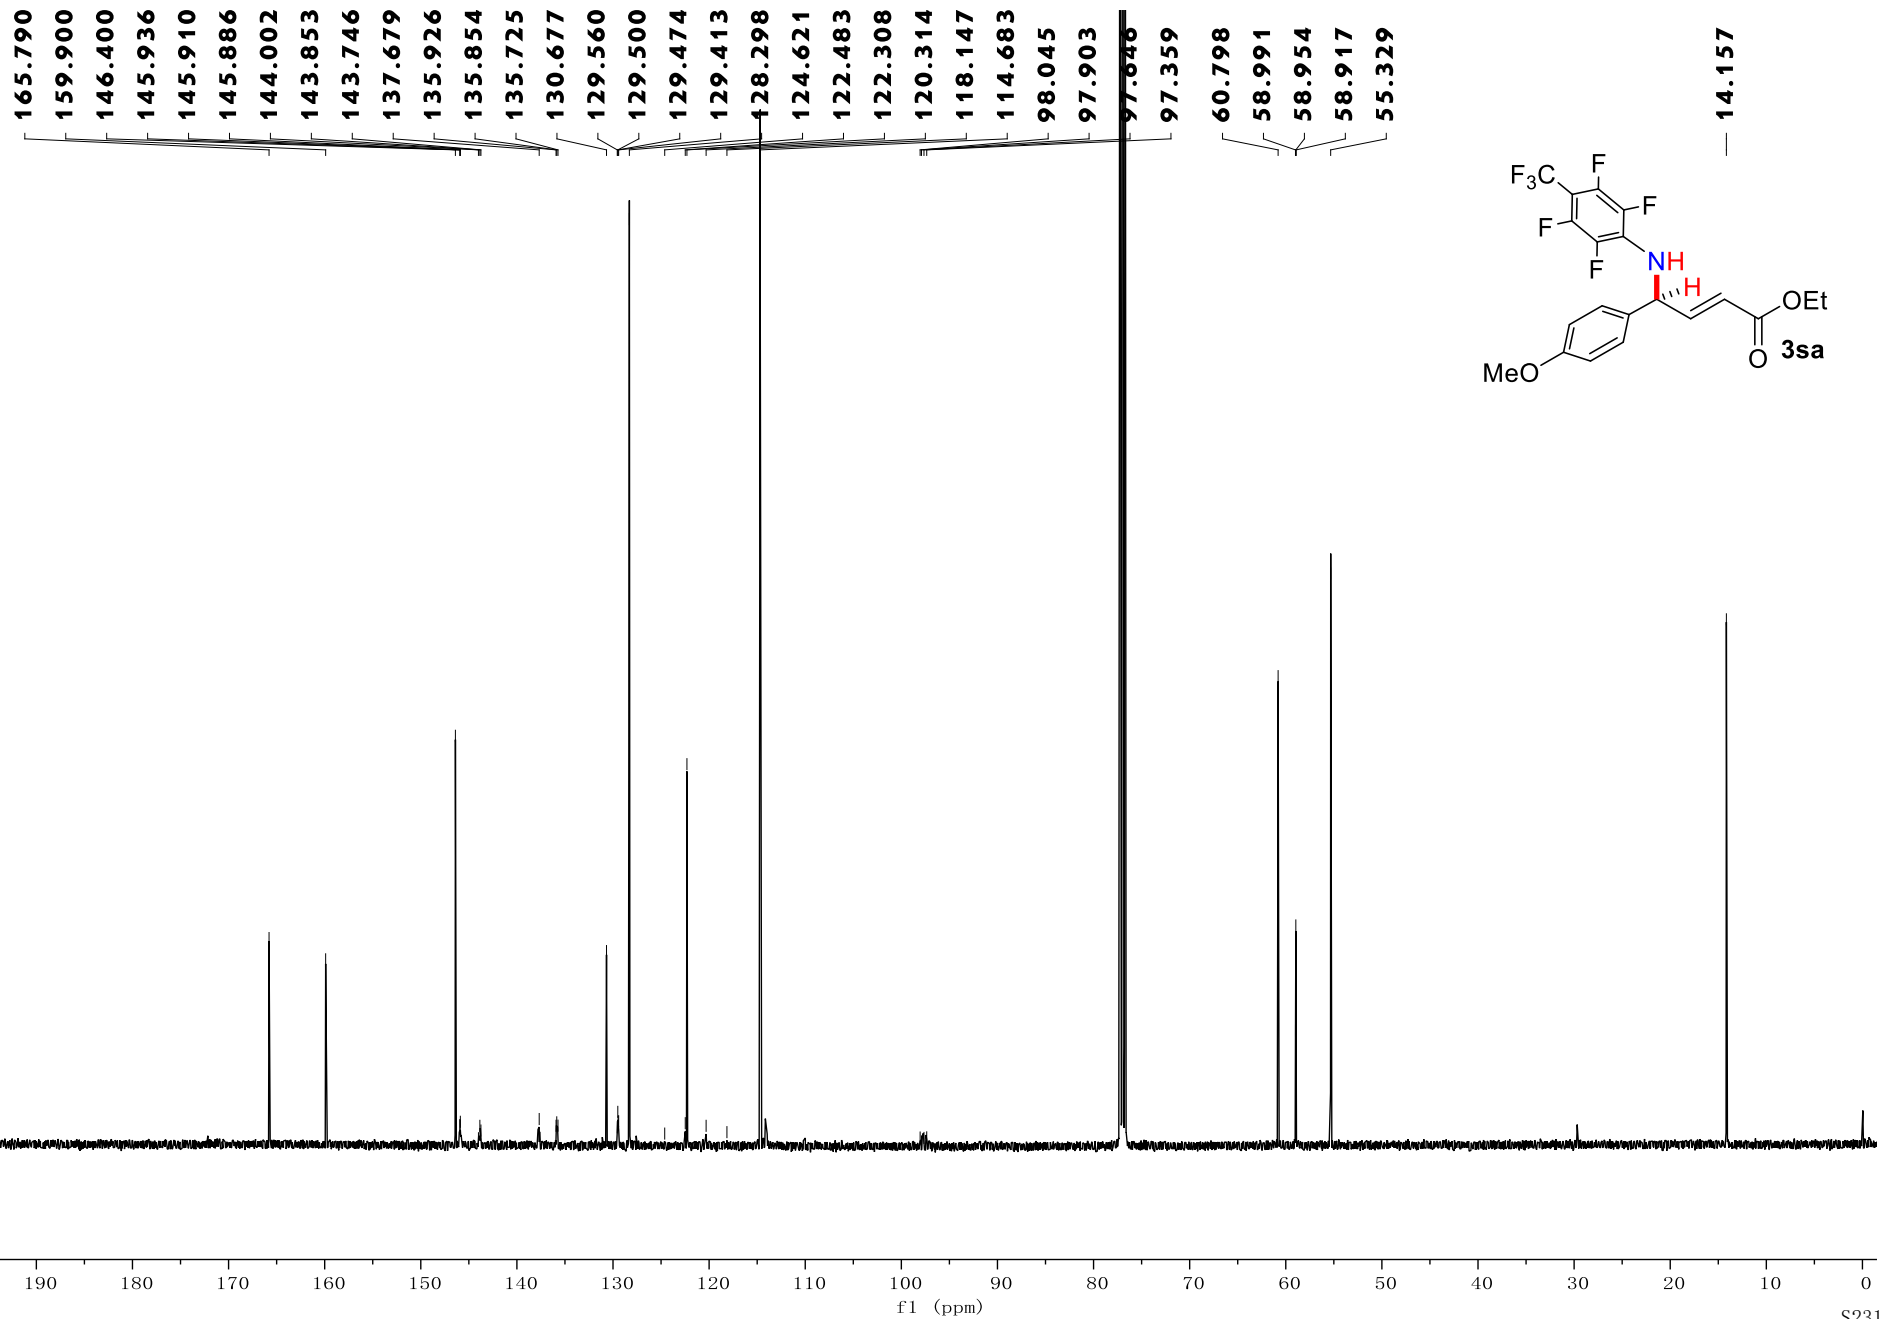

# <sup>19</sup>F NMR

-55.039  
-55.084  
-55.128

-142.503  
-142.517  
-142.532  
-142.547  
-142.562  
-142.576  
-142.591  
-142.607  
-142.620  
-142.634  
-142.665  
-142.681  
-158.086  
-158.094  
-158.104  
-158.111  
-158.131  
-158.138  
-158.148  
-158.156

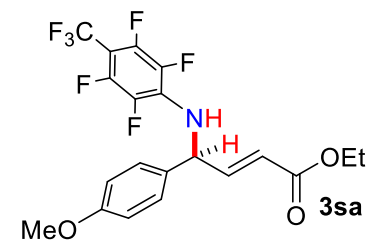

3.00

2.03

1.97

# HPLC

Sample Information  
 Sample Name : P0X-0548-3-ODH-5%0.8mL  
 Sample ID : P0X-0548-3-ODH-5%0.8mL  
 Data File : P0X-0548-3-ODH-5%0.8mL.lcd  
 Method File : XXW-5%0.8.mL.lcm

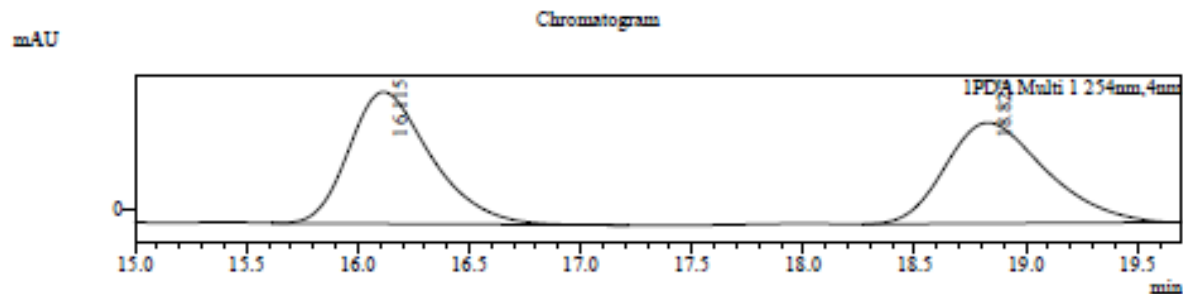

UV Spectrum  
 Retention time = 16.115

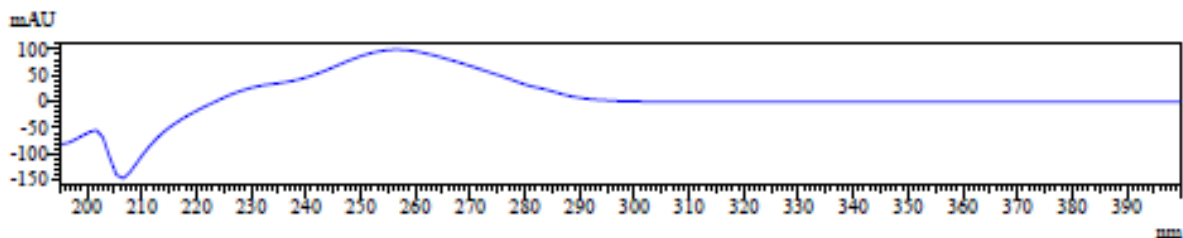

UV Spectrum  
 Retention time = 18.827

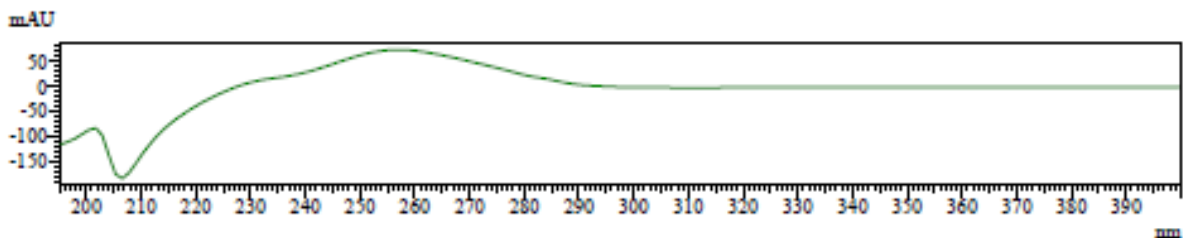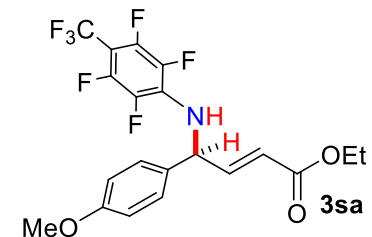

Peak Table

PDA Ch1 254nm

| Peak# | Ret. Time | Area    | Area%   |
|-------|-----------|---------|---------|
| 1     | 16.115    | 2740801 | 51.715  |
| 2     | 18.827    | 2559026 | 48.285  |
| Total |           | 5299827 | 100.000 |

# HPLC

Sample Information  
 Sample Name : P0X-0582-ODH-5%0.8mL  
 Sample ID : P0X-0582-ODH-5%0.8mL  
 Data File : P0X-0582-ODH-5%0.8mL.lcd  
 Method File : P0X-5.0%-0.8ml.lcm

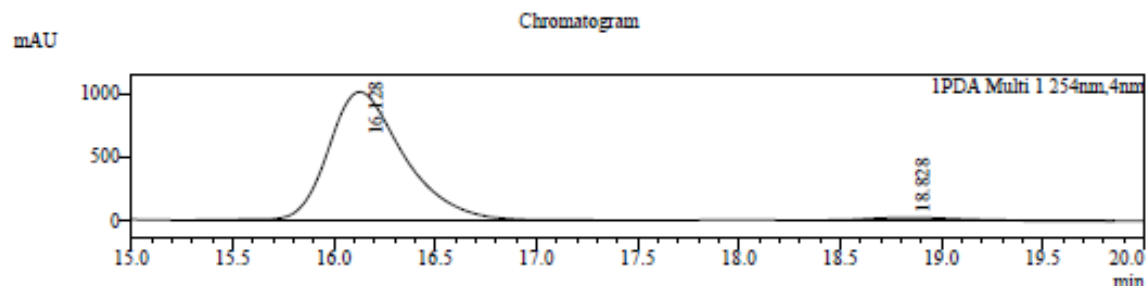

UV Spectrum  
 Retention time = 16.128

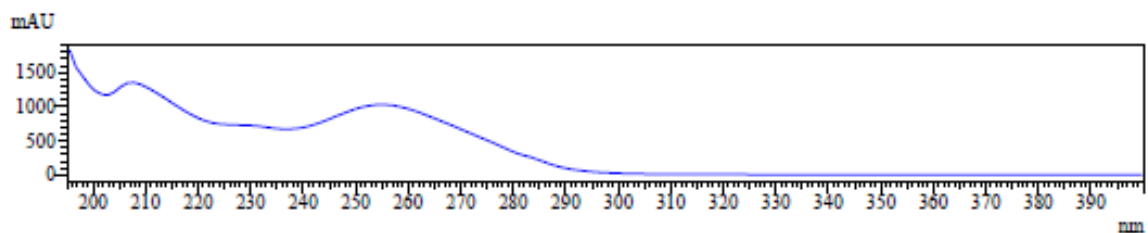

UV Spectrum  
 Retention time = 18.828

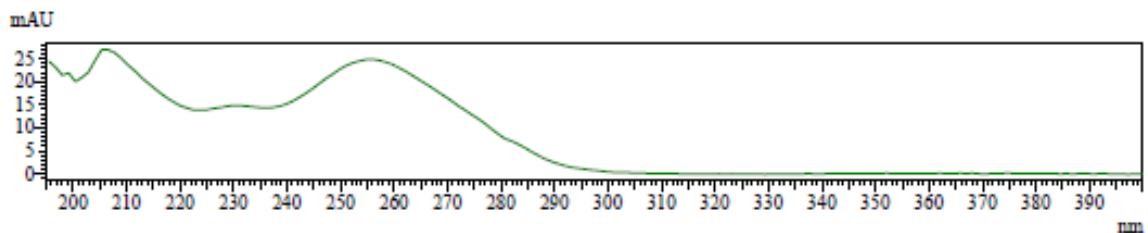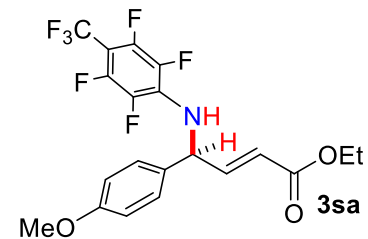

Peak Table

| Peak# | Ret. Time | Area     | Area%   |
|-------|-----------|----------|---------|
| 1     | 16.128    | 26349173 | 97.394  |
| 2     | 18.828    | 704902   | 2.606   |
| Total |           | 27054075 | 100.000 |

# <sup>1</sup>H NMR

7.335  
7.322  
7.308  
7.107  
7.098  
7.081  
7.072  
6.892  
6.879  
6.830  
6.011  
5.985  
5.581  
5.572  
5.566  
5.557  
4.512  
4.496  
4.227  
4.216  
4.203  
4.191  
3.816

1.307  
1.295  
1.283

6.011  
5.985

5.581  
5.572  
5.566  
5.557

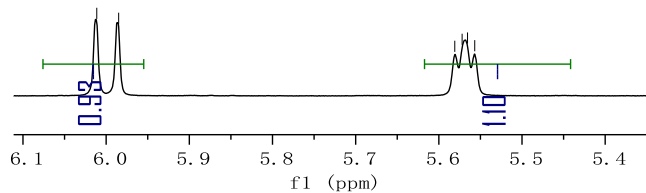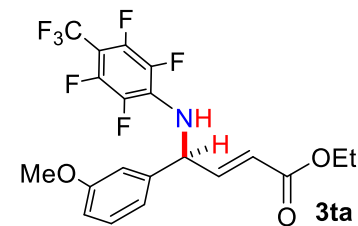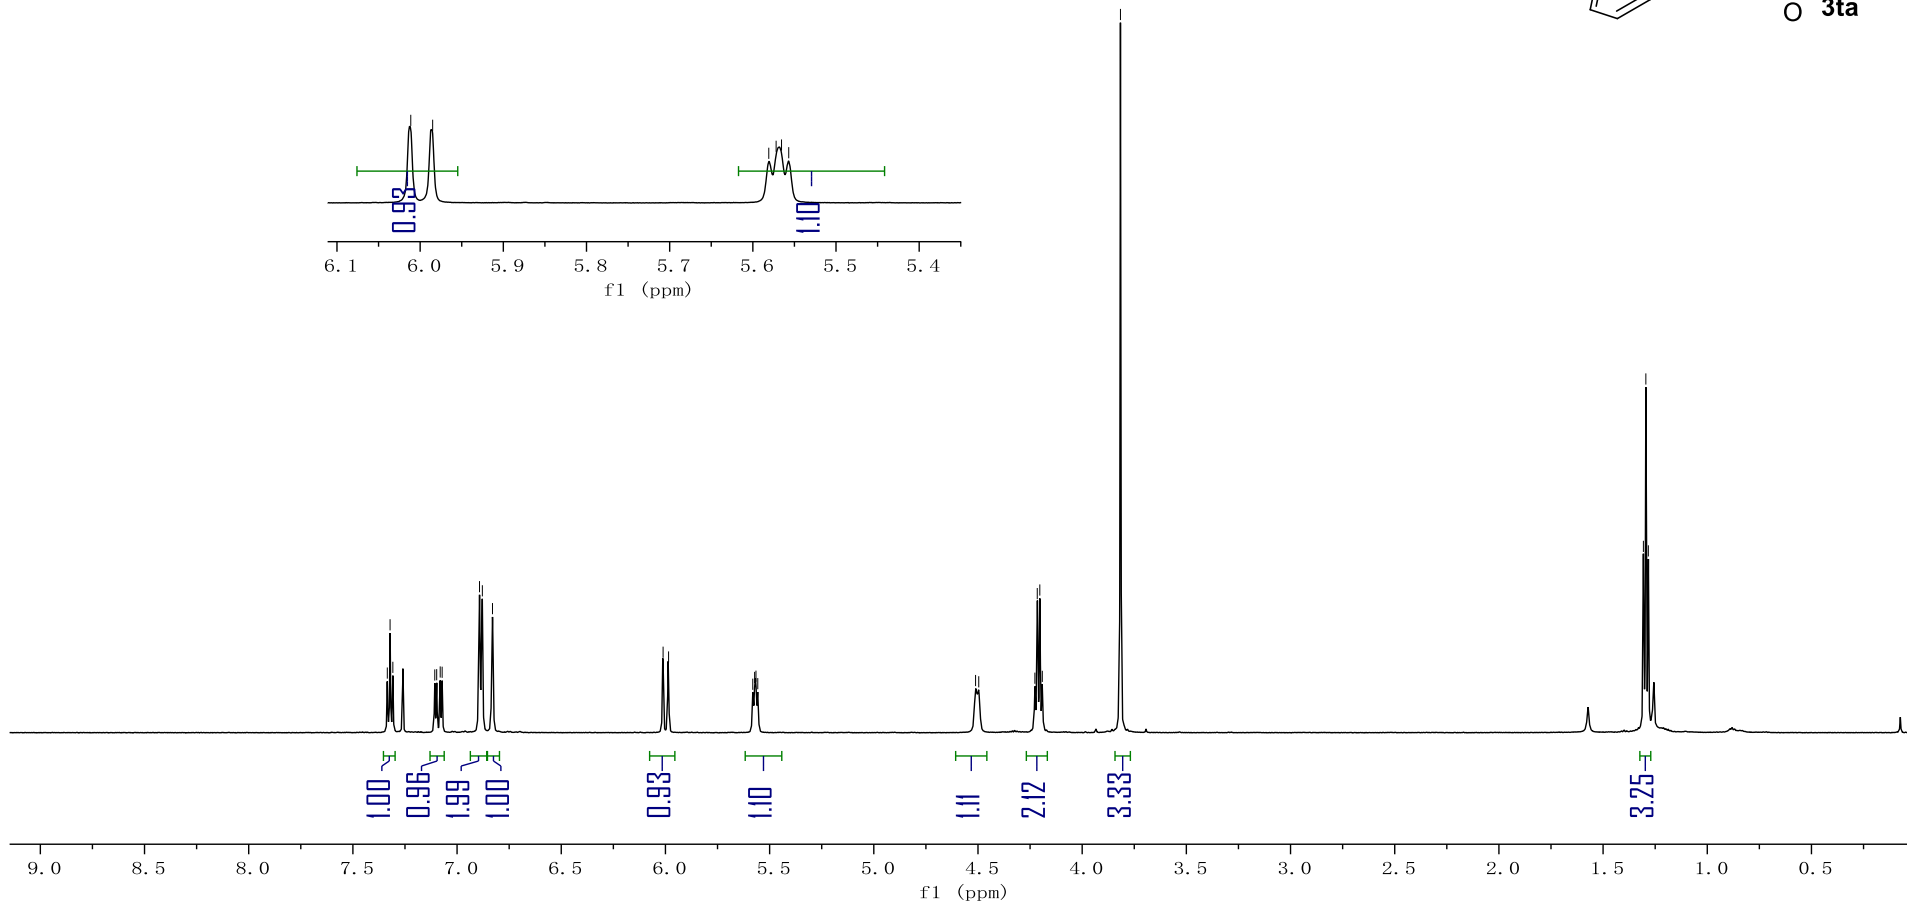

<sup>13</sup>C NMR

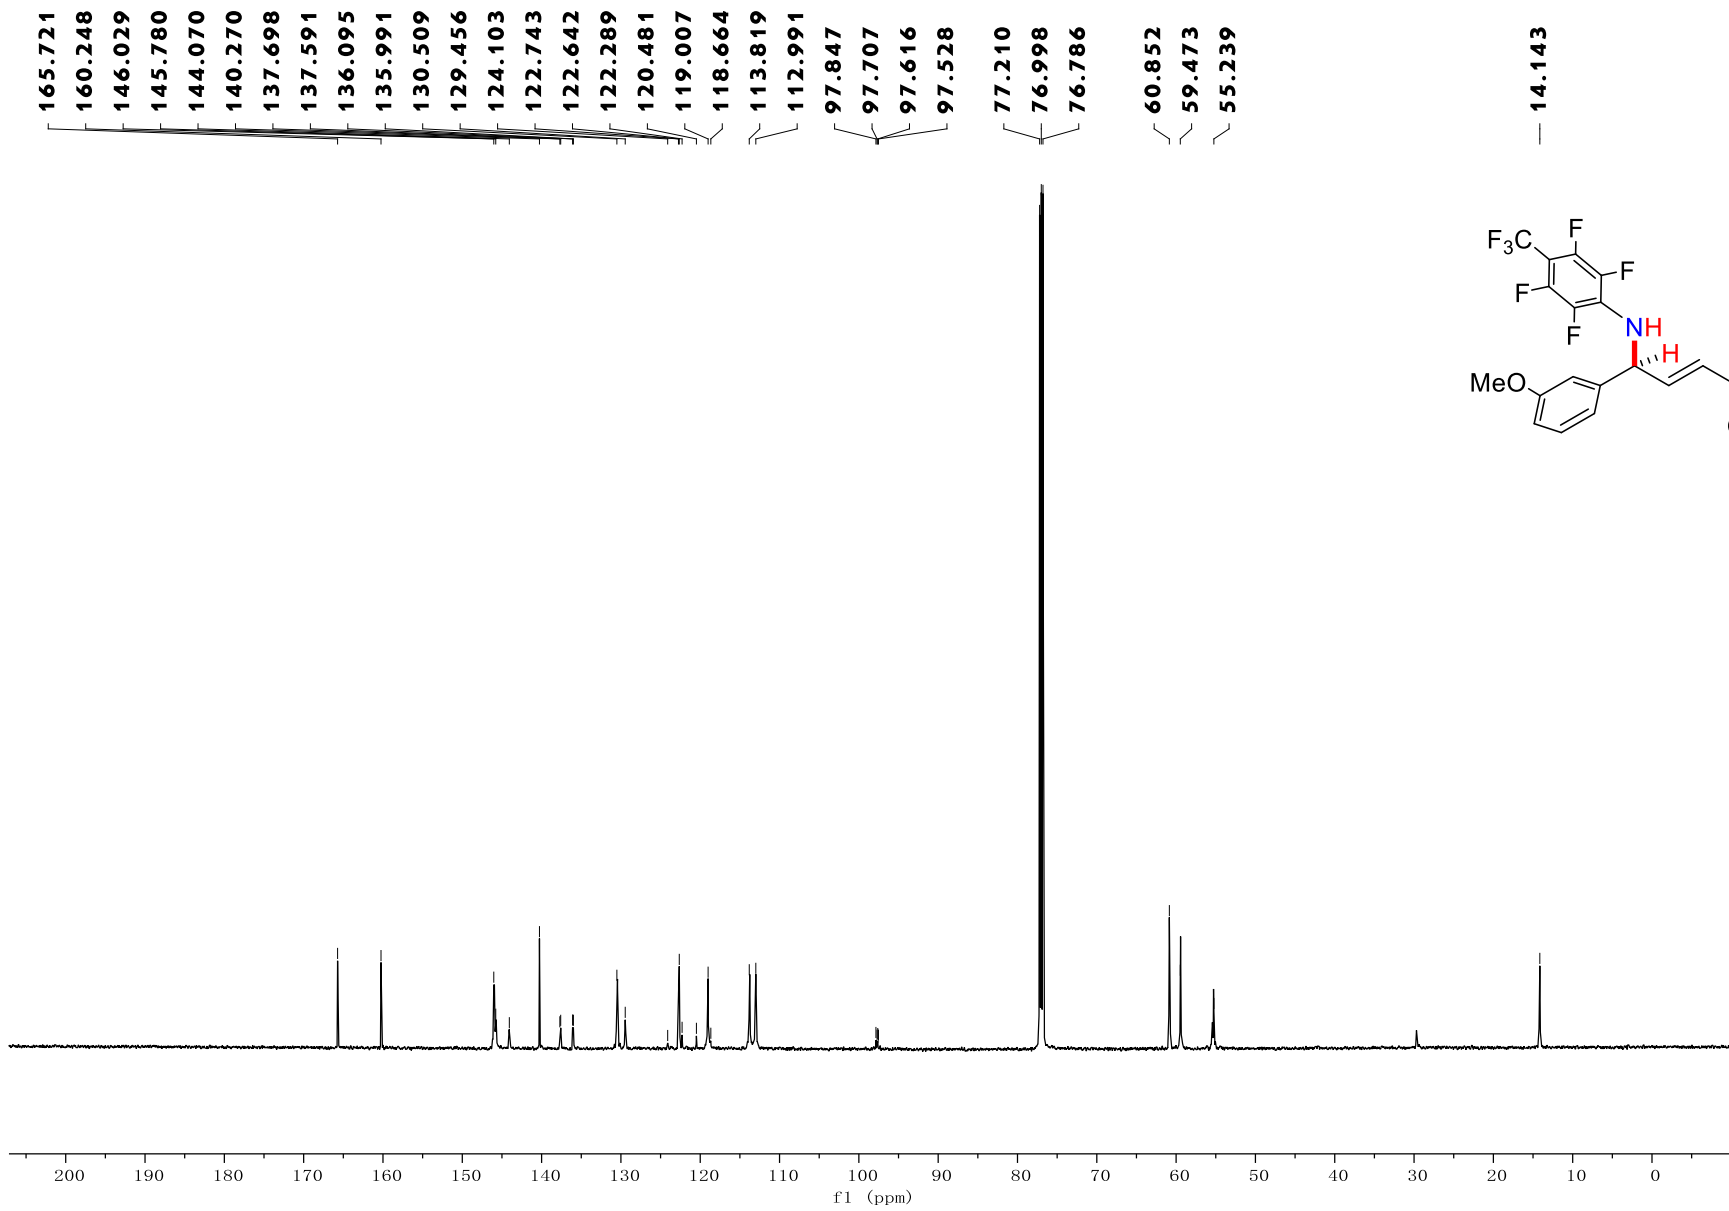



<sup>19</sup>F NMR

-55.080  
-55.117  
-55.154

-142.464  
-142.471  
-142.477  
-142.501  
-142.508  
-142.514  
-142.538  
-142.544  
-142.552  
-158.031  
-158.038  
-158.045  
-158.051  
-158.068  
-158.074  
-158.082  
-158.089

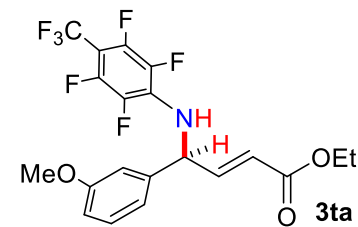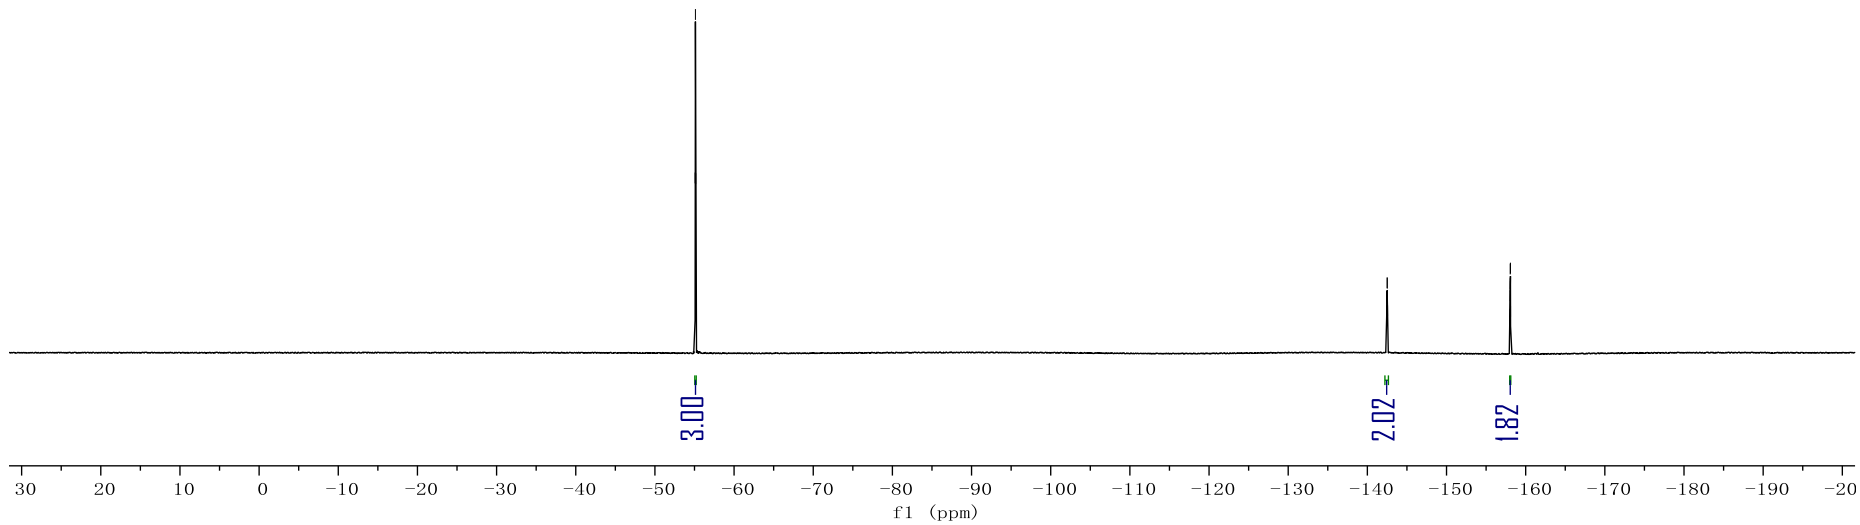

# HPLC

## Sample Information

Sample Name : POX-0731ODH-5%-0.8mL  
Sample ID : POX-0731ODH-5%-0.8mL  
Data File : POX-0731ODH-5%-0.8mL.lcd  
Method File : POX-5.0%-0.8ml.lcm

## Chromatogram

mAU

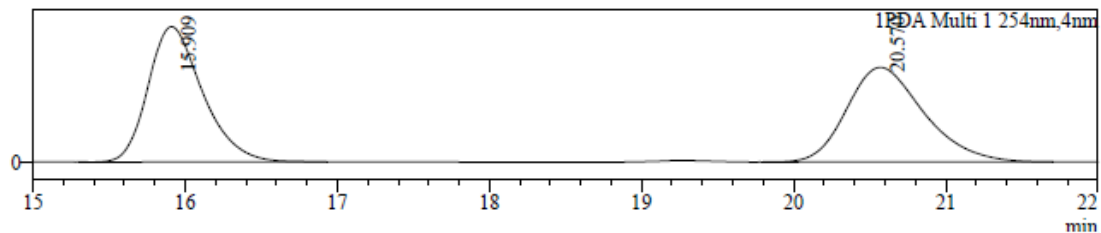

UV Spectrum  
Retention time = 15.909

mAU

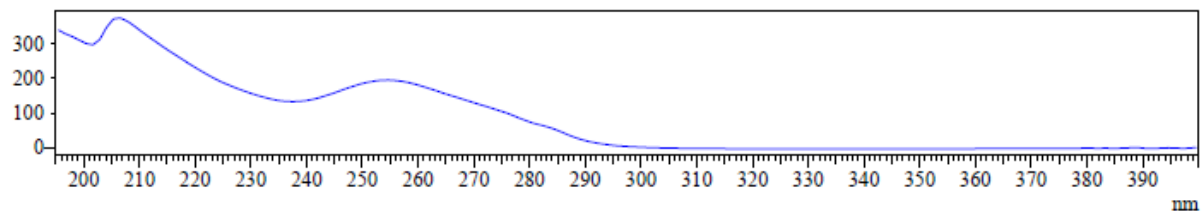

UV Spectrum  
Retention time = 20.570

mAU

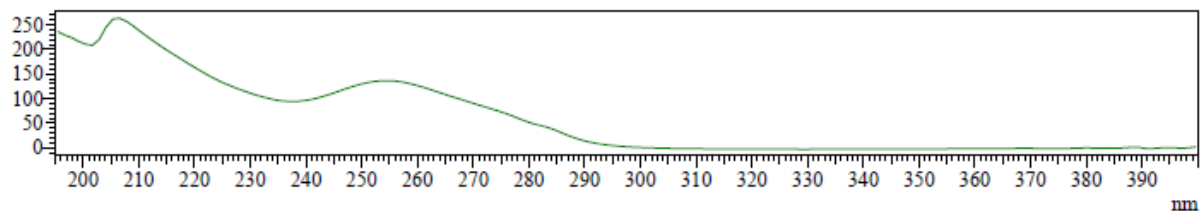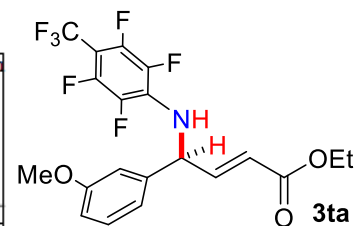

## Peak Table

PDA Ch1 254nm

| Peak# | Ret. Time | Area    | Area%   |
|-------|-----------|---------|---------|
| 1     | 15.909    | 4776937 | 50.343  |
| 2     | 20.570    | 4711898 | 49.657  |
| Total |           | 9488835 | 100.000 |

# HPLC

## Sample Information

Sample Name : P0X-0732-ODH-5%-0.8mL  
Sample ID : P0X-0732-ODH-5%-0.8mL  
Data File : P0X-0732-ODH-5%-0.8mL.lcd  
Method File : P0X-5.0%-0.8ml.lcm

## Chromatogram

mAU

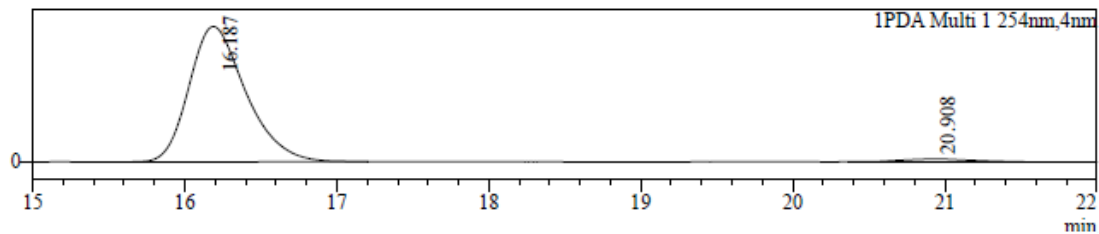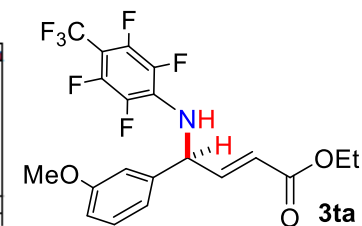

UV Spectrum

Retention time = 16.187

mAU

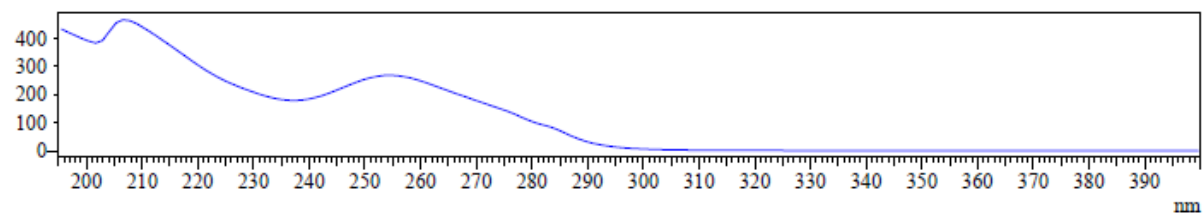

UV Spectrum

Retention time = 20.908

mAU

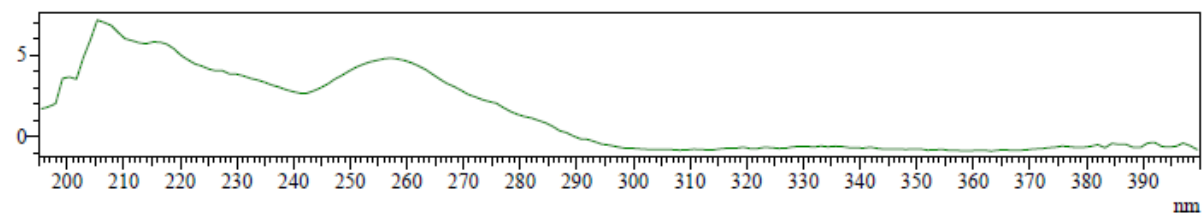

## Peak Table

PDA Ch1 254nm

| Peak# | Ret. Time | Area    | Area%   |
|-------|-----------|---------|---------|
| 1     | 16.187    | 6937205 | 97.368  |
| 2     | 20.908    | 187500  | 2.632   |
| Total |           | 7124705 | 100.000 |

# <sup>1</sup>H NMR

7.341  
7.328  
7.314  
7.196  
7.183  
7.170  
7.161  
7.144  
7.135  
6.976  
6.964  
6.948  
6.946  
6.932  
5.984  
5.957  
5.725  
5.716  
5.709  
5.700  
5.298  
5.283  
4.211  
4.199  
4.187  
4.175  
3.878

5.984  
5.957  
5.725  
5.716  
5.709  
5.700  
5.298  
5.283

1.296  
1.284  
1.272

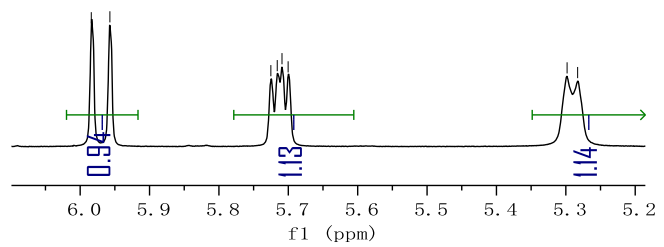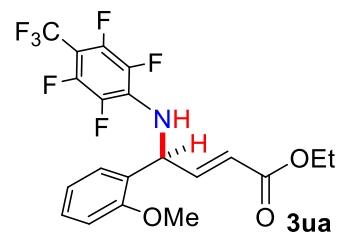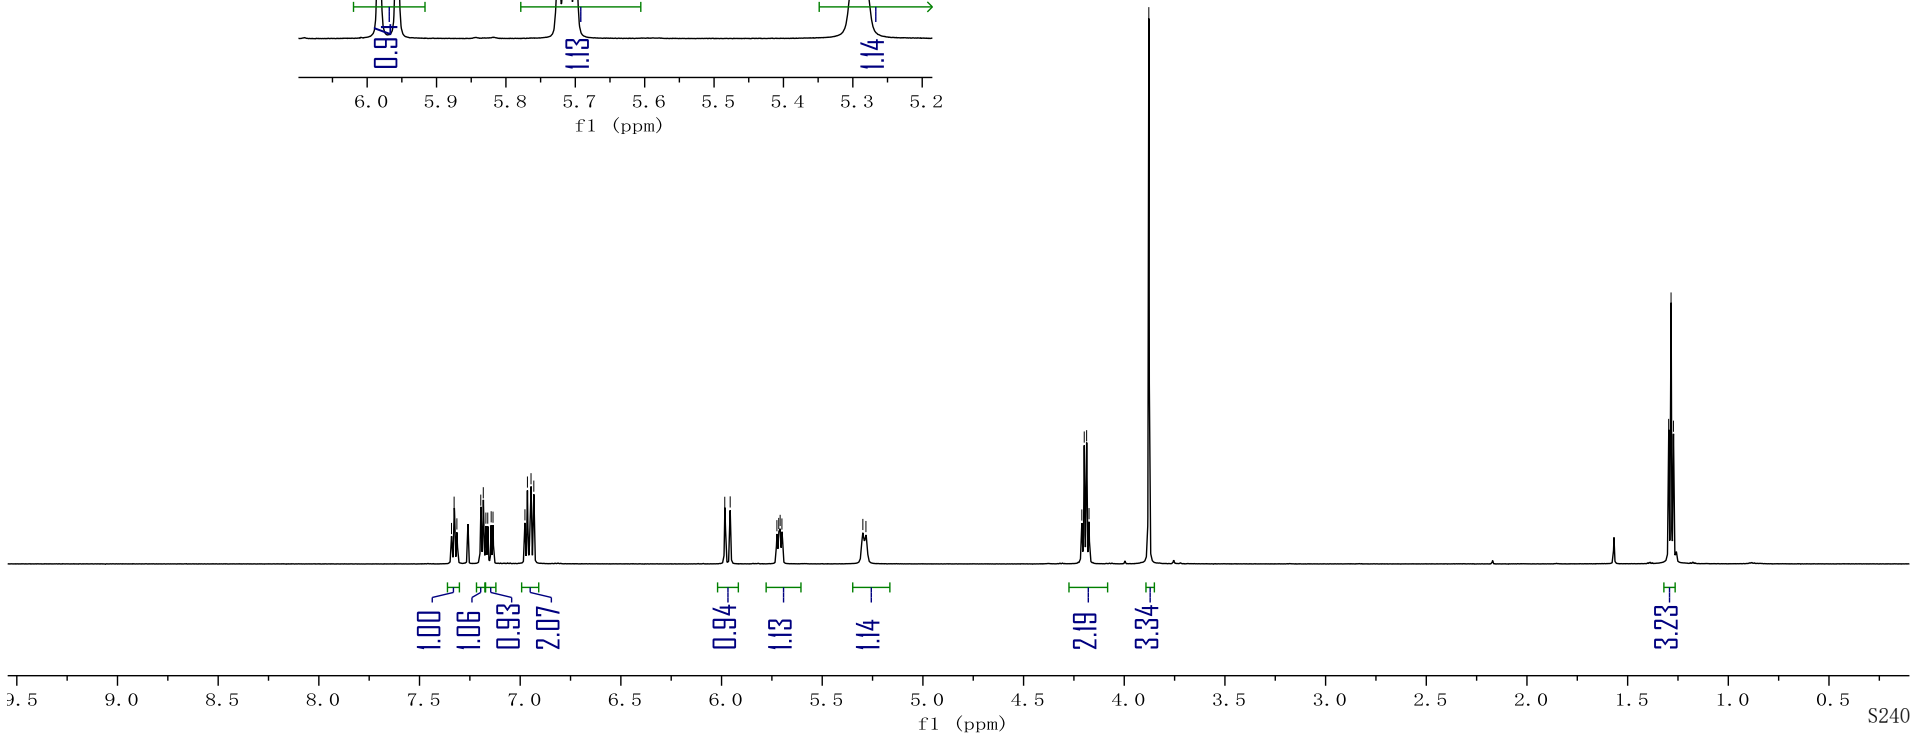

# <sup>13</sup>C NMR

166.138  
156.963  
146.383  
145.710  
144.074  
143.979  
137.954  
137.922  
137.886  
137.849  
137.816  
137.782  
136.357  
136.321  
136.292  
136.254  
136.224  
130.283  
130.257  
130.233  
130.209  
130.187  
130.164  
130.077  
128.796  
126.542  
122.414  
121.855  
121.249  
120.608  
118.798  
111.484  
97.453  
97.364  
97.221  
97.131  
77.243  
77.031  
76.818  
60.697  
57.719  
57.685  
57.651  
55.505  
14.208

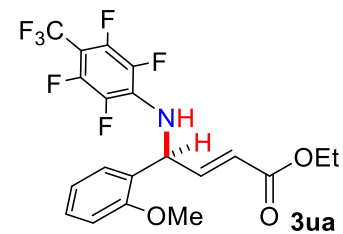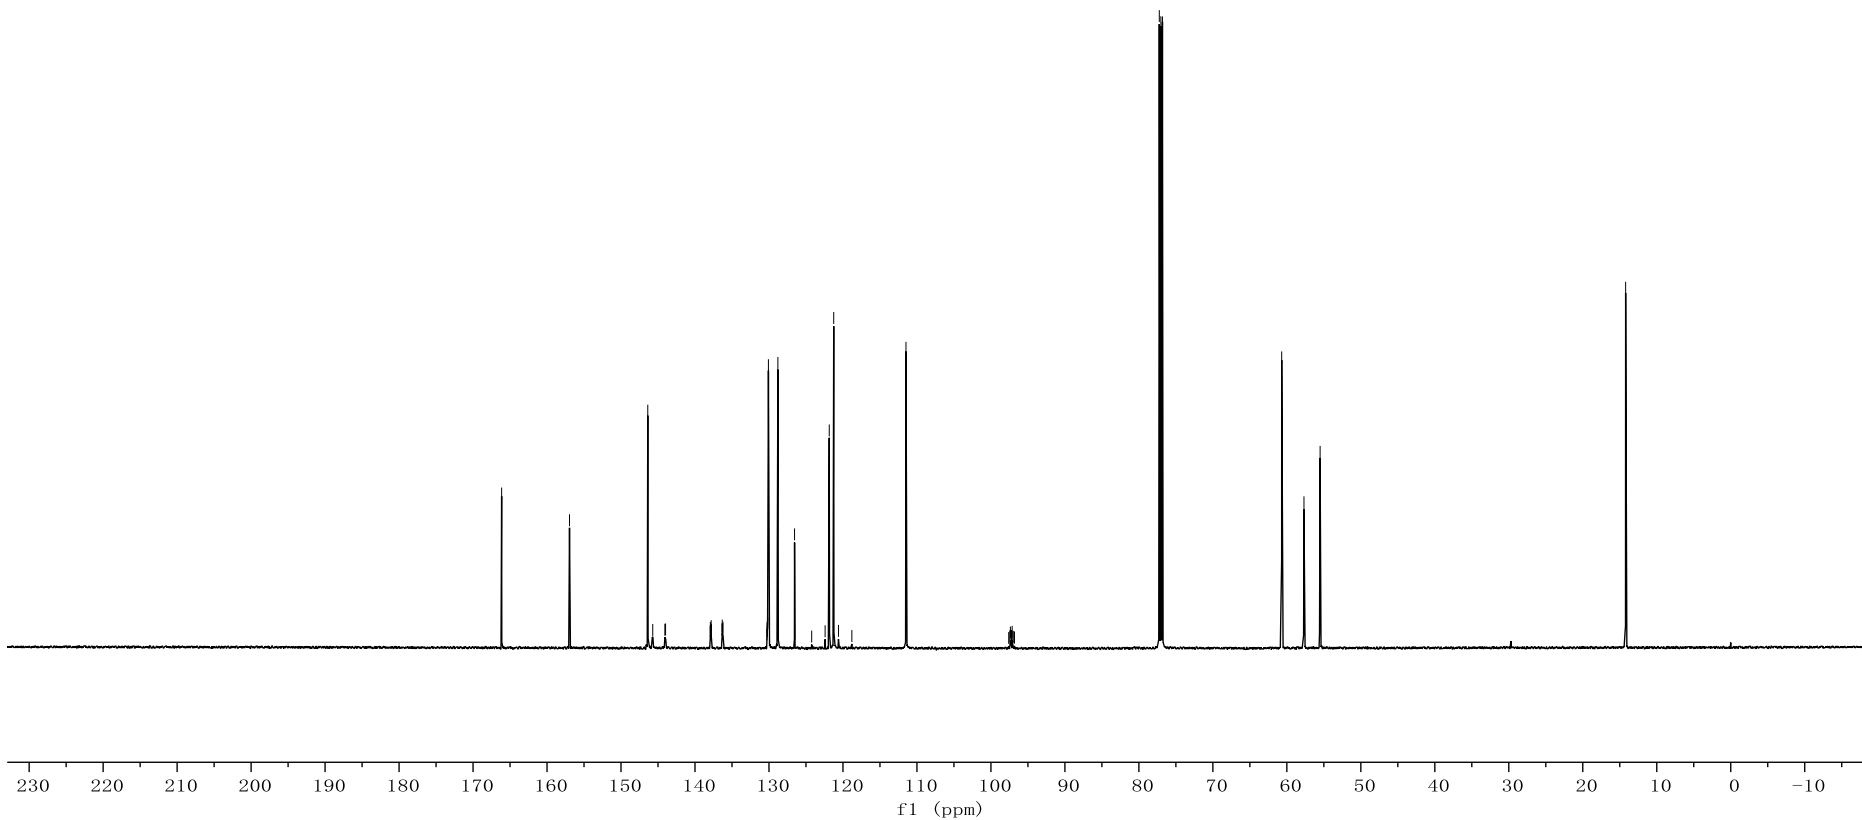

# <sup>19</sup>F NMR

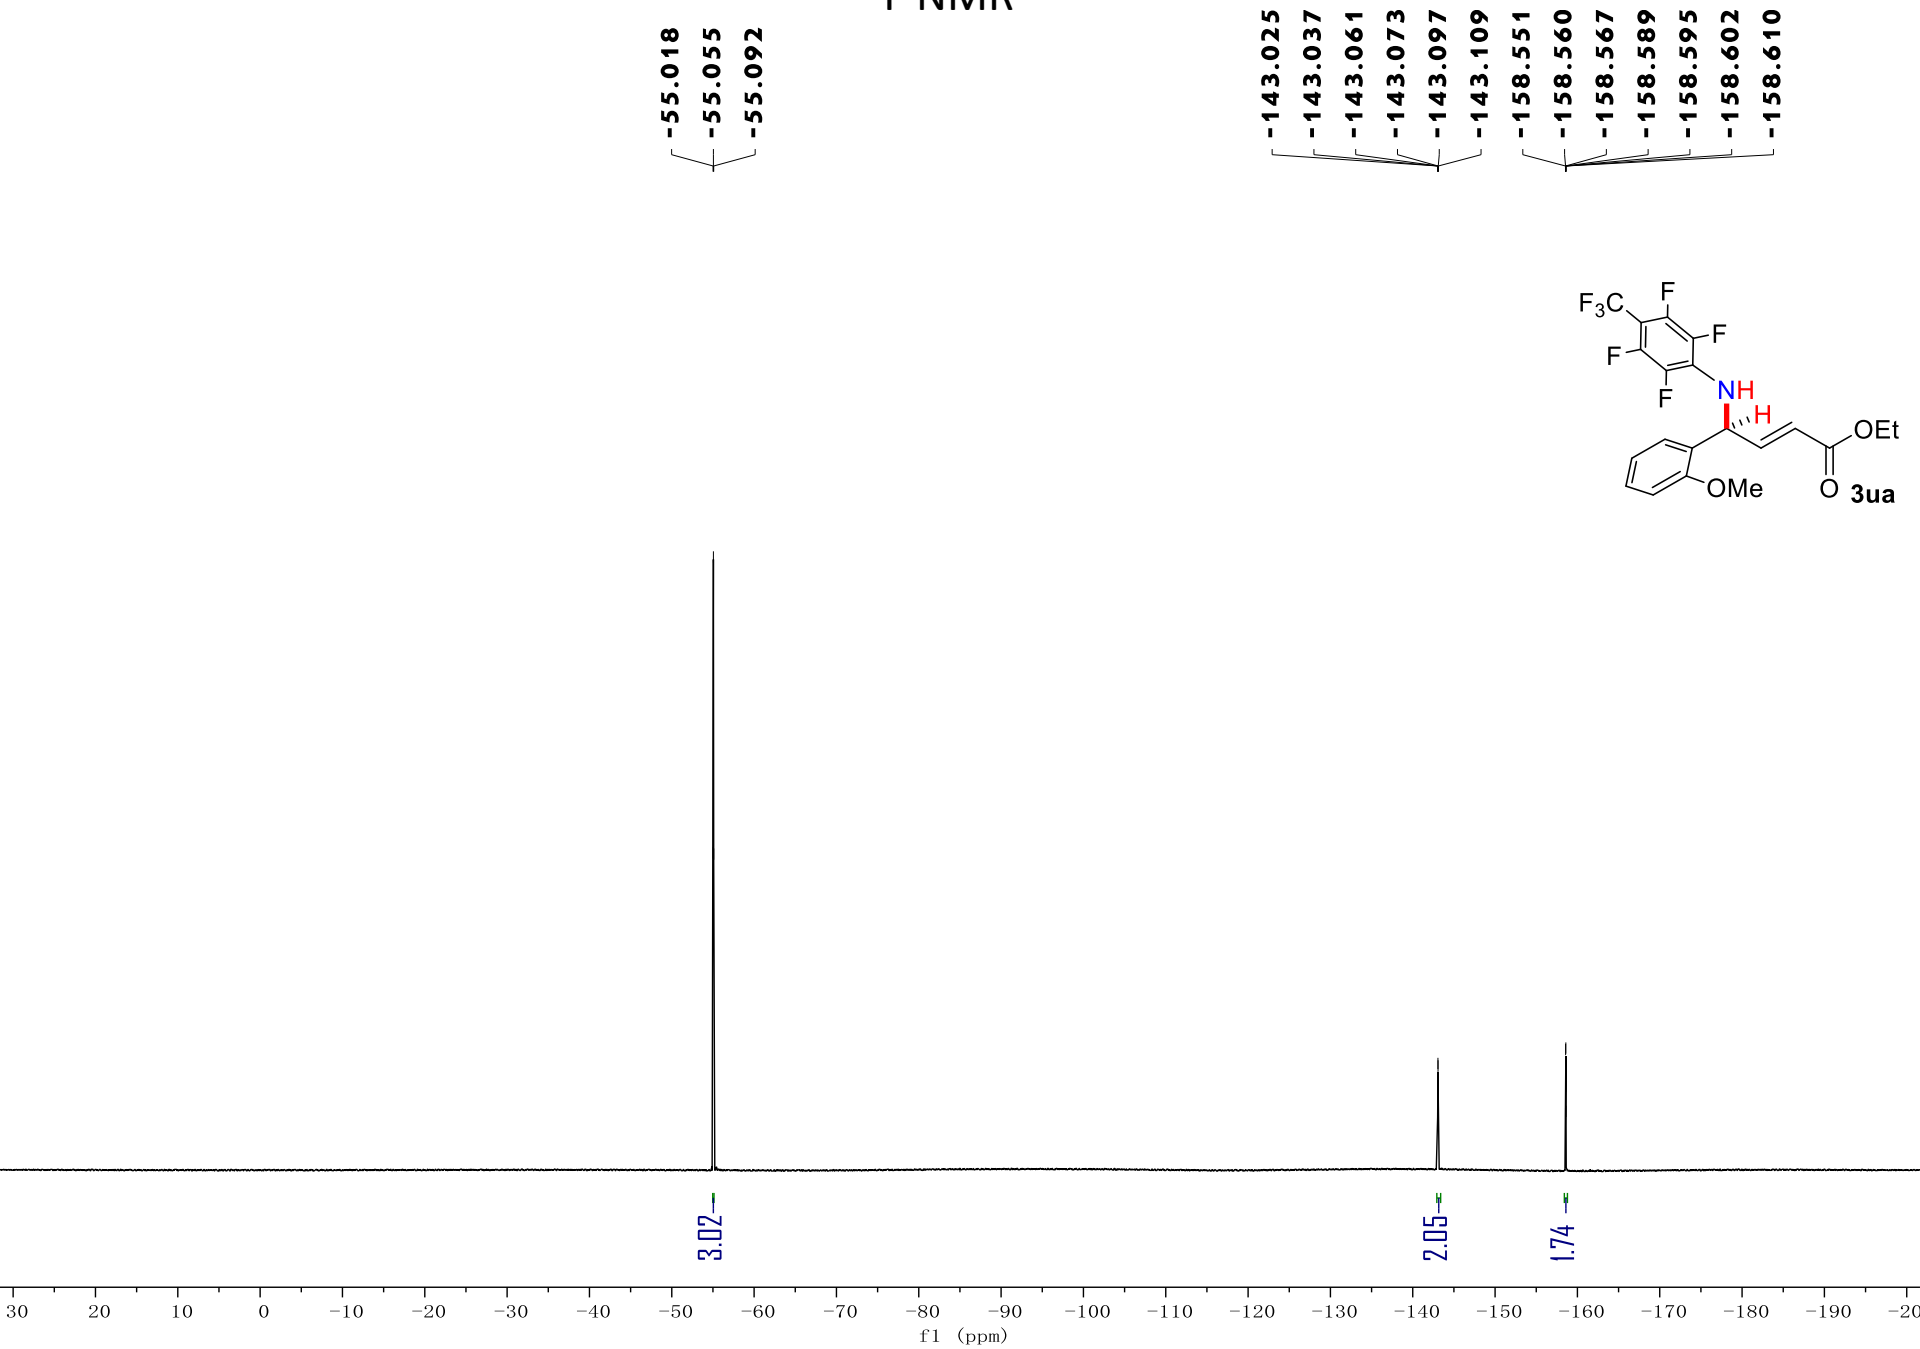

# HPLC

## Sample Information

Sample Name : P0X-0676-ODH-5%-0.8mL  
Sample ID : P0X-0676-ODH-5%-0.8mL  
Data File : P0X-0676-ODH-5%-0.8mL.lcd  
Method File : P0X-5.0%-0.8ml.lcm

## Chromatogram

mAU

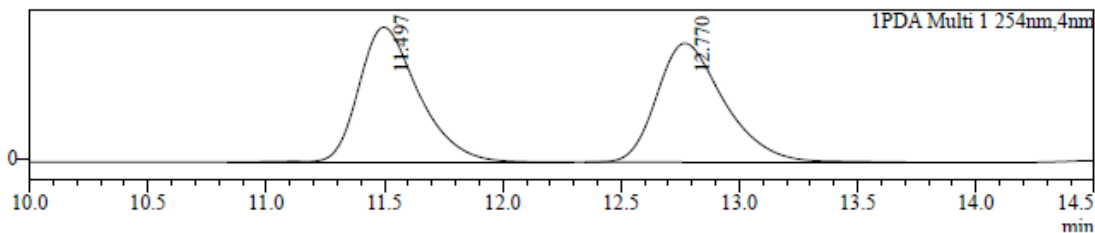

UV Spectrum  
Retention time = 11.497

mAU

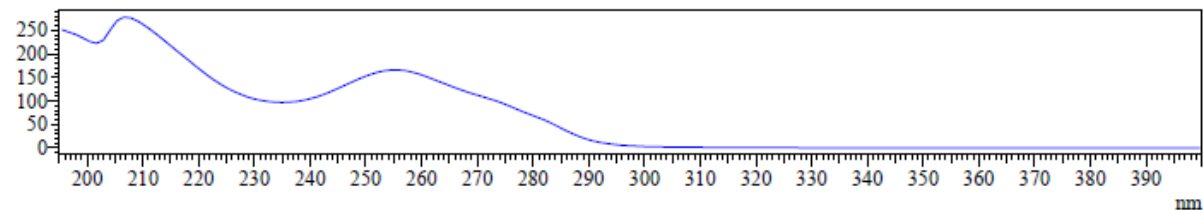

UV Spectrum  
Retention time = 12.770

mAU

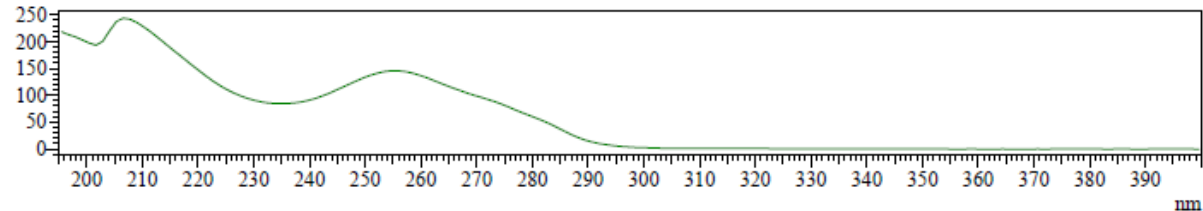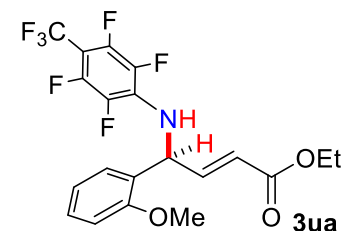

## Peak Table

PDA Ch1 254nm

| Peak# | Ret. Time | Area    | Area%   |
|-------|-----------|---------|---------|
| 1     | 11.497    | 2956116 | 50.097  |
| 2     | 12.770    | 2944648 | 49.903  |
| Total |           | 5900764 | 100.000 |

# HPLC

## Sample Information

Sample Name : P0X-0677ODH-5%-0.8mL  
Sample ID : P0X-0677ODH-5%-0.8mL  
Data File : P0X-0677-ODH-5%-0.8mL.lcd  
Method File : P0X-5.0%-0.8ml.lcm

## Chromatogram

mAU

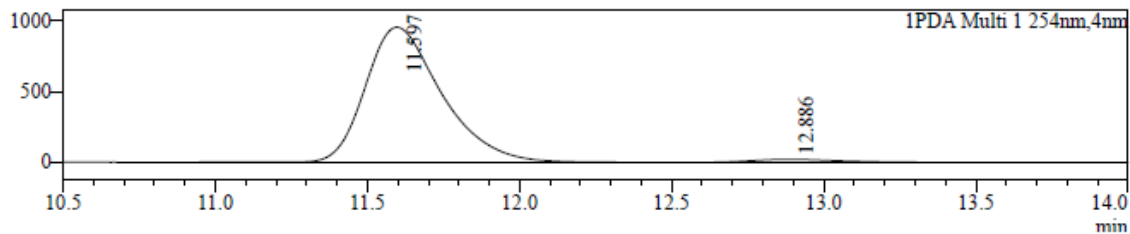

## UV Spectrum

Retention time = 11.597

mAU

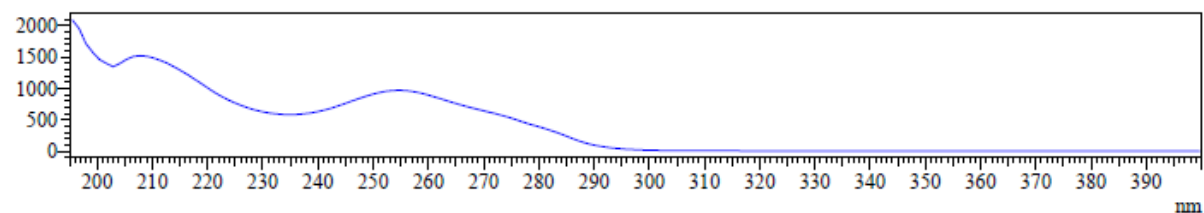

## UV Spectrum

Retention time = 12.886

mAU

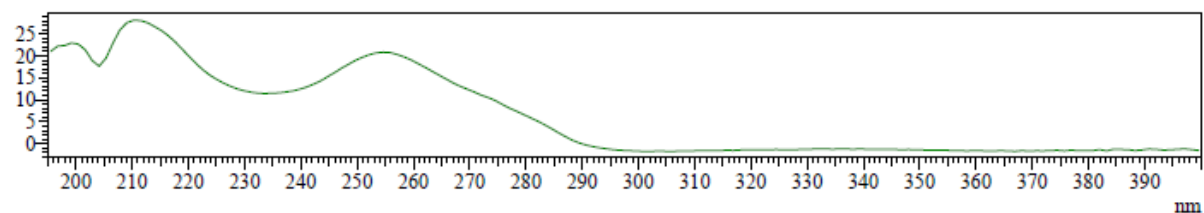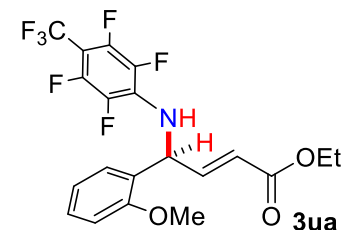

## Peak Table

PDA Ch1 254nm

| Peak# | Ret. Time | Area     | Area%   |
|-------|-----------|----------|---------|
| 1     | 11.597    | 16688022 | 97.412  |
| 2     | 12.886    | 443332   | 2.588   |
| Total |           | 17131354 | 100.000 |



# $^1\text{H}$ NMR

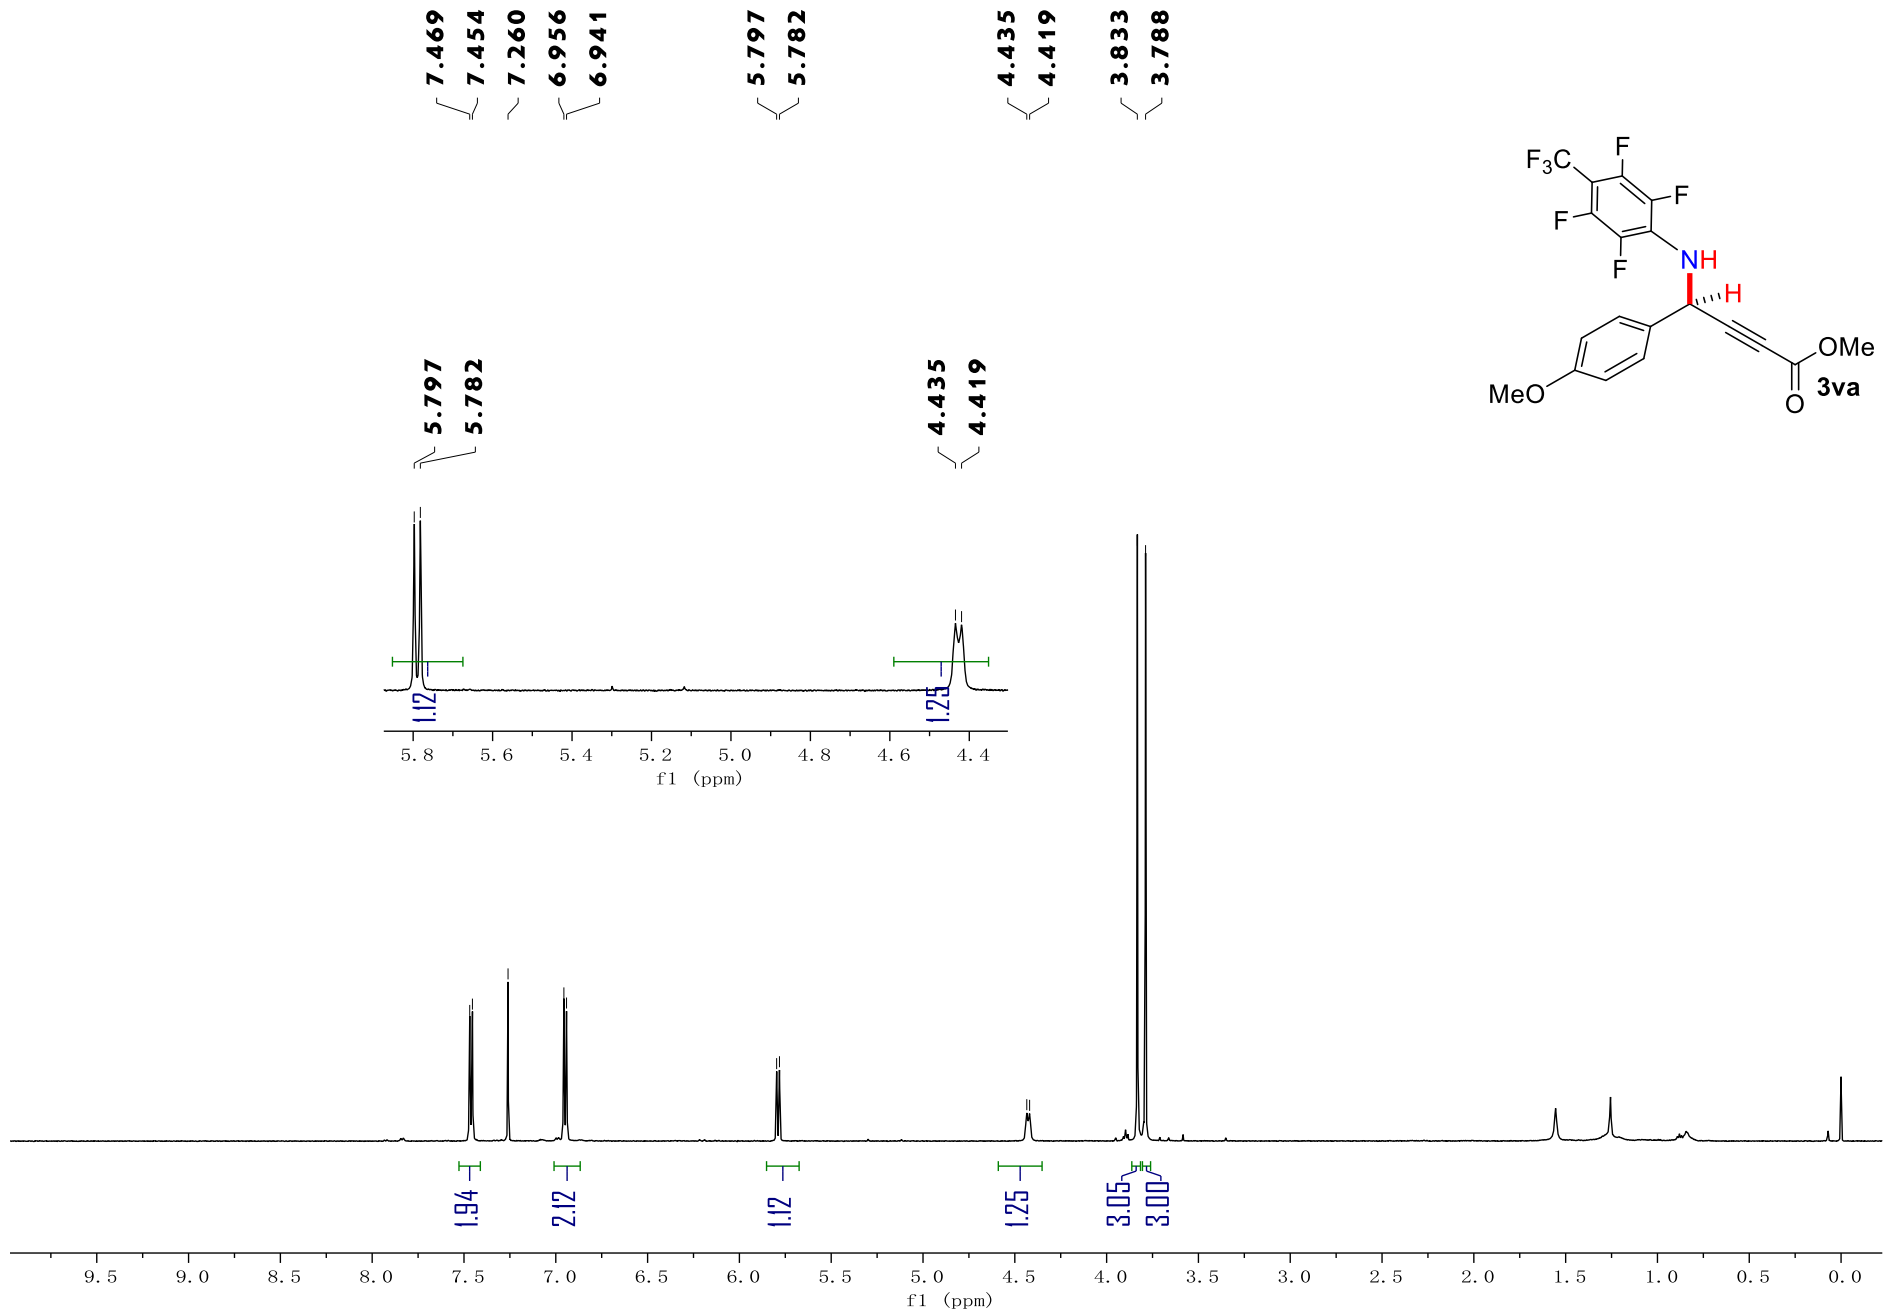

# $^{13}\text{C}$ NMR

163.019  
156.014  
148.353  
148.325  
148.272  
146.673  
146.574  
140.972  
140.868  
139.368  
139.302  
131.495  
131.419  
131.364  
131.338  
131.163  
130.844  
126.645  
124.853  
123.053  
117.257  
101.764  
101.534  
101.380

87.019  
80.197  
79.853  
79.841  
79.430  
79.429

58.083  
55.511  
53.025

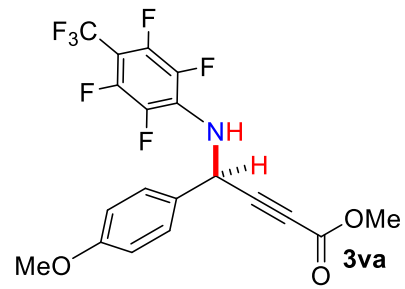

grease

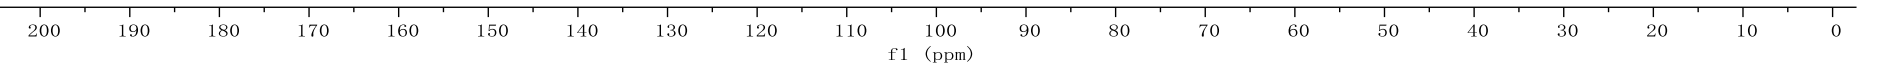

# $^{19}\text{F}$ NMR

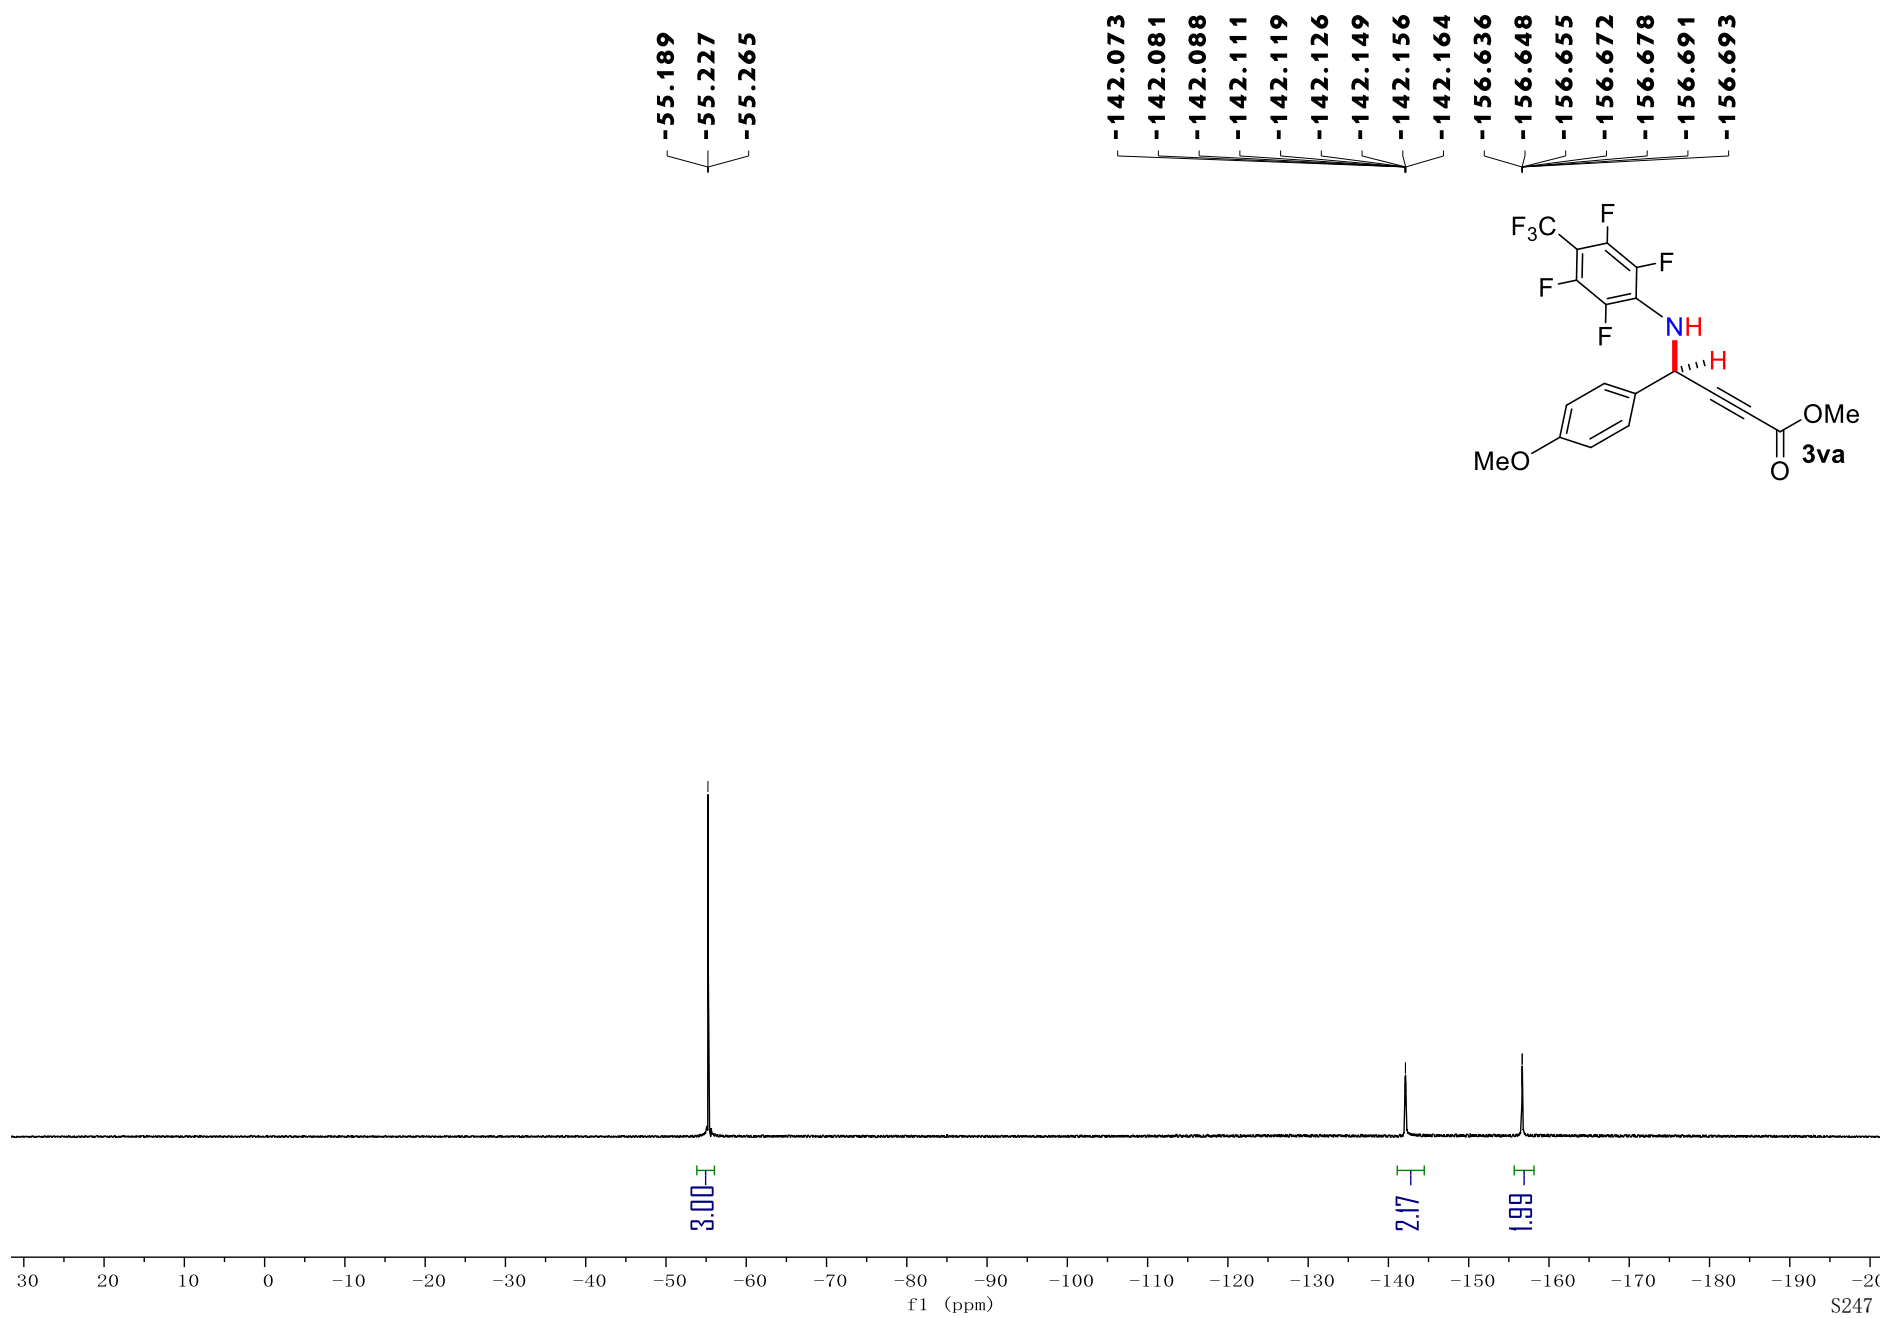

# HPLC

Sample Information  
Sample Name : P0X-0587-ASH-10%0.8mL  
Sample ID : P0X-0587-ASH-10%0.8mL  
Data File : P0X-0587-ASH-10%0.8mL.lcd  
Method File : YW-10%-0.8ml.lcm

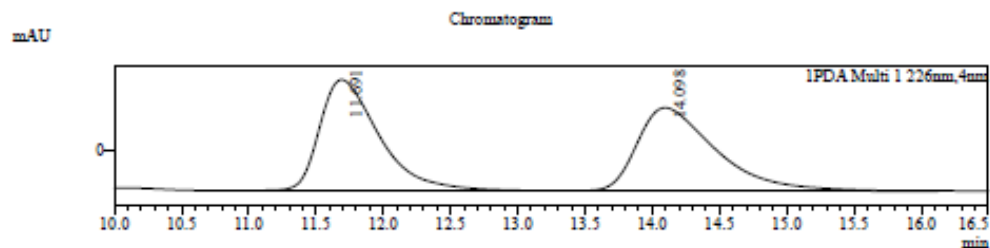

UV Spectrum  
Retention time = 11.691

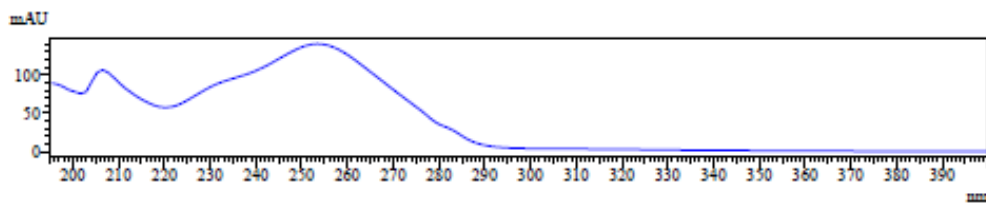

UV Spectrum  
Retention time = 14.098

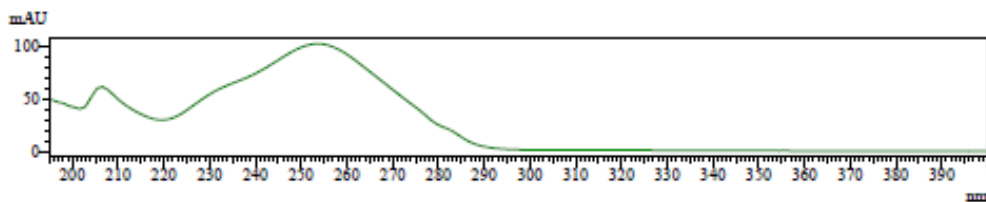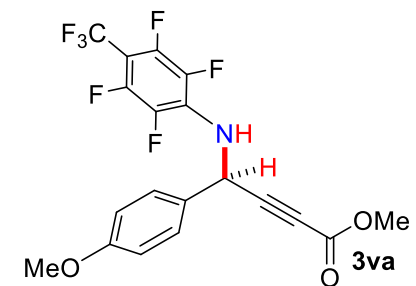

Peak Table

| Peak# | Ret. Time | Area    | Area%   |
|-------|-----------|---------|---------|
| 1     | 11.691    | 3451401 | 50.530  |
| 2     | 14.098    | 3379031 | 49.470  |
| Total |           | 6830432 | 100.000 |

# HPLC

Sample Information  
Sample Name : POX-0588-ASH-10%0.8mL  
Sample ID : POX-0588-ASH-10%0.8mL  
Data File : POX-0588-ASH-10%0.8mL.lcd  
Method File : YW-10%-0.8ml.lcm

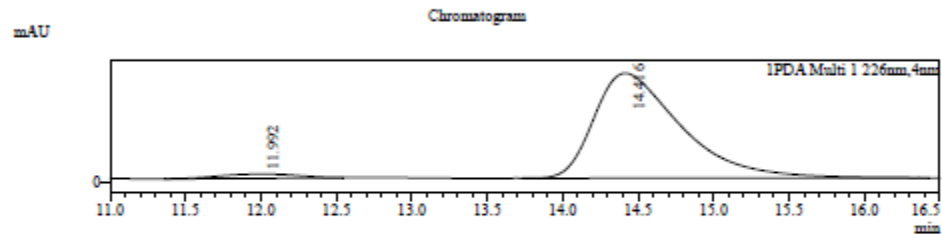

UV Spectrum  
Retention time = 11.992

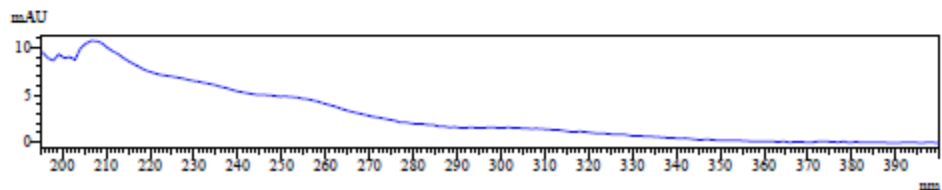

UV Spectrum  
Retention time = 14.416

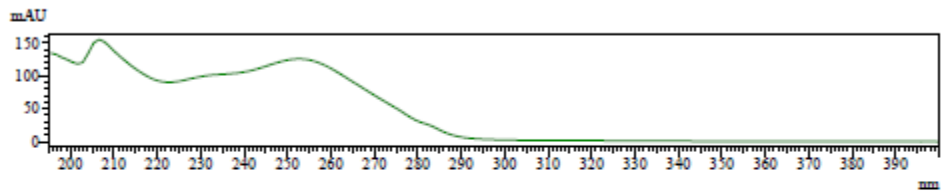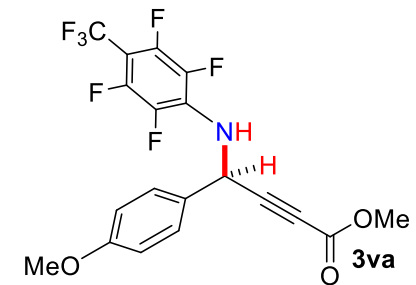

Peak Table

PDA Ch1 226nm

| Peak# | Ret. Time | Area    | Area%   |
|-------|-----------|---------|---------|
| 1     | 11.992    | 131952  | 3.505   |
| 2     | 14.416    | 3632225 | 96.495  |
| Total |           | 3764177 | 100.000 |

# <sup>1</sup>H NMR

7.415  
7.402  
7.382  
7.369  
7.356  
7.004  
6.991  
6.979  
6.960  
6.947  
5.988  
5.972  
5.047  
5.041  
5.030  
5.024  
3.900  
3.759

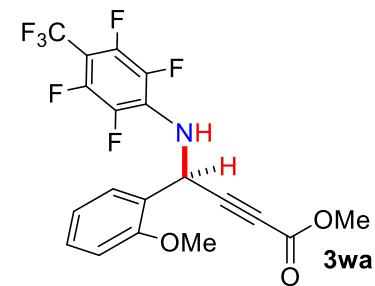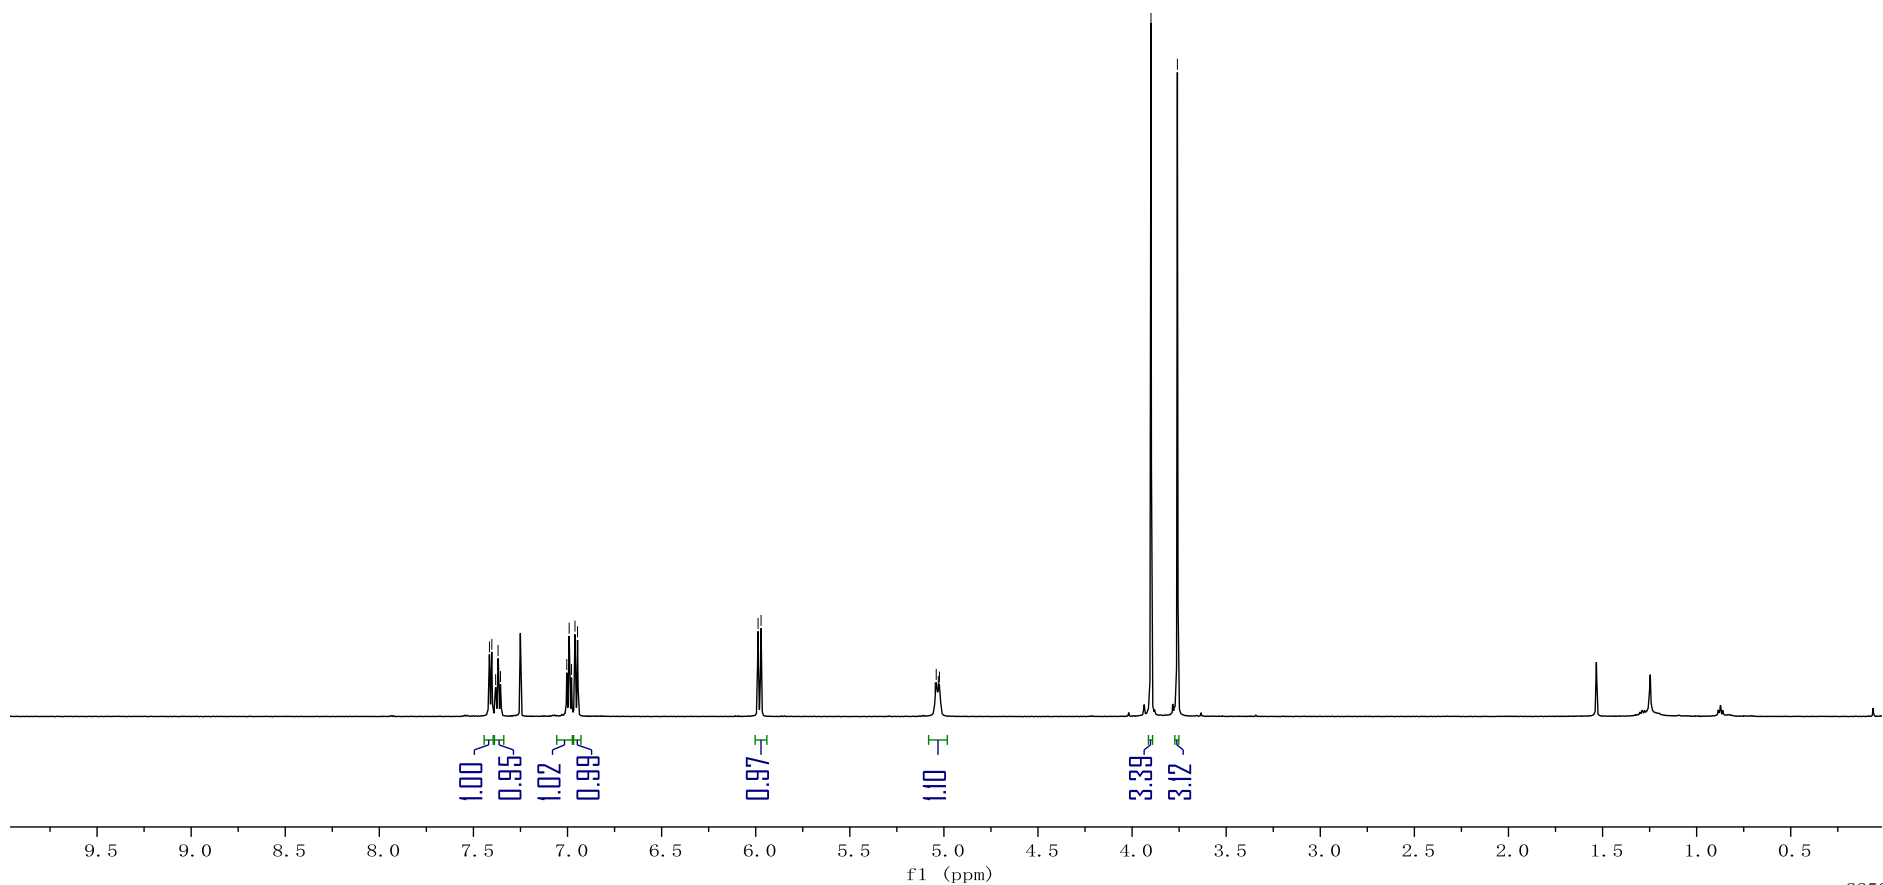

<sup>13</sup>C NMR

156.920  
153.579  
145.631  
143.931  
138.272  
138.164  
136.666  
136.561  
130.813  
129.281  
129.254  
129.181  
129.105  
129.081  
128.701  
124.482  
124.086  
122.278  
121.081  
120.465  
111.519  
98.566  
98.566  
98.335  
98.117  
84.891  
77.212  
77.000  
76.789  
76.080  
55.671  
52.781  
47.466

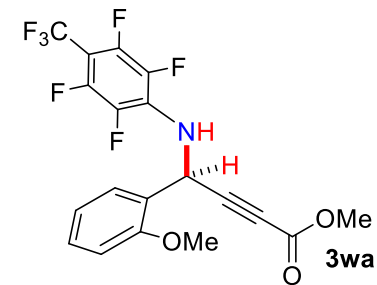

200 190 180 170 160 150 140 130 120 110 100 90 80 70 60 50 40 30 20 10 0 -10  
f1 (ppm)

# <sup>19</sup>F NMR

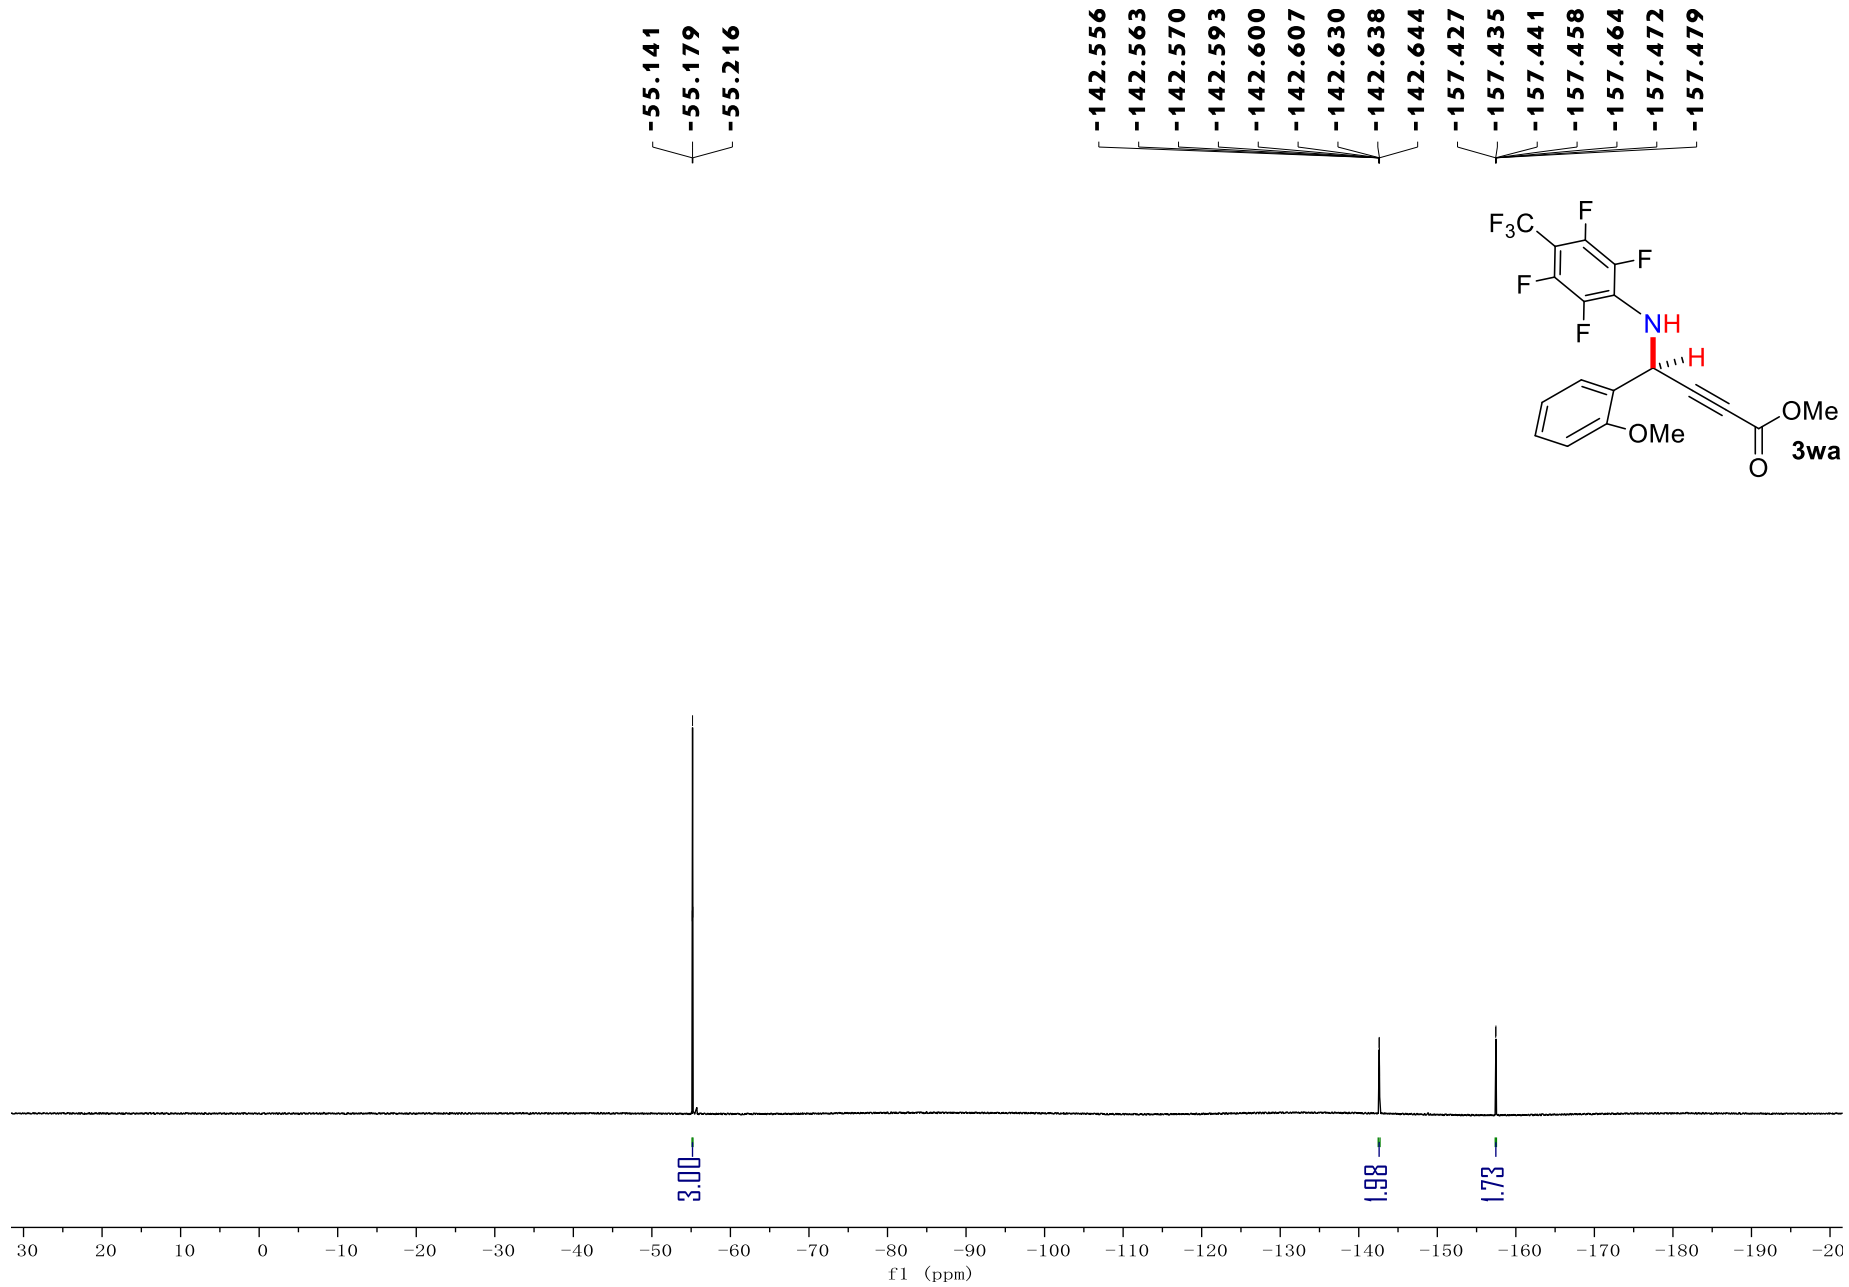



# HPLC

Sample Information  
 Sample Name : P0X-0602-OJH10%-0.8mL  
 Sample ID : P0X-0602-OJH10%-0.8mL  
 Data File : P0X-0602-OJH10%-0.8mL.lcd  
 Method File : YW-10%-0.8mL.lcm

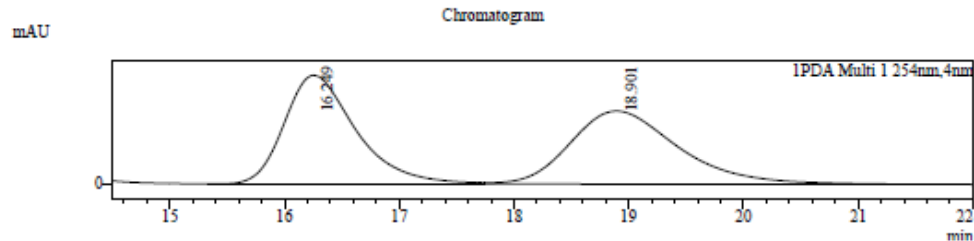

UV Spectrum  
 Retention time = 16.249

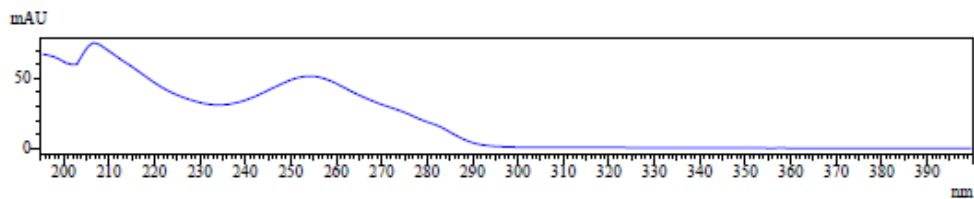

UV Spectrum  
 Retention time = 18.901

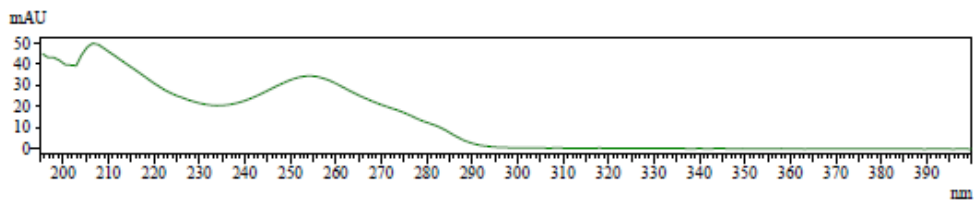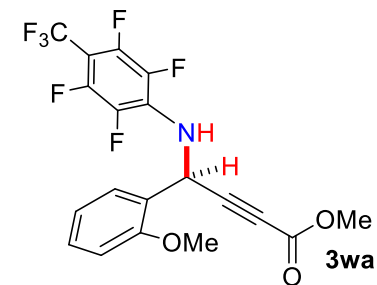

Peak Table

PDA Ch1 254nm

| Peak# | Ret. Time | Area    | Area%   |
|-------|-----------|---------|---------|
| 1     | 16.249    | 2206862 | 49.676  |
| 2     | 18.901    | 2235673 | 50.324  |
| Total |           | 4442536 | 100.000 |

# HPLC

Sample Information  
Sample Name : P0X-0603-OJH-10%-0.8mL  
Sample ID : P0X-0603-OJH-10%-0.8mL  
Data File : P0X-0603-OJH-10%-0.8mL.lcd  
Method File : YW-10%-0.8ml.lcm

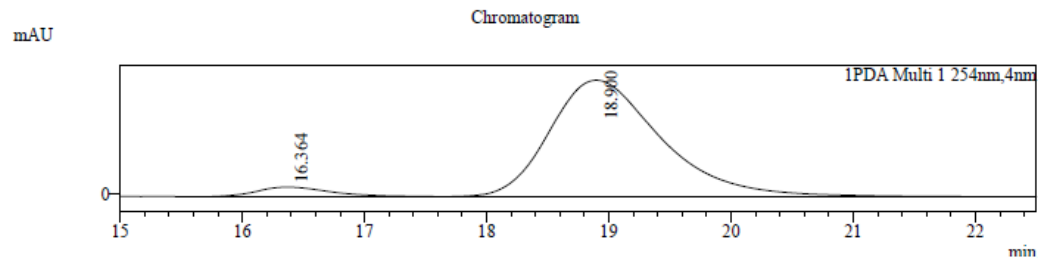

UV Spectrum  
Retention time = 16.364

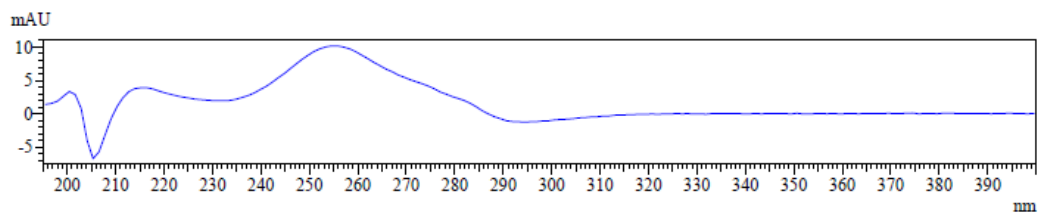

UV Spectrum  
Retention time = 18.900

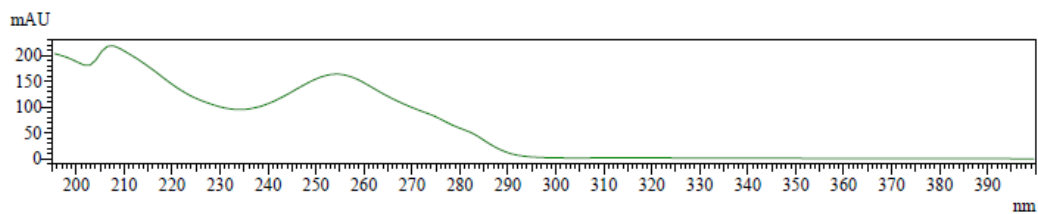

Peak Table

PDA Ch1 254nm

| Peak# | Ret. Time | Area     | Area%   |
|-------|-----------|----------|---------|
| 1     | 16.364    | 582768   | 5.218   |
| 2     | 18.900    | 10586414 | 94.782  |
| Total |           | 11169182 | 100.000 |

# $^1\text{H}$ NMR

7.026  
7.012  
6.995  
6.841  
6.828

6.012  
5.748  
5.732

4.454  
4.438

3.789

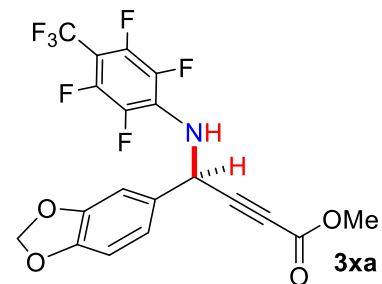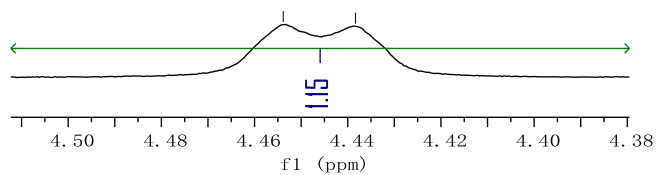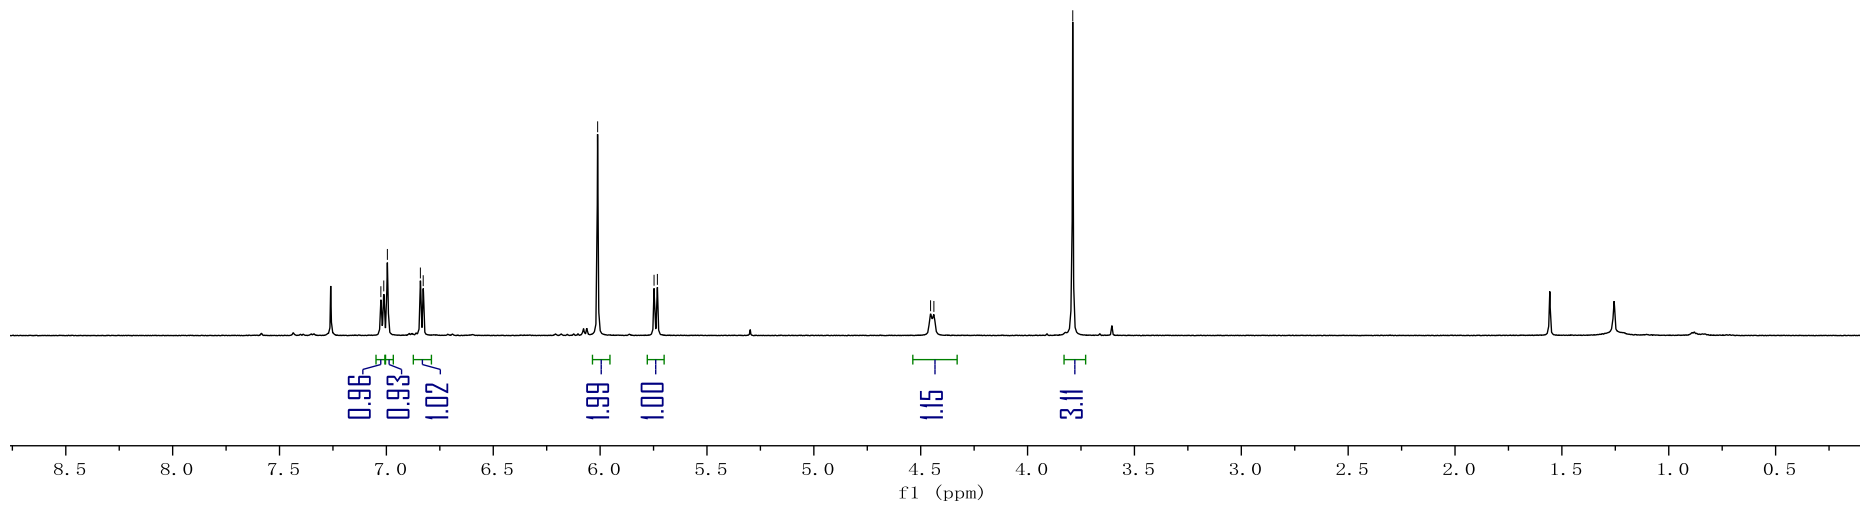

# $^{13}\text{C}$ NMR

153.289  
148.563  
148.476  
145.670  
143.937  
138.311  
136.705  
129.902  
128.715  
128.660  
128.638  
128.615  
128.562  
123.990  
122.190  
121.009  
120.378  
118.567  
108.711  
108.708  
107.500  
101.641  
99.353  
99.264  
99.176  
99.118  
99.033  
98.800  
84.046  
77.625  
77.211  
77.000  
76.788  
52.987  
50.644

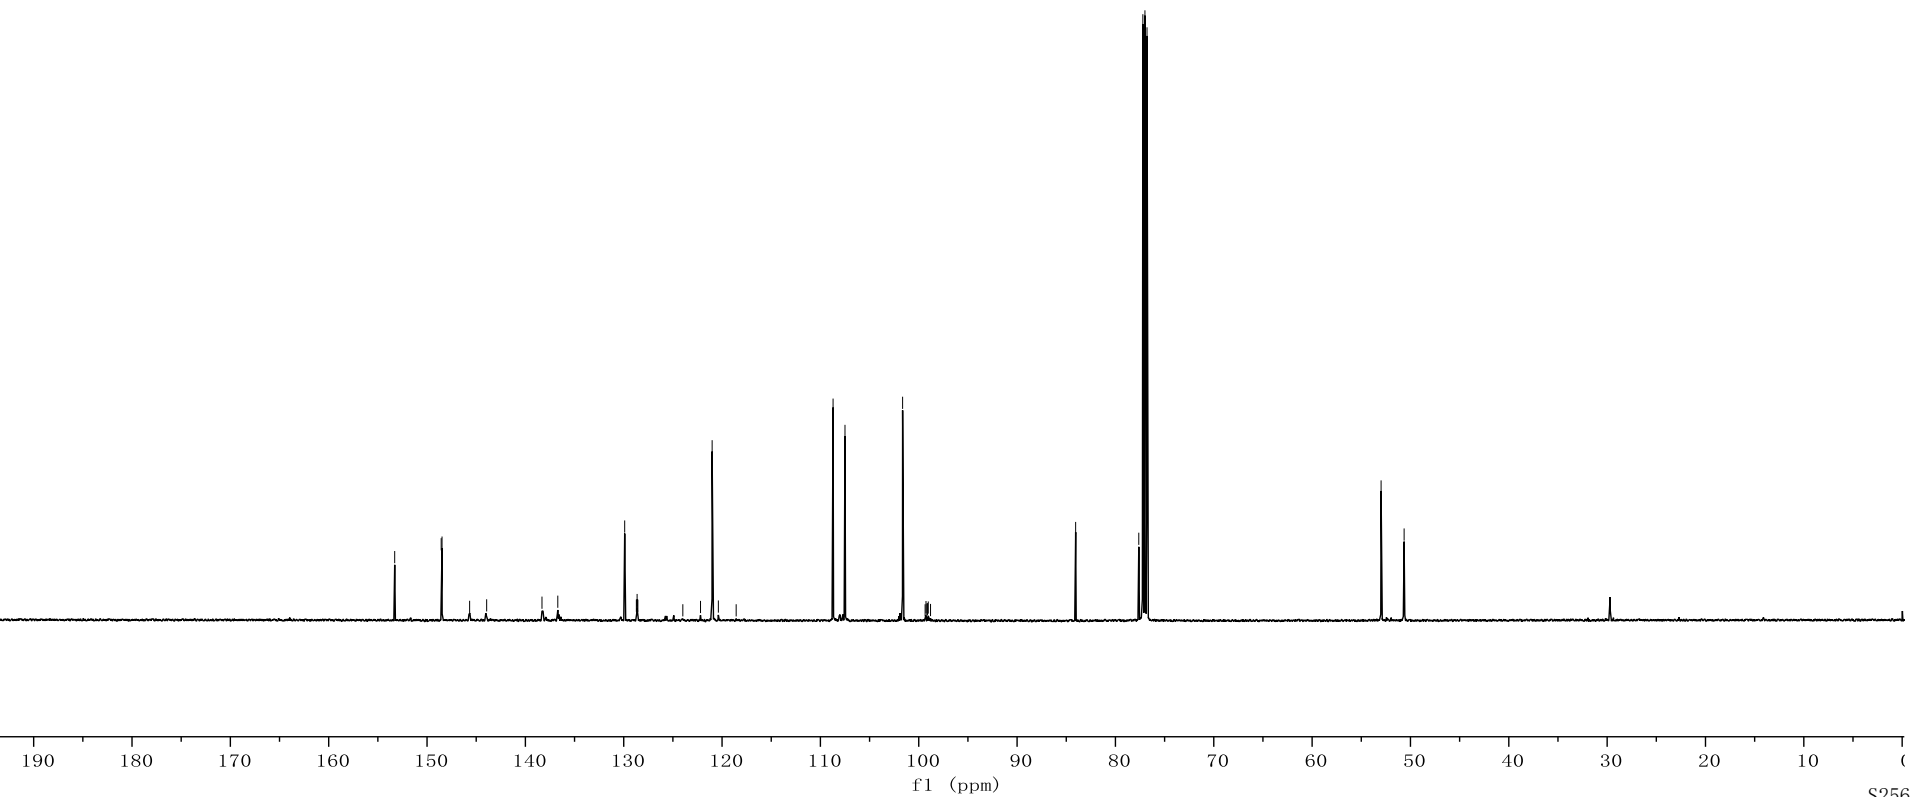

# $^{19}\text{F}$ NMR

-55.215  
-55.252  
-55.289

-141.987  
-142.010  
-142.025  
-142.048  
-156.586  
-156.592  
-156.609  
-156.615

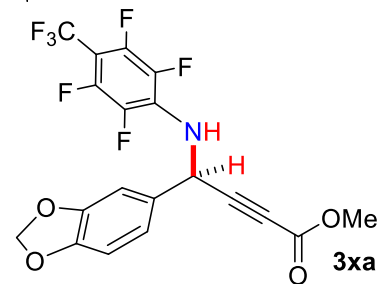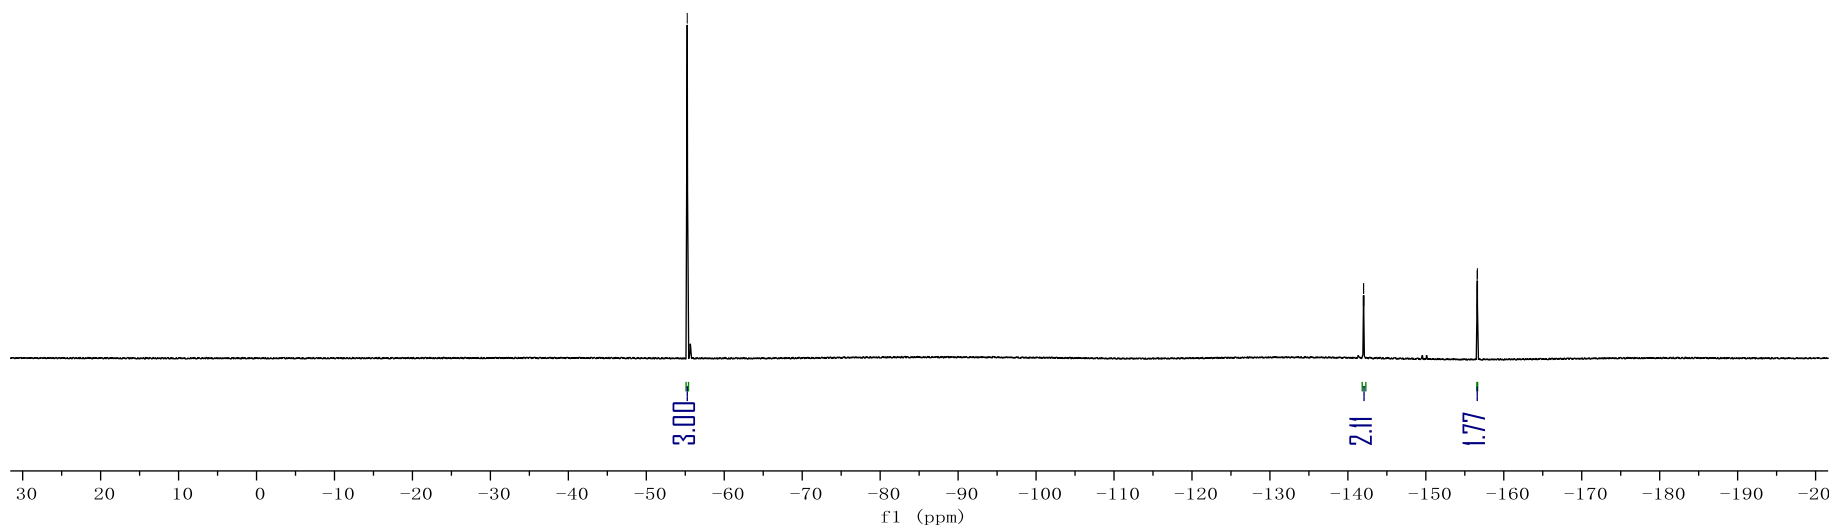

# HPLC

## Sample Information

Sample Name : P0X-0627-ASH-10%-0.8mL  
Sample ID : P0X-0627-ASH-10%-0.8mL  
Data File : P0X-0627-ASH-10%-0.8mL.lcd  
Method File : P0X-10%-0.8ml.lcm

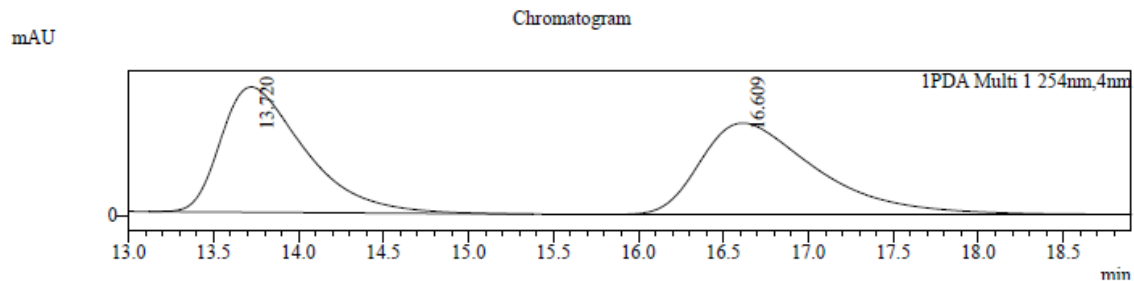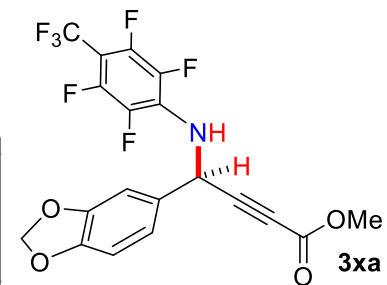

UV Spectrum  
Retention time = 13.720

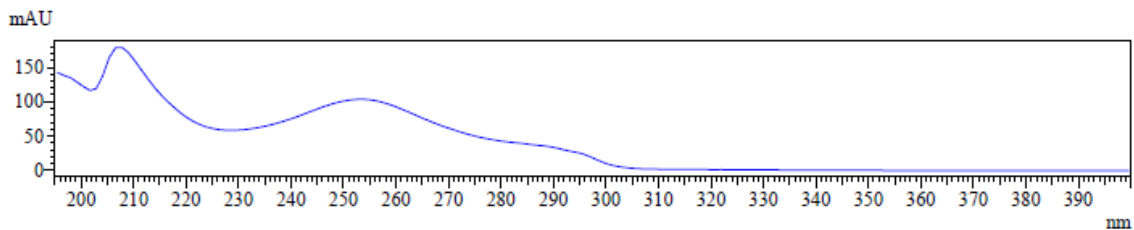

UV Spectrum  
Retention time = 16.609

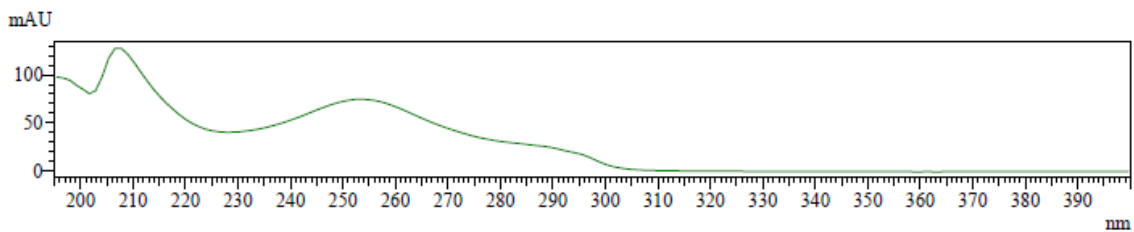

## Peak Table

PDA Ch1 254nm

| Peak# | Ret. Time | Area    | Area%   |
|-------|-----------|---------|---------|
| 1     | 13.720    | 3433019 | 49.735  |
| 2     | 16.609    | 3469604 | 50.265  |
| Total |           | 6902624 | 100.000 |

# HPLC

Sample Information  
Sample Name : POX-0628X-ASH-10%-0.8mL  
Sample ID : POX-0628X-ASH-10%-0.8mL  
Data File : POX-0628X-ASH-10%-0.8mL.lcd  
Method File : POX-10%-0.8ml.lcm

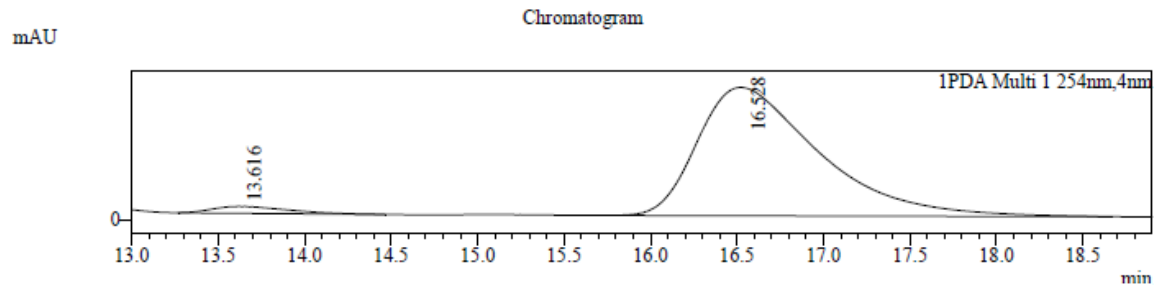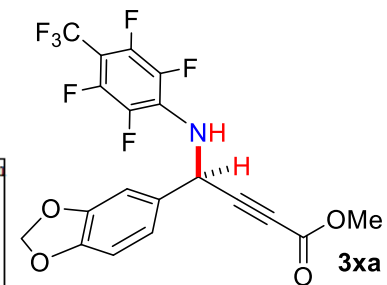

UV Spectrum  
Retention time = 13.616

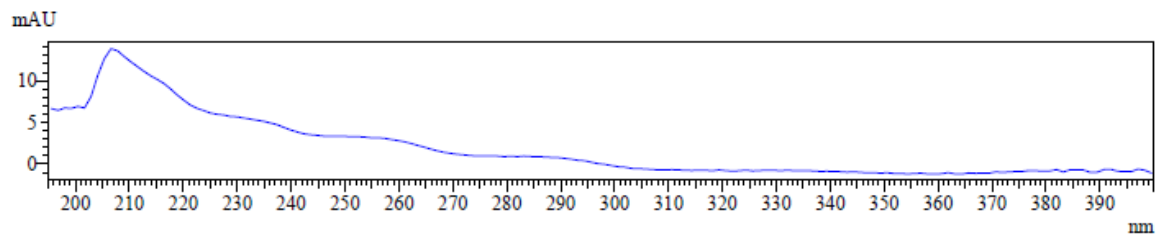

UV Spectrum  
Retention time = 16.528

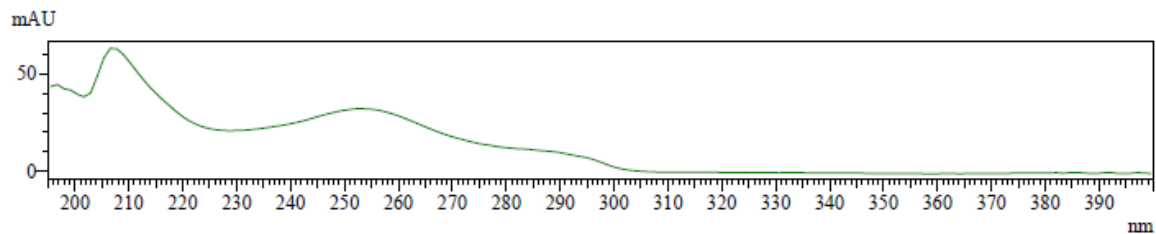

Peak Table

| Peak# | Ret. Time | Area    | Area%   |
|-------|-----------|---------|---------|
| 1     | 13.616    | 49819   | 3.221   |
| 2     | 16.528    | 1496756 | 96.779  |
| Total |           | 1546574 | 100.000 |

# $^1\text{H}$ NMR

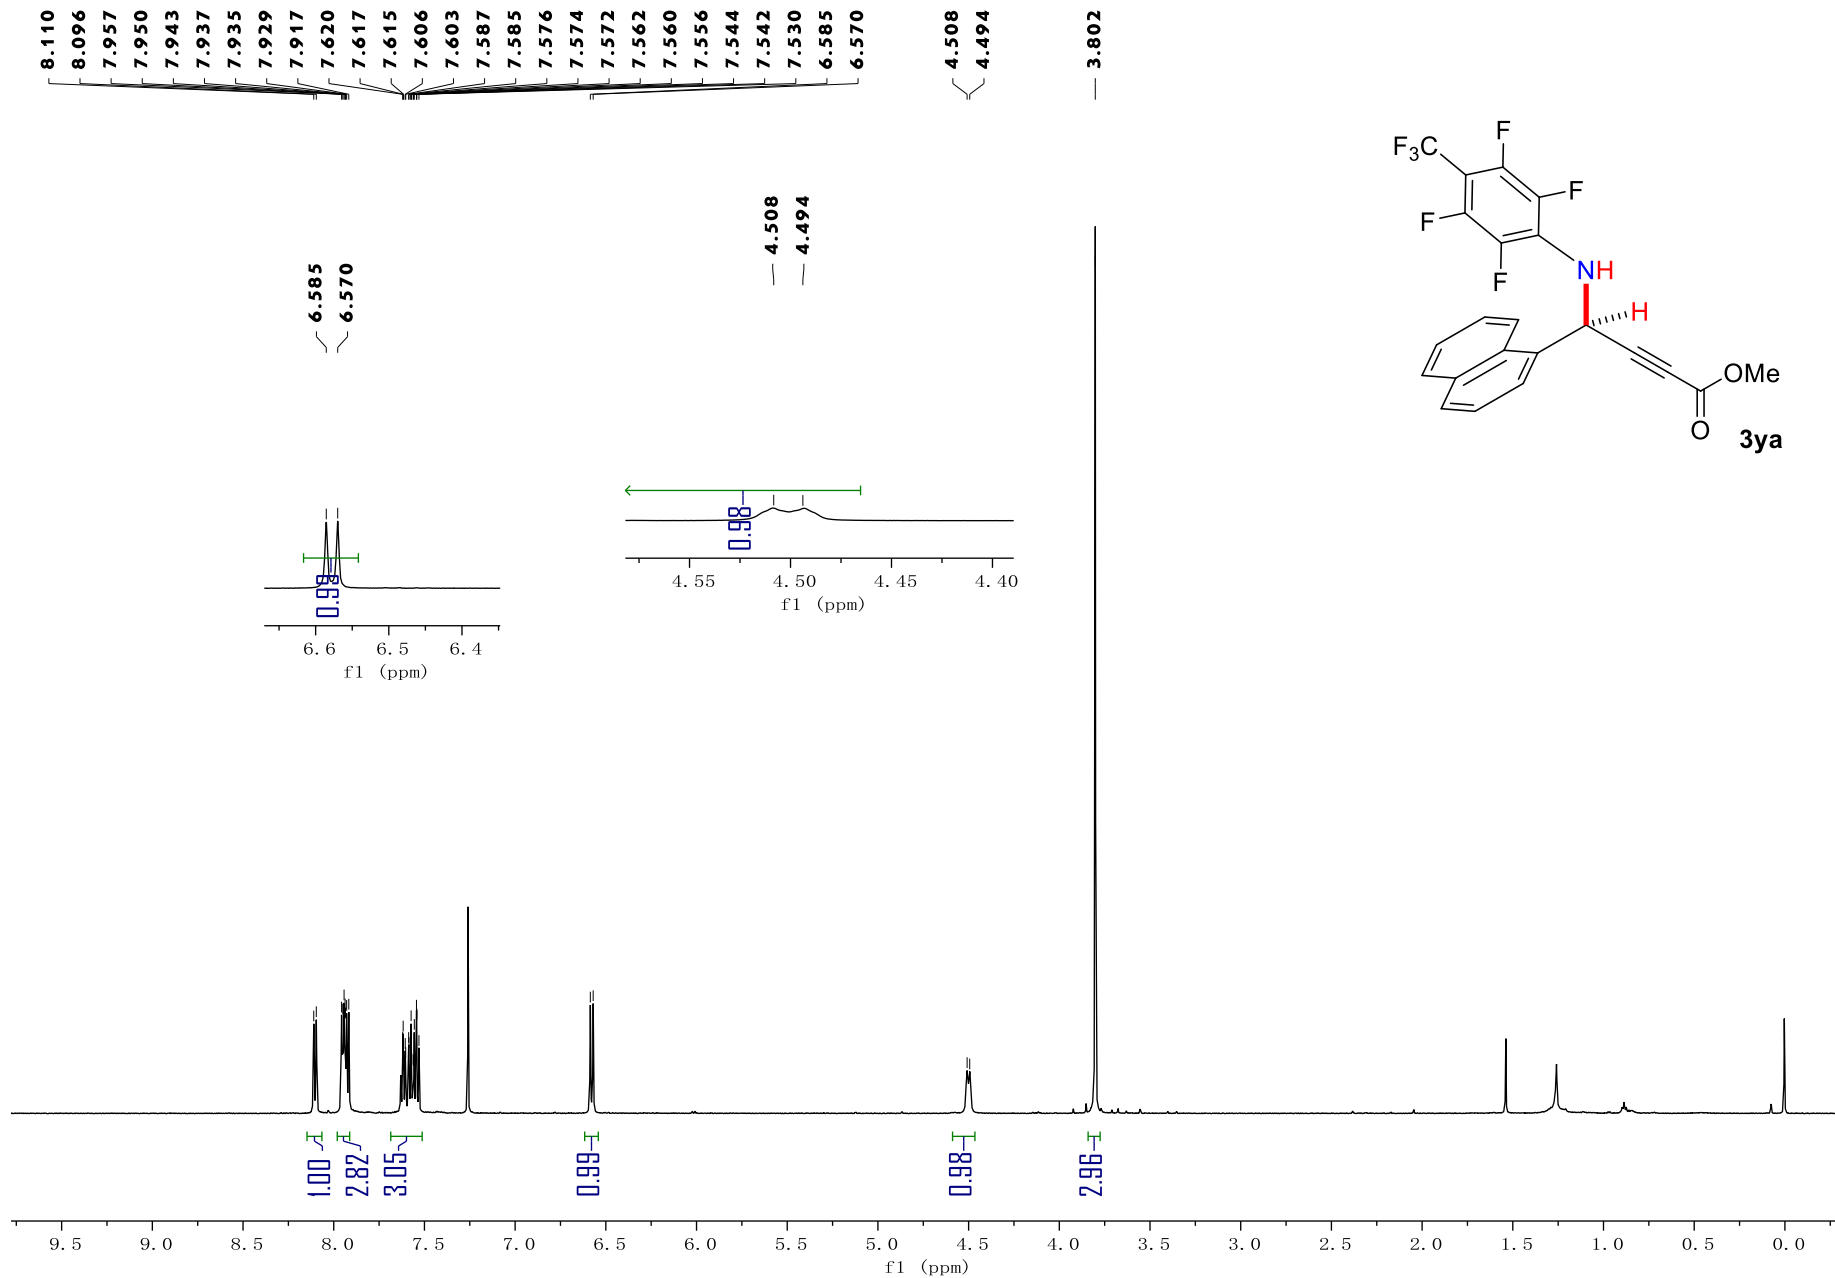



# <sup>13</sup>C NMR

155.983  
148.404  
146.665  
141.116  
139.405  
136.790  
133.681  
133.318  
132.893  
131.838  
131.549  
131.474  
131.397  
130.044  
129.139  
128.645  
127.953  
125.307  
124.864  
123.051  
102.000  
101.768  
101.679

86.652

81.007

55.654

51.215

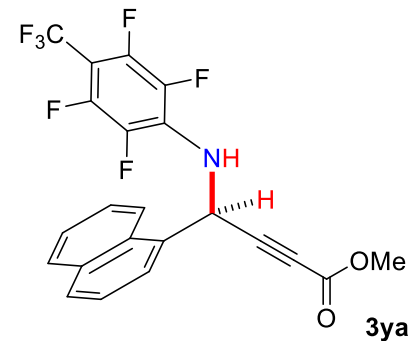

grease

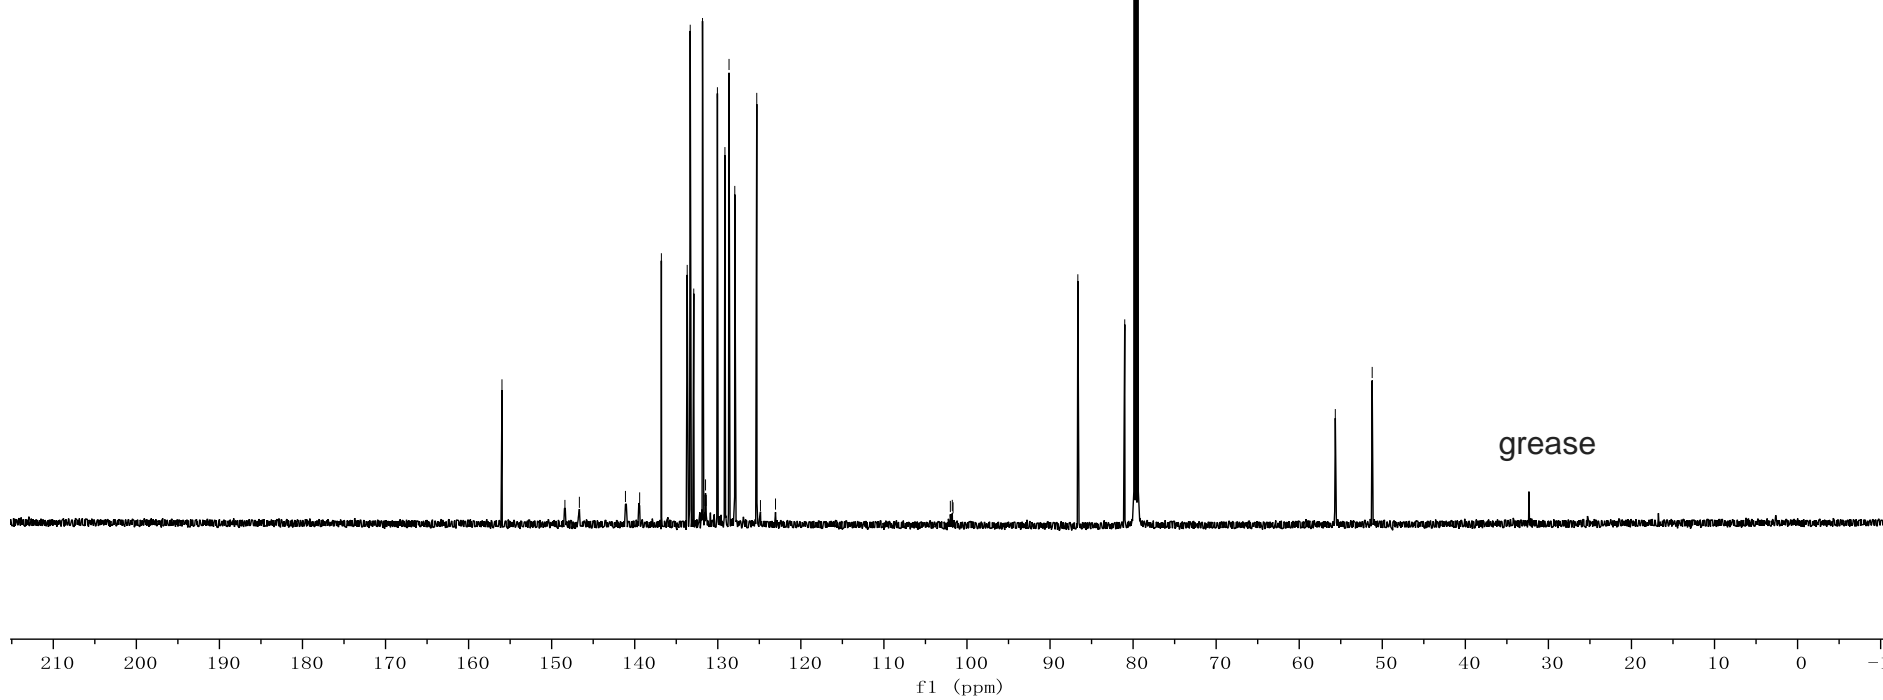

# <sup>19</sup>F NMR

-55.183  
-55.220  
-55.257

-141.862  
-141.885  
-141.900  
-141.923  
-156.785  
-156.793  
-156.799  
-156.816  
-156.822  
-156.830

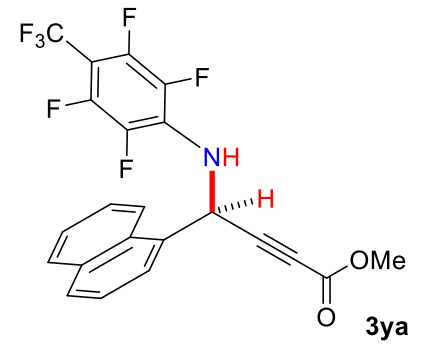

3.00

2.27

1.74

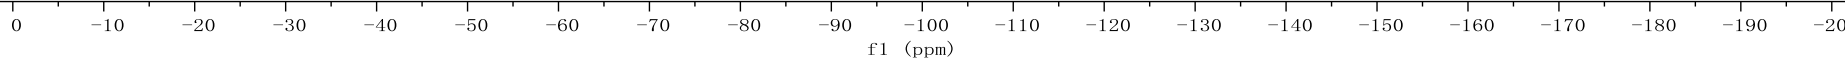

# HPLC

C:\ESStart\Projects\Default\Data\F0X0891ASH-56-0.8mL  
C:\Documents and Settings\zhang\Desktop\WCL\Method.net

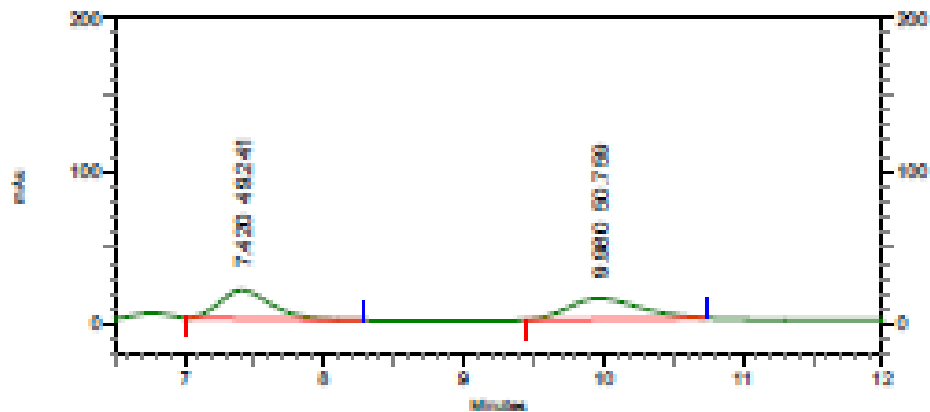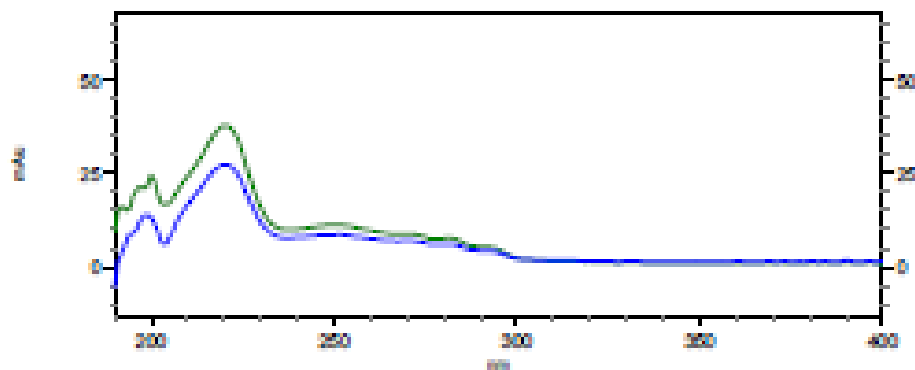

4: 250 nm, 4  
nm Results

| PK # | Retention Time | Area Percent |
|------|----------------|--------------|
| 1    | 7.420          | 49.241       |
| 2    | 9.980          | 50.759       |

|        |         |
|--------|---------|
| Totals | 100.000 |
|--------|---------|

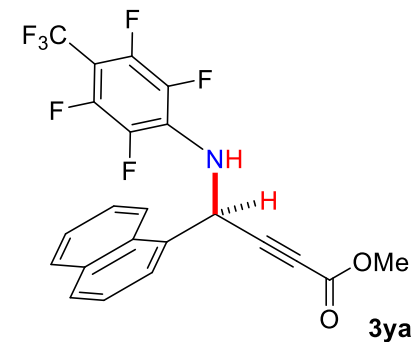

# HPLC

C:\EZStart\Projects\Default\Data\POX0608ASH-5%-0.8mL  
C:\Documents and Settings\zhang\Desktop\WCL\Method.met

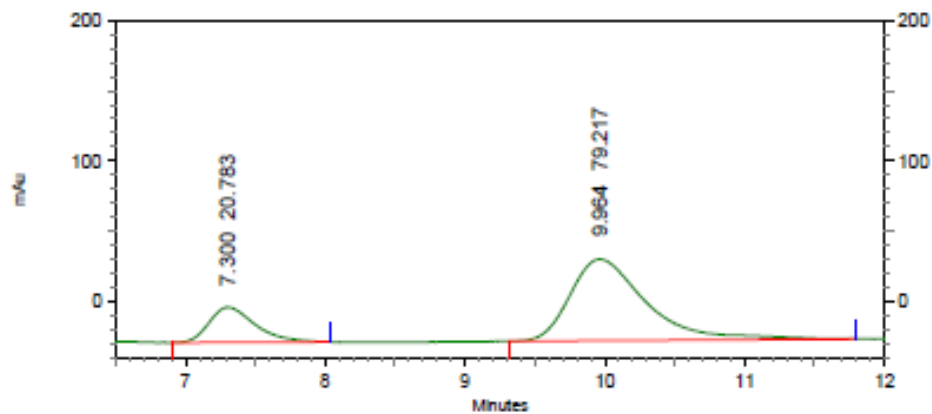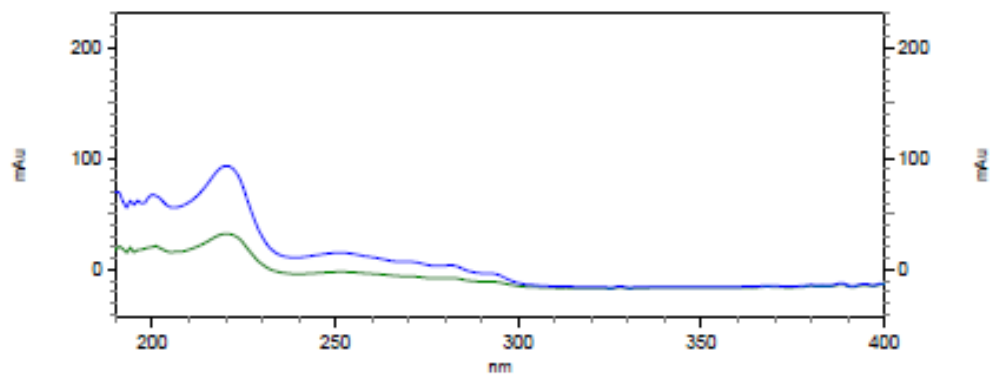

4: 250 nm, 4

nm Results

| Pk # | Retention Time | Area Percent |
|------|----------------|--------------|
| 1    | 7.300          | 20.783       |
| 2    | 9.964          | 79.217       |

|        |         |
|--------|---------|
| Totals | 100.000 |
|--------|---------|



# <sup>1</sup>H NMR

7.384  
7.382  
7.374  
7.372  
7.281  
7.279  
7.274  
7.271  
7.038  
7.031  
7.028  
7.021  
6.070  
6.051

4.593  
4.574

3.802

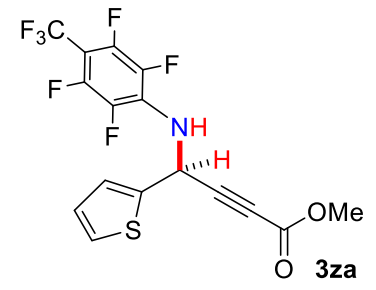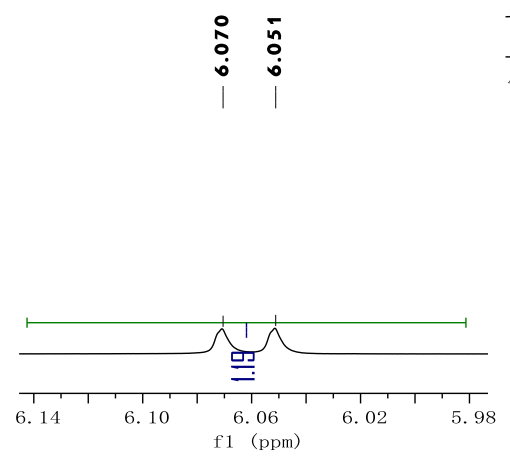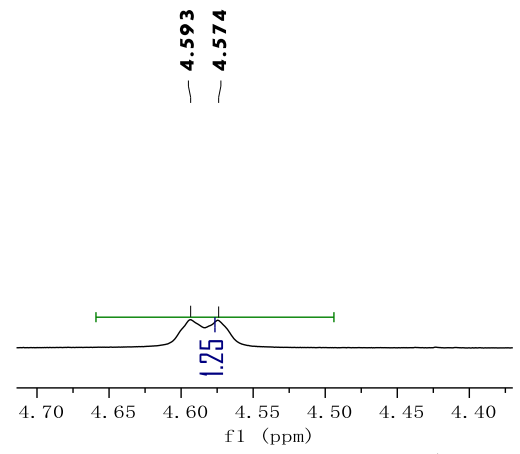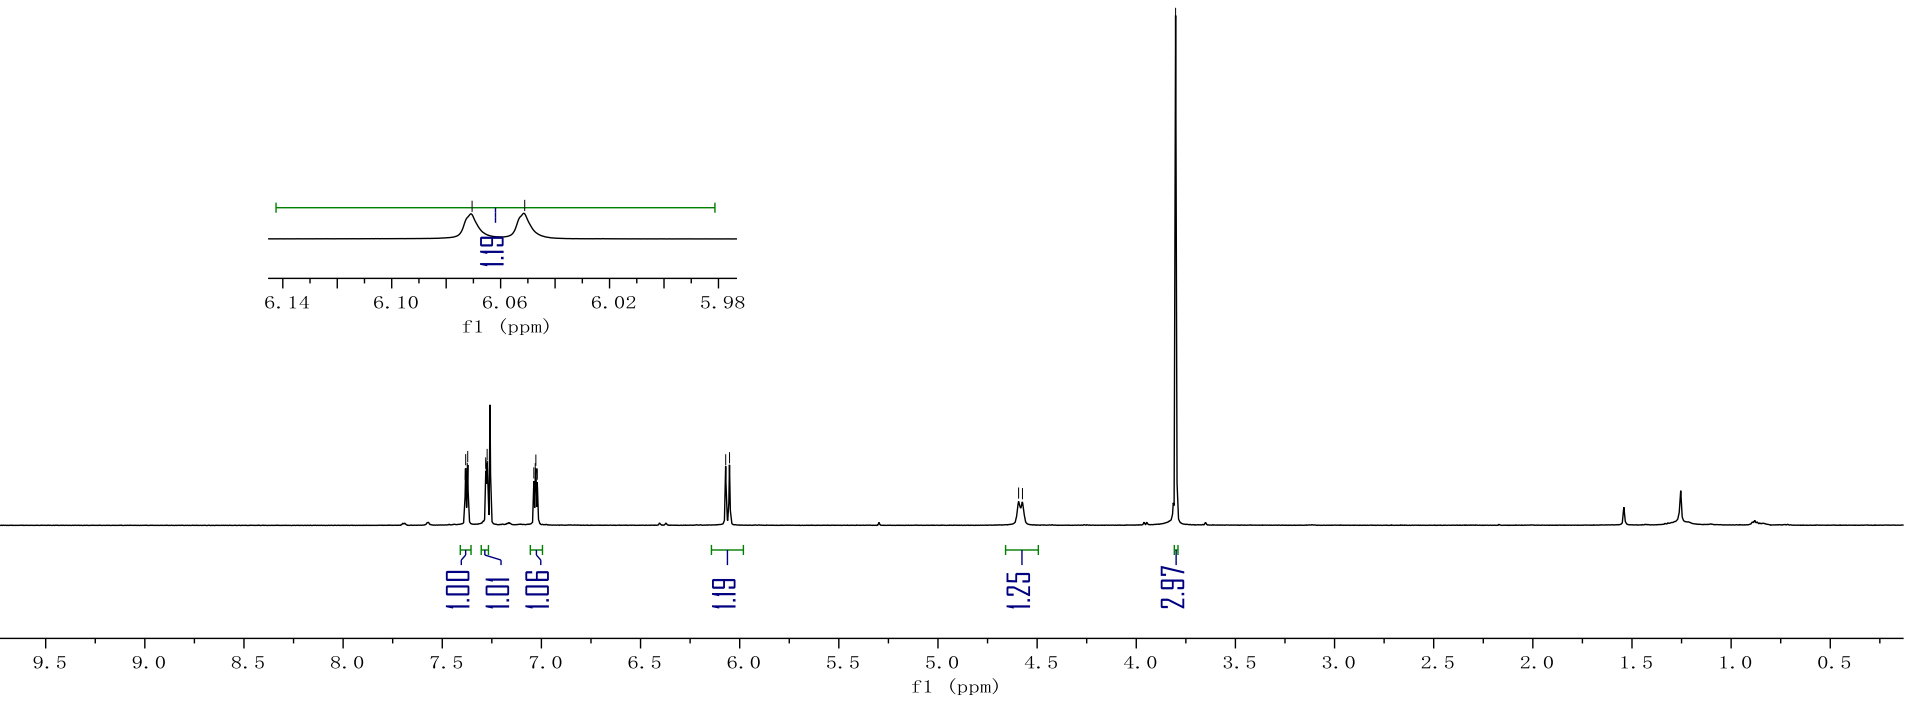

# <sup>13</sup>C NMR

153.152  
145.873  
143.821  
138.966  
138.622  
138.496  
136.699  
136.563  
128.225  
127.226  
127.184  
127.139  
124.503  
122.331  
120.157  
117.971

99.800  
99.633  
99.520  
99.294

83.168  
77.253  
76.999  
76.915  
76.746

53.054

46.659

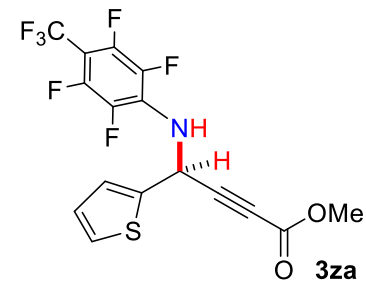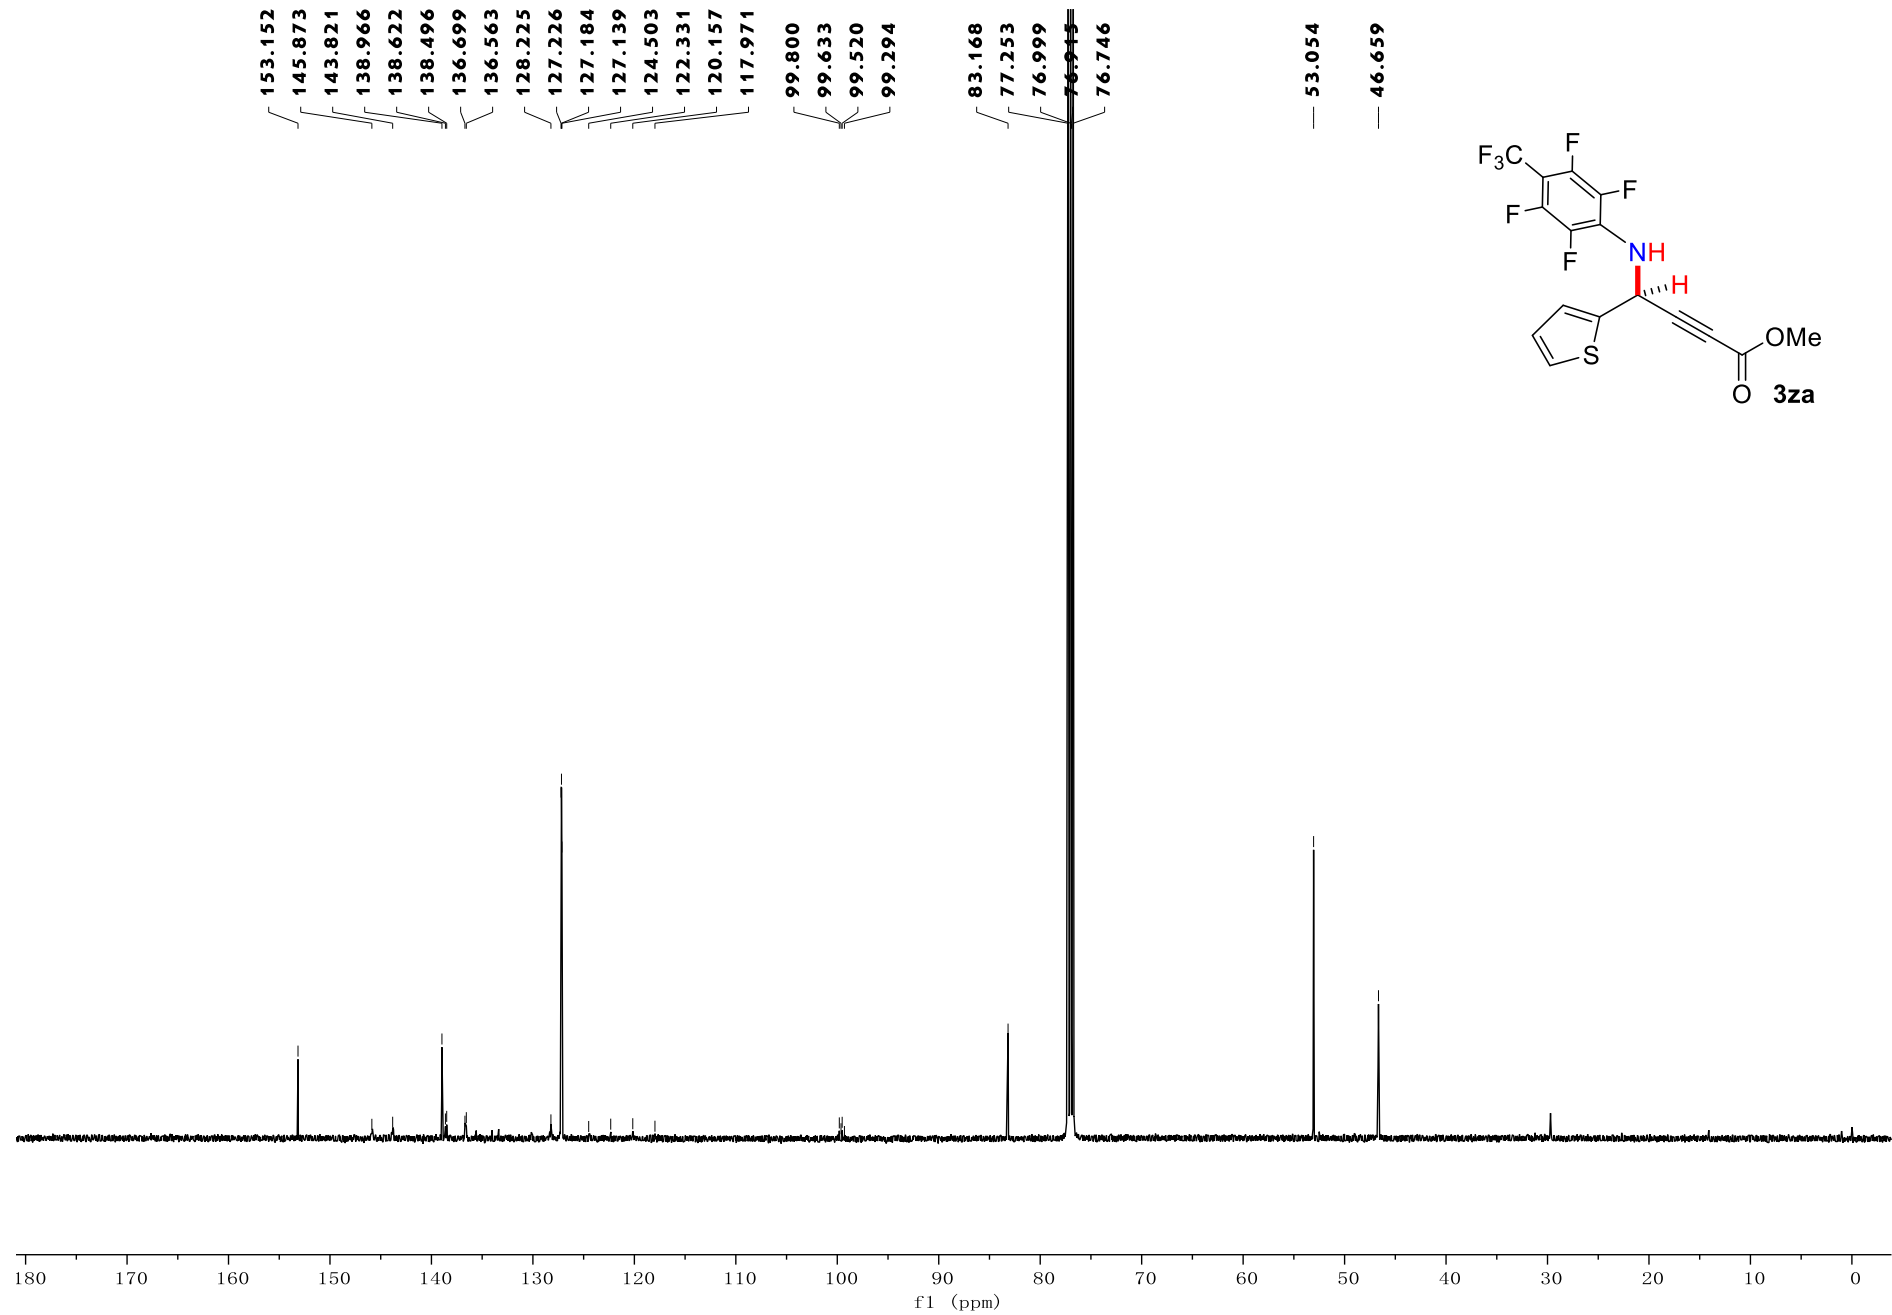

# $^{19}\text{F}$ NMR

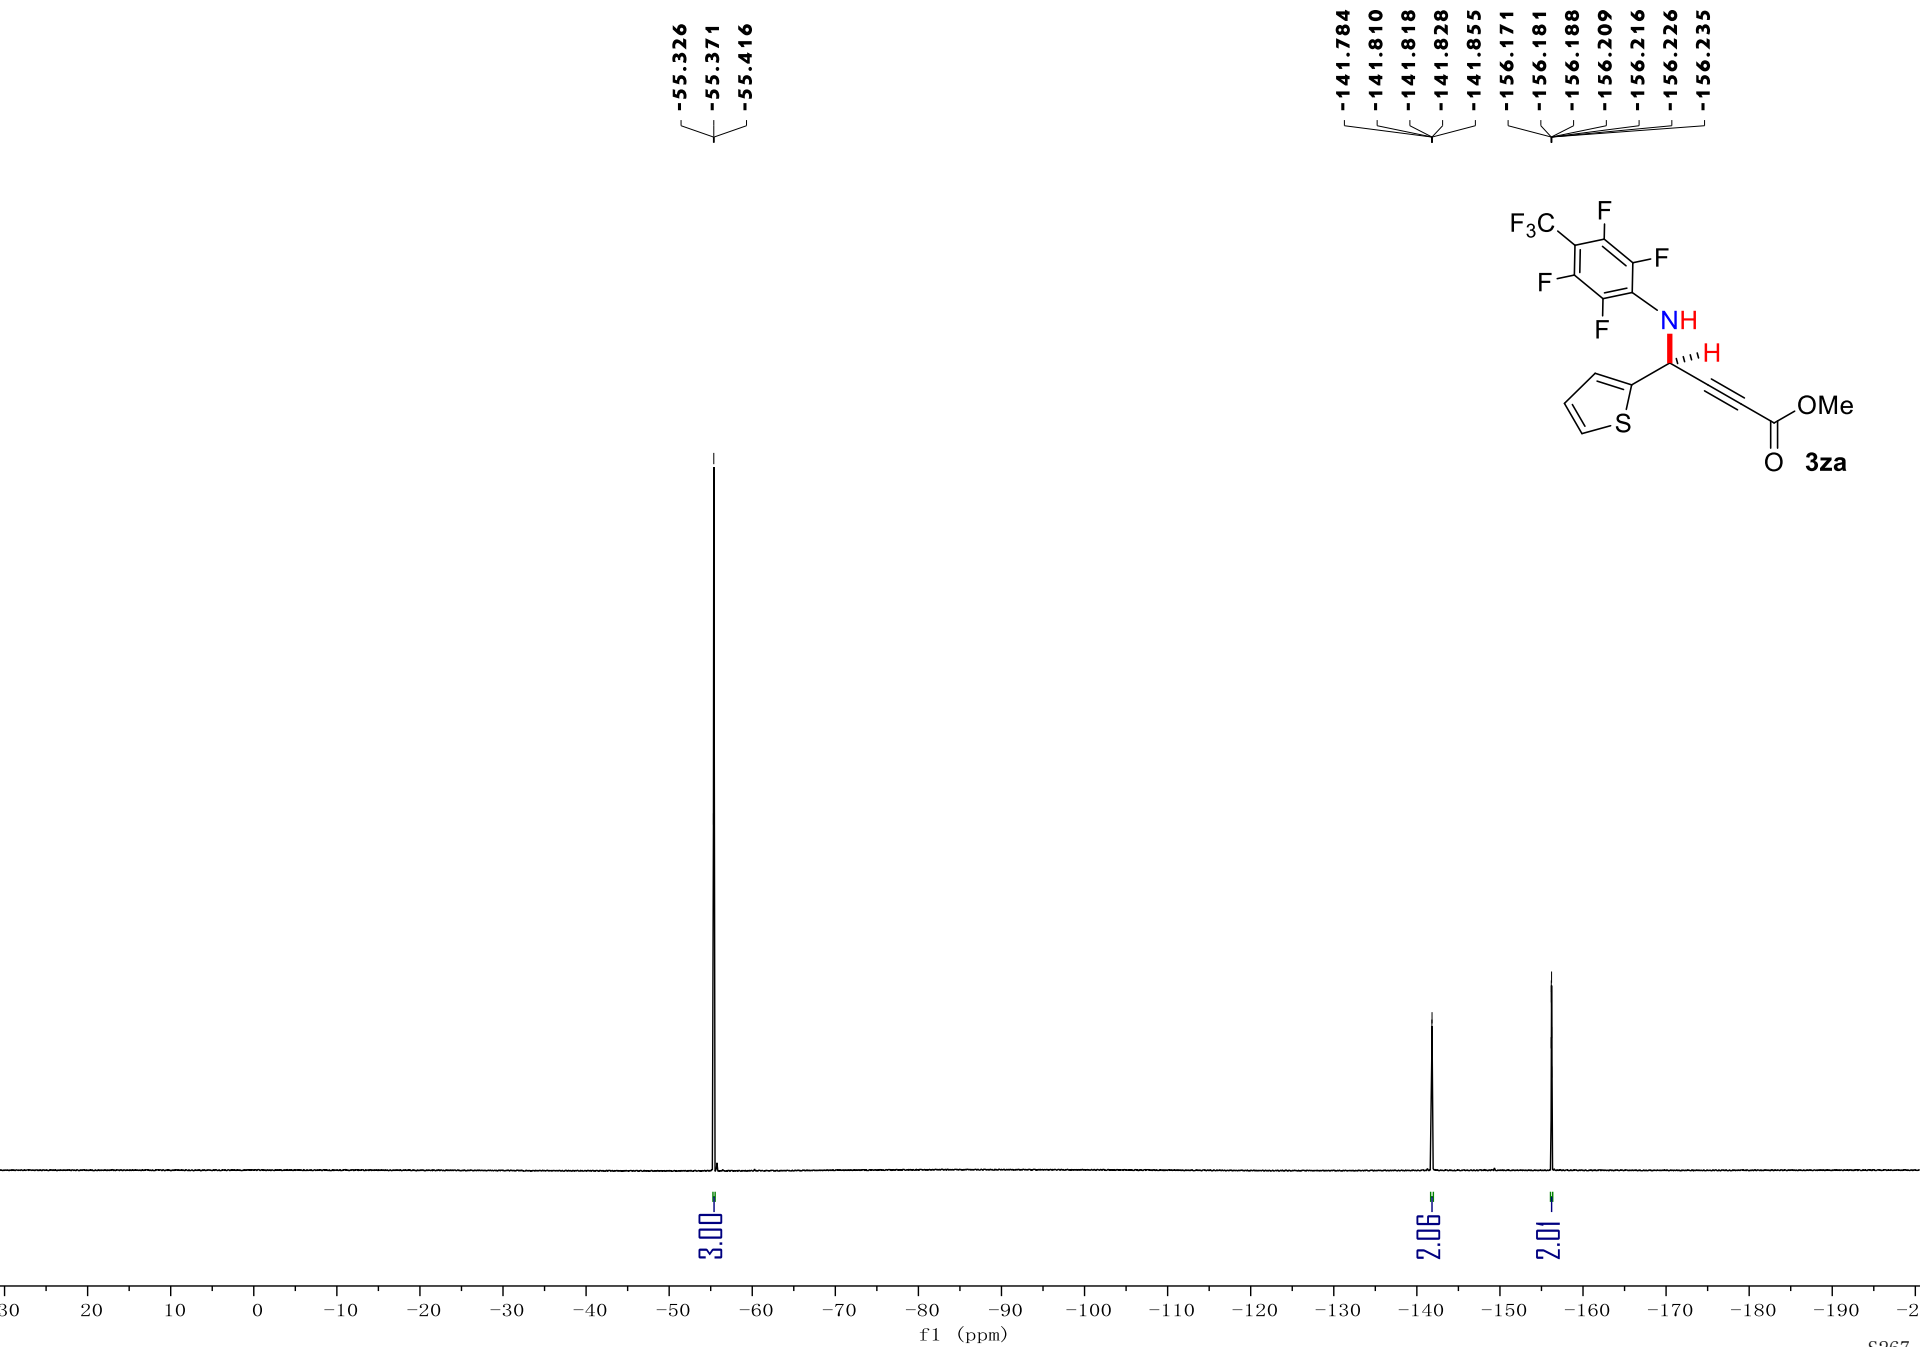

# HPLC

## Sample Information

Sample Name : POX0768-ODH-5%-0.8  
Sample ID : POX0768-ODH-5%-0.8  
Data File : POX0768-ODH-5%-0.8.lcd  
Method File : POX-5.0%-0.8ml.lcm

## Chromatogram

mAU

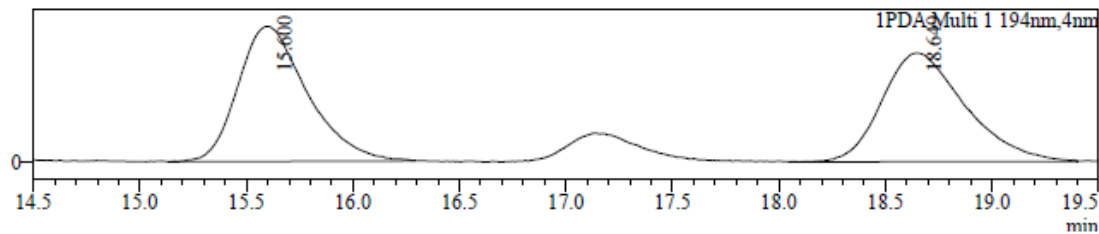

UV Spectrum

Retention time = 15.600

mAU

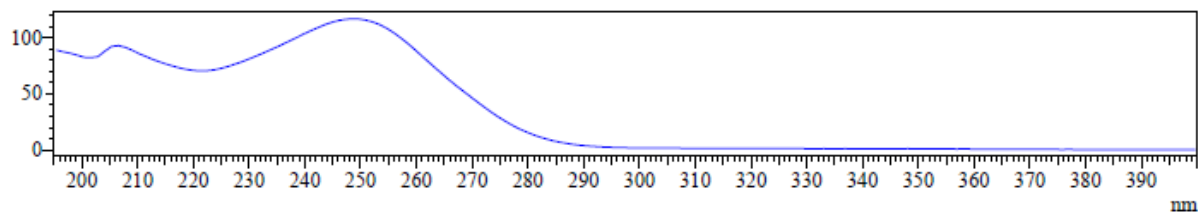

UV Spectrum

Retention time = 18.649

mAU

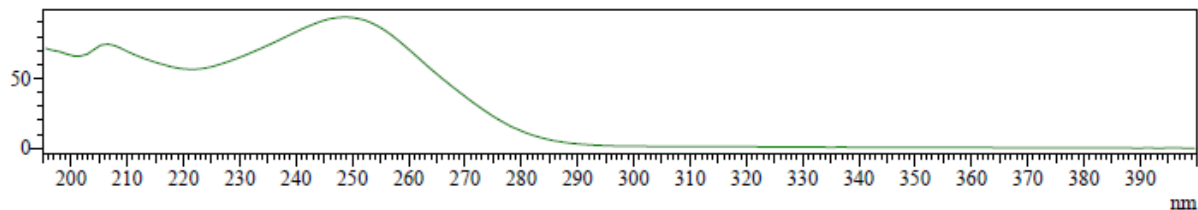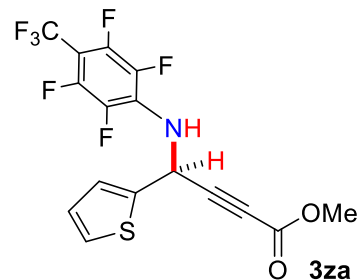

## Peak Table

PDA Ch1 194nm

| Peak# | Ret. Time | Area    | Area%   |
|-------|-----------|---------|---------|
| 1     | 15.600    | 2006994 | 50.817  |
| 2     | 18.649    | 1942426 | 49.183  |
| Total |           | 3949419 | 100.000 |



# HPLC

## Sample Information

Sample Name : P0X-0769-ODH-5%-0.8  
Sample ID : P0X-0769-ODH-5%-0.8  
Data File : P0X-0769-ODH-5%-0.8.lcd  
Method File : P0X-5.0%-0.8ml.lcm

## Chromatogram

mAU

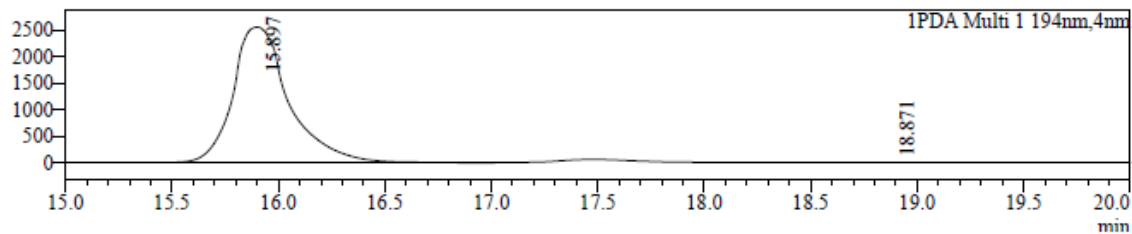

UV Spectrum  
Retention time = 15.897

mAU

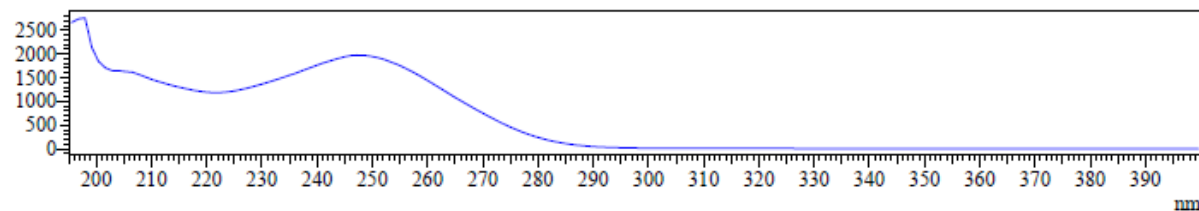

UV Spectrum  
Retention time = 18.871

mAU

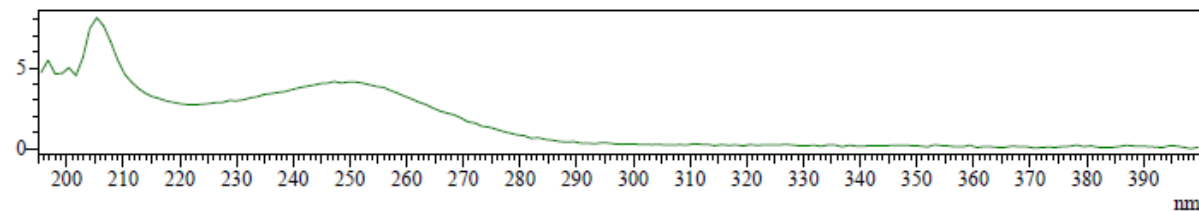

## Peak Table

PDA Ch1 194nm

| Peak# | Ret. Time | Area     | Area%   |
|-------|-----------|----------|---------|
| 1     | 15.897    | 46609958 | 99.862  |
| 2     | 18.871    | 64216    | 0.138   |
| Total |           | 46674174 | 100.000 |

# $^1\text{H}$ NMR

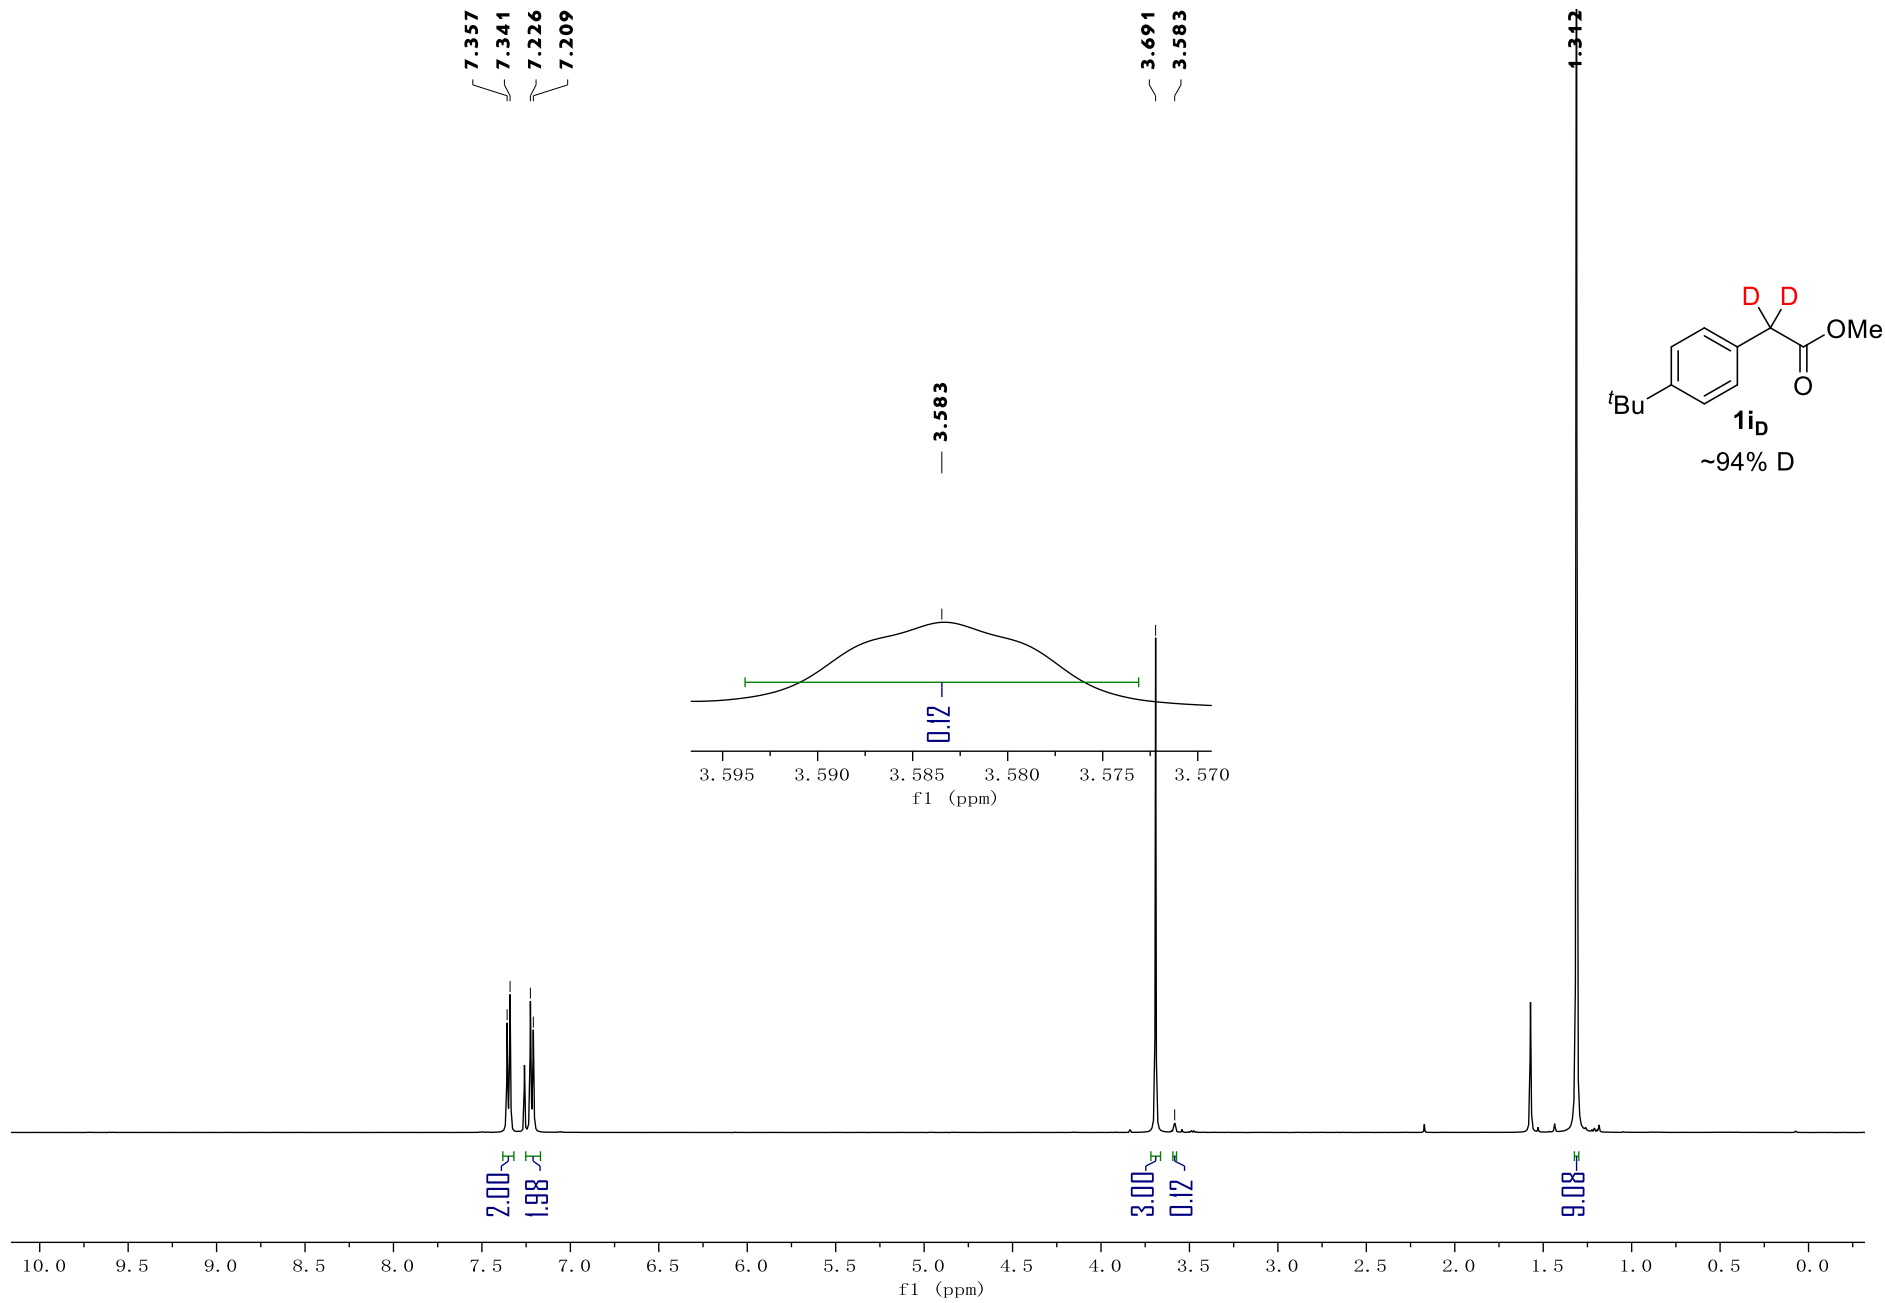

# $^{13}\text{C}$ NMR

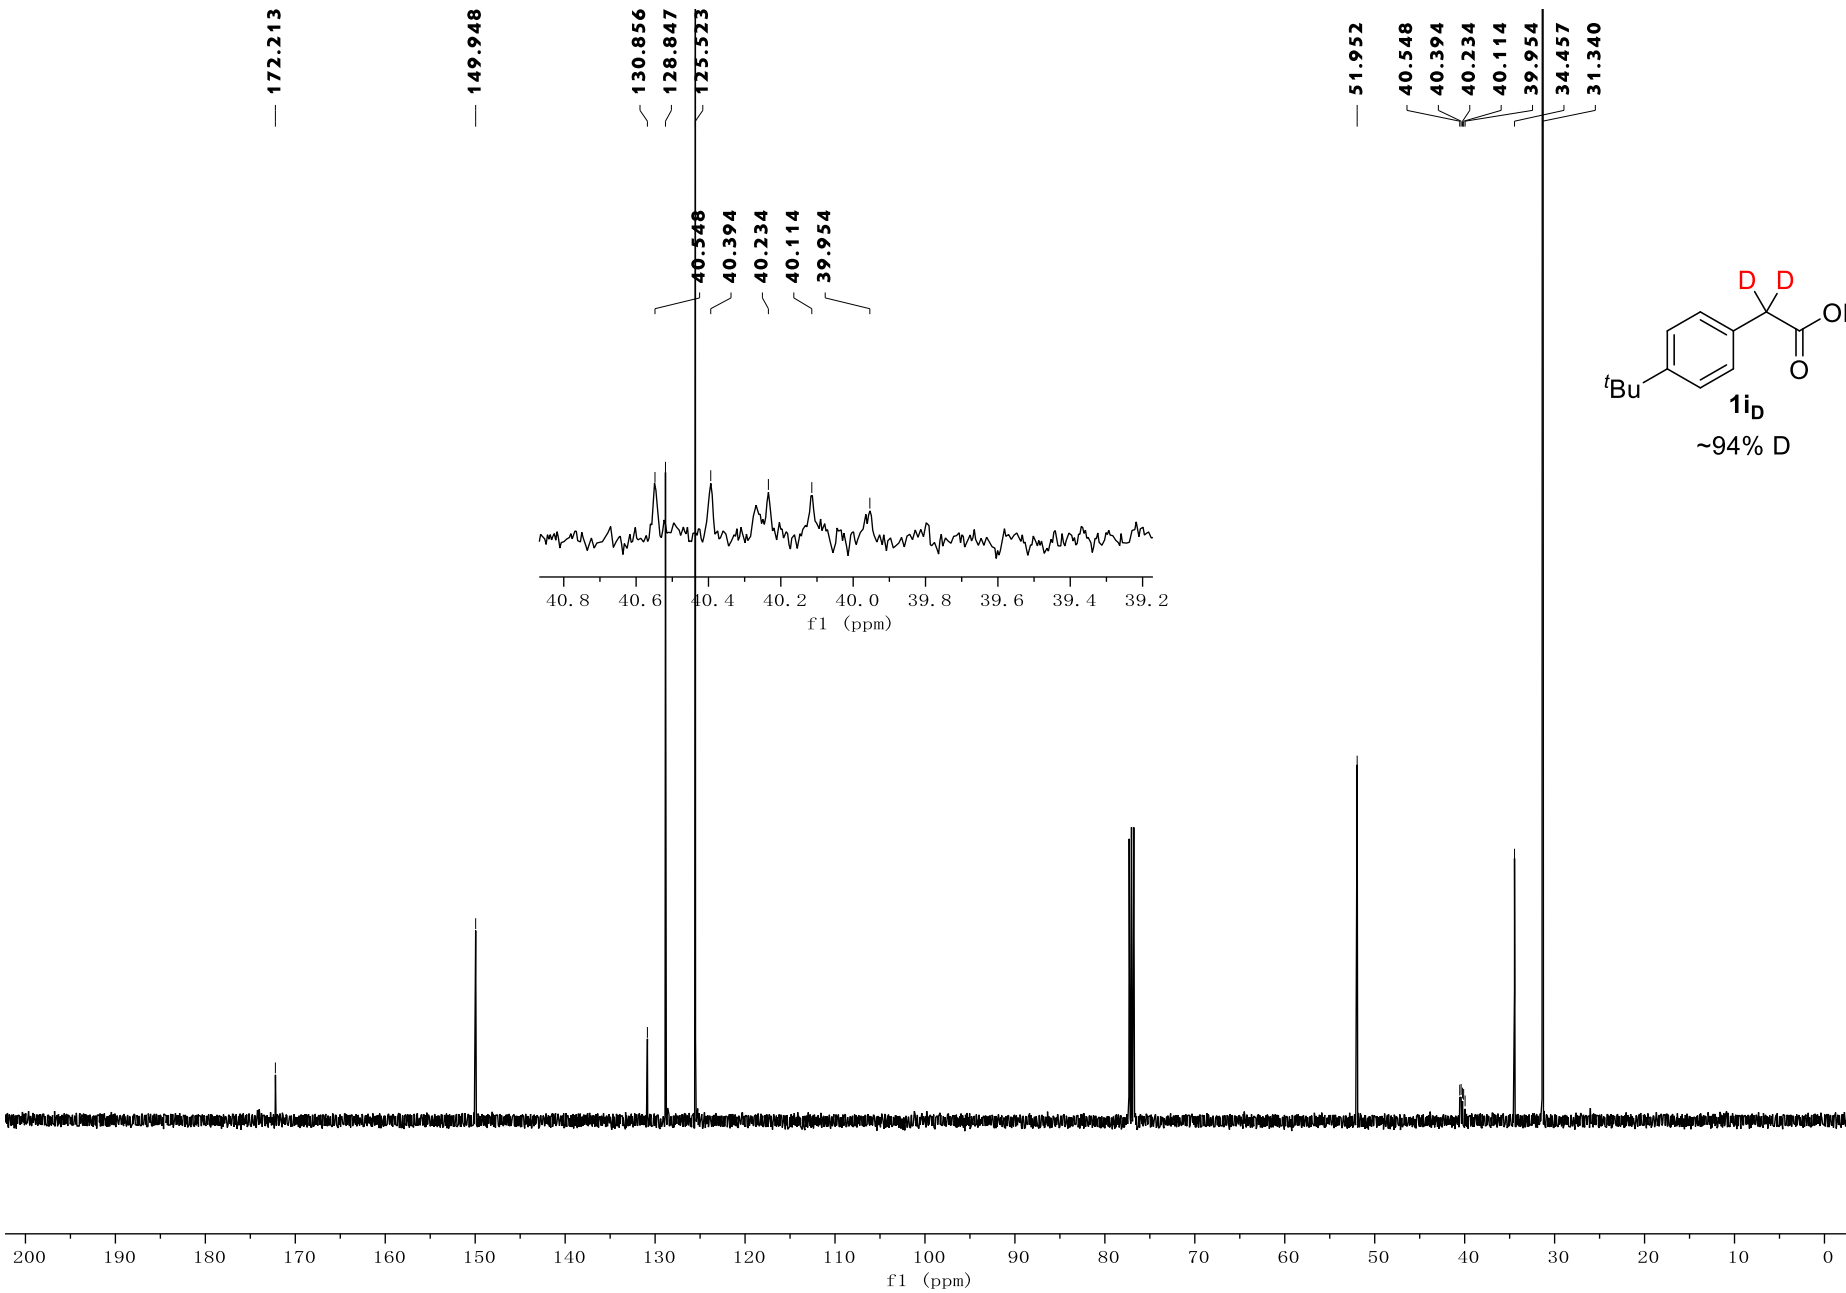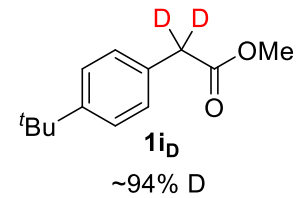

# <sup>1</sup>H NMR

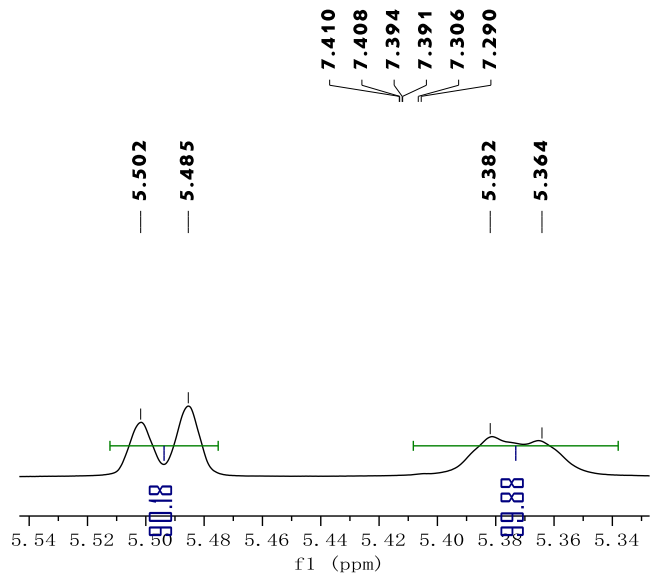

$$\text{KIE} = \frac{90.18}{9.82} \times \frac{94}{106} = 8.1$$

5.502  
5.485  
5.382  
5.364

3.773

1.322

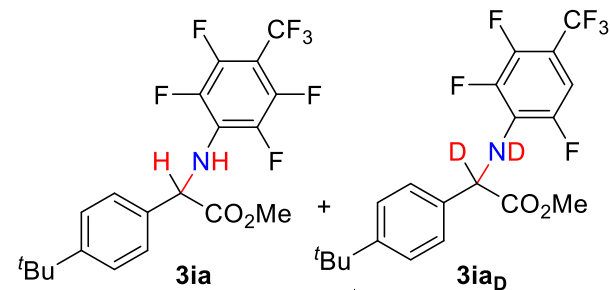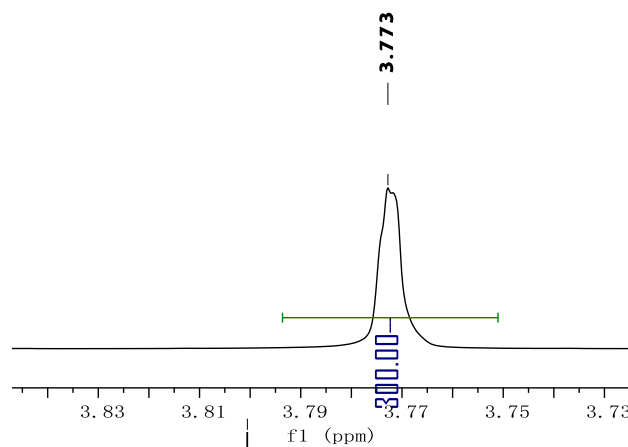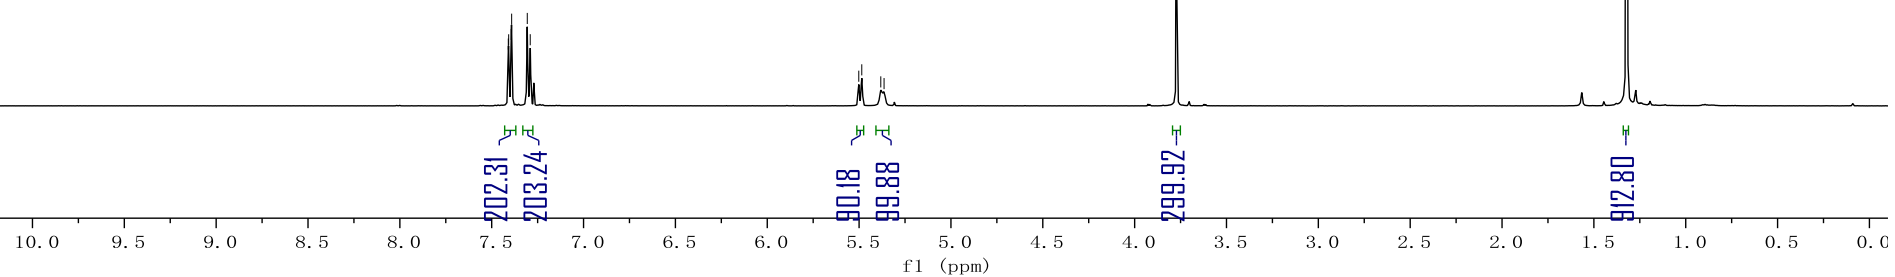

# <sup>1</sup>H NMR

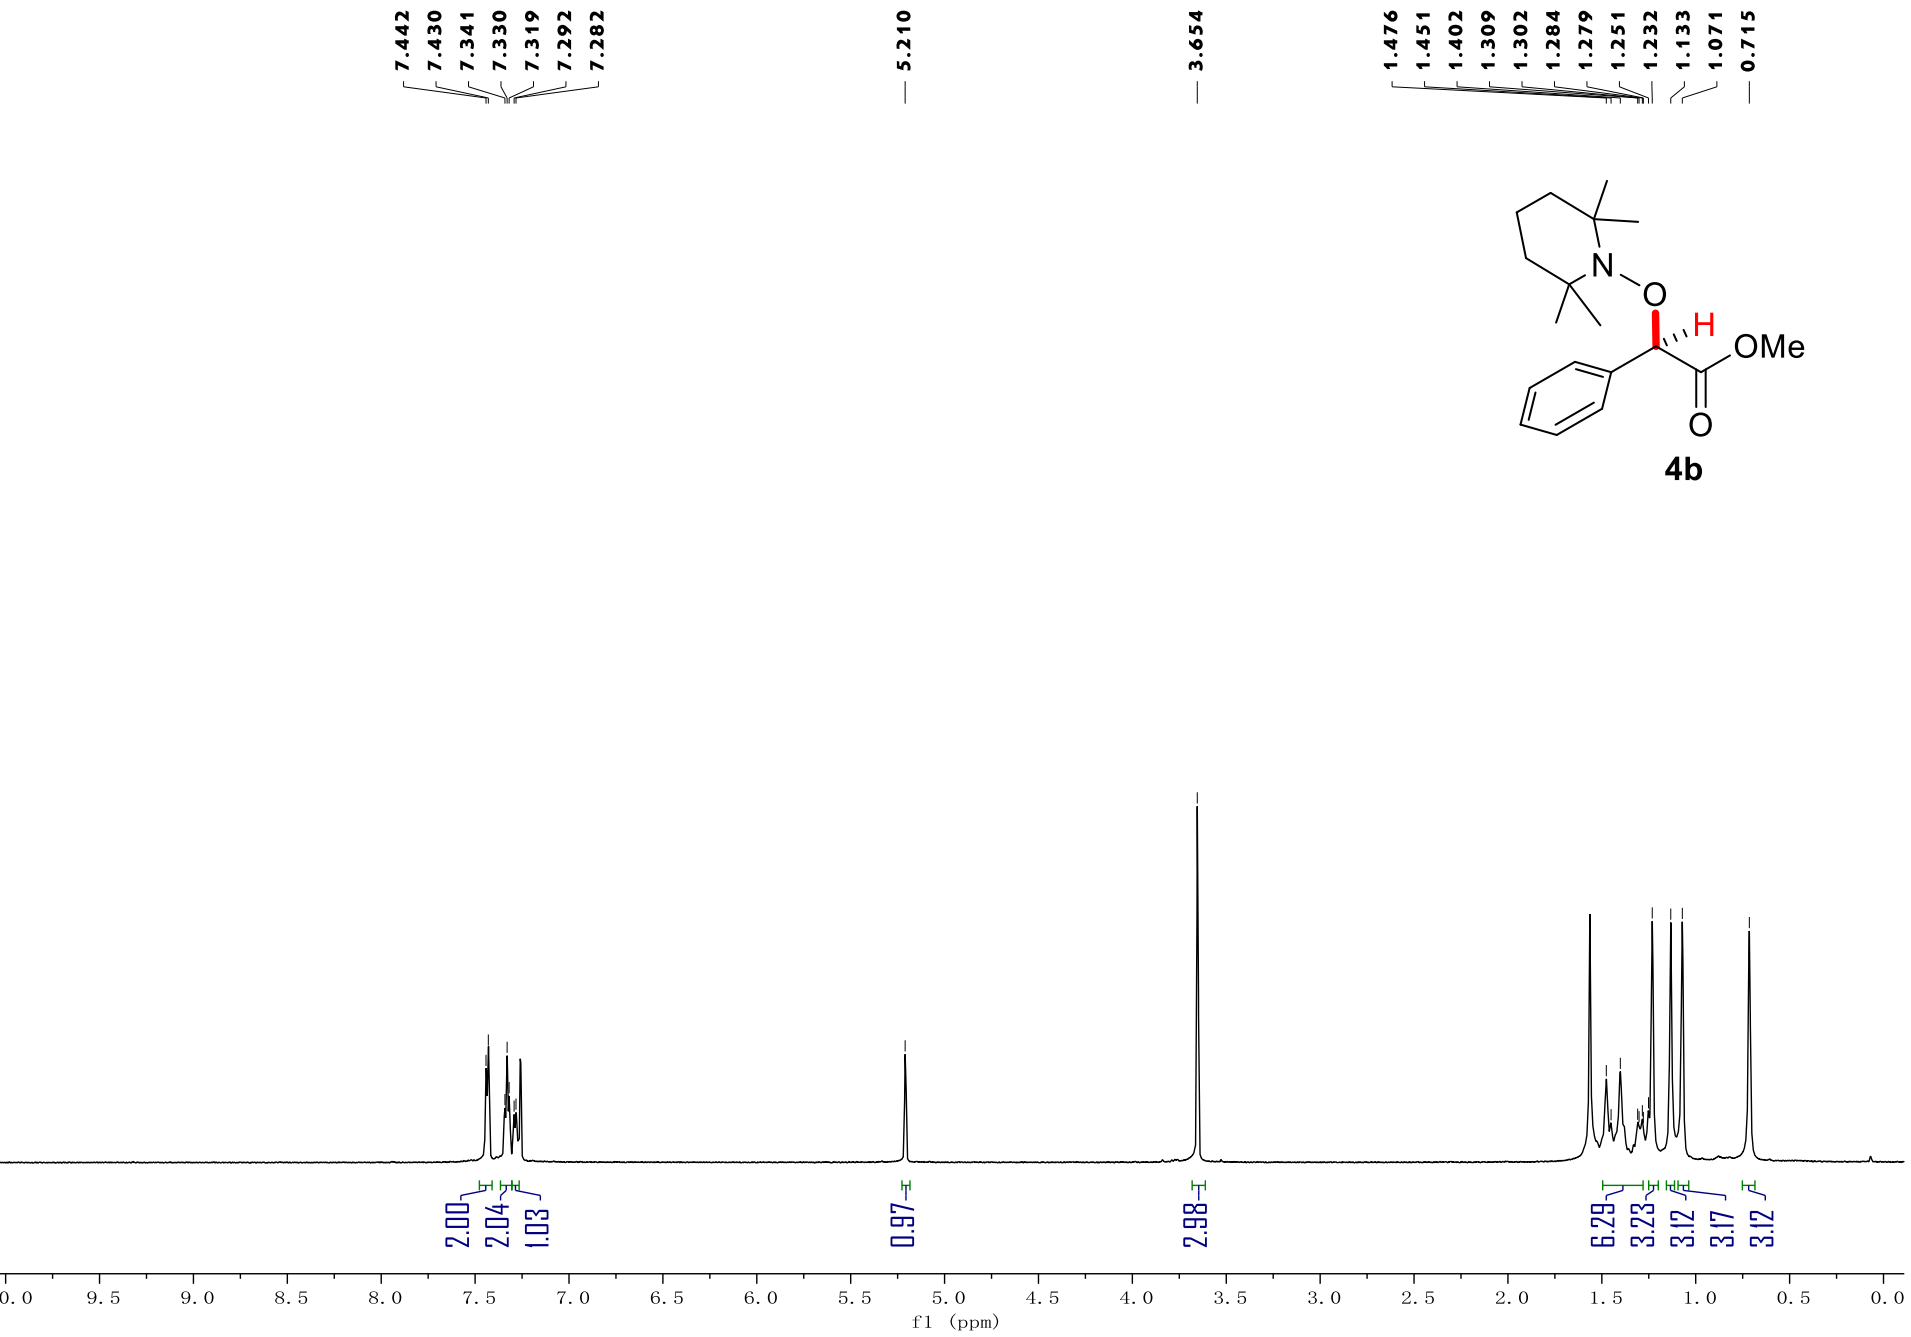

<sup>13</sup>C NMR

— 172.445

— 138.144

128.312

127.928

126.866

— 88.570

— 59.888

— 51.824

40.214

40.079

33.531

32.836

— 20.133

— 17.069

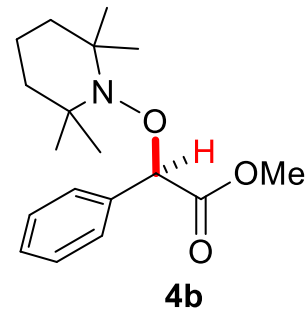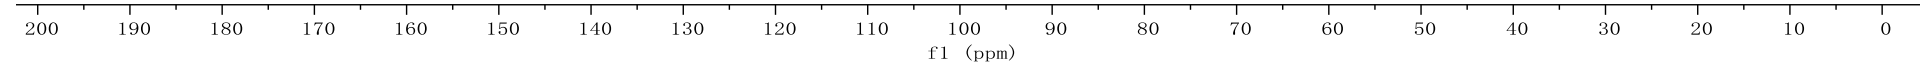

# <sup>1</sup>H NMR

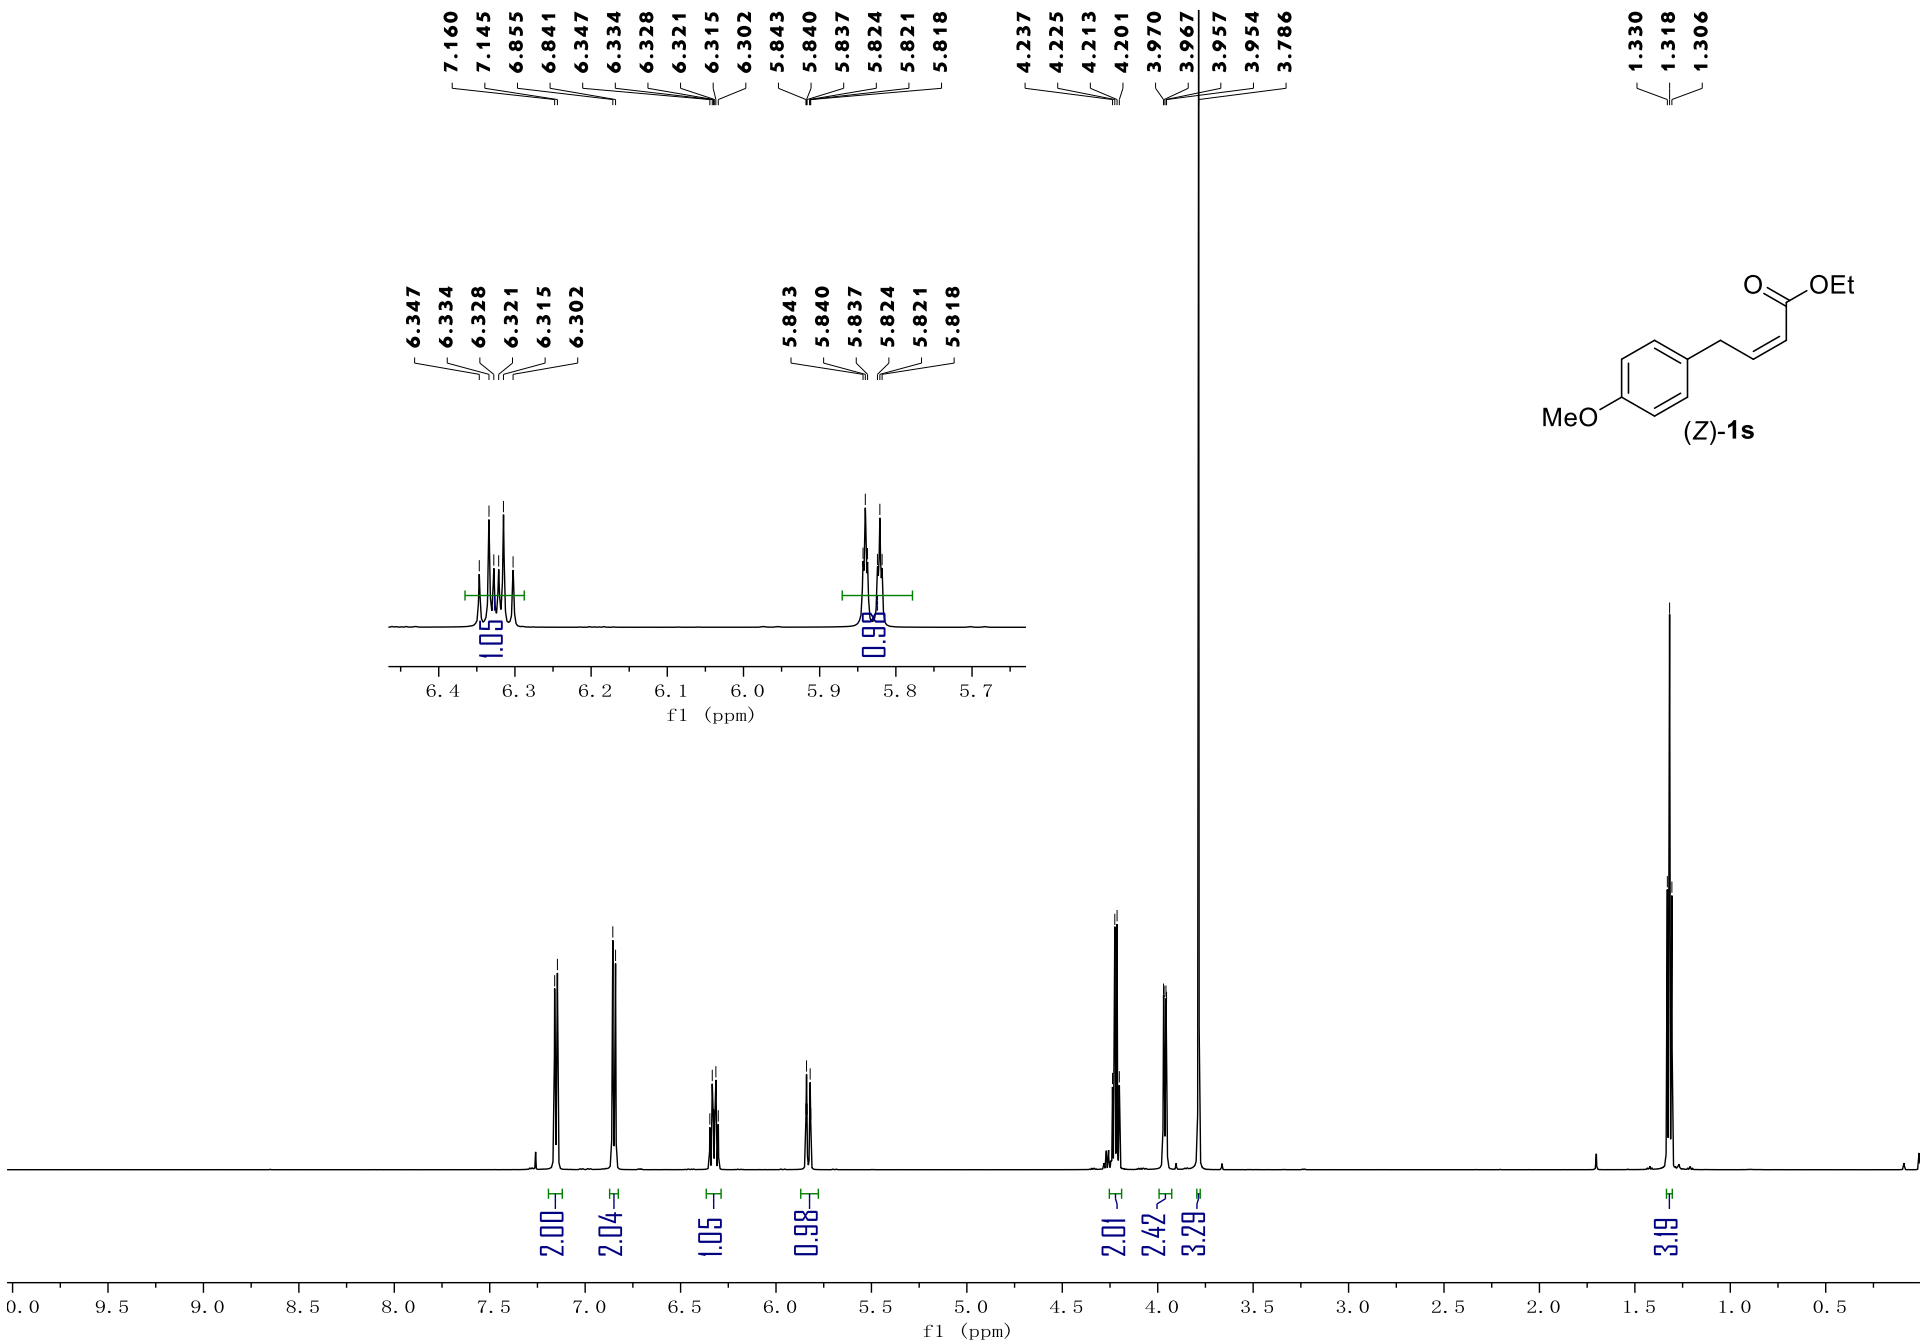

<sup>13</sup>C NMR

— 166.345

— 158.113

— 148.309

— 131.437

— 129.490

— 129.480

— 119.517

— 113.972

— 59.902

— 55.187

— 34.184

— 14.231

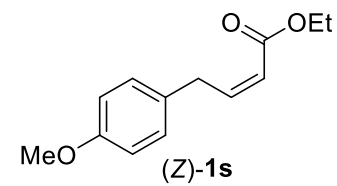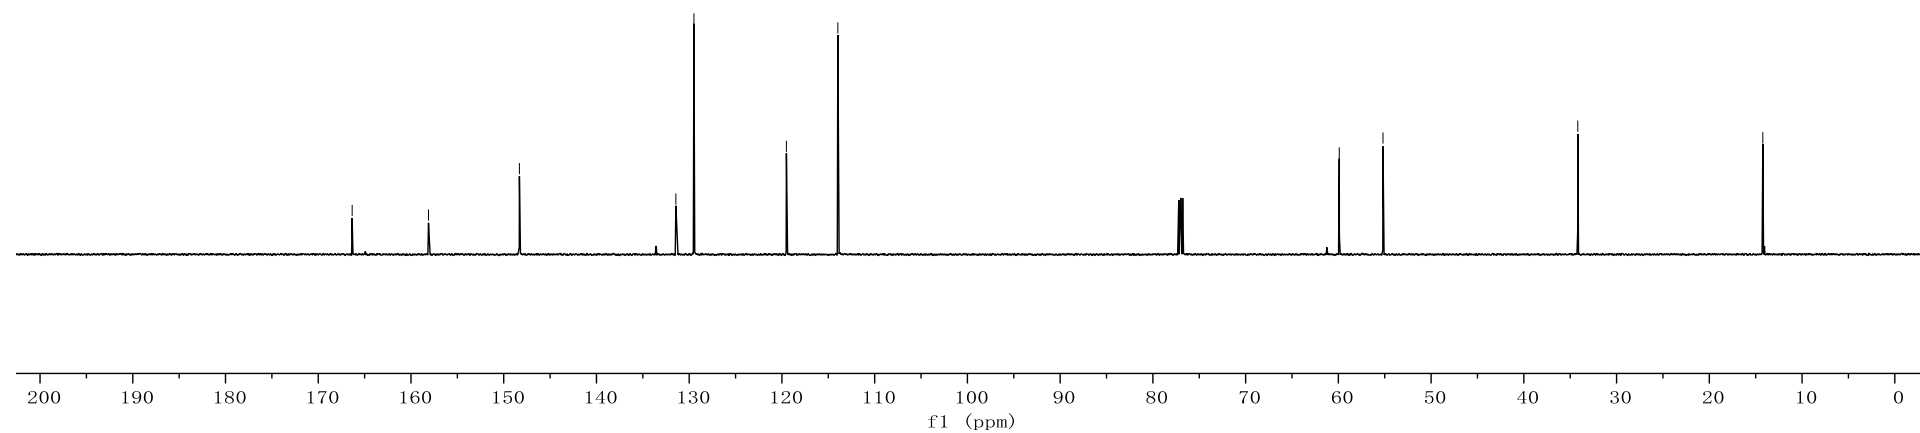



# <sup>1</sup>H NMR

7.366  
7.349  
6.925  
6.907  
6.665  
6.647  
6.629  
6.332  
6.314  
6.309  
6.291  
5.937  
5.935  
5.914  
5.912

4.652  
4.635  
4.255  
4.248  
4.241  
4.237  
4.234  
4.227  
4.223  
4.219  
4.215  
4.208  
4.205  
4.201  
4.194  
4.187  
3.813

1.320  
1.306  
1.291

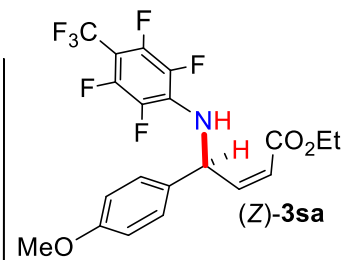

2.01

2.00

0.98

1.00

0.95

0.97

2.04

3.09

3.37

f1 (ppm)

S277

# $^{13}\text{C}$ NMR

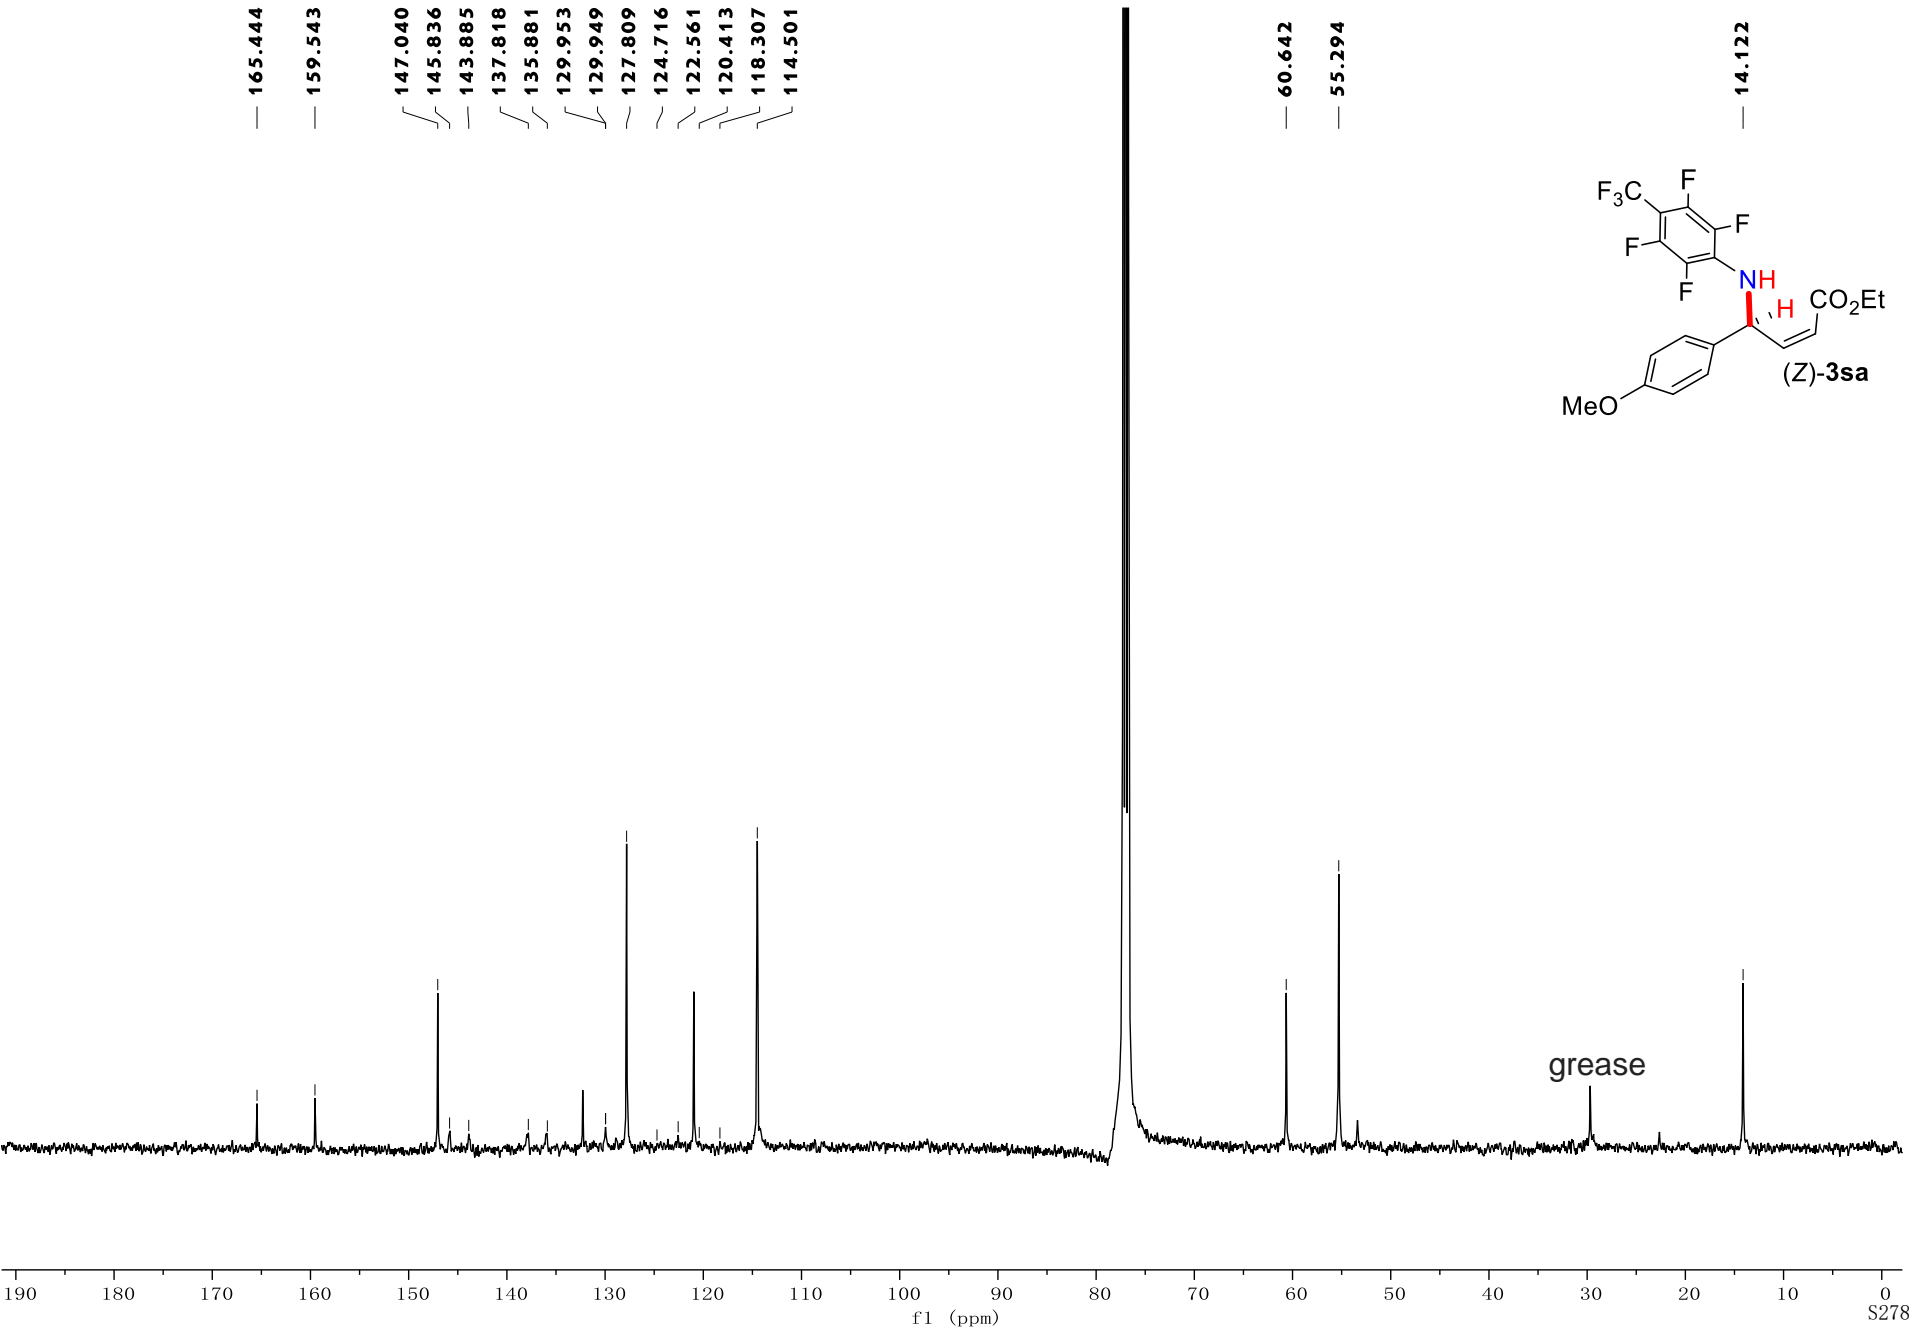

# $^{19}\text{F}$ NMR

-54.985  
-55.030  
-55.074

-142.927  
-142.936  
-142.944  
-142.972  
-142.978  
-142.988  
-143.016  
-143.023  
-143.033  
-157.961  
-157.976  
-158.004  
-158.011  
-158.020  
-158.028

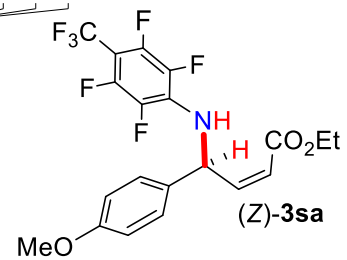

2.94

2.00

1.90

# HPLC

Sample Information  
 Sample Name : POX-0548-2-IA5%-0.8mL.lcd  
 Sample ID : POX-0548-2-IA5%-0.8mL.lcd  
 Data File : POX-0548-2-IA5%-0.8mL.lcd  
 Method File : POX-5%.0.8.mL-30min.lcm

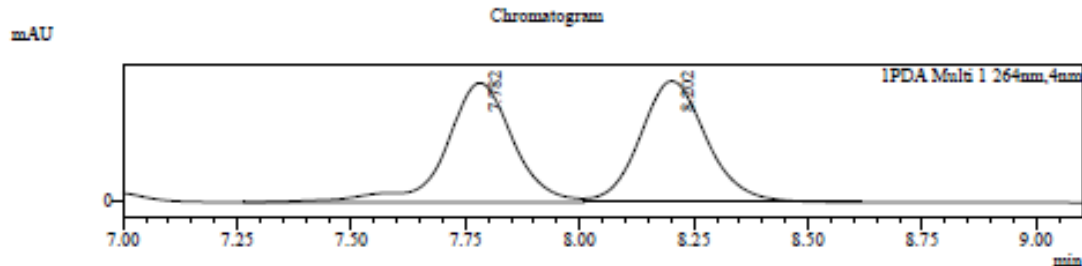

UV Spectrum  
 Retention time = 7.782

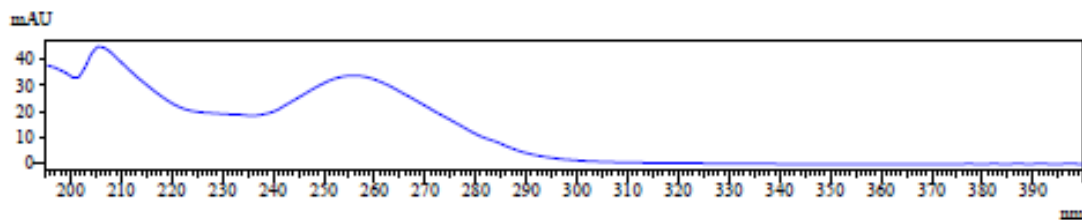

UV Spectrum  
 Retention time = 8.202

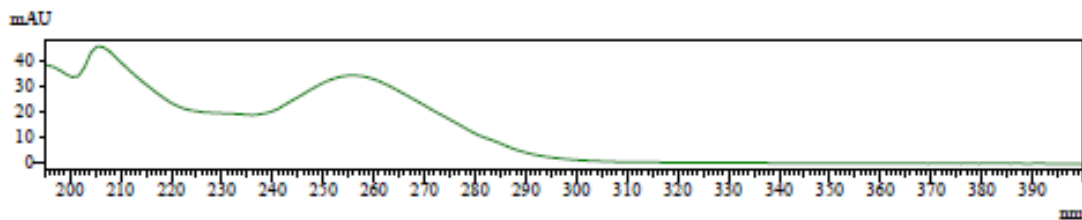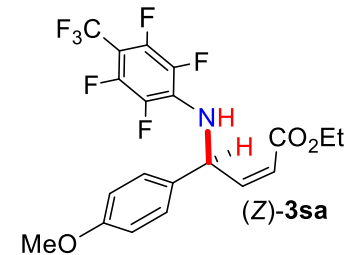

Peak Table

PDA Ch1 264nm

| Peak# | Ret. Time | Area   | Area%   |
|-------|-----------|--------|---------|
| 1     | 7.782     | 297484 | 49.962  |
| 2     | 8.202     | 297940 | 50.038  |
| Total |           | 595424 | 100.000 |

# HPLC

Sample Information  
 Sample Name : POX-1252-2-IA-5%-0.8mL.lcd  
 Sample ID : POX-1252-2-IA-5%-0.8mL.lcd  
 Data File : POX-1252-2-IA-5%-0.8mL.lcd  
 Method File : POX-5%.0.8.mL.-30min.lcm

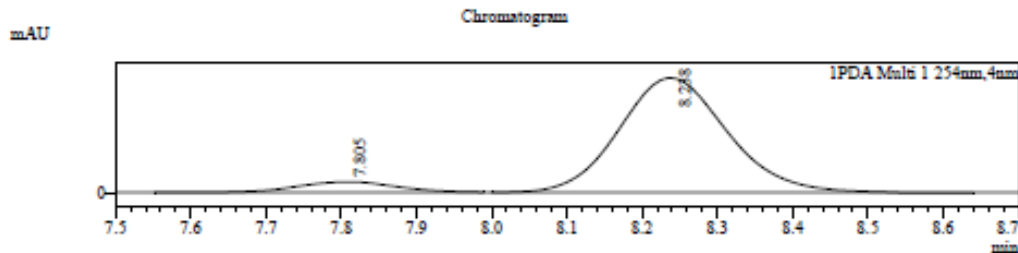

UV Spectrum  
 Retention time = 7.805

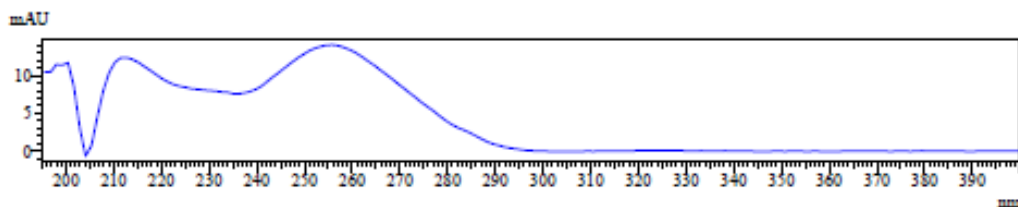

UV Spectrum  
 Retention time = 8.238

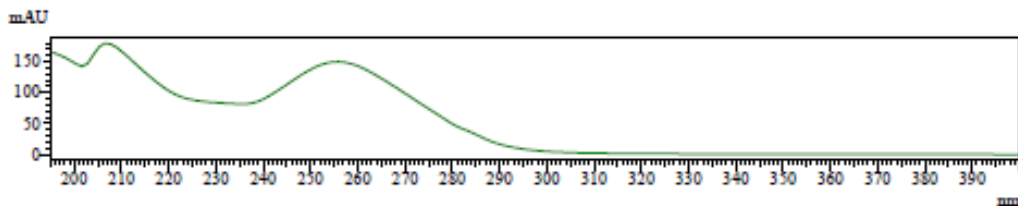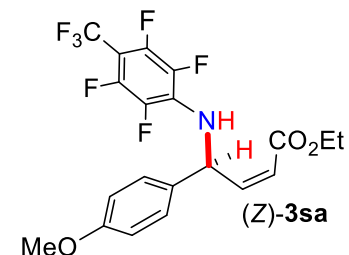

Peak Table

PDA Ch1 254nm

| Peak# | Ret. Time | Area    | Area%   |
|-------|-----------|---------|---------|
| 1     | 7.805     | 122218  | 7.666   |
| 2     | 8.238     | 1471999 | 92.334  |
| Total |           | 1594217 | 100.000 |

# <sup>1</sup>H NMR

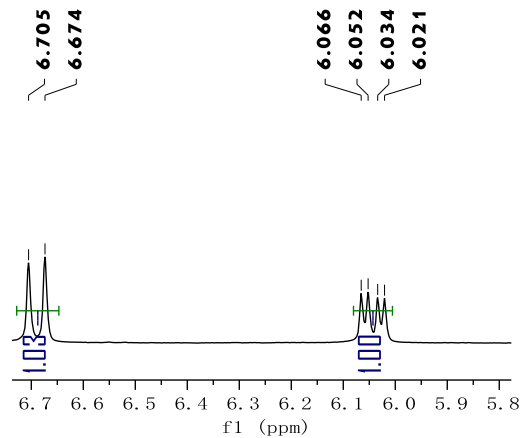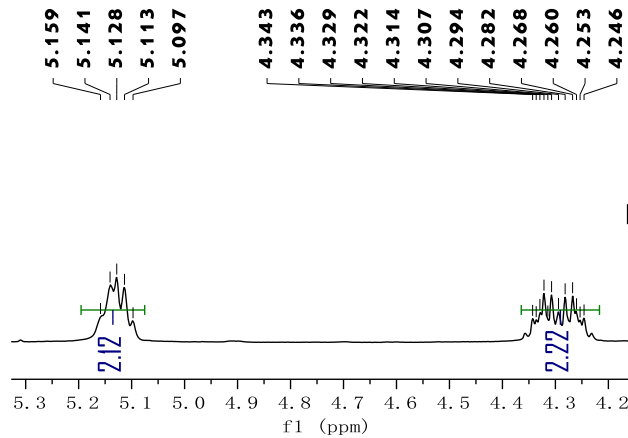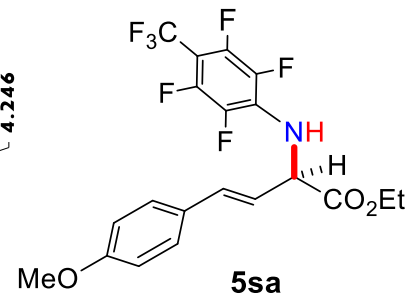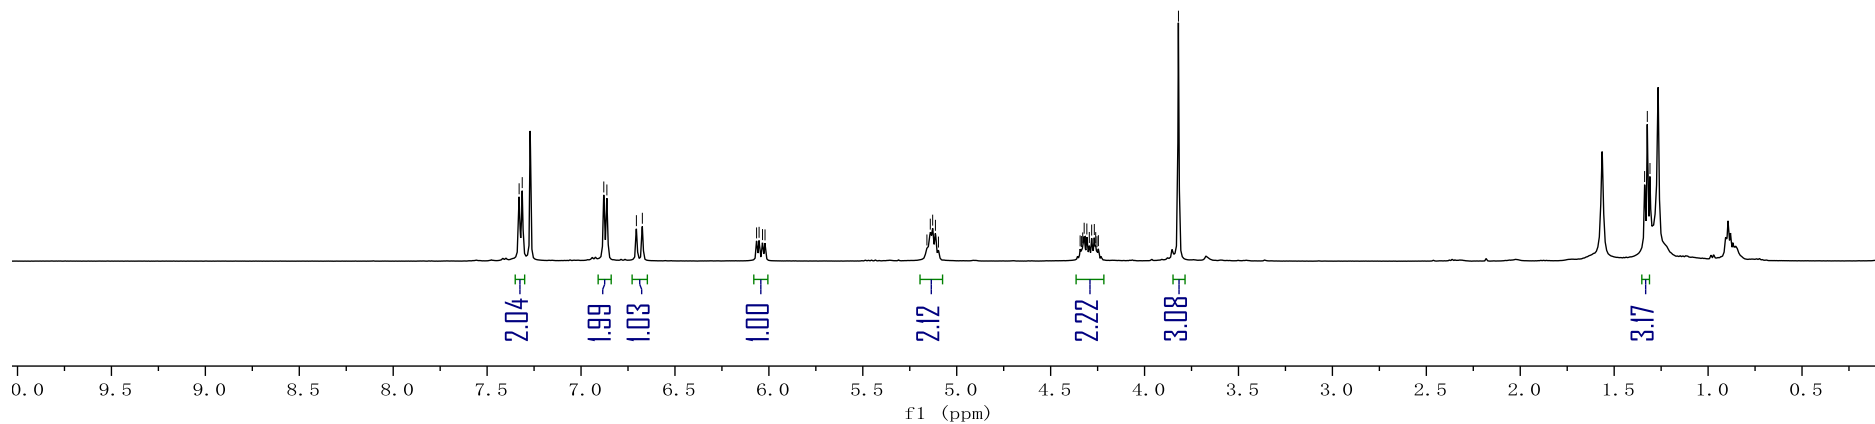

7.330  
7.313  
6.879  
6.862  
6.705  
6.674  
6.066  
6.052  
6.034  
6.021

5.159  
5.141  
5.128  
5.113  
5.097  
4.343  
4.336  
4.329  
4.322  
4.314  
4.307  
4.294  
4.282  
4.268  
4.260  
4.253  
4.246  
3.820

1.338  
1.324  
1.309

# <sup>13</sup>C NMR

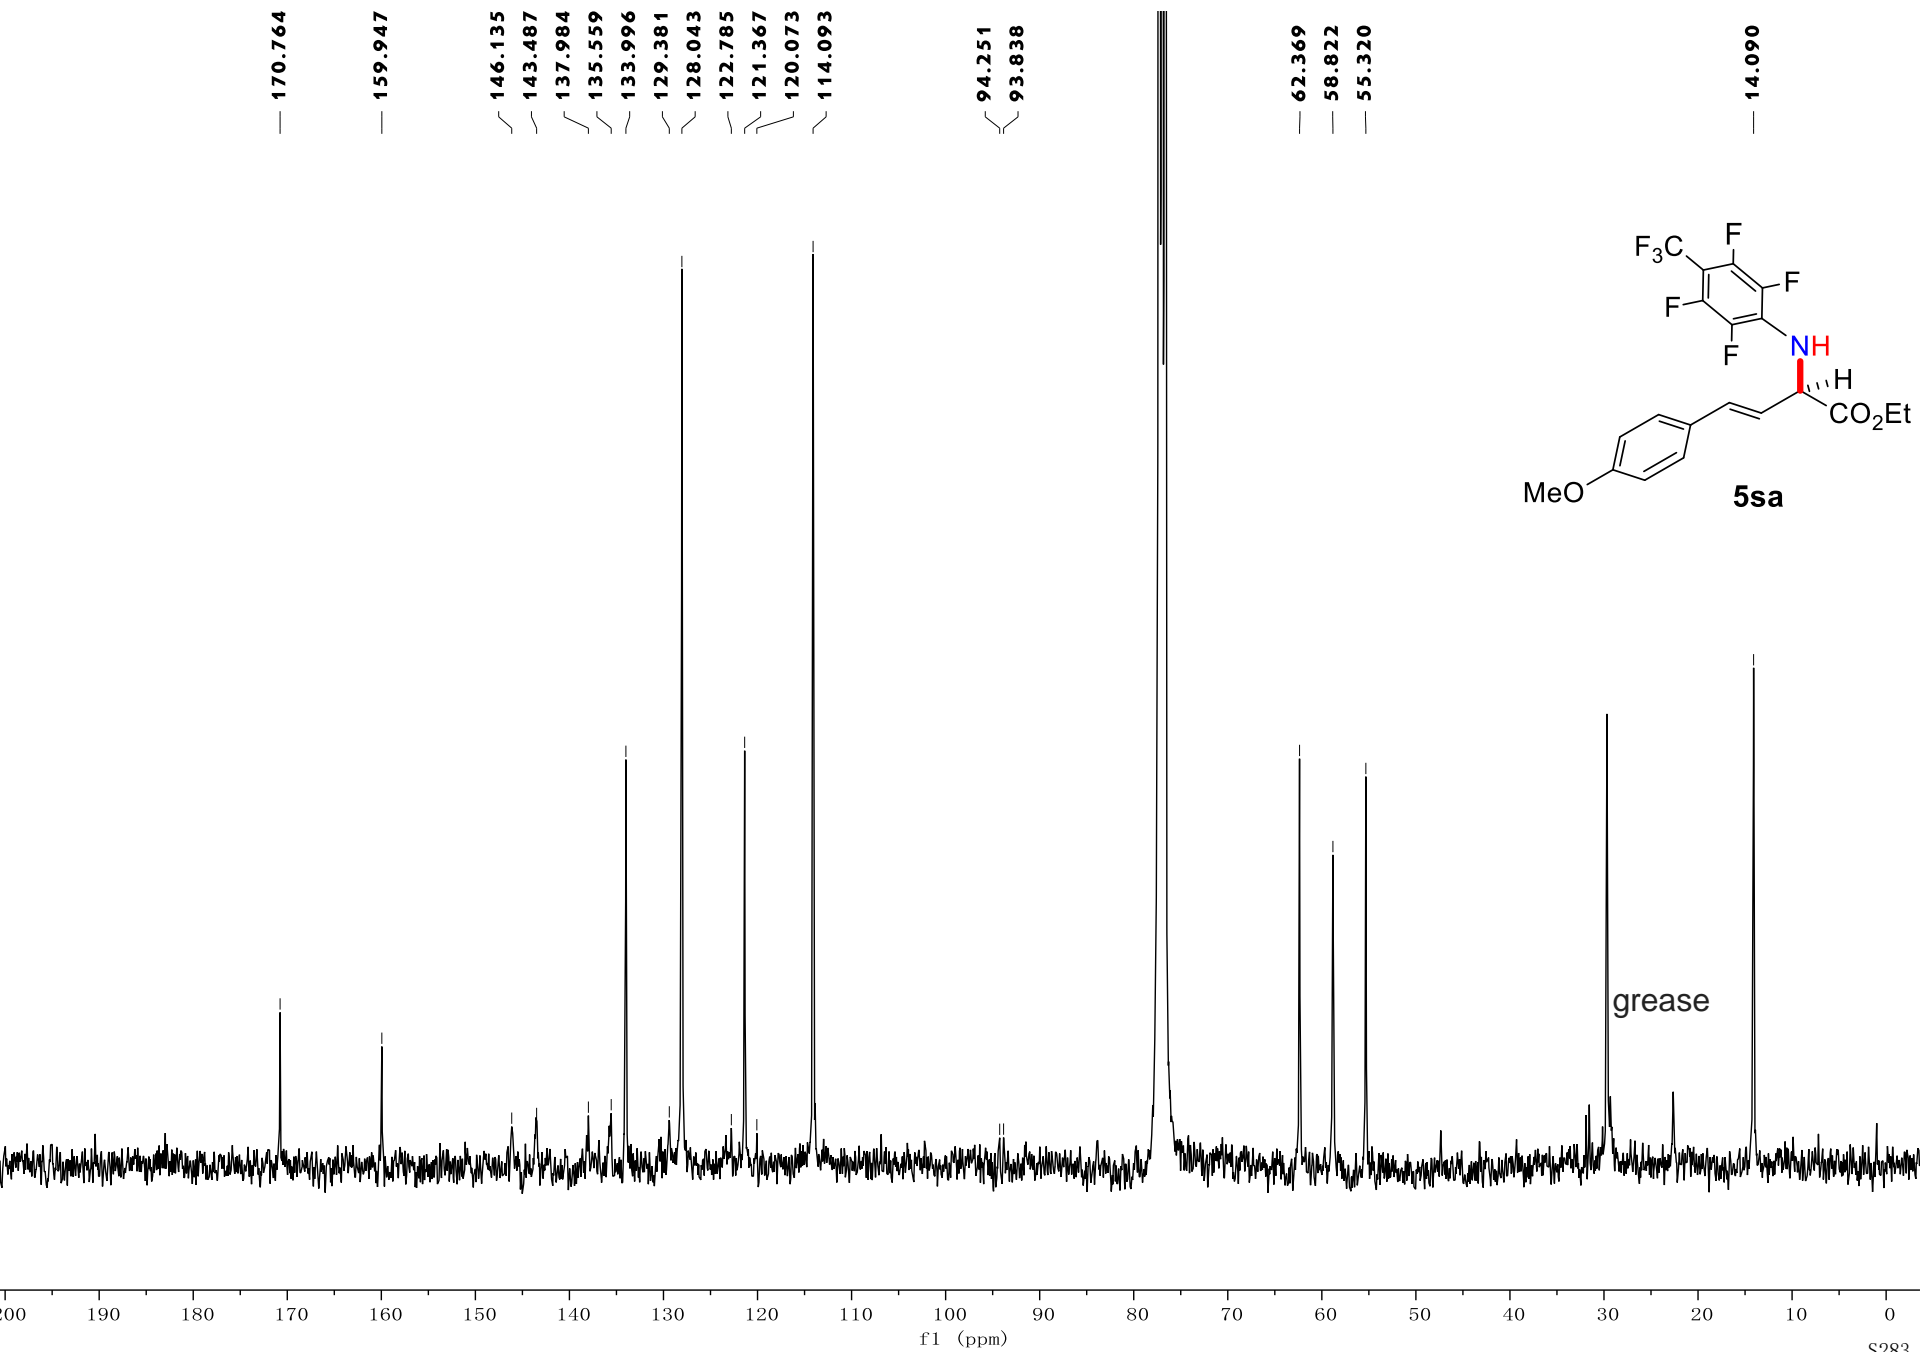

# <sup>19</sup>F NMR

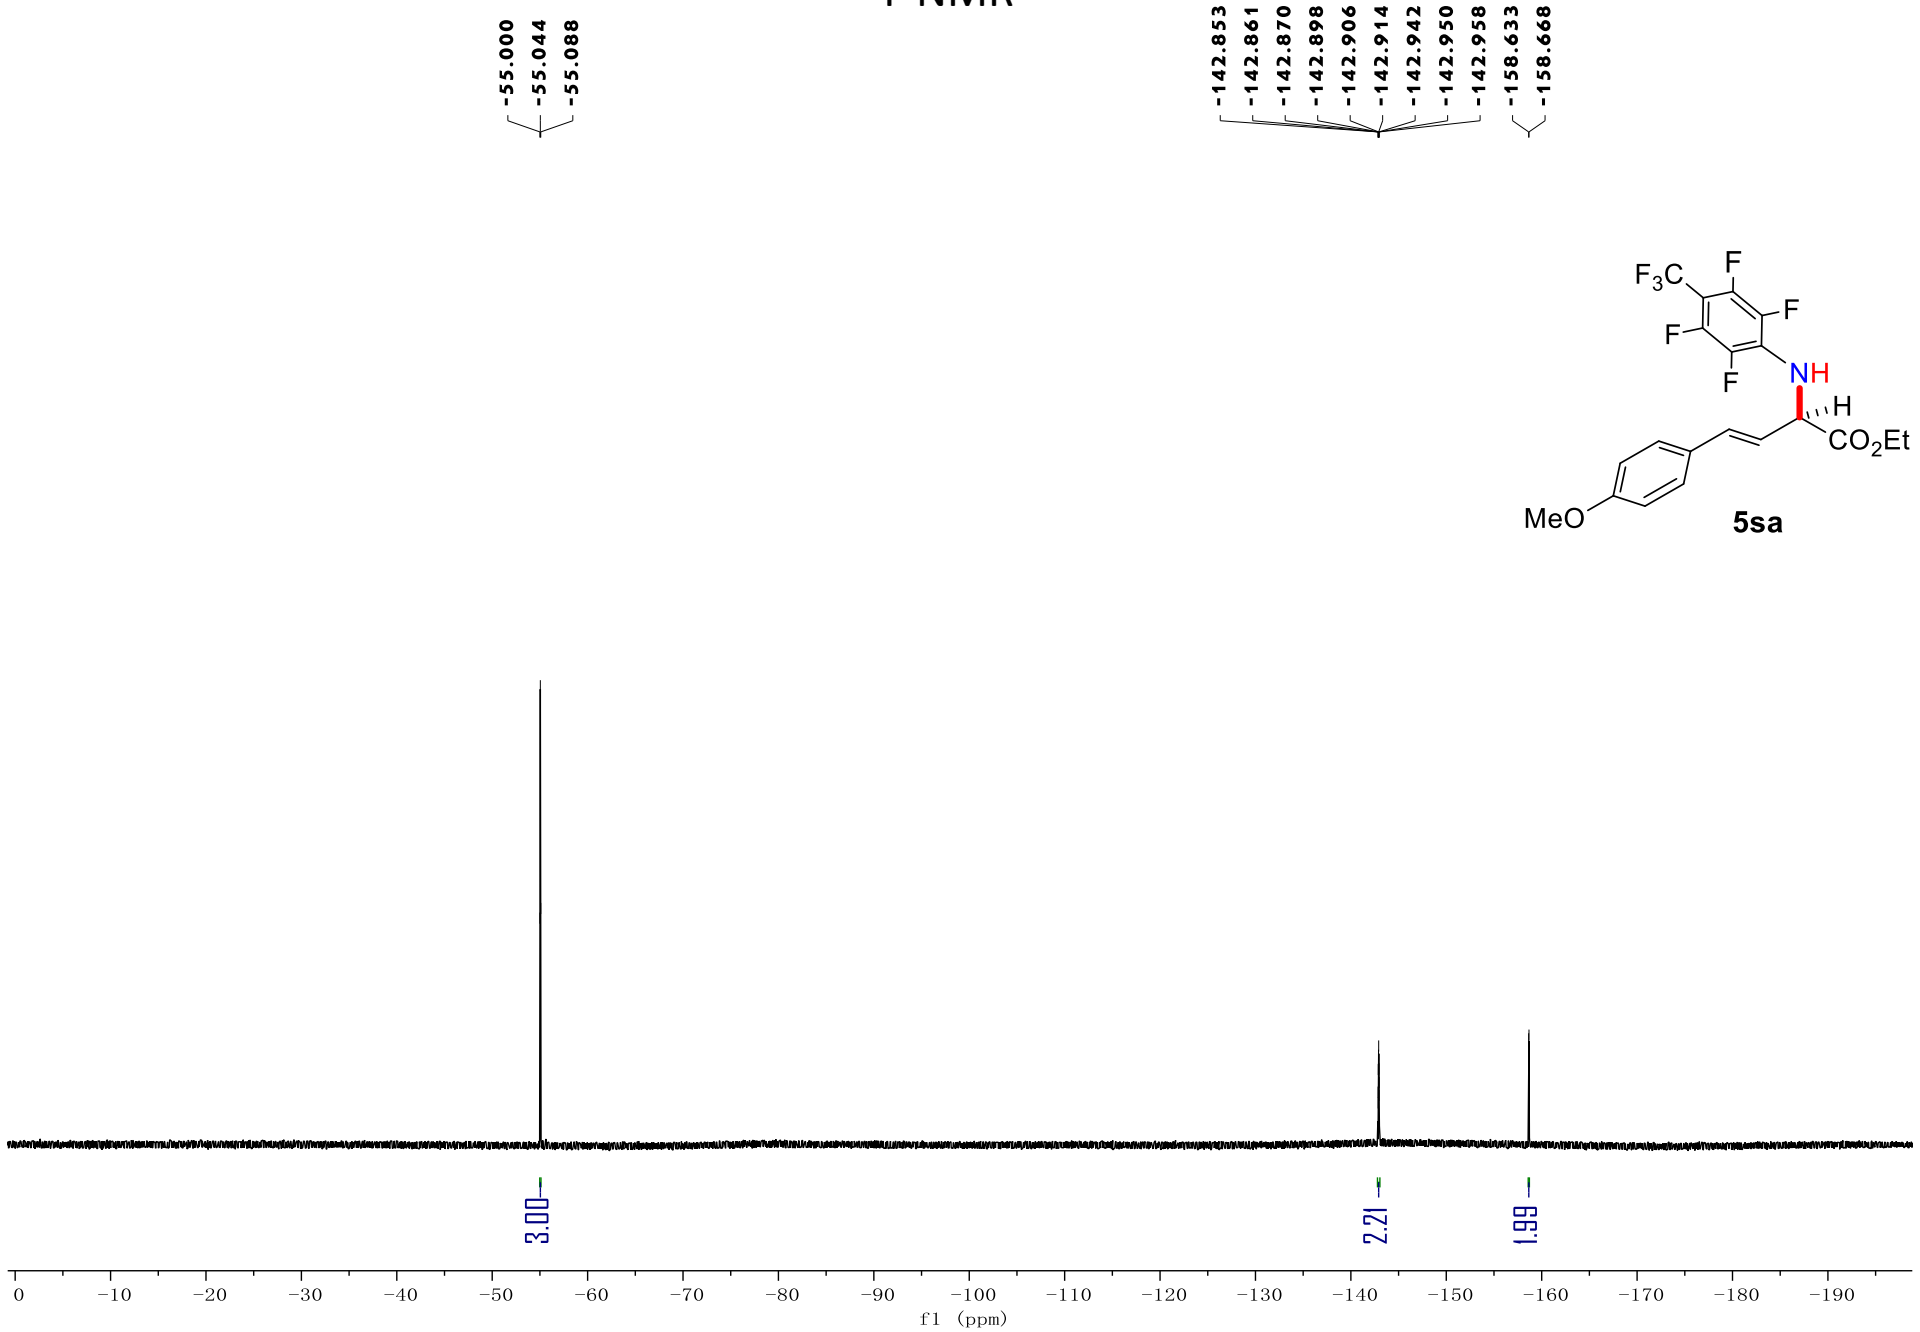



# HPLC

Sample Information  
Sample Name : P0X-548-4-IA5%0.8mL.lcd  
Sample ID : P0X-548-4-IA5%0.8mL.lcd  
Data File : P0X-548-4-IA5%0.8mL.lcd  
Method File : P0X-5% 0.8.mL-30min.lcm

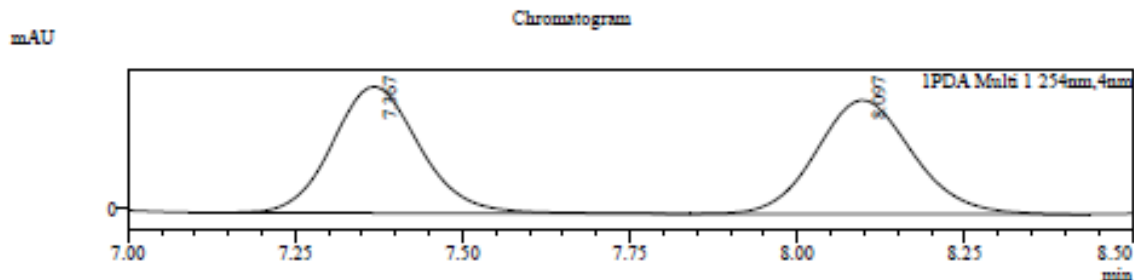

UV Spectrum  
Retention time = 7.367

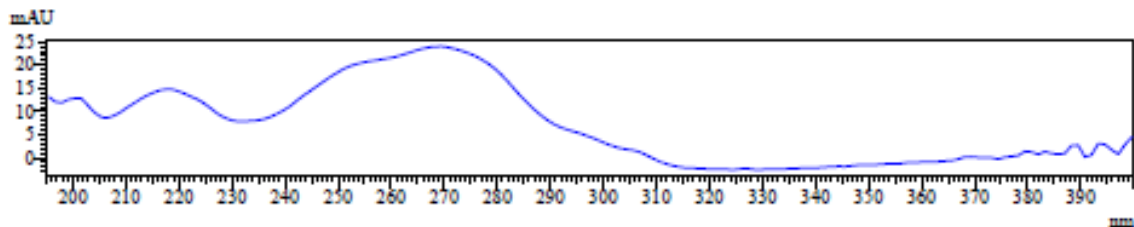

UV Spectrum  
Retention time = 8.097

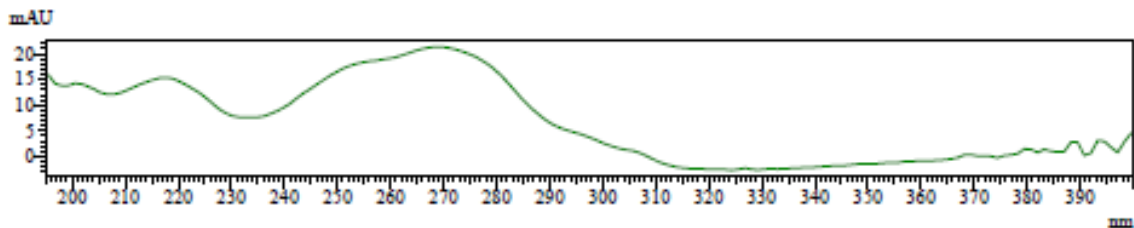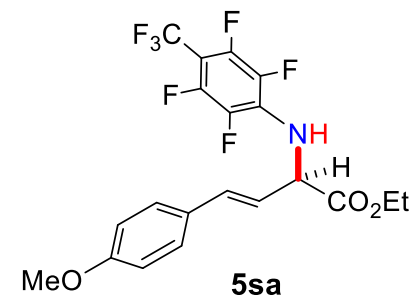

Peak Table

| Peak# | Ret. Time | Area   | Area%   |
|-------|-----------|--------|---------|
| 1     | 7.367     | 191108 | 50.186  |
| 2     | 8.097     | 189691 | 49.814  |
| Total |           | 380799 | 100.000 |

# HPLC

Sample Information  
 Sample Name : POX-1252-4-IA-5%-0.8mL.lcd  
 Sample ID : POX-1252-4-IA-5%-0.8mL.lcd  
 Data File : POX-1252-4-IA-5%-0.8mL.lcd  
 Method File : POX-5%.0.8.mL-30min.lcm

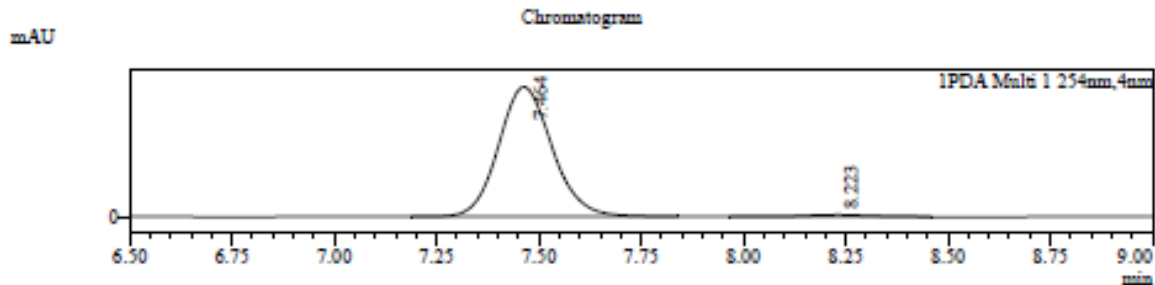

UV Spectrum  
 Retention time = 7.464

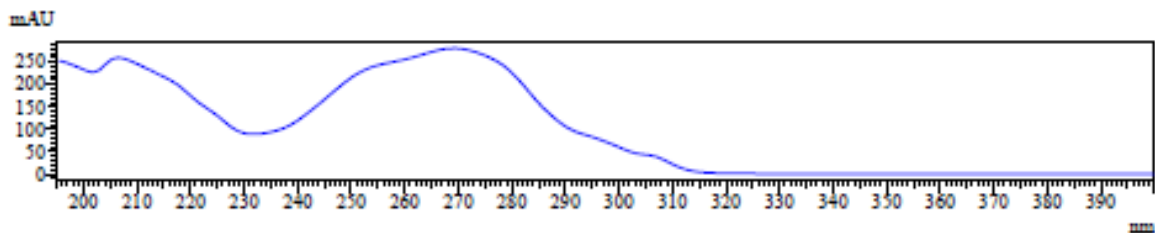

UV Spectrum  
 Retention time = 8.223

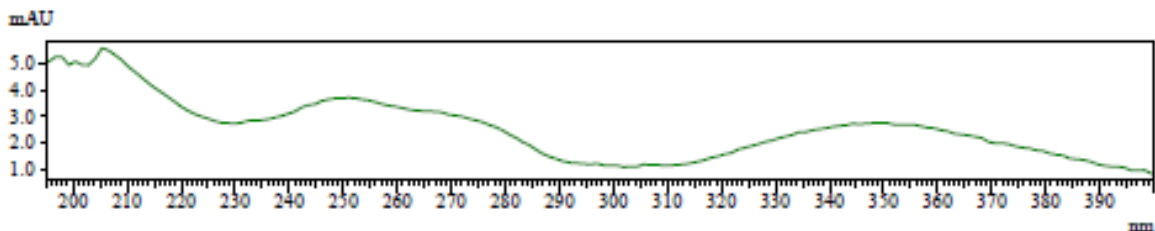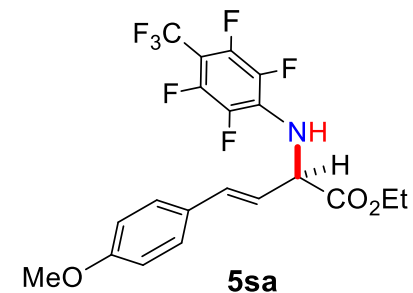

Peak Table

PDA Ch1 254nm

| Peak# | Ret. Time | Area    | Area%   |
|-------|-----------|---------|---------|
| 1     | 7.464     | 2170314 | 98.575  |
| 2     | 8.223     | 31383   | 1.425   |
| Total |           | 2201697 | 100.000 |

# <sup>1</sup>H NMR

7.353  
7.348  
7.343  
7.338  
7.334  
7.329  
7.258  
5.590  
5.575  
5.428  
5.412  
4.652  
4.644  
2.045  
2.023  
1.665  
1.661  
1.640  
1.587  
1.580  
1.560  
1.554  
1.256  
1.232  
1.086  
1.062  
1.040  
0.948  
0.941  
0.923  
0.910  
0.897  
0.891  
0.884  
0.878  
0.869  
0.863  
0.844  
0.837  
0.820  
0.813  
0.558  
0.544  
0.342  
0.328

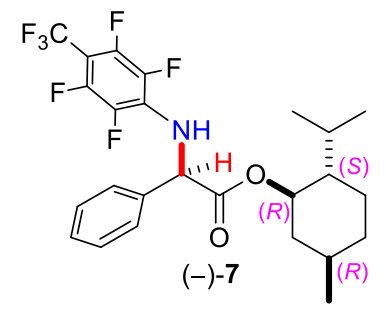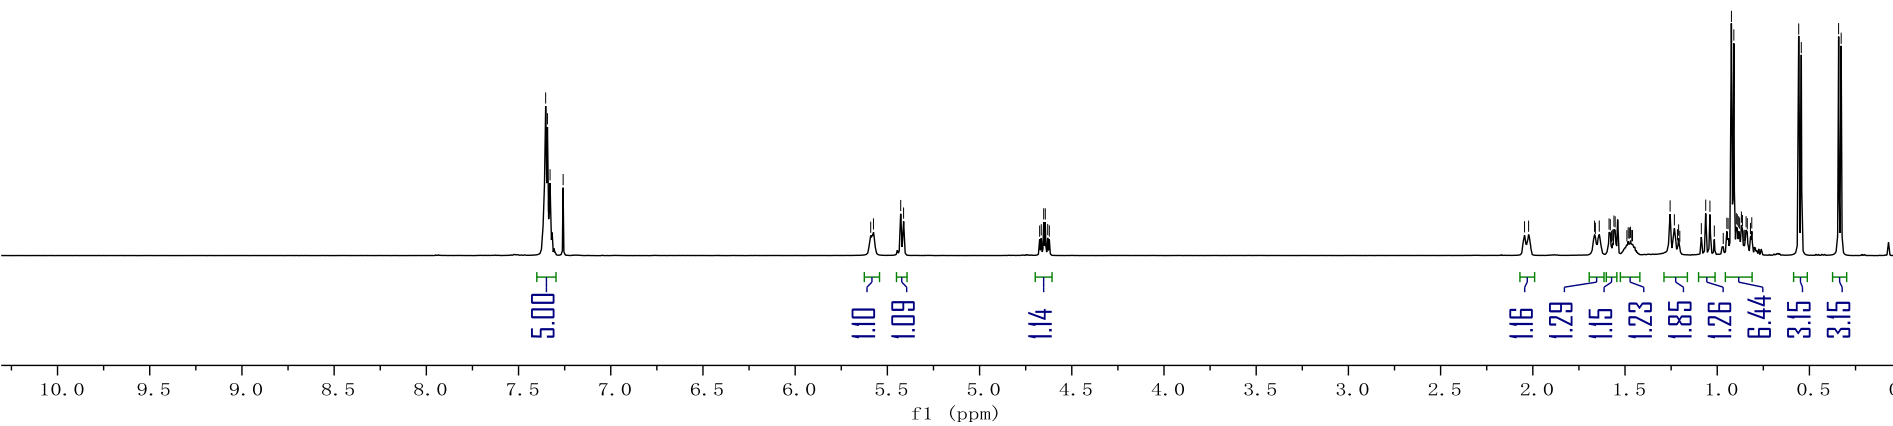

# <sup>13</sup>C NMR

- 170.429
- 145.759
- 143.710
- 137.870
- 137.744
- 136.946
- 135.994
- 135.948
- 135.913
- 135.871
- 135.819
- 129.300
- 129.212
- 129.178
- 129.120
- 129.030
- 128.913
- 128.885
- 126.960
- 124.523
- 122.503
- 120.333
- 118.162
- 97.431
- 97.153
- 77.230
- 76.976
- 76.721
- 60.760
- 47.085
- 40.671
- 34.029
- 31.405
- 25.293
- 22.877
- 21.917
- 20.412
- 15.447

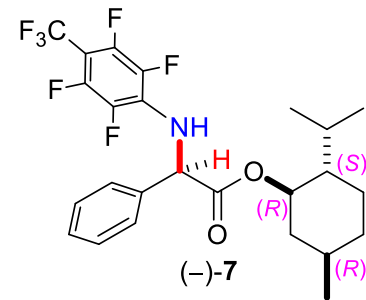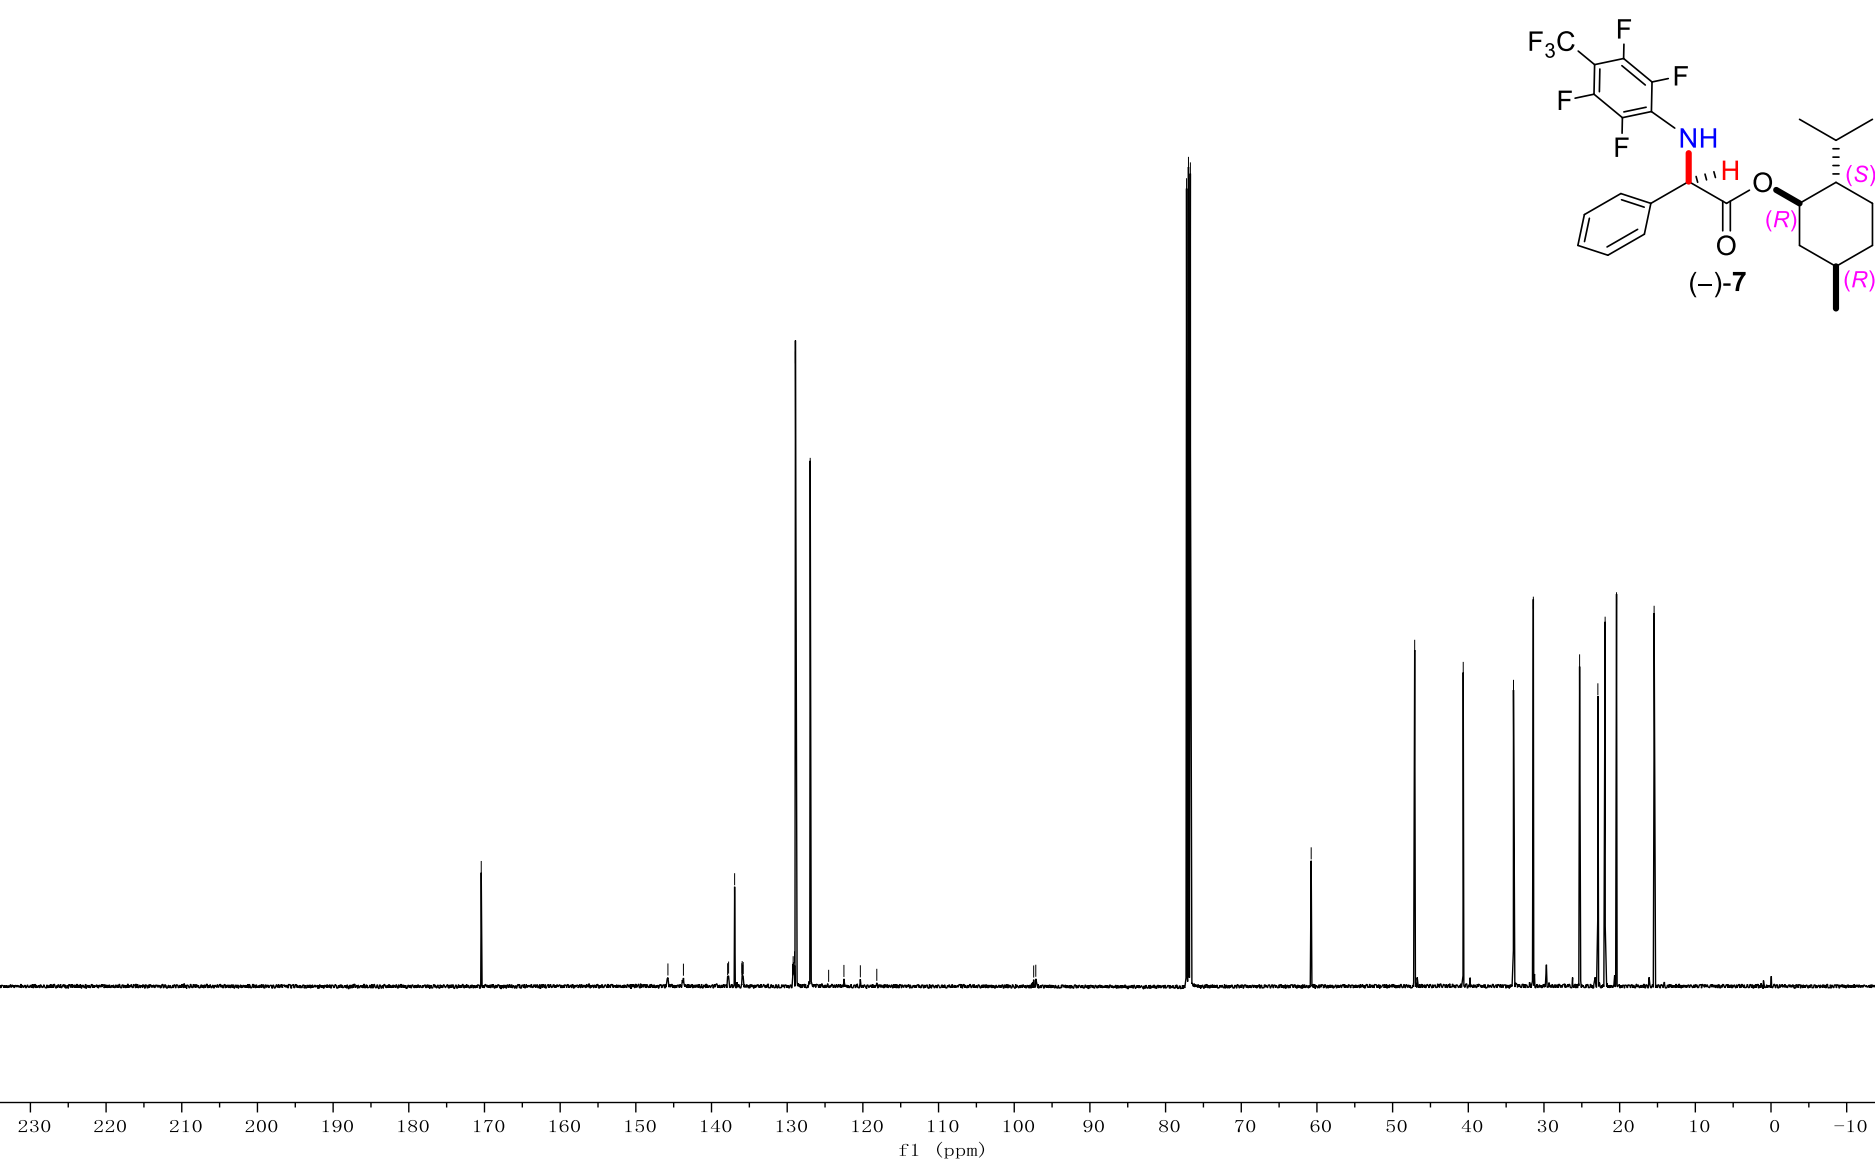

# <sup>19</sup>F NMR

-55.033  
-55.077  
-55.122

-142.928  
-142.941  
-142.957  
-142.972  
-143.001  
-143.017  
-143.046  
-143.061  
-143.077  
-143.090  
-143.105  
-158.654  
-158.686

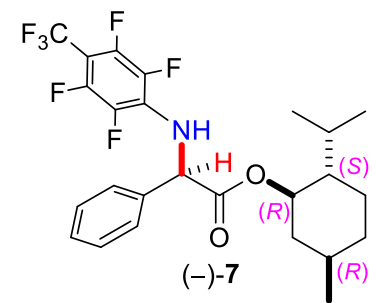

3.00

2.07

2.04

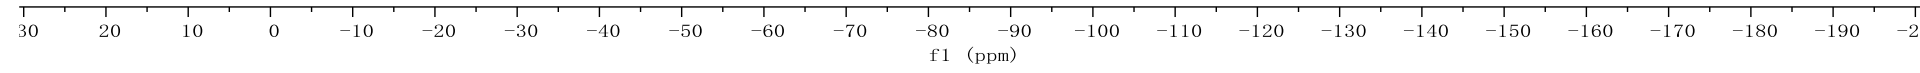

# <sup>19</sup>F NMR

-55.027  
-55.035  
-55.072  
-55.080  
-55.116  
-55.124

-142.989  
-143.005  
-143.016  
-143.033  
-143.061  
-158.479  
-158.509  
-158.640  
-158.675

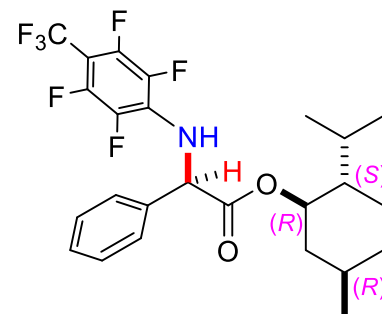

(-)-7 (dr=1:1)

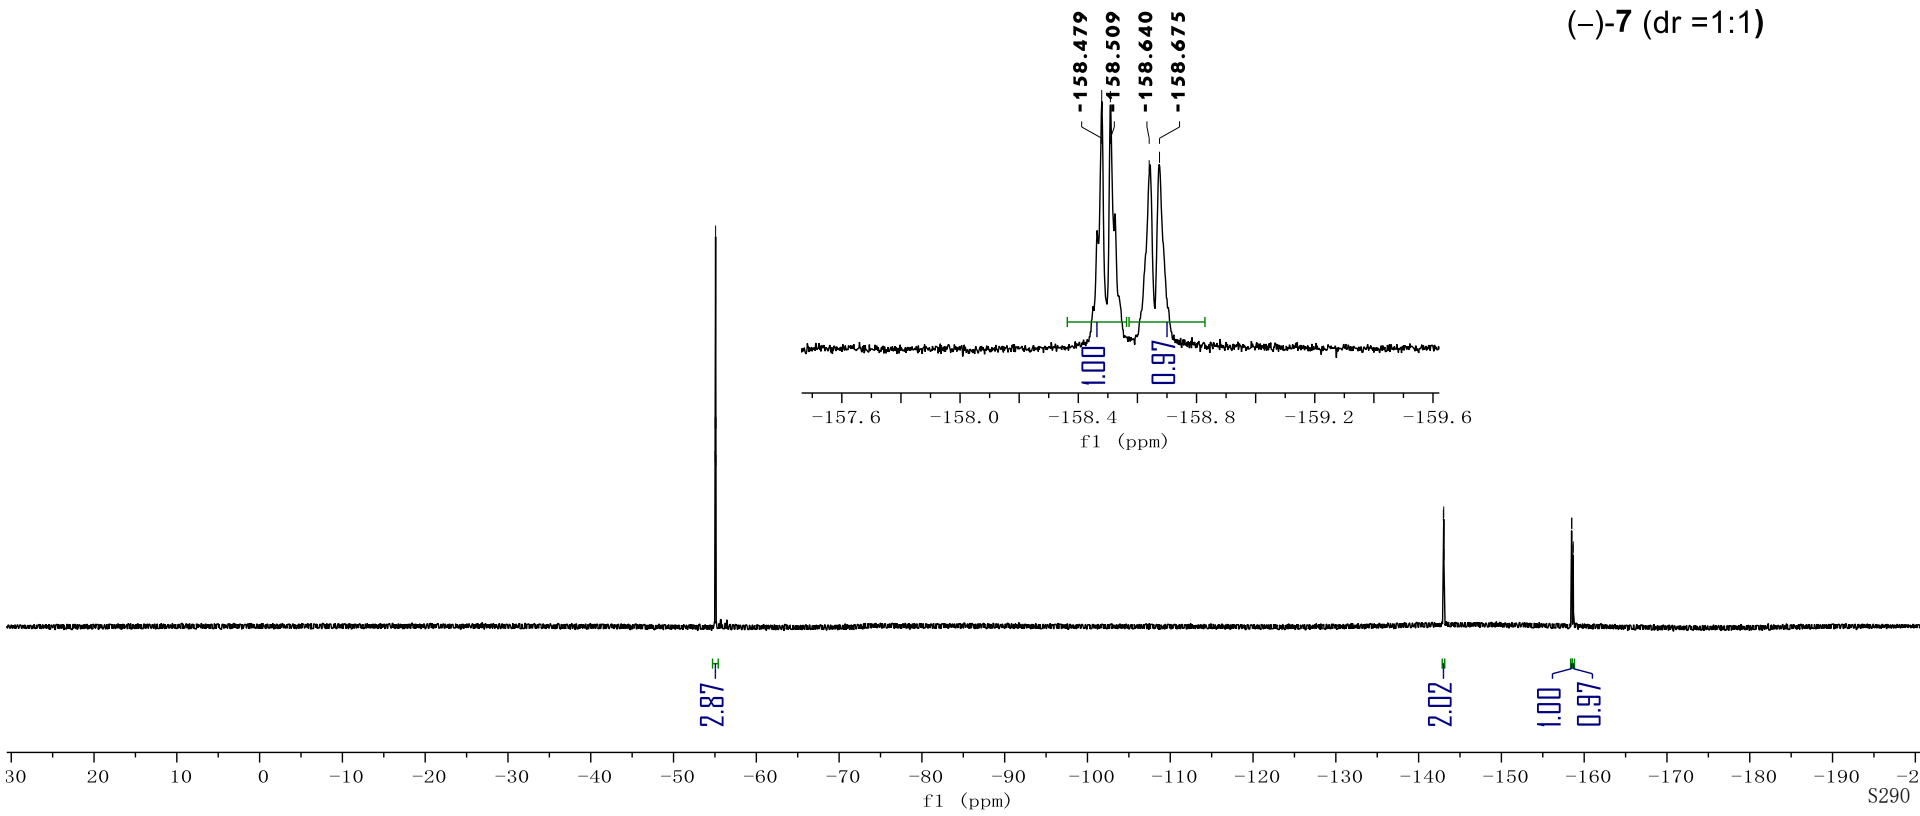

# <sup>19</sup>F NMR

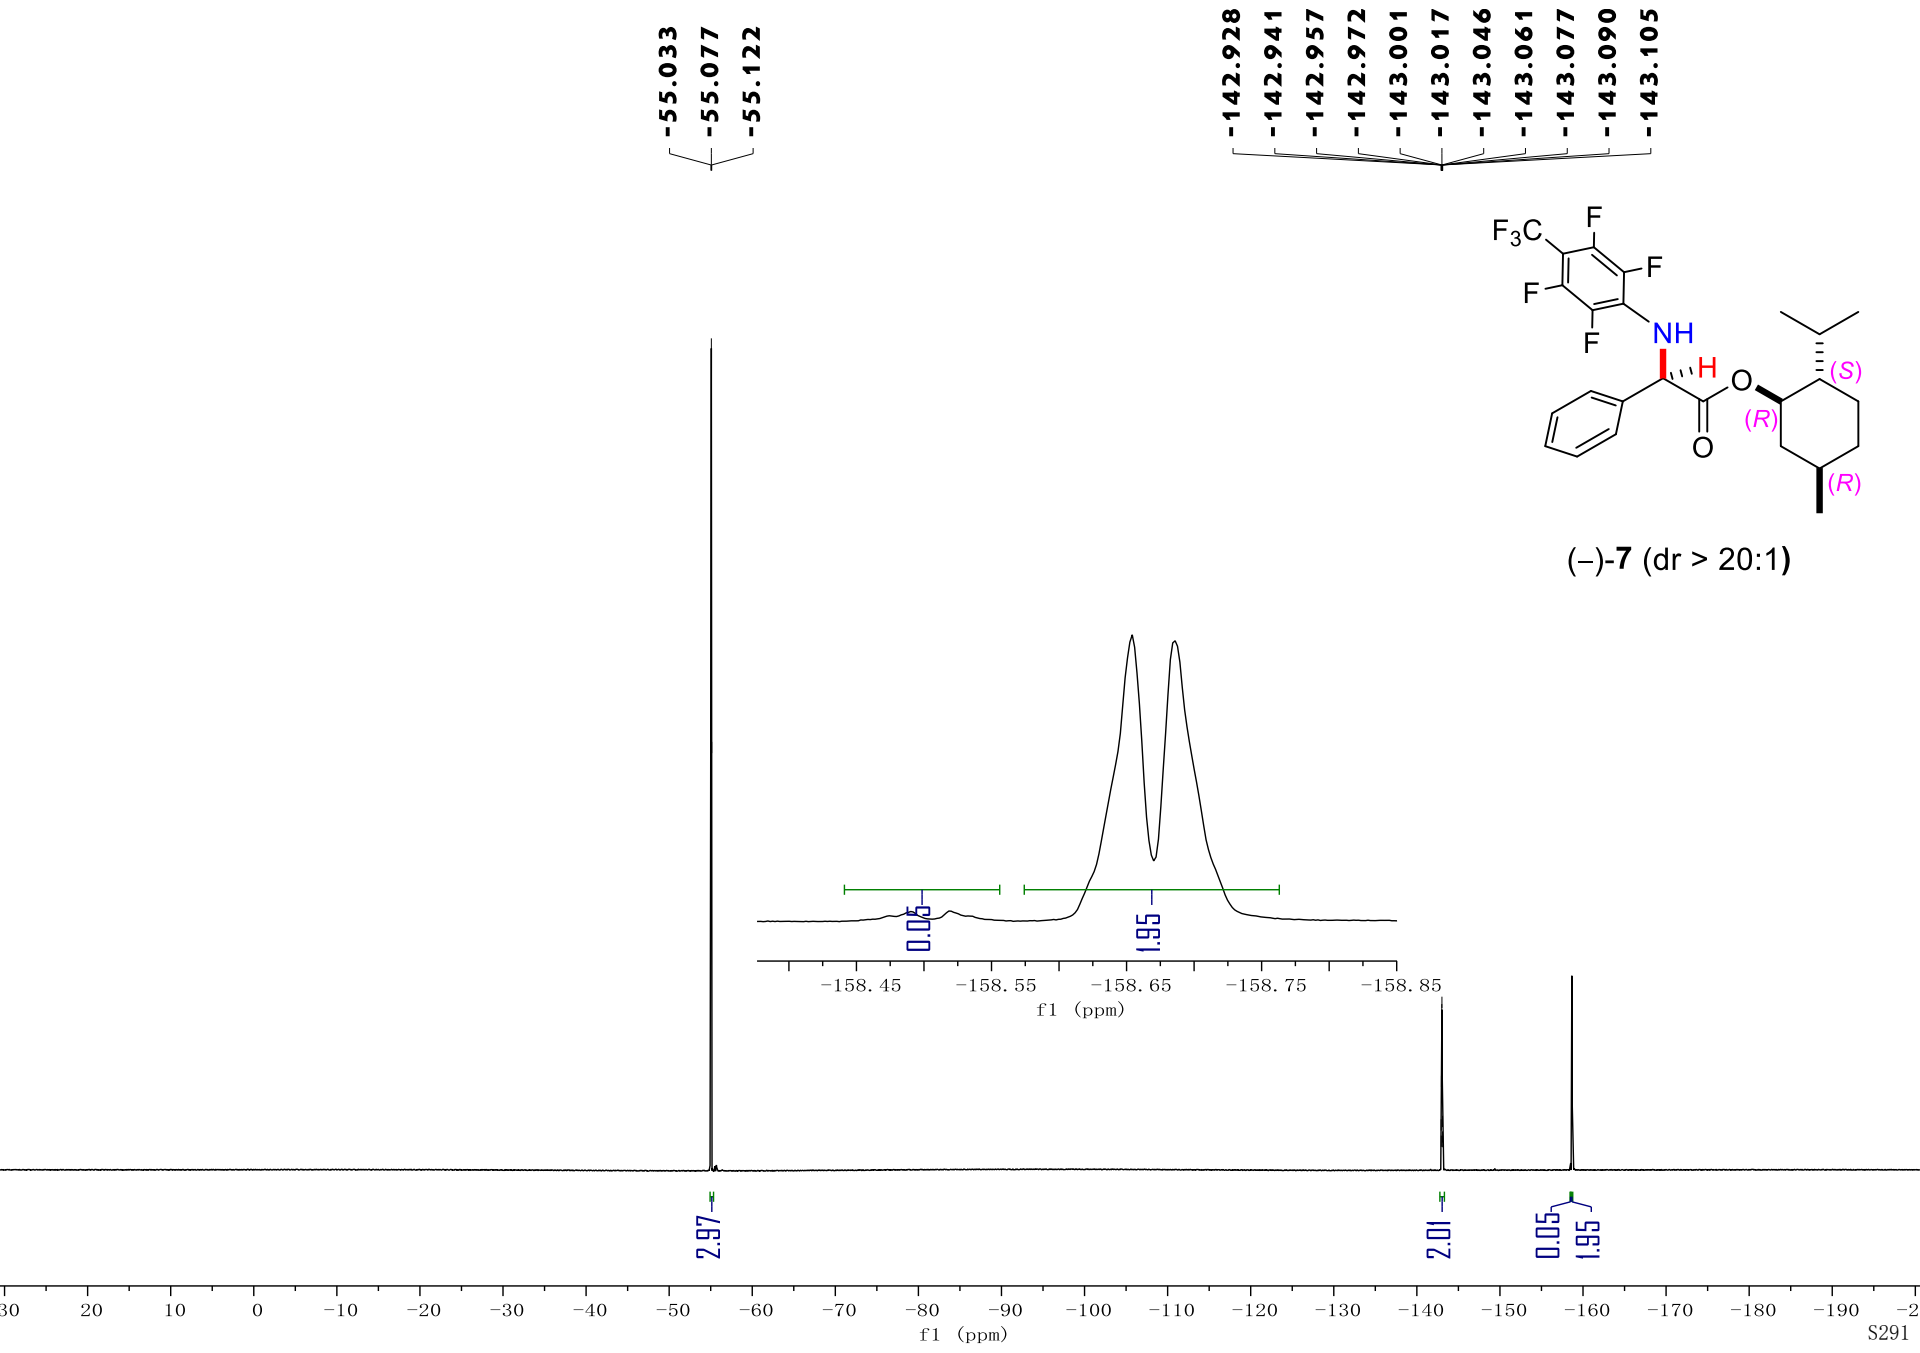

Supplement: NIHMS1650744-supplement-Supporting_Information.pdf [file NIHMS1650744-supplement-Supporting_Information.pdf]
